# Supplementary material for: Comprehensive Analysis of Cytochrome P450 Monooxygenases Reveals Insight Into Their Role in Partial Resistance Against Phytophthora sojae in Soybean
Source: Front Plant Sci. 2022 Apr 14;13:862314. doi: 10.3389/fpls.2022.862314 (PMC9048032; doi:10.3389/fpls.2022.862314)
Supplement: Supplementary Table 1 — Differentially expressed GmP450 genes upon Phytophthora sojae infection. [file Table_1.xlsx]

## Sheet: Bioprojects
List of differntially expressed GmP450s in all five RNA-seq databset analysis. Different colour given to different dataset along with pattern of expression of particular gene has been also mentioned with U & D letters depicting up and down regulation respectively.
Bioproject ID	Cultivars Used	Type of Tissue used	Time Points for Sample Collection	Reference
PRJNA324419	Williams	Hypocotyl	24hpi (hours post inoculation)	(Li et al., 2016)
PRJNA544432	Harosoy63 and William82	Imbibed seeds of Harosoy63 and Hairy roots of William82	24 and 48hpi	(Jahan et al., 2020)
PRJNA210431	Williams and its NILs having Rps1-a, Rps1-b, 1-c and 1-k Rps3-a, 3-b, 3-c, 4, 5, and 6	Hypocotyl	24 hpi	(Lin et al., 2014)
PRJNA318321	Williams 82	Roots	0.5, 3, 6 and 12hpi	(Jing et al., 2016)
PRJNA478334	Conrad, Sloan and their RILs	Roots	24hpi	-
PRJNA574764	PI 449459 &Misty	Roots	0, 4, 7, 14, 21 dpi	(de Ronne et al., 2020)

## Sheet: Gene Expression Methodolgy
All the RNA-seq and differential expression analysis was performed using the CLC Genomics Workbench version 22.0 https://resources.qiagenbioinformatics.com/manuals/clcgenomicsworkbench/current/User_Manual.pdf
For RNAseq analysis sequencing reads: single or paired reads are uploaded seperately, trimmed, mapped on william82 v4 genome and counted using the default parameters. The pipeline counts both paired and single mapped reads as one. For differential expression analysis different stragtegies were used based on the Bioproject as described below.
The CLC Genomic Workbench uses multi-factorial statistics based on a negative binomial Generalized Linear Model (GLM) to calculate the differential expression
PRJNA544432	This Bioproject involves two soybean cultivars and experiment involved multiple biological replicates therefor genes showing fold change more than 2 or less than 0.5 with p-value less than 0.05 in any cultivar was selected as differnetially expressed and choosen for analysis.
PRJNA574764	This Bioproject involves two soybean cultivars tested at different time points and experiment involved multiple biological replicates therefore genes showing fold change more than 2 or less than 0.5 with p-value less than 0.05 in any cultivar or at any time point were choosen for analysis.
PRJNA210431	This Bioproject involves reads from soybean cultivar Williams and its NILs. Because of lack of biologal replicates, all the infected lines were used as treated group and all control lines used as control group and differtial expression analysis tool of CLC workbench was used while controlling for genotypes where genotypes correspond to different soybean lines. Genes showing fold change more than …
PRJNA318321	This Bioproject involves reads from one cultivar at different time points but because of absence of biological replicates no p-value were calculated and genes showing fold change more than 2 or less than 0.5 at any time point were selected as differentially expressed and choosen for analysis.
PRJNA478334	This Bioproject involves reads from soybean cultivars Conrad and Slaon and 93 RILs from Conrad x Sloan F9:11 mapping population. Because of lack of biologal replicates all the infected lines were used as treated group and all control lines used as control group and differtial expression analysis tool of CLC workbench was used while controlling for genotypes where genotypes correspond to different…
PRJNA324419	This Bioproject involves reads from soybean cultivar Williams without any biological replicates. No p-value were calculated and genes showing fold change more than 2 or less than 0.5 were selected as differnetially expressed and choosen for analysis.

## Sheet: PRJNA544432
PRJNA544432
Gene ID	GmP450 Family	FC (W82_Hairy_Roots_induction over water_24h)	p-value (W82_Hairy_Roots_induction over water_24h)	FC (Harasoy63_Seeds_induction over water_48h)	p-value (Harasoy63_Seeds_induction over water_48h)	Up or Down regulation
Glyma.09G282900	CYP707	0.225548	0.0234804	0.330297	0.000624025	Down
Glyma.07G089900	CYP736	0.365939	2.16929e-05	1.3016	0.739511	Down
Glyma.06G176100	CYP71	0.387812	0.000227926	1.02067	0.875289	Down
Glyma.08G327200	CYP71	0.154069	0.0323626	0.543502	0.1508	Down
Glyma.08G326900	CYP71	0.0685248	0.00392497	2.36575	0.608659	Down
Glyma.10G115400	CYP71	70.5669	0.00830374	0	0	Down
Glyma.01G179700	CYP71	26.9258	0.0468788	0.402864	0.0589074	Down
Glyma.17G125300	CYP71	0.270143	0.0155867	0	0	Down
Glyma.11G250200	CYP78	0.224919	1.91605e-07	0.441679	0.426775	Down
Glyma.07G052300	CYP78	0.274107	1.39818e-05	0.324058	1.21637e-10	Down
Glyma.16G021200	CYP78	0.39034	0.00200795	0.445876	3.96666e-06	Down
Glyma.01G216900	CYP87	0.446759	0.00372976	0.495486	0.298118	Down
Glyma.11G026200	CYP87	0.469333	0.00683408	0.298207	0.0402953	Down
Glyma.11G108300	CYP76	0.197419	0.0282583	0.728468	0.350429	Down
Glyma.01G169200	CYP84	0.471615	0.0347393	0.337616	0.0084222	Down
Glyma.07G118200	CYP714	0.353423	0.0261289	1.29292	0.419061	Down
Glyma.18G049500	CYP714	0.275938	0.000691736	0.347084	0.00916936	Down
Glyma.17G242200	CYP707	0.414556	0.000326988	0.608433	0.0295285	Down
Glyma.17G227500	CYP711	0.546747	0.0007428	0.355401	3.0383e-05	Down
Glyma.05G042600	CYP71	0.851376	0.801232	0.291445	4.44089e-16	Down
Glyma.04G110400	CYP71	0.811662	0.856961	0.316668	0.0141305	Down
Glyma.19G240800	CYP78	0.306055	0.0823145	0.174998	0.00946103	Down
Glyma.03G030900	CYP83	0	0	0.275367	2.54463e-13	Down
Glyma.03G031000	CYP83	0.721614	0.00743629	0.293432	1.61653e-10	Down
Glyma.11G175900	CYP86	0.782611	0.154266	0.0781024	3.69739e-08	Down
Glyma.14G192500	CYP86	0.708681	0.0308425	0.105874	3.30564e-05	Down
Glyma.11G100100	CYP86	0.619807	0.00645366	0.190179	9.63977e-06	Down
Glyma.14G059900	CYP90	1.00563	0.984128	0.201385	1.93424e-05	Down
Glyma.01G175500	CYP90	0.981747	0.924042	0.273857	0.00732015	Down
Glyma.02G051600	CYP90	0.918354	0.663611	0.334468	2.48629e-05	Down
Glyma.13G152202	CYP94	0.611316	0.0644673	0.133866	0.00405348	Down
Glyma.05G003100	CYP96	0	0	0.0770124	0.00959679	Down
Glyma.12G067100	CYP93	0	0	0.0750815	2.10705e-07	Down
Glyma.11G074100	CYP84	0.546907	0.0211039	0.25656	1.44596e-05	Down
Glyma.16G131200	CYP84	1.16187	0.328413	0.290133	0.0336004	Down
Glyma.13G072100	CYP75	0.598838	0.0920735	0.254854	0.00231885	Down
Glyma.14G078600	CYP74	0.68337	0.0266438	0.390217	0.0176098	Down
Glyma.07G162900	CYP74	0.555857	0.000126001	0.379091	5.22025e-10	Down
Glyma.11G122700	CYP74	0.972417	0.82037	0.229597	0	Down
Glyma.16G195600	CYP71	19.156	1.02141e-14	9.11603	2.28673e-12	Up
Glyma.05G042800	CYP71	6.95712	1.49108e-05	3.22351	2.74114e-12	Up
Glyma.10G115500	CYP71	2.9385	0.0546132	0	0	Up
Glyma.11G062600	CYP71	7.42558	1.56735e-10	9.04285	2.71216e-09	Up
Glyma.14G015100	CYP71	2.33484	0.00226976	2.96413	0.000267352	Up
Glyma.11G062500	CYP71	15.4738	7.99361e-15	4.00731	0.00116366	Up
Glyma.18G080400	CYP71	10.9087	7.02311e-09	3.36173	0.000236871	Up
Glyma.05G010200	CYP734	2.52344	0.000121176	1.94387	0.305496	Up
Glyma.20G114200	CYP73	2.0413	0.000296943	10.1162	0	Up
Glyma.05G022100	CYP75	7.41082	2.81837e-09	4.53889	5.12294e-07	Up
Glyma.08G104100	CYP78	3.3816	1.50616e-07	1.00104	0.997248	Up
Glyma.01G135200	CYP82	52.9469	0	15.7395	9.7263e-11	Up
Glyma.13G068800	CYP82	4.00883	6.51984e-10	4.95975	1.33744e-06	Up
Glyma.13G285300	CYP82	14.3009	2.77556e-15	6.4847	1.11395e-07	Up
Glyma.15G203500	CYP82	3.48679	0.0208397	2.30301	0.00184671	Up
Glyma.08G140600	CYP736	3.3989	5.78624e-09	2.91216	0.000159571	Up
Glyma.10G203500	CYP76	2.70003	0.021085	5.71381	3.61531e-05	Up
Glyma.13G265300	CYP76	12.2964	0.00654725	0.766199	0.755287	Up
Glyma.09G048900	CYP81	17.3483	1.11022e-16	4.29805	3.14654e-06	Up
Glyma.09G049200	CYP81	14.7256	1.11022e-16	3.97409	1.92136e-05	Up
Glyma.09G049300	CYP81	19.6288	5.75096e-14	5.97718	1.02607e-06	Up
Glyma.15G156100	CYP81	6.28195	3.80651e-09	9.14818	1.32454e-07	Up
Glyma.03G143700	CYP93	2.19314	5.53513e-05	1.61438	0.0389853	Up
Glyma.19G146800	CYP93	5.06437	2.7637e-07	1.53089	0.0568279	Up
Glyma.13G173401	CYP93	2.85817	1.71706e-05	6.10018	0	Up
Glyma.13G173500	CYP93	2.83339	3.25542e-06	7.23181	0	Up
Glyma.11G051800	CYP81	7.51549	1.13434e-11	1.40391	0.0723912	Up
Glyma.03G160100	CYP94	2.16433	3.82392e-06	4.99948	0.0120605	Up
Glyma.07G212700	CYP707	0.680108	0.235725	4.74084	0.0353077	Up
Glyma.09G186400	CYP736	0.852761	0.143679	3.02632	2.33972e-07	Up
Glyma.10G202400	CYP77	1.07239	0.920606	3.59065	1.11022e-16	Up
Glyma.20G188000	CYP77	5.39372	0.0624023	2.4593	3.2881e-10	Up
Glyma.17G015400	CYP77	0.963578	0.826769	3.52207	1.88738e-15	Up
Glyma.01G061100	CYP78	0.923096	0.709923	3.96909	0.000266443	Up
Glyma.05G147100	CYP78	1.15007	0.407738	23.1641	1.1487e-09	Up
Glyma.04G035500	CYP82	0.880629	0.582567	4.96124	0.000137993	Up
Glyma.06G035400	CYP82	0.755331	0.455635	2.1403	0.00211506	Up
Glyma.19G014600	CYP82	1.73858	1.34796e-05	4.93645	6.29369e-09	Up
Glyma.20G002700	CYP86	0	0	7.39526	7.19282e-05	Up
Glyma.08G193900	CYP90	1.63258	0.000304754	3.02512	2.54977e-09	Up
Glyma.19G003600	CYP96	0.843498	0.240925	4.49577	5.88196e-08	Up
Glyma.20G004700	CYP96	0	0	4.5094	1.33227e-15	Up
Glyma.16G008600	CYP92	0.80815	0.11621	2.67685	1.11887e-06	Up
Glyma.17G134200	CYP706	1.05661	0.787636	2.84296	1.70545e-06	Up
Glyma.09G048700	CYP81	1.22903	0.456242	2.84821	0.000834465	Up
Glyma.19G144700	CYP93	1.44273	0.0344568	3.94638	3.54856e-09	Up
Glyma.03G142100	CYP93	1.99487	2.20791e-06	3.81843	2.32858e-12	Up
Glyma.10G092500	CYP93	1.30197	0.044571	2.44902	6.76927e-10	Up
Glyma.07G202300	CYP93	1.18098	0.271599	16.6586	0	Up
Glyma.07G089800	CYP736	0.878877	0.408537	2.09266	7.2066e-05	Up
Glyma.03G226800	CYP72	1.85853	0.000984673	2.16397	3.7327e-05	Up
Glyma.09G049100	CYP81	1.23247	0.244455	2.90569	0.00413702	Up
Glyma.16G076600	CYP707	1.12651	0.647067	2.88958	1.14773e-09	Up
Glyma.19G162100	CYP94	1.09641	0.688153	2.38508	0.021709	Up
Glyma.13G120500	CYP94	0.928206	0.809607	10.154	0.0121633	Up
Glyma.17G125400	CYP71	0.387155	0.00382169	0.0302328	0.0206208	Up or Down regulation
Glyma.18G080200	CYP71	0.389425	1.26312e-06	0.261268	0.399292	Up or Down regulation
Glyma.02G119600	CYP78	0.0353068	3.53466e-11	1.60593	0.0324708	Up or Down regulation
Glyma.11G060100	CYP82	0.178129	0.0515115	1.61214	0.0154776	Up or Down regulation
Glyma.10G092600	CYP93	0.0169668	0.00298503	2.36575	0.608659	Up or Down regulation
Glyma.05G220500	CYP716	0.252151	0.0106358	0.0897646	0.110676	Up or Down regulation
Glyma.08G026900	CYP716	0.366319	0.000421212	0.261296	0.399337	Up or Down regulation
Glyma.18G272300	CYP85	0.48077	0.0199732	3.46391	1.39574e-11	Up or Down regulation
Glyma.02G156000	CYP71	23.2902	0.0556269	9.25304	5.54612e-06	Up or Down regulation
Glyma.20G189600	CYP76	2.84818	0.267706	0.227974	0.00376667	Up or Down regulation

## Sheet: PRJNA574764
PRJNA574764		Fold Change in cultivars (Induction over mock) at different time points
Gene Id	GmP450 Family	Misty-4dpi (I/C)		Misty-7dpi (I/C)		Misty-14dpi (I/C)		PI 449459-4dpi (I/C)		PI 449459-7dpi (I/C)		PI 449459-14dpi (I/C)		PI 449459-21dpi (I/C)		Up or Down regulation
		FC	p-value	FC	p-value	FC	p-value	FC	p-value	FC	p-value	FC	p-value	FC	p-value
Glyma.01G061100	CYP78	0.0145856	0	0.0378774	1.4775e-10	0.0659201	3.68909e-06	0.0150089	2.79665e-13	0.0608565	4.34885e-12	0.00977235	0	0.184656	0.000107332	Down
Glyma.01G112400	CYP94	0.158821	0.0917693	0.160184	0.275869	12.1015	0.142144	0.328026	0.23028	1.14598	0.8459	5.87854	0.0114062	8.72266	0.191265	Down
Glyma.01G175500	CYP90	0.859209	0.553949	0.663928	0.374294	0.450731	0.0138177	1.25085	0.492967	0.65024	0.0803722	0.596989	0.0331545	0.895089	0.736393	Down
Glyma.01G181900	CYP82	0.847332	0.732959	1.48232	0.477317	0.38696	0.068012	1.03993	0.948265	0.21894	0.00210183	0.334664	0.0278171	0.354477	0.240381	Down
Glyma.01G216900	CYP87	0.018254	0	0.179629	0.00186529	0.134492	0.000141976	0.0620954	8.8349e-11	0.23529	4.4269e-07	0.0288412	0	0.341397	0.0191116	Down
Glyma.02G083200	CYP733	0.0463249	0.00173274	0.183399	0.0207118	0.16806	0.123644	0.0108906	6.64435e-06	0.0284981	7.66062e-06	0.0086613	0.00275073	0.0247573	0.0803155	Down
Glyma.02G256800	CYP90	0.175285	6.35993e-11	0.345395	0.0247093	0.201049	4.08366e-05	0.205837	1.97563e-07	0.39629	5.50663e-05	0.072755	0	0.472728	0.0314998	Down
Glyma.02G287300	CYP718	0.0173564	2.22045e-15	0.19944	0.00769701	0.40417	0.0675037	0.0303748	2.77624e-09	0.0880809	9.53023e-11	0.059022	0	0.344213	0.00891558	Down
Glyma.03G077800	CYP94	0.260032	0.250969	3.81621	0.487281	61.3735	0.0130923	0.107973	0.0575759	0.50497	0.51253	0.257109	0.440962	16.4835	0.0832367	Down
Glyma.03G115300	CYP51	0.91666	0.727131	1.21255	0.696356	0.522665	0.0599448	0.471487	0.0114806	1.08609	0.719817	0.518912	0.0014116	0.712336	0.475535	Down
Glyma.03G122000	CYP98	1.45436	0.140766	0.406487	0.0313776	0.472628	0.00727837	1.50422	0.157934	0.905456	0.616359	1.26682	0.191704	1.09535	0.752187	Down
Glyma.03G142100	CYP93	2.36833	0.00176438	4.0837	0.00588031	0.357106	0.00428996	0.876497	0.681896	0.293712	9.54418e-08	0.155399	0	0.44222	0.00780056	Down
Glyma.03G160100	CYP94	0.380841	0.046457	1.10859	0.849508	0.658348	0.467783	3.96278	0.0493517	1.38347	0.427731	0.421791	0.00863512	1.43382	0.665289	Down
Glyma.03G160300	CYP94	0.261183	0.000219157	0.787763	0.696549	0.479205	0.0548298	0.610564	0.280221	1.14648	0.531117	0.376242	0.00144328	1.023	0.950651	Down
Glyma.03G189900	CYP76	0.165631	1.01541e-09	0.168909	4.84129e-05	0.137106	2.41737e-08	0.181406	7.32574e-07	0.337637	2.4892e-06	0.0694154	0	0.5324	0.0285595	Down
Glyma.03G193500	CYP94	0.0222399	9.0254e-05	0.018372	0.0157913	0.268553	0.0746748	0.0407387	0.00209037	0.482268	0.255105	0.0106078	0.00435633	0.966645	0.964373	Down
Glyma.04G052100	CYP711	0.574264	0.0471286	0.24343	0.00162467	0.318581	0.00124419	1.04249	0.887916	0.314953	1.50342e-07	0.643496	0.0179359	1.0815	0.799026	Down
Glyma.05G019200	CYP78	0.0492839	2.22045e-16	0.0637463	9.00069e-07	0.0792406	8.10579e-05	0.0389287	3.40172e-13	0.215499	2.44127e-06	0.239477	0.000328452	0.812786	0.586648	Down
Glyma.05G042600	CYP71	0.0301238	0.0463848	0.364349	0.385964	2.53813	0.124802	0.0826226	0.188397	0.317331	0.306086	2.14288	0.127784	0.625925	0.529517	Down
Glyma.05G182800	CYP736	0.110475	0.00115086	0.250402	0.0552556	0.662042	0.601068	0.973884	0.969165	11.2478	3.68855e-07	1.18911	0.738946	0.296694	0.248506	Down
Glyma.06G035300	CYP82	0.599341	0.064618	0.447911	0.0666699	0.184901	0.00148473	0.562983	0.083792	0.459751	0.00193762	0.252961	4.59845e-11	0.268539	0.00387911	Down
Glyma.06G052700	CYP711	0.097976	9.47575e-13	0.147159	9.82444e-05	0.10032	2.1858e-08	0.193821	8.71094e-06	0.295092	1.1038e-06	0.186682	3.33067e-16	0.98504	0.961086	Down
Glyma.06G140000	CYP714	0.241729	3.65339e-06	0.290651	0.0188769	0.373521	0.00208634	0.726376	0.258688	0.326916	4.88975e-09	0.421897	1.27231e-07	0.967784	0.921447	Down
Glyma.06G238500	CYP72	1.23536	0.415374	0.545047	0.159593	0.595744	0.124705	1.42046	0.298887	0.478705	0.000346708	0.327656	2.42011e-10	0.562311	0.0762232	Down
Glyma.07G052300	CYP78	0.140748	6.3097e-07	0.0316255	1.89215e-12	0.0324734	0	0.0400568	3.01652e-10	0.0398853	0	0.000827211	0	0.179381	1.01414e-06	Down
Glyma.07G089700	CYP736	0.319813	0.0877018	0.101832	0.000389387	0.0744775	1.21666e-08	0.253422	0.025135	0.761787	0.441416	0.0318732	0	0.237027	0.000174749	Down
Glyma.07G089900	CYP736	0.127071	7.23474e-06	0.0458349	5.7415e-07	0.524288	0.254212	0.159911	0.00317773	0.363308	0.00790959	0.110888	3.92662e-08	0.787063	0.633278	Down
Glyma.07G110900	CYP51	0.627607	0.0643721	0.822873	0.691384	0.362975	0.00524124	0.324643	0.000206074	0.808092	0.371007	0.434128	7.20082e-05	0.685512	0.42919	Down
Glyma.07G162900	CYP74	0.321125	0.000152858	0.532864	0.112895	0.612727	0.18883	0.445831	0.0130143	0.396064	0.000461221	0.360788	1.4907e-06	0.908727	0.816836	Down
Glyma.07G194300	CYP71	0.0934239	1.38352e-05	0.59576	0.400942	0.120278	0.000382174	0.104361	0.00121406	1.11232	0.818157	0.145084	0.00090086	0.827647	0.773329	Down
Glyma.07G202300	CYP93	1.96758	0.0330169	0.469283	0.13244	0.403996	0.0982352	1.10354	0.804394	0.526221	0.0105017	0.382829	0.000180348	0.470629	0.216145	Down
Glyma.07G212700	CYP707	0.0534901	0.113081	0.496745	0.399228	3.16226	0.346802	0.121806	0.0219861	0.0978576	0.00443738	0.0872512	0.00122405	0.0736494	0.226186	Down
Glyma.07G218200	CYP706	0.616635	0.219877	0.471018	0.170171	0.415082	0.0659661	0.165968	0.000266189	0.553113	0.0877209	0.335632	0.000974791	1.09815	0.843782	Down
Glyma.07G258800	CYP77	0.181744	1.03127e-05	0.221544	0.00574328	0.140904	9.77364e-05	0.18148	0.00013906	0.252686	7.79046e-07	0.0595575	2.4758e-14	0.404259	0.0155791	Down
Glyma.07G267100	CYP71	0.23662	8.22596e-07	0.305853	0.00235836	0.142312	7.553e-07	0.155955	2.67105e-10	0.430936	0.00188597	0.101076	0	0.600229	0.260513	Down
Glyma.08G089400	CYP81	0	#N/A	0.0215583	0.0206819	2.32932	0.361814	10.8786	0.191433	0.501533	0.526336	13.399	0.181796	0.19306	0.434865	Down
Glyma.08G104100	CYP78	0.335431	0.000915487	0.326931	0.0300858	1.60609	0.281	0.186663	7.70809e-05	0.245853	1.86343e-08	2.50131	0.000218488	2.37557	0.021737	Down
Glyma.08G238100	CYP72	0.384957	0.0199387	0.204945	0.0244276	0.208217	0.00205891	0.444785	0.0310546	0.418209	0.000486435	0.182321	8.37539e-10	0.515741	0.263614	Down
Glyma.08G243600	CYP716	0.524525	0.0459812	0.238273	0.0018093	0.307252	0.000369111	0.602721	0.0992667	0.662399	0.0711344	0.266264	4.22118e-12	0.554417	0.0355608	Down
Glyma.08G326900	CYP71	0.0192337	0.0220435	0.0154544	0.0132082	0.40673	0.350412	0.0281348	0.046877	0.007157	0.0079552	0.020114	0.0173097	0.820606	0.796228	Down
Glyma.08G327100	CYP71	2.28298	0.440864	0.292649	0.255536	0.64874	0.596844	1.70227	0.597825	0.021892	0.0420783	0.819184	0.801214	0.795982	0.821407	Down
Glyma.08G350800	CYP93	0.241074	0.000957905	0.129913	0.00704895	0.156219	0.000800068	0.287109	0.000945303	0.205872	1.65007e-09	0.0735743	0	0.374423	0.10777	Down
Glyma.09G048800	CYP81	0.0235572	0	0.284791	0.031744	0.136418	5.98545e-07	0.0836292	2.89291e-09	0.108744	6.35048e-14	0.219509	0.000129335	0.60429	0.137374	Down
Glyma.09G160900	CYP720	0.133588	4.85112e-12	0.575381	0.282716	0.367588	0.00267354	0.574427	0.272813	0.375296	0.000116229	0.277996	1.2728e-10	0.527861	0.0530169	Down
Glyma.09G186300	CYP736	0.920018	0.779038	1.19975	0.678432	1.36649	0.324864	0.540619	0.0633907	0.309239	1.06301e-08	0.387192	1.98346e-08	0.500728	0.0472514	Down
Glyma.09G186400	CYP736	12.0511	7.83412e-07	1.04414	0.936168	0.1885	1.08962e-05	1.70669	0.461821	2.95388	0.00830275	1.27192	0.414511	0.842258	0.794584	Down
Glyma.09G218600	CYP707	0.453902	0.00202374	1.50693	0.345668	0.806408	0.600458	0.800959	0.548898	1.43911	0.109748	0.788444	0.355374	0.647221	0.217438	Down
Glyma.09G282900	CYP707	0.00116671	6.44358e-05	0.00682372	1.68989e-09	0.00774775	6.5545e-07	0.0710571	2.71356e-05	1.10498	0.812661	0.0506684	5.09548e-10	0.524302	0.309167	Down
Glyma.10G092600	CYP93	0.0644506	0.00111518	0.00127071	4.51399e-05	0.0443663	0.0772098	0.00706946	0.00515942	0.068505	5.46759e-05	0.180347	0.0939302	1.4344	0.642873	Down
Glyma.10G115300	CYP71	0.442544	0.0251934	0.0897153	7.01012e-07	1.19879	0.70778	0.101102	1.7696e-11	0.0640726	0	0.285624	4.65183e-14	0.155312	3.51073e-05	Down
Glyma.10G115400	CYP71	0.614874	0.297226	0.114976	2.45144e-06	0.365797	0.083058	0.117001	3.32884e-11	0.0860988	0	0.363442	1.14423e-05	0.220514	0.00246916	Down
Glyma.10G115500	CYP71	0.484355	0.0808699	0.132669	2.10946e-05	1.12566	0.810187	0.0930877	2.1095e-09	0.082877	0	0.231124	2.56086e-07	0.271606	0.00324412	Down
Glyma.10G296400	CYP76	0.443124	0.0881794	0.228196	0.00438226	0.306104	0.0511678	0.763678	0.632593	0.76315	0.524089	0.407695	0.030334	1.71581	0.330352	Down
Glyma.11G016200	CYP97	0.588459	0.0414896	0.412149	0.0462423	0.889539	0.725873	0.764684	0.381041	0.904385	0.634543	0.74168	0.146982	0.990917	0.978202	Down
Glyma.11G026200	CYP87	0.0833631	0	0.179173	0.000366583	0.222927	7.35121e-05	0.302169	0.00183034	0.259392	9.55457e-08	0.226334	1.14206e-06	0.458851	0.0357078	Down
Glyma.11G067700	CYP90	2.04455	0.00640879	0.628251	0.411315	0.486255	0.0562246	1.68555	0.114838	0.563721	0.0254202	0.665178	0.0987345	1.11901	0.72227	Down
Glyma.11G074100	CYP84	0.260548	0.000886326	0.0759691	7.36722e-07	0.0571941	1.26014e-11	0.103067	1.69361e-06	0.110305	4.33896e-11	0.0511476	0	0.406898	0.0089409	Down
Glyma.11G108300	CYP76	0.111136	3.0872e-07	0.118366	1.87477e-05	0.158358	0.00137634	0.0967321	2.67876e-07	0.256423	0.000149308	0.0976745	1.34031e-11	0.7391	0.523376	Down
Glyma.11G122700	CYP74	0.281359	1.33702e-06	0.322869	0.00936674	0.4321	0.00807549	0.661381	0.156911	0.364498	4.42471e-06	0.46013	0.000228169	0.566742	0.187123	Down
Glyma.11G185700	CYP94	0.794045	0.439373	0.711452	0.436154	0.759751	0.420214	0.930042	0.823505	1.0589	0.817981	0.416347	0.000623853	0.380184	0.00282932	Down
Glyma.11G228900	CYP90	0.182366	1.01606e-06	0.258097	0.00773473	0.94615	0.895849	0.266353	0.00109319	0.530228	0.0248673	1.2622	0.406785	1.17648	0.682829	Down
Glyma.11G250200	CYP78	0.0769577	9.17603e-09	0.168665	0.000606114	0.295589	0.00637941	0.0921065	0.00140006	0.307198	0.0152065	3.65764	6.07111e-07	1.83996	0.0907356	Down
Glyma.12G087200	CYP94	0.292676	0.000463457	0.571521	0.198284	0.673761	0.235967	0.533997	0.125124	1.17078	0.597873	0.252507	7.06511e-06	0.268524	0.00108504	Down
Glyma.12G191400	CYP74	0.577099	0.101282	0.545857	0.182798	0.433128	0.0450963	0.663541	0.316011	0.491141	0.0136327	0.45004	0.00637171	0.674066	0.392548	Down
Glyma.13G068500	CYP82	2.90816	0.196758	0.0700645	0.115404	0.147169	0.288098	0.183711	0.00140741	0.0342297	4.98994e-08	0.0311265	3.11794e-06	0.0386639	0.00682807	Down
Glyma.13G068800	CYP82	2.67706	0.0077623	0.670045	0.432355	0.167631	0.00211466	0.422563	0.149602	4.6535	2.34593e-09	1.82112	0.0200822	1.62085	0.365152	Down
Glyma.13G147500	CYP97	0.611539	0.0690912	0.621062	0.262009	0.757484	0.406526	0.782735	0.434138	0.447983	0.00076195	0.971017	0.884484	0.754627	0.394848	Down
Glyma.13G152202	CYP94	0.287502	0.00867285	0.0732773	8.11615e-07	0.137632	8.09076e-06	0.112079	6.00247e-07	0.167804	1.71714e-07	0.0262653	0	0.101265	8.83851e-05	Down
Glyma.13G181900	CYP71	0.762115	0.369221	0.423563	0.040633	0.225369	1.12764e-05	1.06133	0.871731	0.468155	0.00127747	0.144476	0	0.333155	0.000652131	Down
Glyma.13G371400	CYP701	0.228895	2.89612e-09	0.171859	2.50205e-06	0.161632	5.569e-09	0.325074	3.95008e-05	0.344961	2.42636e-08	0.11093	0	0.464804	0.041884	Down
Glyma.14G059900	CYP90	0.215639	6.54843e-08	0.509477	0.141706	0.17182	4.50285e-07	0.176106	1.81842e-09	1.01864	0.933639	0.17989	1.34671e-10	0.884462	0.697501	Down
Glyma.14G078600	CYP74	0.156938	1.18671e-10	0.485409	0.0651219	1.68702	0.213662	0.425533	0.0230164	0.79268	0.414334	0.461898	0.00303053	0.853149	0.598768	Down
Glyma.14G205200	CYP73	2.42839	0.0029782	0.604555	0.330223	0.204511	0.00320357	1.48273	0.372446	0.850275	0.458347	0.957754	0.831676	0.768244	0.56578	Down
Glyma.15G002200	CYP701	0.928109	0.899652	0.2878	0.145873	0.0149799	0.0141808	0.0764227	0.00266284	0.0820099	0.000543737	0.0464866	0.059611	3.10422	0.161809	Down
Glyma.15G095000	CYP710	0.530424	0.0117899	0.780519	0.578365	0.443796	0.00822476	0.405839	0.00173985	0.288105	4.43377e-10	0.171759	0	0.587241	0.0937077	Down
Glyma.15G135200	CYP88	0.229546	5.83994e-07	0.289346	0.0210805	0.55468	0.106018	0.416336	0.0143203	2.45862	7.56775e-05	2.08795	0.00387755	1.56088	0.149142	Down
Glyma.15G243300	CYP72	0.207171	6.65976e-06	0.267129	0.000411727	0.14587	4.11191e-07	0.521125	0.0483045	0.617982	0.0207476	0.122059	0	0.465815	0.0663749	Down
Glyma.16G021200	CYP78	2.08856	0.0350199	0.807432	0.685701	0.270291	0.00202043	1.59341	0.336272	1.19311	0.557439	0.134953	3.05311e-14	0.711229	0.298556	Down
Glyma.16G057100	CYP94	0.0665223	0	0.705592	0.430995	0.841279	0.646615	0.135478	2.44382e-06	0.584734	0.109158	0.158651	7.81486e-13	0.613784	0.208156	Down
Glyma.16G089700	CYP82	0.0286464	4.12543e-06	0.10696	0.00133374	0.31847	0.0796656	1.14095	0.833674	0.12976	0.000172699	0.172186	0.0010793	0.418286	0.193884	Down
Glyma.16G109300	CYP707	0.984647	0.972315	0.527712	0.112552	0.600695	0.0954635	1.87429	0.0828746	0.324716	5.76372e-07	1.17458	0.472656	0.314526	0.0212782	Down
Glyma.16G133800	CYP722	0.145019	3.12959e-08	0.0737466	2.1622e-07	0.0752001	1.08726e-09	0.160864	6.82048e-05	0.163216	4.6374e-13	0.0722692	0	0.757618	0.380014	Down
Glyma.16G182600	CYP715	5.57819	0.0835431	0.38051	0.393565	0.196433	0.07791	16.1218	0.0158234	1.6542	0.581417	0.839399	0.860339	0.191188	0.453468	Down
Glyma.16G210300	CYP720	0.0413885	0	0.351153	0.0319557	0.246444	0.000270046	0.161628	5.20163e-06	0.132459	5.62331e-07	0.0702066	0	0.37533	0.0243412	Down
Glyma.17G007200	CYP71	0.10074	0.00527646	0.0110175	7.83262e-13	0.00296627	7.11642e-10	0.0634874	0.000539517	0.0182977	6.41717e-10	0.00739284	4.34278e-08	0.527105	0.286253	Down
Glyma.17G080500	CYP78	0.00356669	0	0.043992	4.32115e-10	0.0931756	3.86934e-05	0.0115362	0	0.315448	0.000500427	0.100748	2.90907e-10	0.773317	0.537885	Down
Glyma.17G125300	CYP71	0	#N/A	0.164437	0.0500573	0.354109	0.150191	0.0304211	0.0678177	2.11228	0.526682	1.19878	0.814534	0.137893	0.364959	Down
Glyma.17G134100	CYP706	0.438737	0.00208189	0.123625	1.64313e-06	0.126662	4.38094e-11	0.300194	0.000433618	0.30947	6.29985e-07	0.246293	8.82294e-13	0.685937	0.296004	Down
Glyma.17G242200	CYP707	0.556643	0.235623	0.117941	0.000135716	0.1459	0.00170593	0.477574	0.186142	0.175947	0.000430579	0.0516111	1.84924e-11	0.572877	0.226766	Down
Glyma.17G249400	CYP721	0.0115517	0	0.0283393	1.25566e-13	0.0556324	1.9984e-15	0.178254	1.67438e-05	0.079119	0	0.00999932	0	0.196314	0.000162983	Down
Glyma.18G028300	CYP90	0.151071	4.67804e-12	0.24374	0.00203156	0.398038	0.023729	0.293359	0.000335464	0.2746	1.23079e-08	0.219879	6.13019e-10	0.361859	0.0231483	Down
Glyma.18G080200	CYP71	0.866127	0.676544	0.112068	8.98868e-05	0.160976	5.43491e-07	0.665999	0.283637	0.485673	0.0101761	0.23189	4.07524e-08	1.06377	0.859386	Down
Glyma.18G239900	CYP97	0.131319	2.22045e-16	0.284112	0.00560712	0.227283	3.62723e-06	0.193393	1.05325e-08	0.844164	0.425714	0.205097	7.77156e-15	0.847241	0.603212	Down
Glyma.18G272300	CYP85	0.311697	0.0112956	1.50208	0.530209	0.393649	0.0795848	0.419083	0.0850938	0.505341	0.071045	0.634637	0.255534	0.973142	0.959934	Down
Glyma.19G014600	CYP82	1.93474	0.0331225	0.734595	0.500327	0.0712834	7.45383e-11	0.205665	0.000966195	0.559311	0.0302732	0.786127	0.453809	0.704293	0.373319	Down
Glyma.19G014700	CYP82	1.86002	0.1012	0.784979	0.658734	0.39505	0.00432291	0.185141	0.000460762	0.431568	0.0082558	0.876	0.588528	0.427919	0.0107911	Down
Glyma.19G033900	CYP85	1.04954	0.885158	0.826068	0.757758	0.870757	0.730916	0.962339	0.900475	0.841421	0.428378	0.447617	0.000582729	1.05822	0.862617	Down
Glyma.19G057300	CYP96	0.0200217	0.0238742	0.134013	0.0180019	0.0245972	0.0320209	0.00633142	0.00391122	0.954109	0.936985	0.0501134	1.15686e-05	0.34976	0.116174	Down
Glyma.19G144600	CYP712	3.95447	0.000109911	0.20224	0.00361648	0.0884006	1.68294e-08	0.859421	0.784425	0.130602	6.64781e-08	0.149244	8.45102e-13	0.425054	0.0105697	Down
Glyma.19G240800	CYP78	0.104956	0.024416	1.00619	0.99321	0.124596	0.0609188	0.30403	0.130752	0.522385	0.348962	0.26387	0.193769	0.728057	0.728044	Down
Glyma.20G018900	CYP89	0.191955	0.031917	0.23564	0.046855	0.143521	0.000177437	0.0611734	0.00246814	0.0278487	2.93802e-08	0.358006	0.00445421	0.296236	0.0730818	Down
Glyma.20G041700	CYP75	0.0145499	0.014424	0.0329641	0.0424511	0.0536153	0.0955468	0.0223228	0.0330519	0.111256	0.00801573	0.0329998	0.036022	0.973389	0.968507	Down
Glyma.20G188000	CYP77	11.5419	0.00383052	1.57299	0.537789	0.292197	0.108285	2.78006	0.103541	1.3083	0.667944	3.64437	0.11618	0.745794	0.741713	Down
Glyma.20G189600	CYP76	0.0108812	1.61547e-06	0.0502725	1.32174e-05	0.0763033	0.000904313	0.0374874	7.04086e-05	0.0209091	5.48352e-07	0.0115834	1.10536e-06	0.429972	0.181309	Down
Glyma.01G135200	CYP82	117.753	0	1.39666	0.397082	1.11227	0.810071	7.52061	0.000331861	6.7275	7.26884e-07	2.38407	0.000215555	0.79823	0.734261	Up
Glyma.01G153300	CYP707	1.04524	0.873053	3.81556	0.00415582	1.6734	0.203493	1.14485	0.673157	3.94617	6.24668e-09	1.19159	0.554546	0.625353	0.295925	Up
Glyma.01G169200	CYP84	5.59088	5.05045e-06	4.79677	0.00115985	9.9497	1.6189e-09	7.13953	5.5344e-09	2.55852	0.00773561	10.5746	0	0.831023	0.701852	Up
Glyma.01G179400	CYP71	622.961	0	1111.09	0	344.139	0	202.247	0	123.645	0	122.016	0	3.25195	0.0197223	Up
Glyma.01G179500	CYP71	5.1783	0.112179	1.89621	0.467478	5.97173	0.0147634	14.3958	0.145364	6.85534	0.242739	15.9692	0.00411445	3.021	0.216132	Up
Glyma.01G179600	CYP71	298.239	0	33.654	4.44089e-16	4.79788	1.13884e-06	9.05463	0.00024287	3.3816	0.00073421	8.18051	0	0.72138	0.231885	Up
Glyma.01G179700	CYP71	6.75334	0.00194441	0.0807359	6.94646e-06	9.0964	0.00281603	11.0905	0.000228414	0.858194	0.780635	7.43281	3.19312e-05	0.285145	0.137269	Up
Glyma.01G181800	CYP82	7.89267	1.72085e-14	3.73612	0.00301948	3.23333	0.00383564	17.0836	2.42861e-12	2.54485	0.000495734	12.4236	0	2.10834	0.0425572	Up
Glyma.02G051600	CYP90	2.6545	0.013432	2.91127	0.0265731	6.49188	1.59779e-05	6.92395	2.30817e-08	4.61029	2.23464e-06	19.5146	0	2.94539	0.011043	Up
Glyma.02G119600	CYP78	4.04057	0.0209339	1.86736	0.326034	5.99205	0.0400313	1.24807	0.709905	2.04204	0.144376	0.894656	0.857417	1.12974	0.883347	Up
Glyma.02G156000	CYP71	21.0948	2.83455e-09	17.6294	4.73124e-05	27.6826	0	8.79151	1.40593e-06	6.934	4.65898e-10	4.83799	5.92062e-10	1.37415	0.604942	Up
Glyma.02G156100	CYP71	6599.92	8.91938e-08	4380.18	1.26232e-13	453.95	0	290.187	0	3936.29	5.4291e-08	56.4473	0	1.63972	0.323308	Up
Glyma.02G236500	CYP73	3.23462	9.23075e-05	0.936789	0.903822	0.288975	0.0180464	2.39734	0.0448561	0.423368	0.00136289	0.717421	0.159353	0.595418	0.377025	Up
Glyma.02G290000	CYP728	2.04867	0.00225107	0.576583	0.167884	0.915309	0.789745	2.21495	0.0200576	0.859107	0.491537	3.21887	2.40244e-10	1.21794	0.519669	Up
Glyma.02G298800	CYP71	14.494	0	7.25953	5.03359e-06	3.26859	0.000131769	4.47829	0.000498197	2.12324	0.017958	4.37872	3.33067e-16	1.10762	0.738044	Up
Glyma.03G008100	CYP86	7.25355	0.00860779	7.17845	0.0201286	0.281417	0.0453825	0.135871	0.00958638	1.75557	0.363513	0.774412	0.41882	0.846167	0.767576	Up
Glyma.03G020400	CYP704	21.2954	1.11022e-16	10.6375	2.61116e-06	6.49711	1.95974e-08	4.37745	0.0411127	50.7457	3.35588e-11	14.1185	0	3.68412	0.0185781	Up
Glyma.03G021200	CYP76	3.55263	5.26619e-07	1.12897	0.749396	0.774331	0.432532	1.63065	0.349654	0.248742	4.07705e-06	2.68398	1.03529e-08	0.455509	0.00395317	Up
Glyma.03G021600	CYP704	43.7308	0	12.9217	1.80561e-07	5.80451	7.03348e-08	8.96337	6.72763e-06	92.3877	0	13.6444	0	2.05088	0.080708	Up
Glyma.03G029900	CYP83	5.62419	0.00345274	14.1624	0.00198735	55.0704	2.31806e-11	2.3823	0.0803917	0.142722	0.0420497	52.5509	4.31707e-05	3.47634	0.192422	Up
Glyma.03G030400	CYP83	477.896	0.000276181	1463.21	0.000100482	1395.02	5.0937e-13	18.6046	0.00549836	9.83213	0.168847	64.7424	9.92733e-06	0	#N/A	Up
Glyma.03G030800	CYP83	0.0297309	0.0440779	0.799575	0.836004	3.34045	0.254955	4.18501	0.429299	0.279379	0.522394	29.1765	0.0790451	0.144107	0.381312	Up
Glyma.03G031000	CYP83	15.6004	0	5.21051	1.80169e-05	6.84544	4.31697e-09	4.32192	0.0128794	7.18882	3.61021e-11	49.0644	0	2.45648	0.00205245	Up
Glyma.03G031400	CYP83	0.0906751	0.167348	0.543716	0.584523	1.96736	0.484507	7.27064	0.249462	17.6884	0.00382069	30.7807	0.0636528	4.06553	0.20029	Up
Glyma.03G122300	CYP94	1.05856	0.836271	2.00917	0.120174	3.93466	0.000419751	1.0806	0.790419	0.534954	0.00300025	3.10503	4.57651e-09	1.61493	0.146531	Up
Glyma.03G142000	CYP93	3.10086	0.0268221	0.924521	0.88491	4.4648	0.00917494	1.20967	0.804654	0.618557	0.456856	2.6209	0.0304901	2.04216	0.293065	Up
Glyma.03G143700	CYP93	37.9565	0	12.3655	2.17201e-07	1.12429	0.819645	11.9524	2.4113e-06	10.738	0	1.91932	0.00622696	0.981366	0.972967	Up
Glyma.03G160200	CYP94	3.10059	0.0107566	1.27158	0.569735	0.66471	0.461745	3.24019	0.0391757	0.719944	0.186285	1.16083	0.555874	0.954687	0.903382	Up
Glyma.03G226800	CYP72	310.449	0	47.8385	0	30.4653	0	34.5985	4.25668e-08	13.0928	0	93.1	0	11.4534	1.01294e-05	Up
Glyma.04G030100	CYP722	8.51229	9.49065e-06	3.70884	0.0565838	1.97108	0.202438	9.25788	2.98231e-06	3.22256	0.00262923	6.19685	3.67586e-08	2.4344	0.106053	Up
Glyma.04G035000	CYP74	26.4552	2.86438e-14	20.3393	7.06413e-09	4.9334	1.78876e-05	15.3601	1.73546e-10	2.11023	0.0668024	5.59814	4.16001e-13	2.53864	0.17421	Up
Glyma.04G035500	CYP82	5.72865	5.79679e-06	2.7737	0.0372734	3.53087	0.00090997	2.59766	0.0304238	4.30524	2.06578e-06	8.38095	0	2.05286	0.0735104	Up
Glyma.04G035600	CYP82	0.352614	0.5753	18.813	0.119067	1456.06	1.14719e-05	16.6275	0.0182966	128.799	3.11262e-12	1967.15	3.21018e-05	1.29029	0.793731	Up
Glyma.05G003200	CYP96	2.0587	0.380167	0.53506	0.511375	19.9715	0.005879	0.82758	0.830815	1.2484	0.833314	40.7481	0.0585012	0.19306	0.434865	Up
Glyma.05G010200	CYP734	5.2453	2.4107e-07	10.3259	5.09872e-07	2.17951	0.0552582	6.0224	1.62927e-06	2.65745	0.000210446	0.77762	0.304691	1.05396	0.897905	Up
Glyma.05G021800	CYP75	1.72486	0.189096	1.36787	0.569342	1.80568	0.195167	1.83624	0.315857	1.8092	0.210042	8.23601	4.21885e-15	1.25918	0.586289	Up
Glyma.05G021900	CYP75	18.384	7.48745e-10	26.3467	4.54343e-06	9.3661	8.97713e-05	4.96782	0.0140611	4.20932	0.0274807	1.35106	0.513134	0.0654924	0.20584	Up
Glyma.05G022100	CYP75	56.5838	0	34.8248	0	14.197	2.97962e-12	58.744	0	15.5914	2.22267e-13	19.1456	0	1.21318	0.710113	Up
Glyma.05G042800	CYP71	11.1384	0.000496785	2.65752	0.166706	2.64531	0.0759369	2.96133	0.125277	1.55095	0.476649	7.15918	0.000188637	5.51259	0.138882	Up
Glyma.05G147100	CYP78	0.223496	1.53653e-09	0.722299	0.437137	2.8949	0.015588	0.348773	0.000640074	0.389434	5.55474e-05	3.21738	5.0314e-08	2.84967	0.00530621	Up
Glyma.05G166900	CYP716	14.2296	2.18051e-09	26.0102	2.69621e-07	30.896	8.04735e-11	13.3859	1.75294e-07	30.988	1.11022e-15	1907.28	2.08709e-05	2.43246	0.228873	Up
Glyma.05G233200	CYP736	5.18335	6.56747e-11	2.67977	0.00772494	2.00769	0.0183761	4.12183	4.44527e-07	1.15149	0.533499	2.62776	2.72319e-08	1.06601	0.819526	Up
Glyma.06G035400	CYP82	2.09537	0.299688	10.7165	0.00254557	3.6675	0.0137332	1.15549	0.86929	1.57157	0.479053	6.68453	2.34581e-07	2.56112	0.157543	Up
Glyma.06G176100	CYP71	4.63127	0.000120952	19.6278	2.32185e-07	15.4534	9.84901e-10	1.38397	0.493022	2.38063	0.020728	5.45445	3.02178e-09	1.62992	0.442359	Up
Glyma.06G176200	CYP71	4.2053	2.56346e-06	1.69277	0.313802	1.31281	0.482506	2.13888	0.0457456	2.47888	0.000143643	0.990246	0.967702	0.667963	0.105718	Up
Glyma.06G202300	CYP75	89.3524	0	50.1772	0	15.6635	0	42.0022	0	48.0541	0	284.859	0	1.40114	0.644598	Up
Glyma.06G215200	CYP734	9.43891	9.22313e-07	6.53884	0.000331681	1.86618	0.15134	2.72376	0.0323936	1.88354	0.080371	1.25005	0.482553	1.12429	0.839695	Up
Glyma.06G310800	CYP727	3.32776	4.70419e-06	2.11657	0.0662268	3.4583	7.20897e-05	2.73034	0.00255679	1.60474	0.0823807	12.4555	0	1.33541	0.373425	Up
Glyma.07G039800	CYP92	5.60949	8.54294e-08	1.31035	0.572717	0.853084	0.724653	3.01978	0.000505111	1.72736	0.0210427	0.907236	0.666725	0.686685	0.308888	Up
Glyma.07G069500	CYP86	3.80806	0.0116894	4.35824	0.0139578	0.467512	0.137723	0.451066	0.214076	1.97057	0.136033	2.01982	0.00895084	0.839921	0.738231	Up
Glyma.07G083000	CYP76	6.78608	2.18851e-06	5.81471	9.41517e-05	12.702	1.95932e-12	6.33909	1.14748e-11	1.81312	0.0559485	17.7465	0	0.891628	0.717658	Up
Glyma.07G083200	CYP704	39.4738	0.0307124	1.85612	0.461358	372.357	9.82929e-07	38.5039	0.0449528	3.06922	0.135397	2.60298	0.120286	6373.61	1.22125e-15	Up
Glyma.07G083300	CYP704	2.23466	0.00201972	1.72172	0.181683	1.86256	0.0363114	1.91379	0.016002	1.0626	0.768217	4.52228	0	1.20035	0.468563	Up
Glyma.07G089800	CYP736	5.46826	3.61831e-09	8.62114	1.9057e-07	7.71326	1.93126e-07	6.68857	2.74648e-10	7.99661	0	18.9468	0	2.03921	0.0892311	Up
Glyma.07G118200	CYP714	6.51395	0.00313028	3.48145	0.0524502	1.88202	0.279572	8.65921	6.93341e-05	0.174236	0.000107402	0.0549361	0	0.071951	0.00136321	Up
Glyma.07G159800	CYP71	1.58464	0.186819	1.65268	0.290445	2.34324	0.0311358	1.28385	0.54312	1.04586	0.874637	2.48013	0.000345571	1.17101	0.743163	Up
Glyma.08G026900	CYP716	9.62227	0.00236408	32.057	0.00115151	10.7908	0.00181719	59.9633	0.0188231	27.9192	2.75521e-05	4.44482	2.32216e-05	1.53164	0.448271	Up
Glyma.08G125000	CYP716	1.00114	0.996885	1.91852	0.137252	2.65422	0.00290256	1.17841	0.712857	2.44355	0.00044086	8.05829	0	1.51453	0.248711	Up
Glyma.08G125100	CYP716	7.11141	5.46942e-10	22.9298	2.04503e-13	21.4229	5.55112e-15	13.2057	0	13.388	0	18.429	0	2.36676	0.00879163	Up
Glyma.08G140400	CYP736	3.05653	0.0207869	2.59521	0.115233	1.02479	0.960489	2.11992	0.251	2.91525	0.0625603	0.86159	0.679779	0.603938	0.473144	Up
Glyma.08G140500	CYP736	8.43009	1.44329e-15	2.76677	0.0236187	1.26123	0.4635	3.96649	0.000167579	1.70514	0.0595147	4.70793	1.21014e-14	0.906241	0.795402	Up
Glyma.08G140600	CYP736	66.6925	0	6.45909	0.000297567	1.42228	0.480855	3.63732	0.0843356	13.6039	0	12.3695	0	3.784	0.0260615	Up
Glyma.08G193900	CYP90	2.0984	0.00160105	1.42303	0.343163	1.53476	0.146148	2.30491	0.00501218	1.67795	0.0136467	2.68662	7.24792e-10	1.32788	0.289198	Up
Glyma.08G250000	CYP85	3.026	0.0621026	0.530658	0.296591	4.71496	0.00843721	6.57302	0.00208973	2.56923	0.0330618	26.956	0	5.75594	0.0175201	Up
Glyma.08G365000	CYP735	3.84549	0.00241899	1.24346	0.684516	1.35079	0.536453	5.73121	0.000129184	2.10628	0.0286017	2.2831	0.0133726	6.31365	0.00283429	Up
Glyma.09G048700	CYP81	3353.83	0	5116.48	0	210.773	0	241.058	0	522.51	0	95.465	0	2.92487	0.0257304	Up
Glyma.09G048900	CYP81	17.4377	0	9.69735	7.10507e-07	2.52554	0.034119	13.3767	8.54872e-15	8.90503	4.74065e-14	3.83853	9.43505e-09	1.06428	0.892548	Up
Glyma.09G049100	CYP81	35.0574	0	4.23831	0.00677495	2.19806	0.167939	12.4674	2.42676e-09	4.71038	5.03385e-09	4.72156	9.38294e-11	1.06791	0.89987	Up
Glyma.09G049200	CYP81	210.16	0	10.967	3.78779e-08	7.58664	1.91622e-06	74.5513	0	6.54347	2.38606e-09	13.3592	0	0.628262	0.366908	Up
Glyma.09G049300	CYP81	39.0806	0	4.64685	0.00459151	3.46142	0.021294	19.0798	2.33147e-15	1.7491	0.0543264	4.81097	1.87418e-08	0.800323	0.602167	Up
Glyma.09G142200	CYP71	4291.81	6.81805e-07	1603.28	0.000112633	979.981	0	305.898	0.000933138	29.4677	0.0396408	760.782	0.000279164	32.1486	0.00665032	Up
Glyma.09G142500	CYP71	2027.1	9.29375e-06	751.014	0.000544069	7154.67	2.35626e-08	180.927	0.00250043	16.8734	0.091539	179.815	2.09799e-08	0.144107	0.3811	Up
Glyma.09G142900	CYP71	0	#N/A	22.6703	0.0931209	76.8128	0.00620727	0.368818	0.383303	5.58316	0.0518966	9.90106	0.0321733	0.321524	0.600789	Up
Glyma.09G186200	CYP736	1.15392	0.641381	3.51055	0.0170683	1.95927	0.0456055	1.23411	0.452016	2.04139	0.00128479	4.26215	2.6712e-13	1.62254	0.102463	Up
Glyma.09G186500	CYP736	1.31791	0.819089	0	#N/A	35.4219	0.0305491	14.8278	0.0374641	0	#N/A	14.642	0.0309715	0.0543611	0.179099	Up
Glyma.09G279100	CYP71	3.01544	0.000121653	0.690154	0.352399	1.1115	0.758518	1.7711	0.313495	0.327816	0.000713172	2.16333	0.000255175	0.545984	0.0711819	Up
Glyma.10G092500	CYP93	12.7809	1.46549e-14	7.00774	2.16743e-06	6.34951	1.2411e-10	7.31956	3.43327e-07	8.37186	9.51239e-13	7.27607	0	1.85923	0.036543	Up
Glyma.10G114600	CYP71	13342.7	6.59994e-09	490.659	0	55.534	0	79.3055	0	79.1756	0	27.4486	0	0.873038	0.664167	Up
Glyma.10G200800	CYP76	4.00736	0.0178586	2.22674	0.201206	1.38302	0.493656	1.92789	0.290149	1.06524	0.876638	0.47807	0.000258147	0.149626	7.52551e-05	Up
Glyma.10G202400	CYP77	9.70443	0.000121927	8.3762	0.0219556	0.786804	0.797718	5.49387	0.00432794	4.95418	0.011595	2.29855	0.21619	4.33775	0.0772657	Up
Glyma.10G203500	CYP76	5.57847	1.7433e-06	2.74194	0.100223	2.68043	0.0066916	1.35803	0.372121	2.20013	0.00849636	0.317251	5.48111e-05	0.125475	1.64918e-05	Up
Glyma.10G234600	CYP715	61.5519	1.11322e-11	1291.93	0.000124661	16.3345	2.74586e-05	149.517	1.60982e-14	56.3662	2.14917e-07	2.98082	0.00202803	0.106948	0.30315	Up
Glyma.10G234700	CYP715	0.733384	0.59499	16.1154	0.0110526	3.2398	0.0676908	1.14382	0.77107	2.45556	0.0201445	2.88819	0.000411119	0.152733	0.0630151	Up
Glyma.11G051800	CYP81	436.598	0	37.7252	6.68354e-14	4.80059	6.05193e-05	22.5296	1.7818e-08	14.8406	0	6.36278	0	2.47746	0.126318	Up
Glyma.11G060200	CYP82	15.2071	1.56075e-06	10.8645	0.000222316	5.41682	0.0010934	8.21921	0.00109211	9.17736	1.43686e-05	7.44331	2.55022e-07	1.04424	0.956101	Up
Glyma.11G062500	CYP71	439.715	0	345.563	0	3.20027	0.0147514	39.0401	2.96455e-10	388.865	0	5.57586	1.66533e-15	1.16645	0.804643	Up
Glyma.11G062600	CYP71	135.917	0	19.698	2.19279e-07	1.34513	0.576084	14.3563	1.53318e-06	21.6127	0	4.00117	3.07783e-09	1.04034	0.937891	Up
Glyma.11G100100	CYP86	17.2108	1.73598e-06	145.729	1.38334e-13	0.292775	0.00227196	2.91782	0.0939194	57.1968	6.81435e-11	0.480376	0.000445493	0.906542	0.77264	Up
Glyma.11G168428	CYP83	2.71891	0.000952825	3.61905	0.00218304	7.42335	1.75456e-07	1.92884	0.0348644	2.57537	0.000210389	18.7302	0	6.6335	0.000517816	Up
Glyma.11G175900	CYP86	52.2813	4.00119e-09	277.406	1.19273e-07	0.389334	0.0574526	0.310619	0.123389	59.8655	7.19036e-12	0.681282	0.0981178	1.53918	0.216004	Up
Glyma.11G197300	CYP79	0	#N/A	3.8158	0.487319	3.92883	0.205457	8.29119	0.0318337	25.1399	0.048568	7.725	0.0139998	0	#N/A	Up
Glyma.12G239100	CYP712	10.5586	0.0293079	2.88582	0.138268	101.956	1.56355e-05	35.956	3.38568e-05	142.219	0	55.2195	1.11022e-16	3.12683	0.128624	Up
Glyma.13G051600	CYP79	0.0979343	0.000250654	0.28043	0.473539	13.321	0.000373644	2.57276	0.135278	3.98287	0.00969748	2.61667	0.00213493	0.0268416	0.0896866	Up
Glyma.13G072100	CYP75	7.58825	6.18736e-11	13.0617	2.81938e-08	3.0455	0.0177793	3.47457	0.0126717	12.9479	8.90981e-10	13.34	7.51799e-09	1.36933	0.676781	Up
Glyma.13G120500	CYP94	3.31124	0.0111085	19.5178	8.04495e-06	27.2631	5.93419e-07	1.75339	0.359483	0.796416	0.648708	0.804691	0.657467	0.924398	0.90941	Up
Glyma.13G173401	CYP93	8.89339	3.79593e-10	3.09855	0.0521891	0.447292	0.118051	3.13387	0.0161103	0.904446	0.70945	0.860881	0.50728	0.412445	0.0551866	Up
Glyma.13G173500	CYP93	5.81173	2.34946e-08	2.28199	0.1579	0.393519	0.0869412	3.13501	0.0106646	0.73705	0.260013	0.699394	0.190698	0.448081	0.170564	Up
Glyma.13G217400	CYP710	2.30065	0.00375486	1.76034	0.164781	1.30872	0.503682	1.41932	0.331782	1.69317	0.00653532	2.63391	5.10605e-05	1.15279	0.714256	Up
Glyma.13G262000	CYP72	11.0434	5.55112e-16	7.67558	1.80617e-05	2.80106	0.00227027	4.79604	7.90731e-06	1.7806	0.0163314	4.80411	0	0.986486	0.963909	Up
Glyma.13G262100	CYP72	1.52146	0.314839	1.647	0.384015	1.07776	0.85966	2.3371	0.0961606	1.95532	0.11133	2.31889	0.010437	1.01226	0.982765	Up
Glyma.13G265300	CYP76	15.8595	2.14748e-07	2.96727	0.0631203	0.409537	0.0657169	2.31263	0.119493	0.106431	3.10935e-08	0.223922	2.53898e-08	0.113112	0.0505134	Up
Glyma.13G277100	CYP72	3.93117	2.36655e-08	1.5239	0.281866	1.29957	0.388542	2.53904	0.00146535	1.37431	0.109692	1.97945	0.000129363	0.91814	0.783922	Up
Glyma.13G285300	CYP82	38.4054	0	23.1046	1.0618e-07	0.971498	0.955876	9.53911	2.24733e-06	5.9056	5.34325e-11	1.23794	0.39853	0.30523	0.00558703	Up
Glyma.14G015100	CYP71	606.407	2.54075e-12	24.7837	9.94275e-09	7.70326	6.13044e-07	20.9393	8.61399e-09	18.3657	4.26678e-10	11.4555	0	1.94124	0.334707	Up
Glyma.14G117200	CYP71	0.76521	0.815666	6.99792	0.101117	27.0146	4.09171e-05	1.70269	0.588725	1.24845	0.825305	28.0035	1.68706e-06	15.6553	0.000275955	Up
Glyma.14G192500	CYP86	14.3667	4.1373e-05	67.4899	1.33598e-07	0.14411	3.95178e-05	0.160975	0.0131168	88.9539	7.74913e-10	0.324215	3.56368e-08	0.908048	0.734267	Up
Glyma.15G050300	CYP71	13.8255	0.0126784	1.77867	0.575003	281.602	1.25551e-07	31.0968	0.000320833	179.287	6.29508e-12	220.708	0	13.516	0.000818385	Up
Glyma.15G156100	CYP81	8083.93	0	26.6091	3.48912e-11	14.8582	1.8511e-06	142.253	1.56881e-11	38.7112	0	35.4666	0	0.61868	0.334082	Up
Glyma.15G203500	CYP82	51946.5	3.11348e-11	1631.44	0	87.6861	0	359.575	0	3553.01	0	45.2041	0	12.7685	0.000419971	Up
Glyma.15G244250	CYP72	7.38436	2.99031e-11	5.28182	0.000101423	3.79434	0.000185454	3.90478	5.61486e-06	3.37682	1.563e-06	5.87604	0	1.7002	0.0936096	Up
Glyma.15G245300	CYP72	1.51545	0.408831	3.90535	0.00530724	1.41715	0.37847	2.43748	0.18461	7.10723	6.08218e-08	27.3375	0	3.99013	0.05926	Up
Glyma.16G008600	CYP92	4.04089	2.91445e-05	2.63638	0.0499886	0.852876	0.762962	2.31549	0.0146475	2.74552	2.20926e-05	0.67388	0.119039	0.80387	0.56329	Up
Glyma.16G068100	CYP724	4.43341	0.0553489	2.78685	0.24277	2.00668	0.507984	19.2165	0.00512642	0.675399	0.626561	0.343263	0.303987	4.38131	0.23349	Up
Glyma.16G090000	CYP82	330.546	0	22.1909	6.76927e-07	3.91312	0.00019807	11.6187	1.1962e-05	3.78318	6.04074e-05	1.19268	0.388827	0.476405	0.0205218	Up
Glyma.16G131200	CYP84	1.52859	0.105694	0.959875	0.927512	5.17585	2.61024e-06	2.42026	0.0032118	0.948832	0.804556	4.74702	7.00107e-13	2.55898	0.0132778	Up
Glyma.16G149300	CYP81	3.68938	2.16903e-07	1.29584	0.482186	1.41834	0.307033	3.32153	3.34394e-05	1.54608	0.0402905	4.77064	0	1.58771	0.142609	Up
Glyma.16G195500	CYP71	0	#N/A	6.50964	0.313975	521.503	5.11478e-06	10.356	0.181268	3.88201	0.434739	0	#N/A	0	#N/A	Up
Glyma.16G195600	CYP71	617.247	0	41.393	4.74065e-13	6.5515	3.89507e-05	38.0054	1.06581e-14	11.3254	5.65881e-13	12.2815	0	1.5166	0.438171	Up
Glyma.17G015400	CYP77	1.26841	0.425086	3.96215	0.000363535	1.74471	0.117394	0.888276	0.745483	3.1411	1.16003e-06	2.26031	0.000388823	1.50671	0.264584	Up
Glyma.17G077700	CYP75	0.8473	0.769492	1.28571	0.656955	11.6812	9.30417e-06	3.17481	0.108382	1.44587	0.470532	13.4938	1.99085e-12	3.01202	0.0403797	Up
Glyma.17G125400	CYP71	43.8542	9.85878e-14	131.309	0	302.047	0	43.6415	4.44089e-15	28.2748	0	345.957	0	41.3581	3.51519e-11	Up
Glyma.17G227500	CYP711	13.0111	3.33067e-16	2.22555	0.212593	1.43777	0.395818	9.80157	2.37122e-06	0.633931	0.21123	1.97945	0.0147773	0.774335	0.510627	Up
Glyma.17G246500	CYP74	1.82737	0.0741717	12.0169	4.20683e-06	1.51556	0.3331	1.31249	0.429421	0.765301	0.301353	0.547503	0.0270531	0.686613	0.212565	Up
Glyma.17G255900	CYP83	57.4813	0	17.5346	3.44169e-13	5.24941	9.2541e-08	18.3426	2.68674e-14	5.55062	6.83587e-12	7.95627	0	1.63375	0.0663855	Up
Glyma.18G052400	CYP728	1.42773	0.220966	1.132	0.783172	1.35018	0.422545	1.24485	0.502683	1.09742	0.71347	2.99564	6.41864e-08	1.30516	0.407892	Up
Glyma.18G080300	CYP71	8.3924	5.32492e-10	5.44794	0.000250745	33.7772	0	3.62546	0.000443221	2.69889	0.000780627	23.9746	0	8.79797	9.02738e-05	Up
Glyma.18G080400	CYP71	4323.7	0	1204.14	0	785.115	0	1619.99	0	1102.46	1.11022e-15	37.9513	0	9.06117	0.00588651	Up
Glyma.18G218600	CYP714	11.5823	0	2.56593	0.0483111	2.03273	0.0217049	3.74178	0.00232882	5.92321	6.77904e-10	5.01766	0	1.65396	0.146068	Up
Glyma.18G223100	CYP76	58.0463	2.19247e-12	10.2598	9.73761e-05	24.8282	1.03148e-08	376.09	0.000415473	33.2	1.20521e-08	28.4439	6.70615e-11	2.29086	0.395763	Up
Glyma.18G297200	CYP735	0.924573	0.826769	0.646738	0.366982	0.893475	0.784263	1.19866	0.667804	0.839155	0.565488	1.03094	0.920554	2.36021	0.0296769	Up
Glyma.19G003600	CYP96	0.362559	0.0198194	2.65885	0.0415372	0.359245	0.00380294	1.07574	0.84273	1.77373	0.202998	6.38227	5.94427e-06	0.414453	0.0486819	Up
Glyma.19G015200	CYP82	1.15198	0.846717	4.97972	0.138205	10.1628	0.00367587	12.4708	0.00889387	36.2518	2.14695e-12	40.4429	0	6.29562	0.0128422	Up
Glyma.19G015300	CYP82	0.146738	0.290481	0.36856	0.41178	9.7645	0.0147284	118.515	0.0068951	3.69094	0.0101146	10.867	5.35564e-08	15.5195	0.00843767	Up
Glyma.19G126000	CYP98	2.45536	0.000743397	0.837431	0.690779	0.595728	0.144515	2.09789	0.0102629	1.92792	0.00111343	1.7069	0.00395532	1.36104	0.309709	Up
Glyma.19G144700	CYP93	69.396	0	3.17472	0.00386186	2.73415	0.0331241	20.1291	3.098e-11	9.27051	0	5.89532	9.99201e-16	0.947897	0.878366	Up
Glyma.19G146800	CYP93	164.344	7.01139e-12	36.4077	5.89735e-08	5.24089	9.0254e-05	31.3273	5.43443e-10	35.8296	2.5615e-05	8.54701	2.65066e-11	2.81907	0.133882	Up
Glyma.19G162100	CYP94	9.2065	2.44299e-08	7.71777	2.12175e-05	3.11344	0.00172621	5.513	1.5309e-06	5.35703	1.79445e-12	1.49882	0.0799956	5.57747	0.00658158	Up
Glyma.19G258700	CYP78	0.500778	0.0278543	0.685529	0.53171	2.07938	0.110443	0.517988	0.162742	5.05088	9.60844e-08	12.522	2.20934e-14	2.8707	0.0525378	Up
Glyma.20G007000	CYP71	1.08952	0.849491	0.130023	0.001375	0.967222	0.950433	1.11284	0.853367	0.471407	0.13842	2.10787	0.14231	1.10523	0.887224	Up
Glyma.20G007100	CYP71	2.69934	0.00409067	0.491861	0.275507	0.902128	0.771401	1.92147	0.0710284	0.424605	0.00456095	1.16333	0.510045	1.24851	0.496708	Up
Glyma.20G018800	CYP89	11.2769	8.90399e-14	0.776871	0.664917	1.36681	0.375529	2.30413	0.147961	3.66184	5.0433e-05	7.8422	6.66134e-16	2.04969	0.0982005	Up
Glyma.20G114200	CYP73	32.5198	0	1.61312	0.279693	1.14065	0.763146	5.21289	1.29682e-05	4.78626	8.25527e-09	1.44519	0.128091	0.573402	0.0637406	Up
Glyma.20G148000	CYP76	1.47397	0.281872	2.53574	0.0971794	3.77155	0.00367946	0.72035	0.452883	1.64575	0.135237	2.21502	0.0328002	0.519463	0.232103	Up
Glyma.20G159700	CYP715	71.9033	2.23294e-10	4389.97	8.61806e-06	19.5969	1.74915e-07	21.6372	1.1959e-09	9.4415	7.26353e-05	1.77008	0.064644	51.2161	0.00148955	Up
Glyma.05G220500	CYP716	0.830009	0.758617	1.38522	0.642443	5.55522	0.00160437	0.366658	0.165786	1.86555	0.165863	0.567641	0.0462764	0.755239	0.53838	Up/Down
Glyma.11G197400	CYP79	0	#N/A	0	#N/A	172.475	0.00194819	16.5272	0.100713	15.8028	0.109812	32.234	0.000332873	0.694177	0.770342	Up/Down
Glyma.13G052900	CYP85	0.978548	0.958141	1.38667	0.597845	0.501297	0.11112	1.58854	0.238493	2.28023	0.00455221	0.587284	0.0807702	1.42729	0.369754	Up/Down
Glyma.16G076600	CYP707	2.6281	0.0862686	0.896105	0.842728	1.1661	0.750545	3.18553	0.0510038	1.09424	0.820326	0.797157	0.683916	0.416215	0.293145	Up/Down
Glyma.20G147900	CYP76	0.266182	0.00344341	1.26104	0.701709	2.85014	0.0123216	0.553021	0.142513	1.16636	0.628671	0.708195	0.342679	0.281905	0.0176209	Up/Down

## Sheet: PRJNA210431
PRJNA210431		Fold Change (inoculated over mock)											Differential gene expression while controlling for genotype
Gene Id	GmP450 family	Inoculated - Rps1-a	Inoculated - Rps1-b	Inoculated - Rps1-c	Inoculated - Rps1-k	Inoculated - Rps3-a	Inoculated - Rps3-b	Inoculated - Rps3-c	Inoculated - Rps4	Inoculated - Rps5	Inoculated - Rps6	Inoculated - Williams	Fold change	P-value	Up or Down regulation
Glyma.01G061100	CYP78	0.391664	0.396934	0.532269	0.476578	0.335606	0.37819	0.345268	0.355366	0.337326	0.339644	0.404796	0.420429	0	Down
Glyma.01G112400	CYP94	0.159055	0.270923	0	0.540122	1.34999	1.08129	0.127585	0.673625	0.194431	0.262162	0	0.381607	0.000809852	Down
Glyma.01G181900	CYP82	0.556691	0.180615	0	0	0.168748	0.10012	0.198465	0.378914	0.299125	1.04865	0.0717067	0.276367	4.01931e-07	Down
Glyma.03G030600	CYP83	0.245084	0	0.436632	0.288414	0.358692	0.235458	0.222067	0.325395	0.218857	0.293005	0.259433	0.304539	0	Down
Glyma.03G030800	CYP83	0.799015	0.194675	0.365953	0.814839	0.436171	0.410041	0.358193	0.412714	0.342055	0.394595	0.269502	0.433518	0	Down
Glyma.03G030900	CYP83	0.339676	0.406385	0.35386	0.243055	0.185909	0.207941	0.105635	0.217298	0.0821985	0.21424	0.406338	0.230574	0	Down
Glyma.05G019200	CYP78	0.185564	0.494729	0.468183	0.578702	0.337497	0.22527	0.51034	0.505219	0.129621	0.734055	0.920236	0.467368	2.17845e-05	Down
Glyma.06G140000	CYP714	0.411467	0.225075	0.235485	0.231481	0.202925	0.220264	0.219061	0.102179	0.211486	0.493482	0.234782	0.264281	0	Down
Glyma.06G176200	CYP71	0.535783	0.489299	0.576248	0.650146	0.362496	0.411475	0.305067	0.310436	0.255012	0.399486	0.484179	0.45765	0	Down
Glyma.07G089700	CYP736	0.278346	0.325108	1.0144	0	0.306815	0.450539	0	0	0.233317	0.62919	1.25487	0.412437	0.000510351	Down
Glyma.10G200800	CYP76	0.520856	0.39747	0.37267	0.508235	0.255223	0.319732	0.240883	0.239307	0.254459	0.364052	0.569916	0.384651	0	Down
Glyma.11G122700	CYP74	0.305881	0.413975	0.47784	0.419891	0.298624	0.286822	0.23156	0.258107	0.25323	0.398598	0.309793	0.354611	0	Down
Glyma.12G067000	CYP93	0.312084	0.519439	0.209219	0.347505	0.359039	0.144173	0.280476	0.533816	0.358363	0.240801	0.278859	0.346117	0	Down
Glyma.13G072100	CYP75	0.256298	0.183331	0.362528	0.37311	0.295186	0.105871	0.301982	0.35617	0.34982	0.317107	0.392146	0.315435	0	Down
Glyma.13G120500	CYP94	0.390712	0.317038	0.327518	0.330522	0.293051	0.261011	0.273354	0.24229	0.271085	0.379652	0.321883	0.334227	0	Down
Glyma.15G002200	CYP701	0	0.0677308	0.1902	0	1.09686	0	0.111637	0.118875	0.207393	0	1.50584	0.180522	7.4635e-09	Down
Glyma.15G135200	CYP88	0.35873	0.384464	0.321813	0.278634	0.404226	0.314423	0.310171	0.581853	0.481407	0.636727	0.409515	0.435074	0	Down
Glyma.15G243300	CYP72	0.76785	0.35239	0.310088	0.574882	0.356633	0.393328	0.270386	0.383966	0.463492	0.244422	0.310989	0.419321	0	Down
Glyma.16G089900	CYP82	0.278346	0.487662	2.53599	0	0	0	0.446547	0	0.33331	1.04865	0	0.338125	0.000116044	Down
Glyma.16G133800	CYP722	0.668029	0	0.169066	0.540122	0.674993	0.15018	0.893095	0.202088	0.31109	3.14595	0.250973	0.463773	0.00511067	Down
Glyma.17G080500	CYP78	0.371127	0	0.380399	0.675152	0	0.212018	0.137399	0.0631524	0.0864138	0.190664	0.836578	0.201541	1.42944e-09	Down
Glyma.17G134100	CYP706	0.351144	0.512214	0.499366	0.556826	0.392438	0.407895	0.350983	0.447606	0.456134	0.714989	0.391189	0.496897	0	Down
Glyma.18G028300	CYP90	0.338855	0.28686	0.179011	0.675152	0.210935	0.474252	0.476317	0.378914	0.409329	0.589866	0.543776	0.44717	1.36632e-07	Down
Glyma.18G052400	CYP728	0	0.270923	0	0	0.241069	0	0.178619	0.168406	0.141404	0.149807	0.75292	0.230092	1.67062e-06	Down
Glyma.18G272300	CYP85	0.618546	0.361231	0.179011	0.360081	0.306815	0.112635	0.31521	0.505219	0.59473	0.182374	0.958262	0.463534	3.1186e-05	Down
Glyma.19G033900	CYP85	0.371127	0.325108	0.608638	0	0.337497	0.210252	0.446547	0.202088	0.163731	0.224711	3.01168	0.399587	4.9212e-05	Down
Glyma.19G057300	CYP96	0.6804	0.437645	0.46109	0.594134	0.34615	0.415882	0.259286	0.486507	0.398347	0.358749	0.295263	0.457534	7.33835e-12	Down
Glyma.20G007000	CYP71	0.58425	0.617293	0.559219	0.393292	0.546307	0.447388	0.349472	0.493331	0.296813	0.434806	0.484835	0.496424	0	Down
Glyma.20G018600	CYP89	0.303009	0.349942	0.503627	0.356684	0.296939	0.234527	0.0772573	0.205089	0.173165	0.239826	0.218059	0.269615	0	Down
Glyma.01G135200	CYP82	134.897	104.005	214.145	107.171	171.936	289.673	238.084	104.755	57.6528	41.8277	145.258	134.816	0	Up
Glyma.01G153300	CYP707	0.855927	1.7889	2.02686	3.23663	6.38752	8.63726	3.60078	4.73924	5.97844	3.32602	0.26661	3.12257	1.33234e-10	Up
Glyma.01G179600	CYP71	27.8346	9.21139	22.8239	9.90223	14.0624	16.2194	0	22.2296	5.99959	4.34441	8.36578	11.4678	0	Up
Glyma.01G179700	CYP71	0	0	0	0	0	1.35162	0	2.02088	3.1109	3.14595	1.00389	3.32029	0.000879271	Up
Glyma.01G181800	CYP82	4.13189	8.46991	3.18811	1.90043	6.27397	4.01261	3.79944	2.98486	2.24031	2.62162	7.30213	4.13891	0	Up
Glyma.02G156000	CYP71	9.64931	9.75323	39.5615	14.1782	8.09992	30.6367	8.93095	7.40988	5.75516	5.24325	16.3133	10.311	0	Up
Glyma.03G020400	CYP704	0.890706	0	1.5216	0	2.95309	1.80216	2.23274	2.02088	4.66635	0.20973	0	2.26446	0.0072618	Up
Glyma.03G021600	CYP704	2.07494	3.01886	3.42359	6.30142	1.85623	1.5249	2.14343	2.86291	4.86078	1.67784	2.56551	2.60275	7.4315e-12	Up
Glyma.03G142100	CYP93	4.39594	12.8011	9.84282	6.17282	21.7263	17.2938	17.6944	14.843	10.7382	9.77612	5.79169	11.5516	0	Up
Glyma.03G143700	CYP93	12.6991	13.802	18.1559	13.2879	18.6239	22.4495	15.2932	13.8226	10.637	8.63627	14.8896	15.6341	0	Up
Glyma.03G160100	CYP94	2.78346	8.94046	7.60798	0.810182	0	0	16.0757	0	14.7768	12.5838	34.6343	12.6084	2.22045e-16	Up
Glyma.03G160200	CYP94	2.35047	27.6342	8.52094	2.57785	8.01554	7.74927	6.25166	7.67933	7.77724	3.14595	4.83694	6.05309	0	Up
Glyma.05G010200	CYP734	3.34015	1.62554	1.0144	0	1.68748	3.60431	1.33964	0	0	4.1946	0	2.92322	0.000946237	Up
Glyma.05G021900	CYP75	2.55	1.79287	2.78959	2.19424	3.65621	1.72707	1.84381	1.97035	2.05992	3.58289	0.939815	2.32694	7.77156e-16	Up
Glyma.05G022100	CYP75	30.0613	12.1915	26.2475	37.1334	18.5623	8.49588	26.3463	7.63442	7.77724	3.42191	26.9378	13.2629	0	Up
Glyma.05G042800	CYP71	1.39173	1.36258	1.29105	1.96408	2.73489	3.0465	1.7246	2.93946	3.20517	2.84009	2.03169	2.377	2.22045e-16	Up
Glyma.05G147100	CYP78	3.34015	4.06385	0	2.02546	0	0	0	3.70494	3.88862	3.35568	13.0506	6.67988	1.08847e-11	Up
Glyma.06G035300	CYP82	1.14193	1.65176	1.79994	1.38888	3.07299	2.84483	3.90214	3.13909	2.94274	2.80514	1.83295	2.49516	0	Up
Glyma.07G010700	CYP90	2.67212	1.95065	1.82592	0.675152	0.843741	12.6151	3.12583	0.673625	1.03697	2.88379	5.01947	2.03406	0.000697924	Up
Glyma.07G089800	CYP736	3.1121	2.52618	2.81495	2.41633	2.45786	2.92139	4.21497	3.27877	3.14946	3.23714	4.98412	3.49733	0	Up
Glyma.07G089900	CYP736	1.67007	1.21915	0.760798	0.675152	1.26561	3.60431	1.33964	0	4.27748	7.34055	2.00779	2.4373	0.000909614	Up
Glyma.07G202300	CYP93	2.77551	3.32775	2.98817	2.09841	3.52664	4.09325	4.55184	4.03895	3.99359	3.84198	3.3329	3.77657	0	Up
Glyma.08G140600	CYP736	9.69297	13.6447	19.0785	7.0891	22.6214	20.8535	13.4708	8.20759	10.8881	7.24068	10.144	12.9529	0	Up
Glyma.08G193900	CYP90	3.09273	1.95065	1.93658	1.50034	2.60793	5.06856	0.803785	1.22696	1.47358	2.16721	2.82345	2.18172	5.06538e-08	Up
Glyma.09G048700	CYP81	0	36.1682	37.2791	31.057	23.6248	0	16.9688	60.6263	13.999	9.43785	24.2608	31.2575	0	Up
Glyma.09G048900	CYP81	119.132	59.8198	0	80.3431	295.309	392.42	501.026	60.514	38.2566	24.069	73.0691	95.3498	0	Up
Glyma.09G049100	CYP81	26.3282	14.2815	37.2099	13.9853	20.8367	30.4114	26.4951	14.2584	7.50742	6.56546	14.8978	17.3579	0	Up
Glyma.09G049200	CYP81	90.8202	28.6822	140.402	63.9553	73.4311	165.471	38.2021	32.1359	17.187	14.7428	31.0989	48.6382	0	Up
Glyma.09G049300	CYP81	151.049	184.905	263.236	39.1588	167.483	637.963	95.5611	47.3643	21.2745	19.2952	113.512	81.2361	0	Up
Glyma.09G160900	CYP720	0	0	1.5216	0	1.12499	1.80216	4.01893	1.01044	1.94431	2.0973	0.501947	2.29262	0.00484984	Up
Glyma.10G092500	CYP93	4.45353	2.43831	1.268	1.80041	3.79684	3.15377	2.29653	1.91983	1.49064	1.12355	3.51363	2.3593	1.56427e-07	Up
Glyma.10G203500	CYP76	12.2472	7.77936	11.3672	8.19184	9.42178	7.29054	8.43478	4.62846	3.62938	3.47365	8.83984	7.37791	0	Up
Glyma.11G051800	CYP81	7.62287	6.28729	10.3957	8.47508	10.3142	8.87176	6.67508	5.66435	6.40309	4.1591	13.5659	8.34348	0	Up
Glyma.11G062500	CYP71	65.272	63.338	127.138	91.5956	92.8116	148.002	90.938	55.5415	43.1123	17.4338	65.7341	70.6357	0	Up
Glyma.11G062600	CYP71	24.4682	16.7574	37.4844	24.5438	29.8961	39.2675	20.0711	19.3489	12.5453	9.3803	26.4598	23.6486	0	Up
Glyma.11G185700	CYP94	0.681387	2.21275	2.44169	2.33312	4.67582	8.26842	3.05049	4.89822	5.20503	2.88735	0.223052	2.85068	3.17453e-09	Up
Glyma.12G087200	CYP94	0.53033	1.88496	2.1116	2.35421	4.99377	6.28796	3.28851	5.45761	4.72291	2.47957	0.228406	2.65732	5.3851e-08	Up
Glyma.13G068800	CYP82	16.8863	16.2102	35.1658	6.4338	44.437	38.2958	34.5155	22.7737	9.60834	8.74697	23.6417	20.6627	0	Up
Glyma.13G173401	CYP93	0	25.7975	12.8389	3.75192	0	11.6517	24.0693	38.8816	5.15259	20.9675	54.6249	29.9227	0	Up
Glyma.13G173500	CYP93	6.20785	7.95971	14.9102	7.61112	13.1076	14.294	11.0761	11.0311	12.2101	7.03435	11.612	11.2327	0	Up
Glyma.13G217400	CYP710	2.92263	1.84615	2.64524	3.67958	2.6767	2.02743	3.76106	2.56255	2.18286	1.93223	5.31227	2.96282	0	Up
Glyma.13G265300	CYP76	0	2.43831	0	0	0	0	0	4.54697	3.88862	1.83514	0	7.95757	2.52135e-08	Up
Glyma.13G285300	CYP82	15.2306	14.8879	21.0088	18.8012	24.9433	34.0094	25.0622	17.1318	15.0451	10.2358	17.3588	20.2054	0	Up
Glyma.14G015100	CYP71	7.49003	7.23365	4.90292	5.13115	5.7053	4.95593	3.39376	3.65682	2.75356	2.71994	5.7281	4.722	0	Up
Glyma.15G156100	CYP81	125.144	75.0651	237.749	72.0725	169.796	385.391	125.986	106.096	42.379	28.9519	99.0466	109.706	0	Up
Glyma.15G203500	CYP82	31.1747	19.3541	8.26954	18.7815	30.445	18.3369	16.9688	9.81568	27.0043	6.20687	18.8983	17.6044	0	Up
Glyma.15G245300	CYP72	5.19578	2.43831	2.78959	9.45213	5.06245	6.90827	6.02839	17.6827	34.9976	4.1946	0.439203	5.59771	1.44329e-14	Up
Glyma.16G008600	CYP92	1.84641	1.67524	1.50478	1.15914	2.18426	2.33722	2.22089	2.24816	2.48596	2.02393	2.12141	2.13481	0	Up
Glyma.16G090000	CYP82	2.11543	1.95065	1.5216	1.3503	4.72495	2.97356	2.79092	6.39944	2.5276	1.25838	6.35799	2.75566	1.05081e-10	Up
Glyma.16G182600	CYP715	3.34015	4.06385	0	1.3503	6.74993	6.30755	0	2.02088	0	1.04865	0.75292	4.26248	5.79284e-05	Up
Glyma.16G195600	CYP71	127.853	77.4453	763.841	0	427.496	540.647	141.109	48.6606	48.4678	47.7718	119.112	121.205	0	Up
Glyma.17G227500	CYP711	3.00129	3.87982	3.85646	2.01538	5.36533	6.46801	9.55852	3.85691	5.88848	2.37488	5.30629	4.6648	0	Up
Glyma.18G049500	CYP714	2.22676	0	2.28239	0	0	3.60431	1.78619	0	1.55545	1.04865	1.25487	2.17228	0.0214209	Up
Glyma.18G080300	CYP71	1.91962	1.69943	2.02879	1.14776	2.27161	1.80216	2.63463	2.41382	1.97209	0.898843	5.67586	2.19063	1.40196e-11	Up
Glyma.18G223100	CYP76	2.83406	6.90854	1.32313	5.17617	8.67848	1.74208	11.3125	3.53653	5.57369	4.06352	4.23069	4.10217	0	Up
Glyma.19G014600	CYP82	1.11338	0	0	1.3503	0	9.91186	6.25166	2.6945	5.70331	1.83514	5.77239	4.2354	5.94122e-09	Up
Glyma.19G090800	CYP94	4.82466	0	18.2592	0	0	0	0	4.37856	15.5545	12.5838	3.89009	9.16807	9.18154e-14	Up
Glyma.19G144700	CYP93	4.78517	4.49055	4.50268	3.04907	4.19058	2.77048	3.09058	2.87906	2.25012	2.70901	5.50211	3.82354	0	Up
Glyma.19G146800	CYP93	7.79368	0	11.6656	3.60081	3.79684	15.0931	42.8685	28.2923	8.94383	9.58766	0	13.953	0	Up
Glyma.19G162100	CYP94	1.32274	1.6594	3.18293	2.09599	3.47521	6.03401	3.38689	2.3775	4.71819	3.70743	3.50915	3.2626	0	Up
Glyma.20G114200	CYP73	17.3217	11.792	15.4654	12.1527	5.61549	20.3439	17.4337	17.416	8.65753	8.29041	19.5053	14.2031	0	Up
Glyma.20G147900	CYP76	14.474	6.23123	0	5.40122	12.9374	11.714	19.2015	8.0835	15.1656	6.55406	13.8872	12.4357	0	Up
Glyma.20G148000	CYP76	8.90706	8.94046	28.9103	5.40122	16.3123	20.7248	17.8619	5.389	6.22179	4.54415	0	11.1352	0	Up
Glyma.20G159700	CYP715	0	0	6.08638	0	0	1.80216	0	9.09394	0	9.43785	1.00389	6.77776	2.78004e-06	Up

## Sheet: PRJNA318321
PRJNA318321
		Fold Change in Williams82 cultivar (induction over mock) at hours post inoculation (hpi)				Up or Down regulation
Gene Id	GmP450 Family	0.5hpi	3hpi	6hpi	12hpi
Glyma.19G144600	CYP712	0.048045	0.372972	0.228751	0.147692	Down
Glyma.18G218600	CYP714	0.270339	0.364147	0.610627	0.814541	Down
Glyma.10G234700	CYP715	2.22748	0.0548856	0.110443	1.41659	Down
Glyma.18G052400	CYP728	0.0929291	0.297292	0.283369	0.113076	Down
Glyma.06G176200	CYP71	0.32851	0.623352	0.290356	0.239839	Down
Glyma.09G279100	CYP71	0.217018	0.876969	0.339819	0.269166	Down
Glyma.20G007100	CYP71	0.208161	0.751053	0.342562	0.206768	Down
Glyma.18G080200	CYP71	0.153443	0.0899093	0.0811018	0.0320074	Down
Glyma.20G007000	CYP71	0.148687	3.00421	0.654897	0.155076	Down
Glyma.18G080300	CYP71	0.0472021	0.286115	1.05551	2.95383	Down
Glyma.09G117400	CYP721	0.329008	0.473003	0.403014	0.541117	Down
Glyma.08G365000	CYP735	0.0826036	0.834503	0.419806	0.25846	Down
Glyma.18G297200	CYP735	0.107161	1.10966	0.535536	0.111767	Down
Glyma.08G104100	CYP78	2.57723	0.761067	0.362712	1.24061	Down
Glyma.13G068500	CYP82	0.232323	0.453761	0.456539	0.145384	Down
Glyma.16G090000	CYP82	0.090113	0.364147	0.183188	2.34964	Down
Glyma.19G014700	CYP82	0.0222751	0.461321	0.588671	0.278788	Down
Glyma.03G030800	CYP83	0.330414	0.222534	0.615627	0.615627	Down
Glyma.03G031000	CYP83	0.0132166	0.667602	0.483616	0.482459	Down
Glyma.11G026200	CYP87	0.354015	0.262272	0.407811	0.172307	Down
Glyma.15G135200	CYP88	0.301006	0.676341	0.801807	0.346418	Down
Glyma.02G057500	CYP90	3.22154	0.250351	0.503767	0.51692	Down
Glyma.03G122300	CYP94	0.247029	0.8245	0.6897	0.733799	Down
Glyma.18G239900	CYP97	1.64721	0.854138	0.474134	0.623345	Down
Glyma.03G189900	CYP76	0.34478	0.290262	0.401553	0.104882	Down
Glyma.08G140500	CYP736	0.187533	1.02847	1.71553	2.03974	Down
Glyma.17G134100	CYP706	0.216834	0.97011	0.587728	0.12923	Down
Glyma.17G134200	CYP706	0.371716	0.328586	0.488024	0.193845	Down
Glyma.07G218200	CYP706	0.17239	0.653089	0.438058	0.0898992	Down
Glyma.19G144700	CYP93	0.138056	0.591358	1.04963	2.00145	Down
Glyma.10G092500	CYP93	0.193691	0.28776	0.243198	0.819943	Down
Glyma.10G092600	CYP93	0.0741117	0.0187178	0.0094162	0.167831	Down
Glyma.13G261700	CYP72	0.291324	1.01013	0.877044	0.327018	Down
Glyma.15G245300	CYP72	0.925552	0.296096	0.0313587	0.0482663	Down
Glyma.02G290000	CYP728	0.302413	0.958971	0.606228	0.376739	Down
Glyma.15G243300	CYP72	0.214802	1.62952	0.687046	0.162373	Down
Glyma.13G262100	CYP72	0.270339	0.864849	1.23652	1.08083	Down
Glyma.09G049100	CYP81	0.261991	0.52219	1.84554	1.93599	Down
Glyma.16G149300	CYP81	0.333263	0.975505	0.746965	2.29049	Down
Glyma.09G218600	CYP707	18.2089	0.530155	0.372534	1.56379	Down
Glyma.06G310800	CYP727	0.30657	1.03237	1.38146	1.36424	Down
Glyma.09G282900	CYP707	0.571871	0.0385155	0.193757	2.36453	Down
Glyma.06G140000	CYP714	0.51599	0.772773	0.354247	0.217154	Down
Glyma.06G176100	CYP71	0.805385	0.312939	0.314854	0.581535	Down
Glyma.02G156000	CYP71	0.0987756	1.44693	3.56416	1.54531	Down
Glyma.03G029900	CYP83	0.401171	0.0905001	0.169242	0.15335	Down
Glyma.07G089700	CYP736	0.644308	0.350491	0.100753	0.155076	Down
Glyma.07G258800	CYP77	0.842557	0.600842	0.201507	0.361844	Down
Glyma.17G080500	CYP78	0.954978	0.274775	0.380897	0.0126078	Down
Glyma.07G052300	CYP78	1.03076	0.289442	0.281172	0.0480856	Down
Glyma.01G216900	CYP87	0.815022	0.333801	0.268676	0.183794	Down
Glyma.09G252800	CYP97	0.616774	0.422815	0.425403	0.321639	Down
Glyma.09G048800	CYP81	0.730688	0.280393	0.385742	0.679381	Down
Glyma.07G162900	CYP74	0.9773	1.09617	0.421309	0.261104	Down
Glyma.02G287300	CYP718	0.792995	0.267041	0.60452	0.482459	Down
Glyma.19G258700	CYP78	0.609077	0.0844557	0.546253	0.124559	Down
Glyma.07G010700	CYP90	1.35644	0.395291	0.450739	0.51692	Down
Glyma.19G033900	CYP85	0.552496	0.361162	0.59461	0.610135	Down
Glyma.07G083300	CYP704	0.396497	1.30182	1.0831	1.26645	Down
Glyma.05G042600	CYP71	1.32709	0.357644	1.32709	0.0738458	Down
Glyma.09G160900	CYP720	1.05733	1.71908	0.570936	0.275691	Down
Glyma.04G030100	CYP722	0.399975	1.14195	0.989858	0.253926	Down
Glyma.08G238100	CYP72	0.516581	1.36499	0.698882	0.213806	Down
Glyma.05G019200	CYP78	0.833219	0.558754	0.569476	0.0898992	Down
Glyma.16G021200	CYP78	1.21282	0.824685	0.723054	0.450025	Down
Glyma.11G175900	CYP86	0.198249	0.400561	0.201507	4.34213	Down
Glyma.09G029400	CYP88	0.579784	0.453466	0.684363	0.370622	Down
Glyma.14G059900	CYP90	0.72437	0.667602	0.516684	0.225324	Down
Glyma.11G067700	CYP90	1.21269	0.745726	0.525204	0.373942	Down
Glyma.11G016200	CYP97	0.597135	0.579125	0.47342	0.286486	Down
Glyma.07G083000	CYP76	0.447851	0.59119	0.882098	1.23729	Down
Glyma.08G350800	CYP93	0.58674	1.21154	0.739993	0.239051	Down
Glyma.06G238500	CYP72	0.520097	1.51447	1.10082	0.47863	Down
Glyma.03G115300	CYP51	1.19374	0.666503	0.6988	0.291247	Down
Glyma.07G110900	CYP51	1.278	0.692208	0.74409	0.35372	Down
Glyma.13G277100	CYP72	0.422681	1.10343	1.34972	1.44738	Down
Glyma.09G186200	CYP736	1.89339	3.06047	3.54335	8.02678	Up
Glyma.13G181900	CYP71	1.63771	4.28862	2.12458	0.876517	Up
Glyma.16G195600	CYP71	4.04758	128.764	336.936	266.903	Up
Glyma.11G062600	CYP71	23.6577	224.448	693.922	439.658	Up
Glyma.07G267100	CYP71	3.29093	0.801123	1.41055	1.36467	Up
Glyma.11G062500	CYP71	117.958	1049.47	3350.05	3091.18	Up
Glyma.17G249400	CYP721	1.77008	2.36045	1.00753	3.10152	Up
Glyma.17G118100	CYP734	1.77598	1.10572	1.04951	0.581535	Up
Glyma.20G114200	CYP73	67.4045	63.9229	85.0527	70.5596	Up
Glyma.17G015400	CYP77	4.01855	0.974339	0.871381	2.20739	Up
Glyma.05G147100	CYP78	1.69927	1.71669	3.8862	5.24305	Up
Glyma.06G035300	CYP82	5.14977	2.8067	2.15219	3.39108	Up
Glyma.11G060100	CYP82	11.8949	7.00983	3.0226	2.06768	Up
Glyma.13G068800	CYP82	1.67272	7.135	10.2852	9.97225	Up
Glyma.13G285300	CYP82	25.0374	92.4572	149.41	147.251	Up
Glyma.08G140600	CYP736	14.8687	205.288	468.503	408.884	Up
Glyma.07G220500	CYP89	2.24843	1.92953	1.42529	1.41207	Up
Glyma.02G256800	CYP90	1.81416	1.15256	0.950504	0.604699	Up
Glyma.18G028300	CYP90	3.25694	1.35905	1.36737	1.25538	Up
Glyma.01G175500	CYP90	1.74409	1.8507	0.99478	0.53655	Up
Glyma.08G193900	CYP90	1.73807	0.919097	0.883317	0.892219	Up
Glyma.19G090800	CYP94	8.49021	5.18118	2.45313	3.59597	Up
Glyma.16G057100	CYP94	4.65884	1.8526	0.957157	1.65414	Up
Glyma.03G193500	CYP94	4.87002	2.00281	1.44559	0.674244	Up
Glyma.11G185700	CYP94	29.5982	7.77406	3.27007	7.0011	Up
Glyma.12G087200	CYP94	155.417	21.8728	11.1889	21.7651	Up
Glyma.13G152202	CYP94	2.05329	2.36045	0.719667	0.221537	Up
Glyma.19G003600	CYP96	4.30571	13.6441	5.06915	19.9014	Up
Glyma.16G008600	CYP92	3.18231	1.83935	1.89817	5.99262	Up
Glyma.09G048900	CYP81	3.02329	20.5788	102.643	46.9881	Up
Glyma.03G143700	CYP93	13.3049	33.8014	68.216	58.4977	Up
Glyma.03G142100	CYP93	19.3764	22.3289	7.32861	6.42458	Up
Glyma.07G202300	CYP93	2.18861	3.08946	3.2159	2.53133	Up
Glyma.13G173401	CYP93	4.94344	6.11354	9.94174	10.068	Up
Glyma.13G173500	CYP93	4.55954	7.51342	12.1621	12.1192	Up
Glyma.01G169200	CYP84	2.78787	5.38255	12.5312	7.7538	Up
Glyma.13G051600	CYP79	2.48048	0.306845	1	3.22064	Up
Glyma.05G220500	CYP716	6.9387	2.86115	0.719667	0.147692	Up
Glyma.11G051800	CYP81	6.44308	248.849	445.834	516.403	Up
Glyma.01G153300	CYP707	22.2151	1.10794	0.957514	3.08686	Up
Glyma.16G109300	CYP707	3.27873	10.5533	3.72013	11.1337	Up
Glyma.15G095000	CYP710	4.35325	2.06741	2.43758	2.52028	Up
Glyma.04G035000	CYP74	1.838	29.1523	2.67776	1.27799	Up
Glyma.14G078600	CYP74	22.3416	2.77694	1.21476	1.98703	Up
Glyma.17G246500	CYP74	13.1714	4.00561	2.5442	4.775	Up
Glyma.11G122700	CYP74	3.97783	2.37448	0.832808	0.55127	Up
Glyma.03G160100	CYP94	9.41681	17.5246	23.677	97.6979	Up
Glyma.03G160200	CYP94	1.75911	6.32577	2.7246	4.70325	Up
Glyma.03G160300	CYP94	2.37377	1.01458	0.596566	0.680158	Up
Glyma.19G162100	CYP94	7.53345	6.60926	27.2034	61.7203	Up
Glyma.06G052700	CYP711	0.726912	4.00561	2.48525	0.827072	Up
Glyma.17G227500	CYP711	1.1363	1.70971	1.99049	1.1347	Up
Glyma.09G186300	CYP736	0.506396	1.70892	2.256	1.84293	Up
Glyma.09G186400	CYP736	1.96392	3.15827	4.41765	4.8511	Up
Glyma.01G179600	CYP71	0.991243	38.0533	126.949	145.772	Up
Glyma.10G115500	CYP71	1.32166	2.67041	6.0452	0.344614	Up
Glyma.14G015100	CYP71	22.2144	13.0182	46.3466	59.9628	Up
Glyma.10G114600	CYP71	14.2956	14.2956	41.8127	78.5719	Up
Glyma.05G021900	CYP75	3.96497	17.0239	26.1959	13.4399	Up
Glyma.05G022100	CYP75	0.59899	9.74931	19.1783	11.4534	Up
Glyma.06G202300	CYP75	0.258411	5.05337	9.94348	10.6074	Up
Glyma.01G135200	CYP82	1.65207	69.987	780.727	592.046	Up
Glyma.16G089700	CYP82	0.762495	2.85015	1.86006	2.62436	Up
Glyma.01G181800	CYP82	1.0551	1.04067	2.48356	4.21645	Up
Glyma.19G014600	CYP82	1.20151	3.15594	6.28945	4.292	Up
Glyma.17G255900	CYP83	1.16617	2.23843	3.31894	7.23688	Up
Glyma.13G265300	CYP76	0.524981	2.45895	4.17185	1.49329	Up
Glyma.09G048700	CYP81	0.495622	0.500702	14.1055	286.374	Up
Glyma.09G049200	CYP81	0.330414	20.0281	284.057	134.606	Up
Glyma.09G049300	CYP81	0.849637	14.5919	185.674	82.1165	Up
Glyma.15G156100	CYP81	6.04034	110.822	2272.32	2061.82	Up
Glyma.19G146800	CYP93	0.330414	8.34503	352.637	55.8274	Up
Glyma.02G236500	CYP73	1.33456	3.23114	3.15362	2.02597	Up
Glyma.14G205200	CYP73	0.892379	2.70984	2.36413	1.74681	Up
Glyma.03G226800	CYP72	27.3175	3.00421	12.0904	21.7107	Up
Glyma.13G217400	CYP710	1.37018	2.67508	1.84362	3.11598	Up
Glyma.10G200800	CYP76	0.180226	1.7297	3.29738	11.7482	Up
Glyma.13G120500	CYP94	0.792995	1.60225	4.03014	2.68799	Up
Glyma.04G110400	CYP71	0.330414	4.33942	1.00753	5.6235	Up
Glyma.20G018800	CYP89	0.513978	2.25007	1.06973	0.880679	Up
Glyma.11G228900	CYP90	1.10138	3.22675	1.23143	2.18255	Up
Glyma.03G122000	CYP98	1.41086	2.16502	1.67124	1.13432	Up
Glyma.16G131200	CYP84	0.914994	2.31093	1.50073	0.744654	Up
Glyma.13G371400	CYP701	0.792995	0.848462	0.937922	0.522559	Up
Glyma.20G159700	CYP715	4.95622	2.00281	1.00753	29.9814	Up
Glyma.05G010200	CYP734	0.69387	1.3352	1.67922	1.82645	Up
Glyma.15G203500	CYP82	23.8144	23.8144	3.0226	308.085	Up
Glyma.11G168428	CYP83	0.792995	1.3352	1.54489	3.0326	Up
Glyma.19G126000	CYP98	1.28353	1.77905	1.24004	0.632423	Up
Glyma.03G021200	CYP76	0.723765	1.62529	1.5033	1.42768	Up
Glyma.07G039800	CYP92	0.592381	0.804643	1.25546	1.79381	Up
Glyma.05G233200	CYP736	0.916634	1.43212	1.23504	1.44515	Up
Glyma.07G089800	CYP736	0.749477	0.781583	1.52359	17.0962	Up
Glyma.11G074100	CYP84	0.779815	0.79613	0.817749	0.609995	Up
Glyma.13G262000	CYP72	0.749196	1.51375	1.74561	2.40428	Up
Glyma.08G125100	CYP716	0.603366	0.522472	1.05134	3.19142	Up
Glyma.01G061100	CYP78	2.03205	1.21837	0.75565	0.25846	Up or Down regulation
Glyma.20G147900	CYP76	3.69496	0.215356	0.144449	3.85374	Up or Down regulation
Glyma.10G115300	CYP71	1.17147	1.0014	2.88521	0.281957	Up or Down regulation
Glyma.04G035500	CYP82	0.440553	1.11267	2.12702	1.49333	Up or Down regulation
Glyma.11G100100	CYP86	0.247811	0.250351	15.3649	8.52918	Up or Down regulation
Glyma.08G243600	CYP716	0.937246	2.31843	1.00361	0.293659	Up or Down regulation
Glyma.14G192500	CYP86	0.660829	1.0014	0.335845	7.23688	Up or Down regulation

## Sheet: PRJNA478334
PRJNA478334		Fold Change in Different Cultivars (Infected over mock)
Gene Id	GmP450 Family	12011	12013	12016	12019	12028	12029	12030	12038	12042	12049	12051	12053	12054	12056	12057	12061	12063	12065	12068	12069	12071	12073	12074	12075	12076	12082	12090	12091	12092	12099	12100	12101	12104	12108	12109	12122	12124	12132	12133	12137	12141	12144	12147	12150	12151	12154	12157	12158
Glyma.01G061100	CYP78	0.175077	0.14606	0.205365	1.5732	0.868071	0.576403	0.584924	1.8843	0.444901	0.770017	0.696708	0.423835	0.173485	0.234249	0.514289	0.257486	0.506731	0.500589	1.28573	1.18125	1.08149	0.745971	1.29139	0.344941	0.210348	0.186927	0.113359	0.212306	1.11158	0.793948	5.78027	0.892227	2.02856	0.704594	1.39183	1.355	0.53288	0.233011	0.197741	0.155742	0.225349	0.631681	0.707338	0.896653	1.15716	0.603026	0.293256	0.899389
Glyma.02G290000	CYP728	0.365795	0.260087	0.528685	1.19053	1.22319	0.595616	0.895665	0.870178	0.566237	0.92041	0.62337	0.779309	0.296381	6.86162	0.359774	0.421217	0.536539	1.05387	0.818602	0.926831	1.80249	0.717997	1.15495	0.526489	0.316372	0.302214	0.606212	0.260264	0.384188	1.36105	2.19089	0.854098	0.662387	0.451551	0.268057	0.545357	0.284022	0.447098	0.354127	0.360263	1.93596	0.419066	0.754494	0.825329	0.495927	0.964842	0.266667	0.530515
Glyma.03G029900	CYP83	0.5249	0.0352809	0.0500986	0.590391	0.790042	0.562526	2.3452	1.06268	0.284052	0.512389	0.552721	1.56656	11.4825	0.123157	0.0417907	0.0320096	0.807603	0.221829	0.433794	0.160351	1.8207	1.18275	0.29378	0.424313	5.05932	0.0224638	0.0266932	0.031339	0.288954	0.754251	21.0342	0.599502	0.283355	0.176532	2.77619	0.34433	0.0470998	0.18962	1.15575	1.7622	0.293851	0.598544	0.708393	1.18925	0.888976	0.851658	0.335969	0.729731
Glyma.03G030800	CYP83	1.10941	0.6611	0.855167	1.70076	2.24685	0.446712	0.575784	0.41219	0.296601	1.73254	0.526401	0.935536	0.569295	2.75669	2.32779	0.553584	0.337821	0.295084	1.57427	0.894884	0.901245	0.205142	0.418829	0.0877481	0.909766	1.09989	1	2.21018	0.128063	4.42921	0.193494	0.396545	2.14569	0.953274	1.46213	0.79706	1	1.26559	0.859221	0.728422	0.614589	0.330418	0.514428	0.29345	0.297556	0.13916	0.909093	0.2532
Glyma.03G031000	CYP83	1.24101	0.423029	0.214712	1.95845	0.604803	0.395659	0.684266	0.665463	0.393847	0.583405	0.589932	2.60713	0.0686033	122.64	0.0784326	0.0515487	0.635103	0.414523	0.713376	0.691978	0.81112	0.675335	0.577954	0.370068	1.91957	0.056331	0.0974091	0.165779	0.357118	0.524305	17.8325	0.494834	0.551156	0.642424	0.917036	0.547598	0.0541786	0.0440935	0.0509317	0.328374	0.433032	0.502484	0.803487	0.580187	0.623556	0.740952	0.333953	0.489521
Glyma.05G021800	CYP75	0.628289	0.203495	1.04755	0.392483	6.0765	0.382896	0.393699	0.360666	0.26694	0.477332	0.302401	0.497664	0.600809	0.262644	0.798409	6.73611	1.14015	0.335323	0.561581	0.557585	1.16632	0.506822	0.260605	0.335038	0.638266	1.07787	0.630612	0.541479	0.338655	0.903458	4.0618	0.732084	0.370937	0.522031	1.1221	0.475439	0.689393	0.377467	0.210503	0.220449	0.306349	0.324655	0.485309	0.550219	0.347149	0.3822	0.492425	0.709954
Glyma.05G042600	CYP71	0.496021	0.738949	1.59312	0.42519	0.325527	0.255264	0.767713	0.549586	0.563044	0.216567	0.1974	0.287114	0.727238	1	0.8673	0.990035	0.506731	0.245903	0.879824	0.490675	1.12656	0.164114	0.244317	0.394867	1.14401	0.81961	1.64406	0.82348	0.833972	0.113421	0.692438	0.132182	0.206076	0.520688	0.657958	0.0885622	0.490174	0.808359	1.2005	0.5428	0.553131	0.429543	1.36128	0.422115	0.371945	0.603026	0.16529	0.1688
Glyma.05G147100	CYP78	0.256937	0.267941	1.03979	1.46884	0.719259	3.03764	2.37293	3.17975	0.566237	0.775083	1.02648	0.530057	0.3461	0.670364	0.566066	0.244762	2.89561	0.819677	1.06927	0.892136	1.96635	0.63822	1.62878	0.432473	0.368725	0.232582	0.130858	0.268733	0.776914	1.38941	3.97846	0.495682	0.816061	1.07243	2.26173	1.32843	0.418949	0.219832	0.180123	0.204388	0.790186	1.21897	0.734897	0.690471	1.26138	1.97354	1.02273	1.03552
Glyma.06G176100	CYP71	0.37509	0.511509	0.256001	0.70865	0.752328	0.71474	0.667576	0.494628	0.635573	0.677949	0.740252	0.646006	0.261769	0.792225	0.222989	0.636363	0.572827	6.12867	0.695977	0.357784	0.626953	1.96936	0.404387	0.386092	0.588266	0.486294	0.528373	0.577425	0.853751	1.1413	1.61591	1.11033	1.41829	0.659959	0.672107	0.557942	0.533192	0.404123	0.385821	0.448578	0.50461	0.733366	0.467662	1.46725	0.861347	0.603026	0.378789	0.392785
Glyma.07G052300	CYP78	1.14234	0.0662027	0.0807892	1.07832	1.43774	0.770193	0.905901	1.00757	0.457986	0.541418	0.622571	0.530057	0.0894264	0.0349437	0.0971271	0.110872	0.438254	0.373299	0.482544	0.590627	1.32612	1.13317	0.594025	0.399023	4.4154	0.0746736	0.074894	0.273428	0.320157	0.534388	9.66117	0.709608	0.846704	0.538807	2.27294	0.755109	0.115015	0.0889382	0.0877985	0.328374	0.245836	0.392192	0.643035	0.683605	0.474551	0.245518	0.411665	1.01129
Glyma.07G083000	CYP76	0.741168	8.25694	0.0250692	0.860814	0.676866	0.474791	0.643084	0.82438	0.489891	0.658273	0.571077	0.653736	7.00057	0.149135	0.0309009	1.7263	1.30661	0.588555	0.948061	0.594351	1.0068	0.607313	0.819793	0.817358	0.875533	0.0317353	0.0267948	0.0835476	0.546315	0.947166	0.503303	0.77075	0.605986	0.65615	0.777381	0.560003	2.48666	0.0142103	1.52427	0.819621	0.643357	0.972713	0.607443	0.919825	0.89694	0.745085	0.756776	0.591046
Glyma.07G162900	CYP74	0.873945	0.050724	0.0145025	0.803958	0.678674	0.615232	0.573385	0.522217	0.539965	0.664811	0.533374	1.68657	0.010882	0.0592979	0.0550235	0.0478752	0.495267	0.628823	0.802675	0.730029	0.784537	0.603763	0.885741	0.678481	1.14952	0.0403503	8.36388	0.121349	0.532571	1.01825	20.0519	0.474247	1.43269	0.684402	0.987947	0.706866	2.18757	0.0410443	0.931142	0.0406236	0.548688	0.859812	0.714078	0.914767	0.590875	0.601594	0.805257	0.722782
Glyma.07G220500	CYP89	0.159672	0.219093	0.113125	0.602353	0.682056	1.72303	1.53543	0.749436	1.06776	1.26003	1.128	0.631651	0.2276	0.413288	0.232658	0.362158	1.88215	0.700824	0.809531	0.817792	1.0139	0.58612	0.81439	0.631786	0.216626	0.197878	0.305326	0.331354	0.790975	0.952738	4.30211	0.845964	0.788241	0.838881	0.794087	1.07296	0.216961	0.175145	0.203394	0.126821	0.776324	1.58253	0.795025	0.641922	0.803402	0.741425	0.737815	0.675201
Glyma.08G104100	CYP78	0.0792931	0.144706	0.24313	1.00859	0.930076	0.655178	1.41421	0.989255	0.773741	0.346507	1.3818	0.516805	0.205074	0.2586	0.262039	0.130512	0.506731	0.279821	0.565481	0.408896	1.08771	0.886214	0.977268	0.291449	1.42274	0.12699	0.130716	0.150788	0.784384	1.49968	7.39118	0.528727	1.20555	0.664403	2.61965	0.230262	0.181008	0.0876727	0.138175	0.111816	0.667269	0.843745	0.868812	0.978167	1.48778	0.856932	0.507782	0.561927
Glyma.08G238100	CYP72	1.52637	0.0136421	0.0255136	0.783431	0.66372	0.501834	0.494314	0.514413	0.541274	1.2525	0.629134	0.594094	0.0351718	0.533681	0.00836141	0.620752	0.449211	0.889902	0.906449	1.38123	0.605626	0.670792	1.13016	1.20293	2.04417	0.874331	0.0156267	0.120538	0.541177	0.518105	128.175	0.594466	0.877007	0.760857	1.05974	0.899806	0.967453	0.00956559	0.774363	1.24506	0.9353	0.622501	1.03969	0.671111	0.412039	0.619476	1.12921	0.939507
Glyma.08G243600	CYP716	0.0936417	0.114058	0.0828501	0.503728	0.477108	0.446712	0.383856	0.699474	0.551426	1.3079	0.655977	0.464642	0.0698073	0.0552084	0.0779515	0.0161126	0.427447	1.06001	1.07441	1.02981	0.472339	0.563826	1.11334	0.674863	0.112614	0.224902	0.152746	0.0920163	0.607265	0.762505	0.221693	0.549063	0.938791	0.837959	0.326015	0.783664	0.113447	0.115529	1.13985	0.0782844	0.755945	0.627934	0.836546	0.433796	0.440383	0.520337	0.409501	0.509574
Glyma.08G350800	CYP93	1.81591	0.64174	1.57444	0.646368	0.62338	0.509356	0.40764	0.473781	0.568849	1.19592	0.543642	1.18873	1.94327	0.0166775	0.300795	0.14174	0.42662	0.953446	0.877896	1.13199	0.569638	0.674318	1.18221	0.936337	1.75097	0.0474328	1.34989	1.08545	0.511585	0.607207	0.940698	0.622166	1.23568	0.655874	0.453076	0.899691	1.63962	0.0574245	0.617077	0.995263	0.650044	0.836806	1.09556	0.673771	0.592412	0.61303	1.19089	0.898928
Glyma.09G186400	CYP736	0.340807	0.338479	0.938229	1.21483	0.909408	1.03087	0.901228	1.17769	1.06776	0.673765	0.614135	0.287114	0.538109	0.705703	0.510777	0.400138	1.3175	0.685016	1.20636	0.817792	0.996112	0.426696	0.884194	0.342218	0.786029	0.39751	0.847202	0.48497	1.25501	1.01048	0.0868797	0.616848	0.547975	0.672899	0.923449	0.7246	0.255496	0.311029	0.471338	0.305139	1.0009	0.805393	0.968335	0.607861	0.429168	0.58795	0.787881	0.510621
Glyma.09G279100	CYP71	3.2514	0.183512	0.22351	0.417168	0.815461	0.612634	0.361922	0.556456	0.530095	0.891019	0.666227	0.555087	0.0918862	0.634038	0.157468	0.154332	0.861443	0.713119	0.678578	0.568899	0.726003	0.769283	1.24686	0.382901	0.130779	0.133145	0.158576	0.0924256	0.258296	0.766571	7.57152	0.666196	0.819512	0.544728	0.510743	0.550696	0.16316	0.232869	10.8724	8.19621	0.650742	0.58889	0.669953	0.978167	0.9092	0.548821	0.346321	0.618934
Glyma.10G114600	CYP71	0.409552	0.169363	0.222874	1.37762	0.82722	0.847213	0.767713	0.703739	0.510327	0.775083	0.759233	0.619562	0.0976723	0.266841	0.364001	0.400933	0.687707	0.82283	2.65399	1.30847	1.38405	1.1488	1.32908	0.603536	4.62391	0.280285	0.291924	0.155172	0.57895	1.24763	0.173759	1.03823	0.28255	0.879945	1.03209	0.589131	0.377159	0.106192	0.0901183	2.36429	0.518248	2.83379	1.11642	0.525996	1.37207	1.10384	0.635868	0.994716
Glyma.10G200800	CYP76	2.2069	0.708128	0.850572	0.85038	1.59146	0.0992694	0.236219	1.41322	0.108512	0.48126	0.273324	0.574228	0.301992	0.913957	0.926111	0.734145	0.633414	0.216973	0.431822	1.36299	0.581448	1.45177	0.462916	0.200567	0.603252	0.312567	0.626979	0.517247	0.128063	0.360886	0.19454	0.25045	1.15918	0.659959	0.373309	0.265687	0.266553	0.629397	8.54603	0.457584	0.368754	0.460225	0.685904	0.733625	0.446335	0.195576	0.11655	0.181152
Glyma.11G060100	CYP82	1	5.19427	4.79933	1	1	5.01898	1	0.17501	5.08858	0.866269	1	0.109369	1	1	0.870926	4.97087	1	1	5.30101	4.01778	2.40405	1	0.325756	5.34073	1	2.46911	2.4764	1	5.02475	1	1	0.17184	4.81677	1	1	4.92111	5.41446	1	4.82208	1	1	2.31894	0.188163	1	2.47214	0.904539	1	0.191296
Glyma.11G100100	CYP86	0.109326	0.147969	0.27938	0.688403	1.24646	0.794155	0.725062	0.360666	0.622861	0.47026	0.379009	0.376218	0.273772	1.38092	0.291517	0.0842014	0.844552	0.368855	0.60318	0.681493	0.573519	0.38615	0.81439	3.58792	0.351566	0.367317	0.552601	0.415183	0.606415	0.793948	2.3176	0.69792	0.463671	0.787487	0.636733	0.242583	0.329515	0.176925	0.269008	0.285568	0.645319	0.79915	0.257214	0.237349	0.54813	0.58795	0.784316	0.965538
Glyma.11G175900	CYP86	1.94866	0.115586	0.247577	0.66436	0.886156	0.446712	0.527802	0.664822	0.205339	0.488664	0.65026	0.485885	0.165757	0.351155	0.14826	0.235058	0.900856	0.30265	0.220079	0.619539	0.816753	0.26855	0.228029	0.712308	0.18625	0.243666	0.330639	0.234616	0.271648	0.700543	0.0719005	0.566493	0.401848	0.551896	0.719641	0.101752	0.198219	0.121672	0.273626	0.198833	0.335231	0.745126	0.200055	0.396554	0.595113	0.326639	0.312806	0.438412
Glyma.14G192500	CYP86	1.89406	0.111831	0.175344	0.669448	1.40687	0.382896	0.69574	0.686983	0.32884	0.44807	0.610147	0.534626	0.256804	5.71801	0.175007	0.110985	0.373381	6.48131	0.387759	1.1378	0.647047	0.117224	0.535921	0.44549	0.167886	0.160914	0.229669	0.230075	0.428732	0.256866	4.57545	0.450133	0.394121	0.283003	0.685372	0.164473	4.82261	0.12926	5.32835	0.128576	0.361228	0.655618	0.404193	0.222708	0.442314	0.232852	0.170123	0.641441
Glyma.15G243300	CYP72	1.35958	0.125228	0.147339	0.503105	0.485931	0.446712	0.582893	0.497893	0.574872	0.898958	0.609899	0.370226	0.116653	0.269464	0.126698	0.167024	0.291544	0.972176	0.90477	0.700079	0.527872	0.576144	1.22973	0.479018	0.146335	0.128492	0.251606	0.170744	0.296873	0.348856	6.22127	0.718379	0.577157	0.712728	0.346625	0.644681	0.19095	0.17961	0.183724	0.228434	0.47938	0.316876	0.723255	0.562684	0.466968	0.686449	0.523417	0.723513
Glyma.16G090000	CYP82	0.454987	0.896226	0.372637	0.517623	1.12849	0.41235	0.629918	0.82438	0.752909	0.693015	0.526401	0.70934	27.6679	1.60163	0.405731	0.551366	1.21616	0.442626	1.0053	0.499762	1.35187	0.761956	0.542926	0.625205	0.365934	0.383421	0.452415	0.453214	0.824724	0.595461	2.10924	0.740218	0.564469	0.785049	0.750303	0.277238	0.467109	0.464404	0.499205	0.476113	0.347062	0.576216	1.08938	0.67249	0.606133	0.58529	0.385676	0.928401
Glyma.17G080500	CYP78	0.0475968	0.389664	0.0672104	0.457897	0.517149	0.5498	0.730263	0.419967	0.505569	0.622631	1.0933	3.84733	0.0593161	0.0433314	0.124835	0.0672923	0.345009	0.488343	0.648703	1.02224	0.852964	1.00478	1.05545	0.239313	0.0638014	0.0955004	0.0410495	33.5861	0.634067	0.444611	8.91403	0.637921	1.02327	0.83158	4.98236	1.0751	0.0687162	0.124737	0.145062	0.137398	0.279744	0.320555	0.847293	0.759826	0.553961	0.400582	0.324676	0.52551
Glyma.17G125400	CYP71	0.237484	0.325047	0.436847	0.106298	0.289357	0.893424	1.0556	0.641184	0.111225	0.371258	0.282001	0.191409	0.853056	1.54903	0.523208	0.382852	0.608078	0.564131	0.339289	0.363463	0.60083	0.615426	0.266528	0.21937	0.920182	0.549376	0.330599	0.496773	0.0717151	0.926273	1.20522	0.793091	0.285336	0.146658	0.580551	0.14492	0.246419	0.189642	0.438918	0.213554	0.510582	0.31818	0.791428	0.570598	0.350066	0.565337	0.151516	0.238732
Glyma.18G080200	CYP71	1.6515	0.124411	0.0885695	0.438477	0.538525	0.446712	0.40698	0.483636	0.374653	0.745954	0.564001	1.03833	0.0632381	0.248801	0.0600261	0.133235	0.427907	0.712703	0.664441	0.604455	0.543216	0.689627	1.17634	0.484924	2.10178	0.0817513	0.135988	0.0786668	0.454715	0.88417	9.80066	0.511995	0.7329	0.370718	0.497214	0.515744	0.117216	0.474051	0.115497	9.95491	0.382757	0.452151	0.968335	0.631259	0.655799	0.775319	0.471382	0.624008
Glyma.18G239900	CYP97	1.13222	0.745713	0.311696	0.71611	0.496041	0.467984	0.472439	0.602431	0.647128	0.505323	0.315841	0.574228	0.581	34.4224	0.47513	2.61024	0.715386	0.624216	0.60318	1.63558	0.658602	0.424432	0.382409	0.432473	1.00275	0.612278	0.900658	0.588423	0.843707	0.626801	0.94798	0.481519	0.667687	0.779952	0.443305	0.306561	0.52747	0.815758	0.773724	0.955799	0.737507	0.906813	1.14317	0.573145	0.446335	0.841432	0.447959	0.618934
Glyma.19G014700	CYP82	0.124857	0.176705	0.142861	0.90584	1.02239	0.755974	0.732817	0.555194	0.694479	0.990021	0.909239	0.489157	0.158783	0.884201	0.106662	0.182114	0.619338	1.4164	0.570399	1.09039	0.519361	0.445961	1.07836	0.614237	0.154485	0.207523	0.214442	0.202545	0.721524	0.962362	6.27391	0.52344	0.782445	1.40919	0.347436	0.98304	0.188688	0.176494	0.172246	0.851997	0.529081	0.633301	1.10414	0.875617	1.10457	0.626219	0.494174	0.564322
Glyma.19G258700	CYP78	0.278001	0.118936	0.214291	1.12096	1.48083	0.423201	0.732817	0.638229	0.168341	0.742516	0.464472	0.680566	0.240263	0.212548	0.212111	0.277439	0.693422	0.516397	0.361908	0.759378	1.51573	0.765864	1.75908	0.197433	0.190861	0.142253	0.119537	0.126591	0.298813	0.396974	4.82608	0.543834	1.23646	0.525944	0.622392	0.647611	0.439558	0.153764	0.269134	0.876149	0.518987	0.302883	0.419164	0.5869	0.518469	0.389295	0.421608	0.742721
Glyma.20G007100	CYP71	0.168915	0.150371	0.13563	0.395867	0.727303	0.376179	0.732817	0.730165	0.444901	0.654121	0.713189	0.406161	0.118971	0.524654	0.238552	0.0725068	0.411719	0.465922	0.613951	0.594758	1.14158	0.629102	1.09003	0.815208	0.198332	0.117226	0.195954	0.122687	0.298813	0.691503	6.10006	0.406217	0.542835	0.635516	0.48202	0.893673	0.126011	0.15328	0.163527	0.138634	0.409726	0.349004	0.66573	0.582585	0.605493	0.57431	0.491402	0.610092
Glyma.01G135200	CYP82	5.15403	0.709388	62.851	8.4859	12.804	6.3801	15.9458	5.97675	12.109	12.8921	21.726	7.38209	0.166857	64.4784	0.132227	4.83922	5.83843	3.30318	6.4312	11.153	6.16826	8.69802	4.75026	5.88748	5.7559	0.324124	0.045933	10.7085	23.3634	4.63252	64.5539	8.10022	4.15927	5.37056	3.20424	7.14974	0.102117	0.958082	2.5137	7.08402	6.94732	25.5885	11.2831	5.30132	4.73741	11.8642	9.1901	11.3593
Glyma.01G153300	CYP707	0.0197322	0.115522	0.00857512	0.698357	0.493765	0.46177	1.51886	0.470202	1.21667	0.866269	0.604387	0.781217	0.0345221	0.0852713	0.0690042	0.0375092	0.361951	0.269987	0.506671	0.148689	0.512472	0.771334	0.19778	0.575847	0.035412	0.0492925	0.0154646	1.60581	1.01868	0.32692	7.47924	0.945608	0.26691	0.592096	1.02097	0.468114	0.107248	0.0654841	3.0242	0.328374	0.443269	0.592201	0.323054	0.741868	2.39884	0.62589	0.810706	1.12836
Glyma.01G179400	CYP71	0.299828	0.483215	0.982243	2.55114	0.795732	1.90597	4.41435	2.54808	3.94055	1.73254	1.41297	1.29957	0.653891	3.16632	0.445615	0.635845	2.92778	1.35247	2.58506	0.98135	1.80249	1.74371	1.67532	1.05298	28.0804	1.68445	2.53413	0.725316	2.33074	2.38184	3.0323	1.90342	1.39101	2.04273	3.50911	2.05557	0.554069	0.363415	0.411208	0.836665	2.45836	4.65338	3.94395	1.66288	1.77389	4.91035	5.22729	1.0972
Glyma.01G179700	CYP71	1	1	1	4.90419	0.388894	0.201119	0.70586	0.395459	0.59269	0.866269	0.419812	1.72268	1	1	1	1	0.252906	0.151663	2.34595	1	0.211777	0.820568	0.223489	0.111378	1	1	1	4.39144	2.2411	4.40023	0.584305	0.582447	0.217517	1	0.283688	0.182994	4.79231	5.02926	1	1	0.628954	0.261599	0.637773	1.10044	0.495927	1.80908	4.61544	1
Glyma.02G057500	CYP90	13.0206	13.5782	1	1	0.0658377	1	1	0.133898	0.0668927	1	1	1	1	1	1	1	0.171262	0.205405	0.195877	1	1	1.64114	6.45735	1	24.0242	12.9089	1	1	0.409487	3.17579	0.131893	0.793091	1	0.476637	1.0966	0.18588	14.1538	1	1	1	1	2.14772	2.05771	0.240759	0.0575558	5.42723	0.606062	0.0731792
Glyma.03G142000	CYP93	4.53718	1	1	1.70076	1	0.19542	1	0.384253	4.63523	0.208357	0.203958	1.08059	1	1	1	1	4.12414	1	1	1	0.411553	1	0.434312	0.108222	1	4.49826	1	4.5195	4.57708	0.793948	0.189249	1	0.211354	4.28653	1	2.24134	1	1	1	1	1	0.254187	1	1	0.16517	1	1	1
Glyma.03G142100	CYP93	0.0690053	0.119934	0.0400166	2.08282	1.53885	3.1098	2.51864	1.88016	2.48317	2.11959	3.55321	1.29664	0.0639349	0.232193	18.2757	0.050197	1.74541	1.2531	2.26193	1.61818	2.04282	1.93289	1.5937	1.63964	5.86881	0.0717236	18.8371	0.554052	4.41816	1.03558	24.6953	2.18636	1.28329	1.82599	1.18095	2.18854	0.0886494	0.0631702	1.41037	0.0640219	1.36045	2.75298	1.83459	1.57841	3.59313	2.51824	1.86481	2.40942
Glyma.03G160100	CYP94	1	1	1.35468	2.55114	1	0.630646	1	0.206673	0.206499	0.896527	1	0.38747	4.32877	1	1	1	0.528689	1	4.48887	0.480738	0.664069	0.971584	1	0.116415	1	1	1	1	0.632047	1	0.407156	0.608792	0.227356	0.953274	1	0.191271	1	1	1	1	0.821753	0.820296	0.222207	0.371613	1	0.404047	1.81819	0.225906
Glyma.05G010200	CYP734	1	6.98696	3.22786	0.912772	3.90632	8.93424	2.30314	0.650531	6.22861	0.705485	0.138118	1.72268	1	1	3.51452	6.68646	0.665648	3.68855	2.71431	0.605275	3.60498	2.05142	0.588224	1.22847	4.12073	1	1	6.67391	0.896439	0.661624	0.384473	2.37927	4.17304	0.602396	0.548298	0.602052	7.28314	3.82162	1.08105	1	0.827705	1.53408	0.419655	1.46725	1.23982	3.61816	0.606062	0.426641
Glyma.05G042800	CYP71	2.55528	10.6588	3.2828	4.2519	1.44678	4.46712	0.767713	0.511714	1.483	6.93015	0.789602	1.53127	1	1	5.36152	10.2004	1.18237	4.42626	3.61908	3.27117	0.300415	2.87199	0.674775	1.05298	9.42947	1	3.38778	3.39376	0.298813	4.36672	0.420042	1.98273	1.54557	0.953274	0.731064	1.59412	3.70356	11.66	9.89509	2.51663	2.58128	0.715905	0.342952	1.28384	1.85973	0.603026	1.81819	1.1605
Glyma.07G118200	CYP714	1	1	1	1	1	1	1	1	1	1	0.0716424	1	1	1	1	1	1	1	1	10.4191	1	12.9322	1	6.92494	1	12.8061	1	12.8665	1	0.0615831	1	1	1	1	1	0.0624572	1	1	1	1	1	1	1	0.0606728	12.8218	27.4235	0.0448176	1
Glyma.09G048900	CYP81	2.10256	0.0823396	0.0570555	5.61858	4.4532	3.7378	5.27802	3.99418	6.06238	5.14725	9.03656	3.37047	0.0285986	17.4399	1.7768	7.87497	5.37915	1.69142	5.19405	4.65512	2.40108	2.96048	2.46814	2.69391	8.5885	1.15597	0.124687	0.118949	5.97879	1.74912	0.864304	3.86754	2.81839	3.18128	1.08698	3.12764	9.22586	0.0185636	6.96892	2.17406	2.57363	4.7727	3.39304	2.01811	4.12092	3.23413	1.97403	3.36752
Glyma.09G049200	CYP81	1.46671	0.01846	0.906211	2.57918	2.64942	2.58771	4.37262	2.31164	2.3217	2.34629	4.43521	2.87704	4.74116	8.58973	0.0302434	1.3944	2.02205	1.37023	2.12733	2.61803	1.63647	1.71609	1.95454	1.19646	1.66603	3.45984	0.0218182	1.28626	3.92505	1.38898	1.35712	2.37465	1.69514	2.0027	1.95194	1.93464	0.813007	0.360467	0.75503	0.750569	1.66122	3.50885	2.24341	1.44592	1.79591	2.30419	2.93684	2.32999
Glyma.09G049300	CYP81	2.8273	0.313405	0.184275	7.17932	5.5529	4.65163	6.76983	4.88566	9.42709	19.7667	6.80733	4.79587	26.125	0.217808	0.103377	0.149963	4.06003	4.28255	4.28001	4.18437	4.37104	3.29937	10.5056	10.6561	0.0853099	3.59355	0.0332467	0.0735276	29.2134	4.10985	77.9585	15.5013	2.86483	6.30784	4.35315	6.34182	1.57181	2.00775	3.17112	11.242	4.90903	6.35122	4.71327	2.66585	4.15816	10.9992	5.56413	17.9253
Glyma.10G115400	CYP71	1	0.790745	1.46124	1.68024	26.9102	0.992694	0.511808	0.478065	1.7796	1.38968	2.36881	2.03554	1.16732	1	1	1	1.77356	0.122952	2.0106	1.17558	1.12656	2.87199	0.173563	0.526489	0.932723	0.644371	1	1	1.36723	0.913041	1	0.584383	2.05628	1.27103	0.868138	2.48252	0.412133	0.324383	0.40041	0.560102	0.680776	3.97327	0.4162	0.0965297	0.743891	3.45369	0.890694	2.65258
Glyma.10G234600	CYP715	1	1	7.42477	0.19841	1	0.345192	0.100959	0.113125	0.11303	0.368044	1	0.0706955	1	1	1	1	1	1	0.220651	1	1	1	1	0.0637214	1	1	1	1	0.11532	1	1	1	1	0.130943	1	1	1	1	1	1	0.0899594	0.149666	1	1	0.194506	1	0.300505	0.123652
Glyma.11G062500	CYP71	1.52523	0.0700523	0.0397424	4.72694	3.63801	4.05703	6.29873	3.17217	5.66804	4.95586	8.08996	3.00044	3.60123	13.2976	0.123603	6.47256	3.61174	2.52997	3.71961	4.61235	2.56401	2.66685	3.23917	3.95067	5.92387	24.5971	0.0392237	8.58512	8.96439	2.74653	74.466	5.3038	2.37165	3.30348	2.13304	3.7665	2.28166	0.21985	1.81328	9.82422	3.30084	6.07467	3.68612	2.18815	3.05698	5.18234	6.08838	5.35079
Glyma.11G062600	CYP71	1.04277	6.38449	8.0414	3.56865	2.96018	3.4131	4.09934	2.78949	3.7295	3.10915	5.15603	3.17831	0.0628167	0.0104643	0.0346693	2.05396	2.23033	1.87491	2.4525	2.55394	2.13969	2.03812	2.00883	1.86054	1.38856	3.05175	0.115402	2.68438	5.01369	1.69845	2.49854	3.24029	1.58366	2.14074	2.34368	3.06126	0.767431	0.128375	1.72885	2.2079	2.35439	3.52779	2.22405	1.63182	2.30073	3.33358	3.36773	3.09539
Glyma.13G051600	CYP79	0.435643	2.7258	0.0519288	2.01965	2.64687	2.36119	4.22242	0.906817	5.49807	5.41418	0.885087	0.625239	1.07304	1	2.74222	0.435041	2.02693	1.1511	11.3096	0.340747	1.80249	0.820568	0.826919	1.97246	1.60761	5.18287	0.519816	1.30184	1.35987	0.476369	1.14976	0.163729	0.856008	0.165787	0.137074	2.98897	1.89423	0.542152	5.06097	1.28716	2.45836	7.517	0.102886	2.20088	4.46335	2.26135	13.8422	4.64201
Glyma.13G068800	CYP82	4.97605	0.892455	0.20666	3.24691	8.97007	5.5839	14.0747	10.466	10.5206	5.32136	16.5816	12.2244	0.800913	6.95484	2.93638	5.58654	16.7221	3.89932	7.71568	8.27273	4.68647	5.02047	5.02595	5.48468	14.2274	2.77492	0.0800895	14.171	5.00042	1.32325	2.30086	7.47885	6.18228	8.44329	2.82644	7.17354	212.195	0.152046	1.20429	1.10264	4.29335	11.3522	9.94561	3.51236	7.88524	10.2514	5.68183	6.31313
Glyma.13G173401	CYP93	18.5587	1	12.5472	3.36103	2.64798	3.54392	68.0986	7.66298	47.7747	3.5896	2.6151	8.79163	6.28454	5.23418	3.71593	610.797	2.13087	0.530852	32.2536	4.83241	1.24145	31.6567	0.954273	2.3342	309.287	12.5402	25.347	9.66137	5.5855	4.6049	1.08749	2.68609	1.57501	1.16326	2.27784	1.09974	26.5243	0.853292	18.0372	1	3.79428	7.48947	1.38559	0.704667	2.17854	4.2474	6.14834	5.94715
Glyma.13G173500	CYP93	1.32627	0.0739983	1.46792	4.05947	3.37474	3.90982	4.19604	3.57869	4.15133	4.17049	5.39156	2.76807	0.959518	9.63363	0.102052	4.71635	5.20895	4.04704	3.21852	3.19037	3.20697	2.82076	2.61329	2.59522	1.12501	1.20686	4.77681	1.2614	9.25003	1.99909	466.279	4.76272	1.79605	3.38869	2.07524	2.63784	4.75063	0.00435551	2.61857	2.82657	2.31122	4.96833	3.07474	1.77297	3.00855	3.19008	3.255	3.05509
Glyma.13G265300	CYP76	1.38625	5.78246	2.6714	3.06137	1.04169	1.78685	15.3543	1.31901	4.44901	3.17632	2.36881	2.29691	0.569082	1.72228	1.45432	1.84459	1.59258	0.73771	1.10583	3.27117	3.15436	1.64114	4.88634	0.676914	0.601826	1.83247	0.612627	1.38084	2.09169	2.77882	2.16795	2.37927	1.39101	1.498	2.01043	0.569328	1.20552	1.05427	0.488011	19.2646	0.938646	4.72497	1.91073	0.838429	4.71131	1.80908	1.61617	6.96301
Glyma.13G285300	CYP82	2.49284	4.00012	2.34693	3.35047	1.9285	3.88726	4.26724	2.87199	4.02045	3.81658	3.50469	2.91933	1.72232	20.9213	0.108582	1.75077	3.1	1.57433	2.72536	2.10085	1.67057	2.17384	1.76263	2.59659	2.62273	0.722996	4.86358	4.40764	5.21681	1.75482	2.25738	3.37812	1.6328	2.11516	2.08099	2.27314	3.66339	0.423996	1.26852	4.02173	3.01767	3.47352	2.22294	1.75468	2.63194	3.39953	3.68501	2.43535
Glyma.15G095000	CYP710	0.0764162	0.111232	0.0580376	1.37627	0.88654	2.41225	2.25661	1.39199	2.41794	1.41753	1.8753	1.26726	0.0921849	0.138282	0.0895219	0.0929005	1.07885	0.629512	1.23741	1.36855	2.13295	1.34131	0.934778	0.867158	0.0689539	0.0957728	0.0598934	0.0739121	2.29956	1.39735	9.72722	1.89318	1.88903	1.45063	1.12152	1.23829	0.105009	0.0858921	0.0669808	0.716452	1.01296	2.00765	1.28991	1.21572	4.97698	1.23195	1.67326	1.56362
Glyma.15G156100	CYP81	2.17661	0.140794	0.144182	8.24119	5.26268	5.01776	9.61339	5.21977	6.54553	10.6755	12.6222	5.47643	0.0856591	58.0859	0.0874732	7.73477	6.17115	3.08933	6.26467	7.74227	4.09545	5.06445	3.76079	3.51189	3.92781	0.169542	9.38181	7.43082	15.6996	2.19084	166.306	7.11393	3.03279	4.00081	4.04708	4.34101	3.95394	0.379241	4.91971	11.3163	3.81045	12.4373	6.18921	2.9345	4.82402	7.55776	9.09093	9.84106
Glyma.16G008600	CYP92	3.95313	0.0319056	0.365961	3.78926	1.05059	3.81979	3.03044	3.56781	2.71884	3.4974	2.47648	4.05488	0.0308824	3.55616	0.136677	2.20867	4.30234	1.73729	1.70983	2.55128	1.78257	2.62926	1.39858	2.28443	0.253307	0.0184679	0.0289659	3.22002	5.70461	1.57772	52.0537	2.47688	1.82692	2.55523	1.42589	2.23095	1.04529	0.213657	1.23701	1.17946	2.32948	3.32288	3.27749	1.89219	2.42354	2.39379	2.54752	2.49612
Glyma.16G076600	CYP707	1	1	6.84134	7.89838	1	0.124877	1	0.122772	1	1	0.130333	0.0767245	1	1	1	1	1	0.0941691	1	1	0.131495	1	1	1	1	1	1	7.07257	0.125154	0.793948	0.120934	0.361648	1	0.14211	0.0880724	0.79706	1	1	1	1	0.0976312	1	1	1	1	1	0.081533	0.928401
Glyma.16G182600	CYP715	8.14951	1	7.85235	0.656621	0.210379	1.08799	8.44484	0.534826	0.641251	0.696006	0.794866	2.87114	1	1	1	8.13302	1.01346	1	0.208636	5.72454	1.80249	4.92341	5.86361	1.05298	15.0367	1	4.05172	1	0.545201	0.488042	0.210727	0.630169	0.463671	1.42991	0.383664	0.197988	1	1	7.88957	8.02626	0.368754	6.44315	0.575024	0.86549	2.23167	0.209118	1.21212	0.935353
Glyma.16G195600	CYP71	1.7308	22.2866	0.0765409	3.54768	3.61392	3.15025	3.99722	3.63531	4.32498	3.19214	7.01413	3.5274	0.0440062	0.143715	0.0359858	3.22326	3.12093	2.39447	2.89755	3.65127	2.42283	2.8416	3.03019	3.06983	5.66873	8.56247	19.1437	0.0490768	5.26068	2.17975	1.76156	4.18267	2.64714	3.44039	2.57133	3.91402	2.26946	0.0233466	2.37949	4.18849	2.75388	5.85107	4.23446	2.0086	3.18456	4.94553	5.05767	3.85535
Glyma.17G015400	CYP77	0.65574	3.0772	1.13729	1.02046	1.51912	0.223356	3.37794	4.1219	0.556126	0.577512	0.394801	0.861342	3.02844	1.83307	1.54787	2.94486	1.21616	0.210774	0.723816	1.22669	1.80249	1.64114	0.781814	2.10595	1.2099	1.46276	0.978049	1.17573	1.49406	0.705732	0.436484	0.793091	1.48375	0.953274	0.639681	0.265687	3.20765	1.12208	0.952236	1.93747	0.295003	2.68464	0.440938	0.917032	1.48778	0.851331	0.909093	1.8568
Glyma.18G080400	CYP71	0.326918	0.373388	1.20749	2.39169	1.64144	2.33283	3.16681	1.26082	2.2245	1.25128	2.05297	0.927599	1.06788	0.320209	0.493023	0.50026	0.675642	1.40835	1.71906	1.27212	0.901245	0.441845	2.17171	4.55037	0.630614	0.414145	0.747661	0.534987	1.66482	0.718334	3.5401	1.15659	0.977469	0.774535	0.877277	1.5443	0.255423	0.295781	0.25101	0.822822	3.21821	1.20809	1.73619	1.25764	0.845331	0.904539	1.21212	2.1944
Glyma.18G223100	CYP76	5.17587	1	1	0.147695	1	0.856527	0.601225	0.168419	0.673108	0.182646	1	0.10525	1	1	1	1	0.861662	0.258361	0.328502	0.391755	1	0.820568	1	0.0948673	1	5.13147	1	1	3.58576	0.461059	1	0.661476	0.927342	1	1	0.155868	1	5.90453	2.50539	1	0.40179	0.445641	0.362154	2.20088	0.434367	0.32926	0.447386	0.184091
Glyma.19G003600	CYP96	1	1	4.54357	18.9918	1.45433	33.0567	9.82672	48.6384	27.5839	21.6515	5.10236	10.1447	1	1	1	1.56866	171.275	7.00824	36.1908	26.9871	13.5187	40.2079	3.76098	7.23922	8.7006	1	1	1.56571	15.2642	54.7824	4.91649	24.8502	14.8375	11.9159	12.7936	14.3471	1	1.79312	4.56511	1	10.3251	96.6472	4.80133	8.80841	7.15158	34.3725	32.7784	34.3509
Glyma.19G014600	CYP82	0.422682	0.480856	0.81454	1.48817	1.51912	1.86807	1.68897	2.94421	2.11328	5.19761	7.36962	1.64065	1.00114	3.15087	0.33258	0.562437	2.15361	1.68619	1.70901	1.9627	2.05999	2.15399	1.42831	4.9004	0.779891	0.419056	0.210147	0.631553	3.94433	1.19092	3.38575	1.90342	1.18025	2.26403	0.84737	6.11079	0.306313	0.413304	0.377724	0.555053	1.28093	2.64334	2.45343	0.448327	1.56217	1.58294	12.5069	1.50865
Glyma.19G033900	CYP85	8.33199	1	4.01409	2.97633	2.38719	1.04233	0.767713	1.03047	1.14403	1.73254	0.789602	0.957047	1.42519	1	2.18529	2.77171	0.675642	0.614758	2.71431	0.51112	1.26174	2.73523	6.35224	1.11673	3.07467	0.917835	1	2.76651	5.82685	0.907369	0.72139	1.18964	2.1638	1.14393	0.299072	3.18824	1.81143	4.75249	4.03312	8.20599	1.84377	1.28863	10.2886	4.40175	1.61176	1.15123	1.66667	1.8568
Glyma.19G146800	CYP93	0.704751	5.14453	2.37669	7.65342	15.8423	2.68027	8.06098	4.83636	14.5334	32.9182	40.2697	2.71453	1.68767	1	0.862587	0.652561	8.1077	1.76231	9.65088	4.90675	6.90954	27.8993	1.41161	6.84435	21.3411	61.3984	0.817561	0.546003	14.8809	4.33063	8.1806	19.4307	2.78203	5.3111	2.65011	5.38015	0.446884	0.803965	18.6492	2.42932	5.05719	6.66922	5.48723	6.35809	5.67217	6.10564	2.92012	24.1384
Glyma.20G018800	CYP89	0.0538534	0.0913646	0.116074	1.01631	1.30211	0.576403	1.0556	1.50662	0.660175	0.630014	1.1656	0.751965	0.119889	0.217701	0.112341	0.128238	0.399243	1.01435	1.39593	0.715568	1.35187	1.08432	0.977268	0.251799	0.106161	0.103294	0.174234	0.0893006	0.988381	0.873343	11.3599	0.881212	1.49801	0.604515	0.489552	1.01444	0.107448	0.14186	13.9597	0.158194	0.691413	0.859086	0.998595	1.0207	0.863873	1.069	0.427809	1.8568
Glyma.20G114200	CYP73	12.5393	20.5849	0.0294108	3.43273	2.84805	3.97155	2.05618	4.28474	3.6938	3.65974	2.29761	3.0147	0.0361639	0.0327139	0.0354055	0.0240329	1.86054	1.45972	2.31339	2.84075	1.3545	2.84785	1.71186	1.88384	0.127791	3.63971	0.0317677	0.979255	4.85228	1.86944	45.8693	3.93902	3.18692	2.13665	3.91932	2.8184	1.78315	52.802	0.0314092	5.76243	2.81751	2.1308	3.02721	3.14083	3.21623	2.5844	4.3424	2.98703
Glyma.20G147900	CYP76	3.72431	0.55483	1	1.48817	0.217018	2.68027	3.83856	1.23657	2.6694	5.19761	1.9878	1.33987	1.27409	0.578389	0.4884	1.23892	2.02693	2.21313	5.42862	2.45338	0.540747	4.92341	0.610792	0.527369	1	1	0.740651	3.70979	4.48219	7.93948	1.38333	0.689467	2.78203	0.635516	0.182766	0.531373	1.34948	0.849723	3.60551	1	3.68754	1.07386	1.02886	0.420858	2.23167	1.20605	4.04041	1.3926
Glyma.20G159700	CYP715	1	1	6.71746	1.70076	0.122961	2.68027	1.53543	0.500146	0.374794	0.271198	0.39821	0.156279	1	1	1	1	1.11949	7.69203	0.487769	0.436268	1	1	1	1	1	1	1	1	0.254925	0.114099	0.123164	1	0.275099	0.190655	0.0896966	0.79706	7.57844	7.95314	1	1	1	1	0.134434	1	0.32248	0.122224	0.415183	1
Glyma.11G197300	CYP79	1	1	1	5.77384	1	1.02496	1	1	0.503419	0.182135	0.356581	1	1	1	1	1	1	0.128819	1	0.19533	1	1	1	1	9.57678	1	1	1	1	1	1	1	0.184755	4.90365	4.55097	1	1.88071	5.92109	1	1	0.133555	1	1	1	0.144384	11.0196	1.44994	1
Glyma.11G197400	CYP79	1.21258	0.562003	0.778908	0.661407	0.173614	0.977468	0.438693	0.588843	1.7796	0.952896	0.338401	0.246098	2.48894	3.01303	0.363464	0.691499	2.02693	0.409839	0.90477	1.02224	1.57718	0.364697	1.62878	0.350992	2.9831	4.8087	1	1.20785	0.698994	0.396974	0.354064	3.17236	0.579589	0.38131	0.274149	0.265687	0.527245	0.503012	0.7826	2.38848	0.368754	0.268464	1.02886	1.46725	1.04145	0.180908	0.909093	0.11605
Glyma.17G227500	CYP711	4.91705	0.714158	0.412411	1.30214	1.15743	1.41897	1.39833	1.01281	1.10335	2.44594	1.34525	0.628916	0.425964	0.447809	0.342124	2.49676	0.923377	2.88377	1.27157	1.88448	0.730739	0.699003	1.13157	0.962204	8.2519	0.543163	1.04763	0.620145	1.93079	1.15784	4.20034	0.960057	0.818243	1.72323	0.472145	1.30047	0.57264	0.781239	0.73665	0.481765	1.03797	0.845003	1.09981	0.529841	0.589982	1.06049	0.830529	1.34102
[truncated: 50 more columns]

## Sheet: PRJNA324419
PRJNA324419
Gene Id	GmP450 Family	Fold Change in Williams cultivar (Induction over mock) at 24h	Up or Down regulation
Glyma.06G140000	CYP714	0.202866	Down
Glyma.05G042600	CYP71	0.120156	Down
Glyma.04G110400	CYP71	0.387925	Down
Glyma.06G176200	CYP71	0.179631	Down
Glyma.20G007000	CYP71	0.353161	Down
Glyma.15G050300	CYP71	0.40206	Down
Glyma.08G238100	CYP72	0.311533	Down
Glyma.01G061100	CYP78	0.299782	Down
Glyma.19G258700	CYP78	0.347671	Down
Glyma.03G030600	CYP83	0.214432	Down
Glyma.03G030800	CYP83	0.321388	Down
Glyma.03G030900	CYP83	0.087993	Down
Glyma.03G031000	CYP83	0.343427	Down
Glyma.18G100500	CYP83	0.217783	Down
Glyma.20G018600	CYP89	0.210603	Down
Glyma.02G256800	CYP90	0.331859	Down
Glyma.13G152202	CYP94	0.376837	Down
Glyma.19G057300	CYP96	0.351803	Down
Glyma.05G003200	CYP96	0.255331	Down
Glyma.03G021200	CYP76	0.382939	Down
Glyma.12G067000	CYP93	0.179546	Down
Glyma.08G350800	CYP93	0.29274	Down
Glyma.06G238500	CYP72	0.335466	Down
Glyma.11G197400	CYP79	0.339953	Down
Glyma.08G243600	CYP716	0.336244	Down
Glyma.15G243300	CYP72	0.380213	Down
Glyma.08G089400	CYP81	0.272228	Down
Glyma.13G072100	CYP75	0.414198	Down
Glyma.12G191400	CYP74	0.286836	Down
Glyma.11G122700	CYP74	0.363602	Down
Glyma.18G272300	CYP85	0.248894	Down
Glyma.10G200800	CYP76	0.148696	Down
Glyma.20G189600	CYP76	0.303883	Down
Glyma.13G120500	CYP94	0.273665	Down
Glyma.03G021600	CYP704	2.41981	Up
Glyma.17G227500	CYP711	2.19925	Up
Glyma.10G234700	CYP715	6.75126	Up
Glyma.20G159700	CYP715	12.1958	Up
Glyma.16G195600	CYP71	478.251	Up
Glyma.01G179600	CYP71	31.3607	Up
Glyma.05G042800	CYP71	4.79122	Up
Glyma.01G179400	CYP71	2.30531	Up
Glyma.02G156000	CYP71	20.4716	Up
Glyma.11G062600	CYP71	30.9451	Up
Glyma.14G015100	CYP71	3.5446	Up
Glyma.11G062500	CYP71	99.4057	Up
Glyma.17G118100	CYP734	2.98673	Up
Glyma.08G365000	CYP735	2.41981	Up
Glyma.20G114200	CYP73	3.62901	Up
Glyma.05G021900	CYP75	9.14687	Up
Glyma.05G022100	CYP75	6.09791	Up
Glyma.17G015400	CYP77	2.61339	Up
Glyma.05G147100	CYP78	4.79122	Up
Glyma.01G135200	CYP82	220.57	Up
Glyma.01G181800	CYP82	4.70411	Up
Glyma.06G035200	CYP82	2.83117	Up
Glyma.06G035300	CYP82	4.89021	Up
Glyma.13G068800	CYP82	23.1679	Up
Glyma.13G285300	CYP82	38.0183	Up
Glyma.15G203500	CYP82	32.9578	Up
Glyma.16G090000	CYP82	13.067	Up
Glyma.19G014600	CYP82	4.64603	Up
Glyma.08G140600	CYP736	15.1167	Up
Glyma.11G026200	CYP87	3.26674	Up
Glyma.16G057100	CYP94	2.61339	Up
Glyma.11G185700	CYP94	9.23132	Up
Glyma.12G087200	CYP94	14.247	Up
Glyma.10G203500	CYP76	10.0802	Up
Glyma.13G265300	CYP76	17.4226	Up
Glyma.18G223100	CYP76	9.14687	Up
Glyma.20G147900	CYP76	4.64603	Up
Glyma.20G148000	CYP76	18.0034	Up
Glyma.08G140500	CYP736	2.38614	Up
Glyma.16G008600	CYP92	2.44483	Up
Glyma.09G048700	CYP81	19.1649	Up
Glyma.09G048900	CYP81	49.306	Up
Glyma.09G049200	CYP81	135.738	Up
Glyma.09G049300	CYP81	165.764	Up
Glyma.15G156100	CYP81	153	Up
Glyma.03G143700	CYP93	21.8706	Up
Glyma.19G146800	CYP93	4.42825	Up
Glyma.19G144700	CYP93	5.82569	Up
Glyma.03G142100	CYP93	109.588	Up
Glyma.07G202300	CYP93	6.83961	Up
Glyma.13G173401	CYP93	6.92248	Up
Glyma.13G173500	CYP93	26.2256	Up
Glyma.15G245300	CYP72	23.1334	Up
Glyma.05G233200	CYP736	2.61339	Up
Glyma.07G089800	CYP736	6.25278	Up
Glyma.13G051600	CYP79	26.3517	Up
Glyma.09G049100	CYP81	26.4926	Up
Glyma.11G051800	CYP81	11.5529	Up
Glyma.01G153300	CYP707	6.60225	Up
Glyma.09G218600	CYP707	3.55807	Up
Glyma.16G076600	CYP707	8.05796	Up
Glyma.16G109300	CYP707	3.41751	Up
Glyma.15G095000	CYP710	3.56053	Up
Glyma.17G246500	CYP74	2.96582	Up
Glyma.03G160200	CYP94	3.83297	Up
Glyma.19G162100	CYP94	10.0402	Up
Glyma.08G125100	CYP716	2.19103	Up

## Sheet: 21 Common
21 Common genes DEGs in all bioprojects
Bold ones are already characterized
PRJNA544432	Fold Change (induction over water)
Gene ID	GmP450 Family	W82_Hairy_Roots_induction over water_24h		Harasoy63_Seeds_induction over water_48h
		FC	p-value	FC	p-value	Up or Down regulation
Glyma.01G061100	CYP78	#N/A	#N/A	#N/A	#N/A	Up
Glyma.01G135200	CYP82	#N/A	#N/A	#N/A	#N/A	Up
Glyma.03G142100	CYP93	#N/A	#N/A	#N/A	#N/A	Up
Glyma.05G147100	CYP78	#N/A	#N/A	#N/A	#N/A	Up
Glyma.09G048900	CYP81	#N/A	#N/A	#N/A	#N/A	Up
Glyma.09G049200	CYP81	#N/A	#N/A	#N/A	#N/A	Up
Glyma.09G049300	CYP81	#N/A	#N/A	#N/A	#N/A	Up
Glyma.11G062500	CYP71	#N/A	#N/A	#N/A	#N/A	Up
Glyma.11G062600	CYP71	#N/A	#N/A	#N/A	#N/A	Up
Glyma.13G068800	CYP82	#N/A	#N/A	#N/A	#N/A	Up
Glyma.13G173401	CYP93	#N/A	#N/A	#N/A	#N/A	Up
Glyma.13G173500	CYP93	#N/A	#N/A	#N/A	#N/A	Up
Glyma.13G265300	CYP76	#N/A	#N/A	#N/A	#N/A	Up
Glyma.13G285300	CYP82	#N/A	#N/A	#N/A	#N/A	Up
Glyma.15G156100	CYP81	#N/A	#N/A	#N/A	#N/A	Up
Glyma.16G008600	CYP92	#N/A	#N/A	#N/A	#N/A	Up
Glyma.16G195600	CYP71	#N/A	#N/A	#N/A	#N/A	Up
Glyma.17G227500	CYP711	#N/A	#N/A	#N/A	#N/A	Down
Glyma.19G014600	CYP82	#N/A	#N/A	#N/A	#N/A	Up
Glyma.19G146800	CYP93	#N/A	#N/A	#N/A	#N/A	Up
Glyma.20G114200	CYP73	#N/A	#N/A	#N/A	#N/A	Up
PRJNA574764		Fold Change in cultivars (Induction over mock) at different time points
Gene Id	GmP450 Family	Misty-4dpi (I/C)		Misty-7dpi (I/C)		Misty-14dpi (I/C)		PI 449459-4dpi (I/C)		PI 449459-7dpi (I/C)		PI 449459-14dpi (I/C)		PI 449459-21dpi (I/C)		Up or Down regulation
		FC	p-value	FC	p-value	FC	p-value	FC	p-value	FC	p-value	FC	p-value	FC	p-value
Glyma.01G061100	CYP78	0.0145856	0	0.0378774	1.4775e-10	0.0659201	3.68909e-06	0.0150089	2.79665e-13	0.0608565	4.34885e-12	0.00977235	0	0.184656	0.000107332	Down
Glyma.01G135200	CYP82	117.753	0	1.39666	0.397082	1.11227	0.810071	7.52061	0.000331861	6.7275	7.26884e-07	2.38407	0.000215555	0.79823	0.734261	Up
Glyma.03G142100	CYP93	2.36833	0.00176438	4.0837	0.00588031	0.357106	0.00428996	0.876497	0.681896	0.293712	9.54418e-08	0.155399	0	0.44222	0.00780056	Down
Glyma.05G147100	CYP78	0.223496	1.53653e-09	0.722299	0.437137	2.8949	0.015588	0.348773	0.000640074	0.389434	5.55474e-05	3.21738	5.0314e-08	2.84967	0.00530621	Up
Glyma.09G048900	CYP81	17.4377	0	9.69735	7.10507e-07	2.52554	0.034119	13.3767	8.54872e-15	8.90503	4.74065e-14	3.83853	9.43505e-09	1.06428	0.892548	Up
Glyma.09G049200	CYP81	210.16	0	10.967	3.78779e-08	7.58664	1.91622e-06	74.5513	0	6.54347	2.38606e-09	13.3592	0	0.628262	0.366908	Up
Glyma.09G049300	CYP81	39.0806	0	4.64685	0.00459151	3.46142	0.021294	19.0798	2.33147e-15	1.7491	0.0543264	4.81097	1.87418e-08	0.800323	0.602167	Up
Glyma.11G062500	CYP71	439.715	0	345.563	0	3.20027	0.0147514	39.0401	2.96455e-10	388.865	0	5.57586	1.66533e-15	1.16645	0.804643	Up
Glyma.11G062600	CYP71	135.917	0	19.698	2.19279e-07	1.34513	0.576084	14.3563	1.53318e-06	21.6127	0	4.00117	3.07783e-09	1.04034	0.937891	Up
Glyma.13G068800	CYP82	2.67706	0.0077623	0.670045	0.432355	0.167631	0.00211466	0.422563	0.149602	4.6535	2.34593e-09	1.82112	0.0200822	1.62085	0.365152	Down
Glyma.13G173401	CYP93	8.89339	3.79593e-10	3.09855	0.0521891	0.447292	0.118051	3.13387	0.0161103	0.904446	0.70945	0.860881	0.50728	0.412445	0.0551866	Up
Glyma.13G173500	CYP93	5.81173	2.34946e-08	2.28199	0.1579	0.393519	0.0869412	3.13501	0.0106646	0.73705	0.260013	0.699394	0.190698	0.448081	0.170564	Up
Glyma.13G265300	CYP76	15.8595	2.14748e-07	2.96727	0.0631203	0.409537	0.0657169	2.31263	0.119493	0.106431	3.10935e-08	0.223922	2.53898e-08	0.113112	0.0505134	Up
Glyma.13G285300	CYP82	38.4054	0	23.1046	1.0618e-07	0.971498	0.955876	9.53911	2.24733e-06	5.9056	5.34325e-11	1.23794	0.39853	0.30523	0.00558703	Up
Glyma.15G156100	CYP81	8083.93	0	26.6091	3.48912e-11	14.8582	1.8511e-06	142.253	1.56881e-11	38.7112	0	35.4666	0	0.61868	0.334082	Up
Glyma.16G008600	CYP92	4.04089	2.91445e-05	2.63638	0.0499886	0.852876	0.762962	2.31549	0.0146475	2.74552	2.20926e-05	0.67388	0.119039	0.80387	0.56329	Up
Glyma.16G195600	CYP71	617.247	0	41.393	4.74065e-13	6.5515	3.89507e-05	38.0054	1.06581e-14	11.3254	5.65881e-13	12.2815	0	1.5166	0.438171	Up
Glyma.17G227500	CYP711	13.0111	3.33067e-16	2.22555	0.212593	1.43777	0.395818	9.80157	2.37122e-06	0.633931	0.21123	1.97945	0.0147773	0.774335	0.510627	Up
Glyma.19G014600	CYP82	1.93474	0.0331225	0.734595	0.500327	0.0712834	7.45383e-11	0.205665	0.000966195	0.559311	0.0302732	0.786127	0.453809	0.704293	0.373319	Down
Glyma.19G146800	CYP93	164.344	7.01139e-12	36.4077	5.89735e-08	5.24089	9.0254e-05	31.3273	5.43443e-10	35.8296	2.5615e-05	8.54701	2.65066e-11	2.81907	0.133882	Up
Glyma.20G114200	CYP73	32.5198	0	1.61312	0.279693	1.14065	0.763146	5.21289	1.29682e-05	4.78626	8.25527e-09	1.44519	0.128091	0.573402	0.0637406	Up
PRJNA210431		Fold Change (inoculated over mock)											Differential gene expression while controlling for genotype
Gene Id	GmP450 family	Inoculated - Rps1-a	Inoculated - Rps1-b	Inoculated - Rps1-c	Inoculated - Rps1-k	Inoculated - Rps3-a	Inoculated - Rps3-b	Inoculated - Rps3-c	Inoculated - Rps4	Inoculated - Rps5	Inoculated - Rps6	Inoculated - Williams	Fold change	P-value	Up or Down regulation
Glyma.01G061100	CYP78	0.391664	0.396934	0.532269	0.476578	0.335606	0.37819	0.345268	0.355366	0.337326	0.339644	0.404796	0.420429	0	Down
Glyma.01G135200	CYP82	134.897	104.005	214.145	107.171	171.936	289.673	238.084	104.755	57.6528	41.8277	145.258	134.816	0	Up
Glyma.03G142100	CYP93	4.39594	12.8011	9.84282	6.17282	21.7263	17.2938	17.6944	14.843	10.7382	9.77612	5.79169	11.5516	0	Up
Glyma.05G147100	CYP78	3.34015	4.06385	0	2.02546	0	0	0	3.70494	3.88862	3.35568	13.0506	6.67988	1.08847e-11	Up
Glyma.09G048900	CYP81	119.132	59.8198	0	80.3431	295.309	392.42	501.026	60.514	38.2566	24.069	73.0691	95.3498	0	Up
Glyma.09G049200	CYP81	90.8202	28.6822	140.402	63.9553	73.4311	165.471	38.2021	32.1359	17.187	14.7428	31.0989	48.6382	0	Up
Glyma.09G049300	CYP81	151.049	184.905	263.236	39.1588	167.483	637.963	95.5611	47.3643	21.2745	19.2952	113.512	81.2361	0	Up
Glyma.11G062500	CYP71	65.272	63.338	127.138	91.5956	92.8116	148.002	90.938	55.5415	43.1123	17.4338	65.7341	70.6357	0	Up
Glyma.11G062600	CYP71	24.4682	16.7574	37.4844	24.5438	29.8961	39.2675	20.0711	19.3489	12.5453	9.3803	26.4598	23.6486	0	Up
Glyma.13G068800	CYP82	16.8863	16.2102	35.1658	6.4338	44.437	38.2958	34.5155	22.7737	9.60834	8.74697	23.6417	20.6627	0	Up
Glyma.13G173401	CYP93	0	25.7975	12.8389	3.75192	0	11.6517	24.0693	38.8816	5.15259	20.9675	54.6249	29.9227	0	Up
Glyma.13G173500	CYP93	6.20785	7.95971	14.9102	7.61112	13.1076	14.294	11.0761	11.0311	12.2101	7.03435	11.612	11.2327	0	Up
Glyma.13G265300	CYP76	0	2.43831	0	0	0	0	0	4.54697	3.88862	1.83514	0	7.95757	2.52135e-08	Up
Glyma.13G285300	CYP82	15.2306	14.8879	21.0088	18.8012	24.9433	34.0094	25.0622	17.1318	15.0451	10.2358	17.3588	20.2054	0	Up
Glyma.15G156100	CYP81	125.144	75.0651	237.749	72.0725	169.796	385.391	125.986	106.096	42.379	28.9519	99.0466	109.706	0	Up
Glyma.16G008600	CYP92	1.84641	1.67524	1.50478	1.15914	2.18426	2.33722	2.22089	2.24816	2.48596	2.02393	2.12141	2.13481	0	Up
Glyma.16G195600	CYP71	127.853	77.4453	763.841	0	427.496	540.647	141.109	48.6606	48.4678	47.7718	119.112	121.205	0	Up
Glyma.17G227500	CYP711	3.00129	3.87982	3.85646	2.01538	5.36533	6.46801	9.55852	3.85691	5.88848	2.37488	5.30629	4.6648	0	Up
Glyma.19G014600	CYP82	1.11338	0	0	1.3503	0	9.91186	6.25166	2.6945	5.70331	1.83514	5.77239	4.2354	5.94122e-09	Up
Glyma.19G146800	CYP93	7.79368	0	11.6656	3.60081	3.79684	15.0931	42.8685	28.2923	8.94383	9.58766	0	13.953	0	Up
Glyma.20G114200	CYP73	17.3217	11.792	15.4654	12.1527	5.61549	20.3439	17.4337	17.416	8.65753	8.29041	19.5053	14.2031	0	Up
PRJNA318321
		Fold Change in Williams82 cultivar (induction over mock) at hours post inoculation (hpi)
Gene Id	GmP450 Family	0.5hpi	3hpi	6hpi	12hpi	Up or Down regulation
Glyma.01G061100	CYP78	2.03205	1.21837	0.75565	0.25846	Up/Down
Glyma.01G135200	CYP82	1.65207	69.987	780.727	592.046	Up
Glyma.03G142100	CYP93	19.3764	22.3289	7.32861	6.42458	Up
Glyma.05G147100	CYP78	1.69927	1.71669	3.8862	5.24305	Up
Glyma.09G048900	CYP81	3.02329	20.5788	102.643	46.9881	Up
Glyma.09G049200	CYP81	0.330414	20.0281	284.057	134.606	Up
Glyma.09G049300	CYP81	0.849637	14.5919	185.674	82.1165	Up
Glyma.11G062500	CYP71	117.958	1049.47	3350.05	3091.18	Up
Glyma.11G062600	CYP71	23.6577	224.448	693.922	439.658	Up
Glyma.13G068800	CYP82	1.67272	7.135	10.2852	9.97225	Up
Glyma.13G173401	CYP93	4.94344	6.11354	9.94174	10.068	Up
Glyma.13G173500	CYP93	4.55954	7.51342	12.1621	12.1192	Up
Glyma.13G265300	CYP76	0.524981	2.45895	4.17185	1.49329	Up
Glyma.13G285300	CYP82	25.0374	92.4572	149.41	147.251	Up
Glyma.15G156100	CYP81	6.04034	110.822	2272.32	2061.82	Up
Glyma.16G008600	CYP92	3.18231	1.83935	1.89817	5.99262	Up
Glyma.16G195600	CYP71	4.04758	128.764	336.936	266.903	Up
Glyma.17G227500	CYP711	1.1363	1.70971	1.99049	1.1347	Up
Glyma.19G014600	CYP82	1.20151	3.15594	6.28945	4.292	Up
Glyma.19G146800	CYP93	0.330414	8.34503	352.637	55.8274	Up
Glyma.20G114200	CYP73	67.4045	63.9229	85.0527	70.5596	Up
PRJNA478334		Fold Change in Different Cultivars (Infected over mock)
Gene Id	GmP450 Family	12011	12013	12016	12019	12028	12029	12030	12038	12042	12049	12051	12053	12054	12056	12057	12061	12063	12065	12068	12069	12071	12073	12074	12075	12076	12082	12090	12091	12092	12099	12100	12101	12104	12108	12109	12122	12124	12132	12133	12137	12141	12144	12147	12150	12151	12154	12157	12158
Glyma.01G061100	CYP78	0.175077	0.14606	0.205365	1.5732	0.868071	0.576403	0.584924	1.8843	0.444901	0.770017	0.696708	0.423835	0.173485	0.234249	0.514289	0.257486	0.506731	0.500589	1.28573	1.18125	1.08149	0.745971	1.29139	0.344941	0.210348	0.186927	0.113359	0.212306	1.11158	0.793948	5.78027	0.892227	2.02856	0.704594	1.39183	1.355	0.53288	0.233011	0.197741	0.155742	0.225349	0.631681	0.707338	0.896653	1.15716	0.603026	0.293256	0.899389
Glyma.01G135200	CYP82	5.15403	0.709388	62.851	8.4859	12.804	6.3801	15.9458	5.97675	12.109	12.8921	21.726	7.38209	0.166857	64.4784	0.132227	4.83922	5.83843	3.30318	6.4312	11.153	6.16826	8.69802	4.75026	5.88748	5.7559	0.324124	0.045933	10.7085	23.3634	4.63252	64.5539	8.10022	4.15927	5.37056	3.20424	7.14974	0.102117	0.958082	2.5137	7.08402	6.94732	25.5885	11.2831	5.30132	4.73741	11.8642	9.1901	11.3593
Glyma.03G142100	CYP93	0.0690053	0.119934	0.0400166	2.08282	1.53885	3.1098	2.51864	1.88016	2.48317	2.11959	3.55321	1.29664	0.0639349	0.232193	18.2757	0.050197	1.74541	1.2531	2.26193	1.61818	2.04282	1.93289	1.5937	1.63964	5.86881	0.0717236	18.8371	0.554052	4.41816	1.03558	24.6953	2.18636	1.28329	1.82599	1.18095	2.18854	0.0886494	0.0631702	1.41037	0.0640219	1.36045	2.75298	1.83459	1.57841	3.59313	2.51824	1.86481	2.40942
Glyma.05G147100	CYP78	0.256937	0.267941	1.03979	1.46884	0.719259	3.03764	2.37293	3.17975	0.566237	0.775083	1.02648	0.530057	0.3461	0.670364	0.566066	0.244762	2.89561	0.819677	1.06927	0.892136	1.96635	0.63822	1.62878	0.432473	0.368725	0.232582	0.130858	0.268733	0.776914	1.38941	3.97846	0.495682	0.816061	1.07243	2.26173	1.32843	0.418949	0.219832	0.180123	0.204388	0.790186	1.21897	0.734897	0.690471	1.26138	1.97354	1.02273	1.03552
Glyma.09G048900	CYP81	2.10256	0.0823396	0.0570555	5.61858	4.4532	3.7378	5.27802	3.99418	6.06238	5.14725	9.03656	3.37047	0.0285986	17.4399	1.7768	7.87497	5.37915	1.69142	5.19405	4.65512	2.40108	2.96048	2.46814	2.69391	8.5885	1.15597	0.124687	0.118949	5.97879	1.74912	0.864304	3.86754	2.81839	3.18128	1.08698	3.12764	9.22586	0.0185636	6.96892	2.17406	2.57363	4.7727	3.39304	2.01811	4.12092	3.23413	1.97403	3.36752
Glyma.09G049200	CYP81	1.46671	0.01846	0.906211	2.57918	2.64942	2.58771	4.37262	2.31164	2.3217	2.34629	4.43521	2.87704	4.74116	8.58973	0.0302434	1.3944	2.02205	1.37023	2.12733	2.61803	1.63647	1.71609	1.95454	1.19646	1.66603	3.45984	0.0218182	1.28626	3.92505	1.38898	1.35712	2.37465	1.69514	2.0027	1.95194	1.93464	0.813007	0.360467	0.75503	0.750569	1.66122	3.50885	2.24341	1.44592	1.79591	2.30419	2.93684	2.32999
Glyma.09G049300	CYP81	2.8273	0.313405	0.184275	7.17932	5.5529	4.65163	6.76983	4.88566	9.42709	19.7667	6.80733	4.79587	26.125	0.217808	0.103377	0.149963	4.06003	4.28255	4.28001	4.18437	4.37104	3.29937	10.5056	10.6561	0.0853099	3.59355	0.0332467	0.0735276	29.2134	4.10985	77.9585	15.5013	2.86483	6.30784	4.35315	6.34182	1.57181	2.00775	3.17112	11.242	4.90903	6.35122	4.71327	2.66585	4.15816	10.9992	5.56413	17.9253
Glyma.11G062500	CYP71	1.52523	0.0700523	0.0397424	4.72694	3.63801	4.05703	6.29873	3.17217	5.66804	4.95586	8.08996	3.00044	3.60123	13.2976	0.123603	6.47256	3.61174	2.52997	3.71961	4.61235	2.56401	2.66685	3.23917	3.95067	5.92387	24.5971	0.0392237	8.58512	8.96439	2.74653	74.466	5.3038	2.37165	3.30348	2.13304	3.7665	2.28166	0.21985	1.81328	9.82422	3.30084	6.07467	3.68612	2.18815	3.05698	5.18234	6.08838	5.35079
Glyma.11G062600	CYP71	1.04277	6.38449	8.0414	3.56865	2.96018	3.4131	4.09934	2.78949	3.7295	3.10915	5.15603	3.17831	0.0628167	0.0104643	0.0346693	2.05396	2.23033	1.87491	2.4525	2.55394	2.13969	2.03812	2.00883	1.86054	1.38856	3.05175	0.115402	2.68438	5.01369	1.69845	2.49854	3.24029	1.58366	2.14074	2.34368	3.06126	0.767431	0.128375	1.72885	2.2079	2.35439	3.52779	2.22405	1.63182	2.30073	3.33358	3.36773	3.09539
Glyma.13G068800	CYP82	4.97605	0.892455	0.20666	3.24691	8.97007	5.5839	14.0747	10.466	10.5206	5.32136	16.5816	12.2244	0.800913	6.95484	2.93638	5.58654	16.7221	3.89932	7.71568	8.27273	4.68647	5.02047	5.02595	5.48468	14.2274	2.77492	0.0800895	14.171	5.00042	1.32325	2.30086	7.47885	6.18228	8.44329	2.82644	7.17354	212.195	0.152046	1.20429	1.10264	4.29335	11.3522	9.94561	3.51236	7.88524	10.2514	5.68183	6.31313
Glyma.13G173401	CYP93	18.5587	1	12.5472	3.36103	2.64798	3.54392	68.0986	7.66298	47.7747	3.5896	2.6151	8.79163	6.28454	5.23418	3.71593	610.797	2.13087	0.530852	32.2536	4.83241	1.24145	31.6567	0.954273	2.3342	309.287	12.5402	25.347	9.66137	5.5855	4.6049	1.08749	2.68609	1.57501	1.16326	2.27784	1.09974	26.5243	0.853292	18.0372	1	3.79428	7.48947	1.38559	0.704667	2.17854	4.2474	6.14834	5.94715
Glyma.13G173500	CYP93	1.32627	0.0739983	1.46792	4.05947	3.37474	3.90982	4.19604	3.57869	4.15133	4.17049	5.39156	2.76807	0.959518	9.63363	0.102052	4.71635	5.20895	4.04704	3.21852	3.19037	3.20697	2.82076	2.61329	2.59522	1.12501	1.20686	4.77681	1.2614	9.25003	1.99909	466.279	4.76272	1.79605	3.38869	2.07524	2.63784	4.75063	0.00435551	2.61857	2.82657	2.31122	4.96833	3.07474	1.77297	3.00855	3.19008	3.255	3.05509
Glyma.13G265300	CYP76	1.38625	5.78246	2.6714	3.06137	1.04169	1.78685	15.3543	1.31901	4.44901	3.17632	2.36881	2.29691	0.569082	1.72228	1.45432	1.84459	1.59258	0.73771	1.10583	3.27117	3.15436	1.64114	4.88634	0.676914	0.601826	1.83247	0.612627	1.38084	2.09169	2.77882	2.16795	2.37927	1.39101	1.498	2.01043	0.569328	1.20552	1.05427	0.488011	19.2646	0.938646	4.72497	1.91073	0.838429	4.71131	1.80908	1.61617	6.96301
Glyma.13G285300	CYP82	2.49284	4.00012	2.34693	3.35047	1.9285	3.88726	4.26724	2.87199	4.02045	3.81658	3.50469	2.91933	1.72232	20.9213	0.108582	1.75077	3.1	1.57433	2.72536	2.10085	1.67057	2.17384	1.76263	2.59659	2.62273	0.722996	4.86358	4.40764	5.21681	1.75482	2.25738	3.37812	1.6328	2.11516	2.08099	2.27314	3.66339	0.423996	1.26852	4.02173	3.01767	3.47352	2.22294	1.75468	2.63194	3.39953	3.68501	2.43535
Glyma.15G156100	CYP81	2.17661	0.140794	0.144182	8.24119	5.26268	5.01776	9.61339	5.21977	6.54553	10.6755	12.6222	5.47643	0.0856591	58.0859	0.0874732	7.73477	6.17115	3.08933	6.26467	7.74227	4.09545	5.06445	3.76079	3.51189	3.92781	0.169542	9.38181	7.43082	15.6996	2.19084	166.306	7.11393	3.03279	4.00081	4.04708	4.34101	3.95394	0.379241	4.91971	11.3163	3.81045	12.4373	6.18921	2.9345	4.82402	7.55776	9.09093	9.84106
Glyma.16G008600	CYP92	3.95313	0.0319056	0.365961	3.78926	1.05059	3.81979	3.03044	3.56781	2.71884	3.4974	2.47648	4.05488	0.0308824	3.55616	0.136677	2.20867	4.30234	1.73729	1.70983	2.55128	1.78257	2.62926	1.39858	2.28443	0.253307	0.0184679	0.0289659	3.22002	5.70461	1.57772	52.0537	2.47688	1.82692	2.55523	1.42589	2.23095	1.04529	0.213657	1.23701	1.17946	2.32948	3.32288	3.27749	1.89219	2.42354	2.39379	2.54752	2.49612
Glyma.16G195600	CYP71	1.7308	22.2866	0.0765409	3.54768	3.61392	3.15025	3.99722	3.63531	4.32498	3.19214	7.01413	3.5274	0.0440062	0.143715	0.0359858	3.22326	3.12093	2.39447	2.89755	3.65127	2.42283	2.8416	3.03019	3.06983	5.66873	8.56247	19.1437	0.0490768	5.26068	2.17975	1.76156	4.18267	2.64714	3.44039	2.57133	3.91402	2.26946	0.0233466	2.37949	4.18849	2.75388	5.85107	4.23446	2.0086	3.18456	4.94553	5.05767	3.85535
Glyma.17G227500	CYP711	4.91705	0.714158	0.412411	1.30214	1.15743	1.41897	1.39833	1.01281	1.10335	2.44594	1.34525	0.628916	0.425964	0.447809	0.342124	2.49676	0.923377	2.88377	1.27157	1.88448	0.730739	0.699003	1.13157	0.962204	8.2519	0.543163	1.04763	0.620145	1.93079	1.15784	4.20034	0.960057	0.818243	1.72323	0.472145	1.30047	0.57264	0.781239	0.73665	0.481765	1.03797	0.845003	1.09981	0.529841	0.589982	1.06049	0.830529	1.34102
Glyma.19G014600	CYP82	0.422682	0.480856	0.81454	1.48817	1.51912	1.86807	1.68897	2.94421	2.11328	5.19761	7.36962	1.64065	1.00114	3.15087	0.33258	0.562437	2.15361	1.68619	1.70901	1.9627	2.05999	2.15399	1.42831	4.9004	0.779891	0.419056	0.210147	0.631553	3.94433	1.19092	3.38575	1.90342	1.18025	2.26403	0.84737	6.11079	0.306313	0.413304	0.377724	0.555053	1.28093	2.64334	2.45343	0.448327	1.56217	1.58294	12.5069	1.50865
Glyma.19G146800	CYP93	0.704751	5.14453	2.37669	7.65342	15.8423	2.68027	8.06098	4.83636	14.5334	32.9182	40.2697	2.71453	1.68767	1	0.862587	0.652561	8.1077	1.76231	9.65088	4.90675	6.90954	27.8993	1.41161	6.84435	21.3411	61.3984	0.817561	0.546003	14.8809	4.33063	8.1806	19.4307	2.78203	5.3111	2.65011	5.38015	0.446884	0.803965	18.6492	2.42932	5.05719	6.66922	5.48723	6.35809	5.67217	6.10564	2.92012	24.1384
Glyma.20G114200	CYP73	12.5393	20.5849	0.0294108	3.43273	2.84805	3.97155	2.05618	4.28474	3.6938	3.65974	2.29761	3.0147	0.0361639	0.0327139	0.0354055	0.0240329	1.86054	1.45972	2.31339	2.84075	1.3545	2.84785	1.71186	1.88384	0.127791	3.63971	0.0317677	0.979255	4.85228	1.86944	45.8693	3.93902	3.18692	2.13665	3.91932	2.8184	1.78315	52.802	0.0314092	5.76243	2.81751	2.1308	3.02721	3.14083	3.21623	2.5844	4.3424	2.98703
PRJNA324419
Gene Id	GmP450 Family	Fold Change in Williams cultivar (Induction over mock) at 24h	Up or Down regulation
Glyma.01G061100	CYP78	0.299782	Down
Glyma.01G135200	CYP82	220.57	Up
Glyma.03G142100	CYP93	109.588	Up
Glyma.05G147100	CYP78	4.79122	Up
Glyma.09G048900	CYP81	49.306	Up
Glyma.09G049200	CYP81	135.738	Up
Glyma.09G049300	CYP81	165.764	Up
Glyma.11G062500	CYP71	99.4057	Up
Glyma.11G062600	CYP71	30.9451	Up
Glyma.13G068800	CYP82	23.1679	Up
Glyma.13G173401	CYP93	6.92248	Up
Glyma.13G173500	CYP93	26.2256	Up
Glyma.13G265300	CYP76	17.4226	Up
Glyma.13G285300	CYP82	38.0183	Up
Glyma.15G156100	CYP81	153	Up
Glyma.16G008600	CYP92	2.44483	Up
Glyma.16G195600	CYP71	478.251	Up
Glyma.17G227500	CYP711	2.19925	Up
Glyma.19G014600	CYP82	4.64603	Up
Glyma.19G146800	CYP93	4.42825	Up
Glyma.20G114200	CYP73	3.62901	Up
[truncated: 50 more columns]

## Sheet: Common DEGs
Common genes among bioprojects
GmP450 Family	Gene ID	Predicted Function	Characterized or not
Common genes among bioprojects - PRJNA210431, PRJNA318321, PRJNA544432, PRJNA478334, PRJNA324419, PRJNA574764-common.21
CYP93	Glyma.13G173500	Flavonoid Metabolism	Characterized
CYP93	Glyma.13G173401	Flavonoid Metabolism
CYP82	Glyma.13G068800	Jasmonic Acid and Ethylene Signaling Pathway	Characterized
CYP92	Glyma.16G008600	Reported in plant defence response (terpenoid defense)
CYP76	Glyma.13G265300	Metabolism of both natural and xenobiotic compounds/Sesquiterpene Biosynthesis santalols and bergamotol
CYP73	Glyma.20G114200	Phenylpropanoid Pathway (C4H)
CYP81	Glyma.09G048900	Phenylpropanoid Pathway
CYP78	Glyma.01G061100	Reported for organ growth
CYP78	Glyma.05G147100	Reported for organ growth
CYP711	Glyma.17G227500	Strigolactone signaling pathway and may be implicated in synthesis of carotenoid-derived branch regulators
CYP82	Glyma.13G285300	Jasmonic Acid and Ethylene Signaling Pathway
CYP71	Glyma.16G195600	Phenylpropanoid Pathway (Camaxlin Biosynthesis)
CYP93	Glyma.03G142100	Flavonoid Metabolism
CYP71	Glyma.11G062600	Phenylpropanoid Pathway (Camaxlin Biosynthesis)
CYP81	Glyma.15G156100	Phenylpropanoid Pathway
CYP71	Glyma.11G062500	Phenylpropanoid Pathway (Camaxlin Biosynthesis)
CYP82	Glyma.01G135200	Jasmonic Acid and Ethylene Signaling Pathway
CYP81	Glyma.09G049200	Phenylpropanoid Pathway
CYP82	Glyma.19G014600	Jasmonic Acid and Ethylene Signaling Pathway
CYP81	Glyma.09G049300	Phenylpropanoid Pathway
CYP93	Glyma.19G146800	Flavonoid Metabolism
Common genes among bioprojects - PRJNA210431, PRJNA318321, PRJNA544432, PRJNA324419, PRJNA574764-common.15
CYP81	Glyma.11G051800	Phenylpropanoid Pathway
CYP82	Glyma.15G203500	Jasmonic Acid and Ethylene Signaling Pathway
CYP93	Glyma.03G143700	Flavonoid Metabolism	Characterized
CYP81	Glyma.09G048700	Phenylpropanoid Pathway
CYP74	Glyma.11G122700	May play a defensive role against soil-borne pests that affect roots (Allene oxide synthase 3)
CYP94	Glyma.13G120500	Jasmonoyl-isoleucine for catabolic turnover
CYP71	Glyma.14G015100	Phenylpropanoid Pathway (Camaxlin Biosynthesis)
CYP94	Glyma.19G162100	Jasmonoyl-isoleucine for catabolic turnover
CYP93	Glyma.07G202300	Flavonoid Metabolism	Characterized
CYP75	Glyma.05G022100	Phenylpropanoid Pathway (F3'H, F3',5' H)
CYP736	Glyma.08G140600	Phytoalexin (Aucuparin) Biosynthesis in Apple
CYP81	Glyma.09G049100	Phenylpropanoid Pathway
CYP736	Glyma.07G089800	Phytoalexin (Aucuparin) Biosynthesis in Apple
CYP71	Glyma.02G156000	Phenylpropanoid Pathway (Camaxlin Biosynthesis)
CYP93	Glyma.19G144700	Flavonoid Metabolism
Common genes among bioprojects - PRJNA210431, PRJNA318321, PRJNA478334, PRJNA324419, PRJNA574764-common.7
CYP707	Glyma.01G153300	ABA 8’-hydroxylase
CYP82	Glyma.16G090000	Jasmonic Acid and Ethylene Signaling Pathway
CYP72	Glyma.15G243300	Confers tolerance to acetolactate synthase-inhibiting herbicides in Arabidopsis and rice	Characterized
CYP715	Glyma.20G159700	Key regulator of flower maturation, synchronizing petal expansion and volatile emission
CYP76	Glyma.20G147900	Metabolism of both natural and xenobiotic compounds/Sesquiterpene Biosynthesis santalols and bergamotol
CYP76	Glyma.10G200800	Metabolism of both natural and xenobiotic compounds/Sesquiterpene Biosynthesis santalols and bergamotol
CYP83	Glyma.03G030800	Oxime Biosynthesis
Common genes among bioprojects - PRJNA210431, PRJNA318321, PRJNA544432, PRJNA478334, PRJNA574764-common.2
CYP734	Glyma.05G010200	BRs inactivation
CYP94	Glyma.03G160100	Jasmonoyl-isoleucine for catabolic turnover
Common genes among bioprojects - PRJNA210431, PRJNA544432, PRJNA478334, PRJNA324419, PRJNA574764-common.1
CYP71	Glyma.05G042800	Phenylpropanoid Pathway (Camaxlin Biosynthesis)
Common genes among bioprojects - PRJNA210431, PRJNA318321, PRJNA324419, PRJNA574764-common.11
CYP94	Glyma.11G185700	Jasmonoyl-isoleucine for catabolic turnover
CYP82	Glyma.01G181800	Jasmonic Acid and Ethylene Signaling Pathway
CYP714	Glyma.06G140000	Gibberellin Biosynthesis
CYP82	Glyma.06G035300	Jasmonic Acid and Ethylene Signaling Pathway
CYP94	Glyma.03G160200	Jasmonoyl-isoleucine for catabolic turnover
CYP72	Glyma.15G245300	Confers tolerance to acetolactate synthase-inhibiting herbicides in Arabidopsis and rice
CYP71	Glyma.06G176200	Phenylpropanoid Pathway (Camaxlin Biosynthesis)
CYP75	Glyma.05G021900	Phenylpropanoid Pathway (F3'H, F3',5' H)
CYP71	Glyma.20G007000	Phenylpropanoid Pathway (Camaxlin Biosynthesis)
CYP71	Glyma.01G179600	Phenylpropanoid Pathway (Camaxlin Biosynthesis)
CYP94	Glyma.12G087200	Jasmonoyl-isoleucine for catabolic turnover
Common genes among bioprojects - PRJNA318321, PRJNA544432, PRJNA478334, PRJNA574764-common.10
CYP71	Glyma.18G080200	Phenylpropanoid Pathway (Camaxlin Biosynthesis)
CYP736	Glyma.09G186400	Phytoalexin (Aucuparin) Biosynthesis in Apple
CYP86	Glyma.14G192500	Suberin Biosynthesis	Characterized
CYP86	Glyma.11G175900	Suberin Biosynthesis
CYP96	Glyma.19G003600	Reported for Wax biosynthesis
CYP78	Glyma.07G052300	Reported for organ growth
CYP74	Glyma.07G162900	May play a defensive role against soil-borne pests that affect roots (Allene oxide synthase 3)
CYP78	Glyma.08G104100	Reported for organ growth
CYP86	Glyma.11G100100	Suberin Biosynthesis
CYP71	Glyma.06G176100	Phenylpropanoid Pathway (Camaxlin Biosynthesis)	Characterized
Common genes among bioprojects - PRJNA318321, PRJNA478334, PRJNA324419, PRJNA574764-common.6
CYP710	Glyma.15G095000	Stigmasterol conversion that help in plant-pathogen interactions
CYP72	Glyma.08G238100	Confers tolerance to acetolactate synthase-inhibiting herbicides in Arabidopsis and rice
CYP716	Glyma.08G243600	triterpenoid biosynthesis
CYP93	Glyma.08G350800	Flavonoid Metabolism	Characterized
CYP79	Glyma.13G051600	biosynthesis of the cyanogenic glucoside
CYP78	Glyma.19G258700	Reported for organ growth
Common genes among bioprojects - PRJNA210431, PRJNA544432, PRJNA324419, PRJNA574764-common.3
CYP76	Glyma.10G203500	Metabolism of both natural and xenobiotic compounds/Sesquiterpene Biosynthesis santalols and bergamotol
CYP75	Glyma.13G072100	Phenylpropanoid Pathway (F3'H, F3',5' H)	Characterized
CYP85	Glyma.18G272300	Brassinosteroid biosynthetic
Common genes among bioprojects - PRJNA210431, PRJNA318321, PRJNA478334, PRJNA574764-common.2
CYP78	Glyma.17G080500	Reported for organ growth
CYP85	Glyma.19G033900	Brassinosteroid biosynthetic
Common genes among bioprojects - PRJNA210431, PRJNA318321, PRJNA544432, PRJNA574764-common.2
CYP90	Glyma.08G193900	Brassinosteroid biosynthetic
CYP93	Glyma.10G092500	Flavonoid Metabolism
Common genes among bioprojects - PRJNA318321, PRJNA544432, PRJNA324419, PRJNA574764-common.2
CYP94	Glyma.13G152202	Jasmonoyl-isoleucine for catabolic turnover
CYP87	Glyma.11G026200	Terpenoid biosynthesis
Common genes among bioprojects - PRJNA210431, PRJNA478334, PRJNA324419, PRJNA574764-common.1
CYP76	Glyma.18G223100	Metabolism of both natural and xenobiotic compounds/Sesquiterpene Biosynthesis santalols and bergamotol
Common genes among bioprojects - PRJNA210431, PRJNA544432, PRJNA478334, PRJNA574764-common.1
CYP71	Glyma.01G179700	Phenylpropanoid Pathway (Camaxlin Biosynthesis)
Common genes among bioprojects - PRJNA544432, PRJNA478334, PRJNA324419, PRJNA574764-common.1
CYP707	Glyma.16G076600	ABA 8’-hydroxylase
Common genes among bioprojects - PRJNA318321, PRJNA544432, PRJNA574764-common.14
CYP84	Glyma.11G074100	Ferulate-5-hydroxylase (F5H), regulate sinapine accumulation
CYP707	Glyma.09G282900	ABA 8’-hydroxylase
CYP84	Glyma.01G169200	Ferulate-5-hydroxylase (F5H), regulate sinapine accumulation
CYP74	Glyma.14G078600	May play a defensive role against soil-borne pests that affect roots (Allene oxide synthase 3)
CYP90	Glyma.14G059900	Brassinosteroid biosynthetic
CYP78	Glyma.16G021200	Reported for organ growth
CYP87	Glyma.01G216900	Terpenoid biosynthesis
CYP93	Glyma.10G092600	Flavonoid Metabolism
CYP71	Glyma.10G115500	Phenylpropanoid Pathway (Camaxlin Biosynthesis)
CYP72	Glyma.03G226800	Confers tolerance to acetolactate synthase-inhibiting herbicides in Arabidopsis and rice
CYP716	Glyma.05G220500	triterpenoid biosynthesis
CYP84	Glyma.16G131200	Ferulate-5-hydroxylase (F5H), regulate sinapine accumulation
CYP82	Glyma.04G035500	Jasmonic Acid and Ethylene Signaling Pathway
CYP90	Glyma.01G175500	Brassinosteroid biosynthetic
Common genes among bioprojects - PRJNA318321, PRJNA324419, PRJNA574764-common.12
CYP716	Glyma.08G125100	triterpenoid biosynthesis
CYP707	Glyma.16G109300	ABA 8’-hydroxylase
CYP90	Glyma.02G256800	Brassinosteroid biosynthetic
CYP735	Glyma.08G365000	In Arabidopsis encode cytokinin hydroxylases, which catalyze the biosynthesis of trans-zeatins
CYP707	Glyma.09G218600	ABA 8’-hydroxylase	Characterized
CYP736	Glyma.05G233200	Phytoalexin (Aucuparin) Biosynthesis in Apple
CYP76	Glyma.03G021200	Metabolism of both natural and xenobiotic compounds/Sesquiterpene Biosynthesis santalols and bergamotol
CYP94	Glyma.16G057100	Jasmonoyl-isoleucine for catabolic turnover
CYP74	Glyma.17G246500	May play a defensive role against soil-borne pests that affect roots (Allene oxide synthase 3)	Characterized
CYP72	Glyma.06G238500	Confers tolerance to acetolactate synthase-inhibiting herbicides in Arabidopsis and rice
CYP736	Glyma.08G140500	Phytoalexin (Aucuparin) Biosynthesis in Apple
CYP715	Glyma.10G234700	Key regulator of flower maturation, synchronizing petal expansion and volatile emission
Common genes among bioprojects - PRJNA210431, PRJNA318321, PRJNA574764-common.9
CYP706	Glyma.17G134100	Synthesis of gossypol and related sesquiterpene
CYP71	Glyma.18G080300	Phenylpropanoid Pathway (Camaxlin Biosynthesis)
CYP90	Glyma.18G028300	Brassinosteroid biosynthetic
CYP78	Glyma.05G019200	Reported for organ growth	Characterized
CYP720	Glyma.09G160900	Resin acid biosynthesis
CYP88	Glyma.15G135200	Gibberellin metabolic
CYP728	Glyma.18G052400	-
CYP710	Glyma.13G217400	Stigmasterol conversion that help in plant-pathogen interactions
CYP736	Glyma.07G089700	Phytoalexin (Aucuparin) Biosynthesis in Apple
Common genes among bioprojects - PRJNA318321, PRJNA478334, PRJNA574764-common.9
CYP76	Glyma.07G083000	Metabolism of both natural and xenobiotic compounds/Sesquiterpene Biosynthesis santalols and bergamotol
CYP71	Glyma.10G114600	Phenylpropanoid Pathway (Camaxlin Biosynthesis)
CYP83	Glyma.03G029900	Oxime Biosynthesis
CYP89	Glyma.20G018800	Chlorophyll breakdown
CYP728	Glyma.02G290000	-
CYP97	Glyma.18G239900	Biosynthesis of Carotenoids
CYP71	Glyma.09G279100	Phenylpropanoid Pathway (Camaxlin Biosynthesis)
CYP71	Glyma.20G007100	Phenylpropanoid Pathway (Camaxlin Biosynthesis)
CYP82	Glyma.19G014700	Jasmonic Acid and Ethylene Signaling Pathway
Common genes among bioprojects - PRJNA544432, PRJNA478334, PRJNA574764-common.4
CYP714	Glyma.07G118200	Gibberellin Biosynthesis
CYP71	Glyma.18G080400	Phenylpropanoid Pathway (Camaxlin Biosynthesis)	Characterized
CYP71	Glyma.10G115400	Phenylpropanoid Pathway (Camaxlin Biosynthesis)
CYP71	Glyma.17G125400	Phenylpropanoid Pathway (Camaxlin Biosynthesis)
Common genes among bioprojects - PRJNA210431, PRJNA324419, PRJNA574764-common.3
CYP96	Glyma.19G057300	Reported for Wax biosynthesis
CYP76	Glyma.20G148000	Metabolism of both natural and xenobiotic compounds/Sesquiterpene Biosynthesis santalols and bergamotol
CYP704	Glyma.03G021600	Anther cutin biosynthesis and pollen exine formation
Common genes among bioprojects - PRJNA478334, PRJNA324419, PRJNA574764-common.2
CYP79	Glyma.11G197400	biosynthesis of the cyanogenic glucoside
CYP71	Glyma.01G179400	Phenylpropanoid Pathway (Camaxlin Biosynthesis)
Common genes among bioprojects - PRJNA210431, PRJNA478334, PRJNA574764-common.1
CYP715	Glyma.16G182600	Key regulator of flower maturation, synchronizing petal expansion and volatile emission
Common genes among bioprojects - PRJNA210431, PRJNA544432, PRJNA324419-common.1
CYP83	Glyma.03G030900	Oxime Biosynthesis
Common genes among bioprojects - PRJNA210431, PRJNA544432, PRJNA574764-common.1
CYP736	Glyma.07G089900	Phytoalexin (Aucuparin) Biosynthesis in Apple
Common genes among bioprojects - PRJNA318321, PRJNA544432, PRJNA324419-common.1
CYP71	Glyma.04G110400	Phenylpropanoid Pathway (Camaxlin Biosynthesis)
Common genes among bioprojects - PRJNA318321, PRJNA544432, PRJNA478334-common.1
CYP82	Glyma.11G060100	Jasmonic Acid and Ethylene Signaling Pathway
Common genes among bioprojects - PRJNA544432, PRJNA324419, PRJNA574764-common.1
CYP76	Glyma.20G189600	Metabolism of both natural and xenobiotic compounds/Sesquiterpene Biosynthesis santalols and bergamotol
Common genes among bioprojects - PRJNA318321, PRJNA574764-common.42
CYP82	Glyma.13G068500	Jasmonic Acid and Ethylene Signaling Pathway
CYP73	Glyma.02G236500	Phenylpropanoid Pathway (C4H)
CYP92	Glyma.07G039800	Reported in plant defence response (terpenoid defense)
CYP735	Glyma.18G297200	In Arabidopsis encode cytokinin hydroxylases, which catalyze the biosynthesis of trans-zeatins
CYP74	Glyma.04G035000	May play a defensive role against soil-borne pests that affect roots (Allene oxide synthase 3)
CYP76	Glyma.03G189900	Metabolism of both natural and xenobiotic compounds/Sesquiterpene Biosynthesis santalols and bergamotol
CYP721	Glyma.17G249400	-
CYP51	Glyma.07G110900	Synthesis of antimicrobial triterpenes
CYP736	Glyma.09G186200	Phytoalexin (Aucuparin) Biosynthesis in Apple
CYP722	Glyma.04G030100	Strigolactone biosynthesis
CYP98	Glyma.19G126000	Synthesis of suberin phenolic monomers
CYP81	Glyma.09G048800	Phenylpropanoid Pathway
CYP706	Glyma.07G218200	Synthesis of gossypol and related sesquiterpene
CYP83	Glyma.11G168428	Oxime Biosynthesis
CYP77	Glyma.07G258800	In potato tubers take part in the synthesis of cutin and suberin monomers
CYP718	Glyma.02G287300	-
CYP75	Glyma.06G202300	Phenylpropanoid Pathway (F3'H, F3',5' H)	Characterized
CYP72	Glyma.13G262100	Confers tolerance to acetolactate synthase-inhibiting herbicides in Arabidopsis and rice
CYP90	Glyma.11G228900	Brassinosteroid biosynthetic
CYP71	Glyma.07G267100	Phenylpropanoid Pathway (Camaxlin Biosynthesis)
CYP727	Glyma.06G310800	-
CYP712	Glyma.19G144600	-
CYP704	Glyma.07G083300	Anther cutin biosynthesis and pollen exine formation
CYP82	Glyma.16G089700	Jasmonic Acid and Ethylene Signaling Pathway
CYP83	Glyma.17G255900	Oxime Biosynthesis
CYP97	Glyma.11G016200	Biosynthesis of Carotenoids
CYP736	Glyma.09G186300	Phytoalexin (Aucuparin) Biosynthesis in Apple
CYP94	Glyma.03G160300	Jasmonoyl-isoleucine for catabolic turnover
CYP73	Glyma.14G205200	Phenylpropanoid Pathway (C4H)
CYP94	Glyma.03G193500	Jasmonoyl-isoleucine for catabolic turnover
CYP94	Glyma.03G122300	Jasmonoyl-isoleucine for catabolic turnover
CYP51	Glyma.03G115300	Synthesis of antimicrobial triterpenes
CYP90	Glyma.11G067700	Brassinosteroid biosynthetic
CYP714	Glyma.18G218600	Gibberellin Biosynthesis
CYP71	Glyma.13G181900	Phenylpropanoid Pathway (Camaxlin Biosynthesis)
CYP81	Glyma.16G149300	Phenylpropanoid Pathway	Characterized
CYP72	Glyma.13G277100	Confers tolerance to acetolactate synthase-inhibiting herbicides in Arabidopsis and rice
CYP72	Glyma.13G262000	Confers tolerance to acetolactate synthase-inhibiting herbicides in Arabidopsis and rice
CYP98	Glyma.03G122000	Synthesis of suberin phenolic monomers
CYP71	Glyma.10G115300	Phenylpropanoid Pathway (Camaxlin Biosynthesis)
CYP701	Glyma.13G371400	Gibberellin metabolic Pathways
CYP711	Glyma.06G052700	Strigolactone signaling pathway and may be implicated in synthesis of carotenoid-derived branch regulators
Common genes among bioprojects - PRJNA544432, PRJNA574764-common.13
CYP90	Glyma.02G051600	Brassinosteroid biosynthetic
CYP82	Glyma.06G035400	Jasmonic Acid and Ethylene Signaling Pathway
CYP78	Glyma.19G240800	Reported for organ growth	Characterized
CYP77	Glyma.10G202400	In potato tubers take part in the synthesis of cutin and suberin monomers
CYP78	Glyma.02G119600	Reported for organ growth
CYP707	Glyma.07G212700	ABA 8’-hydroxylase
CYP78	Glyma.11G250200	Reported for organ growth
CYP707	Glyma.17G242200	ABA 8’-hydroxylase
CYP71	Glyma.08G326900	Phenylpropanoid Pathway (Camaxlin Biosynthesis)
CYP716	Glyma.08G026900	triterpenoid biosynthesis
CYP77	Glyma.20G188000	In potato tubers take part in the synthesis of cutin and suberin monomers
CYP71	Glyma.17G125300	Phenylpropanoid Pathway (Camaxlin Biosynthesis)
CYP76	Glyma.11G108300	Metabolism of both natural and xenobiotic compounds/Sesquiterpene Biosynthesis santalols and bergamotol
Common genes among bioprojects - PRJNA210431, PRJNA574764-common.5
CYP94	Glyma.01G112400	Jasmonoyl-isoleucine for catabolic turnover
CYP82	Glyma.01G181900	Jasmonic Acid and Ethylene Signaling Pathway
CYP722	Glyma.16G133800	Strigolactone biosynthesis
CYP704	Glyma.03G020400	Anther cutin biosynthesis and pollen exine formation
CYP701	Glyma.15G002200	Gibberellin metabolic Pathways
Common genes among bioprojects - PRJNA324419, PRJNA574764-common.4
CYP96	Glyma.05G003200	Reported for Wax biosynthesis
CYP74	Glyma.12G191400	May play a defensive role against soil-borne pests that affect roots (Allene oxide synthase 3)
CYP71	Glyma.15G050300	Phenylpropanoid Pathway (Camaxlin Biosynthesis)
CYP81	Glyma.08G089400	Phenylpropanoid Pathway
Common genes among bioprojects - PRJNA478334, PRJNA574764-common.4
CYP93	Glyma.03G142000	Flavonoid Metabolism
CYP79	Glyma.11G197300	biosynthesis of the cyanogenic glucoside
CYP75	Glyma.05G021800	Phenylpropanoid Pathway (F3'H, F3',5' H)
CYP715	Glyma.10G234600	Key regulator of flower maturation, synchronizing petal expansion and volatile emission
Common genes among bioprojects - PRJNA210431, PRJNA324419-common.3
CYP83	Glyma.03G030600	Oxime Biosynthesis
CYP89	Glyma.20G018600	Chlorophyll breakdown
CYP93	Glyma.12G067000	Flavonoid Metabolism	Characterized
Common genes among bioprojects - PRJNA210431, PRJNA318321-common.2
CYP90	Glyma.07G010700	Brassinosteroid biosynthetic
CYP94	Glyma.19G090800	Jasmonoyl-isoleucine for catabolic turnover
Common genes among bioprojects - PRJNA318321, PRJNA478334-common.2
CYP90	Glyma.02G057500	Brassinosteroid biosynthetic
CYP89	Glyma.07G220500	Chlorophyll breakdown
Common genes among bioprojects - PRJNA210431, PRJNA544432-common.1
CYP714	Glyma.18G049500	Gibberellin Biosynthesis
Common genes among bioprojects - PRJNA318321, PRJNA324419-common.1
CYP734	Glyma.17G118100	BRs inactivation
Common genes among bioprojects - PRJNA318321, PRJNA544432-common.1
CYP706	Glyma.17G134200	Synthesis of gossypol and related sesquiterpene
Common genes among bioprojects - PRJNA574764, uniq, 41
CYP82	Glyma.19G015300	Jasmonic Acid and Ethylene Signaling Pathway
CYP733	Glyma.02G083200	-
CYP71	Glyma.02G156100	Phenylpropanoid Pathway (Camaxlin Biosynthesis)
CYP71	Glyma.01G179500	Phenylpropanoid Pathway (Camaxlin Biosynthesis)
CYP83	Glyma.03G030400	Oxime Biosynthesis
CYP82	Glyma.19G015200	Jasmonic Acid and Ethylene Signaling Pathway
CYP71	Glyma.07G159800	Phenylpropanoid Pathway (Camaxlin Biosynthesis)
CYP94	Glyma.03G077800	Jasmonoyl-isoleucine for catabolic turnover
CYP82	Glyma.11G060200	Jasmonic Acid and Ethylene Signaling Pathway
CYP89	Glyma.20G018900	Chlorophyll breakdown
CYP71	Glyma.09G142900	Phenylpropanoid Pathway (Camaxlin Biosynthesis)
CYP724	Glyma.16G068100	Brassinosteroid biosynthesis
CYP71	Glyma.07G194300	Phenylpropanoid Pathway (Camaxlin Biosynthesis)
CYP86	Glyma.07G069500	Suberin Biosynthesis
CYP71	Glyma.17G007200	Phenylpropanoid Pathway (Camaxlin Biosynthesis)
CYP82	Glyma.04G035600	Jasmonic Acid and Ethylene Signaling Pathway
CYP734	Glyma.06G215200	BRs inactivation
CYP736	Glyma.09G186500	Phytoalexin (Aucuparin) Biosynthesis in Apple
CYP71	Glyma.08G327100	Phenylpropanoid Pathway (Camaxlin Biosynthesis)
CYP85	Glyma.08G250000	Brassinosteroid biosynthetic
CYP83	Glyma.03G031400	Oxime Biosynthesis
CYP75	Glyma.17G077700	Phenylpropanoid Pathway (F3'H, F3',5' H)
CYP704	Glyma.07G083200	Anther cutin biosynthesis and pollen exine formation
CYP71	Glyma.09G142500	Phenylpropanoid Pathway (Camaxlin Biosynthesis)
CYP71	Glyma.14G117200	Phenylpropanoid Pathway (Camaxlin Biosynthesis)
CYP720	Glyma.16G210300	Resin acid biosynthesis
CYP71	Glyma.16G195500	Phenylpropanoid Pathway (Camaxlin Biosynthesis)
CYP85	Glyma.13G052900	Brassinosteroid biosynthetic
CYP716	Glyma.08G125000	triterpenoid biosynthesis
CYP716	Glyma.05G166900	triterpenoid biosynthesis
CYP86	Glyma.03G008100	Suberin Biosynthesis
CYP736	Glyma.08G140400	Phytoalexin (Aucuparin) Biosynthesis in Apple
CYP71	Glyma.09G142200	Phenylpropanoid Pathway (Camaxlin Biosynthesis)
CYP72	Glyma.15G244250	Confers tolerance to acetolactate synthase-inhibiting herbicides in Arabidopsis and rice
CYP75	Glyma.20G041700	Phenylpropanoid Pathway (F3'H, F3',5' H)
CYP76	Glyma.10G296400	Metabolism of both natural and xenobiotic compounds/Sesquiterpene Biosynthesis santalols and bergamotol
CYP71	Glyma.02G298800	Phenylpropanoid Pathway (Camaxlin Biosynthesis)
CYP712	Glyma.12G239100	-
CYP97	Glyma.13G147500	Biosynthesis of Carotenoids
CYP736	Glyma.05G182800	Phytoalexin (Aucuparin) Biosynthesis in Apple
CYP711	Glyma.04G052100	Strigolactone signaling pathway and may be implicated in synthesis of carotenoid-derived branch regulators	Characterized
Common genes among bioprojects - PRJNA544432, uniq, 5
CYP71	Glyma.08G327200	Phenylpropanoid Pathway (Camaxlin Biosynthesis)
CYP93	Glyma.12G067100	Flavonoid Metabolism
CYP86	Glyma.20G002700	Suberin Biosynthesis
CYP96	Glyma.05G003100	Reported for Wax biosynthesis
CYP96	Glyma.20G004700	Reported for Wax biosynthesis
Common genes among bioprojects - PRJNA318321, uniq, 4
CYP88	Glyma.09G029400	Gibberellin metabolic
CYP97	Glyma.09G252800	Biosynthesis of Carotenoids
CYP72	Glyma.13G261700	Confers tolerance to acetolactate synthase-inhibiting herbicides in Arabidopsis and rice
CYP721	Glyma.09G117400	-
Common genes among bioprojects - PRJNA324419, uniq, 2
CYP82	Glyma.06G035200	Jasmonic Acid and Ethylene Signaling Pathway
CYP83	Glyma.18G100500	Oxime Biosynthesis
Common genes among bioprojects - PRJNA210431, uniq, 1
CYP82	Glyma.16G089900	Jasmonic Acid and Ethylene Signaling Pathway
