# Supplementary material for: Comprehensive Analysis of Cytochrome P450 Monooxygenases Reveals Insight Into Their Role in Partial Resistance Against Phytophthora sojae in Soybean
Source: Front Plant Sci. 2022 Apr 14;13:862314. doi: 10.3389/fpls.2022.862314 (PMC9048032; doi:10.3389/fpls.2022.862314)
Supplement: Supplementary Table 2 — Oligonucleotide sequences used for quantitative real-time PCR (qRT-PCR) analysis of selected soybean GmP450s. [file Table_2.xlsx]

## Sheet: Table S2 -Primers
Table S2. Oligonucleotide sequences used for qRT-PCR analysis of selected soybean GmP450s
P450 family	Gene ID	Primer sequence (5' to 3')	Amplicon size (bp)
CYP71	Glyma.11G062500	GGCAACAACAGTGAAGCACAGC	73
		CGAGGCTCCCACTTTGTTGGATTC
CYP71	Glyma.16G195600	AAGGAGGGCTTGCCCAGGATTAAC	105
		CCCACCACTCCTTTAGGTATTGCC
CYP71	Glyma.11G062600	CCTCGAGGTTCCAATGACGATG	149
		ATTCAGCTTGTGCCTTCTCCTTC
CYP76	Glyma.10G203500	TTGCGGGCACGGATACTACATC	80
		CCTTGACATGATCTCTGGGTTGAG
CYP81	Glyma.09G049200	GCAAAGCGTCAGCTTTACTTTAGG	130
		CATGGCCTCCAACGGAATCAAC
CYP81	Glyma.15G156100	CAAATCATCAAAGGCCTTGCTCTG	61
		TCCCAGTTGATGAGTCAGTTCCAC
CYP93	Glyma.13G173500	TGGGAAAGGACAGACTTGTGGAC	79
		CGGAATGTCTCCTTCACGATTGC
CYP93	Glyma.03G143700	TGGTACCTGAAGCCTTTCGATTTG	78
		CACCACAACGTCAAACCTGTCC
CYP93	Glyma.19G146800	TGACACGTCAGCTGTAAGCATAG	79
		TTGTCTTGCCTTCTCCAACACG
CYP736	Glyma.08G140600	AACTGCCGAGTGACATGTTGCC	63
		GCATAGTGAGGCCGAACTCTTCTG
