# Supplementary material for: Comprehensive Analysis of Cytochrome P450 Monooxygenases Reveals Insight Into Their Role in Partial Resistance Against Phytophthora sojae in Soybean
Source: Front Plant Sci. 2022 Apr 14;13:862314. doi: 10.3389/fpls.2022.862314 (PMC9048032; doi:10.3389/fpls.2022.862314)
Supplement: Supplementary Table 3 — RNA gel picture and qRT-PCR raw data. [file Table_3.xlsx]

## Sheet: Plate info
Plate/Sheet	Genes
Plate 1	Glyma.11G062500
	Glyma.16G195600
	Glyma.11G062600
Plate 2	Glyma.09G049200
	Glyma.15G156100
Plate 3	Glyma.13G173500
	Glyma.19G146800
Plate 4	Glyma.08G140600
	Glyma.10G203500
	Glyma.03G143700
Note: Soybean CON4 was used as a refernece gene
Sample Information
Sr. No	Cultivar	Treatment	Hpi	Replicates	Sample name
1	Mistry	Treated	24	1	M-T-24-1
2				2	M-T-24-2
3				3	M-T-24-3
7		Control	24	1	M-C-24-1
8				2	M-C-24-2
9				3	M-C-24-3
RNA sample (500ng) each run on 1.5% TAE agarose gel

## Sheet: Plate 1
Well	Fluor	Target	Sample	Cq	Cq Mean	Cq Std. Dev	Set Point
C08	SYBR	Glyma.11G062600	M-T-24-3	27.0898	27.0156	0.105	61
C09	SYBR	Glyma.11G062600	M-T-24-3	26.9413	27.0156	0.105	61
B07	SYBR	Glyma.11G062600	M-T-24-2	27.6201	27.6168	0.00476898	61
B08	SYBR	Glyma.11G062600	M-T-24-2	27.6134	27.6168	0.00476898	61
A08	SYBR	Glyma.11G062600	M-T-24-1	27.0067	26.9618	0.0635155	61
A09	SYBR	Glyma.11G062600	M-T-24-1	26.9169	26.9618	0.0635155	61
F07	SYBR	Glyma.11G062600	M-C-24-3	28.4033	28.3542	0.0693745	61
F09	SYBR	Glyma.11G062600	M-C-24-3	28.3052	28.3542	0.0693745	61
E08	SYBR	Glyma.11G062600	M-C-24-2	30.3227	30.4119	0.12616	61
E09	SYBR	Glyma.11G062600	M-C-24-2	30.5011	30.4119	0.12616	61
D07	SYBR	Glyma.11G062600	M-C-24-1	29.938	29.9288	0.0131076	61
D08	SYBR	Glyma.11G062600	M-C-24-1	29.9195	29.9288	0.0131076	61
C04	SYBR	Glyma.16G195600	M-T-24-3	28.6765	28.6577	0.026606	61
C05	SYBR	Glyma.16G195600	M-T-24-3	28.6389	28.6577	0.026606	61
B04	SYBR	Glyma.16G195600	M-T-24-2	29.3862	29.3779	0.0117491	61
B06	SYBR	Glyma.16G195600	M-T-24-2	29.3696	29.3779	0.0117491	61
A04	SYBR	Glyma.16G195600	M-T-24-1	28.4666	28.4797	0.0186201	61
A06	SYBR	Glyma.16G195600	M-T-24-1	28.4929	28.4797	0.0186201	61
F04	SYBR	Glyma.16G195600	M-C-24-3	31.2549	31.2772	0.0314924	61
F06	SYBR	Glyma.16G195600	M-C-24-3	31.2995	31.2772	0.0314924	61
E05	SYBR	Glyma.16G195600	M-C-24-2	33.3596	33.5279	0.237961	61
E06	SYBR	Glyma.16G195600	M-C-24-2	33.6961	33.5279	0.237961	61
D04	SYBR	Glyma.16G195600	M-C-24-1	33.387	33.3162	0.100087	61
D05	SYBR	Glyma.16G195600	M-C-24-1	33.2454	33.3162	0.100087	61
C02	SYBR	Glyma.11G062500	M-T-24-3	29.5873	29.5131	0.104946	61
C03	SYBR	Glyma.11G062500	M-T-24-3	29.4389	29.5131	0.104946	61
B02	SYBR	Glyma.11G062500	M-T-24-2	31.0328	31.0022	0.0433239	61
B03	SYBR	Glyma.11G062500	M-T-24-2	30.9716	31.0022	0.0433239	61
A01	SYBR	Glyma.11G062500	M-T-24-1	29.4215	29.4419	0.0288255	61
A02	SYBR	Glyma.11G062500	M-T-24-1	29.4623	29.4419	0.0288255	61
F01	SYBR	Glyma.11G062500	M-C-24-3	32.5348	32.4994	0.0501321	61
F03	SYBR	Glyma.11G062500	M-C-24-3	32.4639	32.4994	0.0501321	61
E01	SYBR	Glyma.11G062500	M-C-24-2	35.0931	35.3164	0.315733	61
E02	SYBR	Glyma.11G062500	M-C-24-2	35.5396	35.3164	0.315733	61
D01	SYBR	Glyma.11G062500	M-C-24-1	35.1214	35.0817	0.056213	61
D03	SYBR	Glyma.11G062500	M-C-24-1	35.0419	35.0817	0.056213	61
C11	SYBR	CONS	M-T-24-3	30.2304	30.623	0.555203	61
C12	SYBR	CONS	M-T-24-3	31.0156	30.623	0.555203	61
B10	SYBR	CONS	M-T-24-2	29.422	29.3502	0.101641	61
B12	SYBR	CONS	M-T-24-2	29.2783	29.3502	0.101641	61
A10	SYBR	CONS	M-T-24-1	30.4459	30.2696	0.24936	61
A12	SYBR	CONS	M-T-24-1	30.0933	30.2696	0.24936	61
F10	SYBR	CONS	M-C-24-3	28.5133	28.5771	0.270446	61
F11	SYBR	CONS	M-C-24-3	28.8737	28.5771	0.270446	61
F12	SYBR	CONS	M-C-24-3	28.3442	28.5771	0.270446	61
E10	SYBR	CONS	M-C-24-2	28.1963	28.6298	0.460595	61
E11	SYBR	CONS	M-C-24-2	29.1134	28.6298	0.460595	61
E12	SYBR	CONS	M-C-24-2	28.5798	28.6298	0.460595	61
D11	SYBR	CONS	M-C-24-1	29.2013	29.8929	0.978054	61
D12	SYBR	CONS	M-C-24-1	30.5845	29.8929	0.978054	61

## Sheet: Plate 2
Well	Fluor	Target	Sample	Biological Set Name	Cq	Cq Mean	Cq Std. Dev
C07	SYBR	Glyma.15G156100	M-T-24-3		27.9608	27.9608	0
C09	SYBR	Glyma.15G156100	M-T-24-3		27.9536	27.9536	0
B07	SYBR	Glyma.15G156100	M-T-24-2		28.57	28.57	0
B09	SYBR	Glyma.15G156100	M-T-24-2		28.4173	28.4173	0
A08	SYBR	Glyma.15G156100	M-T-24-1		27.1009	27.1009	0
A09	SYBR	Glyma.15G156100	M-T-24-1		27.0157	27.0157	0
F07	SYBR	Glyma.15G156100	M-C-24-3		29.8061	29.8061	0
F08	SYBR	Glyma.15G156100	M-C-24-3		29.4844	29.4844	0
E08	SYBR	Glyma.15G156100	M-C-24-2		31.7568	31.7568	0
E09	SYBR	Glyma.15G156100	M-C-24-2		31.7887	31.7887	0
D07	SYBR	Glyma.15G156100	M-C-24-1		30.8963	30.8963	0
D09	SYBR	Glyma.15G156100	M-C-24-1		31.057	31.057	0
C05	SYBR	Glyma.09G049200	M-T-24-3		34.2029	34.2029	0
C06	SYBR	Glyma.09G049200	M-T-24-3		34.1637	34.1637	0
B05	SYBR	Glyma.09G049200	M-T-24-2		33.8488	33.8488	0
B06	SYBR	Glyma.09G049200	M-T-24-2		33.9241	33.9241	0
A04	SYBR	Glyma.09G049200	M-T-24-1		33.6051	33.6051	0
A05	SYBR	Glyma.09G049200	M-T-24-1		33.7553	33.7553	0
A06	SYBR	Glyma.09G049200	M-T-24-1		33.4652	33.4652	0
F04	SYBR	Glyma.09G049200	M-C-24-3		35.5222	35.5222	0
F05	SYBR	Glyma.09G049200	M-C-24-3		35.3212	35.3212	0
E04	SYBR	Glyma.09G049200	M-C-24-2		37.7231	37.7231	0
E06	SYBR	Glyma.09G049200	M-C-24-2		37.2474	37.2474	0
D04	SYBR	Glyma.09G049200	M-C-24-1		36.4631	36.4631	0
D06	SYBR	Glyma.09G049200	M-C-24-1		36.4865	36.4865	0
C10	SYBR	CONS	M-T-24-3		28.7877	28.8217	0.0482145
C12	SYBR	CONS	M-T-24-3		28.8558	28.8217	0.0482145
B10	SYBR	CONS	M-T-24-2		28.5996	28.701	0.143365
B12	SYBR	CONS	M-T-24-2		28.8024	28.701	0.143365
A11	SYBR	CONS	M-T-24-1		29.2999	29.3805	0.114016
A12	SYBR	CONS	M-T-24-1		29.4611	29.3805	0.114016
F10	SYBR	CONS	M-C-24-3		28.8106	28.8707	0.0851015
F12	SYBR	CONS	M-C-24-3		28.9309	28.8707	0.0851015
E10	SYBR	CONS	M-C-24-2		28.4441	28.5881	0.203685
E11	SYBR	CONS	M-C-24-2		28.7321	28.5881	0.203685
D10	SYBR	CONS	M-C-24-1		28.4468	28.4102	0.0517522
D11	SYBR	CONS	M-C-24-1		28.3736	28.4102	0.0517522

## Sheet: Plate 3
Well	Fluor	Target	Sample	Biological Set Name	Cq	Cq Mean	Cq Std. Dev
C07	SYBR	Glyma.19G146800	M-T-24-3		29.0525	29.0525	0
C08	SYBR	Glyma.19G146800	M-T-24-3		29.2356	29.2356	0
C09	SYBR	Glyma.19G146800	M-T-24-3		29.0835	29.0835	0
B07	SYBR	Glyma.19G146800	M-T-24-2		29.2465	29.2465	0
B08	SYBR	Glyma.19G146800	M-T-24-2		29.1715	29.1715	0
B09	SYBR	Glyma.19G146800	M-T-24-2		29.2657	29.2657	0
A07	SYBR	Glyma.19G146800	M-T-24-1		29.004	29.004	0
A08	SYBR	Glyma.19G146800	M-T-24-1		29.0622	29.0622	0
A09	SYBR	Glyma.19G146800	M-T-24-1		28.9814	28.9814	0
F07	SYBR	Glyma.19G146800	M-C-24-3		29.6286	29.6286	0
F08	SYBR	Glyma.19G146800	M-C-24-3		29.6188	29.6188	0
F09	SYBR	Glyma.19G146800	M-C-24-3		29.6447	29.6447	0
E07	SYBR	Glyma.19G146800	M-C-24-2		30.2911	30.2911	0
E08	SYBR	Glyma.19G146800	M-C-24-2		30.4018	30.4018	0
E09	SYBR	Glyma.19G146800	M-C-24-2		30.3749	30.3749	0
D08	SYBR	Glyma.19G146800	M-C-24-1		29.7821	29.7821	0
D09	SYBR	Glyma.19G146800	M-C-24-1		29.8094	29.8094	0
C04	SYBR	Glyma.13G173500	M-T-24-3		25.9834	25.9834	0
C05	SYBR	Glyma.13G173500	M-T-24-3		25.9366	25.9366	0
C06	SYBR	Glyma.13G173500	M-T-24-3		26.0052	26.0052	0
B04	SYBR	Glyma.13G173500	M-T-24-2		26.1899	26.1899	0
B05	SYBR	Glyma.13G173500	M-T-24-2		26.6022	26.6022	0
B06	SYBR	Glyma.13G173500	M-T-24-2		26.4027	26.4027	0
A04	SYBR	Glyma.13G173500	M-T-24-1		25.7996	25.7996	0
A05	SYBR	Glyma.13G173500	M-T-24-1		25.7076	25.7076	0
A06	SYBR	Glyma.13G173500	M-T-24-1		25.67	25.67	0
F04	SYBR	Glyma.13G173500	M-C-24-3		26.7346	26.7346	0
F05	SYBR	Glyma.13G173500	M-C-24-3		26.7874	26.7874	0
F06	SYBR	Glyma.13G173500	M-C-24-3		26.6592	26.6592	0
E04	SYBR	Glyma.13G173500	M-C-24-2		27.439	27.439	0
E06	SYBR	Glyma.13G173500	M-C-24-2		27.1841	27.1841	0
D04	SYBR	Glyma.13G173500	M-C-24-1		27.2329	27.2329	0
D05	SYBR	Glyma.13G173500	M-C-24-1		27.6091	27.6091	0
D06	SYBR	Glyma.13G173500	M-C-24-1		27.3795	27.3795	0
C10	SYBR	CONS	M-T-24-3		29.3124	29.3131	0.000969706
C11	SYBR	CONS	M-T-24-3		29.3138	29.3131	0.000969706
B10	SYBR	CONS	M-T-24-2		29.3882	29.5548	0.183049
B11	SYBR	CONS	M-T-24-2		29.7508	29.5548	0.183049
B12	SYBR	CONS	M-T-24-2		29.5255	29.5548	0.183049
A10	SYBR	CONS	M-T-24-1		29.7307	29.8345	0.146839
A11	SYBR	CONS	M-T-24-1		29.9384	29.8345	0.146839
F11	SYBR	CONS	M-C-24-3		29.5131	29.5194	0.00879363
F12	SYBR	CONS	M-C-24-3		29.5256	29.5194	0.00879363
E10	SYBR	CONS	M-C-24-2		28.9985	28.9661	0.0458782
E12	SYBR	CONS	M-C-24-2		28.9336	28.9661	0.0458782
D10	SYBR	CONS	M-C-24-1		29.3679	29.4367	0.0972141
D11	SYBR	CONS	M-C-24-1		29.5054	29.4367	0.0972141

## Sheet: Plate 4
Well	Fluor	Target	Sample	Biological Set Name	Cq	Cq Mean	Cq Std. Dev
C04	SYBR	Glyma.03G143700	M-T-24-3		26.5923	26.5923	0
C05	SYBR	Glyma.03G143700	M-T-24-3		26.4994	26.4994	0
C06	SYBR	Glyma.03G143700	M-T-24-3		26.6366	26.6366	0
B04	SYBR	Glyma.03G143700	M-T-24-2		26.6179	26.6179	0
B05	SYBR	Glyma.03G143700	M-T-24-2		26.8322	26.8322	0
B06	SYBR	Glyma.03G143700	M-T-24-2		26.7086	26.7086	0
A04	SYBR	Glyma.03G143700	M-T-24-1		26.8497	26.8497	0
A05	SYBR	Glyma.03G143700	M-T-24-1		26.7895	26.7895	0
A06	SYBR	Glyma.03G143700	M-T-24-1		26.6334	26.6334	0
F04	SYBR	Glyma.03G143700	M-C-24-3		26.8836	26.8836	0
F05	SYBR	Glyma.03G143700	M-C-24-3		27.0173	27.0173	0
F06	SYBR	Glyma.03G143700	M-C-24-3		26.8119	26.8119	0
E04	SYBR	Glyma.03G143700	M-C-24-2		27.9107	27.9107	0
E05	SYBR	Glyma.03G143700	M-C-24-2		27.6116	27.6116	0
E06	SYBR	Glyma.03G143700	M-C-24-2		27.6841	27.6841	0
D05	SYBR	Glyma.03G143700	M-C-24-1		27.2524	27.2524	0
D06	SYBR	Glyma.03G143700	M-C-24-1		27.2846	27.2846	0
C08	SYBR	Glyma.10G203500	M-T-24-3		32.0228	32.0228	0
C09	SYBR	Glyma.10G203500	M-T-24-3		31.9429	31.9429	0
B07	SYBR	Glyma.10G203500	M-T-24-2		31.6165	31.6165	0
B08	SYBR	Glyma.10G203500	M-T-24-2		31.4859	31.4859	0
B09	SYBR	Glyma.10G203500	M-T-24-2		31.5943	31.5943	0
A07	SYBR	Glyma.10G203500	M-T-24-1		31.5487	31.5487	0
A08	SYBR	Glyma.10G203500	M-T-24-1		31.4003	31.4003	0
A09	SYBR	Glyma.10G203500	M-T-24-1		31.2922	31.2922	0
F07	SYBR	Glyma.10G203500	M-C-24-3		32.3121	32.3121	0
F08	SYBR	Glyma.10G203500	M-C-24-3		32.5566	32.5566	0
F09	SYBR	Glyma.10G203500	M-C-24-3		32.4409	32.4409	0
E07	SYBR	Glyma.10G203500	M-C-24-2		31.7229	31.7229	0
E08	SYBR	Glyma.10G203500	M-C-24-2		31.7535	31.7535	0
E09	SYBR	Glyma.10G203500	M-C-24-2		31.8034	31.8034	0
D07	SYBR	Glyma.10G203500	M-C-24-1		32.0756	32.0756	0
D08	SYBR	Glyma.10G203500	M-C-24-1		31.9664	31.9664	0
D09	SYBR	Glyma.10G203500	M-C-24-1		32.136	32.136	0
C01	SYBR	Glyma.08G140600	M-T-24-3		30.5255	30.5255	0
C02	SYBR	Glyma.08G140600	M-T-24-3		30.5836	30.5836	0
C03	SYBR	Glyma.08G140600	M-T-24-3		30.3601	30.3601	0
B01	SYBR	Glyma.08G140600	M-T-24-2		30.818	30.818	0
B02	SYBR	Glyma.08G140600	M-T-24-2		30.6946	30.6946	0
B03	SYBR	Glyma.08G140600	M-T-24-2		30.7484	30.7484	0
A01	SYBR	Glyma.08G140600	M-T-24-1		30.7207	30.7207	0
A02	SYBR	Glyma.08G140600	M-T-24-1		30.8714	30.8714	0
A03	SYBR	Glyma.08G140600	M-T-24-1		30.6732	30.6732	0
F01	SYBR	Glyma.08G140600	M-C-24-3		32.6214	32.6214	0
F03	SYBR	Glyma.08G140600	M-C-24-3		32.6947	32.6947	0
E02	SYBR	Glyma.08G140600	M-C-24-2		34.4774	34.4774	0
E03	SYBR	Glyma.08G140600	M-C-24-2		34.5381	34.5381	0
D01	SYBR	Glyma.08G140600	M-C-24-1		33.1343	33.1343	0
D03	SYBR	Glyma.08G140600	M-C-24-1		33.2118	33.2118	0
C11	SYBR	CONS	M-T-24-3		28.6327	28.8657	0.329629
C12	SYBR	CONS	M-T-24-3		29.0988	28.8657	0.329629
B10	SYBR	CONS	M-T-24-2		28.7041	28.8526	0.135788
B11	SYBR	CONS	M-T-24-2		28.9704	28.8526	0.135788
B12	SYBR	CONS	M-T-24-2		28.8833	28.8526	0.135788
A11	SYBR	CONS	M-T-24-1		29.1749	29.4307	0.361745
A12	SYBR	CONS	M-T-24-1		29.6865	29.4307	0.361745
F10	SYBR	CONS	M-C-24-3		28.93	28.8567	0.13498
F11	SYBR	CONS	M-C-24-3		28.7009	28.8567	0.13498
F12	SYBR	CONS	M-C-24-3		28.9392	28.8567	0.13498
E10	SYBR	CONS	M-C-24-2		28.3067	28.4801	0.159837
E11	SYBR	CONS	M-C-24-2		28.5122	28.4801	0.159837
E12	SYBR	CONS	M-C-24-2		28.6215	28.4801	0.159837
D10	SYBR	CONS	M-C-24-1		28.4029	28.37	0.18186
D11	SYBR	CONS	M-C-24-1		28.5332	28.37	0.18186
D12	SYBR	CONS	M-C-24-1		28.174	28.37	0.18186
