# Supplementary material for: Comprehensive Analysis of Cytochrome P450 Monooxygenases Reveals Insight Into Their Role in Partial Resistance Against Phytophthora sojae in Soybean
Source: Front Plant Sci. 2022 Apr 14;13:862314. doi: 10.3389/fpls.2022.862314 (PMC9048032; doi:10.3389/fpls.2022.862314)
Supplement: Supplementary Table 4 — Identification of GmP450s. Basic local alignment search tool (BLAST) output and characteristics of putative GmP450s. [file Table_4.xlsx]

## Sheet: 359 Query Sequences 
P450 Name	Protein Sequence
AtCYP51G2	MDWDYYTLLKTSVAIIIVFVVAKLITSSKSKKKTSVVPLPPVLQAWPPFIGSLIRFMKGPIVLLREEYPKLGSVFTVKLLHKNITFLIGPEVSSHFFNAYESELSQKEIYKFNVPTFGPGVVFDVDYPVRMEQFRFFSSALKVNXLRGYVDQMTKETEDYFSKWGESGEVDLKAELERLITLTASRCLLGREVRDQLFDDVAPLFHDLDKGMQPISVIFPKLPIPAHNCRDRARGKIAKIFSNIIATRKRSGDKSENDMLQCFIDSKYKDGRETTESEVTGLLIAGLFAGQHTSSITATWTGAYLIQNKHWWSAALDEQKKLIGKHGDKIDYDVLSEMDFLFRSAKEALRLHPPKILLLRTVHSDFTVTTREGKQYEIPKGHIVATSPAFANRLPHVYK…
AtCYP51G1	MELDSENKLLKTGLVIVATLVIAKLIFSFFTSDSKKKRLPPTLKAWPPLVGSLIKFLKGPIIMLREEYPKLGSVFTVNLVHKKITFLIGPEVSAHFFKASESDLSQQEVYQFNVPTFGPGVVFDVDYSVRQEQFRFFTEALRVNKLKGYVDMMVTEAEDYFSKWGESGEVDIKVELERLIILTASRCLLGREVRDQLFDDVSALFHDLDNGMLPISVLFPYLPIPAHRRRDRAREKLSEIFAKIIGSRKRSGKTENDMLQCFIESKYKDGRQTTESEVTGLLIAALFAGQHTSSITSTWTGAYLMRYKEYFSAALDEQKNLIAKHGDKIDHDILSEMDVLYRCIKEALRLHPPLIMLMRASHSDFSVTARDGKTYDIPKGHIVATSPAFANRLPHIFKD…
AtCYP701A3	MAFFSMISILLGFVISSFIFIFFFKKLLSFSRKNMSEVSTLPSVPVVPGFPVIGNLLQLKEKKPHKTFTRWSEIYGPIYSIKMGSSSLIVLNSTETAKEAMVTRFSSISTRKLSNALTVLTCDKSMVATSDYDDFHKLVKRCLLNGLLGANAQKRKRHYRDALIENVSSKLHAHARDHPQEPVNFRAIFEHELFGVALKQAFGKDVESIYVKELGVTLSKDEIFKVLVHDMMEGAIDVDWRDFFPYLKWIPNKSFEARIQQKHKRRLAVMNALIQDRLKQNGSESDDDCYLNFLMSEAKTLTKEQIAILVWETIIETADTTLVTTEWAIYELAKHPSVQDRLCKEIQNVCGGEKFKEEQLSQVPYLNGVFHETLRKYSPAPLVPIRYAHEDTQIGGYHV…
AtCYP702A1	MVEVYELLTVMVSLIVVKLFHWIYQSKNPKPNEKLPPGSMGFPIIGETFEFMKPHDAFQFPTFIKERIIRYGPIFRTSLFGAKVIISTDIELNMEIAKTNHAPGLTKSIAQLFGENNLFFQSKESHKHVRNLTFQLLGSQGLKLSVMQDIDLLTRTHMEEGARRGCLDVKEISSKILIECLAKKVTGDMEPEAAKELALCWRCFPSGWFRFPLNLPGTGVYKMMKARKRMLHLLKETILKKRASGEELGEFFKIIFEGAETMSVDNAIEYIYTLFLLANETTPRILAATIKLISDNPKVMKELHREHEGIVRGKTEKETSITWEEYKSMTFTQMVINESLRITSTAPTVFRIFDHEFQVGSYKIPAGWIFMGYPNNHFNPKTYDDPLVFNPWRWEGKDL…
AtCYP702A2	MVEFHELLTVMVSLFLVKIFHWVYQWRNPKTNGKLPPGSMGFPFIGETFEFFKPHDALQFSTFIKDRVLRHGPVFRTSLFGDKAIISMDMELNLEMAKANSVPGVTKSVIRLFGENNLFLQSKESHKHVRNLTFQLLGPQGLKSRMIEDVDLLARTYMEEGARNGYLDVKETSSKILIGCLAKKVMGEMEPEAAKELALCWRYFQSGWFRFFLNLPGTGVYKMMKARKRMMKLLRKTVLTKRASGEELGEFFNIIFGEMEGEGETMSVENAVEYIYTFFLVANETTPRILAATVKFISDHPKVKQELQREHEEIVRGKAEKEGGLTWEDYKSMHFTQMVINESLRIISTAPTVLRVLEHDFQVGDYTIPAGWTFMGYPHIHFNSEKYEDPYAFNPWRWE…
AtCYP702A3	MSEIYVLALSVVFSLIVVKLCHWVYQWSNPKCKGKLPPGSMGFPIIGETFEFMTPFDISLVVSPYLKKRISRYGSKVFRTSLFGAKVIVSIDPDVNMEIAKASSQLRATESVTRIFGENNPFLQSKEIHKYVRNLTSRFVGPEGLKTRLIHDIDNLLRNDVENGARNGSFDVREATIKMVGELIAKKIMGETESEAVKELGLCWSAFRTSWFQFSYNIPGTTVYRLVKARRKAAKLLKALILKKKASKEGLGDFLDIIFDEMEKDGTALDIDKAVNLIFVFFILSQETTPGVQGAVVKLVADHPSVMEELQREHEAIVQNRADKDTGVTWEEYKSMTFTHMVIKESLRFTSTQPTVHRIPDQDVQIGDYTLPAGWLFFGIPQVHFDEEKYDDPLTFNPW…
AtCYP702A5	MVEVYEFWAVIVSLIVVKLCHWIYQWKNPKGNGKLPPGSMGYPIIGETFEFMKLHDAIQLPTFVKEKLLRHGPVFRTSLFGGKVIISTDIGLNMEIAKTNHIPGMPKSLERLFGATNLFVNKDTHKHARSLTNQFLGSQALKLRMIQDIDFLARTHMKEGARKGCLDVKETASKIVIECLSKKVMGEMEPEAAKELTLCWTFFPRDWFRFAWNFPGTGVYRIVKARNRMMKVIKETVVKKRASGKKLGEFFETIFGDTESVTMSIEIATEYIFTLFVLANETTPGVLAATIKLISDNPKVMQELRREHEGIVQDKIKKDETADLTWEDYKSMTFTQMVINESLRITSTVPTVLRIIDHEIQFGDYTIPAGWIFMGYPYVHFNPEKYDDPLAFNPWRWKG…
AtCYP702A6	MVDLYEFWAVIVSLIVVKLCHSIYQWRNPKSNGELPPGSMGYPIIGETFEFMKPHDAIQLPTFVKEKVLRHGPVFRTSLFGGKVIISTDIGLNMEIAKTNHIPGMPKSLARLFGANNLFVNKDTHKHARSLTNQFLGSQALKLRMLQDIDFLVRTHLKEGARKGSLDIKETTSKIIIECLAKKVMGEMEPDAAKELTLCWTFFPREWFGFAWNIPGTGVYRMVKVARNRMMKVLKETVLKKRASGEELGDFFKTIFGDTERGVKTISLESATEYIFTLFLLANETTPAVLAATIKLISDHPKVMQELQREHEGIVRDKIEKNEKADLTWEDYKSMTFTQMVINESLRITSTVPTVLRIIDHEFQFGEYTIPAGWIFMGYPYVHFNAEKYDDPLAFNPWR…
AtCYP702A8	MVDVYKLWIVIVSLIVVKLFHLIYQWSNPKCNGKLPPGSMGYPIIGETIEFMKPHDALQFSTFIKKRVLIFFFFFLCMFNMDRFFRTSLFGGKVIISMDNELNMEMAKTNRTPGITKSIARLFGEDNNLFLQSTESHKHVRNLTVQMLGSQSLKLRIMENIDLLTRTHMEEGARDGSLDVKETTSKILIECLAKKVMGEMEPEAAKKLALCWRYFPSGWFRLPFNLPGIGVYNMMKARKRMKTLLKEEVLKKREAGEEFGEFSKIIFGEKEGEKETMSMKNVIEYIYTFFVIANETTPRILAATVKFISENPKVMQELQREHAMIFENKSEEAGLTWEDYKSMTFTNMVINESLRISTTVPVILRKPDHDTKVGDYTIPAGWNFMGYPSAHFDPTKYED…
AtCYP703A2	MILVLASLFAVLILNVLLWRWLKASACKAQRLPPGPPRLPILGNLLQLGPLPHRDLASLCDKYGPLVYLRLGNVDAITTNDPDTIREILLRQDDVFSSRPKTLAAVHLAYGCGDVALAPMGPHWKRMRRICMEHLLTTKRLESFTTQRAEEARYLIRDVFKRSETGKPINLKEVLGAFSMNNVTRMLLGKQFFGPGSLVSPKEAQEFLHITHKLFWLLGVIYLGDYLPFWRWVDPSGCEKEMRDVEKRVDEFHTKIIDEHRRAKLEDEDKNGDMDFVDVLLSLPGENGKAHMEDVEIKALIQDMIAAATDTSAVTNEWAMAEAIKQPRVMRKIQEELDNVVGSNRMVDESDLVHLNYLRCVVRETFRMHPAGPFLIPHESVRATTINGYYIPAKTRVFI…
AtCYP704A1	MAIIVVTTIFILLSFALYLTIRIFTGKSRNDKRYTPVHATIFDLFFHSHKLYDYETEIARTKPTFRFLSPGQSEIFTADPRNVEHILKTRFHNYSKGPVGTVNLADLLGHGIFAVDGEKWKQQRKLVSFEFSTRVLRNFSYSVFRTSASKLVGFIAEFALSGKSFDFQDMLMKCTLDSIFKVGFGVELGCLDGFSKEGEEFMKAFDEGNGATSSRVTDPFWKLKCFLNIGSESRLKKSIAIIDKFVYSLITTKRKELSKEQNTSVREDILSKFLLESEKDPENMNDKYLRDIILNVMVAGKDTTAASLSWFLYMLCKNPLVQEKIVQEIRDVTSSHEKTTDVNGFIESVTEEALAQMQYLHAALSETMRLYPPVPEHMRCAENDDVLPDGHRVSKGDNI…
AtCYP704A2	MEILTSIAITVATTIFIVLCFTIYLMIRIFTGKSRNDKRYAPVHATVFDLLFHSDELYDYETEIAREKPTYRFLSPGQSEILTADPRNVEHILKTRFDNYSKGHSSRENMADLLGHGIFAVDGEKWRQQRKLSSFEFSTRVLRDFSCSVFRRNASKLVGFVSEFALSGKAFDAQDLLMRCTLDSIFKVGFGVELKCLDGFSKEGQEFMEAFDEGNVATSSRFIDPLWKLKWFFNIGSQSKLKKSIATIDKFVYSLITTKRKELAKEQNTVVREDILSRFLVESEKDPENMNDKYLRDIILNFMIAGKDTTAALLSWFLYMLCKNPLVQEKIVQEIRDVTFSHEKTTDVNGFVESINEEALDEMHYLHAALSETLRLYPPVPVDMRCAENDDVLPDGHRV…
AtCYP704B1	MSLCLVIACMVTSWIFLHRWGQRNKSGPKTWPLVGAAIEQLTNFDRMHDWLVEYLYNSRTVVVPMPFTTYTYIADPINVEYVLKTNFSNYPKGETYHSYMEVLLGDGIFNSDGELWRKQRKTASFEFASKNLRDFSTVVFKEYSLKLFTILSQASFKEQQVDMQELLMRMTLDSICKVGFGVEIGTLAPELPENHFAKAFDTANIIVTLRFIDPLWKMKKFLNIGSEALLGKSIKVVNDFTYSVIRRRKAELLEAQVKHDILSRFIEISDDPDSKETEKSLRDIVLNFVIAGRDTTATTLTWAIYMIMMNENVAEKLYSELQELEKESAEATNTSLHQYDTEDFNSFNEKVTEFAGLLNYDSLGKLHYLHAVITETLRLYPAVPQDPKGVLEDDMLPNG…
AtCYP705A1	MDAIVVDSQNCFIIILLCSFSLISYFVFFKKPKVNFDLLPSPPSLPIIGHLHLLLSTLIHKSLQKLSSKYGPLLHLRIFNIPFILVSSDSLAYEIFRDHDVNVSSRGVGAIDESLAYGSSGFIQAPYGDYWKFMKKLIATKLLGPQPLVRSQDFRSEELERFYKRLFDKAMKKESVMIHKEASRFVNNSLYKMCTGRSFSVENNEVERIMELTADLGALSQKFFVSKMFRKLLEKLGISLFKTEIMVVSRRFSELVERILIEYEEKMDGHQGTQFMDALLAAYRDENTEYKITRSHIKSLLTVEFFIGAADASSIAIQWAMADIINNREILEKLREEIDSVVGKTRLVQETDLPNLPYLQAVVKEGLRLHPPTPLVVREFQEGCEIGGFFVPKNTTLIV…
AtCYP705A12	MAELIIVDFQNISIFILLCLFSFLCYALFFKKPKGFDLPPSPPSLPIIGHLHHLLSSSLPHKSFQKLSFKYGPLLHLRIFNFPMVLVSSASMAYEVFRTNDVNVSYRFVPVNKDSLVFGSSGFVTAPYGDYWKFMKKLISTKLLRPHALELSKGNRAEELRRFCLDLQGKARKKESVEIGKVALKLTNNIICRMSMGRSCSEKNGVAERARELVNKSFALSVKLFFSNMFRKDIMGVSREFDEFLERILVEHEENLEGDQDRDMIDHLLEAYRNEEAEYKITRKQIKSLIVEIFLGGTDSSAQTIQWTMAEILNNPGVLEKLRAEIDSVVGGKRLIQESDLPNLPYLQAVVKEGLRLHPSAPVLLRVFGESCEVKEFYVPEKTTLVVNLYAVNRDPDSW…
AtCYP705A13	MATIVVDFQKIHFHPQILLSIFTVICIFVFFFKKPKGSRGCDLPPSPPSLPIIGHLHLLLFDLPHKAFQKLSSKYGPLLCLRIFNVPIVLVSSASVAYEIFKTHDVNISSHGHPPIDECLFFGSSSFVMAPYGDYWKFMKKLMVTKLFGPQALEQSRGARADELERFHANLLSKEMKSETVEIAKEAIKLTNNSICKMIMGRGCLEENGEAERVRGLVTETFALFKKLFLTQVLRRLFEILRISPFKKETLDVSRKFDELLERIIVEHEEKTDYDHGMDLMDVLLAVYRDGKAEYKITRDHLKSLFVELILGGTDTSAQTIEWTMAKIIKKPNILERLRKEIDSVVGKTRLIQEKDLPNLPYLQAVIKEGLRLHPPAPLLGRKVTDGCTIGGCYVPKNT…
AtCYP705A15	MAAMNIVDFQNCFFFVLLSLFSLLCYSLFFRKPKEPRLHYDLPPSPPTLPIIGHLHLLLSVLVHRSLQTLSTKYGSILYLRVFSFPVALVSSASIAYEIFREHDVNISSRGFPPTDDSLFAGSFSFTSAPYGDYWKFMKKLLVTNLLGPQALERSRGFRADELDLFYENLLDKAMKKESVDICVEALKLSNNSICKMIMGRSCSEENGEAERVRALATQLDGLTKKILLANMLRAGFKKLVVSLFRKEMMDVSSRFDELLERILVEHEDKLDMHHQGTDLVDALLAACRDKNAEYKISRNHIKSFFADLLFASTDTFVQTTQWTVAEIINNPNVLERLRGEIDSVVGKARLIQETDLPNLPYLQAVVKEGLRLHPPGPLFARFSQEGCRIGGFYVPEKT…
AtCYP705A16	MAAMINVEFQNCFIFMLLCLFSLLCYSLLFRKPSSRQNSYDCDLPPSPPSMPIIGHLHLILSSLVHKSFQKISSKYGPLLHLRIFNVPIVLVSSASVAYDIFRVHDVNVSSRGPPPFEESLLFGSSSFISAPYGDYWKFMKKLMVTKLLGPHALERSRKIRADELYRLYTNLLDKAMKKESVEIGKETMKLTNNTICKMIMGRSCSEENGEAKIVRGLIAESFTLSKKFFLAATLRRLLEKLGISLFQKEIMGVSRGFDELLERILREHEEKPDEHHDTDMMDALLAAYNDEKAEYKITRNQIKAFIVDMFIAGTDISALTTQGTMAEIINNPNVLVRIREKIDSVVGKSRLIQETDLPKLPYSQAVVKEGLRLHPPTPLMVREFQEGCKVKGFYIPAS…
AtCYP705A18	MATLISVDFQHCFMYIILLCLFSLLCYSLFFRKPKGTRVGCDLPPSPPSLPIIGHLHHLLSSLTHKSLQKLSSKYGPFLHLRIFSVPIILVSSASVAYEIFKAHDVNVSSRGAAAIDESLLFGSSSFIYAPYGDYWKFMKKIFATKLLRPQVLENSRGVRAEELKRFYRRILDKARKNENIEISKESAMLMNNILCRMSMGRSFSEENGEAERVRGLVGESYALVKKIFFAATLRRLLEKLRIPLFRKEIMGVSDRFDELLERIIVEHKDKLEKEHQVMDMMDVLLAAYRDKNAEYKITRNHIKSFFVDLFVGGTDTSVQTTQWTMAEIINNPNILQTLRKEIDSVVGKSRLIHETDIPNLPYLQAVVKEGLRLHPPGPLLIRTFQERCEMKGFYIPEK…
AtCYP705A19	MTTTEFQSCFIFLLLCLFSLVCYSLFFRKPSSRRDAHGCDLPPSPPSLPVIGHLHLILSSLVHKSFQKISSNYGPLLHLRIFNVPIVLVSSASVAYDIFRVHDLNVSSRGSPPFEESLLFGSTGFISAPYGDYFKFMKKHLVTKLLGPQALERSRLIRTNELERFYINLLDKATKKESVEIGKEAMKLSNNSICKMIMGRSCLEEKGEAERVRGLIIESFYLTKKFFLAFTLRGLLEKLGISLFKKEIMGVSRRFDDLLERYLREHEEKPDNEHQDTDMIDALLAAYRDEKAEYKITRNQIKAFLVDIFIAGTDISALTTQGTMAEIINNPNIFVRIREEIDSVVGKSRLIQETDLPKLPYLQAVVKEGLRLHPPTPLMVREFQEGCKVKGFYIPASTT…
AtCYP705A2	MAVLIIFILLCLLSFLCYSLFFMKPKDSRDGRDLPPSPPSLPIIGHLHLILLSTLTHKSFQRLSSKYGPLLHLRIFHVPIVLASSASVAYEIFRDQDVNVSFRHSPPIEESLFLGSYSFISAPYGDYWKFMRKLMVTKILGPQALERSRRFREDELDRFYKTLLDKAMKKESVEIVEEAAKLNNNTICKMIMGRSCSEETGEAERIRGLVTESMALTKKIFLATIFHKPLKKLGISLFKKEIMSVSRKFDELLEKILVEHEEKMEEHHQGTDMMDVLLEAYRDENAEYKITRNHIKSMFVDLFIAGTDTSSTTIQWIMAEIINHPKILERLREEIDFVVGKTRLIQETDLPNLLYLQAIIKEGLRLHPPGPLLPRTVQERCEIKGFHIPEKTILVVNSY…
AtCYP705A20	MLTVDSQHCFSFILLCFFSLLCYSLLFKKLKDSHVGRDLLQSPPSLPIIGHLHHLLSSLAHKSLQQLSSKYGPLLHLSIFNFPVVLVSSASVAYEIFKAHDLNISSRDNPPINESLLVGSSVFVGAPYGDYWKFMKKLLVTKLLGPQALERSRSIRADELERFYRSLLDKAMKKESVEIGKEATKLSINSICRMSMGRSFSEESGEAERVRGLVTELDGLTKKVLLVNILRWPLEKLRISLFKKEIMYVSNSFDELLERIIVEREKKPNEHQGTYLMDVLLEAYEDEKAEHKITRNHIKSLFVELLLGGTDTSAQTIQWTMAELINNRNVLKRLREEIDSVVGETRLIQEKDLPKLPYLQSVVKEGLRLHPPLPLMVRTFQRSCEMKGFYIAEKTTLVV…
AtCYP705A21	MAAIIGDCFIFILLCLFSLLFYYLIFRKPKNSRLVAYGCDLPPSPPSLPIIGHVHLLLSSLAHKSLQKLSSKYGPLLYLRVFNFPVVLVSSASVAYEIFKAHDLNISSRDNPSIDDSLLIGSSVFGSAPYGDYFKFMKKLLVTKLLGPQALERSRGIRADELERFHSSLLDKAVKKEIVEIGKEATKLSNNSLWRMSIGRSFSEKNGEAERVRGLVTELDGLTKKVLFATLLHRPLEKLGISLFKKEIMCVSDSFDEVLERVLVEHEQKLDDHQDRDMMDVLLAAYGDENAEHKISRNHIKAFFVELFFAGTDTSAQSIQWTMAEIINNPNILKRLREEIDSVVGKTRLIQETDLPKLPYLQAVVKEGLRLHPPLPLFVRTFQEGCKIGGFYVPEKTTL…
AtCYP705A22	MEAVISFDFQNCFIFILIFLLTFLCFFFFFKKPKDSRVNFDLPPSPPSLPIIGHVHLLLSTLTHKSLQKLSSRYGPLLYLRIFNVPIILVSSASVAYEIFRTQDVNISSRGVTAVDESLVFGSSSFVTAPYGDYWKFMKKLTVMKLLGPQAQEQSRDIRADDIKRFCRNLLDKARKKESVEIGKEAMNLMNNILCKMSMGRSFSEENGETEKLRGLVTESIGLMKKMFLAVLLRRQLQKLGISLFKKDIMGVSNKFDVLLEKVLVEHREKPEKDQGTVMLDVLLAAYGDENAEYKITKNHIKAFFVDLFIGATDTSVQTIQWTMAEIMNNTHILERMREEIDSVVGKSRLIQETDLPNLPYLHAVIKEALRLHPPGPLLPREFQQGCKIGGFYIPEKTT…
AtCYP705A23	MAAMLTVEFQNCLIFILLCILLLLCYPLFFKKPKVSQDGFGLPPSPLSLPIIGHLHLLFSNLTHKSLQKLSSKYGPLLYLRIFNVPIIFVSSASVAYEIFRGHDVNISFRGNPPIEESLLVGSFGFFTAPYGDYWKFMKKVMVTKLLGPQALQRSRGIRADALERFYMNLLDKAMKKESVEIGKETMKLIYDSICKMIMGRNFSEENGEAERVRGLVTESTALTKKIFMANVLHKPLKKLGISLFKKEIMDVSNSFDELLERFLVEHEEKLNEDQDMDMMGVLLAACRDKNAECKITRNHIKSLFVDLVVAGTDTSRHATQWTMAEIINKPKVLEKVREEIYSVVGRTRLVQETDLPSLPYLQATVKEGLRLHPPGPLFARTAREGFSVGGFYVPENTP…
AtCYP705A24	MTVMVSFDLLNCFIFTLIFLISTLFLFVLFYKKPNDGFDVPPSPPSLPIIGHLHLLLFASIHKCFQKISSKYGPFLHLRIFHVPIVLVSSASTAYDIFKTNDINVSYRGDVAIDECIVFGSFGYFRAPCEDYWKFMRKLIMARALGPQALERTRGVRAAELERFHRKLLDKAMKKQSLKIGEEARILVNNTLGKMSLGSSFSIENNDGTKVSEYSIKLADLSQMFCVAQIFHKPLEKLGISLLKKQIMDVSHKFEELLENIVVKYEEKMDNHQSTEFMDALLAAYQDENAEYKITRNHIKALLAELFFGAGESSSSTTRWAMGEIFNNPRIFEKLRTEIDSVVGTTRLIQESDLPKLPYLQAVVKESLRLHPVGAVLPREFTQDCNIGGFYIHEGTSLV…
AtCYP705A25	MAAISVDFQLCFIFILLAIFSLFCFSAFFFKKPKDPQLQGCGLPPSPPSLPIIGHLHFLLSVPCYKSFQKLSSKYGPFLHLRAFNIPIVLVSSGSMANEVLRIQDLNFASRDSGQTPIMEKSLLFGSFGFVSVPYGDYWRFMKKLLVKKLLGSHSLEQTRLLRGKELQTFRAMLFDKAAKNETVDVGKEMMKLTNNSICRMTMGRSCSEENGEAEQVRGLVTKSLSLTKKFLIASIVGQFSKLVGISLFGKEIMEVSQRYDELLEKIIKEHEENPNNGEDRDMMDVLLEVCADDNAEFKISRNQIKALFVEIFLAGTDTSAQTIQWILAELINHPEILEKLRKEIESVVGVRRLIQETDLPNLPYLQAVMKEGLRLHPHTPILVRNATEGCKIGGYYIG…
AtCYP705A27	MAAITVDFQLCFIFILLGIFSLFCLSAFFFKKPKDPQLQGCGLPPSPPSLPVIGHLHLLLSVPCHKSFQKLSSKYGPLLHLRAFNIPIVIVSSGSMANEVLRTQDLNFATRQREVSIMEKSLLFGSFGFVSAPYGDYWRFMKKLLVTNLFGSHSLEQTRLIREKELKTFRTMLFDKAAKKGTVDVGKEMMKLTNNSICRMIMGRRCSEENSEAEKVEDLVIKSFSLVKKVLIANTVGRLLKKFGISLFEKEIMEVSQRYDELLEKIIKEHEEDPNKKEDRDMMDVLLEVCADDKAEVKITRNQIKALIVELFLGGTDTSAQTIQWIMAELINHPEILKILREEIESVVGTTRFIQETDLSNLPYLQAVMKEGQRLHPHSPMLVRNATKGCKIGGYYIPQ…
AtCYP705A28	MAAMITVDFQNSFAFILFCLFSLLCYSLFFRKAKGSRAGRDLPPSPPSFPVIGHLHLLLSVLVHKSFQKISSKYGPLLLLRIFHVPIVLTSSASVAYEIFRAQDVNVSSRGHPPVEESLWFGFSSFFFAPYGDYFKFMRKLIATKLLGPQALDRSRKIRADELDRFYRNLLDKAMKKESVEIGEEAAKLNNNIICKMIMGRSCSEKNGEAERVRGLVIESLALSPKIFLGMIFHKPLKKLGISLFQKDIKSVSPKFDELLEKFLVEHEEKMEEDHYKANDMMDLLLEAYGDENAEYKITRNHIKSLFVELLVAGTDTSALATQWTMAELINNPTILERLREEIESVVGNTRLIQETDLSNLPYLQSVVKEGLRLHPPASISVRMSQERCELGGFYIPEK…
AtCYP705A3	MIAIIVEFQNFFIFILLCLFSLLCHSLFFKKPKDSRSFVLPSSPPSLPIIGHLHLLLSVLTHKSLQKLSSKYGPLLLIRIFYVPIILVSSSSMAYEIFKAHDVNVSSRGIIALDESLMFGASGILNAPYGDYWKFMKKLMATKLLRPQVLERSRGVRVEELHRFYRSILDKATKNESVEIGKEAMKLMNNTLCKLIMGRSFSEDNGESNRVRGLVDETYALSEKIFLAAILRRPLAKLRISLFKKEIMGVSNKFDELLERILQERKENLEEKNNEGMDMMDVLLEAYGDENAEYKITWKHIKAFFVEFFIGGTDTSVQTTQWAMAEMINNANVLERLREEIVSVVGETRLIQETDLPNLPYLQAVVKEVLRLHPPSPVLIRKFQEKCEVKGFYIPEKTT…
AtCYP705A30	MAAMITFDFQNSFIFILFFLFSLLCYSLFFRKPKGSRAGRDLPPSPPSFPVIGHLHLLLSALVHKSFQNISSKYGPLLHLRVFHIPIVLASSASVAYEIFKAQDVNVSSRGHAPVGESLWFGSSSFFFAPYGDYFKFMRKLIATKLLGPQALERSRKIRADELDRFYKTLLDKAMKKESVEIGEEAAKLNNNIICKMIMGRSCSEENGEAEKFRHLVIESMALTKQIFFGMIFHKPLKKLGISLFQKDILSLSRKFDELLEKILFEHEEKKAEHNQANDMMDFLLEAYGDENAEYKITRNHIKSLFVDLVIAGTDTSVQATQWTMGELINNPKILQRLREEIESVVGNTRLIQENDLPNLPYLQAVVKEGLRLHPPGSISVRMFQERCELKGFYIPEKT…
AtCYP705A32	MAAMITVDFQNSFIFILFCLFSLICYSLFFRKPKDSRAGRDLPPSPPSFPVGSPQSNNLHLLLSALVHKSFQKISYKYGPLLHLRVFHVPIVLASSASVAYEIFKAQDVNVSSRGHAPAGESLLFGSSSFFFAPYGDYFKFMRKLIATKLLGPQALERSRKIRADELDRFYRNLLDKAMKKESVDIVEEAAKLNNNIICKMIMGRSCSEDNGEAERVRGLVIESTALTKQIFLGMIFDKPLKKLGISLFQKDIKSVSRFDELLEKILVEHEERMGKHYKANDMMDLLLEAYGDENAEYKITRNHIKSLFVDLVIAGTDTSAQTIEWTMAELINNPNILERLREEIESVVGNTRLVQETDLPNLPYLQAVVKEGLRLHPPGAVFLRTFQERCELKGFYIP…
AtCYP705A33	MAAFISVDFQNCFIFILLCFFSLLCYSLFFKKPKDSRGCDLPPSPPSLPIIGHLHLLLSSLSHKSLQKISSKYGPLLHLRIFNVPIILVSSASVADEVFRIHDMNISSRGAAAIDESLVFGSSGVVYAPYGDYLKFVKKIIATKLLRPQVLERSRGLRAEELQRLYNRILDKAKMNENVEIGKEATMLMNNIFCRMSMGRSFSEENGEAERVRGLVAESYALAKKIFFASVLRRLLKKLRIPLFKKDIMDVSNRFNELLEKILVEHNEKLDEEHKDTDMMDVLLAAYADENAEYKITRNHIKSFFVELFVGGTDTSVQTTQWTMAEIINNSDVLERLREEIDSVVGTSRMIQETDIPNLPYLQAVVKEGLRLHPPFPLLTRKFEERCEIKGFYIPEKTF…
AtCYP705A34P	MLAKIVVDFQNCLIFILISLFSLLCLFVFVFKKPKDSRGCDLPPSPPSLPIIGHLHLILSTLPHKSFQNISSKYGPLLLLRFFNVPVVLKSSANVAYEIFKTHDVNISSHGHPPIDECLFFGSSSFVVAPYGYYWRLMKKLMVTKLFGPQALERLRHVREDELERFHTNLLSKEMKGETVQIAKEAIKLTNNSVCKMIMGRSCLEENGDAARVRGLVTETFALVKKIFLTQVLRRLFEILGISLFKKEILGVSRKFDEFLEKILVEHDEKPDFQGGDMMDVLLAAYRDENAEYKITRNHIKSLFAELILGGTDTSAQTIEWTMAEIINKPNILEKLRKELDSVVGKTRLIEEKDLPNLPYLQSVVKEGLRLHPPAPVFGRKVLEGCTIKGYYVPKNTAL…
AtCYP705A4	MIDFQNCFIFILLCLFSRLCYSHFFKKPKDPRLHFDLPPSPPSLPIIGHLHLLLSVLLHRSLQKLSTKYGSILYLRVFRFPVVLISSASIAYEIFRAHDLNISYRGFTPTDDSLFAGSFSFISAPYGDYWKFMKKVLVTNVFGPQAHEQSRGVRADVLERFYGNLFDKAIKKQSVEICAEALKLSNSSICKMIMGRSCSEERFRALATELDVLTKKLFFANMLRAWFKKLVVSLFKKETTVISYRFDELLESILVEHEKKLDVHHQRTDLMDALLAAYRDENAEYKITRNHIKSIIADLLFAGTENQVQTIQWAMAEIINNPNVLERLRGEIDSVVGKSRLIQETDLPKLPYLQAVVKETIRLHPPGPFFLRFTKEGCRIRGFYVPENTSVVVNVYAVM…
AtCYP705A5	MITVDFENCFIFLLLCLFSRLSYDLFFRKTKDSRAGCALPPSPPSLPIIGHLHLILFVPIHQSFKNISSKYGPLLHLRFFNFPIVLVSSASTAYEIFKAQDVNVSSRPPPPIEESLILGSSSFINTPYGDYSKFMKKFMVQKLLGPQALQRSRNIRADELERFYKTLLDKAMKKQTVEIRNEAMKLTNNTICKMIMGRSCSEENGEAETVRGLVTESIFLTKKHFLGAMFHKPLKKLGISLFAKELMNVSNRFDELLEKILVEHEEKLQEHHQTSDMLDMLLEAYGDENAEYKITRDQIKSLFVDLFSAGTEASANTIQWTMAEIIKNPKICERLREEIDSVVGKTRLVQETDLPNLPYLQAIVKEGLRLHPPGPVVRTFKETCEIKGFYIPEKTRLFV…
AtCYP705A6	MAAILSVDFQNCFIFIVLCLFSLFCYSLFFKKPKHPRGCDLPPSPPSLPIIGHLHLLFSPLTHKSLQKLSSKYGHLLHLRIFNVPVILVSSASVAYEIFRAHDVNVSSRGVAAIDESLLFGSSGIITAPYGDYWKFMKKLIATKLLRPQSLESSRGIRGEELTRFYNSLLDKARMTESVEISTEAMKLVNNTLCRMSMGRSFSEENGEAEKIRGLVGESYALTKKMFLASLLRKPLKKLRISLFEKEIMGVSDRLDELLERILVEHEEKLHEEHQGTDMMDVLLAASGDENAEYNITRNHIKSFFVEIFIGATDTSVQTTQWTMAEILNHPNVLERLRKDIDSVVGKTRLIHETDLPNLPYLQAVVKEGLRLHPPGPLLVRTFQERCKIKGFYIPEKTT…
AtCYP705A8	MGEIMNVDFVNCLILILLCLLSILCYSFFFKKPKDGFNLPPSPPSLPIIGHLHHLLSLFMHRSLQKLSSKYGPLLYLHVFNVPILLVSSPSIAYEIFRAQDVNVSTRDFPTNEGSLFLGSFSFITAPYGEYWKFMKKLIVTKLLGPQALERSQRIRANEVERFYSNLLDKAMKKESVEIADEAMKLVNNIICKMIMGRTCSEENGEAERIRGLVTKSDALLKKFLLAAILRKPLKKIGITLFKKVFMDISLKFDEVLEKILVENEERLEENQQGTDIMDKLLEVYGDKTSEYKITRDHIKSLFVDLFFAGTDTATHTIEWTMAEIMNNSLILERLREEIDSVVGKTRLIQETDLPNLLYLQATVKEGLRLHPTIPLVLRTFQDGCTIGGFSIPKKTKLV…
AtCYP705A9	MNVDFQNCLILILLCLLSFLCYSFFFKKPKDGFNLPPSPPSLPIIGHLHHLLSLFMHRSLQKLSSKYGPLLYLHVFNVPILLVSSPSIAYEIFRTQDVNVSSRDFPTNEGSLLFGSFGFGTAPSSGLKHSRGHKKSVQRSYYLNLLDKAVKKESVEIAEEAMKLVNNTVCQMIMGRSCSEENGEAERVRGLVTKTDALTKKFILAGILRKPLQKIGISLFKKELMDASCKFNEVLEKILVEYKEKVEEHHQGTDMMDKLLEVYGDEKAEYKITRDHIKSLFVDLFFAGTDTWTHAIQWIMAEIINNSYILERLREEIDSVVGKTRLIQETDLPNLPCLQATVKEGLRLHPPVPLVLRTFKEGCTIGGFYVPEKTTLVVNGYAMMRDPEYWEDPQEFKPE…
AtCYP706A1	METASSNFSLSQILNIEEPYSSVMLGVAALLAVVCYFWIQGKSKSKNGPPLPPGPWPLPIVGNLPFLNSDVLHTQFQALTLKHGPLMKIHLGSKLAIVVSSPDMAREVLKTHDITFANHDLPEVGKINTYGGEDILWSPYGTHWRRLRKLCVMKMFTTPTLEASYSTRREETRQTIVHMSEMAREGSPVNLGEQIFLSIFNVVTRMMWGATVEGDERTSLGNELKTLISDISDIEGIQNYSDFFPLFSRFDFQGLVKQMKGHVKKLDLLFDRVMESHVKMVGKKSEEEEDFLQYLLRVKDDDEKAPLSMTHVKSLLMDMVLGGVDTSVNASEFAMAEIVSRPEVLNKIRLELDQVVGKDNIVEESHLPKLPYLQAVMKETLRLHPTLPLLVPHRNSETS…
AtCYP706A2	MGTASSKSNINLSQVLNTEEPYSSVMLAVAALLAVVCYLWIQGKSKSKKEPPLPPGPWPLPIVGNLPFLNSDVLHTQFQALTLKYGPLMKIHLGSKLAIVVSSPDMAREVLKTHDITFANHDLPEVGKINTYGGEDILWSPYGTHWRRLRKLCVMKMFTTPSLEASYSTRREETRQTIVHMSEMAREGSPVNLGEQIFLSIFNVVTRMMWGATVEGDERTSLGNELKTLISDISDIEGIQNYSDFFPLFSRFDFQGLVKQMKGHVKKLDLLFDRVMESHVKMVGKKSEEEEDFLQYLLRVKDDDEKAPLSMTHVKSLLMDMVLGGVDTSVNASEFAMAEIVSRPEVLNKIRLELDQVVGKDNIVEESHLPKLPYLQAVMKETLRLHPTLPLLVPHRNSE…
AtCYP706A3	MTDISSLFRNRSRKDQLDYGLTVIVISTLCWCLWLYAKCKRRSPPLPPGPWGLPIIGNLPFLQPELHTYFQGLAKKHGPIFKLWLGAKLTIVVTSSEVAQEILKTNDIIFANHDVPAVGPVNTYGGTEIIWSPYGPKWRMLRKLCVNRILRNAMLDSSTDLRRRETRQTVRYLADQARVGSPVNLGEQIFLMMLNVVTQMLWGTTVKEEEREVVGAEFLEVIREMNDLLLVPNISDFFPVLSRFDLQGLAKRMRRPAQRMDQMFDRIINQRLGMDRDSSDGRAVDFLDVLLKVKDEEAEKTKLTMNDVKAVLMDMVLGGTDTSLHVIEFAMAELLHNPDIMKRAQQEVDKVVGKEKVVEESHISKLPYILAIMKETLRLHTVAPLLVPRRPSQTTVVGG…
AtCYP706A4	MSPISNLFPDNTINLTPYAIVILTTVFSILWYIFKRSPQPSLPPGPRGLPIVGNLPFLDPDLHTYFANLAQSHGPIFKLNLGSKLTIVVNSPSLAREILKDQDINFSNRDVPLTGRAATYGGIDIVWTPYGAEWRQLRKICVLKLLSRKTLDSFYELRRKEVRERTRYLYEQGRKQSPVKVGDQLFLTMMNLTMNMLWGGSVKAEEMESVGTEFKGVISEITRLLSEPNVSDFFPWLARFDLQGLVKRMGVCARELDAVLDRAIEQMKPLRGRDDDEVKDFLQYLMKLKDQEGDSEVPITINHVKALLTDMVVGGTDTSTNTIEFAMAELMSNPELIKRAQEELDEVVGKDNIVEESHITRLPYILAIMKETLRLHPTLPLLVPHRPAENTVVGGYTIP…
AtCYP706A5	MSMLSNLFPDNAISLTPYAYAVLILTATFSILWYIFKRSPQPPLPPGPRGLPIVGNLPFLDPDLHTYFTKLAQSHGPIFKLNLGSKLTVVVNSPSLASEILKDQDINFSNHDVPLTARAVTYGGLDLVWLPYGAEWRMLRKVCAAKLFSRKTLDSFYELRRKEIRERTRCLYQKGLEKSPVNVGEQLFLTMMNLMMNMLWGGSVKAEDMESVGTEFKGVISEITRLLGVPNVSDFFPMLARFDLQGLVKKMHLYARDLDAILDRAIEQMQRLRSRDGDDGECKDFLQHLMKLRDQEADSDVPITMNHVKAVLMDMVVGGTESSTNTIEFVMAELISNPELMRRAQQELDEVVGKDNIVEESHITSLPYILAVLKETLRLYPTIPLLVPHRPSETALVGG…
AtCYP706A6	MSPISNLFAGNTINLTPYAILILIAIFSILWYLFKRSPQPHLPPGPRGLPIVGNLPFLDPDLHTYFTKLAESYGPIFKLNLGSKLTVVVNTPSLAREILKDQDINFSNHDVPLTARAVTYGGLDLVWLPYGAEWRMLRKVCVLKLLSHRTLNSFYELRRKEIRERTRYLYQKGQEESPVNVGEQVFLTMMNLTMNMLWGGSVKAEEMESVGTEFKEVISEITRLLGEPNVSDFFPRLARFDLQGLVKKMHVCARELDAILDRAIEQMQLLRTRDGDDGECKDFLQHLMKLKDQEADSEVPITVNHVKAVLVDLVVGGTDTSTNTIEFAMAELIRKPELMKRAQQELDEVVGKDNIIEESHITRLPFISAIMKETLRLYPTIPLLVPHRPSETALVGGYT…
AtCYP706A7	MTDIFTFFTIQNRNDHFDFVLATIVISSVFWYIWVYVKSKRLFPPLPPGPRGLPIVGNLPFLHPELHTYFHSLAQKHGPVFKLWLGAKLTIVITSSEATRDILRTNDVIFANDDVPVAGSLSTYGGVDIVWSPYGPEWPMLRKICINKMLSNATLDSNSFSALRRQETRRTVRYLADRARAGLAVNVGEQIFVTILNVVTQMLWGETVADDEEREKVGAEFLELITEIIDVVGKPNVSDFFPVLSRFDLQGLAKRVRRSAQRMDRMFDRIISQRMGMDKGSKGNGGDFLMVLLNAKDEDENMSMNHVKALLMDMVLGGTDTSLNTIEFAMAELINKLEIMKRAQQELDKVVGKNNIVEEKHITKLPYILSIMKETLRLHPALPLLIPRCPSETTVIGGY…
AtCYP707A1	MDISALFLTLFAGSLFLYFLRCLISQRRFGSSKLPLPPGTMGWPYVGETFQLYSQDPNVFFQSKQKRYGSVFKTHVLGCPCVMISSPEAAKFVLVTKSHLFKPTFPASKERMLGKQAIFFHQGDYHAKLRKLVLRAFMPESIRNMVPDIESIAQDSLRSWEGTMINTYQEMKTYTFNVALLSIFGKDEVLYREDLKRCYYILEKGYNSMPVNLPGTLFHKSMKARKELSQILARILSERRQNGSSHNDLLGSFMGDKEELTDEQIADNIIGVIFAARDTTASVMSWILKYLAENPNVLEAVTEEQMAIRKDKEEGESLTWGDTKKMPLTSRVIQETLRVASILSFTFREAVEDVEYEGYLIPKGWKVLPLFRNIHHSADIFSNPGKFDPSRFEVAPKPN…
AtCYP707A2	MQISSSSSSNFFSSLYADEPALITLTIVVVVVVLLFKWWLHWKEQRLRLPPGSMGLPYIGETLRLYTENPNSFFATRQNKYGDIFKTHILGCPCVMISSPEAARMVLVSKAHLFKPTYPPSKERMIGPEALFFHQGPYHSTLKRLVQSSFMPSALRPTVSHIELLVLQTLSSWTSQKSINTLEYMKRYAFDVAIMSAFGDKEEPTTIDVIKLLYQRLERGYNSMPLDLPGTLFHKSMKARIELSEELRKVIEKRRENGREEGGLLGVLLGAKDQKRNGLSDSQIADNIIGVIFAATDTTASVLTWLLKYLHDHPNLLQEVSREQFSIRQKIKKENRRISWEDTRKMPLTTRVIQETLRAASVLSFTFREAVQDVEYDGYLIPKGWKVLPLFRRIHHSSE…
AtCYP707A3	MDFSGLFLTLSAAALFLCLLRFIAGVRRSSSTKLPLPPGTMGYPYVGETFQLYSQDPNVFFAAKQRRYGSVFKTHVLGCPCVMISSPEAAKFVLVTKSHLFKPTFPASKERMLGKQAIFFHQGDYHSKLRKLVLRAFMPDAIRNMVPHIESIAQESLNSWDGTQLNTYQEMKTYTFNVALISILGKDEVYYREDLKRCYYILEKGYNSMPINLPGTLFHKAMKARKELAQILANILSKRRQNPSSHTDLLGSFMEDKAGLTDEQIADNIIGVIFAARDTTASVLTWILKYLADNPTVLEAVTEEQMAIRKDKKEGESLTWEDTKKMPLTYRVIQETLRAATILSFTFREAVEDVEYEGYLIPKGWKVLPLFRNIHHNADIFSDPGKFDPSRFEVAPKPN…
AtCYP707A4	MAEIWFLVVPILILCLLLVRVIVSKKKKNSRGKLPPGSMGWPYLGETLQLYSQNPNVFFTSKQKRYGEIFKTRILGYPCVMLASPEAARFVLVTHAHMFKPTYPRSKEKLIGPSALFFHQGDYHSHIRKLVQSSFYPETIRKLIPDIEHIALSSLQSWANMPIVSTYQEMKKFAFDVGILAIFGHLESSYKEILKHNYNIVDKGYNSFPMSLPGTSYHKALMARKQLKTIVSEIICERREKRALQTDFLGHLLNFKNEKGRVLTQEQIADNIIGVLFAAQDTTASCLTWILKYLHDDQKLLEAVKAEQKAIYEENSREKKPLTWRQTRNMPLTHKVIVESLRMASIISFTFREAVVDVEYKGYLIPKGWKVMPLFRNIHHNPKYFSNPEVFDPSRFEVN…
AtCYP708A1	MNNLISLDIMKEMWGVALSFVIALVVVKISLWLYRWANPNCSGKLPPGSMGFPVIGETVEFFKPYSFNEIHPFVKKRMFKHGGSLFRTNILGSKTIVSTDPEVNFEILKQENRCFIMSYPEALVRIFGKDNLFFKQGKDFHRYMRHIALQLLGPECLKQRFIQQIDIATSEHLKSVSFQGVVDVKDTSGRLILEQMILMIISNIKPETKSKLIESFRDFSFDLVRSPFDPSFWNALYNGLMVRSARSNVMKMLKRMFKERREEATSDDSKYGDFMETMIYEVEKEGDTINEERSVELILSLLIASYETTSTMTALTVKFIAENPKVLMELKREHETILQNRADKESGVTWKEYRSMMNFTHMVINESLRLGSLSPAMFRKAVNDVEIKGYTIPAGWIVL…
AtCYP708A2	MSFVWSAAVWVIAVAAVVISKWLYRWSNPKCNGKLPPGSMGLPIIGETCDFFEPHGLYEISPFVKKRMLKYGPLFRTNIFGSNTVVLTEPDIIFEVFRQENKSFVFSYPEAFVKPFGKENVFLKHGNIHKHVKQISLQHLGSEALKKKMIGEIDRVTYEHLRSKANQGSFDAKEAVESVIMAHLTPKIISNLKPETQATLVDNIMALGSEWFQSPLKLTTLISIYKVFIARRYALQVIKDVFTRRKASREMCGDFLDTMVEEGEKEDVIFNEESAINLIFAILVVAKESTSSVTSLAIKFLAENHKALAELKREHAAILQNRNGKGAGVSWEEYRHQMTFTNMVINETLRMANMAPIMYRKAVNDVEIKGYTIPAGWIVAVIPPAVHFNDAIYENPLEF…
AtCYP708A3	MSSIWNVAMLMVALVVVRISHWLYRWSNPKCPGKLPPGSMGFPIIGETLDFFKPCGVEGIPTFVKKRMIRYGPLFRTNIFGSKTVVSTDPDVIHQIFRQENTSFELGYPDIFVKVFGKDNLFLKEVFIHKYLQKITMQILGSEGLKQTMLGNMDKATRDHIRSIASQGSFNVRKEVENLVVAYMTPKLISNLKPETQSKLIDNLNAFNLDWFKSFLRLSTWKAVTKALKSREEAIQVMKDVLMMRKETREKQEDFLNTLLEELEKDGSFFDQGSAINLIFLLAFALREGTSSCTALAVKFISKDPKVLAELKREHKAIVDNRKDKEAGVSWEEYRHNMTFTNMVSNEVLRLANTTPLLFRKAVQDVEIKGYTIPAGWIVAVAPSAVHFDPAIYENPFEF…
AtCYP708A4	MNLFWNTGFCVIVLVVARVGHWWYQWSNPKSNGKLPPGSMGFPIIGETLDFFKPYGFYEISPYLKKKMLRYGPLFRTNILGVKTVVSTDKDVNMEILRQENKSFILSYPDGLMKPLGKDSLFLKIGNIHKHIKQITLHLLSSEGLKRKILKDMDRVTREHLSSKAKTGRLDVKDAVSKLIIAHLTPKMMSNLKPQTQAKLMGIFKAFTFDWFRTSYLISAGKGLYNTLWACREGMREIKDIYTMRKTSEEKYDDFLNTAIEESEKAGELLNENAIITLIFTLSCVTQDTTSKAICLAVKFLLENPKVLAELKKEHEVILESREDKEGGVTWEEYRHKMTFTNMVINESLRITNLAPMLFRKAVKDVEIKGYTIPAGWIVMIIPSVVHFDPEIYENPFEF…
AtCYP709B1	MGLVIFLALIVLILIIGLRIFKAFMILVWHPFVLTRRLKNQGISGPNYRIFYGNLSEIKKMKRESHLSILDPSSNDIFPRILPHYQKWMSQYGETFLYWNGTEPRICISDPELAKTMLSNKLGFFVKSKARPEAVKLVGSKGLVFIEGADWVRHRRILNPAFSIDRLKIMTTVMVDCTLKMLEEWRKESTKEETEHPKIKKEMNEEFQRLTADIIATSAFGSSYVEGIEVFRSQMELKRCYTTSLNQVSIPGTQYLPTPSNIRVWKLERKMDNSIKRIISSRLQSKSDYGDDLLGILLKAYNTEGKERKMSIEEIIHECRTFFFGGHETTSNLLAWTTMLLSLHQDWQEKLREEIFKECGKEKTPDSETFSKLKLMNMVIMESLRLYGPVSALAREASV…
AtCYP709B2	MELLSTINLLAIALVLLVVPKIYGACRILVWRPWMLSRRFKKQGISGPKYRILYGNLREIRKMKNEAKLMVLDPNSNDIVPRVLPHLQQWKSQYGETFLYWQGTDPRLCISDHELAKQILSNKFVFFSKSKTKPEILKLSGNGLIFVNGLDWVRHRRILNPAFSMDKLKLMTQLMVDCTFRMFLEWKKQRNGVETEQFVLISREFKRLTADIIATAAFGSSYAEGIEVFKSQLELQKCCAAALTDLYFPGIQYLPTPSNLQIWKLDMKVNSSIKRIIDARLTSESKDYGNDLLGIMLTAASSNESEKKMSIDEIIEECKTFFFAGHETTANLLTWSTMLLSLHQDWQEKLREEVFNECGKDKIPDAETCSKLKLMNTVFMESLRLYGPVLNLLRLASED…
AtCYP709B3	MELISTINLLTIVLLLFVVSKIWKACWILLLRPLMLSKRFKKQGISGPKYKILYGNLSEIKKMKKEADLCVLDPNSNDIFPRVFPQYHQWMSQYGDTFLFWTGTKPTIYISNHELAKQVLSSKFGFTIIPVKRPEVFILFGKGLSFIQGDDWIRHRRILNPAFSMDRLKAMTQPMGDCTLRIFEEWRKQRRNGEVLIKIEISKEFHKLTADIIATTAFGSSYAEGIELCRSQTELEKYYISSLTNVFIPGTQYLPTPTNLKLWELHKKVKNSIKRIIDSRLKSKCKTYGYGDDLLGVMLTAAKSNEYERKMRMDEIIEECKNFYYAGQGTTSILLTWTTMLLSLHQGWQEKLREEVFNECGKDKIPDTDTFSKLKLMNMVLMESLRLYGPVIKISREAT…
AtCYP710A1	MVFSVSIFASLAPYLISAFLLFLLVEQLSYLFKKRNIPGPFFVPPIIGNAVALVRDPTSFWDKQSSTANISGLSANYLIGKFIVYIRDTELSHQIFSNVRPDAFHLIGHPFGKKLFGDHNLIYMFGEDHKSVRRQLAPNFTPKALSTYSALQQLVILRHLRQWEGSTSGGSRPVSLRQLVRELNLETSQTVFVGPYLDKEAKNRFRTDYNLFNLGSMALPIDLPGFAFGEARRAVKRLGETLGICAGKSKARMAAGEEPACLIDFWMQAIVAENPQPPHSGDEEIGGLLFDFLFAAQDASTSSLLWAVTLLDSEPEVLNRVREEVAKIWSPESNALITVDQLAEMKYTRSVAREVIRYRPPATMVPHVAAIDFPLTETYTIPKGTIVFPSVFDSSFQGF…
AtCYP710A2	MVFSVSIFASLAPYLVSALLLFFLIEQLSYLVKKRNLPGPLFVPPIIGNAISLVRDPTSFWFKQSDTAGTSPGLAANYLIGKFIIYIRDTELSHQIFSNVRLEAFHPLGHPFGKQLFGDHSLIYLFGEDHKTVRRHLAPNFTPKALSTYSDLQQIVMLRHLRQWEESFSGGTKPVSMRDLVRELNLETSQTVFVGPYLDKEARNTFCTDYNLFNLGSMALPINLPGFAFNKARRAVMNLEKTLSVCAGKSKKRMATGEEPTCLIDFWMHAFVTEIESGNPPPLHSEDEAIGGLLFDFLFAAQDASTSSLLWAVTFLESHPKVLSKVREEVAKIWSPQSGHLITADQLAEMKYTRAVAREVVRYRPPATMVPHIATNDFPLTESYTIPKGTIVFPSVFDA…
AtCYP710A3	MVSSVSLFASLTPYLVSALLLFLLLEQLFYRLKKRNLPGPLFVFPIIGNVVALIRDPTSFWDKQSAMADTSVGLSVNYLIGKFIIYIKDAELSNKVFSNIRPDAFQLVGHPFGKKLFGDHSLIFMFGENHKSVRRQVAPNFTRKPLSAYSSLQQIVILRHLRQWEESFSSGSRPVSMRQLIRELNLETSQTVFVGPYLDKEVKNTIRDDYNVFNPGTMALPIDLPGFTFGEARRAVSRLVNTMSLCVRKSKEKMAAGENPTCLVDFWTHSIVAESPPPPHSKDEEISCVLVDFLFASQDASTSSLLWAVVLLESEPEVLRRVREDVARFWSPESKESITADQLAEMKYIRAVAREVLRYRPPASMVPHVAVSDFRLTESYTIPKGTIVFPSLFDASFQG…
AtCYP710A4	MVSSVSLFASLTPYLVSALLLFLLLEQLFYRVKKRNLPGPLFVFPIIGNVVALIRDPTSFWDKQSAMADTSVGLSVNYLIGKFIIYIKDAELSNKVLSNIRPDAFQLTGHPFGKKLFGDHSLIFMFGEDHKSVRRQVAPNFTRKPLSAYSSLQQIVILRHLRQWEESFSSGSRPVSMRQLIRELNLETSQTVFVGPYLDKEVKKTICDDYSLLTLGTMAIPIDLPGFTFGEARQAVSRLVNTMSVCVGKSKAKMAAGENPTCLVDFWTHSIIEENPPPPHSKDKEISCVLVDFMFASQDASTSSLLWAVVMLESEPEVLRRVREDVARFWSSESNELITADQLAEMKYTRAVAREVLRYRPPASMIPHVAVSDFRLTESYTIPKGTIVFPSLFDASFQG…
AtCYP711A1	MKTQHQWWEVLDPFLTQHEALIAFLTFAAVVIVIYLYRPSWSVCNVPGPTAMPLVGHLPLMAKYGPDVFSVLAKQYGPIFRFQMGRQPLIIIAEAELCREVGIKKFKDLPNRSIPSPISASPLHKKGLFFTRDKRWSKMRNTILSLYQPSHLTSLIPTMHSFITSATHNLDSKPRDIVFSNLFLKLTTDIIGQAAFGVDFGLSGKKPIKDVEVTDFINQHVYSTTQLKMDLSGSLSIILGLLIPILQEPFRQVLKRIPGTMDWRVEKTNARLSGQLNEIVSKRAKEAETDSKDFLSLILKARESDPFAKNIFTSDYISAVTYEHLLAGSATTAFTLSSVLYLVSGHLDVEKRLLQEIDGFGNRDLIPTAHDLQHKFPYLDQVIKEAMRFYMVSPLVARE…
AtCYP714A1	MENFMVEMAKTISWIVVIGVLGLGIRVYGKVMAEQWRMRRKLTMQGVKGPPPSLFRGNVPEMQKIQSQIMSNSKHYSGDNIIAHDYTSSLFPYLDHWRKQYGRVYTYSTGVKQHLYMNHPELVKELNQANTLNLGKVSYVTKRLKSILGRGVITSNGPHWAHQRRIIAPEFFLDKVKGMVGLVVESAMPMLSKWEEMMKREGEMVCDIIVDEDLRAASADVISRACFGSSFSKGKEIFSKLRCLQKAITHNNILFSLNGFTDVVFGTKKHGNGKIDELERHIESLIWETVKERERECVGDHKKDLMQLILEGARSSCDGNLEDKTQSYKSFVVDNCKSIYFAGHETSAVAVSWCLMLLALNPSWQTRIRDEVFLHCKNGIPDADSISNLKTVTMVIQET…
AtCYP714A2	MESLVVHTVNAIWCIVIVGIFSVGYHVYGRAVVEQWRMRRSLKLQGVKGPPPSIFNGNVSEMQRIQSEAKHCSGDNIISHDYSSSLFPHFDHWRKQYGRIYTYSTGLKQHLYINHPEMVKELSQTNTLNLGRITHITKRLNPILGNGIITSNGPHWAHQRRIIAYEFTHDKIKVKGMVGLMVESAMPMLNKWEEMVKRGGEMGCDIRVDEDLKDVSADVIAKACFGSSFSKGKAIFSMIRDLLTAITKRSVLFRFNGFTDMVFGSKKHGDVDIDALEMELESSIWETVKEREIECKDTHKKDLMQLILEGAMRSCDGNLWDKSAYRRFVVDNCKSIYFAGHDSTAVSVSWCLMLLALNPSWQVKIRDEILSSCKNGIPDAESIPNLKTVTMVIQETMRL…
AtCYP715A1	MEFFEMSRVWYIFFKVFVVVICLMFLKLFLRCWIWPVRAQKKLRGNGFVGPAPSFPFGNLNDMKKLKMASVVVDNSKSSTIINHDIHSIALPHFARWQQEYGKVFVYWLGIEPFVYVADPEFLSVMSKGVLGKSWGKPNVFKKDREPMFGTGLVMVEGDDWTRHRHIITPAFAPLNLKVMTNMMVESVSNMLDRWGIQINSGNPEFDMESEIIGTAGEIIAKTSFGVTGENGTQVLKNLRAVQFALFNSNRYVGVPFSNILSYKQTVKAKGLGHEIDGLLLSFINKRKISLAEGDDQGHDLLGMLLKADQKGNFTAKELVDECKTFFFAGHETTALALTWTFMLLAIHPEWQDTIREEIREVIGDSKIEYNKLAGLKKMSWVMNEVLRLYPPAPNAQRQ…
AtCYP716A1	MYMAIMIILFLSSILLSLLLLLRKHLSHFSYPNLPPGNTGLPLIGESFSFLSAGRQGHPEKFITDRVRRFSSSSSCVFKTHLFGSPTAVVTGASGNKFLFTNENKLVVSWWPDSVNKIFPSSMQTSSKEEARKLRMLLSQFMKPEALRRYVGVMDEIAQRHFETEWANQDQVIVFPLTKKFTFSIACRSFLSMEDPARVRQLEEQFNTVAVGIFSIPIDLPGTRFNRAIKASRLLRKEVSAIVRQRKEELKAGKALEEHDILSHMLMNIGETKDEDLADKIIGLLIGGHDTASIVCTFVVNYLAEFPHVYQRVLQEQKEILKEKKEKEGLRWEDIEKMRYSWNVACEVMRIVPPLSGTFREAIDHFSFKGFYIPKGWKLYWSATATHMNPDYFPEPERF…
AtCYP716A2	MYLTIIFLFISSIIFPLLFFLGKHLSNFRYPNLPPGKIGFPLIGETLSFLSAGRQGHPEKFVTDRVRHFSSGIFKTHLFGSPFAVVTGASGNKFLFTNENKLVISWWPDSVNKIFPSSTQTSSKEEAIKTRMLLMPSMKPEALRRYVGVMDEIAQKHFETEWANQDQLIVFPLTKKFTFSIACRLFLSMDDLERVRKLEEPFTTVMTGVFSIPIDLPGTRFNRAIKASRLLSKEVSTIIRQRKEELKAGKVSVEQDILSHMLMNIGETKDEDLADKIIALLIGGHDTTSIVCTFVVNYLAEFPHIYQRVLEEQKEILNNKDVNEKLTWEDIEKMRYSWNVACEVMRIVPPLAGTFREAIDHFSFKGFYIPKGWKLYWSATATHKNPEYFPEPEKFEPSR…
AtCYP718	MVLEPNFVLSWVFLCIAATISSTLFFFRKKHHRFITKKIQKKKKLLPGEMGLPWIGETMDFYKAQKSNRVFEDFVNPRIIKHGNIFKTRIMGSPTIVVNGAEANRLILSNEFSLVVSSWPSSSVQLMGMNCIMAKQGEKHRVLRGIVANSLSYIGLESLIPKLCDTVKFHHETEWRGKEEISLYRSAKVLTFTVVFECLYGIKVEIGMLEVFERVLEGVFALPVEFPCSKFARAKKARLEIETFLVGKVREKRREMEKEGAEKPNTTLFSRLVEELIKGVITEEEVVDNMVLLVFAAHDTTSYAMSMTFKMLAQHPTCRDTLLQEHAQIKANKGEGEYLTVEDVKKMKYSWQVVRETMRLSPPIFGSFRKAVADIDYGGYTIPKGWKILWTTYGTHYNP…
AtCYP71A12	MEMILMVSLCLTTLITLFLLKQFLKRTANKVNLPPSPWRLPLIGNLHQLSLHPHRSLHSLSLRYGPLMLLHFGRVPILVVSSGEAAQEVLKTHDLKFANRPRSKAVHGLMNGGRDVVFGPYGEYWRQMKSVCILNLLTNKMVASFEKIREEELNEMIKKLEKASSSSSSENLSELFVTLPSDVTSRIALGRKHSEDETARDLKKRVRQIMELLGEFPIGDYVPALAWIDRINGFNARIKEVSQGFSDLMDKVVQEHLEAGNHKEDFVDILLSIESEKSIGFQAQRDDIKFMILDMFIGGTSTSSTLLEWIMTELIRNPNVMKKLQDEIRSTIRPHGSYIKEKDVENMKYLKAVIKEVFRVHPPLPLILPRLLSEDVKVKGYNIAAGTEVIINAWAIQRD…
AtCYP71A13	MEMILSISLCLTTLITLLLLRRFLKRTATKVNLPPSPWRLPVIGNLHQLSLHPHRSLRSLSLRYGPLMLLHFGRVPILVVSSGEAAQEVLKTHDHKFANRPRSKAVHGLMNGGRDVVFAPYGEYWRQMKSVCILNLLTNKMVESFEKVREDEVNAMIEKLEKASSSSSSENLSELFITLPSDVTSRVALGRKHSEDETARDLKKRVRQIMELLGEFPIGEYVPILAWIDGIRGFNNKIKEVSRGFSDLMDKVVQEHLEASNDKADFVDILLSIEKDKNSGFQVQRNDIKFMILDMFIGGTSTTSTLLEWTMTELIRSPKSMKKLQDEIRSTIRPHGSYIKEKEVENMKYLKAVIKEVLRLHPSLPMILPRLLSEDVKVKGYNIAAGTEVIINAWAIQRD…
AtCYP71A14	MEMIIISLCLATILALLLLKQFLNRTYTAKVNLPPSPWRVPVIGNLHQLSLHPHRSLRSLSHRYGPLMLLHFGRVPVLVVSSSDVAHDLMKTHDLKVANRPQLKVVEKIFNGGREMVFSPYGEYWRQIKSVCIVNLLNKKKVQSFEKVREEEISEMMERVEKASSDSSPLNLSELLLTLTSDVTSRVSLGRKYSKEESMSDFKIQMRKITELVGGFPVGEYIPCLAWIDKLRGVDEKAEEVSKAFGDLMEKVLQEHLDATDKPTLDFVDVLLSLERHERNGVQIRRSDIKFLILDMFLAGTETTYALLEWIMTELIRHPECMKKLQDEIRAKATKLILYISEEDVEDMKYLKAVVKEVLRLHPPLPLLVPRELSEDIKLKGYDIAAGTQVIINAWAIQR…
AtCYP71A15	MEIIIISLCLATILAFLLLKPLLNRTVAKDNLPPSPWRVPVIGNLHQLSLHPHRSLRSLSHRYGPLMLLHFGRVPILVVSSSDVAHDLMKTHDLKVANRPRLKVIETILNGGREVVFSPYGDYWRQIKTVCVVHLLNKKMVQSFAKVREEERSVMMEKVEKASSDSSPLNLSKLLITLTSDVASRVSFGKKHSNEASMSDFKNQVRKITELVGGFPVSEYIPCLAWIDQIRGLYNRAEEVSKIFGDLMDKVVQEHLDATNKPTKDFVDILLSFERQSKDGIEVRRSDIKFIILDIFLGGTTTTNSLLEWTMTELIRHPECMKKLQDEIRGDATNLTIYRSHEEVEDMKYLKAVIKEGLRLHPPFPLLVLRLLTQDVKLKGYDIAAGTQVITNAWAIQRD…
AtCYP71A16	MEMMILISLCLTTFLTILLFFKSLLKRPNSNLPPSPWRLPVIGNLHQLSLHPHRALSSLSARHGPLMLLRFGRVPVLIVSSADVAHDVMKTHDLKFANRPITKSAHKISNGGRDLVFAPYGEYWRNVKSLCTIHLLSNKMVQSSEKRREEEITLLMETLEEASLSSSSVNLSKLITNMVSDIMGKVVLGKKYSGEEGTIDVKTITKSFLDAVGLSPVGEYIPSLAWIGKITGSDGKLEKITKQFGDFIEKVLQEHEDTTADKETPDFVDMLLTIQRDETAQCQLDKSDLKVIIFEMFLGSTTTTSAVIEWAMTRLMRNPECLKKLQDEIRSVSKMNSYVSGKEVENMNYLKAVIKEVLRLHPPLPLLVPRLLSEDVKLKGYDITAGTQVIINAWAIQRD…
AtCYP71A18	MEMTLMVSLCLTTLLTLLLLKKFLKRTAKKVNLPPSPWRIPVIGNLHQLSLHPHRSLHSLSLRYGPLMLLHFGRVPILVVSSSEAAHEILKTHDLKFANRPKSKAVHGLMNGGRDVVFGPYGEYWRQMKSVCILNLLTNKMVASFEKVREEEVNAMMEKLEKASCSSSAENLSELFVTLTSDVTSRVSLGKKYWEDETAGGLKKRVRQIMELLREFPIGDYVPALAWIDRINGFNSKIVEVSRAYSDLMEKVVQEHLEAGEHKADFVNILLSIEKEKNNGFKVQRNDIKFMILDMFIGGISTSSTLLEWIMTELIRNPECMKKLQNEIRSTIRPHGSYIKEKEVENMRYLKAVIKEVFRVHPPLPLILPRLLTEDVKVKGYDIAAGTEVLINAWSIHRD…
AtCYP71A19	MEIILVTLCLTTLLALLLLKSILKRTTTNNLNLPPSPWRLPVIGNLHQLSLNTHRSLRSLSLRYGPLMLLHFGRTPVLIVSSADVAHDILKTYDVICANRPKTKVIDKILRGGRDVAFAPYGEYWKQMKSICIQNLLSNKMVRSYKKIREDEIKLMIEKVENASSCSPPSPVNLSQLFMTLTNDIICRAALGRKYSSKEDGIDVENIVRAFSALVGEFPIGEYIPSLSWIDKIRGQDHKMEEVDKRFDEFLERVVKEHEDANKDTRSDLVDTLLTIQSDKSALKLIIWDMFLAGTATSLSFLEWAMTELMRNPKVMKKLQEEIRSSSRQGLFVTEKEAEKMDYLQAVIKEALRLRPPAPLMVPRVFSEDVTLKGYNIPAGTQVIINAWAIQRDTTTWGI…
AtCYP71A20	MILITLCLTTLLALLLKSILKRTATKNFNLPPSPWRLPVIGNLHQLSLHTHRSLRSLSLRYGPLMLLHFGRTPVLIVSSADVAHDVMKTHDLVCANRPKTKVVDKILSGGRDVAFAPYGEYWRQMKSICIQNLLNNKMVRSYEKIREEEIKRMIEKLEKASCSSSPSPVNLSQILMTLTNDIICRVALGRKYSGKKDGIDVENIVRTFAALLGEFPVGEYIPSLSWIDRIRGLDHKMEVVDKRFDEFLERVVKEHEEADKETRSDLVDKLLTIQSDKTGQFELEKSALKLIIWDMFLAGTATTLSFLEWAMTELMRNPKVMKKLQEEIRSSSPQDLFVTEKEAEKMNYLQAVIKEALRLRPPAPLLVPRVLSEDVKLKGYNIPAGTQVIVNAWAIQRDT…
AtCYP71A21	MESMTMIILQSLIIFITILFFKKQKRGKKSNTPRSPPRLPLIGNLHQLGHHPHRSLCSLSHRYGPLMLLHLGRVPVLVVSSADVARDILKTHDRVFASRPRSKLFEKLFYDGRDVAFAPYGEYWRQIKSVCVLRLLSNKMVTSFRNVRQEEISLMMEKIQKSSSLQVNVSELLGSLTNDVISRIALGRKYSGETDSKELMKRLMMLMGEFSVGTYVPWLGWIDWISGLDGQLNKTGNDLDEFLEKVVQDHVDGDGQRTDFVDVLLRIQREKSIGFEIDRLCIKAIVLDVLVAGTDSSYALMDWAMTELLRHPECLRTLQEEVRTICKGNLSVSEEDIQNMSYLKAVIKETTRLHPPLPLLAPHESIQDVILGDYHIPAGTQVMINAWAIGREAATWGPD…
AtCYP71A22	MESMIRIILLSLIIFITILFFIKQKKGKKSNTPASPPRLPLIGNLHQLGRHPHRSLCSLSNRYGPLMLLRFGLVPVLVVSSADVARDILKTYDRVFASRPRSKIFEKIFYEARDVALAPYGEYWRQMKSVCVLHLLTNKMVRSFRNVRQEEISLMMEKIQKSSSLQVNLSELLGSLTNDVISRVALGRKYSDETDFKELMKRLTKLLGEFCVGTYVPWLAWIDWISGLDGQLKKTGNDLDEFLEKVVQDHEDGDAQRTDFVDVLLRIQREKSVGFEIDRLSIKAIILDVVVGGTDTSYALMEWAMTELLHRPECLNRLQEEVRTICKGNSSVSEDDIKDMNYLKAVIKETMRLHPPLPLMVPHESTQDVRLGDYHIPAGTQVMINAWAIGREAATWGPD…
AtCYP71A23	MILFLCLIILFIITILFFKKHKTVNKIINFPSPPRLPLIGNLHQLSQHPHRSLCYLSHRYGPLMLLHFGSVPVIVASTAEAARDVLKTHDRVFASRPRSKIFEKLLYKSRNMASAPYGEYWRQMKSVSVLHLLSNKMVRSFQDVRQEEITLMMETIRKSSSKPVNLSKILSSLTNDVICRVALGRKYGVGTDFKELIDRLMRQLGTFTIGSYVPWLAWTDWVSGLEARLEKTANDFDKLLERIVQDHEDGDGDKTDFVDVLLAAQRDKSFGFDIDRLSIKAIVLDAFVGGTDTSSTLVEWEMTELLRHPTCLKKLQEEVRTICKGKSSVSEDDIQGMEYLKAVVKEALRLHPPVPLMVPHQSTQDVRLRDNHIPAGTQVIVNLWAVGREAATWGPDANE…
AtCYP71A24	MMMMIILLLCSIILITILFFKKQSRGKKSNAPPSPPRLPLIRNLHQLGRHPHRSLCSLSHRYGPLMLLHFGSVPVLVVSSADAAKDVLKTHDRVFASRPRSKIFDKIFYNGRDVALAPYGEYWRQMKSVCVLHLFSNKMVRSFRDVRQEEISLMIEKIRISSSLRINLSEILVNLTNNVICRVALGRKYGGKTDFKDLMKRLTRLLGEFSVGSYVSWLAWIDWIRGLDGQLIKISNDLDEFLERVVQDHVDGDGHKNDFVDFLLTIEREKSVGFEIDRLSIKAIILDVFVGDMDTTYTLLEWAMTELLCHHECLDRLQEEVRMVCKDKSGVSEDDLQDMKYLKAVIKETLRLHPPLPLMVPHESTHDVKLRDYHIPAGTHVMINAWAIGREAATWGPDA…
AtCYP71A25	MMMMIILLWSIIFMTILFLKKQLSGKKGKTPPSPPGLPLIGNLHQLGRHTHRSLCDLSRRYGPLMLLHLGRVPVLIVSSADMAQEILKTHDQAFANRPRSKLSQKLLYNNRDVASAPYGEYWRQMKSVCVIHLLSNKMVRSFRDVREEEITLMMAKIRKSSSLPFNVSKVLECLTNDVICRVALGRKYGGETDFKKLTDRLSELLGTFSIGSFVPWLAWVDWIRGWDAQLDKMGKDLDDFFEKVVQDHEDGDRRDGTDLIDALLRVKREKSPGFEIERVSIKAITLDVFVGGSDTSFTLLEWAMTELLRHPKSLNRLQEEVRTICKGKSRVSEDDIQGMKYLKAVIKEALRLHPPFPMMAPHESTEDVKLRDYHIPAGTQVMMNAWAIGREVATWGPDA…
AtCYP71A26	MMIMFFLLCSIIFVVTIIIFRKQKRGKKRNTLPSPPGLPLIGNLHQLGRHPHRSLCSLSHRYGPLMLLHFGRVPVLVVSSAELARDVLKTHDRVFASRPRSKIFEKLLYDKHDVASAPYGEYWRQMKSVCVLHLFSNKMVRSFREVREEEISLMMEKIRKSISLPVNLSKILVSLTNDVICKVALGRKYGGETDFKELMERLNKLLGTFSVGSYVPWLAWIDWIRGLDCQLEKTANDVDKFFERVVQDHVDGNRDMTDFVDVLLAIQRDKTVGFEINRVSIKAIVMNVFVGGTDTSSTLMEWAMTELLRHPKCLKRLQEEVRTICKDKSSVSEEEIQNMSYLKAVIKEALRLHPPLPLMVPHESTQDVRLGDHHIPAGTQVLINAWAIGREAATWGPDV…
AtCYP71A27	MEMILISLCLTTLLAFLFLKPLLKRITTTKPKLPPSPWRLPVIGNLHQLGPNPHRYLHSLSLRYGPLMLLHFGRVPVLVVSCPDVTNDIMKTHDLKFANRPKSKAINIFMEGGRDIIFGPYGEDWKSMKSLGVVHLLNNKMVRSFENLREEEIKVMTEKLEEASSSSSSVNLSKLLMTLTNDIICRITLGRKYNEEEGGIDIKNLVMTSSEFFGKFFFGDFIPSLAWIDWISGIDDKMKDINNKLDCFLDSMVQEHVDADHKEPSDFIDMLLLIQKDKTKRFKFDRSDLILILKDMFFSGTATTASQLEWTMTELMRHPECMKKLQDEINSFSTHNLNVTEKEVEKMNYLHCVIKEGLRLHPSGPLLFRLPSEDVQLKGYDISAGTHVIINAWALQRNP…
AtCYP71A28	MILISLCFTTFLAFLFLNPLLKRTTTTKPNQPPSPWRLPVIGYLHQLSLHPHRSFRSLSLRLWSAHAPSLRSCPYPRFSKYISSSDVAHDVMKTHDLKFANRPKTKAVDIIINGGRDVAFSSYGEYWRQMKSLCTVHLLGRQMVRSFEKVREEEITSVIWKLEKQSSSSLPVNLSDLLLNMSNDVICRIAVGRKYSREENTSDFENQLRKVMELLGAFPVGDYIPGLAWIDKVRGLDRKMEEVSKTFVEFLERVVQEHVDEGENKETFDFVDILLIQLEKTNEFELERSDIRLIILEFFLGGTTTTFTAIDWAMTLVVRHPESMKKLQEEIQTYSRNKLYVPEEEVENMKYLKAVIKEVFRLHPPGPLSIPRQLSEDVFINAWAIHRDTEKWGPYAEEF…
AtCYP71B10	MTVLWFVSLILLISILLVAVKHSKRRWVRQPPSPPGLPIIGNLHQLGELPHQSLCKLSKKYGPVMLLKLGRVPTVIVSTPETAKQVLKDYDLHCCSRPSLEGTRKLSYNYLDIAFSRFDDYWKELRKLCVEELFCNKRINSIQPIKEAEMEKLIDSIAESASQKTLVNLSDTFLSLNVNVICKAVFGVNFQGTVLNNDKFQDLVHEALEMLGSFSASDFFPYVGWIVDWFTGLHARRERSVRDLDAFYEQMIDLHLQKNREESEDDFVDLLLRLEKEEAVLGYGKLTRNHIKAILMNILLGGINTSAITMTWAMAELIRNPRVMKKVQSEIRAQIGKNNKTRIISLDEINHLSYLNMVIKETCRLHPVAPLLVPREVISEFKINGYTIQPKTRLHVNVW…
AtCYP71B11	MSLWYIIVAFVFFSTIIIVRNTRKTKKNLPPGPPRLPIIGNLHQLGSKPHSSMFKLSEKYGPLMALRFGSVSTVVASTPETVKEVLKTFDAECCSRPYMTYPARLTYNLKDIGFCPYTKYWREVRKMTVVELYTAKRVQSFQHTRKEEVASLVDFITQAASLEKPVNLNTKLMKLSGSVICRVVFGINLKGSKLENLYEEVIQGTMEVVGSFAAADYFPIIGRIIDRITGLHSKCEKIFKAMDAFFDQSIKHHLEDESIKDDIIDLLLKMERGEIELGEFQLTRDNTKGILFNILNAGIDTSAQVMTWVMTYLISNPRVMKKAQAEVREVIKNKDDIIEEDIERLEYLKMVVKETFRVLPLVPLLIPREASKDVKIGGYDIPKKTWIHVNIWAIHRNPN…
AtCYP71B12	MSLWYIIVAFVFFSSMIIVRIIRKTKKNLPPGPPRLPIIGNLHQLGSKPHRSMFKLSETYGPLMSLKFGSVSTVVASTPETVKEVLKTFDVECCSRPNMTYPARVTYNLKDLCFSPYSKYWREVRKMTVVELYTAKRVQSFQHTRKEEVAALVDFIKQAASLEKPVNLNKKLMKLSGSVICRVAFGINLQGSKLENTYEEVIQGTVELVGSFAAADYFPVVGRIIDRITGLHSKCEKLFKAMDAFFDQSIKHHLEDEIIKDDIIDLLLKMERGETTLGEFQLTRDHTKGILANILNAGIDTSAQVMTWVMTYLISNPRVLKKAQAEVREVIKHKDDIIEEDIERLQYLKMVIKETFRINPLVPLLIPREASKDVKIGGYNIPKKTWIHVNIWAIHRNPN…
AtCYP71B13	MSLWYIIVVFVFFASIFIAKNTRKTKKNLPPGPPRLPIIGNLHQLGSKPHRSMFKLSEKYGPLVYLKLGKVPSVVASTPETVKDVLKTFDKDCCSRAFLTYPARISYNLKDLAFAPYSKYWKAVRKMTVVELYTAKRVKSFRNIREEEVASFVEFIKHSASLEEIVNLNQTLVKLSGSVICRVGFGINLEGSKLENTYEEVIHGTMEVLGSFAASDYFPVIGGIIDRITGLHNKCEKVFKGTDSFFDHCIKHHLEDGGSKDDIVDLLLKVERGEIGLGEFQFTRNHTKGILLDILLAGVDTSGHTITWVMTHLIKNPRVMKKAQAEVREVIKNKDNITEEDIEGLEYLKMVVKETLRINPLVPLLTPREASKDVKIGGYNIPKKTWIHVNIWAIHRNPN…
AtCYP71B14	MIWWFIVGASFFFAFILIAKDTRTTKKNLPPGPPRLPIIGNLHQLGSKPQRSLFKLSEKYGSLMSLKFGNVSAVVASTPETVKDVLKTFDAECCSRPYMTYPARVTYNFNDLAFSPYSKYWREVRKMTVIELYTAKRVKSFQNVRQEEVASFVDFIKQHASLEKTVNMKQKLVKLSGSVICKVGFGISLEWSKLANTYEEVIQGTMEVVGRFAAADYFPIIGRIIDRITGLHSKCEKVFKEMDSFFDQSIKHHLEDTNIKDDIIGLLLKMEKGETGLGEFQLTRNHTKGILLNVLIAGVDTSGHTVTWVMTHLIKNPRVMKKAQAEVREVIKNKDDITEEDIERLEYLKMVIKETLRINPLVPLLIPREASKYIKIGGYDIPKKTWIYVNIWAVQRNPN…
AtCYP71B15	MSVFLCFLVLLPLILIFLNVLKPSKYKLPPGPKKLPIIGNLHQRRTLHPRNRRNLAEMYGPVALLQYGFVPVVAISSKEAAEEVLKINDLECCSRPEAAGMRATFYNFKDIGMAPFGDEWSLMRKLSVVELFSVKKLQSFKYIIEEENNLCVKKLSEFATRQSPVNLERAIFTLVGNIVCRIGYGINLYECDFFEADRVVDLVLKAEAVIRETVFSDFFPGRIGRFIDCISGQNRRLKNNFSVVDTFFQNVLNEHLKPGRESSTIVDLMIDMKKKQENDGDALKFTTDHLKGMISDIFVAGIGGVAGITLWGMTELIRNPRVMKKVQDEIRTTLGDKKERIKEEDLNQLHYFKLVVKETLRLHPTTPLLLPRQTMSHIKIQGYDVPAKTQILVNVYAMG…
AtCYP71B16	MAISLLCLFLITLVSLIFVVKKIKHSKWDLPPSPPTFPVIGNLHQVGELPHRSFQRLAERTGHVMLLHFGFVPVTVISSREAAEEVLRTHDLKCCTRPKLVGSRLISRGFKDISFTPYGEEWRERRKFLVRELFCFKKVQYFGYIVEEECNLLVKKLTESAVGRPPVDLSKSLFWLAASILFRIAFGQSFHDNKFIDEDKIDELIFETETAQASFTCSDFFPIAGLGWLADWISGKHRWLNNVFFKLDALFQRVIDDHSDPGRWKDHKDIVDVMLDVMHKQGKDDSLRLTIDHIKGFLTNIIIAGIDTGALTMIWAMTELARNPELMKNVQGEIRDSFGNNKERITKEDLNKVPFLNMVIKETFRLHPVAPLLLPRETMTHIKVQGYDIPPKRRILVNT…
AtCYP71B17	MAISLLCLFLITFVSLTIVGCKIKRSIWNLPPSPPKLPVIGNLHQVGELPHRSFRRLAERTGHVMLLHLGFVPVTVISSREAAEEVLRTHDLDCCSRPNLVGSRLISRGFKDLNFTPYGEEWKERRRFLVGELFCSKKLQSFIYIKEVECNFLVKKLSESAVDQSPVDLSKTLFWLAASILFRVAFGQSFHESEFTDTDKIDELVFETETAQGSFTCSDFFPIAGLGWLVDWISGQHKRLNDVFLKLDALLQHVIDDHSNPGRSKDHKDIVDVMLDVMHKQGKDDSLRLTIDHIKGLLTNIIIAGIDTGALTMIWTMTELARNPEIMKKVQGEIRDRLGNNRERITKEDLDKVPFLNLVIKETFRLHPVAPLLLPRETMAHVKVQGYDIPPKRRILVNA…
AtCYP71B18P	MAISLLLSFLIAFASLIFLGKKIKRSKWNFPPSPPKFPVIGNLHQLGELPHRSLQRLAEKTGDVMLIHLGFVPVTVISSKEAAEEVLRTHDLNCCSRPNLVGTRLLSRGFKDVGFTPYGEEWKERRKFLVREFFSLKKVQSFGYIREEECNFLVKKLLESAVDQSPVDLSKTLFWLTASVMFRVAFGQSFHESEFIDKDKVDELVFEAETAQASFTCSDFFPIAGLGWLVDCISGQHKRLKDVFFKLDALFQXLDVMQKQRKDDSLKLTINNIKGILTNIFLGGIDTGALTMIWAMTELARNPEVMKKVQGEIRDRLGRNKERITEEDINKVPYLNLVIKETFRLHHPVPLLLPRETMAHIKVQGYDIPPKRRILVNAWAIGRDPKLWTNPEEFNPERF…
AtCYP71B19	MAISFLCVFLITFVSLIFFAKKIKRSKWNLPPSPPKFPVIGNLHQIGELPHRSLQHLAERYGPVMLLHFGFVPITVVSSREAAEEVLRTHDLDCCSRPKLVGTRLLSRDFKDIGFTPYGNEWKARRKFALRELFCLKKVQSFRHIREEECNFLVKQLSESAVDRSPVDLSKSLFWLTASILFRVALGQNFHESDFIDKEKIEELVFEAETALASFTCSDFFPVAGLGWLVDWFSGQHKRLNDVFYKLDALFQHVIDDHLNPGRSKEHEDIIDSMLDVIHKQGEDSSLELTIDHIKGFLANIFLAGIDTGAITMIWAVTELVKNPKLIKKVQGDIREQLGSNKERITEEDIEKVPYLKMVIKETFRLHPAAPLILPRETMAHIKVQGYDIPPKRRILVNV…
AtCYP71B2	MTILLCFFLVSLLTIVSSIFLKQNKTSKFNLPPSPSSLPIIGNLHHLAGLPHRCFHKLSIKYGPLVFLRLGSVPVVVISSSEAAEAVLKTNDLECCSRPKTVGSGKLSYGFKDITFAPYGEYWREVRKLAVIELFSSKKVQSFRYIREEEVDFVVKKVSESALKQSPVDLSKTFFSLTASIICRVALGQNFNESGFVIDQDRIEELVTESAEALGTFTFSDFFPGGLGRFVDWLFQRHKKINKVFKELDAFYQHVIDDHLKPEGRKNQDIVTLILDMIDKQEDSDSFKLNMDNLKAIVMDVFLAGIDTSAVTMIWAMTELIRNPRVMKKAQESIRTTLGLKKERITEEDLGKVEYLNHILKETFRLHPALPFVVPRETMSHIKIQGYDIPPKTQIQLNV…
AtCYP71B20	MAISFLCFCLITLASLIFFAKKIKHLKWNLPPSPPKFPVIGNLHQIGELPHRSLQHLAERYGPVMLLHFGFVPVTVVSSREAAEEVLRTHDLDCCSRPKLVGTRLLSRNFKDVCFTPYGNEWKARRKFALRELFCLKKVQSFRHIREEECNFLVKQLSESAVNRSPVDLSKSLFWLTASIFFRVALGQNFHESNFIDKEKIEELVFEAETALASFTCSDFFPVAGLGWLVDWFSGQHKRLNDVFYKLDALFQHVIDDHLNPGRSKEHEDIIDSMLDAIHKEGKDSSLELIIDHIKGFLANIFLAGIDTGALTMIWAMTELVKNPKLIKKVQGEIREQLGSNKARITEEDIDKVPYLKMVIKETFRLHPAAPLILPRETMAHIKVQGYDIPPKRRILVNV…
AtCYP71B21	MSIFLCFLLLLPLFLVFYKRLLPSKGKLPPGPISLPIIGNLHQLGKSLHRSFYKLSQEYGPVMFLRFGVVPVVVFSTKEAAEEVLKTHDLETCTRPKLSATGLFTYNFKDIGFAQYGEDWREMRKLAMLELFSSKKLKAFRYIREEESELLVKKVTESAQTQTLVDLRKALFSYTASIVCRLAFGQNFHECDFVDMDKVEELVLESETNLGSFAFIDFFPAGLGWAIDRISGQHSRLHKAFARLSNFFQHVIDDHLKPWQSEDHSDIVGVMLDMINKESKVGSFKVTYDHLKGVMSDVFLAGVNAGAITMIWALTELTRHPRVMKKLQQEIRELLGDNKEKITEQDLEKVHYLKLVIQETFRLHPPAPLLLPRETMSDVKIQGYNIPKNTMIEINTYAI…
AtCYP71B22	MSISLYFLLLLPLFLIFFKKLSPSKGKLPPGPLGLPIIGNLHQLGKSLHRSFHKLSQNYGPVMFLHFGVVPVVVVSTREAAEEVLKTHDLETCTRPKLTATKLFSYNYKDIGFAQYGDDWREMRKLAMLELFSSKKLKAFRYIREEESEVLVNKLSKSAETRTMVDLRKALFSYTASIVCRLAFGQNFHECDFVDMDKVEDLVLESETNLGSFAFTDFFPAGLGWVIDRISGQHSELHKAFARLSNFFQHVIDDHLKPGQSQDHSDIIGVMLDMINKESKVGSFQVTYDHLKGVMSDVFLAGVNAGAITMIWAMTELARHPRVMKKLQQEIREILGDNKEKITEQDLEKVHYLKLVIEETFRLHPPAPLLLPRETMSDLKIQGYNIPKNTMIEINTYSI…
AtCYP71B23	MSIFLCFLLLLLLLLVTIIFTRKSQSSKLKLPPGPPKLPIIGNLHYLNGLPHKCLLNLWKIHGPVMQLQLGYVPLVVISSNQAAEEVLKTHDLDCCSRPETIASKTISYNFKDIGFAPYGEEWRALRKLAVIELFSLKKFNSFRYIREEENDLLVKKLSEASEKQSPVNLKKALFTLSASIVCRLAFGQNLHESEFIDEDSMEDLASRSEKIQAKFAFSNFFPGGWILDKITGQSKSLNEIFADLDGFFNQVLDDHLKPGRKVLETPDVVDVMIDMMNKQSQDGSFKLTTDHIKGIISDIFLAGVNTSATTILWAMTELIRNPRVMKKVQDEVRTVLGEKRDRITEQDLNQLNYFKLVIKETFRLHPAAPLLLPREAMAKIKIQGYDIPEKTQIMVNVY…
AtCYP71B24	MSILLYFIALLSLIIIKKIKDSNRNLPPSPLKLPVIGNLYQLRGLFHKCLHDLSKKHGPVLLLRLGFLDMVVISSTEAAEEALKVHDLECCTRPITNVTSKLWRDGQDIGLAPYGESLRELRKLSFLKFFSTTKVRSFRYIREEENDLMVKKLKEAALKKSSVDLSQTLFGLVGSIIFRSAFGQRFDEGNHVNAEKIEDLMFEVQKLGALSNSDLFPGGLGWFVDFVSGHNKKLHKVFVEVDTLLNHIIDDHLKNSIEEITHDRPDIIDSLLDMIRKQEQGDSFKLTIDNLKGIIQDIYLAGVDTSAITMIWAMAELVKNPRVMKKVQDEIRTCIGIKQNEKIEEDDVDKLQYLKLVVKETLRLHPAAPLLLPRETMSQIKIQGYNIPSKTILLVNVWS…
AtCYP71B25	MAILQSFLLLLSLPFLFTLIYTKKMKESKRNLPPGPAKLPIVGNLHQLQGMVHRCLHELSKKHGPVMHLQLGFVPLVLISSSEAAEEALKTHDIECCTRPNTNAARVFSRNNKNIGLGAYSDEWRELRKVAVREYFSVKKVQSFRYVREEENHLMVKKLRDLALKQSPVDLSKTLFCLAASTVFRPVFGQSFSDNKHFSEEKIEELVFEAQKSLTFKFSDLFPIPGLGWFIGFVSGQHKGLHKVFIEVDNFLNHMIDDHQKQNQPQDRSDIVGSLLDMIHNQEQDKSFKLTIDHLKGITQDIFLAGIDTSAITMIWAMAELVNNPRVMKKVQDEIRSCIGIKKERIEEEDVGKLQYLKLVIKETLRLHPAAPLLLPRETMADIKIQGYDIPRKTLLLVS…
AtCYP71B26	MDSIWILSLLFFIIFLLLAAFKRKNHGKHRRIPSPPGFPIIGNLHQLGELQHQSLWKLSKKYGPVMLLKLGKVPTLILSSSETAKQALRDYDLHCCSRPSLAGGRELSYNNLDMSSSPYNEYWKELRKLCSQELFSANKIQSIQPIKDEEVKKVIDSIAESSSLKNPVNLSKTFLALTTSVVCKAAFGVSFEGSVLNSDRFNKLVRDTFEMLGSFSASDFIPYVGWIIDKFNGLQGWRKKSFRDLDAFYEQIFDLHKEEKEVGSEDLVDVLLRLEKEEIVVGNGKLTRNHIKAILMNILLGGIDTSAITMTWAMAELAKNPRVMKKVQAEIRNQIKNKERISFDDTDKLEYLKMVIKETWRLHPPTPLLLPRDVITEFEINGYTIPAKTRLHVNVWAIG…
AtCYP71B27	MAILFCFFLVSLVTLVSSIFFKQIKNTKFNLPPSPPSLPIIGNLHHLTGLPHRCYHKLSIKYGPVILLHLGFVPVVVISLSEAAEAVLKTHDLECCSRPKTVGTGKLSYGFKDISFVPYSEYWREMRKLAVTELFSLKKVQSYRYIRGEEIEFMVKKLSESALKQSPVDLTFFSLTASIIFRVALGRNFHESGSIIDQEGIEELVTAATTAIGSFTFSDFFPSGLGRFLDCLFRTQTNINKVSEKLDAFYQHVIDDHLKPSTLDSSGDIVALMLDMIKKKGHKDDFKLNVDNIKAVLMNIFLAGIDTGAITMIWAMTELVKKPLVMKRAQENIRGVLGLKRDRITEEDLCKFDCLKHIVKETLRLHPPVPFLVPRETISHIKIQGYDIPPKTQIQVNVW…
AtCYP71B28	MSVFLCFLCLLPLILIFLKNLKPSKWKLPPGPKKLPIIGNLHQRRELHPRNSRNLSEKYGPIVFLRYGFVPVVVISSKEAAEEVLKTHDLECCSRPETVGTRAISYNFKDIGFAPYGEDWRTMRKLSVVELFSSKKLQSFRYIREEENDLCVKKLSDLASRRSLVNLEKTLFTLVGSIVCRIGFGINLRECEFVDEDSIDDLVHKSEDVIRNSIFSDFFPGLMGRLIEWIFSERKRLNRLYSEVDTFFQNILDDHLKPGRESSDIIDVMIDMMKKQEKEGDSFKFTTDHLKGMISDIFLAGVGTSSTTLIWAMTELIRNPRVMKKVQDEIRTTLGDKKERITEEDLNQLHYFKLMVKEIFRLHPAAPLLLPRETLSHVKIQGYDIPAKTQIMINAYAIA…
AtCYP71B29	MAIILCFLILLPLILIFLKKLKHSKWKLPPGPPKLPFIGNLHQLQELPPRNLNHKYGPVILLRFGFVPLVVISSKEAAEEVLKIHDLECCSRPETAGTRKISYNFKDIGFAPYGEEWKAMRKLSVVELFTAKKHQYFRSIREEENDLLVKKLTELALTRSPVNLKKTLFTLVGSIVCRIGFGFNLHECEFIDENSISDLVDKSEILEMTSMFSDFFPGGIGRFIDWISGQNKRFDNVFSDLDTFFQNILDYHLKPGRKVADSSDIIDVVINMIKKQEKDGDSFKLTTDHLKGMISDIFLAGVSTSASTLIWAITELVRNRKVMKKVQEEIRTTLGDKKERITEQDLTNLHYFKLVVKEIFRLHPAVPFLLPRETLSHVKIQGYDIPAKTQIMINVYAIA…
AtCYP71B3	MSILLYFFFLPVILSLIFMKKFKDSKRNLPPSPPKLPIIGNLHQLRGLFHRCLHDLSKKHGPVLLLRLGFIDMVVISSQETTEEVLKVHDLECCTRPKTNASSKFSRDGKDIAFAPYGEVSRELRKLSLINFFSTQKVRSFRYIREEENDLMVKKLKESAKKKNTVDLSQTLFYLVGSIIFRATFGQRLDQNKHVNKEKIEELMFEVQKVGSLSSSDIFPAGVGWFMDFVSGRHKTLHKVFVEVDTLLNHVIDGHLKNPEDKTNQDRPDIIDSILETIYKQEQDESFKLTIDHLKGIIQNIYLAGVDTSAITMIWAMAELVKNPRVMKKAQEEIRTCIGIKQKERIEEEDVDKLQYLKLVIKETLRLHPPAPLLLPRETMADIKIQGYDIPRKTILLVN…
AtCYP71B30P	MFFYLYLSSSAKEVLKTHDLETCTRPKMVTTGLFSYNFKDIGFTQYGEEWGEMKKLIGLELFSPKTQKSFRYIREEESDLLVKKISKSAQTQTLVDLGKPLFSFTAGIIFRLAFGQNFRKCDFIDRERVEELVVESETNVGTLAFSDFFPTGLGWLIDRLSGQSSRMNKVFSKLTNLFEHVIDDHLKTEQHQDHSNLISAMLNMINKPTNIGSFKITSDHLKGVMSVSVYDFLTGTLIRATLGSNKERITEEDLEKVEYLKMVIEETFRLHPPAPLLLPRLTMSDVTIQGYNIPKNTMIEINTYTIGRDPKCWTNPEEFIPERFSNTSINYKGQHFELLPFGAGRRSCPGMSLGITILELGLLNLLYFFDWRLPNGMTIADIDMEEVGALNIAKKVPLE…
AtCYP71B31	MSMFLGLLFLFPLFFILFKNLLPPRKKLPPGPTGLPLIGNLHQLGRLLHSSLHKLSLEHGPVMLVRWGVVPMAVFSSNEAAKEVLKTHDLETCNRPKLVANGLFTHGYKDIGFTQYGEEWREMKKFVGLELFSPKKHKSFRYIREEEGDLLVKKISNYAQTQTLVDLRKSLFSYTASIIFREAFGQNFRECDYINMDKLEELVQETETNVCSLAFTDFFPRGLGWLVDRISGQHSRMNIAFSKLTTFFEDVIDELLKTKQLDDHSDLVTAMLDVINRPRKFGSLKITYDHLIAMMSDVVLAGVNAGTVTMIWTMTELTRHPRVMKKLQEEIRATLGPNKERITEEDLEKVEYLNLVIKESFRLHPPAPLLLPRETMSDIEIQGYHIPKNAHVKINTYAI…
AtCYP71B32	MSIFLLCILFLFPLFQIIFKKLLPSKSKLPPGPTGLPIIGNLHQLGRSLHSVFHKLSLXYGPVMLLRFGVVPVVVFSSKEAAKEVLKTHDLDTCTRPKLVANGLFSRNFKDIGFTQYGEDWREMKKLVGLELFSPKKHKSFRYIREEEGDLLVKKISNSAQTQTLIDLRKASFSFTAGTIFRLAFGQNFHQCDFMDMDRLEELVLEAETNGCILALTDFLPTGLGWLVDRISGRHSRMNKAFSKLTNLFQHVIHEQLKIGQLQDHSNLVSAMLDMIIRPSKFSSFNITSNHLIAMMSDVVLAGVNAGTITMVWIVTELIRHPRVMRKLQEEIRATLGSNKERITXEDLQKVEYLNMVIKETFRLHPPSPLLLPRETMSDIEIQGYHIPKNALIRINTYT…
AtCYP71B33	MVNILILSLLFLVILLLLTAFKRAKRRQHRPIPSPPGFPIIGNLHQLGELPHQSLWKLSKKYGPVMLLNLGKVPTVILSSSETAKQALRDYDLHCCSRPSLAGGRELSYNNRDISFSPYNDYWKELRKLCTQELFSAKNIHSTQHIKDEEVKKLIVSIAESASLKTPINLNKKCLALTVSIVCRIAFGVSFEGTVLSNDSFNKLIREAFEMLGSFSASDFIPYIGWIIDRFTGLQGRREKSVXDLDAFYEQIIDLHKEEKEVGSEDFVDLLLKLEKEETVVGNNNFTRNNVKAILMDILLAGIETSAGTMAWTMAELAKNPLVMRKVQSEIRNKFENRELISFEDIEQLHYLKTVIKETWRLHPPAPLLLPREVMSEFEINGYTMQPKTQIHVNVWAIG…
AtCYP71B34	MTNIWLLSLIFVICILVAVFNHKNRRNYQRTPPSPPGCPIIGNLHQLGELPHQSLWKLSKKYGPVMLLKLGRVPTVIVSSSETAKQALKIHDLHCCSRPGFAGARELSYNYLDIAFSPYDDYWKEVRKLAVQELFSSKQVHSIQPIKDEEVKKLIDSISESAAQKTPINLNKTLLALTVSVVCRTAFSVNFEGTVLNSERFNNIVREALEMLGSFSASDFIPYVGRIIDLLTGLQGRRERSMRDLDAFYEQMFDLHKQKKEEGSEDFVDLLLRLEKEEAVLGNDKLTRNHIKAILMDVLLAGMDTSAITMTWAMAELAKNPRVMKKVQSEIRSQIKNKERISFDDTDKLEYLKMVIKETWRLHPTTPLLIPREAMSEFEINGYTIPVKTRLHVNVWAIG…
AtCYP71B35	MAHIWLLPLIFLVCILLAVFNHKKHPKYRQFPCPPGFPIIGNLHQIGELPHQTLWKLSKKYGPVMHLMLGRVPTVVVSSSDTARQVLRVHDLHCCTRPSLSGPRELSYNYLDIAFSPYDDYWKEVRKLCVQELFSTKQVHSIQPIKDEEVKKMIDSIAESASQKNPVNLNNKCLELTVSVVCRTAFGVSFEGTVLNSDRFNKIVREALEMLGSFSAADFIPYVGWIIDVLTGLQGRRERSKRDLNAFFEQMFDLHKEGKKEGNEDFVDLLLRLEKEEAVLGNDKLTRNHIKAILLDVLLAGIDTSAITMTWAMTELARNPRVMKKVQSEIRTQMGNRSMISFEDMDQLEYLKMVIKETWRLHPTTPLLLPREAMSEFDINGYTIPVKTRLHVNVWAIGR…
AtCYP71B36	MATILFLSLLFLSCILLAAFTHKKRQQHQRKPPSPPGFPIIGNLHQLGELPHQSLWRLSKKYGHVMLLKFGSIPTVVVSSSETAKQVLKIHDLHCCSRPSLAGPRALSYNYLDIAFSPFDDYWKELRRICVQELFSVKRVQSFQPIKEDEVKKLIDSVSESASQGTPVNLSEKFTSLTVRVTCKATFGVNFQGTVLNSDRFEKLIHDTYLFLGSFSASDYFPNGGWIIDWLTGLHGQRERSVRALDAFYEQMFDLHKQGNKEGVEDFVDLLLRLEKEETVIGYGKLTRNHIKAILMNVLIGGIGTSAITMTWAMTELMRNPRVMKKVQSEIRNQIGKKSMITLDDIDQLHYLKMVINETWRLHPPSPFLIPRQVMSEFELNDYVIPVKTRLYVNVWAIG…
AtCYP71B37	MATIWFLPLLFLSCLLLAALRLKKRRQHQRKPPSPPGFPIIGNLHQLGELPHQSLWSLSKKYGPVMLLKFGSIPTVVVSSSETAKQALKIHDLNCCSRPSLAGPRALSYNYLDIVFSPFNDYWKELRRMCVQELFSPKQVHLIQPIREEEVKKLMNSFSESAAQKTPVNLSEKLASLTVGVICKAAFGVSFQGTVLNSDNFDKLIHDAFLFLGSFSASDYFPNVGWIIDWLTGLQGQRERSVRGLDAFYEQMFDLHKQGNKEGVEDFVDLLLKLEKEETVLGYGKLTRNHIKAVLMNVLLGGIGTSAITMTWAMTELMRNPRVMKKVQSEIRNQIGGKSMICLDDIDQLHYLKMVINETWRLHPPAPLLVPREVMSEFEINGYTIPAKTRLYVNVWGIG…
AtCYP71B38P	MSIFLCFLLLLPLSLILFKKLLPSKGKLPPGPIGLPIIGNLHQLGKLLYKSFHKISQEYGPVVLLRLGVVPVIVVSSKEGAEEVLKTHDLETCTRPKTAATGLFTYNFKDIGFAPFGDDWREMRKITTLELFSVKKLKSFRYIREEESELLVKKISKSVDETQNSSVDLRKVLFSFTASIICRLAFGQNFHQCDFVDMEKVEELVLESEANLGTFAFADFFPGGWLIDRISGQHSRVNKAFYKLTNFYKHVIDDHLKTGQPQDHSDIVSVMLDMINKPTKADSFKVTYDHLKGVMSDIFLAGVNGGANTMIWTLTELSRHPRVMKKLQEEIRAMLGPNKERITEEDLEKVEYLKLVMVETFRLHPPAPLLLPRLTMSDIKIQGYNIPKNTMIQINTYAI…
AtCYP71B4	MVSLLSFFLLLLVPIFFLLIFTKKIKESKQNLPPGPAKLPIIGNLHQLQGLLHKCLHDLSKKHGPVMHLRLGFAPMVVISSSEAAEEALKTHDLECCSRPITMASRVFSRNGKDIGFGVYGDEWRELRKLSVREFFSVKKVQSFKYIREEENDLMIKKLKELASKQSPVDLSKILFGLTASIIFRTAFGQSFFDNKHVDQESIKELMFESLSNMTFRFSDFFPTAGLKWFIGFVSGQHKRLYNVFNRVDTFFNHIVDDHHSKKATQDRPDMVDAILDMIDNEQQYASFKLTVDHLKGVLSNIYHAGIDTSAITLIWAMAELVRNPRVMKKAQDEIRTCIGIKQEGRIMEEDLDKLQYLKLVVKETLRLHPAAPLLLPRETMADIKIQGYDIPQKRALLV…
AtCYP71B5	MSIFLCFLLLLPLSLIFLKKLLPSKGKLPPGPKGLPIIGNLHQFGRFLHKSLHKISQEYGPVMLLHFGVVPVIIVSSKEGAEEVLKTHDLETCSRPKTVGSGLFTYNFKDIGFAPYGENWREMRKIAVSELFSQKKLKSFRYIREDESQLLVRKVSKSALETPTSSVNLRKVIFTFAASIICRLSFGQNFCDFVDMETVEELVLESETNLGSLAFADFLPAGWIIDRISGQHSTVMKAFSKLTNFFELVIDDHLKSGKIEDHSDIISVMLDMINKPTEVGSYKVTDDHLKGLMSDVFLAGVNAGSITMIWTMTELSRHPRVMRKLQEEIRAALGPNKEKITEEDLEKVEYLKMVIEEAFRLHPPAPLLLPRLTMSDINIQGYSIPKNTMIQINTYTIGR…
AtCYP71B6	MSLFSFPISTELLPWLLLLLIPPLLIFFLLRSPKNLPPGPPRLPILGNIHQLGSLPHRSLRDLSLKYGPVITVYLGSVRTVVVHSPETAEEVLKLHDSECCTRPKLSITKSFFYDGLGLGFTKWGDYYRDVRKLCVLELFSVKRANSFRNIREEELSRLVNSFSDSASSGSSVDLTANLAKFVASFTCRMAFGLSFQGSGMDNETFLELFTEANRVIGKFAAADIFPGFGWILDRISGLDSSRRKSFQDLDTFYQKAIVDHREKKKTEDREDLIDVLLKLQSQETKLGSSRITDTHIRAIIMDLFVAGVDTSVITLDWTMAELSRHPRVMKKVQAEIREHVGDKGIVTYDDLEALVYMKMVIKETWRLHAPSPILIPREAMTNFKIKGYDIYPGTRIHV…
AtCYP71B7	MSILLCFLCLLPVFLVSLSILSKRLKPSKWKLPPGPKTLPIIGNLHNLTGLPHTCFRNLSQKFGPVMLLHFGFVPVVVISSKEGAEEALKTQDLECCSRPETVATRMISYNFKDIGFAPYGEEWKALRKLVVMELLNTKKFQSFRYIREEENDLLIKKLTESALKKSPVNLKKTLFTLVASIVCRLAFGVNIHKCEFVDEDNVADLVNKFEMLVAGVAFTDFFPGVGWLVDRISGQNKTLNNVFSELDTFFQNVLDDHIKPGRQVSENPDVVDVMLDLMKKQEKDGESFKLTTDHLKGIISDIFLAGVNTSAVTLNWAMAELIRNPRVMKKVQDEIRTTLGDKKQRITEQDLSQVHYFKLVVKEIFRLHPAAPLLLPRETMSHVKIQGYDIPVKTQMMI…
AtCYP71B8	MIKSILLCFFFLFPLLLTLFKKLLPSKWKLPPGPTGLPIIGNLHQLGRLLHSSFHKLSLEHGPVMLLRFGVVPMVVISSKEAAKQVLKSRDLETCSRPKLVANGLFTRNFKDIAFAQYGEDWREMKKLVGLELFNPKKHKFFRYIREEEGDLLVKKLSKSSQTQTLVDLRKAFFSFTAGIIFRVSFGQNFRECDFIDMDRLEELVQESETNVFSFAFTDFFPTGLGWLVDRISGQHSRIEKAFSKLTKFFQHVIDEELKIGQSQDHSNLVSSMLDMINRSTEYGSFKITSDHLIAMMTDIVLGGVNAGTITMIWTMTELTRHPRVMKKLREEIRATLGPNKERITEEDLEKVEYLKLVIKETFRLHPPGPFLLPRQVMSDIEIQGYHIPKNAHIKISTY…
AtCYP71B9	MATIWFLSLLFLCCILLAAFKHKKRRTNQQQPPSPPGFPIIGNLHQLGELPHQSLWSLSKTYGPVMLLKLGSVPTVVVSSSETAKQVLKINDLHCCSRPSLAGAKELSYNYLDIAFSPFDDYWKELRRICVQELFSAKRVHSIQPIKEEEVRKLIVSATESASQKSPVNLSEKFLDLTVSVICKAAFSLDFHTSVLNNDGFDKLIHDAFLFLGSFSASNFFPNGGWIIDWLTGLQRRREKSVKDLDVFYQQMFDLHKQENKQGVEDFVDLLLKLEKEETVLGYGKLTRNHVKAILMNVLLGAINTSAMTMTWAMAELIRNPRVMKKVQSEIRNQMINKSVITLDDIDHLPYLKMVIKETWRLHPPVPLLLPREVMSEFEINGYKIQPKTLLYVNVWAIG…
AtCYP720A1	MAESAGESYRLLSVSSSTTFLAFIIIFLLAGIARRKRRAPHRLPPGSRGWPLIGDTFAWLNAVAGSHPSSFVEKQIKKYGRIFSCSLFGKWAVVSADPDFNRFIMQNEGKLFQSSYPKSFRDLVGKDGVITVHGDQQRRLHSIASSMMRHDQLKTHFLEVIPVVMLQTLSNFKDGEVVLLQDICRKVAIHLMVNQLLGVSSESEVDEMSQLFSDFVDGCLSVPIDLPGFTYNKAMKARKEIIRKINKTIEKRLQNKAASDTAGNGVLGRLLEEESLPNESMADFIINLLFAGNETTSKTMLFAVYFLTHCPKAMTQLLEEHDRLAGGMLTWQDYKTMDFTQCVIDETLRLGGIAIWLMREAKEDVSYQDYVIPKGCFVVPFLSAVHLDESYYKESLSFN…
AtCYP721A1	MAVFFILVLVFFFLVFRFIYSNIWVPWRIQSHFKKQSVTGPSYRIFSGNSGEVSRLTAEAKSKPIPSGRNPHEFVHRVAPHYHEWSRVYGKTFLYWFGSKPVVATSDPRLIREALTTGGSFDRIGHNPLSKLLYAQGLPGLRGDQWAFHRRIAKQAFTMEKLKRWVPQMVTSTMMLMEKWEDMRNGGEEIELEVHKEMHNLSAEMLSRTAFGNSVEEGKGIFELQERMMRLFYLVRWSVYIPGFRFFPSKTNREIWRIEKQIRVSILKLIENNKTAVEKSGTLLQAFMSPYTNQNGQEEKLGIEEVTDECKTFYFAAKETTANLMTFVLVLLAMNQEWQNIAREEVICVLGQTGLPTLDILQDLKTLSMIINETLRLYPPAMTLNRDTLKRAKLGDLDI…
AtCYP722A1	MEHLCLCLVLCAAMLTLGKFLKIMFQDRKKSTAGVPPGSDGFPVIGETLQFMLSVNSGKGFYEFVRSRRIRYGSCFRTSLFGETHVFLSTTESARLVLNNDSGMFTKRYIKSIGELVGDRSLLCAPQHHHKILRSRLINLFSKRSTALMVRHFDELVVDALGGWEHRGTVVLLTDLLQITFKAMCKMLVSLEKEEELGSMQRDVGFVCEAMLAFPLNLPWTRFHKGIMARGRVMEMLEKIIRERRNEINSHNNHHEDFLQQLLAVDNDTPQLTDAEIKDNILTMIIAGQDTTASALTWMVKYLGENQKVLDILIEEQSQITKKASNKPFLELEDLSEMPYASKMVKESLRMASVVPWFPRLVLQDCEMEGYKIKKGWNINIDARSIHLDPTVYSEPHKF…
AtCYP724A1	MLVLSIFLSLGLFFLSILILYISISKKNETNDHHSSLTGSMGWPFIGETISFFKPHRSDSIGTFLQQRVSRYGKVFKSNICGGKAVVSCDQELNMFILQNEGKLFTSDYPKAMHDILGKYSLLLATGEIHRKLKNVIISFINLTKSKPDFLHCAENLSISILKSWKNCREVEFHKEVKIFTLSVMVNQLLSIKPEDPARLYVLQDFLSYMKGFISLPIPLPGTGYTNAIKARKRLSARVMGMIKEREREEEDMNNAIREEDFLDSIISNEDLNYEEKVSIVLDILLGGFETSATTLSLVVYFLAKSPNLLHKLKEEHAAIRAKKGDGELLNWEDYQKMEFTQCVISEALRCGNIVKTVHRKATHDIKFNEYVIPKGWKVFPIFTAVHLDPSLHENPFEF…
AtCYP72A10	MEISVACVTVSVVVVVVSWWVWRTLQWVWFKPKMLESYLRRQGLAGTPYTPLIGDLKRNVNMLTEATSKPIKLTEDITPRVLPHPFQMLKTHGRTFFTWLGPKPTITIMDPELIKEVFNKVYDYPKAQTFLLGRLIATGIINYDGDKWAKHRRIINPAFHIEKIKNMVPAFHQSCSDVVGEWSKLVSDKGSSSCEVDVWPWLVSMTGDVISRTAFGSSYKEGQRIFELQAELVHLILQAFWKVYIPGYRYLPTKSNRRMKAAAREIQVILKGIVNKRLRAREAGKAAPNDDLLGILLESNLGQAKGNGMSTEDVMEECKLFYFAGQETTSVLLVWAMVLLSHHQDWQARAREEVKQVFGDKEPDTECLSQLKVMTMILYEVLRLYPPVTHLTRAIDKEM…
AtCYP72A11	MEISVASVTVSVAVVVVSWWVWRTLQWVWFKPKMLESYLRRQGLAGTPYTPLVGDLKKNFSMRAEARSKPINLTDDITPRIVPYPLQMLKTHGRTFFTWFGAIPTITIMDPEQITEVLNKVYDFQKAHTFPLGRLIATGVLSYDGDKWAKHRRIINPAFHLEKIKNMVPAFHQSCSEIVCKWDKLVSDKESSCEVDVWPGLVSMTADVISRTAFGSSCVEGQRIFELQAELAQLIIQTVRKAFIPGYSYLPTKGNRRMKAKAREIQVILRGIVNKRLRAREAGEAPNDDLLGILLESNLGQTKGNGMSTEDLMEECKLFYFVGQETTSVLLVWTMVLLSQHQDWQARAREEVKQVFGDKEPDAEGLNQLKVMTMILYEVLRLYPPIPQLSRAIHKEMEL…
AtCYP72A13	MEISVASVTVSVAVVVVSWWVWRTLQRVWLKPKMLESYLRRQGLAGTPYTPLVGDLKRNFSMLAEARSKPINLTDDITPRIVPYPLQMLKTHGRTFFTWFGPIPTITIMDPEQIKEVFNKVYDFQKAHTFPLGRLIAAGLVSYDGDKWTKHRRIINPAFHLEKIKNMVPAFHQSCSEIVGEWDKLVTDKQSSCEVDIWPWLVSMTADVISRTAFGSSYKEGQRIFELQAELAQLIIQAFRKAIIPGYRYFPTKGNRRMKAAAREIKFILRGIVNKRLRAREAGEAPSDDLLGILLESNLGQTKGNGMSTEELMEECKLFYFAGQETTTVLLVWTMVLLSQHQDWQARAREEVKQVFGDKEPDAEGLNQLKVMTMILYEVLRLYPPVVQLTRAIHKEMQL…
AtCYP72A14	MEISVSSVTFSLAVVVVSWWVWRTLKWVWFTPKMLERSLRRQGLSGTSYTPLIGDFKKMISMFIEATSKPIKPTDDITPRVMPHPLQMLKTHGRTNLTWFGPIPTITIMDPEQIKEVFNKVYDFQKAHTFPLSKILGTGLVSYDGDKWAQHRRIINPAFHLEKIKNMVHVFHESCSELVGEWDKLVSDKGSSCEVDVWPGLTSMTADVISRTAFGSSYREGHRIFELQAELAQLVMQAFQKFFIPGYIYLPTKGNRRMKTAAREIQDILRGIINKRERARESGEAPSEDLLGILLESNLGQTEGNGMSTEDMMEECKLFYLAGQETTSVLLVWTMVLLSQHQDWQARAREEVKQVFGDKQPDTEGLNQLKVMTMILYEVLRLYPPVVQLTRAIHKEMKL…
AtCYP72A15	MEISVASVTISVVLAVVSWWIWRTLQWVWFKPKMLEHYLRRQGLAGTPYTPLVGDLKKNFTMLSEARSKPLKLTDDISPRVVPYPLQMFKTYGRTYFTWFGPIPTITIMDPEQIKEVFNKVYDFQKPHTFPLATIIAKGLANYDGDKWAKHRRIINPAFHIEKIKNMVPAFHQSCREVVGEWDQLVSDKGSSCEVDVWPGLVSMTADVISRTAFGSSYKEGQRIFELQAELAQLIIQAFRKAFIPGYSYLPTKSNRRMKAAAREIQVILRGIVNKRLRAREAGEAPSDDLLGILLESNLRQTEGNGMSTEDLMEECKLFYFAGQETTSVLLVWTMVLLSQHQDWQARAREEVKQVFGDKEPDAEGLNQLKVMTMILYEVLRLYPPVTQLTRAIHKELKL…
AtCYP72A7	MSFSVVAALPVLVAVVVLWTWRIVKWVWIKPKMLESSLKRQGLTGTPYTPLVGDIKRNVDMMMEARSKPINVTDDITPRLLPLALKMLNSHGKTFFIWIGPLPTIVITNPEQIKEVFNKVNDFEKASTFPLIRLLAGGLASYKGDKWASHRRIINPAFHLEKIKNMIPAFYHCCSEVVCQWEKLFTDKESPLEVDVWPWLVNMTADVISHTAFGSSYKEGQRIFQLQGELAELIAQAFKKSYIPGSRFYPTKSNRRMKAIDREVDVILRGIVSKREKAREAGEPANDDLLGILLESNSEESQGNGMSVEDVMKECKLFYFAGQETTSVLLVWTMVLLSHHQDWQARAREEVMQVLGENNKPDMESLNNLKVMTMIFNEVLRLYPPVAQLKRVVNKEMKL…
AtCYP72A8	MSDTKISAVAVAAAVVVVTTVTVWIWKGLNVAWLRPKKNEAYLKRQGLSGTPFTFLVGDIKREASMVEQEKSRPINLTDDYTHRVMPLIQQTVKDHGKTSYMWMGPIASVIVTKPEHIKDVLNRVYDFPKPPVHPIVELFATGVALYEGEKWSKHRKIINPSFHLEKLKIMIPAFYESCSEMISKWEKLVTEQGSSNEIDVWPYLGDLTSDVISRTAFGSSYEEGKRIFELQEEQGRRVLKALELAFIPGMRFLPTKNNLRMRQINKEVKSRLREIIMKRQRGMDTGEAPKNDLLGILLESNSGDHGMSIEDVVEECRLFHFAGQETTAVLLVWTMIMLSHHQKWQDQAREEILKVIGKNNKPNFDALSRLKTMSMILNEVLRLYPPGILLGRTVEKET…
AtCYP72A9	MEIVIASLALVVVLWCIWRILEWVWLKPKMLESYLRRQGLVGTRYTPLVGDVRRSFSMLKEARSKPMKPTDDLISLVMPYSFHMLNTYGKTFFTWSGPIPAITIMNPQLIKEVYNKFYDFEKTHTFPLTSLLTDGLANADGDKWVKHRKIINPAFHFEKIKNMVPTFYKSCIEVMCEWEKLVSDKGSSCELDVWPWIVNMTGDVISRTAFGSSYKEGQRIFILQAELAHLIILALGKNYIPAYRHFPTKNNRRMKTIVKEIQVILRGIISHREKARDAGEAPSDDLLGILLKSNSEQSKGNGLNMEEIMEECKLFYFAGQETTSVLLAWTMVLLSQHQDWQARAREEVMQVFGHNKPDLQGINQLKVMTMIIYEVLRLYPPVIQMNRATHKEIKLGDMT…
AtCYP72C1	MLEIITVRKVFLIGFLILILNWVWRAVNWVWLRPKRLEKYLKKQGFSGNSYRILMGDMRESNQMDQVAHSLPLPLDADFLPRMMPFLHHTVLKHGKKCFTWYGPYPNVIVMDPETLREIMSKHELFPKPKIGSHNHVFLSGLLNHEGPKWSKHRSILNPAFRIDNLKSILPAFNSSCKEMLEEWERLASAKGTMELDSWTHCHDLTRNMLARASFGDSYKDGIKIFEIQQEQIDLGLLAIRAVYIPGSKFLPTKFNRRLRETERDMRAMFKAMIETKEEEIKRGRGTDKNSDLLFSMLASNTKTIKEQGPDSGLSLDDLIDDCKAFYLAGQNVTSSLFVWTLVALSQHQDWQNKARDEISQAFGNNEPDFEGLSHLKVVTMILHEVLRLYSPAYFTCRI…
AtCYP734A1	MEEESSSWFIPKVLVLSVILSLVIVKGMSLLWWRPRKIEEHFSKQGIRGPPYHFFIGNVKELVGMMLKASSHPMPFSHNILPRVLSFYHHWRKIYGATFLVWFGPTFRLTVADPDLIREIFSKSEFYEKNEAHPLVKQLEGDGLLSLKGEKWAHHRKIISPTFHMENLKLLVPVVLKSVTDMVDKWSDKLSENGEVEVDVYEWFQILTEDVISRTAFGSSYEDGRAVFRLQAQQMLLCAEAFQKVFIPGYRFFPTRGNLKSWKLDKEIRKSLLKLIERRRQNAIDGEGEECKEPAAKDLLGLMIQAKNVTVQDIVEECKSFFFAGKQTTSNLLTWTTILLSMHPEWQAKARDEVLRVCGSRDVPTKDHVVKLKTLSMILNESLRLYPPIVATIRRAKSD…
AtCYP735A1	MLLTILKSLLVIFVTTILRVLYDTISCYWLTPRRIKKIMEQQGVTGPKPRPLTGNILEISAMVSQSASKDCDSIHHDIVGRLLPHYVAWSKQYGKRFIVWNGTDPRLCLTETELIKELLMKHNGVSGRSWLQQQGTKNFIGRGLLMANGQDWHHQRHLAAPAFTGERLKGYARHMVECTSKLVERLRKEVGEGANEVEIGEEMHKLTADIISRTKFGSSFEKGKELFNHLTVLQRRCAQATRHLCFPGSRFLPSKYNREIKSLKKEVERLLIEIIQSRRDCAEMGRSSTHGDDLLGLLLNEMDIDKNNNNNNNNLQLIMDECKTFFFAGHETTALLLTWTTMLLADNPTWQEKVREEVREVFGRNGLPSVDQLSKLTSLSKVINESLRLYPPATLLPRM…
AtCYP735A2	MMVTLVLKYVLVIVMTLILRVLYDSICCYFLTPRRIKKFMERQGITGPKPRLLTGNIIDISKMLSHSASNDCSSIHHNIVPRLLPHYVSWSKQYGKRFIMWNGTEPRLCLTETEMIKELLTKHNPVTGKSWLQQQGTKGFIGRGLLMANGEAWHHQRHMAAPAFTRDRLKGYAKHMVECTKMMAERLRKEVGEEVEIGEEMRRLTADIISRTEFGSSCDKGKELFSLLTVLQRLCAQATRHLCFPGSRFLPSKYNREIKSLKTEVERLLMEIIDSRKDSVEIGRSSSYGDDLLGLLLNQMDSNKNNLNVQMIMDECKTFFFTGHETTSLLLTWTLMLLAHNPTWQDNVRDEVRQVCGQDGVPSVEQLSSLTSLNKVINESLRLYPPATLLPRMAFEDIK…
AtCYP73A5	MDLLLLEKSLIAVFVAVILATVISKLRGKKLKLPPGPIPIPIFGNWLQVGDDLNHRNLVDYAKKFGDLFLLRMGQRNLVVVSSPDLTKEVLHTQGVEFGSRTRNVVFDIFTGKGQDMVFTVYGEHWRKMRRIMTVPFFTNKVVQQNREGWEFEAASVVEDVKKNPDSATKGIVLRKRLQLMMYNNMFRIMFDRRFESEDDPLFLRLKALNGERSRLAQSFEYNYGDFIPILRPFLRGYLKICQDVKDRRIALFKKYFVDERKQIASSKPTGSEGLKCAIDHILEAEQKGEINEDNVLYIVENINVAAIETTLWSIEWGIAELVNHPEIQSKLRNELDTVLGPGVQVTEPDLHKLPYLQAVVKETLRLRMAIPLLVPHMNLHDAKLAGYDIPAESKILVN…
AtCYP74A	MASISTPFPISLHPKTVRSKPLKFRVLTRPIKASGSETPDLTVATRTGSKDLPIRNIPGNYGLPIVGPIKDRWDYFYDQGAEEFFKSRIRKYNSTVYRVNMPPGAFIAENPQVVALLDGKSFPVLFDVDKVEKKDLFTGTYMPSTELTGGYRILSYLDPSEPKHEKLKNLLFFLLKSSRNRIFPEFQATYSELFDSLEKEAFPLRESGFRRFQRRNRLLFLGSSFLRDESRRYKLKADAPGLITKWVLFNLHPLLSIGLPRVIEEPLIHTFSLPPALVKSDYQRLYEFLRIRGEILVEADKLGISREEATHNLLFATSFNTWGGMKILFPNMVKRIGPGGHQVHNRLAEEIRSVIKSNGGELTMGAIEKMELTKSVVYECLRFEPPVTAQYGRAKKDLV…
AtCYP74B2	MLLRTMAATSPRPPPSTSLTSQQPPSPPSQLPLRTMPGSYGWPLVGPLSDRLDFQGPDKFFRTRAEKYKSTVFRTNIPPTFPFFGNVNPNIVAVLDVKSFSHLFDMDLVDKRDVLIGDFRPSLGFYGGVRVGVYLDTTEPKHAQIKGFAMETLKRSSKVWLQELRSNLNIFWGTIESEISKNGAASYIFPLQRCIFSFLCASLAGVDASVSPDIAENGWKTINTWLALQVIPTAKLGVVPQPLEEILLHTWPYPSLLIAGNYKKLYNFIDENAGDCLRLGQEEFGLTRDEAIQNLLFVLGFNAYGGFSVFLPSLIGRITGDNSGLQERIRTEVRRVCGSGSDLNFKTVNEMELVKSVVYETMRFSPPVPLQFARARKDFQISSHDAVFEVKKGELLCGY…
AtCYP75B1	MATLFLTILLATVLFLILRIFSHRRNRSHNNRLPPGPNPWPIIGNLPHMGTKPHRTLSAMVTTYGPILHLRLGFVDVVVAASKSVAEQFLKIHDANFASRPPNSGAKHMAYNYQDLVFAPYGHRWRLLRKISSVHLFSAKALEDFKHVRQEEVGTLTRELVRVGTKPVNLGQLVNMCVVNALGREMIGRRLFGADADHKADEFRSMVTEMMALAGVFNIGDFVPSLDWLDLQGVAGKMKRLHKRFDAFLSSILKEHEMNGQDQKHTDMLSTLISLKGTDLDGDGGSLTDTEIKALLLNMFTAGTDTSASTVDWAIAELIRHPDIMVKAQEELDIVVGRDRPVNESDIAQLPYLQAVIKENFRLHPPTPLSLPHIASESCEINGYHIPKGSTLLTNIWAI…
AtCYP76C1	MDIISGQALLLLFCFILSCFLIFTTTRSGRISRGATALPPGPPRLPIIGNIHLVGKHPHRSFAELSKTYGPVMSLKLGSLNTVVIASPEAAREVLRTHDQILSARSPTNAVRSINHQDASLVWLPSSSARWRLLRRLSVTQLLSPQRIEATKALRMNKVKELVSFISESSDREESVDISRVAFITTLNIISNILFSVDLGSYNAKASINGVQDTVISVMDAAGTPDAANYFPFLRFLDLQGNVKTFKVCTERLVRVFRGFIDAKIAEKSSQNNPKDVSKNDFVDNLLDYKGDESELSISDIEHLLLDMFTAGTDTSSSTLEWAMTELLKNPKTMAKAQAEIDCVIGQNGIVEESDISKLPYLQAVVKETFRLHTPVPLLIPRKAESDAEILGFMVLKDT…
AtCYP76C2	MDIIFEQALFPLFCFVLSFFIIFFTTTRPRSSRKVVPSPPGPPRLPIIGNIHLVGRNPHHSFADLSKTYGPIMSLKFGSLNTVVVTSPEAAREVLRTYDQILSSRTPTNSIRSINHDKVSVVWLPPSSSRWRLLRKLSATQLFSPQRIEATKTLRENKVKELVSFMSESSEREEAVDISRATFITALNIISNILFSVDLGNYDSNKSGVFQDTVIGVMEAVGNPDAANFFPFLGFLDLQGNRKTLKACSERLFKVFRGFIDAKLAEKSLRDTNSKDVRERDFVDVLLDLTEGDEAELNTNDIVHLLLDLFGAGTDTNSSTVEWAMAELLRNPETMVKAQAEIDCVIGQKGVVEESDISALPYLQAVVKETFRLHPAAPLLVPRKAESDVEVLGFMVPKD…
AtCYP76C3	MDLSLIQGMSLPLYFLLTLFFFFFATAKTRRSSSTGTLPPGPPILPLVGNIFQLGFNPHRSLAAFSKTYGPIMSLKLGRLTAVVISSPEAAKEALRTHDHVMSARTFNDALRAFDHHKHSIVWIPPSARWRRFLKKTITKYLLSPQNLDAIQSLRMRKVEELVSLVNEFRERGEAIDLARASFVTSFNIISNALFSVDLATYDSNSSSYEFHNTVVHLTDIAGIPNVGDYFQYMRFLDLQGTRKKAVLCIEKLFRVFQEFIDARLAKRFSRTEKEPKEASSIDMLDSLLDLTQQNEAELTMNDLKHLLLDVFVAGTDTNSSTMEWAMTELFRSTEKMVKAQSEIRQVIGQNGFVQESDIPSLPYLQAIVKETLRLHPAAPLIPRKSESDVQIMGFLVPK…
AtCYP76C4	MDIISGQALFLLFCFISSCFLISTTARSRRSSGRAATLPPGPPRLPIIGNIHQVGKNPHSSFADLAKIYGPIMSLKFGCLNSVVITSPEAAREVLRTHDQILSGRKSNDSIRCFGHEEVSVIWLPPSSARWRMLRKLSVTLMFSPQRTEATKALRMKKVQELVSFMNESSERKEAVDISRASYTTVLNIISNILFSVDLGSYDSKKSNEFQDTVIGAMEAAGKPDAANYFPFMGFLDLQGNRKAMRGLTERLFRVFRGFMDAKIAEKSLGNYSKDVSNRDFLDSLLILNEGDEAELDNNDIEHLLLDMFTAGTDTSSSTLEWAMAELLRNPKTMVKAQAEMDRVLGQNSVVQESDISGLPYLQAVVKETFRLHPAAPLLVPRKAESDVEVLGFMVPKDT…
AtCYP76C5	MDIISGQPMFLLFCFILSCFLFFTAARSRRSPTQVLSKSPPGPPRLPIIGNIHLVGKNPHHSFTDLSKTYGPVMSLKLGYLNSVVITSRDAAREVLKAHDQILSGRYITQATKSNNHHEFSVGWIHPSSPRFRKVEEMTFTQLFSPQRIEATKALRMKKVQELVNFLSESSERGEAVDISRASFVTALNIISNILFSVNLGSYDSKNSSAFQEMVIGYMESIGNPDVSNFFPFMRLLDLQGNSKKMKEYSGKLLQVFREFYDARILENSSRIDEKDVSSRDFLDALIDLQQGDESEINIDEIEHLLLDMFLAGTDTNSSTVEWAMTELLGNPKTMTKVQDEINRVIRQNGDVQESHISKLPYLQAVIKETFRLHPAAPFLLPRKAERDVDILGFHVPKD…
AtCYP76C6	MDIISGQPLFLIFCFILSCLLFFTTARSRRSPCQLSKSPPGPPRLPIIGNIHLVGKNPHHSFTDLSKTYGPVMSLKLGCLNSVVIASRDAVREVLKTHDQILSGRYISEATKSNNHHEFSVGWIHPSSSRFRMLRKLSATQLFSPQCIQATKALRMKKVQELVNFLSESCEREEAVDISHVSFVTALNIISNILFSVNLGSYDSKNSSAFQEMVIGYQESIGNPDLANFFPFMRFLDLQGNSKKMRESSGRLLQVFREFYDARIVEKSSRSVEKDVSSKDFLDVLIDLQQGDETEINIDEIEHLLLDMFVAGTDTNSSTVEWAMAELLGNPKTMTKVQDEINHVIGQNGDFQESDISKLPYLKAVVKETFRLHPAAPFLLQRKAETNVEILGFTVLKDS…
AtCYP76C7	MDIVAIVLSLLFIFFLFFFFYTTGKSCPGGAKNPPGPSKLSLLRNILQTVEKPHRSLADLSRIYGSVMSFKLGCLTTVVISSPETAKEVLKTHDHVLSYRVSSDPVRAAGHHELSLLWIPPLARWRFLRKITRNQLFSTQRLEATSAIRTRKVQELMNFVNKCCERREAVNISRASFITSLNIISNALFSTNLANFDDSKTFHDFQNVVIRMMEISGKPNLADFFPFLGFLDLQGARKEARLLMHKLFRVFQGFIDTKRSSTSRNNNDMLDSLLDIAHKKESELDDNNIKHLLLDLFLAGVDTSSSAVEWAMAELLRNPKMIVKVQEEIRQVIGLKGTVQDLDIVKLPYLQAVVKESLRLHPPAPFLVPRKSESDDVQIFEFLIPKNTQVLVNVWAIGR…
AtCYP76G1	MINQLTKNELIGLFTSIAVLIYVTCLFYTKRCRTRLPPGPNPWPVIGNIFQLAGLPPHDSLTKLSRRHGPIMTLRIGSMLTVVISSSEVAREIFKKHDAALAGRKIYEAMKGGKSSDGSLITAQYGAYWRMLRRLCTTQFFVTRRLDAMSDVRSRCVDQMLRFVEEGGQNGTKTIDVGRYFFLMAFNLIGNLMFSRDLLDPDSKRGSEFFYHTGKVMEFAGKPNVADFFPLLRFLDPQGIRRKTQFHVEKAFEIAGEFIRERTEVREREKSDEKTKDYLDVLLEFRGGDGVDEEPSSFSSRDINVIVFEMFTAGTDTTTSTLEWALAELLHNPRTLTKLQTELRTYFKSSNQKLQEEDLPNLPYLSAVIMETLRLHPPLPFLVPHKAMSTCHIFDQYTI…
AtCYP77A4	MFPLISFSPTSLDFTFFAIIISGFVFIITRWNSNSKKRLNLPPGPPGWPVVGNLFQFARSGKPFFEYAEDLKKTYGPIFTLRMGTRTMIILSDATLVHEALIQRGALFASRPAENPTRTIFSCNKFTVNAAKYGPVWRSLRRNMVQNMLSSTRLKEFGKLRQSAMDKLIERIKSEARDNDGLIWVLKNARFAAFCILLEMCFGIEMDEETIEKMDEILKTVLMTVDPRIDDYLPILAPFFSKERKRALEVRREQVDYVVGVIERRRRAIQNPGSDKTASSFSYLDTLFDLKIEGRKTTPSNEELVTLCSEFLNGGTDTTGTAIEWGIAQLIANPEIQSRLYDEIKSTVGDDRRVDEKDVDKMVFLQAFVKELLRKHPPTYFSLTHAVMETTTLAGYDIP…
AtCYP77A6	MSILSFPHTFFNISPSLFYTILISSLVLLILTRRSAKSKIVKLPPGPPGWPVVGNLFQFARSGKQFYEYVDDVRKKYGPIYTLRMGSRTMIIISDSALVHDVLIQRGPMFATRPTENPTRTIFSSNTFTVNASAYGPVWRSLRKNMVQNMLSSIRFREFGSLRQSAMDKLVERIKSEAKDNDGLVWVLRNARFAAFCILLEMCFGIEMDEESILNMDQVMKKVLITLNPRLDDYLPILAPFYSKERARALEVRCEQVDFIVKLIERRRRAIQKPGTDKTASSFSYLDTLFDLKTEGRITTPSNEELVSLCSEFLNGGTDTTGTAIEWGIAQLIVNPEIQSRLYDEIKSTVGDREVEEKDVDKMVFLQAVVKEILRKHPPTYFTLTHSVTEPTTVAGYDV…
AtCYP77A7	MSFLSFSPISLDLLSSNVFLTILAIIISGLLKTITYRKHNSNHLNLPPGPPGWPVIGNLFQFTRSGKQFFEYVEDLVKIYGPILTLRLGTRTMIIISDASLAHEALIERGAQFATRPVETPTRKIFSSSEITVHSAMYGPVWRSLRRNMVQNMLSSNRLKEFGSVRKSAMDKLIERIKSEARDNDGLVWVLQNSRYAAFCVLLDICFGVEMEEESIEKMDQLMTAILNAVDPKLHDYLPILTPFNYNERNRALKLRRELVDFVVGFIEKRRKAIRTATVSSFSYLDTLFDLRIIEGSETTPSDEDLVTLCSEFLNAGTDTTGAAIEWGIAELIANPEIQSRLYDEIKSTVGDRAVDERDVDKMVLLQAVVKEILRRHPPTYFTLSHGVTEPTTLSGYNI…
AtCYP77A9	MLDISNYVFFFFTLVTILLSCLVYILTRHSHNPKCANLPPGPKGWPVVGNLLQFARSGKQFFEYVDEMRNIYGPIFTLKMGIRTMIIISDANLAHQALIERGAQFATRPAETPTRKIFSSSDITVHSAMYGPVWRSLRRNMVQNMLCSNRLKEFGSIRKSAIDKLVEKIKSEAKENDGLVWVLRNARFAAFCILLDMCFGVKMEEESIEKMDQMMTEILTAVDPRIHDYLPILTPFYFKERKNSLELRRKLVQFVVGFIEKRRLAIRNLGSDKTASSFAYLDTLFDLRVDGRETSPSDEDLVTLCSEFLNAGTDTTGTAIEWGIAELISNPKIQSRLYDEIKSTVGDDRTVEEKDLNKMVFLQAFVKELLRRHPPTYFTLTHGVTEPTNLAGYDIPVGA…
AtCYP77B1	MDLTDVIIFLFALYFINLWWRRYFSAGSSQCSLNIPPGPKGWPLVGNLLQVIFQRRHFVFLMRDLRKKYGPIFTMQMGQRTMIIITDEKLIHEALVQRGPTFASRPPDSPIRLMFSVGKCAINSAEYGSLWRTLRRNFVTELVTAPRVKQCSWIRSWAMQNHMKRIKTENVEKGFVEVMSQCRLTICSILICLCFGAKISEEKIKNIENVLKDVMLITSPTLPDFLPVFTPLFRRQVREARELRKTQLECLVPLIRNRRKFVDAKENPNEEMVSPIGAAYVDSLFRLNLIERGGELGDEEIVTLCSEIVSAGTDTSATTLEWALFHLVTDQNIQEKLYEEVVGVVGKNGVVEEDDVAKMPYLEAIVKETLRRHPPGHFLLSHAAVKDTELGGYDIPAGA…
AtCYP78A10	MTIDMYLSFASRSGSSPFPSLELCLSIFLFISLFVFWLTPGGFAWALYKARFHTRPESKTGPAIPGPSGLPIFGLLLAFVNNALTHRILANIADTCKAKALMAFSVGSTRFVITSEPETAKELLNSSAFADRPVKESAYELLFDRAMGFAPFGDYWRELRRISSTHLFSPKRIFSSGESRRKIGQNMVGEIKNAMECYGEVHIKKILHFGSLNNVMSSVFGKTYNFNEGIVYSKESNELEHLVSEGYELLGIFNWSDHFPGMRWLDLQGVRRRCRSLVGRVNVFVGKIINDHKSKRSLRDNPEESTYDDDFVDVLLGMHGNSKLSDSDMIAVLWEMIFRGTDTVAILLEWILARMVLHPDIQAKAQAEIDCIVGDSGRQVTDSDLPKLPYVRAIVKETL…
AtCYP78A5	MSPEAYVLFFNSFNLVTFEAFASVSLIIATVAFLLSPGGLAWAGPGSSKSRVSIPGPSGSLSVFSGSNPHRVLAALAKRFKASPLMAFSVGFSRFVISSEPETAKEILSSSAFADRPVKESAYELLFHRAMGFAPYGEYWRNLRRISSTHLFSPRRIASFEGVRVGIGMKMVKKIKSLVTSDACGEVEVKKIVHFGSLNNVMTTVFGESYDFDEVNGKGCFLERLVSEGYELLGIFNWSDHFWFLRWFDFQGVRKRCRALVSEVNTFVGGIIEKHKMKKGNNLNGEENDFVDVLLGLQKDEKLSDSDMIAVLWEMIFRGTDTVAILVEWVLARMVLHQDIQDKLYREIASATSNNIRSLSDSDIPKLPYLQAIVKETLRLHPPGPLLSWARLAIHDVHV…
AtCYP78A6	MATKLESSLIFALLSKCSVLSQTNLAFSLLAVTIIWLAISLFLWTYPGGPAWGKYLFGRLISGSYKTGNVIPGPKGFPLVGSMSLMSSTLAHRRIADAAEKFGAKRLMAFSLGETRVIVTCNPDVAKEILNSPVFADRPVKESAYSLMFNRAIGFAPHGVYWRTLRRIASNHLFSTKQIRRAETQRRVISSQMVEFLEKQSSNEPCFVRELLKTASLNNMMCSVFGQEYELEKNHVELREMVEEGYDLLGTLNWTDHLPWLSEFDPQRLRSRCSTLVPKVNRFVSRIISEHRNQTGDLPRDFVDVLLSLHGSDKLSDPDIIAVLWEMIFRGTDTVAVLIEWILARMVLHPDMQSTVQNELDQVVGKSRALDESDLASLPYLTAVVKEVLRLHPPGPLLS…
AtCYP78A7	MELMNLASKETSYWMIALPAGFGSQNLHDVSTLGYLFLAVVFLSIVTWALAGGGGVAWKNGRNRLGRVAIPGPRGIPVFGSLFTLSRGLAHRTLAAMAWSRANTEIMAFSLGSTPVIVASEPNIAREILMSPHFADRPVKQSAKSLMFSRAIGFAPNGTYWRMLRRIASTHLFAPRRILAHEAGRQLDCAEMVKAVSVEQNGAGSVVLRKHLQLAALNNIMGSVFGRRYDPLAQKEDLDELTSMVREGFELLGAFNWSDYLPWLGYFYDSIRLNQRCSDLVPRIRTLVKKIIDEHRVSNSEKKRDIGDFVDVLLSLDGDEKLQEDDMIAVLWEMIFRGTDTTALLTEWTMAELVLNPNVQTKLRDEILTAVGDGADGDVADADLAKLPYLNAVVKETLR…
AtCYP78A8	MRTEIESLWVFALASKFNIYMQQHFASLLVAIAITWFTITIVFWSTPGGPAWGKYFFTRRFISLDYNRKYKNLIPGPRGFPLVGSMSLRSSHVAHQRIASVAEMSNAKRLMAFSLGDTKVVVTCHPAVAKEILNSSVFADRPVDETAYGLMFNRAMGFAPNGTYWRTLRRLGSNHLFNPKQIKQSEDQRRVIATQMVNAFARNPKSACAVRDLLKTASLCNMMGLVFGREYELESNNNLESECLKGLVEEGYDLLGTLNWTDHLPWLAGLDFQQIRFRCSQLVPKVNLLLSRIIHEQRAATGNFLDMLLSLQGSEKLSESDMVAVLWEMIFRGTDTVAVLVEWVLARIVMHPKVQLTVHDELDRVVGRSRTVDESDLPSLTYLTAMIKEVLRLHPPGPL…
AtCYP78A9	MATKLDTSSLLLALLSKCSLLTQTNLALSLLVASLASLALSLFFWSHPGGPAWGKYFLHRRRQTTVIPGPRGLPFVGSMSLMSNTLAHRCIAATAEKFRAERLMAFSLGETRVIVTCNPDVAKEILNSPVFADRPVKESAYSLMFNRAIGFAPYGVYWRTLRKIASNHLFSPKQIKRSETQRSVIANQIVKCLTKQSNTKGLCFARDLIKTASLNNMMCSVFGKEYELEEEHEEVSELRELVEEGYDLLGTLNWTDHLPWLSEFDPQRIRSRCSNLVPKVNRFVNRIISDHREQTRDSPSDFVDVLLSLDGPDKLSDPDIIAVLWEMIFRGTDTVAVLIEWILARMVLHPDIQSTVHNELDQIVGRSRAVEESDVVSLVYLTAVVKEVLRLHPPGPLLS…
AtCYP79A2	MLAFIIGLLLLALTMKRKEKKKTMLISPTRNLSLPPGPKSWPLIGNLPEILGRNKPVFRWIHSLMKELNTDIACIRLANTHVIPVTSPRIAREILKKQDSVFATRPLTMGTEYCSRGYLTVAVEPQGEQWKKMRRVVASHVTSKKSFQMMLQKRTEEADNLVRYINNRSVKNRGNAFVVIDLRLAVRQYSGNVARKMMFGIRHFGKGSEDGSGPGLEEIEHVESLFTVLTHLYAFALSDYVPWLRFLDLEGHEKVVSNAMRNVSKYNDPFVDERLMQWRNGKMKEPQDFLDMFIIAKDTDGKPTLSDEEIKAQVTELMLATVDNPSNAAEWGMAEMINEPSIMQKAVEEIDRVVGKDRLVIESDLPNLNYVKACVKEAFRLHPVAPFNLPHMSTTDTVV…
AtCYP79B2	MNTFTSNSSDLTTTATETSSFSTLYLLSTLQAFVAITLVMLLKKLMTDPNKKKPYLPPGPTGWPIIGMIPTMLKSRPVFRWLHSIMKQLNTEIACVKLGNTHVITVTCPKIAREILKQQDALFASRPLTYAQKILSNGYKTCVITPFGDQFKKMRKVVMTELVCPARHRWLHQKRSEENDHLTAWVYNMVKNSGSVDFRFMTRHYCGNAIKKLMFGTRTFSKNTAPDGGPTVEDVEHMEAMFEALGFTFAFCISDYLPMLTGLDLNGHEKIMRESSAIMDKYHDPIIDERIKMWREGKRTQIEDFLDIFISIKDEQGNPLLTADEIKPTIKELVMAAPDNPSNAVEWAMAEMVNKPEILRKAMEEIDRVVGKERLVQESDIPKLNYVKAILREAFRLHP…
AtCYP79B3	MDTLASNSSDLTTKSSLGMSSFTNMYLLTTLQALAALCFLMILNKIKSSSRNKKLHPLPPGPTGFPIVGMIPAMLKNRPVFRWLHSLMKELNTEIACVRLGNTHVIPVTCPKIAREIFKQQDALFASRPLTYAQKILSNGYKTCVITPFGEQFKKMRKVIMTEIVCPARHRWLHDNRAEETDHLTAWLYNMVKNSEPVDLRFVTRHYCGNAIKRLMFGTRTFSEKTEADGGPTLEDIEHMDAMFEGLGFTFAFCISDYLPMLTGLDLNGHEKIMRESSAIMDKYHDPIIDERIKMWREGKRTQIEDFLDIFISIKDEAGQPLLTADEIKPTIKELVMAAPDNPSNAVEWAIAEMINKPEILHKAMEEIDRVVGKERFVQESDIPKLNYVKAIIREAFRL…
AtCYP79C1	MDYYLNNVIFSVVVTFSITLNIVFLIKSVVARFLGRRKKLPPCPRGFPIIGNLVGMLKNRPTSKWIVRVMNDMKTDIACFRFGRVHVIVITSDVIAREVVREKDAVFADRPDSYSAEYISGGYNGVVFDEYGERQMKMKKVMSSELMSTKALNLLLKVRNLESDNLLAYVHNLYNKDESKTKHGAVVNVRDIVCTHTHNVKMRLLFGRRHFKETTMDGSLGLMEKEHFDAIFAALDCFFSFYVADYYPFLRGWNLQGEEAELREAVDVIARYNKMIIDEKIELWRGQNKDYNRAETKNDVPMIKDWLDILFTLKDENGKPLLTPQEITHLSDLDVVGIDNAVNVIEWTLAEMLNQREILEKAVEEIDMVVGKERLVQESDVPNLNYVKACCRETLRLHP…
AtCYP79C2	MTIITNPSSFTLVLISITLVLALARRFSRFMKPKGQLPPGPRGWPIVGNMLQMIINRPAHLWIHRVMEELQTDIACYRFARFHVITVTSSKIAREVLREKDEVLADRSESYASHLISHGYKNISFSSYGENWKLVKKVMTTKLMSPTTLSKTLGYRNIEADNIVTYVYNLCQLGSVRKPINVRDTILTYCHAVMMRMMFGQRHFDEVVENGGLGPKEKEHMDAIYLALDCFFSFNLTNYIPFLRGWNVDKAETEVREAVHIINICNDPIIQERIHLWRKKGGKQMEEDWLDILITLKDDQGMHLFTFDEIRAQCKEINLATIDNTMNNVEWTIAEMLNHPEILEKATNELDIIVGKDRLVQESDISQLNYIKACSKESFRLHPANVFMPHHVAREDTTL…
AtCYP79F1	MMSFTTSLPYPFHILLVFILSMASITLLGRILSRPTKTKDRSCQLPPGPPGWPILGNLPELFMTRPRSKYFRLAMKELKTDIACFNFAGIRAITINSDEIAREAFRERDADLADRPQLFIMETIGDNYKSMGISPYGEQFMKMKRVITTEIMSVKTLKMLEAARTIEADNLIAYVHSMYQRSETVDVRELSRVYGYAVTMRMLFGRRHVTKENVFSDDGRLGNAEKHHLEVIFNTLNCLPSFSPADYVERWLRGWNVDGQEKRVTENCNIVRSYNNPIIDERVQLWREEGGKAAVEDWLDTFITLKDQNGKYLVTPDEIKAQCVEFCIAAIDNPANNMEWTLGEMLKNPEILRKALKELDEVVGRDRLVQESDIPNLNYLKACCRETFRIHPSAHYVPS…
AtCYP79F2	MMMKISFNTCFQILLGFIVFIASITLLGRIFSRPSKTKDRCRQLPPGRPGWPILGNLPELIMTRPRSKYFHLAMKELKTDIACFNFAGTHTITINSDEIAREAFRERDADLADRPQLSIVESIGDNYKTMGTSSYGEHFMKMKKVITTEIMSVKTLNMLEAARTIEADNLIAYIHSMYQRSETVDVRELSRVYGYAVTMRMLFGRRHVTKENMFSDDGRLGKAEKHHLEVIFNTLNCLPGFSPVDYVDRWLGGWNIDGEEERAKVNVNLVRSYNNPIIDERVEIWREKGGKAAVEDWLDTFITLKDQNGNYLVTPDEIKAQCVEFCIAAIDNPANNMEWTLGEMLKNPEILRKALKELDEVVGKDRLVQESDIRNLNYLKACCRETFRIHPSAHYVPPH…
AtCYP81D1	MEETNIRVVLYSIFSLIFLIISFKFLKPKKQNLPPSPPGWLPIIGHLRLLKPPIHRTLRSFSETLDHNDGGGVMSLRLGSRLVYVVSSHKVAAEECFGKNDVVLANRPQVIIGKHVGYNNANMIAAPYGDHWRNLRRLCTIEIFSTHRLNCFLYVRTDEVRRLISRLSRLAGTKKTVVELKPMLMDLTFNNIMRMMTGKRYYGEETTDEEEAKRVRKLVADVGANTSSGNAVDYVPILRLFSSYENRVKKLGEETDKFLQGLIDDKRGQQETGTTMIDHLLVLQKSDIEYYTDQIIKGIILIMVIAGTNTSAVTLEWALSNLLNHPDVISKARDEIDNRVGLDRLIEEADLSELPYLKNIVLETLRLHPATPLLVPHMASEDCKIGSYDMPRGTTLLVN…
AtCYP81D10P	MEDETQTLILITILILTLITLTFLIKKLKPKPNLPPSPPFSLPIIGHLRLLKPPLHRLFLTISKSLNDSPIFSLRLGNKLVFVVSSHSIVEECFTKNDVVLANRPKSIASHISYNYASMVSAPYSEHWRNLRRIGAVEIFSNHRLNSFYTIRRDEIRRLIARLSRSPNASLEFAKVEMNSMLSNLAFNNIIRMVTGKCYYGDGAEDDPEAKRVRQLIAEAMSCFGAGHAADHLPMLRWITDFERRVKKIAARLDEFFQRLVDEKRVAKEKKENTMIDHLLSLQVSQPEYYTDHTIKGTMLSLILAGTDTSAVTLEWALSSLLNNPEVLKKVRDEIDNQIGLDRLLEESDIPNLPYLQNIVSETLRLYPAGPLLVPHISSEDCKVGGYDMPCGTMLLVNV…
AtCYP81D11	MSSTKTIMETIYLILSLFFFFIFLSLKLLFGPRPRKLNLPPSPSRPFPIIGHLHLLKLPLHRRFLSLSESLNNAKIFSLSLGSRLVFVVSSHAVAEECFTKNDVVLANRPEFLVGKHIGYNSTTMVGAAYGDSWRNLRRIGTIEIFSSLRLNSFVSIRQDEIRRLIICLAKNSQHGFVKVEMKPLFMCLTINNIIRMVAGKRFYGDGTENDNEAKHVRQLIAEVVVSGGAGNAADYFPILRYVTNYEKHVKKLAGRVDEFLQSLVNEKRVEKVKGNTMIDHLLSLQETQPDYYTDVIIKGIILVMILAGTDTSAGTLEWAMSNLLNHPEVLRKAKTEIDDQIGVDRLVEEQDIVKLPYLQHIVSETLRLYPVAPMLLPHLASEDCIVDGYDVPRGTIIL…
AtCYP81D2	MEALMLIFTFCFIVLSLIFLIGRIKRKLNLPPSPAWALPVIGHLRLLKPPLHRVFLSVSQSLGDAPIISLRLGNRLLFVVSSHSIAEECFTKNDVILANRQTTISTKHISYGNSTVVSASYSEHWRNLRRIGALEIFSAHRLNSFSSIRRDEIRRLIGRLLRNSSYGFTKVEMKSMFSDLTFNNIIRMLAGKCYYGDGKEDDPEAKRVRTLIAEAMSSSGPGNAADYIPILTWITYSETRIKKLAGRLDEFLQGLVDEKREGKEKKENTMVDHLLCLQETQPEYYMDRIIKGTMLSLIAGGTDTTAVTLEWALSSLLNNPEVLNKARDEIDRMIGVDRLLEESDIPNLPYLQNIVSETLRLYPAAPMLLPHVASKDCKVGGYDMPRGTMLLTNAWAIHR…
AtCYP81D3	MEGQTLIFTFLFISLSLTFIIGRIKRRPNLPPSPSWALPVIGHLRLLKPPLHRVFLSVSESLGDAPIISLRLGNRLVFVVSSHSLAEECFTKNDVVLANRFNLASKHISYGCTTVVTASYGDHWRNLRRIGAVEIFSAHRLNSFSSIRRDEIHRLIACLRNSSLEFTKVEMKSMFSNLTFNNIIRMLAGKCYYGDGAEDDPEAKRVRELIAEGMGCGAGNTADYLPILTWITGSEKRIKKIASRLDEFLQGLVDERREGKEKRQNTMVDHLLCQETQPEYYTDNIIKGIMLSLILAGTDTSAVTLEWTLSALLNHPQILSKARDEIDNKVLNRLVEESDLSHLPYLQNIVSESLRLYPASPLLVPHVASEDCKVGGYHMPRGTMLLTAWAIHRDPKIWD…
AtCYP81D4	MDLNQILILSFLSLFTLAIFLLTRSKRKLNLPPSPAISLPVIGHLHLLKPPLHRTFLSLSKSIGNAPVFHLRLGNRLVYVISSRSIAEECFTKNDVVLANRPKFTISKHLGYNATYLLSASYGDHWRNLRRIAAVEIFSTHRLNSFLYIRKDEIRRLISHLSRDSLHGFVEVEMKTLLTNLASNTTIRMLAGKRYFGEDNDDAKLVKNLVSEAVTSAGAGNPIDYLSILRWVSSYEKRIKNLGNRFDTFLQKLVDEKRAEKEKGETMIDHLLALQDIQPDYYTDVIIKGIILTLIIAGTDTSSVTLEWAMSNLLNHPEILKKARMEIDEKVGLDRLVDESDIVNLSYLQSIVLETLRMYPAVPLLLPHLSSEDCKVGGYDIPSGTMVLTNAWAMHRDPE…
AtCYP81D5	MDLTQILLLSFLFLTISIKLLLTKSNRKPNLPPSPAYPLPVIGHHLLKQPVHRTFHSISKSLGNAPIFHLRLGNRLVYVISSHSIAEECFTKNDVVLANRPIIMAKHVGYNFTNMIAASYGDHWRNLRRIAAVEIFSSHRISTFSSIRKDEIRRLITHSRDSLHGFVEVELKSLLTNLAFNNIIMMVAGKRYYGTGTEDNDEAKLVRELIAEIMAAGSGNLADYLPSINWVTNFENQTKILGNRLDRVLQKLVDEKRAEKEKGQTLIDHLLSFQETEPEYYTDVIIKGIILALVLAGTDTSSVTLEWAMSNLLNHPEILEKARAEIDDKIGSDRLVEESDIVNLHYLQNIVSETLRLYSAVPLLLPHFSSDECKVAGYDMPRRTLLLTNVWAMHRDPGL…
AtCYP81D6	MHVSIQHIYKFLDLNMETYFLLLSLAFFLFISVKLLFGKRLSKFNLPPSPARPLPLIGHLHLLKLPLHRTFLSFSQSLGGAPIFCLRLGNRLTVVVSSYSIAEECFTKNDIVFANRPELILGKHIEYNSTTMTSAPYGDHWRNLRRIATLEIFASHKLNGFLSVRKDEIRQLLLRLSKNSRHGFAKVEMRHLLFELTINNVFRMVAGKRFYGEGTEQDEVAQQVRHLMDEIVTSAGAGNAADYLPIMRWFTNFEKRVKNLAIRIDKFLQSLVDEKRADKEKGTTMIDHLLSLQESQPDYYTDVTLKGIIIVMIIAGSETIAWTLEWAMLNVLNHPEVLKKARTEIDTKIGFDRLMDEADTKNLPYLQWIVLETLRLHPAAPTNVPHSTSEDCMLAGYDV…
AtCYP81D7	METHFLILSLAFLFFISLKLLFGKRHSKFNLPPSPARPLPFIGHLHLLKQPLHRTFLSFSQSLGDAPIFSLRLGNHLTVVVSSYSIAEECFTKNDIVLANRPKFILGKHIEYNFTTMTSAPYGDHWRNLRRIGTLEIFSSHKLNGFLSVRKDEIRHLLLRLSKNSQHGFAKVEMRQLFYDLTINNILRMVAGKRFYGEGTEQDEVARRVTQLIDEIVYRAGVGNAADYIPILRWITDFEKGVKELASRVDEFLQSLVDERRVHKQKGNTMMDHLLSLQETQPDYYTDVTLKGIIIVMILAGTETLAGTLEWAMLNLLNHPEVLEKARTEIDTEVGFDRLMDEADTKNLPYLQWIVLETLRLYPVAPTNIPHMTSDDCILAGYDVPRGSMLLVNVWSMHR…
AtCYP81D8	METKTLIFSILFVVLSLIYLIGKLKRKPNLPPSPAWSLPVIGHLRLLKPPIHRTFLSLSQSLNNAPIFSLRLGNRLVFVNSSHSIAEECFTKNDVVLANRPNFILAKHVAYDYTTMIAASYGDHWRNLRRIGSVEIFSNHRLNSFLSIRKDEIRRLVFRLSRNFSQEFVKVDMKSMLSDLTFNNILRMVAGKRYYGDGVEDDPEAKRVRQLIADVVACAGAGNAVDYLPVLRLVSDYETRVKKLAGRLDEFLQGLVDEKREAKEKGNTMIDHLLTLQESQPDYFTDRIIKGNMLALILAGTDTSAVTLEWALSNVLNHPDVLNKARDEIDRKIGLDRLMDESDISNLPYLQNIVSETLRLYPAAPMLLPHVASEDCKVAGYDMPRGTILLTNVWAIHRD…
AtCYP81F1	MLYFILLPLLFLVISYKFLYSKTQRFNLPPGPPSRPFVGHLHLMKPPIHRLLQRYSNQYGPIFSLRFGSRRVVVITSPSLAQESFTGQNDIVLSSRPLQLTAKYVVYNHTTVGTAPYGDHWRNLRRMCSQEILSSHRLIIFQHIRKDEILRMLTRLSRYTQTSNESNDFTHIELEPLLSDLTFNNIVRMVTGKRYYGDDVNNKEEAELFKKLVYDIAMYSGANHSADYLPILKLFGNKFEKEVKAIGKSMDDILQRLLDECRRDKEGNTMVNHLISLQQQQPEYYTDVIIKGLMMSMMLAGTETSAVTLEWAMANLLRNPEVLEKARSEIDEKIGKDRLIDESDIAVLPYLQNVVSETFRLFPVAPFLIPRSPTDDMKIGGYDVPRDTIVMVNAWAIHR…
AtCYP81F2	MDYVLIVLPLALFLIAYKFLFSSKTQGFNLPPGPTPFPIVGHLHLVKPPVHRLFRRFAEKYGDIFSLRYGSRQVVVISSLPLVRESFTGQNDVILTNRPHFLTAKYVAYDYTTIGTAAYGDHWRNLRRICSLEILSSNRLTGFLSVRKDEIRRLLTKLSREYDGRVVELEPLLADLTFNNIVRMVTGRRYYGDQVHNKEEANLFKKLVTDINDNSGASHPGDYLPILKVFGHGYEKKVKALGEAMDAFLQRLLDECRINGESNTMVSHLLSLQLDQPKYYSDVIIKGLMLSMMLAGTDTAAVTLEWAMANLLKKPEVLKKAKAEIDEKIGEERLVDEPDIANLPYLQNIVSETFRLCPAAPLLVPRSPSEDLKIGGYDIPRGTIVLVNAWAIHRDPRLW…
AtCYP81F3	MFYYVIVLPLALFLLAYKLFFTSKTKRFNLPPSPPYSLPILGHHNLLKPPVHRLFHRLSKTHGPIFSLQFGSRRAVVISSSSLATQCFTGQNDIILSNRPCFLTAKYVAYNYTTVGTAPYGDHWRNLRRICSLEILSSNRLTNFLHIRKDEIHRMLTRLSRDVNKEIELEPLLSDLTFNNIVRMVTGKRYYGDEVHNEEEANVFKKLVADINDCSGARHPGDYLPFMKMFGGSFEKKVKALAEAMDEILQRLLEECKRDKDGNTMVNHLLSLQQNEPEYYTDVTIKGLMLGMMIAGTDTSAVTLEWAMSSLLNHPEALEKAKLEIDEKIGQERLIDEPDIANLPYLQNIVSETFRLYPAAPLLVPRSPTEDIKVGGYDVPRGTMVMVNAWAIHRDPELW…
AtCYP81F4	MFNYVIILPLALFLLAYKFFFTSKKQRYYLPPSPSYSLPILGHHLLIKPPVHRLFHRLSNIHGPIFYLRLGSRRAVVISSSSLARECFTGQNDVIVSNRPRFLTSKYIAYNYTTIATTSYGDHWRNLRRICSLEIVSSKRLANFLHIRKEEIQRMLTRLSRDARVGKEVELESILYDLTFNNIVRMVTGKIYYGDDVSDKEEAELFKKLFTFITTNSGARHPGEYLPFMKIFGGSFEKEVKAAAKVIDEMLQRLLDECKSDKDGNTMVNHLLSLQQDDPEYYTDIIIKGLMLGIMVASSETSALTIEWAMASLLNHPKVLDKVKLEIDEIIGQDRLIEESDIANLPYLQNVVSETLRLHPAAPVLVPRSTAEDIKIGGYDVPRDTMVMVNAWAIHRDPD…
AtCYP81G1	MRLVSRIMCSRMGEMIDLFLLALMAGFIAVAYVFRSKQKKNLPPNPVGFPVIGHLHLLKEPVHRSLRDLSRNLGIDVFILRLGSRRAVVVTSASAAEEFLSQQNDVVFANRPLATLTEYMGYNNTLVSTAPYGEHWRRLRRFCAVDILSTARLRDFSDIRRDEVRAMIRKINVELVTSGGSVRLKLQPFLYGLTYNILMSMVAGKREEDEETKEVRKLIREVFDFAGVNYVGDFLPTLKLFDLDGYRKRAKKLASKLDKFMQKLVDEHRKNRGKAELEKTMITRLLSLQESEPECYTDDIIKGLVQVMLLAGTDTTAVTLEWAMANLLNHPEVLRKLKTELNEVSKEGRVFEESDTGKCPYLNNVISETLRLFPAAPLLVPHASSTDCEVAGFDIPRRT…
AtCYP81H1	MDCILLILTTLVAIFIVKIVLLVTKPNKNLPPSPNICFPIIGHLHLLKKPLLHRTLSHLSHSLGPVFSLRLGSRLAVIISSPTAAEECFLTKNDIVLANRPRFIMGKYVAYDYTSMVTAPYGDHWRNLRRITALEVFSTNRLNASAEIRHDEVKMLLQKLHDLSVERPAKVELRQLLTGLTLNVIMRMMTGKRFFEEDDGGKAGISLEFRELVAEILELSAADNPADFLPALRWFDYKGLVKRAKRIGERMDSLLQGFLDEHRANKDRLEFKNTMIAHLLDSQEKEPHNYSDQTIKGLILMMVVGGTDTSALTVEWAMSNLLNHPQILETTRQNIDTQMETSSSRRLLKEEDLVNMNYLKNVVSETLRLYPVAPLMVPHVPSSDCVIGGFNVPRDTIVL…
AtCYP81K1	MEDLWFIFFSFLTATLIFFITKKFLWSLNSKLPPSPTPLPIIGHLHLIKKYPLPQALRHLSSNYGPVLFLKFGCRNVLTLSSPDSIEECFTNHDVTLANRPKTITSDHFSYGYKNFGFAPYGDLWRTLRRLSTLEVFSSASLQKNSSIRNEEVSNLCLIIFRLSRDSRIVDLKYQFTLLTAHIMLRLVSGKRGVKKSDPESEKRFLDDFKLRFFSSMSMNVCDYFPVLRWIGYKGLEKRVIDMQRMRDEYLQRLIDDIRMKNIDSSGSVVEKFLKLQESEPEFYADDVIKGIIVLMFNGGTDTSPVAMEWAVSLLLNHPDKLEKLREEIKSNVKHKGLIQDSDLSSLPYLRCVIYETLRLYPAAPLLLPHCSSKRFNLGNYEIPENIMLLVNAWAVHRD…
AtCYP81K2	MENLWVIFLLTATLTFFITKFLWSQNPKLPPSPTPLPIIGHLHLINKYPLPQALHHLSSNYGPVLFLKFGCREVLILSSPDSIEECFTNHDIALANRPKTITSDHFSYGYKNFGFAPYGDLWRTLRRLSTLEVFSSVSLQKNSSIRTEEVSNLCSSLFRFSGGNSCKVDLRYQFTLLTAHVMLRLVSGNRGVNESDSESETKFLDEFKSRFFSSLSSMNVCDYFPVLRWIGYKGLENRVIEIQRMRDEYLQRLIDDIRMKKFDSTGSVVEKFLKLQESEPEFYSDDVIKGIVVLMFNAGSDTSPVTMEWAMALLLNHPDKLDKVREEIKSNVKHKGIIQDSDLSSLPYLRCVIYETLRLHPAAPILPPHCSSKRFNLGNYEIPENTVLLVNAWAVHRDG…
AtCYP82C2	MDTSLFSLFVPILVFVFIALFKKSKKPKHVKAPAPSGAWPIIGHLHLLSGKEQLLYRTLGKMADQYGPAMSLRLGSSETFVVSSFEVAKDCFTVNDKALASRPITAAAKHMGYDCAVFGFAPYSAFWREMRKIATLELLSNRRLQMLKHVRVSEISMVMQDLYSLWVKKGGSEPVMVDLKSWLEDMSLNMMVRMVAGKRYFGGGSLSPEDAEEARQCRKGVANFFHLVGIFTVSDAFPKLGWFDFQGHEKEMKQTGRELDVILERWIENHRQQRKVSGTKHNDSDFVDVMLSLAEQGKFSHLQHDAITSIKSTCLALILGGSETSPSTLTWAISLLLNNKDMLKKAQDEIDIHVGRDRNVEDSDIENLVYIQAIIKETLRLYPAGPLLGHREAIEDCTV…
AtCYP82C3	MDTSLFSLFVSILVFVFIALFKKSKKPKYVKAPAPSGAWPIIGHLHLLGGKEQLLYRTLGKMADHYGPAMSLRLGSSETFVGSSFEVAKDCFTVNDKALASLMTAAAKHMGYVFWLEMRKIAMIELLSNRALQMLNNVRVSEISMGVKDLYSLWVKKGGSEPVMVDLKSWLEDMIANMIMRMVAGKRYFGGGGAESSEHTEEARQWRKGIAKFFHLVGIFTVSDAFPKLGWLDLQGHEKEMKQTRRELDVILERWIENHRQQRKVSGTKHNDSDFVDVMLSLAEQGKLSHLQYDANTCIKTTCLALILGGSETSPSTLTWAISLLLNNKDMLKKVQDEIDIHVGRDRNVEDSDIKNLVYLQAIIKETLRLYPAAPLLGHREAMEDCTVAGYNVPCGTRL…
AtCYP82C4	MDTSLFSLFVPILVFVFIALFKKSKKPKYVKAPAPSGAWPIIGHLHLLGGKEQLLYRTLGKMADHYGPAMSLQLGSNEAFVVSSFEVAKDCFTVNDKALASRPMTAAAKHMGYNFAVFGFAPYSAFWREMRKIATIELLSNRRLQMLKHVRVSEITMGVKDLYSLWFKNGGTKPVMVDLKSWLEDMTLNMIVRMVAGKRYFGGGGSVSSEDTEEAMQCKKAIAKFFHLIGIFTVSDAFPTLSFFDLQGHEKEMKQTGSELDVILERWIENHRQQRKFSGTKENDSDFIDVMMSLAEQGKLSHLQYDANTSIKSTCLALILGGSDTSASTLTWAISLLLNNKEMLKKAQDEIDIHVGRDRNVEDSDIENLVYLQAIIKETLRLYPAGPLLGPREAMEDCT…
AtCYP82F1	MDLIMLFLLSALFIFPVLILIKSRLRPKNKKSTAPMVPGAWPLLGHLHLFDTVNPTHVTFGAMADVYGPVFMAKLGSIKVMIINSKEVAKEIYTVHDKLLERPELTASKLLGYNDSFLTFSPYGLYWREIRKIAVSELFSTSGVDMHMVSRAREADLAFRALYVRWEKRGKPKEGVLVDMKQEFIDLTANISLMMVSGKRYFGENPNCEVKEARRCGKLIREFLDYFALFLLSDVAPVLGFLDWKTKRGMKRTAKGLDKVAEGWIEEHKNKRSDHGRSENDYLDILIKILGQDKIPGLSDTHTKIKALCLNLVLAGSETAIVVLVWAVSLLLNNPHVLRKAQEELDSKIGKERVVEELDIKDLVYLQAIVKETFRLYPPVPLVAYRAVVEDFDIAFCKC…
AtCYP82G1	MTFLFSTLQLSLFSLALVIFGYIFLRKQLSRCEVDSSTIPEPLGALPLFGHLHLLRGKKLLCKKLAAMSQKHGPIFSLKLGFYRLVVASDPKTVKDCFTTNDLATATRPNIAFGRYVGYNNASLTLAPYGDYWRELRKIVTVHLFSNHSIEMLGHIRSSEVNTLIKHLYKGNGGTSIVKIDMLFEFLTFNIILRKMVGKRIGFGEVNSDEWRYKEALKHCEYLAVIPMIGDVIPWLGWLDFAKNSQMKRLFKELDSVNTKWLHEHLKKRSRNEKDQERTIMDLLLDILPEDIVISGHALTLTGSDSTSITLTWAVSLLLNNPAALEAAQEEIDNSVGKGRWIEESDIQNLKYLQAIVKETHRLYPPAPLTGIREAREDCFVGGYRVEKGTRLLVNIWKL…
AtCYP83A1	MEDIIIGVVALAAVLLFFLYQKPKTKRYKLPPGPSPLPVIGNLLQLQKLNPQRFFAGWAKKYGPILSYRIGSRTMVVISSAELAKELLKTQDVNFADRPPHRGHEFISYGRRDMALNHYTPYYREIRKMGMNHLFSPTRVATFKHVREEEARRMMDKINKAADKSEVVDISELMLTFTNSVVCRQAFGKKYNEDGEEMKRFIKILYGTQSVLGKIFFSDFFPYCGFLDDLSGLTAYMKECFERQDTYIQEVVNETLDPKRVKPETESMIDLLMGIYKEQPFASEFTVDNVKAVILDIVVAGTDTAAAAVVWGMTYLMKYPQVLKKAQAEVREYMKEKGSTFVTEDDVKNLPYFRALVKETLRIEPVIPLLIPRACIQDTKIAGYDIPAGTTVNVNAWAV…
AtCYP83B1	MDLLLIIAGLVAAAAFFFLRSTTKKSLRLPPGPKGLPIIGNLHQMEKFNPQHFLFRLSKLYGPIFTMKIGGRRLAVISSAELAKELLKTQDLNFTARPLLKGQQTMSYQGRELGFGQYTAYYREMRKMCMVNLFSPNRVASFRPVREEECQRMMDKIYKAADQSGTVDLSELLLSFTNCVVCRQAFGKRYNEYGTEMKRFIDILYETQALLGTLFFSDLFPYFGFLDNLTGLSARLKKAFKELDTYLQELLDETLDPNRPKQETESFIDLLMQIYKDQPFSIKFTHENVKAMILDIVVPGTDTAAAVVVWAMTYLIKYPEAMKKAQDEVRSVIGDKGYVSEEDIPNLPYLKAVIKESLRLEPVIPILLHRETIADAKIGGYDIPAKTIIQVNAWAVSRD…
AtCYP84A1	MESSISQTLSKLSDPTTSLVIVVSLFIFISFITRRRRPPYPPGPRGWPIIGNMLMMDQLTHRGLANLAKKYGGLCHLRMGFLHMYAVSSPEVARQVLQVQDSVFSNRPATIAISYLTYDRADMAFAHYGPFWRQMRKVCVMKVFSRKRAESWASVRDEVDKMVRSVSCNVGKPINVGEQIFALTRNITYRAAFGSACEKGQDEFIRILQEFSKLFGAFNVADFIPYFGWIDPQGINKRLVKARNDLDGFIDDIIDEHMKKKENQNAVDDGDVVDTDMVDDLLAFYSEEAKLVSETADLQNSIKLTRDNIKAIIMDVMFGGTETVASAIEWALTELLRSPEDLKRVQQELAEVVGLDRRVEESDIEKLTYLKCTLKETLRMHPPIPLLLHETAEDTSIDG…
AtCYP84A4	MLTLMTLIVLVPLLLFLFPHLLLRRQMLLKPYPPGPKGLPVIGNILMMNQFNHRGLAKLSRIYGGLLHLRLGFSHIFVVSSPDIARQVLQVQDHVFSNRPTTIAIRYLTYGGSDLAFCNYGPFWRRMRKLYVMMLFSRKRAESWVSVDEEVHKSVRLVASNVGKPLNICKLAFSLSRDITFRAAFGSSSSTSDESRLDEFLEIIQEFSKLFGEFNVADYVPSWLSWIDPQGINGRVEKARKSLDGFIESVIDDHLHKKKREHDNVDEETDMVDQLLAFYEEEVKVNNSVTKINLDNIKGIIMDVMFGGTETVALAIEWVLTEILRSPENMKRVQDELTSVVGLDRWRVEDTHLEKLTFLKCILKETLRLHPPFPLLLHETVKDTEISGYFIPKGSRVMV…
AtCYP85A1	MGAMMVMMGLLLIIVSLCSALLRWNQMRYTKNGLPPGTMGWPIFGETTEFLKQGPNFMRNQRLRYGSFFKSHLLGCPTLISMDSEVNRYILKNESKGLVPGYPQSMLDILGTCNMAAVHGSSHRLMRGSLLSLISSTMMRDHILPKVDHFMRSYLDQWNELEVIDIQDKTKHMAFLSSLTQIAGNLRKPFVEEFKTAFFKLVVGTLSVPIDLPGTNYRCGIQARNNIDRLLRELMQERRDSGETFTDMLGYLMKKEGNRYPLTDEEIRDQVVTILYSGYETVSTTSMMALKYLHDHPKALQELRAEHLAFRERKRQDEPLGLEDVKSMKFTRAVIYETSRLATIVNGVLRKTTRDLEINGGYLIPKGWRIYVYTREINYDANLYEDPLIFNPWRWMKKS…
AtCYP85A2	MMMILGLLVIIVCLCTALLRWNQMRYSKKGLPPGTMGWPIFGETTEFLKQGPDFMKNQRLRYGSFFKSHILGCPTIVSMDAELNRYILMNESKGLVAGYPQSMLDILGTCNIAAVHGPSHRLMRGSLLSLISPTMMKDHLLPKIDDFMRNYLCGWDDLETVDIQEKTKHMAFLSSLLQIAETLKKPEVEEYRTEFFKLVVGTLSVPIDIPGTNYRSGVQARNNIDRLLTELMQERKESGETFTDMLGYLMKKEDNRYLLTDKEIRDQVVTILYSGYETVSTTSMMALKYLHDHPKALEELRREHLAIRERKRPDEPLTLDDIKSMKFTRAVIFETSRLATIVNGVLRKTTHDLELNGYLIPKGWRIYVYTREINYDTSLYEDPMIFNPWRWMEKSLESK…
AtCYP86A1	MEALNSILTGYAVAALSVYALWFYFLSRRLTGPKVLPFVGSLPYLIANRSRIHDWIADNLRATGGTYQTCTMVIPFVAKAQGFYTVTCHPKNVEHILKTRFDNYPKGPMWRAAFHDLLGQGIFNSDGDTWLMQRKTAALEFTTRTLRQAMARWVNGTIKNRLWLILDRAVQNNKPVDLQDLFLRLTFDNICGLTFGKDPETLSLDLPDNPFSVAFDTATEATLKRLLYTGFLWRIQKAMGIGSEDKLKKSLEVVETYMNDAIDARKNSPSDDLLSRFLKKRDVNGNVLPTDVLQRIALNFVLAGRDTSSVALSWFFWLVMNNREVETKIVNELSMVLKETRGNDQEKWTEEPLEFDEADRLVYLKAALAETLRLYPSVPQDFKYVVEHDVLPDGTFVPR…
AtCYP86A2	MDVSNTMLLVAVVAAYWLWFQRISRWLKGPRVWPVLGSLPGLIEQRDRMHDWITENLRACGGTYQTCICAVPFLAKKQGLVTVTCDPKNIEHMLKTRFDNYPKGPTWQAVFHDFLGQGIFNSDGDTWLFQRKTAALEFTTRTLRQAMGRWVNRGIKLRFCPILETAQNNYEPVDLQDLILRLTFDNICGLAFGKDTRTCAPGLPENGFASAFDRATEASLQRFILPEFLWRLKKWLGLGLEVSLSRSLGEIDGYLDAVINTRKQELLSQRESGVQRHDDLLSRFMKKKDQSYSETFLRHVALNFILAGRDTSSVALSWFFWLITTHPTVEDKIVREICSVLIETRGTDVSSWTAEPLEFDEVDRLVYLKAALSETLRLYPSVPEDSKHVVNDDILPDGT…
AtCYP86A4	MEISNAMLLVAIVTGYWLWFKRISRWLKGPRVWPLLGSLPGLIEQRDRMHEWITENLRACGGTYQTCIFAVPFLAKKQGLVTVTCDPKNLEHMLKTRFDNYPKGPTWQSVFHDLLGQGIFNSDGDTWLFQRKTAALEFTTRTLRQAMGRWVNRGIKLRFCPILATAQDNAEPVDLQDLILRLTFDNICGLAFGKDTRTCAPGLPENGFASAFDRATEASLQRFIIPKFMWKLKKWLGLGLEVSLSRSLGEIDEYLAAVINTRKQELMSQQESGTHQRHDDLLSRFMMKKTESYSDTFLQHVALNFILAGRDTSSVALSWFFWLITMHPTVEDKIVREICSVLIETRGTDDVASWTEEPLGFDEIDRLVYLKAAISETLRLYPSVPEDSKHVENDDVLPD…
AtCYP86A7	MDGSTAAIILTLIVTYIIWFVSLRRSYKGPRVWPLVGSLPALITNAHRMHDFIADNLRMCGGTYQTCIFPIPFLAKKQGHVTVTCDPKNLEHILKTRFDNYPKGPSWQSVFHDLLGDGIFNSDGDTWRFQRKTAALEFTTRTLRQAMARWVDRAIKNRLVPILESARSRAEPIDLQDVLLRLTFDNICGLTFGKDPRTLSPEFPENGFAVAFDGATEATLQRFIMPEFIWKIRKWLRLGLEDDMSRSISHVDNYLSEIINTRKLELLGQQQDESRHDDLLSRFMKKKESYSDKYLKYVALNFILAGRDTSSVAMSWFFWLVSLNPRVEEKIINEICTILIKTRDTNVSKWTDEPLTFDEIDQLVYLKAALSETLRLYPSVPEDSKFVVANDVLPDGTFV…
AtCYP86A8	MEISTALMILSAITAYFLWLTFISRCLKGPRVWPILGSLPGLIENCERMHDWISDNLRACSGTYQTCICAIPFLAKKQGLVTVTCDPRNLEHILKNRFDNYPKGPTWQAVFHDLLGQGIFNSDGDTWLFQRKTAALEFTTRTLRQAMARWVNRAIKLRFLPILENARLGSEPIDLQDLLLRLTFDNICGLTFGKDPRTCAPGLPVNTFAVAFDRATEASLQRFILPEILWKFKRWLRLGLEVSLTRSLVQVDNYLSEIITTRKEEMMTQHNNGKHHDDLLSRFIKKKESYSDETLQRVALNFILAGRDTSSVALSWFFWLITQHPAIEDKILREICTVLVETRGDDVALWTDEPLSCEELDRLVFLKAALSETLRLYPSVPEDSKRAVKDDVLPDGTFV…
AtCYP86B1	MNFNSSYNLTFNDVFFSSSSSSDPLVSRRLFLLRDVQILELLIAIFVFVAIHALRQKKYQGLPVWPFLGMLPSLAFGLRGNIYEWLSDVLCLQNGTFQFRGPWFSSLNSTITCDPRNVEHLLKNRFSVFPKGSYFRDNLRDLLGDGIFNADDETWQRQRKTASIEFHSAKFRQLTTQSLFELVHKRLLPVLETSVKSSSPIDLQDVLLRLTFDNVCMIAFGVDPGCLGPDQPVIPFAKAFEDATEAAVVRFVMPTCVWKFMRYLDIGTEKKLKESIKGVDDFADEVIRTRKKELSLEGETTKRSDLLTVFMGLRDEKGESFSDKFLRDICVNFILAGRDTSSVALSWFFWLLEKNPEVEEKIMVEMCKILRQRDDHGNAEKSDYEPVFGPEEIKKMDYL…
AtCYP86B2	MNLSFSSYNLTATAVSSSCFGSDELLVSRRLFSLRDVQILELFIAFFVFATIHSLRQKKHQGMPVWPLVGMLPSLISAVRSNIYEWLSDVLISQNGTFRFRGPWFSTLNCVVTCDPRNVEHLLKTRFSIYPKGSYFRETMQDLLGDGIFNTDDGTWQRQRKAASVEFHSAKFRQLTSQSLHELVHNRLLPVLETSGKIDLQDILLRLTFDNVCMIAFGVDPGCLSPKLPEIPFAKAFEDATEATVVRFVMPKFVWKLMRSLNLGTEKKLKESINGVDDFAEEVIRTRKKEMSLETEIAKRPDLLTIFMGLRDENGQKFSDKFLRDICVNFILAGRDTSSVALSWFFWLIEKNPEVEEKIMMGICKILEQRVDHGDTKKNMEYEPVFRPEEIKKMDYLQA…
AtCYP86C1	MNVLISAVVWVYTHLRLSDVALALVGLFLLSYLREKLVSKGGPVMWPVLGIIPMLALNKHDLFTWCTRCVVRSGGTFHYRGIWFGGAYGIMTADPANVEHILKTNFKNYPKGAFYRERFRDLLEDGIFNADDELWKEERRVAKTEMHSSRFLEHTFTTMRDLVDQKLVPLMENLSTSKRVFDLQDLLLRFTFDNICISAFGVYPGSLETGLPEIPFAKAFEDATEYTLARFLIPPFVWKPMRFLGIGYERKLNNAVRIVHAFANKTVRERRNKMRKLGNLNDYADLLSRLMQREYEKEEDTTRGNYFSDKYFREFCTSFIIAGRDTTSVALVWFFWLVQKHPEVEKRILREIREIKRKLTTQETEDQFEAEDFREMVYLQAALTESLRLYPSVPMEMKQ…
AtCYP86C2	MSLIDRISGHLCLQDVSIALLGLFLFGCLQAKLTNKGEPVQWPVFGITPEFFLHVHDMFGWVTRCLTKSRGTFPYQGIWFSGSYGAMTSVPANIEYMLKTNFKNFPKGEFYKERFRDLLEDGIFNADDESWKEQRRIIITEMHSTRFVDHSFQTTRDLIERKLLKVMESFSKSQEAFDLQEILLRLTFDNICIAGLGDDPGTLDDDLPHVPFAKAFEEATESTLFRFMIPPFVWKPMKFFDIGYEKGLREAVETVHNFIDKMVVERIAMLKDQGTLANSKSDVLSRLIQIESHKRGDENDRFTAKFFRQFCTSFILAGRDTSSVALTWFFWLITKHPEVETKILHEIREILNQREKNKYKLDETGEKESSRHFTVKELNDMVYLQAALSESLRLYPPIP…
AtCYP86C3	MPLTERVYNHLCLSDVSLALLGLFVFCCVREKVTKKLGPTIWPVFGITPEFFFHRNDVYGWATRCLKKCRGTFLYNGIWLGGSYGAVTCVPANVEYMLKTNFKNFPKGAFFKERFNDLLEDGIFNADAESWKEQRRIIITEMHSTRFVEHSFQTTQDLVRKKLLKVMESFARSQEAFDLQDVLLRLTFDNICIAGLGDDPGTLDSDLPLVPFAQAFEEATESTMFRFMIPPFIWKPLKFFDIGYEKGLRKAVDVLHEFVDKMVVDRICKLKEEGTLGNRSDVLSRIIEIESHKTTDEKDPSTIKFFRQFCTSFILAGRDTSSVALTWFFWVIQKHPEVENKIIREISEILRQRGDSPTSKNESLFTVKELNDMVYLQAALSETMRLYPPIPMEMKQAIE…
AtCYP86C4	MSLTERLYNHLSLFDLLLSLLGLFVFCCLREKLTNKRGPMLWPVFGITLEFFFHINDVYGWVTRSLKKCRGTFLYRGVWLDGSYGAVTCVPANVEYMLKTNFKNFPKGTFFKSRFNDLLEEGIFNADDDSWKEQRRIIITEMHSTGFVEHSFQTTQHLVRKKLLKVMESFAKSQEAFDLQDVFLRLTFDIICLAGLGADPETLAVDLPQVPFAKAFEEATESTLFRFMIPPFIWKPMRFLDTGYEKGLRIAVGVVHGFVDKMIVDRICELKEEETLDNRSDVLSRIIQIESHKRENEIDPSTIRFFRQFCTSFILAGRDTSSVALSWFCWVIQKHPEVENKIICEIREILRQRGDSPTSKNESLFTVKELNNMVYLQAALSETLRLFPPIPMEMKQAIE…
AtCYP87A2	MWALLIWVSLLLISITHWVYSWRNPKCRGKLPPGSMGFPLLGESIQFFKPNKTSDIPPFIKERVKKYGPIFKTNLVGRPVIVSTDADLSYFVFNQEGRCFQSWYPDTFTHIFGKKNVGSLHGFMYKYLKNMVLTLFGHDGLKKMLPQVEMTANKRLELWSNQDSVELKDATASMIFDLTAKKLISHDPDKSSENLRANFVAFIQGLISFPFDIPGTAYHKCLQGRAKAMKMLRNMLQERRENPRKNPSDFFDYVIEEIQKEGTILTEEIALDLMFVLLFASFETTSLALTLAIKFLSDDPEVLKRLTEEHETILRNREDADSGLTWEEYKSMTYTFQFINETARLANIVPAIFRKALRDIKFKDYTIPAGWAVMVCPPAVHLNPEMYKDPLVFNPSRWE…
AtCYP88A3	MAETTSWIPVWFPLMVLGCFGLNWLVRKVNVWLYESSLGENRHYLPPGDLGWPFIGNMLSFLRAFKTSDPDSFTRTLIKRYGPKGIYKAHMFGNPSIIVTTSDTCRRVLTDDDAFKPGWPTSTMELIGRKSFVGISFEEHKRLRRLTAAPVNGHEALSTYIPYIEENVITVLDKWTKMGEFEFLTHLRKLTFRIIMYIFLSSESENVMDALEREYTALNYGVRAMAVNIPGFAYHRALKARKTLVAAFQSIVTERRNQRKQNILSNKKDMLDNLLNVKDEDGKTLDDEEIIDVLLMYLNAGHESSGHTIMWATVFLQEHPEVLQRAKAEQEMILKSRPEGQKGLSLKETRKMEFLSQVVDETLRVITFSLTAFREAKTDVEMNGYLIPKGWKVLTWFRD…
AtCYP88A4	MTETGLILMWFPLIILGLFVLKWVLKRVNVWIYVSKLGEKKHYLPPGDLGWPVIGNMWSFLRAFKTSDPESFIQSYITRYGRTGIYKAHMFGYPCVLVTTPETCRRVLTDDDAFHIGWPKSTMKLIGRKSFVGISFEEHKRLRRLTSAPVNGPEALSVYIQFIEETVNTDLEKWSKMGEIEFLSHLRKLTFKVIMYIFLSSESEHVMDSLEREYTNLNYGVRAMGINLPGFAYHRALKARKKLVAAFQSIVTNRRNQRKQNISSNRKDMLDNLIDVKDENGRVLDDEEIIDLLLMYLNAGHESSGHLTMWATILMQEHPMILQKAKEEQERIVKKRAPGQKLTLKETREMVYLSQVIDETLRVITFSLTAFREAKSDVQMDGYIIPKGWKVLTWFRNVH…
AtCYP89A2	MEIWLLILASLSGSLLLHLLLRRRNSSSPPLPPDPNFLPFLGTLQWLREGLGGLESYLRSVHHRLGPIVTLRITSRPAIFVADRSLTHEALVLNGAVYADRPPPAVISKIVDEHNISSGSYGATWRLLRRNITSEILHPSRVRSYSHARHWVLEILFERFRNHGGEEPIVLIHHLHYAMFALLVLMCFGDKLDEKQIKEVEFIQRLQLLSLTKFNIFNIWPKFTKLILRKRWQEFLQIRRQQRDVLLPLIRARRKIVEERKRSEQEDKKDYVQSYVDTLLDLELPEENRKLNEEDIMNLCSEFLTAGTDTTATALQWIMANLVKYPEIQERLHEEIKSVVGEEAKEVEEEDVEKMPYLKAVVLEGLRRHPPGHFLLPHSVTEDTVLGGYKVPKNGTINF…
AtCYP89A3	MATWFHIFCVSFTVNFLLYLFFRRTNNNLPLPPNPNFFPMPGPFQWLRQGFDDFYSYLRSIHHRLGPIISLRIFSVPAIFVSDRSLAHKALVLNGAVFSDRPPALPTGKIITSNQHTISSGSYGATWRLLRRNLTSEILHPSRVKSYSNARRSVLENLCSRIRNHGEEAKPIVVVDHLRYAMFSLLVLMCFGDKLDEEQIKQVEFVQRRELITLPRFNILNVFPSFTKLFLRKRWEEFLTFRREHKNVLLPLIRSRRKIMIESKDSGKEYIQSYVDTLLDLELPDEKRKLNEDEIVSLCSEFLNAGTDTTATTLQWIMANLXRNQEIQKRLYEEIKSVIGEEEEKEIEEEEMKKMPYLKAVVLEGLRLHPPGHLLLPHRVSEDTELGGYRVPKKGTFNI…
AtCYP89A4	MEIWLLILGSLFLSLLLNLLLFRRRDSSSLPLPPDPNFFPFLGTLQWLRQGLGGLNNYLRSVHHRLGPIITLRITSRPAIFVADRSLAHQALVLNGAVFADRPPAAPISKIISSNQHNISSSLYGATWRLLRRNLTSEILHPSRVRSYSHARRWVLEILFDRFGKSRGEEPIVVVDHLHYAMFALLVLMCFGDKLDEKQIKQVEYVQRRQLLGFSRFNILNLWPKFTKLILRKRWEEFFQMRREQHDVLLPLIRARRKIVEERKNRSSEEEEDNKVYVQSYVDTLLELELPDEKRKLNEDEIVSLCSEFLNGGTDTTATALQWIMANLVKNPEIQKRLYEEIKSVVGEEAKEVEEEDAQKMPYLKAVVMEGLRRHPPGHFVLPHSVTEDTVLGGYKVPK…
AtCYP89A5	MEIWLLILGSLFLSLLLNLLFFRLRDSSSLPLPPDPNYFPFIGTIQWLRQGLGGLNNYLRSVHHRLGPIITLRITSRPSIFVADRSLAHQALVLNGAVFADRPPAAPISKIISSNQHNISSCLYGATWRLLRRNLTSEILHPSRVRSYSHARRWVLEILFDRFGKNRGEEPIVVVDHLHYAMFALLVLMCFGDKLDEKQIKQVEYVQRRQLLGFSRFNILNLWPKFTKLILRKRWEEFFQMRREQHDVLLPLIRARRKIVEERKNRSSEEEEDNKEYVQSYVDTLLELELPDEKRKLNEDEIVSLCSEFLNGGTDTTATALQWIMANLVKNPDIQKRLYEEIKSVVGEEANEVEEEDAQKMPYLEAVVMEGLRRHPPGHFVLPHSVTEDTVLGGYKVPK…
AtCYP89A6	MEIWLLILGSLFLSLLVNHLLFRRRDSFSSLPLPPDPNFFPFIGTLKWLRKGLGGLDNYLRSVHHHLGPIITLRITSRPAIFVTDRSLAHQALVLNGAVFADRPPAESISKIISSNQHNISSCLYGATWRLLRRNLTSEILHPSRLRSYSHARRWVLEILFGRFGKNRGEEPIVVVDHLHYAMFALLVLMCFGDKLDEKQIKQVEYVQRRQLLGFSRFNILTLWPKFTKLIYRKRWEEFFQMQSEQQDVLLPLIRARRKIVDERKKRSSEEEKDNKEYVQSYVDTLLDVELPDEKRKLNEDEIVSLCSEFLNAGTDTTATALQWIMANLVKNPEIQRRLYEEIKSIVGEEAKEVEEQDAQKMPYLKAVVMEGLRRHPPGHFVLPHSVTEDTVLGGYKVP…
AtCYP89A7	MEIWLLILGSLSLSLLLNLLFFRLRDSSSLPLPPAPNFFPFLGTLQWLRQGLGGFNNYVRSVHHRLGPIITLRITSRPAIFVADGSLAHQALVLNGAVFADRPPAAPISKILSNNQHTITSCLYGVTWRLLRRNITEILHPSRMKSYSHVRHWVLEILFDRLRKSGGEEPIVVFDHLHYAMFAVLVLMCFGDKLDEKQIKQVEYVQRQMLLGFARYSILNLCPKFTKLILRKRWEEFFQMRREQQDVLLRLIYARRKIVEERKKRSSEEEEENKEYVQSYVDTLLDVELPDEKRKLNEDEIVSLCSEFLIAGSDTTATVLQWIMANLVKNQEIQERLYEEITNVVGEEAKVVEEKDTQKMPYLKAVVMEALRRHPPGNTVLPHSVTEDTVLGGYKVPKK…
AtCYP89A9	MEITTIIFLIISSLTFSIFLKLIFFFSTHKLPPGPPRFPVIGNIIWLKKNNFSDFQGVLRDLASRHGPIITLHVGSKPSIWVTDRSLAHQALVQNGAVFSDRSLALPTTKVITSNQHDIHSSVYGSLWRTLRRNLTSEILQPSRVKAHAPSRKWSLEILVDLFETEQREKGHISDALDHLRHAMFYLLALMCFGEKLRKEEIREIEEAQYQMLISYTKFSVLNIFPSVTKFLLRRKWKEFLELRKSQESVILRYVNARSKETTGDVLCYVDTLLNLEIPTEEKEGGKKRKLSDSEIVSLCSEFLNAATDPTATSMQWIMAIMVKYPEIQRKVYEEMKTVFAGEEEEREEIREEDLGKLSYLKAVILECLRRHPPGHYLSYHKVTHDTVLGGFLIPRQGT…
AtCYP90A1	MAFTAFLLLLSSIAAGFLLLLRRTRYRRMGLPPGSLGLPLIGETFQLIGAYKTENPEPFIDERVARYGSVFMTHLFGEPTIFSADPETNRFVLQNEGKLFECSYPASICNLLGKHSLLLMKGSLHKRMHSLTMSFANSSIIKDHLMLDIDRLVRFNLDSWSSRVLLMEEAKKITFELTVKQLMSFDPGEWSESLRKEYLLVIEGFFSLPLPLFSTTYRKAIQARRKVAEALTVVVMKRREEEEEGAERKKDMLAALLAADDGFSDEEIVDFLVALLVAGYETTSTIMTLAVKFLTETPLALAQLKEEHEKIRAMKSDSYSLEWSDYKSMPFTQCVVNETLRVANIIGGVFRRAMTDVEIKGYKIPKGWKVFSSFRAVHLDPNHFKDARTFNPWRWQSNS…
AtCYP90B1	MFETEHHTLLPLLLLPSLLSLLLFLILLKRRNRKTRFNLPPGKSGWPFLGETIGYLKPYTATTLGDFMQQHVSKYGKIYRSNLFGEPTIVSADAGLNRFILQNEGRLFECSYPRSIGGILGKWSMLVLVGDMHRDMRSISLNFLSHARLRTILLKDVERHTLFVLDSWQQNSIFSAQDEAKKFTFNLMAKHIMSMDPGEEETEQLKKEYVTFMKGVVSAPLNLPGTAYHKALQSRATILKFIERKMEERKLDIKEEDQEEEEVKTEDEAEMSKSDHVRKQRTDDDLLGWVLKHSNLSTEQILDLILSLLFAGHETSSVAIALAIFFLQACPKAVEELREEHLEIARAKKELGESELNWDDYKKMDFTQCVINETLRLGNVVRFLHRKALKDVRYKGYDI…
AtCYP90C1	MQPPASAGLFRSPENLPWPYNYMDYLVAGFLVLTAGILLRPWLWLRLRNSKTKDGDEEEDNEEKKKGMIPNGSLGWPVIGETLNFIACGYSSRPVTFMDKRKSLYGKVFKTNIIGTPIIISTDAEVNKVVLQNHGNTFVPAYPKSITELLGENSILSINGPHQKRLHTLIGAFLRSPHLKDRITRDIEASVVLTLASWAQLPLVHVQDEIKKMTFEILVKVLMSTSPGEDMNILKLEFEEFIKGLICIPIKFPGTRLYKSLKAKERLIKMVKKVVEERQVAMTTTSPANDVVDVLLRDGGDSEKQSQPSDFVSGKIVEMMIPGEETMPTAMTLAVKFLSDNPVALAKLVEENMEMKRRKLELGEEYKWTDYMSLSFTQNVINETLRMANIINGVWRKAL…
AtCYP90D1	MDTSSSLLFFSFFFFIIIVIFNKINGLRSSPASKKKLNDHHVTSQSHGPKFPHGSLGWPVIGETIEFVSSAYSDRPESFMDKRRLMYGRVFKSHIFGTATIVSTDAEVNRAVLQSDSTAFVPFYPKTVRELMGKSSILLINGSLHRRFHGLVGSFLKSPLLKAQIVRDMHKFLSESMDLWSEDQPVLLQDVSKTVAFKVLAKALISVEKGEDLEELKREFENFISGLMSLPINFPGTQLHRSLQAKKNMVKQVERIIEGKIRKTKNKEEDDVIAKDVVDVLLKDSSEHLTHNLIANNMIDMMIPGHDSVPVLITLAVKFLSDSPAALNLLTEENMKLKSLKELTGEPLYWNDYLSLPFTQKVITETLRMGNVIIGVMRKAMKDVEIKGYVIPKGWCFLA…
AtCYP93D1	MVDLQYFSVIILVCLGITVLIQAITNRLRDRLPLPPSPTALPIIGHIHLLGPIAHQALHKLSIRYGPLMYLFIGSIPNLIVSSAEMANEILKSNELNFLNRPTMQNVDYLTYGSADFFSAPYGLHWKFMKRICMVELFSSRALDSFVSVRSEELKKLLIRVLKKAEAEESVNLGEQLKELTSNIITRMMFRKMQSDSDGGEKSEEVIKMVVELNELAGFFNVSETFWFLKRLDLQGLKKRLKNARDKYDVIIERIMEEHESSKKNATGERNMLDVLLDIYEDKNAEMKLTRENIKAFIMNIYGGGTDTSAITVEWALAELINHPEIMKKAQQEIEQVVGNKRVVEESDLCNLSYTQAVVKETMRLHPGGPIFVRESDEECAVAGFRIPAKTRVIVNVWA…
AtCYP94B1	MEMLNAIILILFPIIGFVLIFSFPTKTLKAKTASPSNPTSYQLIGSILSFNKNRHRLLQWYTDLLRLSPSQTITVDLLFGRRTIITANPENVEHILKTNFYNFPKGKPFTDLLGDLLGGGIFNSDGELWSSQRKLASHEFTMRSLREFTFEILREEVQNRLIPVLSSAVDCGETVDFQEVLKRFAFDVVCKVSLGWDPDCLDLTRPVPELVKAFDVAAEISARRATEPVYAVWKVKRFLNVGSEKRLREAIKTVHLSVSEIIRAKKKSLDIGGDVSDKQDLLSRFLAAGHGEEAVRDSVISFIMAGRDTTSAAMTWLFWLLSQNDDVETKILDELRNKGSLGLGFEDLREMSYTKACLCEAMRLYPPVAWDSKHAANDDILPDGTPLKKGDKVTYFPYG…
AtCYP94B2	MEASTFILLLVLVLLLVSAGKHVIYSCRNSTPKTYPVIGCLISFYTNRNRLLDWYTELLTESPSRTVVIRRLAARRTVVTANPSNVEYILKTNFDNYPKGKPFTEILGDFLGNGIFNVDGNLWLKQRRLATHDFTPKSLREYVTVLRNEVEKELLAFLNAAAEDSQPFDLQELLRRFTFNIVCIVFLGIDRCTLNPSSPVSEFDRAFQTASAVSAGRGSAPLSFVWKFKRLVGFGSEKELRKAVGEVHNCVDEIIRDKKRKPANQDFLSRLIVAGESDETVRDMVISIIMAGRDTTSAVATRLFWLITGHEETEHDLVSEIRSVKEEITGGFDYESLKKLSLLKACLCEVMRLYPPVPWDSKHALTDDRLPDGTLVRAGDRVTYFPYGMGRMEELWGED…
AtCYP94B3	MAFLLSFLILAFLITIIFFLSSSSTKKVQENTTYGPPSYPLIGSILSFNKNRHRLLQWYTELLRLSPSQTILVPLLGNRRTIITTNPLNVEYILKTNFFNFPKGKPFTDLLGDLLGGGIFNVDGHSWSSQRKLASHEFSTRSLRSFAFEVLKDEVENRLVPVLSTAADVGTTVDLQDVLKRFAFDVVCKVSLGWDPDCLDLTRPVNPLVEAFDTAAEISARRATEPIYAVWKTKRVLNVGSERKLREAIRTVHVLVSEIVRAKKKSLEIGTGAEAKQDLLSRFLAAGHNGEAVRDMVISFIMAGRDTTSAAMTWLFWLLTENDDVERKILEEVDPLVSLGLGFEDLKEMAYTKACLCEAMRLYPPVSWDSKHAANDDVLPDGTRVKRGDKVTYFPYGMG…
AtCYP94C1	MLLIISFTIVSFFFIIIFSLFHLLFLQKLRYCNCEICHAYLTSSWKKDFINLSDWYTHLLRRSPTSTIKVHVLNSVITANPSNVEHILKTNFHNYPKGKQFSVILGDLLGRGIFNSDGDTWRFQRKLASLELGSVSVRVFAHEIVKTEIETRLLPILTSFSDNPGSVLDLQDVFRRFSFDTISKLSFGFDPDCLRLPFPISEFAVAFDTASLLSAKRALAPFPLLWKTKRLLRIGSEKKLQESINVINRLAGDLIKQRRLTGLMGKNDLISRFMAVVAEDDDEYLRDIVVSFLLAGRDTVAAGLTGFFWLLTRHPEVENRIREELDRVMGTGFDSVTARCDEMREMDYLHASLYESMRLFPPVQFDSKFALNDDVLSDGTFVNSGTRVTYHAYAMGRMD…
AtCYP94D1	MALLIFIFLLCFPISIFFIFFTKKSSSEFGFKSYPIVGSFPGLVNNRHRFLDWTVETLSRCPTQTAIFRRPGKQQLIMTANPSNVEYMLKTKFESFPKGQQFTSVLEDFLGHGIFNSDGDMWWKQRKTASYEFSTKSLRDFVMSNVTVEINTRLVPVLVEAATTGKLIDLQDILERFAFDNICKLAFNVDCACLGHDGAVGVNFMRAFETAATIISQRFRSVASCAWRIKKKLNIGSERVLRESIATVHKFADEIVRNRIDQGRSSDHKEDLLSRFISKEEMNSPEILRDIVISFILAGRDTTSSALSWFFWLLSMHPEVEDKILQELNSIRARTGKRIGEVYGFEHLKMMNYLHAAITESLRLYPPVPVDIKSCAEDNVLPDGTFVGKGWAITYNIFA…
AtCYP94D2	MEHFILISLLCFPIVIFFIFFPKNSSSEFGFKSYPIVGSLPGLVNNRHRFLDWTVETLSRCPTQTAIFRRPGKLQFVMTANPANVEYMLKTKFESFPKGERFISILEDFLGRGIFNSDGEMWWKQRKTASYEFSTKSLRDFVMSNVTVEINTRLVPVLAEAATNGKLIDLQDILERFAFDNICKLAFNVDSACLGDDGAAGVNFMQAFETAATIISQRFQSVISYSWKIKKKLNIGSERVLRESIMIVHKFADEIVRNRIEQGKVSDHKEDLLSRFISKEEMNSPEILRDIVISFILAGRDTTSSALSWFFWLLSMHPEVKDKILQELNSIRERTGKRIGEVYGFEDLKLMNYLHAAITESLRLYPPVPVDTMSCAEDNVLPDGTFIGKDWGISYNAYA…
AtCYP96A1	MALITLLEVSISLLFFSFLYGYFLISKKPHRSFLTNWPFLGMLPGLLVEIPRVYDFVTELLEASNLTYPFKGPCFGGLDMLITVDPANIHHIMSSNFANYPKGTEFKKIFDVLGDGIFNADSELWKDLRKSAQSMMTHQDFQRFTLRTIMSKLEKGLVPLLDYVAEKKQVVDLQDVFQRFTFDTSFVLATGVDPGCLSTEMPQIEFARALDEAEEAIFFRHVKPEIVWKMQRFIGFGDELKMKKAHSTFDRVCSKCIASKRDEITNGVINIDSSSKDLLMCYMNVDTICHTTKYKLLNPSDDKFLRDMILSFMLAGRDTTSSALTWFFWLLSKNPKAITKIRQEINTQLSPRTNDFDSFNAQELNKLVYVHGALCEALRLYPPVPFQHKSPTKSDVLPS…
AtCYP96A10	MVFISLFEISIAFFCFLLFRHFLINKKTHRLCPTNWPFFGMIPGLLVEIHRVYDFITEILEVTNLTYPCTGPCFANLDMLVTVDPANIHHIMSSNFANYPKGPEFKKLFDILGDGIFNADSELWKDLRKSAQSMMMNPEFQKFSLATSLKKLEKGLVPLLDHVAKEKLAVDLQDMFQRFTFDTTFVLATGYDPGCLSVEMPEVEFARALDDAEEAIFFRHVKPEIFWRLQGLLGLGDEKKMTKARSTLDRVCSKYIAIKRDEVSRGTNNVDSHSKDLLTSYMNLDTTKYKLLNPSDERFLRDTILTFMLAGRDTTGSGLTWFFWLLIKNPEVIAKIRQEINTALFQRSKVDDDASNNNDSDSFSPQELKKLVYLHGAICESLRLYPPVPFQHKSPTKPD…
AtCYP96A11	MASSISFLEASVAIFCFLILHYLFKTTTYNGRFPRNWPVLGMLPCLLVVLHRIYDYIVEILEISDLTFSFKGPWFAGMDTLLTVDPANIHHMMNSNFSNYIKGSDFKEVFDVFGDGIITTDSELWKNLRKSYQEMLHHQAFQSFSLSTTRSKLKDGLVPLLNHFAEEGTTVDLQDVLGRFTFDTILILITGSDPRSLSIEMHEDELAKALDVVGEGIFFRHVKPKFLWKLQNWMGFGHEKKMIEANATFDRVCAKYISDKRGEIIRSQRFSDISYGEPEDLLSSFMKLDTTKYNLLNPSDDKFLRDTILAFILAGRDTTASALTWFFWLLSENAQVVSKIRQEIINTNPSKNGNGQENLDKLVYLHGALCEAMRLYPPVSFGRKSPIKSDVLPSGHKVQ…
AtCYP96A12	MASVSLLDVAIAIICLFFFYYMYFKKPHGQVFRNWPVIGMLPGFLMVLHRIYNFGVEALEMSHLTFLFKGPWFAEMDMLFTVDPANIHYILSSNFSNYTKGADFKEVFDVFGEMIFSSDSELWKNQRKAAQFMLNHQGFQKLSLSATRSKLYDGLVPLFNQCCEEEKVVDLQQVFQRFTFDTTFFIVTGFDPKSLSIEMPEVEYAKALDDLGEGIFYRHIKPKFFWKLQNRFGLGQEKRMTEADATFDRVSAKYILAKREEIRSQGIDHHANGESEDLLTSHIKLDTTKYELLNPSDDKFLRDTILAFNLAGRDTTSSALSWFFWLLSENPQVVTKIRKEIIDKNISKDGRNGQENLDKLVYLHAALYESMRLYPPVAFQRKSPIKPDVLPSGHKVEAN…
AtCYP96A13	MASISLFEASIAIFCFIILHFFLGNWPVLGMLPGLLLEFHRIYDFSVEVLENSDLTFPFKGPWFTGMDMLFTVDPTNIHHIMSSNFSNYTKGPDFKQVFDVFGDGILTTDDSELWKNLKKASLVMLNHQGFQSLSMSTTEVLKDGLVPLFNHFAENGTVVDLQDVFKRFMFDTTLVTVTGSADPRSLSIEMPEVEFAKALDHVGEGIMHRHVRPRLLWKLQKCVGFGQEKKFSKADATLNQACAKYILEKREETRSQGFDYHSNGSESEDILTYHIKIDTTKYELLNPSDDKFLRDTILAFVLAGRDTTASALTWFFWLLLENPQVVTKIRQEINTSNGGQEKPSCEPMEYLNNLVYLHGALYEAMRLYPPVPFERMSPIKPDVLPSGHKVDSSMKILI…
AtCYP96A15	MAMLGFYVTFIFFLVCLFTYFFLQKKPQGQPILKNWPFLRMLPGMLHQIPRIYDWTVEVLEATNLTFYFKGPWLSGTDMLFTADPRNIHHILSSNFGNYPKGPEFKKIFDVLGEGILTVDFELWEEMRKSNHALFHNQDFIELSVSSNKSKLKEGLVPFLDNAAQKNIIIELQDVFQRFMFDTSSILMTGYDPMSLSIEMLEVEFGEAADIGEEAIYYRHFKPVILWRLQNWIGIGLERKMRTALATVNRMFAKIISSRRKEEISRAKTEPYSKDALTYYMNVDTSKYKLLKPNKDKFIRDVIFSLVLAGRDTTSSVLTWFFWLLSKHPQVMAKLRHEINTKFDNEDLEKLVYLHAALSESMRLYPPLPFNHKSPAKPDVLPSGHKVDANSKIVICIYA…
AtCYP96A2	MASISLLQVSVAILCFLILHYFLFKKPHGRYPRNWPVLRMLPAMLKALHRIYDYSVKILETSDLTFPFKGPRFTGMDMLLTVDPANIHHIMSSNFSNYIKGPEFQDVFDVLGDSFITTDSELWKNMRKSYQAMLHSQEFQRFSMSTMTSKLKYGLVPLLNHFAEEGTTLDLQSVFGRFTFDTIFILVTGSDPRSLSIEMPEDEFAKALDDVGEGILYRHFKPRFLWKLQNWIGFGQEKKLTEANATFDRVCAKYISAKREEIKRSQGTSNGGSQDLLTSFIKLDTTKYKLLNPSDDKFLRDNILAFILAGRDTTATALSWFFWLLSENPHVVAKIHQEININTDLSRTGNSQENVDKLVYLHGALCEAMRLYPPVSFGRKSPIKSDVLPSGHKVDANSK…
AtCYP96A3	MAIVIGLLEIFTAFVFFIFFQCLLLHKKTPKPLLTNWPALGMLPGLLLQVPRIYDWITEVLEATDMTFCFKGPCLSGMDILLTVDPVNIHYILSSNFANYPKGMEFKKIFEVVGDSIFNVDSGLWEDMRNSSHAIFSNQDFQMFWVSTSVRKLRQGLVPILENAADKNILVDLQDLFQRFLFDTSLILMTGYDPKCLSVEMPKVEFGDAVDGVSDGVFYRHVKPVFLWRLQYLIGVGVEKRLKRGLAVFDQLLEKIITAKREEINSHGTHHPSRGEAIDVLTYYMTMDTTKYKYLEPSDDRFIKDTILGFLIAARDTTSSALTWFFWLMSKNPEAINKIRQEVNKKMPRFDPADLEKLVYLHGAVCETLRLYPPVPFNHKSPAKPDVLPSGHRVDEKWK…
AtCYP96A4	MAMIIGLLEIFIAFIFFFVYQCFSLHKKTPKHMVMNWPVLGMLPGVLFQIPRIYDFVTEALEAENMTGCFIGPWLSGTDILLTVDPVNIQYILSSNFVNYPKGKKFNKIFEFLGDGIFNVDSGLWEDMRNSSHAIFSHQDFQSFSVSTSVSKLSQGLVPILDNAVEKHILVDLQDLFQRFLFDTSSTLMAGYDPKSLSVEMPKVEFADAMDGVADAMFYRHLKPAFLWSIQSWIGVGIEKKMRRGLDVFDQMLGKIISAKREEIKNHGIHDSKGEAMDVLTYYMTIDTTKYKHLKPSNDKFIRDTILGLVIAARDTTSSALTWFFWLLSKNPEAMTKIRQEINKKMPKFDPADLDKLVYLDGAVCETLRLYPSVPFNHKSPAKPDVLPSGHKVDKNWRV…
AtCYP96A5	MAYVGLVEVFIALLVFFFFHFLIHKKSHQITPRNWPVLGMLPGVLVMLHRINDYVAEILEVSNLTFAFKGPWFSGMNMLITADPSNIQHVFSSNFSNYDKGPEFKEMFDFLGNGIFTADSKLWEDMRKSALVVLSHQGFQSFSLRTITCKIKNGLVPVLDHFAEANTVFDLQDVFQRLAFDVTLTLVTGCDSSSLSIEMPKNEYAKAMDDAEEVVVYRHVKPVVLWKLQNWIGLGEEKKMKEANAAFDRSCAKYISAKREEIISHHSNIGGEAHAEDLLSVYMNLDISKYELLNPNDDNFLKDIIKSFMLAGRDAIATTLTWFFWLLSKNPEAVTKIRQEINTNLPGSGMSLDADKLNKMVYLHGALCESLRLYAPIPFERKTPIKQDVLPSGHMVDKN…
AtCYP96A7	MASIGLYEAFIGFLCFLISFYFLVKKPFRYLLIKKTHQSYPWNWPVLGMLPGILLRLQRIYDYSVEFLENSNMTFQFKGPWFVGMDILATADPTNIHYIMSSNFSNYIKGPIFHEIFEAFGDGIINTDAELWRDWRNASQLIFNHQRYQNFSASTTKSKVNDGLVPLFIVDLQDVFQRFMFDITFIFLTGTDPRSLSIEMPEIEFAKALDDVGDVIVYRHITPRFVWKLQKWIGIGTEKKMSKANATLDRVCEKLIAAKREELRSQGIIDNANGDSEDLLTSHIMLDATKYELLNPNDDKFLRDFTVSFMAAGRDSTSSALTWFFWNLTENPNVLSKILQEINTNLPRTGSDQDMSSYLNKLVYLHGALNESMRLYPPIPFERKSPIKDDVLPSGHKVK…
AtCYP96A8	MASIGLYEAFIGFLCFLISFYFLVKKPFSYLLIKKTLQSYPWNWPVLGMLPGVLLRLQRIYDCSVEVLENSNMTFQFKGPWFVGMDVLATVDPANIHHIMSSNFSNYIKGPIFHEIFEAFGDGIINTDAELWRDWRNASQLIFNHQRYQNFSASTTKTKVNDGLVPLFNHFANEEIVVDLEDVFQRFMYDITFIFITGTDPRSLSIEMPEVEFSKALDDVGDAIVHRHITPRFVWKLQKWIGIGTEKKMLKAHATFDRVCEKIIAAKREELGSQGITYNSNGEREDLLTSFIKLDATKYEVLKPSHDKFLRDFTIGFMAAGRDSTASTLTWFFWNLSKNPNVLTKILQEINTNLPRTGSDQDMSSYLNKLVYLHGALSESMRLYPPIPFQRKSPIKEDV…
AtCYP96A9	MALVSLLEISIAFFCFLIFRIFLISKKPHRSFLTNWPLLGMLPGLLTVLPRVYDFITEVLEDGNLNYLFIGPFLGGIDMLFTVDPANIHHIMSSNFANYPKGTEFKKLFDVLGDGIFNADSDLWKDLRKSSQSMMNHPDFQRFSLATSLSKLEKGLVPLLDHVAKEKLVVDLQDVFQRFTFDTTFVLATGYDPGCLSVEMPEIEFARALDDAEEAIFYRHFKPEVVWKMQRLIGVGAELKLKRAHAIFDRVCSKCIASKRDEISQGIDSSSSKDLLMSSINVDTTKYKLLNPSDDRFLRDTILSFMLAGRDTTGSALTWFFWLLCNNQEAMTKIRQEINTNLFPRNKTDDGSVSYDSDSFNPQEVKKLVYLHGAVCEALRLYPPVPFNHKSPAKPDVLP…
AtCYP97A3	MAFPLSYTPTITVKPVTYSRRSNFVVFSSSSNGRDPLEENSVPNGVKSLEKLQEEKRRAELSARIASGAFTVRKSSFPSTVKNGLSKIGIPSNVLDFMFDWTGSDQDYPKVPEAKGSIQAVRNEAFFIPLYELFLTYGGIFRLTFGPKSFLIVSDPSIAKHILKDNAKAYSKGILAEILDFVMGKGLIPADGEIWRRRRRAIVPALHQKYVAAMISLFGEASDRLCQKLDAAALKGEEVEMESLFSRLTLDIIGKAVFNYDFDSLTNDTGVIEAVYTVLREAEDRSVSPIPVWDIPIWKDISPRQRKVATSLKLINDTLDDLIATCKRMVEEEELQFHEEYMNERDPSILHFLLASGDDVSSKQLRDDLMTMLIAGHETSAAVLTWTFYLLTTEPSVVA…
AtCYP97B3	MAFPAAATYPTHFQGGALHLGRTDHCLFGFYPQTISSVNSRRASVSIKCQSTEPKTNGNILDNASNLLTNFLSGGSLGSMPTAEGSVSDLFGKPLFLSLYDWFLEHGGIYKLAFGPKAFVVISDPIIARHVLRENAFSYDKGVLAEILEPIMGKGLIPADLDTWKLRRRAITPAFHKLYLEAMVKVFSDCSEKMILKSEKLIREKETSSGEDTIELDLEAEFSSLALDIIGLSVFNYDFGSVTKESPVIKAVYGTLFEAEHRSTFYFPYWNFPPARWIVPRQRKFQSDLKIINDCLDGLIQNAKETRQETDVEKLQERDYTNLKDASLLRFLVDMRGVDIDDRQLRDDLMTMLIAGHETTAAVLTWAVFLLSQNPEKIRKAQAEIDAVLGQGPPTYESM…
AtCYP97C1	MESSLFSPSSSSYSSLFTAKPTRLLSPKPKFTFSIRSSIEKPKPKLETNSSKSQSWVSPDWLTTLTRTLSSGKNDESGIPIANAKLDDVADLLGGALFLPLYKWMNEYGPIYRLAAGPRNFVIVSDPAIAKHVLRNYPKYAKGLVAEVSEFLFGSGFAIAEGPLWTARRRAVVPSLHRRYLSVIVERVFCKCAERLVEKLQPYAEDGSAVNMEAKFSQMTLDVIGLSLFNYNFDSLTTDSPVIEAVYTALKEAELRSTDLLPYWKIDALCKIVPRQVKAEKAVTLIRETVEDLIAKCKEIVEREGERINDEEYVNDADPSILRFLLASREEVSSVQLRDDLLSMLVAGHETTGSVLTWTLYLLSKNSSALRKAQEEVDRVLEGRNPAFEDIKELKYITR…
AtCYP98A3	MSWFLIAVATIAAVVSYKLIQRLRYKFPPGPSPKPIVGNLYDIKPVRFRCYYEWAQSYGPIISVWIGSILNVVVSSAELAKEVLKEHDQKLADRHRNRSTEAFSRNGQDLIWADYGPHYVKVRKVCTLELFTPKRLESLRPIREDEVTAMVESVFRDCNLPENRAKGLQLRKYLGAVAFNNITRLAFGKRFMNAEGVVDEQGLEFKAIVSNGLKLGASLSIAEHIPWLRWMFPADEKAFAEHGARRDRLTRAIMEEHTLARQKSSGAKQHFVDALLTLKDQYDLSEDTIIGLLWDMITAGMDTTAITAEWAMAEMIKNPRVQQKVQEEFDRVVGLDRILTEADFSRLPYLQCVVKESFRLHPPTPLMLPHRSNADVKIGGYDIPKGSNVHVNVWAVARD…
AtCYP98A8	MIIYLISLLPIIVATLMLYQRWWRSNIPPGPKPKFLLGNLHQMKPLWTHSFSEWSETYGPIISVWIGSQLTVVVSSSDLARQVLRDKDHQLSNRHRIARMTQTGTDLVWSDYSPHYVKLRKLCTLELFSLKSIENFRSLREMEARSMVVSILKDLMSNSGDDQERKPVIVRKYLAAVVLNTISRLMIGKEFGSEEGKEFKAIVEKEHLLSGSGTILDHVWWLKWVSSWFFSDKEFLAHKDRRTKWFRGAIMVEEDIEIEDHRGFVRKLLVLKEQKELSEETVGGLVWNMLTAGADTTAVVIEWAMAEMIKCPTVQEKAQQELDSVVGSERLMTESDIPILPYLQCVVKEALRLHPSTPLMLPHKASETVWVGGYKVPKGATVYVNVQAIGRDPANWINP…
AtCYP98A9	MDLLLISLTTIIIAAYMQNLRRRGSNIPPGPPTRFLVGNLHQLKPLWTQSFSEWSQTYGPIISVWLGSQLAVVVSSSDLAKQVLRDKDYQLCNRHRTARMTQNGSDLIWSDYGAHYVKMRKLCTLELFSLKSIECFRSMREMEVSSMVKSIFNDFMSDDQKPVVLRNYLDSVALNIVSRLVIGKTFEPKDGREFRSIVERETRLPGATKMLDYTVWLKRLSSWFTSDKAFMKHMARKRNWFKRAVMDEVYGGRDQKCFVQSLLELKEKDELTEETVMGLVWNMLTAGADTTAITIEWAMAEMIRCPTVKEKVQDELDSVVGSGRLMSDADIPKLPFLQCVLKEALRLHPPTPLMLPHKASESVQVGGYKVPKGATVYVNVQAIARDPANWSNPDEFRPE…
AtCYP712A1	MDLKLNTKLIILITSLAFPFMLYALFKWFLKEQGSLAATKLPQSPPALPFIGHLHLIGKVLPVSFQSLAHKYGPLMEIRLGASKCVVVSSSSVAREIFKEQELNFSSRPEFGSAEYFKYRGSRFVLAQYGDYWRFMKKLCMTKLLAVPQLEKFADIREEEKLKLVDSVAKCCREGLPCDLSSQFIKYTNNVICRMAMSTRCSGTDNEAEEIRELVKKSLELAGKISVGDVLGPLKVMDFSGNGKKLVAVMEKYDLLVERIMKEREAKAKKKDGTRKDILDILLETYRDPTAEMKITRNDMKSFLLDVFMAGTDTSAAAMQWAMGQLINHPQAFNKLREEINNVVGSKRLVKESDVPNLPYLRAVLRETLRLHPSAPLIIRECAEDCQVNGCLVKSKTRV…
AtCYP712A2	MFTLNLDMNYTSCSYLFFTLVTIFLLHRLFSSSSRRGLPPGPRGLPVLGHMHLLRSSLPRSLQALAHTYGPLMTIRIGSLRVLVVSDSDTAKLILKTHDPDFASKFVFGPRQFNVYKGSEFFNAPYGSYWRFMKKLCMTKLFAGYQLDRFVDIREEETLALLSTLVERSRNGEACDLGLEFTALTTKILSKMVMGKRCRQNSNIPKEIRKIVSDIMACATRFGFMELFGPLRDLDLFGNGKKLRSSIWRYDELVEKILKEYENDKSNEEEEKDKDIVDILLDTYNDPKAELRLTMNQIKFFILELFMASLDTTSAALQWTMTELINHPDIFAKIRDEIKSVVGTTNRLIKESDLQKLPYLQAAIKETLRLHPVGPLLRRESNTDMKINGYDVKSGTKIF…
SlCYP74D1	MANTKDSYHIITMDTKESSIPSLPMKEIPGDYGVPFFGAIKDRYDFHYNQGADEFFRSRMKKYDSTVFRTNVPPGPFNARNSKVVVLVDAVSYPILFDNSQVDKENYFEGTFMSSPSFNGGYKVCGFLGTSDPKHTTLKGLFLSTLTRLHDKFIPIFTTSITSMFTSLEKELSEKGTSYFNPIGDNLSFEFLFRLFCEGKNPIDTSVGPNGPKIVDKWVFLQLAPLISLGLKFVPNFLEDLVLHTFPLPYILVKRDHQKLYNAFYNSMKDILDEAEKLGVKRDEACHNFVFLAGFNSYGGLKVFFPSLIKWIGTSGPSLHARLVKEIRTAVKEAGGVTLSAIDKMPLVKSVVYETLRMDPPVPFQTVKARKNIIITNHESSFLIKKDELIFGYQPLATK…
OsCYP74A1	MATAAACISFASPSPARVVIRRQTRASASASATDRQEVVSPKRRLPLRKVPGDYGPPVVGAIRDRYEYFYGPGGRDGFFAARVRAHRSTVVRLNMPPGPFVARDPRVVALLDAASFPVLFDTSLVDKTDLFTGTFMPSTDLTGGYRVLSYLDPSEPNHAPLKTLLFYLLSHRRQQVIPKFREVYGDLFGLMENDLARVGKADFGVHNDAAAFGFLCQGLLGRDPAKSALGRDGPKLITKWVLFQLSPLLSLGLPTLVEDTLLHSLRLPPALVKKDYDRLADFFRDAAKAVVDEGERLGIAREEAVHNILFALCFNSFGGMKILFPTLVKWLGRAGARVHGRLATEVRGAVRDNGGEVTMKALAEMPLVKSAVYEALRIEPPVAMQYGRAKRDMVVESHD…
SlCYP74B	MNSAPLSTPAPVTLPVRSIPGSYGLPLVGPIADRLDYFWFQKPENFFTKRMEKHKSTVFRTNVPPCFPFFGSVNPNVVAVLDVKSFSHLFDMEIVEKANVLVGDFMPSVVYTGDMRVCAYLDTSEPKHAQIKNFSQDILKRGSKTWVPTLLKELDTMFTTFEADLSKSNTASLLPALQKFLFNFFSLTILGADPSVSPEIANSGYIFLDSWLAIQLAPTVSIGVLQPLEEILVHSFAYPFFLVKGNYEKLVQFVKNEAKEVLSRAQTEFQLTEQEAIHNLLFILGFNAFGGFSIFLPTLLGNLGDEKNADMQEKLRKEVRDKVGVNPENLSFESVKEMELVQSFVYETLRLSPPVPSQYARARKDFKLSSHDSVYEIKKGELLCGYQPLVMKDPKVFDE…
SlCYP74A1	MALTLSFSLPLPSLHQKIPSKYSTFRPIIVSLSDKSTIEITQPIKLSTRTIPGDYGLPGIGPWKDRLDYFYNQGKNDFFESRIAKYKSTIFRTNMPPGPFITSNPKVIVLLDGKSFPVLFDASKVEKKDLFTGTFVPSTELTGGYRILSYLDPSEPNHEKLKKLMFFLLSSRRDHVIPEFHETYTELFETLDKEMEEKGTVGFNSGSDQAAFNFLARSLFGVNPVETKLGTDGPALIGKWILLQLHPVITLGLPKFLDDVLLHTFRLPPILVKKDYQRLYDFFYTNSANLFIEAEKLGISKDEACHNLLFATCFNSFGGMKIFFPNMLKSIAKAGVEIHTRLANEIRSEVKSAGGKITMSAMEKMPLMKSVVYEALRVDPPVASQYGRAKQDLKIESHD…
SlCYP74A2	MASTSLSLPSLKLQFPSHTSSSSRKNSSSYRVSIRPIQASVSEIPPYISSPSQSPSSSSSPPVKQAKLPAQKVPGDYGLPLVGPWKDRLDYFYNQGKNEFFKSRIQKHQSTVFRTNMPPGPFISFNPNVVVLLDGKSFPVLFDVSKVEKKDLFTGTFMPSTDLTGGYRVLSYLDPSEPNHAKLKKLMFYLLSSRRNEVIPEFHNSYSELFETLENELSTKGKAGLNAANDQAAFNFLARSLYGINPQDTELGTDGPKLIGKWVLFQLHPLLILGLPKVLEDLVMHTFRLPPALVKKDYQRLYNFFYENSTSVLDEAEKIGISREEACHNLLFATCFNSFGGIKIFFPNMLKWIGRAGAKLHSQLAQEIRSVISSNSGKVTMAAMEKMPLMKSVVYESLR…
MtCYP51G1	MNVFDGNKFLNTLLLLITTLIAAKLISSFIIPKSKKRLPPILQGWPIIGGLLRFLKGPIILLREEYPKLGGVFTLKIFHKNITFLIGPEVSAHFFKAPESDLSQQEVYQFNVPTFGPGVVFDVDYSVRQEQFRFFTEALRVNKLKSYVNQMVSEAEDYFSKWGSSGEVDLKYELEHLIILTASRCLLGREVRDKLFDDVSALFHDLDNGMLPISVLFPYLPIPAHRRRDNARKKLAEIFANIISSRKIADKSEDDMLQCFIDSKYKDGRPTTESEVTGLLIAALFAGQHTSSITSTWTGAYLLCNKQYLSAVEEEQKNLMEKHGDRVDHDVLAEMDVLYRCIKEALRLHPPLIMLLRSSHSDFSVTTREGKEYDIPKGHIVATSPAFANRLPHIFNDPD…
SlCYP710A11	MASIWGLLSPWIPYFISFIAFLLLLEQISYIKKKRFLPGPTLVFPFLGNVIPLVTNPTKFWDLQSALAKSTSHGFSVNYIIGKFILYIHSTDLSHKVFANVRPDAFHLIGHPFGKKLFGEHNLIYMFGQEHKDLRRRIAPNFTPKALGTYTDIQQRIIIKHFKSWLDEASKSPNTPIPLRLLCRDMNLDTSQTVFVGPYLDGESRKRFNVDYNYFNVGLRKLPVDLPGFAFRNARLAVGRLVDTLSVCVEQSLNKMKNEEEPTCLIDFWMQENLREINEAKINGLQKPFQYSNKELGGYLFDFLFAAQDASTSALLWAIVLLDSHPQVLEKVRSDVARFWSPESEEPLTAEMLTEMKYLEAVAREIIRIRAPATMVPHIAGEEFRLTEDYVIPKGTIVF…
MlCYP87D16	MWVVGLIGVAVVTILITQYVYKWRNPKTVGVLPPGSMGLPLIGETLQLLSRNPSLDLHPFIKSRIQRYGQIFATNIVGRPIIVTADPQLNNYLFQQEGRAVELWYLDSFQKLFNLEGANRPNAVGHIHKYVRSVYLSLFGVESLKTKLLADIEKTVRKNLIGGTTKGTFDAKHASANMVAVFAAKYLFGHDYEKSKEDVGSIIDNFVQGLLAFPLNVPGTKFHKCMKDKKRLESMITNKLKERIADPNSGQGDFLDQAVKDLNSEFFITETFIVSVTMGALFATVESVSTAIGLAFKFFAEHPWVLDDLKAEHEAVLSKREDRNSPLTWDEYRSMTHTMHFINEVVRLGNVFPGILRKALKDIPYNGYTIPSGWTIMIVTSTLAMNPEIFKDPLAFNPK…
OsCYP90B2	MAAMMASITSELLFFLPFILLALLTFYTTTVAKCHGGHWWRGGTTPAKRKRMNLPPGAAGWPLVGETFGYLRAHPATSVGRFMEQHIARYGKIYRSSLFGERTVVSADAGLNRYILQNEGRLFECSYPRSIGGILGKWSMLVLVGDPHREMRAISLNFLSSVRLRAVLLPEVERHTLLVLRAWPPSSTFSAQHQAKKFTFNLMAKNIMSMDPGEEETERLRREYITFMKGVVSAPLNLPGTPYWKALKSRAAILGVIERKMEERVEKLSKEDASVEQDDLLGWALKQSNLSKEQILDLLLSLLFAGHETSSMALALAIFFLEGCPKAVQELREEHLGIARRQRLRGECKLSWEDYKEMVFTQCVINETLRLGNVVRFLHRKVIKDVHYKGYDIPSGWKI…
OsCYP90A3	MAAAALLLLAAAAAIVVVAMVLRWLLLLGGPAAGRLGKRALMPPGSTGLPLIGETLRLISAYKTPNPEPFIDERVARHGGVFTTHVFGERTVFSADPAFNRLLLAAEGRAVHSSYPSSIATLLGARSLLLTRGAAHKRLHSLTLTRLGRPASPPLLAHIDRLVLATMRQWEPAATVRLMDEAKKITFNLTVKQLVSIEPGPWTESLRREYVKLIDGFFSIPFPLANLLPFTTYGQALKARKKVAGALREVIKKRMEEKAENGGSIGDDEGKKEKKDMVEELLEAEGGSFSEEEMVDFCLSLLVAGYETTSMLMTLAVKFLTETPAALAELKEEHANIRDMKGKKQPLEWSDYKSMPFTQCVINETLRVGNIISGVFRRANTDIHYKDYTIPKGCKIFAS…
OsCYP90D2	MVSAAAGWAAPAFAVAAVVIWVVLCSELLRRRRRGAGSGKGDAAAAARLPPGSFGWPVVGETLEFVSCAYSPRPEAFVDKRRKLHGSAVFRSHLFGSATVVTADAEVSRFVLQSDARAFVPWYPRSLTELMGKSSILLINGALQRRVHGLVGAFFKSSHLKSQLTADMRRRLSPALSSFPDSSLLHVQHLAKSVVFEILVRGLIGLEAGEEMQQLKQQFQEFIVGLMSLPIKLPGTRLYRSLQAKKKMARLIQRIIREKRARRAAASPPRDAIDVLIGDGSDELTDELISDNMIDLMIPAEDSVPVLITLAVKFLSECPLALHQLEEENIQLKRRKTDMGETLQWTDYMSLSFTQHVITETLRLGNIIGGIMRKAVRDVEVKGHLIPKGWCVFVYFRSV…
OsCYP90A4	MAAAALLLLAAAAAAVVVAMALRWLLLLGGPAAGRLGKRARMPPGSTGLPLIGETLRLISAYKTPNPEPFIDERVARHGGVFTTHVFGERTVFSADPAFNRLLLAAEGRAVHSSYPSSIATLLGARSLLLTRGAAHKRLHSLTLTRLGRPASPPLLAHIDRLVLATMRQWEPAATVRLMDEAKKITFNLTVKQLVSIEPGPWTESLRREYVKLIDGFFSIPFPLAYFLPFTTYGQALKARKKVAGALREVIKKRMEEKAENGGSIGDDEGKKEKKDMVEELLQAEGGSFSEEEMVDFCLSLLVAGYETTSVLMTLAVKFLTETPAALAELKEEHANIRDMKGKNQPLEWSDYKSMPFTQCVINETLRVGNIISGVFRRANTDIHYKDYTIPKGCKIFAS…
OsCYP85A1	MVLVAIGVVVAAAVVVSSLLLRWNEVRYSRKRGLPPGTMGWPLFGETTEFLKQGPSFMKARRLRYGSVFRTHILGCPTVVCMEAELNRRALASEGRGFVPGYPQSMLDILGRNNIAAVQGPLHRAMRGAMLSLVRPAMIRSSLLPKIDAFMRSHLAAWSSSSSSAVVDIQAKTKEMALLSALRQIAGVSAGPLSDALKAELYTLVLGTISLPINLPGTNYYQGFKARKKLVAMLEQMIAERRSSGQVHDDMLDALLTGVEGTREKLTDEQIIDLIITLIYSGYETMSTTSMMAVKYLSDHPKALEQLRKEHFDIRKGKAPEDAIDWNDFKSMTFTRAVIFETLRLATVVNGLLRKTTQDVEMNGYVIPKGWRIYVYTREINYDPFLYPDPMTFNPWRWL…
SlCYP85A3	MAIFLIIFVVFFGFCILSTPLFRWIDIVYNKKNLPPGTMGWPIFGETREFLNQGPNFMKNQRARYGNFFKSHILGCPTVVSMDAGLNVYILNNEAKGLIPGYPQSMLDILGKCNIAAVHGATHKYIRGALLSLINPTMIKDHILPKIDKFMRSHLSGWDNCNVIDIQQMTKEMAFFSSLDQIGGFATSSSIAQEFRAGFLNIALGTISLPINFPTTNYYRGLQGRKTIVKLLRKIIEDRRGSKKIQQDMLGLMMNEEAKNRYTLSDEELIDQIITIMYSGFETVSTTSMMAVKYLHDHPKALEEIRKEHFAIREKKSLEDPIDYNDFKAMRFTRAVIYETLRLATIVNGVLRKTTQDMELNGYMIPKGWRIYVYTRELNYDPLIYPDPYTFNPWRWLEN…
SlCYP85A1	MAFFLIFLSSFFGLCIFCTALLRWNQVKYNQKNLPPGTMGWPLFGETTEFLKLGPSFMKNQRARYGSFFKSHILGCPTIVSMDSELNRYILVNEAKGLVPGYPQSMIDILGKCNIAAVNGSAHKYMRGALLSLISPTMIRDQLLPKIDEFMRSHLTNWDNKVIDIQEKTNKMAFLSSLKQIAGIESTSLAQEFMSEFFNLVLGTLSLPINLPNTNYHRGFQARKIIVNLLRTLIEERRASKEIQHDMLGYLMNEEATRFKLTDDEMIDLIITILYSGYETVSTTSMMAVKYLHDHPKVLEELRKEHMAIREKKKPEDPIDYNDYRSMRFTRAVILETSRLATIVNGVLRKTTQDMEINGYIIPKGWRIYVYTRELNYDPRLYPDPYSFNPWRWMDKSLE…
MtCYP716A12	MEPNFYLSLLLLFVTFISLSLFFIFYKQKSPLNLPPGKMGYPIIGESLEFLSTGWKGHPEKFIFDRMRKYSSELFKTSIVGESTVVCCGAASNKFLFSNENKLVTAWWPDSVNKIFPTTSLDSNLKEESIKMRKLLPQFFKPEALQRYVGVMDVIAQRHFVTHWDNKNEITVYPLAKRYTFLLACRLFMSVEDENHVAKFSDPFQLIAAGIISLPIDLPGTPFNKAIKASNFIRKELIKIIKQRRVDLAEGTASPTQDILSHMLLTSDENGKSMNELNIADKILGLLIGGHDTASVACTFLVKYLGELPHIYDKVYQEQMEIAKSKPAGELLNWDDLKKMKYSWNVACEVMRLSPPLQGGFREAITDFMFNGFSIPKGWKLYWSANSTHKNAECFPMPE…
VvCYP716A15	MEVFFLSLLLIFVLSVSIGLHLLFYKHRSHFTGPNLPPGKIGWPMVGESLEFLSTGWKGHPEKFIFDRISKYSSEVFKTSLLGEPAAVFAGAAGNKFLFSNENKLVHAWWPSSVDKVFPSSTQTSSKEEAKKMRKLLPQFFKPEALQRYIGIMDHIAQRHFADSWDNRDEVIVFPLAKRFTFWLACRLFMSIEDPAHVAKFEKPFHVLASGLITVPIDLPGTPFHRAIKASNFIRKELRAIIKQRKIDLAEGKASQNQDILSHMLLATDEDGCHMNEMEIADKILGLLIGGHDTASAAITFLIKYMAELPHIYEKVYEEQMEIANSKAPGELLNWDDVQKMRYSWNVACEVMRLAPPLQGAFREAITDFVFNGFSIPKGWKLYWSANSTHKSPECFPQP…
VvCYP716A17	MEVFFLSLLLICVLSVSIRLYLLLYKHRSHFTGPNLPPGKIGWPMVGESLEFLSTGWKGHPEKFIFDRISKYSSEVFKTSLLGEPAAVFAGAAGNKFLFSNENKLVHAWWPSSVDKVFPSSTQTSSKEEAKKMRKLLPQFLKPEALQRYTGIMDHIAQRHFADSWDNRDEVIVFPLAKRFTFWLACRLFMSIEDPAHVAKFEKPFHVLASGLITIPIDLPGTPFHRAIKASNFIRKELRAIIKQRKIDLAESKASKTQDILSHMLLATDEDGCHMNEMSIADKILGLLIGGHDTASSAITFLVKYMAELPHIYEKVYKEQMEIANSKAPGELLNWDDVQKMRYSWNVACEVMRLAPPLQGAFREAITDFVFNGFSIPKGWKLYWSANSTHKSLECFPQP…
SlCYP707A2	MEFVSMLCLFTFISLTLLLIHSIFKFLAFASKKLPLPPGTLGLPYIGETFQLYSQNPNVFFASKVKKYGSIFKTYILGCPCVMISSPEAAKQVLVTKANLFKPTFPASKERMLGKQAIFFHQGDYHAKLRKLVLQAFKPDSIRNIIPDIESIAITSLESFQGRLINTYQEMKTYTFNVALISIFGKDEFLYREELKKCYYILEKGYNSMPINLPGTLFNKAMKARKELAKIVAKIISTRREMKIDHGDLLGSFMGDKEGLTDEQIADNVIGVIFAARDTTASVLTWILKYLGENPSVLQAVTEEQENIMRKKEVNGEEKVLNWQDTRQMPMTTRVIQETLRVASILSFTFREAVEDVEFEGYLIPKGWKVLPLFRNIHHSPDNFPEPEKFDPSRFEVSP…
SlCYP707A1	MVNYFEIFLYISMFVLGYLSYYFCFGKNNNSSSKKNAYKLPPGSMGWPYIGETLQLYSQDPNAFFINRQRRFGEIFKTKILGCPCVMLASPEAARFVLVNQANLFKPTYPKSKENLIGQSAIFFHQGDYHNHLRKLVQAPLNPESIRNQIPYIEELSISALNSWVGGHVVNTYHEMKKFSFEVGILAIFGHLDGHVKEELKKNYSIVDKGYNSFPINLPGTLYRKALQARKKLGKILSEIIREMKEKKTLEKGLLSCFLNAKEEKGFLVLNEDQIADNIIGVLFAAQDTTASVLTWIIKYLHDNPKLLECVKAEQKVIWQSNEQENHGLTWTQTRKMPITSRVVLETLRMASIISFAFREAVADVEYKGYLIPKGWKVMPLFRNIHHNPEFFPDPQKFD…
OsCYP724B1	MVGGELVLAALVILLALLLTLVLSHFLPLLLNPKAPKGSFGWPLLGETLRFLSPHASNTLGSFLEDHCSRYGRVFKSHLFCTPTIVSCDQELNHFILQNEERLFQCSYPRPIHGILGKSSMLVVLGEDHKRLRNLALALVTSTKLKPSYLGDIEKIALHIVGSWHGKSKDKGMVNVIAFCEEARKFAFSVIVKQVLGLSPEEPVTAMILEDFLAFMKGLISFPLYIPGTPYAKAVQARARISSTVKGIIEERRNAGSSNKGDFLDVLLSSNELSDEEKVSFVLDSLLGGYETTSLLISMVVYFLGQSAQDLELVKREHEGIRSKKEKDEFLSSEDYKKMEYTQHVINEALRCGNIVKFVHRKALKDVRYKEYLIPSGWKVLPVFSAVHLNPLLHGNAQQ…
PtCYP720B1	MADQISLLLVVFTAAVALLHLIYRWWNAQRGQKRTSNEKNQELHLPPGSTGWPLIGETYSYYRSMTSNRPRQFIDDREKRYDSDVFVSHLFGSQAVISSDPQFNKYVLQNEGRFFQAHYPKALKALIGDYGLLSVHGDLQRKLHGIAVNLLRFERLKFDFMEEIQNLVHSTLDRWVDKKEIALQNECHQMVLNLMAKQLLDLSPSKETNEICELFVDYTNAVIAIPIKIPGSTYAKGLKARELLIRKISNMIKERRDHPHIVHKDLLTKLLEEDSISDEIICDFILFLLFAGHETSSRAMTFAIKFLTTCPKALTQMKEEHDAILKAKGGHKKLEWDDYKSMKFTQCVINETLRLGNFGPGVFRETKEDTKVKDCLIPKGWVVFAFLTATHLDEKFHNE…
VsCYP94A2	MELETLISWLLFSTSLFWFLFLATKTKSKPPKTPSSTTNTPIPKSYPIFGSAFSLLANFHRRIQWTSDILQTIPSSTFVLHRPFGARQVFTAQPAVVQHILRTNFTCYGKGLTFYQSINDFLGDGIFNADGESWKFQRQISSHEFNTRSLRKFVETVVDVELSDRLVPVLSQASNSQTTLDFQDILQRLTFDNICMIAFGYDPEYLLPSLPEIPFAKAFDESSQLSIERLNALIPLLWKVKRFLNIGVERQLKEAVAEVRGLATKIVKNKKKELKEKALQSESESVDLLSRFLSSGHSDESFVTDMVISIILAGRDTTSAALTWFFWLLSKHSHVENEILKEITGKSETVGYDEVKDMVYTHAALCESMRLYPPLPVDTKVAVHDDVLPDGTLVKKGWR…
VsCYP94A1	MFQFHLEVLLPYLLPLLLLILPTTIFFLTKPNNKVSSTSTNNNIITLPKSYPLIGSYLSFRKNLHRRIQWLSDIVQISPSATFQLDGTLGKRQIITGNPSTVQHILKNQFSNYQKGTTFTNTLSDFLGTGIFNTNGPNWKFQRQVASHEFNTKSIRNFVEHIVDTELTNRLIPILTSSTQTNNILDFQDILQRFTFDNICNIAFGYDPEYLTPSTNRSKFAEAYEDATEISSKRFRLPLPIIWKIKKYFNIGSEKRLKEAVTEVRSFAKKLVREKKRELEEKSSLETEDMLSRFLSSGHSDEDFVADIVISFILAGKDTTSAALTWFFWLLWKNPRVEEEIVNELSKKSELMVYDEVKEMVYTHAALSESMRLYPPVPMDSKEAVNDDVLPDGWVVKKG…
NaCYP96T1	MATSSSAWLMFSDHYPEILIAIACFLIFSLLLSARSSSEDSLPYNWPIFGMLPAIISNNQFNDFTTARLRKMGWTFIFKGPWLLDMDYIFTCDPSNINHMFNDNFENYPKGELGKVFDIFGNNIFNADGDLWHDHRKMAQTILWDGNYRTMQATFIRNKMDNALIPILDSAASKRKPVDLQDVFFRFTFDTSCFSVLAADPESLTMEFPAVPFSKAADQALDAALTRHITPRLIWKLKRFFNVGSERTLAVAWKVIDSYIYDKIAELKAKRKLVGKINSYDAVSFYMDNFNIHDDKFLRDNAFTYLLAQRNTQSLTMTWLFYALFENPKVELKILSELKSIVDESSERKFNDGFALFDSNMIQSAIYLHATLCEALRIYPPVPFEIKDAHKADVLPSGH…
CrCYP72A224	MELNFKSIIFLVFVSLTLYWVYRILDWVWFKPKKLEKCLREQGFKGNPYRLFLGDQYDSGKLIRQALTKPIGVEEDVKKRIVPHILKTVGTHGKKSFMWVGRIPRVNITDPELIKEVLTKYYKFQKNHHDLDPITKLLLTGIGSLEGDPWAKRRKIINAAFHFEKLKLMLPAFYLSCRDMVTKWDNKVPEGGSAEVDVWHDIETLTGDVISRTLFGSNFEEGRRIFELMKELTALTIDVIRSVYIPGQRFLPTKRNNRMRAIDKEVRVRITEIINKKMKVMKSGEAASAADDFLGILLECNLNEIKEQGNNKSAGMTIGEIIGECKLFYFAGQDTTSTLLVWTMVLLSRFPEWQTRAREEVFQVFGNKTPDYDGISHLKVITMILYEVLRLYTPVAELT…
CrCYP72C	MEMDMDIIRKAIAATIFALVMAWAWRVLDWAWFTPKRIEKRLRQQGFRGNPYRFLVGDVKESGKMHQEALSNPMEFDNDIVPRLMPHINHTIKTYGRNSFTWMGRIPRIHVMEPELIKEVLTHSSKYQKNFDVHNPLVKFLLTGVGSFEGAKWSKHRRIISPAFTLEKLKSMLPAFAICYHDMLTKWEKLAEKEGSHEVDIFPTFDVLTSDVISKVAFGSTYDEGGKIFRLLKELMDLTIDCMRDVYIPGWSYLPTKRNKRMKEINKEITDMLRFIINKRMKALKAGEPGEDDLLGVLLESNIQEIQKQGNRKDGGMTINDVIEECKLFYFAGQETTGVLLTWTTILLSKHPEWQERAREEVLQAFGKNKPEFERLNHLKYVSMILYEVLRLYPPVIDL…
CrCYP72A1	MEMDMDTIRKAIAATIFALVMAWAWRVLDWAWFTPKRIEKRLRQQGFRGNPYRFLVGDVKESGKMHQEALSKPMEFNNDIVPRLMPHINHTINTYGRNSFTWMGRIPRIHVMEPELIKEVLTHSSKYQKNFDVHNPLVKFLLTGVGSFEGAKWSKHRRIISPAFTLEKLKSMLPAFAICYHDMLTKWEKIAEKQGSHEVDIFPTFDVLTSDVISKVAFGSTYEEGGKIFRLLKELMDLTIDCMRDVYIPGWSYLPTKRNKRMKEINKEITDMLRFIINKRMKALKAGEPGEDDLLGVLLESNIQEIQKQGNKKDGGMSINDVIEECKLFYFAGQETTGVLLTWTTILLSKHPEWQERAREEVLQAFGKNKPEFERLNHLKYVSMILYEVLRLYPPVIDL…
MtCYP72A63	MEVFMFPTGTTVIISVLSVLLAVIPWYLLNKLWLKPKRFEKLLKAQGFQGEPYNLSVLKDKSKQNYMLKLQQEDKSKSIGLSKEAAPSIFTPVHQTVRKYGNNSFLWEGTTPRVIITDPDQIKDVFNKIDDFPKPKLRSIAKYLSVGILDHEGKKWAKHRKIANPAFHLEKLKVMLPAFSHSCNEMISKWKELLSSDGTCEIDVWPSLQNFTCDVISRTAFGSSYAEGTKLFQLLKKQGFLLMTGRHTNNPLWGLLATTTKTKMKEIDREIHDSLEGIIEKREKALKNGETTNDDLLGILLQSNHAEKQGQGNSKNIGMTTQDVIDECKLFYLAGQETTSSLLVWTMVLLGRYPEWQARAREEVLQVFGNQNPNNEGLSQLKIVTMILYEVLRLFPPLI…
GuCYP72A154	MDASSTPGAIWVVLTVILAAIPIWVCHMVNTLWLRPKRLERHLRAQGLHGDPYKLSLDNSKQTYMLKLQQEAQSKSIGLSKDDAAPRIFSLAHQTVHKYGKNSFAWEGTAPKVIITDPEQIKEVFNKIQDFPKPKLNPIAKYISIGLVQYEGDKWAKHRKIINPAFHLEKLKGMLPAFSHSCHEMISKWKGLLSSDGTCEVDVWPFLQNLTCDVISRTAFGSSYAEGAKIFELLKRQGYALMTARYARIPLWWLLPSTTKRRMKEIERGIRDSLEGIIRKREKALKSGKSTDDDLLGILLQSNHIENKGDENSKSAGMTTQEVMEECKLFYLAGQETTAALLAWTMVLLGKHPEWQARARQEVLQVFGNQNPNFEGLGRLKIVTMILYEVLRLYPPGIY…
MtCYP72A68	MELSWETKSAIILITVTFGLVYAWRVLNWMWLKPKKIEKLLREQGLQGNPYRLLLGDAKDYFVMQKKVQSKPMNLSDDIAPRVAPYIHHAVQTHGKKSFIWFGMKPWVILNEPEQIREVFNKMSEFPKVQYKFMKLITRGLVKLEGEKWSKHRRIINPAFHMEKLKIMTPTFLKSCNDLISNWEKMLSSNGSCEMDVWPSLQSLTSDVIARSSFGSSYEEGRKVFQLQIEQGELIMKNLMKSLIPLWRFLPTADHRKINENEKQIETTLKNIINKREKAIKAGEATENDLLGLLLESNHREIKEHGNVKNMGLSLEEVVGECRLFHVAGQETTSDLLVWTMVLLSRYPDWQERARKEVLEIFGNEKPDFDGLNKLKIMAMILYEVLRLYPPVTGVARKV…
MtCYP72A67	MEASLAIYYGIILITVTLGLVYTWRVLNWIWLKPKRLEKLLREQGCNGNSYRLVLGDLKDSYKMGKKAKSKPMELSDDIIPRVIPYIQQLVQIYGKNPFIWSGTTPRLILTEPELIKDVLNRTSELQKPKYEIFKFLFSGLIIHEGEKWRKHRRLMNAAFQLEKLKIMAPSFLTSCIDMISKWESTLSSDGSGEIDIWPSLQNLTSDVISRNAFGSSYEEGKRIFDLQREQGELVMKNLVKSLIPLWRFIPTATQRRMHEIEKDIDSSLRYIINKREKAMKAGEATENDLLGLLLESNHQEIRDHGNNKNMGMSLEDVVGECKLFYLAGQESTSTMLVWTMILLSRYPDWQERAREEVLQIFGNKKPDYEGLNKLKILPMILYEVLRLYPPAFGVTRYV…
PgCYP72A219	MELVLKLISSFCAIVVVILLGWRIFNWVWLRPRKLEKYLRNQGFNGNSYRLFFGDVKEMIVMLKEAKSKPINLYDDIIPRIIPLNQKIITNYGKNSFLWLGPKPMVHIMNPDHIKDVLSKFYQFQKPRHNPLTKLLATGVADAEGDRWAKHRKLINPAFHLEKLKNMLPAIYLSSSEIVTKWEEMVSTKGQFELDVLPYLETLTSDVISRTAFGSSYEEGRKIFQLQREQAELIIQASQTIYLPGMRFLPTKRNKRMKEIAKEVKIALKSIINKRLKAMEAGERSSHDDLLGILLESNSKEIKQHGNTNFGLTVDEVIEECKLFFFAGQETTSNLLVWTMILLSQHQDWQKRAKEEVLRTFGNNKPDFDGLNHLKVVNMILLEVLRLYPPILSLDRTIY…
CrCYP72A225	MISTCHSWHMFQIRNREMDVFYRGISVLGTCFFLLLAWKMLNWAWIKPKKLEKRLRQLGLKGNSYRLLIGDLGETSQMDKEAKSKPINFTNHIIPRIMPFLHKIIQSHGKNPFIWQGPNPAVIITDPELIKEVLTKNYTYQKPPSDDLGKLISQGVAAYDKDKWAKHRRLLNPAFHIEKLKHMLPAFHLSCSEMLKKWEKLASASAEGSFELDVWPYLQDMTSDVISRTAFGSNLEEGKNIFKLQKEILEHILQILQSFYFPGMLYLPTKRIRRMKKISKEVHSSVLNIIMKRVEAMKAGEPSNDDLLGILLDSNFKEIENDNGNNSNKNCGMSFEEVIEECKLFYFAGQETTAVLLVWTLLLLSKHPEWQMRARDEVLQIFGNSEPDFDALNHLKVIT…
OsCYP714B1	MVVVVAAAMAAASLCCGVAAYLYYVLWLAPERLRAHLRRQGIGGPTPSFPYGNLADMRSHAAAAAGGKATGEGRQEGDIVHDYRQAVFPFYENWRKQYGPVFTYSVGNMVFLHVSRPDIVRELSLCVSLDLGKSSYMKATHQPLFGEGILKSNGNAWAHQRKLIAPEFFPDKVKGMVDLMVDSAQVLVSSWEDRIDRSGGNALDLMIDDDIRAYSADVISRTCFGSSYVKGKQIFDMIRELQKTVSTKKQNLLAEMTGLSFLFPKASGRAAWRLNGRVRALILDLVGENGEEDGGNLLSAMLRSARGGGGGGGEVAAAAEDFVVDNCKNIYFAGYESTAVTAAWCLMLLALHPEWQDRVRDEVQAACCGGGGRSPDFPALQKMKNLTMVIQETLRLYPA…
OsCYP714B2	MEVGMVVVVAAKVLVSLWCVGACCLAAYLYRVVWVAPRRVLAEFRRQGIGGPRPSFPYGNLADMREAVAAARHQLAEARRRRRARDSGDGGSGAGIVHDYRPAVLPFYEKWRKDYGPIFTYSMGNVVFLHVSRPDVVRDINLCVSLDLGKSSYLKATHEPLFGGGILKSNGEAWAHQRKIIAREFFLDKVKGMVDLMVDSAQTLLKSWEEGIDKNGGTIDIKIDDDIRAYSADVISRTCFGSSYIKGKNIFLKIRELQKAVSKPNVLAEMTGLRFFPIKRNKQAWELHKQVHKLILEIVKESGEERNLLRAILLSASSSKVELAEAENFIVDNCKSIYFAGYESTAVTAAWCLMLLGLHPEWQDRVREEVQEVCAGQPVDSQSLQKMKNLTMVIQETLR…
OsCYP714D1	MESFFVFFTAAALPVVVAAAVIAGLCITAAWLARPRRVAEVFRRQGIDGPPPSSFLAGNLPEMKARVAAAASAAAPTADGEETASAGGGGGGRDFEKDGFDDYCTRIFPYFHKWRKAYGETYLYWLRRRPALYVTDPELIGEIGRCVSLDMGKPKYLQKGQEPLFGGGVLKANGACWARQRKVIAPEFYMARVRAMVQLMVDAAQPLIASWESRIDAAGGAAAAEVVVDGDLRSFSFDVISRACFGSDYSRGREIFLRLRELSGLMSETSVIFSIPSLRHLPTGKNRRIWRLTGEIRSLIMELVRERRCAARAAREHGGKAAPPSPPERDFLGSIIENSGGQPRPDDFVVDNCKNIYFAGHETSAVTATWCLMLLAAHPEWQDRARAEVLEVCGGDGAA…
OsCYP714C2	MELFSSQQWLALLPPIILCILLFSYVYIILWLRPERLRQKLRSQGVRGPKPSFLFGNIPEMRRIQQLAKSAHEQEAGSTDMFSSNYVATLFPYFLHWSRVYGSIYLYSTGSIQVLNVTDPNMVKELANCKSLDLGKPCYLQKERGALLGMGILTSNGDLWVHQRKVIAPELFMERVKGMVNLMMEAAMSMLNSWKNEVEDRGGSAEIVVDEFLRTFSADVISRACFGSSFSEGKEIFIKIRQLQKAMAKQSMLIGVPGSRYLPTRSNRGIWNLDSSIRTLILNISKKYEHDSSTSVNKDLLHSIIQGSKDGPFASCTPEDFIVDNCKNIYFAGHETTSTTAAWCLMLLASHHEWQSRARVESLDICQGRPLDFDILRKLKKLTMVIQETLRLYPPASFV…
OsCYP734A6	MGWWGWAAAAAAAAAWVAVKVLEVLWWRPRRVEEHFARQGITGPRYRFLVGCVREMVALMVAASAKPMPPPYRSHNVLPRVLAFYHHWKKIYGSTFLIWFGPTPRLAIADPELIREVLLARADRFDRYESHPMVRQLEGEGLVSLRGDKWAHHRRVLTPAFHMDNLRLLLPCVGMTVLDMADKWRAMAEADKSGEVEIDVSDWFQVVTEDAITRTAFGRSYEDGKVVFKLQAQLMAFASEAFRKVFIPGYRFLPTKKNTSSWKLDKEIRKNLVTLIGRRQEAGDDEKLDGCAKDLLGLMINAAASSNGGKRSALPVSPITVNDIVEECKTFFFAGKQTTSNLLTWAIVVLAMHPEWQERARQEVLDVCGADGVPSREQLAKLKTLGMILNETLRLYPPA…
OsCYP734A4	MMEAVAVAAAVLLLLHVAARVADAVWWRPRRLEAHFAGQGVRGPPYRFLVGCVREMVALMAEATAKPMPPAAPHNALPRVLAFYHYWRKIYGPTFLIWFGPTPRLTVAEPEMVREIFLTRAEAFDRYEAHPVVRQLEGDGLVSLHGDKWAHHRRVLTPGFYPDNLNRLVPHVGRSVAALAERWRAMACAGGGEVEVDVAEWFQAVAEEAITRATFGRSYDSGRVVFRLQARLMAFASEAFRKVLVPGYRFLPTKKNRMSWGLDREIRRGLVRLIGRRSGGDGGEEDETTTELKDKQDSGFNDLLGLMINAGVDRTMPVEDMVEECKTFFFAGKQTTTNLLTWATVLLAMHPDWQDRARREVLAVCGDAAGELPTKDHLPKLKTLGMILNETLRLYPPAV…
OsCYP734A2	MEEDGGGGAGWGWATWRVAAVAAAAAVWVTMHVAARMADALWWRPRRLEAHFAAQGVRGPPYRFLLGSVREMVALMAEASSKPMSPPTSHNALPRVLAFYHYWRKIYGHRFLIWFGPTPRLTVAEPELIREIFLTRADAFDRYEAHPVVRQLEGDGLVSLHGDKWALHRRVLTDAFYPDNLNRLIPHVGKSVAALAAKWGAMAEAGGSGEVEVDVAEWFQAVTEEAITRATFGRSYDDGRVVFAMQGQLMAFASEAFRKVLVPGYRFLPTKKNRLSWRLDREIRRSLMRLIGRRSDEAEQGEKADDGSFRDLLGLMINAGAAAATRGNAGGEKNSPAAAIPVEDMLEECKTFFFAGKQTTTNLLTWATVLLAMHPDWQERARREVFDVCGAGELPSKEH…
CaCYP73A19	MDLLLLEKTLLALFIAATIAITISKLRGKRFKLPPGPIPVPVFGNWLQVGDDLNHRNLTDLAKRFGDIFLLRMGQRNLVVVSSPELAKEVLHTQGVEFGSRTRNVVFDIFTGKGQDMVFTVYGTLAEMRRIMTVPFFTNKVVQQYRFGWEFEAQSVVDDVKKNPEACSSGIVLRRRLQLMMYNIMYRIMFDRRFESEEDPLFVKLKALNGERSRLAQSFEYNYGDFIPILRPFLKGYLKLCKEVKDRRLQLFKDYFVDERKKLGSTKSTTNEGLKCAIDHILDAQQKGEINDDNVLYIVENINVAAIETTLWSIEWGIAELVNHQKIQNKVREEIDRVLGPGHQVTEPDLQKLPYLQAVIKETLRLRMAIPLLVPHMNLHDAKLSGFDIPAESKILVNA…
HtCYP73A1	MDLLLIEKTLVALFAAIIGAILISKLRGKKFKLPPGPIPVPIFGNWLQVGDDLNHRNLTDLAKRFGEILLLRMGQRNLVVVSSPELAKEVLHTQGVEFGSRTRNVVFDIFTGKGQDMVFTVYGEHWRKMRRIMTVPFFTNKVVQQYRYGWEAEAAAVVDDVKKNPAAATEGIVIRRRLQLMMYNNMFRIMFDRRFESEDDPLFLKLKALNGERSRLAQSFEYNYGDFIPILRPFLRNYLKLCKEVKDKRIQLFKDYFVDERKKIGSTKKMDNNQLKCAIDHILEAKEKGEINEDNVLYIVENINVAAIETTLWSIEWGIAELVNHPEIQAKLRHELDTKLGPGVQITEPDVQNLPYLQAVVKETLRLRMAIPLLVPHMNLHDAKLGGFDIPAESKILVN…
CXCCYP75B137	MLTFFFLWISTLLLSSFIVYLLYRRRSAQCPPLPPGPNGWPILGNLPQLGAKPHQTLDALSKQYGPLFRLRLGSVNVVVASSSAVAAQFLRTHDVNFSNRPPNSGAEHVAYNYQDLVFAPYGPRWRMLRKLCSVHLFSLKALDDLRPVRQGEVACLVRNLRRHADTGVLVNLGKALNVCATNALARAMLGRRVFADEDAQLAEADEFKEMVVELMRLAGVFNVGDFVPGLGWLDLQGVVGKMKRLHRRYDAFLDRVIEENQANAKSGDLLSVLIRLKEADAEGEIKLNNTDIKALLLNLFTAGTDTSSSTVEWVLAELIRHPDILQKTQHELDSVIGRDRLVAESDLPNLPYLQAVVKETFRLHPSTPLSLPRMASEECIVNGYKIPKHATLLVNVWSI…
CXCCYP75B138	MTMTSLDIILFISAIVFLSIYYYNLFSNAKRSNGLKLPPGPKGYPVLGNLPQLGAKPHQALQAFSRVYGPLMRLRLGSVDLVVASSPSVAAQFLKNDSNFCARPPNSGAEHMAFNYHDLVFAPYGPRWRLLRKLSAVHLLGPKALDDNQNVREEELAVLARMLYERSRGGEPVNVGKEMHVCSTNALSRAMMGRRVFEKLAVGGGGVEEEEEMKKAEEFKDMVVEVMTLAGVFNIGDFVPWLKPFDIQGVVRKMKRVHRRYNVFLDKFIAECRSSAKPGANDLLSVLIGQRGKSDGSGGEITDTAIKALVLNLLTAGTDTSSSTIEWALTELIRHPDILKKAQQEIDSAVGRDRLVTESDVPKLPYLQAIVKENFRMHPATPLSLPRMSIEECDIGGYH…
OsCYP75B3	MDVVPLPLLLGSLAVSAAVWYLVYFLRGGSGGDAARKRRPLPPGPRGWPVLGNLPQLGDKPHHTMCALARQYGPLFRLRFGCAEVVVAASAPVAAQFLRGHDANFSNRPPNSGAEHVAYNYQDLVFAPYGARWRALRKLCALHLFSAKALDDLRAVREGEVALMVRNLARQQAASVALGQEANVCATNTLARATIGHRVFAVDGGEGAREFKEMVVELMQLAGVFNVGDFVPALRWLDPQGVVAKMKRLHRRYDNMMNGFINERKAGAQPDGVAAGEHGNDLLSVLLARMQEEQKLDGDGEKITETDIKALLLNLFTAGTDTTSSTVEWALAELIRHPDVLKEAQHELDTVVGRGRLVSESDLPRLPYLTAVIKETFRLHPSTPLSLPREAAEECEVDG…
OsCYP75B4	MEVAAMEISTSLLLTTVALSVIVCYALVFSRAGKARAPLPLPPGPRGWPVLGNLPQLGGKTHQTLHEMTKVYGPLIRLRFGSSDVVVAGSAPVAAQFLRTHDANFSSRPRNSGGEHMAYNGRDVVFGPYGPRWRAMRKICAVNLFSARALDDLRAFREREAVLMVRSLAEASAAPGSSSPAAVVLGKEVNVCTTNALSRAAVGRRVFAAGAGEGAREFKEIVLEVMEVGGVLNVGDFVPALRWLDPQGVVARMKKLHRRFDDMMNAIIAERRAGSLLKPTDSREEGKDLLGLLLAMVQEQEWLAAGEDDRITDTEIKALILNLFVAGTDTTSTIVEWTMAELIRHPDILKHAQEELDVVVGRDRLLSESDLSHLTFFHAIIKETFRLHPSTPLSLPRMA…
PhCYP75A1	MMLLTELGAATSIFLIAHIIISTLISKTTGRHLPPGPRGWPVIGALPLLGAMPHVSLAKMAKKYGAIMYLKVGTCGMAVASTPDAAKAFLKTLDINFSNRPPNAGATHLAYNAQDMVFAHYGPRWKLLRKLSNLHMLGGKALENWANVRANELGHMLKSMSDMSREGQRVVVAEMLTFAMANMIGQVMLSKRVFVDKGVEVNEFKDMVVELMTIAGYFNIGDFIPCLAWMDLQGIEKRMKRLHKKFDALLTKMFDEHKATTYERKGKPDFLDVVMENGDNSEGERLSTTNIKALLLNLFTAGTDTSSSAIEWALAEMMKNPAILKKAQAEMDQVIGRNRRLLESDIPNLPYLRAICKETFRKHPSTPLNLPRISNEPCIVDGYYIPKNTRLSVNIWAIG…
EeCYP75A7	MAVGNGVLLHIAASLMLFFHVQKLVQYLWMNSRRHRLPPGPIGWPVLGALRLLGTMPHVALANMAKKYGPVMYLKVGSCGLAVASTPEAAKAFLKTLDMNFSNRPPNAGATHLAYNAQDMVFADYGPRWKLLRKLSNIHILGGKALQGWEEVRKKELGYMLYAMAESGRHGQPVVVSEMLTYAMANMLGQVMLSKRVFGSQGSESNEFKDMVVELMTVAGYFNIGDFIPSIAWMDLQGIQGGMKRLHKKFDALLTRLLEEHTASAHERKGSPDFLDFVVANGDNSEGERLQTVNIKALLLNMFTAGTDTSSSVIEWALAELLKNPIILRRAQEEMDGVIGRDRRFLEADISKLPYLQAICKEAFRKHPSTPLNLPRIASQACEVNGHYIPKGTRLSVNI…
OsCYP76M8	MENSQMWLLWGALSVALFFYFSTLRRRYAGGKPLPPGPTPLPLIGNLHLVGGGTFHHKLRDLARVHGPVMTLKLGLATNVVISSREAAIEAYTKYDRHLAARATPDTFRACGFADRSMVFIPSSDPQWKALRGIHASHVFTPRVLAAVRPIRERKVGDLIAYLRAHAGEEVLVGHAMYTGILNMVSFSYFSVDIVDMGSQMARELREVVDDIILVVGKPNVSDFYPFLRPLDLQGLRRWTTKRFNRVFSIMGDIIDRRLAHIRDNKPRHDDFLDSILELMAAGKIDRVNVLNMLFEAFVAGADTMALTLEWVMAELLKNPSVMAKARAELRDVLGDKEIVEEADAARLPYLQAVLKEAMRLHPVGALLLPHFAMEDGVEVGGYAVPKGSTVLFNAWAIM…
OsCYP76M7	MENSQVWLLWGALSVAVLFYLSTLRRRHAGGKPLPPGPTPLPLIGNLHLAGGTSFHHKLRDLARVHGPVMTLKLGLATNVVISSREAAIEAYTKYDRHLAARATPDTFRACGFADRSMVFIPSSDPRWKALRGIQGSHVFTPRGLAAVRPIRERKVGDLMAYLRAHAGEEVLLGQAMHTGLLNLVSFSYFSIDIVDMGSQMARDLREVVDDIISVVGKPNISDFYPFLRPLDLQGLRRWTTKRFNRVFSIMGDIIDRRLAHIRDNKPSHNDFLDSLLELMAAGKIDRVNVLDMLFEAFVAGADTMALTLEWVMAELLKNPGVMAKARAELRDVLGDKEVVEEADAARLPYLQAVLKEAMRLHPVGALLLPHFAVEDGVEVGGYAVPKGSTVLFNAWAIM…
CrCYP76B6	MDYLTIILTLLFALTLYEAFSYLSRRTKNLPPGPSPLPFIGSLHLLGDQPHKSLAKLSKKHGPIMSLKLGQITTIVISSSTMAKEVLQKQDLAFSSRSVPNALHAHNQFKFSVVWLPVASRWRSLRKVLNSNIFSGNRLDANQHLRTRKVQELIAYCRKNSQSGEAVDVGRAAFRTSLNLLSNLIFSKDLTDPYSDSAKEFKDLVWNIMVEAGKPNLVDFFPLLEKVDPQGIRHRMTIHFGEVLKLFGGLVNERLEQRRSKGEKNDVLDVLLTTSQESPEEIDRTHIERMCLDLFVAGTDTTSSTLEWAMSEMLKNPDKMKKTQDELAQVIGRGKTIEESDINRLPYLRCVMKETLRIHPPVPFLIPRKVEQSVEVCGYNVPKGSQVLVNAWAIGRDET…
CrCYP76A26	MATITFDSLNPVTVAISAGFLLLLIIFVKSRTGSSKRKPPGPPGWPIFGNMFDLGDLPHQTLYKLKSKYGPIVWLQLGSINTMVVQNAVSAAELFKKHDVPFCDRKVPDTLTAFNFNQGSLGMNTYGGHWRVLRRLCSMEFLVNKRMNETTDLRRRIEDNMVRWIEEDSLASKAQGGTGAVQLSRFLFLMAFNLVGNLMLSRDLMDNKDPEGREFFDCMNEILELAGTPNIADFLPLLKKLDPLGMKKRMVDNMSRTMKISSKFVQERLDNRKAGKINEKKDFLDVMLEYQGDGKDGPDKFTEQHVNIVIMEMFFAGSETTSISIEWGFTELLRNPHAFKKVREEIDRVVGVNRMVEETDMENLPYLQAVVKETLRLHPALPMLLPRNTMEDTEYMGYL…
OsCYP76M6	MEKLKSELWMTAVATCMSLLLYLTILRRRHASGGRSLALPPGPTPLPLIGNLLCLGGIFHQTLAKLARVHGPVMTLKLGLTTAVVVSSAEAAREAYTKHDQRLAARPVPDAFRANGFSERSIVFSPSSDPQWKNLRGIHATHIFSPRALAALRGIRERKVRDIVGYIRTVAGEEMCVREVVHNGVLNLISTSFFSMDMADVRSESARGLRGLIEDIIATVAGPNVSDFFPFLRQLDLQGLRRQTGSHLGIVFGLLDDIIDRRMAETRDHPDKQRHGDFLDALISLASAGKIPRYHITYLLFDVFAAGADTMTTTVEWAMAELLRNPRVMAKVRAEVTDALGGRESFDEGDAASLTYLQCVFKEAMRLHPVGSILVPHLAVQDGVEIGGYAVPKGTTVIF…
OsCYP76M5	METRELWVLAAALAVSLLYYLAALMRYAGGGCSRSSRPPLPPGPTPLPLIGNLLSLRGVLHHRLASLARVHGPVMALRLGLTTAVVVSSRDAAAEAFTKHDRRLAARVVPDSNRAHGFSDRSIIWLPSSDPRWKALRGIQATHLFSPRGLAAVRSVRESKVRDIVAYFRSRAGEEVVFGEAIYSGVLNLVSSSFFSVNMAGVGSEEAHGLRELVEDLVEAIAKPNVSDLFPFLRQLDLQGLRRRTEERMARAFGILDGIIDRRLANRTHGDRHGDFLDALLDLVSEGKMARDHVTIMLFEVFGAGSDTMSVSLEWAMAELLRNPRAMRKARAELEDAAAVVEESDAARLPYLQAVVKEAMRLHPVGPILLPHRAVEDGVEIGGYAVPRGAMVIFNAWAI…
SwCYP76B10	MDFDFLTIAIGFLFTITLYQALNFFSRKSKNLPPGPSPLPLIGNLHLLGDQPHKSLAKLAKKHGPIMGLQLGQVTTIVVTSSGMAKEVLQKQDLAFSSRSIPNAIHAHDQYKYSVIWLPVASRWRGLRKALNSNMFSGNRLDANQHLRSRKVQELIAYCRKSSQTGDAIDVGRAAFRTSLNLLSNTMFSKDLTDPYSDSAKEFKDLVWNVMVEAGKPNLVDYFPLLDKVDPQGIRKRMTIHFGKILELFGGLIDERLQQKKAKGVNDDVLDVLLTTSEESPEEIDRTHIQRMCLDLFVAGTDTTSSTLEWAMSEMLKNPEKMKAAQAELAQVIGKGKAVEEADLARLPYLRCAIKETLRIHPPVPLLIPRRTEQEVEVCGYTVPKNSQVLVNVWAISRD…
SmCYP76AH1	MDSFPLLAALFFIAATITFLSFRRRRNLPPGPFPYPIVGNMLQLGANPHQVFAKLSKRYGPLMSIHLGSLYTVIVSSPEMAKEILHRHGQVFSGRTIAQAVHACDHDKISMGFLPVASEWRDMRKICKEQMFSNQSMEASQGLRRQKLQQLLDHVQKCSDSGRAVDIREAAFITTLNLMSATLFSSQATEFDSKATMEFKEIIEGVATIVGVPNFADYFPILRPFDPQGVKRRADVFFGKLLAKIEGYLNERLESKRANPNAPKKDDFLEIVVDIIQANEFKLKTHHFTHLMLDLFVGGSDTNTTSIEWAMSELVMNPDKMARLKAELKSVAGDEKIVDESAMPKLPYLQAVIKEVMRIHPPGPLLLPRKAESDQEVNGYLIPKGTQILINAYAIGRDP…
BvCYP76AD1	MDHATLAMILAIWFISFHFIKLLFSQQTTKLLPPGPKPLPIIGNILEVGKKPHRSFANLAKIHGPLISLRLGSVTTIVVSSADVAKEMFLKKDHPLSNRTIPNSVTAGDHHKLTMSWLPVSPKWRNFRKITAVHLLSPQRLDACQTFRHAKVQQLYEYVQECAQKGQAVDIGKAAFTTSLNLLSKLFFSVELAHHKSHTSQEFKELIWNIMEDIGKPNYADYFPILGCVDPSGIRRRLACSFDKLIAVFQGIICERLAPDSSTTTTTTTDDVLDVLLQLFKQNELTMGEINHLLVDIFDAGTDTTSSTFEWVMTELIRNPEMMEKAQEEIKQVLGKDKQIQESDIINLPYLQAIIKETLRLHPPTVFLLPRKADTDVELYGYIVPKDAQILVNLWAIGR…
VaCYP76BK1	MDISAVVIVVSLISLAYYLLMRPDLRQGKSAKLPPGPYPLPVVGNIFQLGDKPNRSVTKLAKKYGPVMSLRLGSILNVVISSPEMAKEVLQKYDHVFSSRFVASSWTAHDHHNVSVPFLPVGNRWRKMRKLFRDVMLSHPRLDGGRAIRQTMIKNLYEYLLESSKTGKVVNIGAAATITSVNLTSVSLFSGQVFHFDEDESTEFKETFEGLTIAAGRPNLSDFFPIIKPFDIQGCKRQMAFYLGKLLEMFDKIVNERLKEMRTSPASARKNDMLDTLLDFCRDKENDMSLNDIKHVLVDLFVGASDTASRTIEWAITELLLHPDILAKAKEELKNVIGENKLVQESDIPNLPYMEAVIKEVFRVHPVGPFLIPRRLEEDTELSGYFIPKGTQIFVNVWS…
OsCYP78A11	MAMATATASSCVDATWWAYALPALLGADTLCAHPALLAGAVLLAFATAAVLAWAASPGGPAWAHGRGRLGATPIEGPRGLPVFGSIFALSRGLPHRALDAMSRDAAAPRARELMAFSVGETPAVVSSCPATAREVLAHPSFADRPLKRSARELLFARAIGFAPSGEYWRLLRRIASTHLFSPRRVAAHEPGRQADATAMLSAMAAEQSATGAVVLRPHLQAAALNNIMGSVFGRRYDVSSSSGAAADEAEQLKSMVREGFELLGAFNWSDHLPWLAHLYDPNHVARRCAALVPRVQAFVRGVIRDHRLRRDSSSTAADNADFVDVLLSLEAHENLAEDDMVAVLWEMIFRGTDTTALVTEWCMAEVVRNPAVQARLRAEVDAAVGGDGCPSDGDVARMP…
MeCYP79D1	MAMNVSTTIGLLNATSFASSSSINTVKILFVTLFISIVSTIVKLQKSAANKEGSKKLPLPPGPTPWPLIGNIPEMIRYRPTFRWIHQLMKDMNTDICLIRFGRTNFVPISCPVLAREILKKNDAIFSNRPKTLSAKSMSGGYLTTIVVPYNDQWKKMRKILTSEIISPARHKWLHDKRAEEADNLVFYIHNQFKANKNVNLRTATRHYGGNVIRKMVFSKRYFGKGMPDGGPGPEEIEHIDAVFTALKYLYGFCISDFLPFLLGLDLDGQEKFVLDANKTIRDYQNPLIDERIQQWKSGERKEMEDLLDVFITLKDSDGNPLLTPDEIKNQIAEIMIATVDNPSNAIEWAMGEMLNQPEILKKATEELDRVVGKDRLVQESDIPNLDYVKACAREAFRL…
MeCYP79D2	MAMNVSTTATTTASFASTSSMNNTAKILLITLFISIVSTVIKLQKRASYKKASKNFPLPPGPTPWPLIGNIPEMIRYRPTFRWIHQLMKDMNTDICLIRFGKTNVVPISCPVIAREILKKHDAVFSNRPKILCAKTMSGGYLTTIVVPYNDQWKKMRKVLTSEIISPARHKWLHDKRAEEADQLVFYINNQYKSNKNVNVRIAARHYGGNVIRKMMFSKRYFGKGMPDGGPGPEEIMHVDAIFTALKYLYGFCISDYLPFLEGLDLDGQEKIVLNANKTIRDLQNPLIEERIQQWRSGERKEMEDLLDVFITLQDSDGKPLLNPDEIKNQIAEIMIATIDNPANAVEWAMGELINQPELLAKATEELDRVVGKDRLVQESDIPNLNYVKACAREAFRLH…
LjCYP79D3	MGLMPDFLSLCHEFPWTFLLVVIFSFMIFKVTKTHLVNKSKKYKLPPGPKPWPIVGNLPEMLANRPATIWIHKLMKEMNTEIACIRLANTIVIPVTCPTIACEFLKKHDASFASRPKIMSTDIASDGFITTVLVPYGEQWKKMKRVLVNNLLSPQKHQWLLGKRNEEADNLMFYIYNKCCKDVNDGPGLVNIRIAAQHYGGNVFRKLIFNSRYFGKVMEDGGPGFEEVEHINATFTILKYVYAFSISDFVPFLRRLDLDGHRSKIMKAMRIMRKYHDPIIDDRIKQWNDGLKTVEEDLLDVLIKLKDANNKPLLTLKELKAQIIELAIEMVDNPSNAFEWALAEMINQPELLKRATEELDNVVGKERLVQESDIPKLQFVKACAREALRLHPMEYFNVP…
LjCYP79D4	MGLTPDFLSFCLEFSWTFLLVVIFFFIIFKVTKSHSVNKSKKYKLPPGPKPWPIVGNLPEMLANRPATIWIHKLMKEMNTEIACIRLANTIVIPVTCPTIACEFLKKHDASFASRPKIMSTDIASDGFLTTVLVPYGEQWKKMKRVLVNNLLSPQKHQWLLGKRNEEADNLMFYIYNKCCKDVNDGPGLVNIRIAAQHYGGNVFRKLIFNTRYFGKVMEDGGPGFEEVEHINATFTILKYVYAFSISDFIPFLRRLDLDGHRSKIMKAMGIMKKYHDPIIHDRIKQWNDGLKTVEEDLLDVLIKLKDASNKPLLTLKEIKAQITELAIEMVDNPSNAFEWALAEMLNQPELLKRATEELDNVVGKERLVQESDIPKLQFVKACAREALRLHPMEYFNVP…
SbCYP79A1	MATMEVEAAAATVLAAPLLSSSAILKLLLFVVTLSYLARALRRPRKSTTKCSSTTCASPPAGVGNPPLPPGPVPWPVVGNLPEMLLNKPAFRWIHQMMREMGTDIACVKLGGVHVVSITCPEIAREVLRKQDANFISRPLTFASETFSGGYRNAVLSPYGDQWKKMRRVLTSEIICPSRHAWLHDKRTDEADNLTRYVYNLATKAATGDVAVDVRHVARHYCGNVIRRLMFNRRYFGEPQADGGPGPMEVLHMDAVFTSLGLLYAFCVSDYLPWLRGLDLDGHEKIVKEANVAVNRLHDTVIDDRWRQWKSGERQEMEDFLDVLITLKDAQGNPLLTIEEVKAQSQDITFAAVDNPSNAVEWALAEMVNNPEVMAKAMEELDRVVGRERLVQESDIPKL…
PmCYP79D16	MEANVGFLTLCLAITLVRFLMKRYWHQSKINDKNNKAIKQHYPLPPTPKGLRPWPIVGNLPEMLMNKPTFRWIHKLMEESNTQIACIRLANVHVTPVSCPILSREILKKQDATFATRPLSISTFLITKGYITTVMVPFGEQWKKMRKVITSELLSPMRHKWLTDKRIEEADHLVRYVFNQCNNDEGSGIVDLRLATQHYCANVIKRMIFNQRYFTEEMKDGGPSVEEQNYVNAVFDMLRYIYAFSASDYISCLRGLDLDGHEKIIKDCIKLTRKRQDPVIEERIREHQKLGGNKVPVDLLDILISLKDASGQPLLSTDEIKGQVNEMIMAAVDNPSNAAEWAIAEMINQPHLFEKARQELDAVVGKERQVQESDLSQLNFVKACAREAFRLHPVAPFNV…
PmCYP79A68	MSLPYLFLDSEVTPPISLSLAFIIFMFLVKFILKTHNKNSVPVVPLPPGPSPWPIVGSLPEMWRNRPAHRWIHSLMKKLNTDIACIRLGNVHVIPVTSPEIAREFLKKNDAVFASRPVTMATKTLSSGYLTTVVGPWGDQWRKMRRVLVAEAFNPSRVHWLLGKRNEEADNLVKFLYNQCSANQNGAVVNVRIAAQFYSGSIMRKMIFNRTYFGKGREDGGPGVEEEEHVSALLTLLTYAYAFCVSDYLPWLRVFDIDGHEKKVRKAMNIVKKHQEPIVNERLQEWRDGKRNEPDDLLDVFISLKDANGQPLLSDEEIKAQTTELQLSTVDSPFNIAEWALTEMLNQPEMLKKAEEELDRVVGKKTLVQESHVPHLPYIRACAKEVMRLHPVGPFNLPH…
GeCYP81E1	MEILSLLSYSVFYLALFFIFNIVIRARKFKNLPPGPPSLPIIGNLHHLKRPLHRTFKGLSEKYGHVFSLWFGSRLVVVVSSASEFQQCFTKNDVVLANRPRFLSGKYIFYNYTTLGSTSYGEHWRNLRRITALDVLSNHRINSFSGIRRDETQRLITRLADDSSTNFAEMELSSRLYDMTFNNIMRMISGKRYYGEDCDTSDLQEASQFRDMVSELLQLSGANNKTDFMPLLRFLDFENLEKRLKDISGKTDAFLRGLIEEHRTKKERANTMIDHLLNLQDSQPEYYTDQIIKGLALAMLLAGTDSSAVTLEWSMSNLLNHPEVLKKVKDELDTHVGQDRLVDESDLPKLTYLKNVINETLRLYTPAPLLLPHSTSDECNIGGYKVPQDTIVLINAWAI…
MtCYP81E7	MGILSYLCYSLFYLSIFFIIRLLFQSRKFKNLPPGPTSLPIIGNLHHLKRPLNRTFKALTEKYGNVISLWFGSRLVVVVSSLSEFQECFTKNDVVLANRPRFLSGKYIFYNYTTLGSTSYGEHWRNLRRITSLDVLSNHRINNFAPIRRDETQRLIKKLAEDSSTKFAEVELTFRFFDMTFNNIMRMISGKRYYGDDCDISEVQEASQFRDMVSELLQLSGANNKTDFMPLLKFLDFENLEKRVKRIGEKNDVFLSGLLQEQRSKKERTNTMIDHLLNMQESQPEYYTDTIIKGLCLAMLLAGTDSSAVTLEWTMSNILNYPEVLKKVRDEVDTHVGQDRLVDESDLPKLTYLRNVIYETLRLYTPAPLLLPHSTADECIMGGYKVPRDTIVLINAWAI…
MtCYP81E9	ALFYYSLLSLSFIITIKILLKITSRRLKNLPPGPPTIPIIGNLHHLKHPLHRTFTTLSQTYGDIFSLWFGSRLVVVVSSPSLAHECFTKNDIILANRPRFLTGKYIFYNYTTLGSASYGDHWRNLRRITTIDVLSNNRLNSFLGVRRDETNRLIQKLLKDVVSEGFGFTKVELRPRLTEMTFNAMMRMISGKRYYGDDGDVSDVEEAKQFREIISEMMSLLGANNKGDFLPLLRVVDLDNLEKRCKRIAKRSNAFLEGLIEEHRRGNIHSDGGTMIDHLLKLSESQPEYYSDHLIKGLIQGMLLAGTDTSAVTIEWVMSELLNHPEVLKKAKEELDTQIGKNKLVDEQDLSKLPYLQNIISETLRLHPPAPLLLPHYSSEDCTIGEFNVPKDTIILTNV…
MtCYP81E8	MTTFYLSLIISLFFLIITLKVFFNTSRKFKNLPPGPQCLPIIGNLHQLKQPLHHTFHTLSQKYGQIFSLWFGSRLVVVVSSLTIAQECFTKNDIVLANRPHFLTGKYIGYNNTTVAQSPYGDHWRNLRRILSIEILSSHRLNSFLEIRRDEIMRLIQKLAQKSYNGFTEVELRPMFSEMTFNTIMRMVSGKRYYGNDCDVSDVEEARLFRGIIKEVVSLGGANNVGDFLGFLRWFDFDGLEKRLKKISKRTDAFLQGLIDEHRFGKRNSNTMIDHLLTQQQSQPEYYTDQIIKGLMVVMLLAGTDTSSVTIEWAMSNLLNHPEIMKKAKNELDTHIGHDRQVDEHDISKLPYLQSIVYETLRLHAAAPLLVPHLSSEDFSLGGYNIPQNTILMVNAWVI…
PsCYP82N4	MRTESIKTNRPMDLLLQYLQPISVALVVIALVWNYGRRNPTKKLAPEASGGRPIMGHLHLFNDGELTHRKLGAMADTYGPVFNIRFGSHKTLVVSDWEIVKECFTTNDKLFSNRPGTLGIKLMFYDADSVGYAPYGAYWRDLRKISTLKLLSNHRIDTIKHLRSSEVESCFESLYSQWGNGEKSGEFAPVRMDSWLGDLTFNVVARIVAGKKNFSANGDVGAQRYKAAMDEAMRLMRFFAFSDVIPSLSWLDNLRGLVREMKKCASEIDSIMATWVEEHRVKRNSGGNSQLEHDFIDVCLDIMEHSSLPGDDPDLVVKSTCLDMILGGSDTTTVTLTWAMSLLLNHPQVLQKAKEELETQVGKNRQVDDSDIPNLPFIQAIIKETMRLYPAGPLIERRT…
EcCYP82N2v2	MDSLMLAYLFPISVASIIAFVFLYNLFSSRTLKNKKIRTAPMATGAWPVLGHLHLFGSGELPHKMLAAMADKYGSAFRMKFGKHTTLVVSDTRIVKECFTTNDTLFSNRPSTKAFQLMTYDNESVAFTPYGSYWREIRKISTLKLLSNHRLQAIKDVRASEVNVCFKTLYDQCKNPSGSAPILIDMKKWFEEVSNNVVMRVIVGRQNFGSKIVQGEEEAIHYKKVMDELLRLASLSMFSDFAPLLGFVDIFQGNLSAMKRNAKKVDAILENWLEEHRKKKNSVAESQQDFMDVMLSIVEESKLSGHDADAVIKATCLAMIMGGTDTTAVSLTWIISLLMNNRHALKKAREELDALVGKDRQVEDSDLKNLVYMNAIVKETMRMYPLGTLLERETKEDCE…
PsCYP82X2	MKSLMMNKLLFLQRITDSPSTTIISTFIVTIISIVFLYTVLLIRTTKNKQKIAAPKASGAWPFIGHLKLFMKQDTQFYRTLGTMSDKYGSVFTLRLGNQAILVVSNWEMVKECFTTNDKSFSNRPSTLSTKYMLNDTNSVVFSPYGTYWREMRKILVQKLLISNQRSEALKNLKTKEIDNSFVKLNDLCNNDVSGGGTKVRMDEWLADMMFNIIARITFGYQSGGGDAPGASTTSKNVERYKKTLDEMFVVLATRFAVSDIFPSLEFIDRLRGLVKDMKILGDELNSIAGCFIEEHRQKRRESLSSLLSLSNESVGDEQDFIDVLLSIMDQSRLPGDDPDFIIKIMILEAFAGGTDSLSATLTWVLSLLLNHPNVLKRAREEIDRHVENGKQVEVSDIP…
PsCYP82X1	MELFIKLPFIQPIPFSIILVTTVSIVLLYSVFFWVTDKKKKRKKAPNAAGAWPLIGHLRLLMNDKEPLYRALGSMADKYGPAFNIRLGNQEVLVVSNWEMVKQCFGNQNDKLFSNRQTTLAAKYMLNQTTSSGFAPYGPYWRELRKIMVQQLLSKQSLESWKHLKIKEMDASFSKLNELCNNNGTGTATLIRMDEWFAELTFNVIARNVFGYQSGGRSTALTNGDTESKGERYKKTLEEALHLMSIFAVSDIFPSLEWVDRLRGLIRNMKRFGDELNSIAGCLIEEHRQKRLQSVSKSDKGVGDEQDFVDVLLSVAEKSQLPGDDPDLVIKSMILEIVSGGSETTSSTLTWALCLLLNHPHVLKKAKEELDTHVGKDRHVEESDTPKLVYINAIIKESM…
PsCYP82Y1	MAYLMIKKSIYLFFDQPTAVGTLILAFLLTLSPVIIYYEQKKRGLRRNRTAITTTPLPEASGAWPVIGHLLLFMNENDLNHVTLGHMADKYGPIFSLRFGRHRTLVVSSWEMVKECFTGTNDKLFSNRPSSLAVKLMFYDTESYGFAPYGKYWRELRKISTHKLLSNQQLEKFKHLRISEVDNSFKKLHELCSNNKQGGDTTYVASLVRMDDWFAYLTFNVIGRIVSGFQSNAVAGATNSQEKYKLAIDEVSNLMATFAVSDVVPRLGWIDRLTGLTGKMKNCGKKLDAVVGDAVEDHRQKKLKISRNNTGALTEHEEEDFIDVCLSIMEQSQIPGNHPEISVKSIALDMLSGGSDTTKLIMTWTLSLLLNHPDILDKAKEEVDTYFGKKKISDNTPVV…
HcCYP84	MDDMISMIQNMEPLPMALLFIVPFLVLLGLVSRLRRKPFPPGPKGLPIIGNMMLMDQLTHRGLDKLAKKYGGIFHMKMGYLHTVTISNPEMARQVLQVQDNIFSNRPASIAIKYLTYDRADMAFAHYGPFWRQMRKICVMKVFSRKRAESWESVRDEVDSIVKAVAANEGKSINVGDLIFNLTKNITYRAAFGSISEEGQDEFIKILQEFSRLFGAFNIADFIPWLTWVDPQGLNTRLKNARGALDKFIDTIIDEHIQKRKRNVDDVAGEVDSDMVDDLLAFYSEEAKVDESDDLQNSIKLTKDNIKAIIMDVMFGGTETVASAIEWALSELMKSPEDMKRVQQELAEVVGLDRRVEESDIEKLTFLKCTLKETLRLHPPIPLLLHETAEDTVVAGYQI…
ZmCYP89A2_1	MDATQLNRSMDATPTRLFLGALLLLVPAALLLLLRARGRRRLPPGPPSLPLLGSVVWLTNSPAEIEPLLRRLFERYGPVVALRVGARLSVFVADRRIAHEALVDRGATLADRPALASVKFLDESDNTITRASYGPVWRLLRRNLVAETLHPSRVKLFAPARAWVRRVLVEKLGEAGPDAAPPRVVETFQYAMFCLLVLMCFGERLDEPAVRAIASAQREALIYRSKNMQVFAFLPVVTKHLFRARLEKARALRRRVKELFVPLINARREYKKRGGEPRGETTFEHSYVDTLLDIKLHEDGDRPLTDDEIILLCSEFLDAGTDTTSTGLQWIMAELVKNPAIQEKLYSEIKAATDDKEGVSEEDVHKMPYLKAVILEGLRKHPPAHFVLPHKAAEEMEIG…
MpCYP89A9	MGLWFYVLTCIFICIFLQSLLKIIRNKRLPPSPPTIPIIGNIFWLLKSSKNFADLEPVLRSLRSKYGNIVTIHIGSTPSIFITCHEAAHRALVKNGTVFAGRPLALQTTQVFFPNQYTVTTSPYGPNWRMLRQNIMQIIQTSRLDEVESGNKAIPINGYFNYALFNVLNFVPFLSKIVFRRQWRDILEIRQNQVNVFLPIIKARHEKIKGKVGIEDENEQEFKPYVDTLFDMKLPSNGNKLTDEELVSMCAEFMLGGTDTTVTTWLWTMANLVKYQNIQEKLFDEIKEVVRHDEDIEEEHLKRMPYLKAVVLETLRRHPPGHFILPRAVTQDTVMDGHDIPKNAIVNFLVAEFGWDPNVWEDPMEFKPERFLRHDGEAKFDLRGTTEIKMMPFGAGKRV…
AaCYP89A2_1	GDQAMDTWIAVFLSLSLCLALFPILWRKKGRLPPGPAAFPIVGNLLWLTHPVSEFEYAVRELRDRYGPIVTLHLGSRRSIMIADRDLAHDMLVQHGAVFADRPPPSAGVRLLSTNQHNINTAGYGPQWRLLRRNLTSGLLHPSRVRQYAQSREWVLGILLSELRRSAATSGDGTAVVMGAFQHAMFCLLVLLCFGEKLDEKAIGEISSVQQDLLKFFTKLNVFNFVPMVAKYVFRGRWQRLLELRGRQREIYVPLITARRRQKEARSPGENNLHFSYVDSLLDLELPDEDGRNLSDEEIISLCSELLNAGTDTTSTALEWTMANVVKHPRVQEKLLAEMKGVMGTREVVREDDLQRLPYLKAVVMEGLRRHPPAHFVLPHKVTEEVAVGGYVIPPDAEV…
AaCYP89A2_3	NTRPPPFPIVSPSSLAGSHSMEMETWTFVLLALSIYFSLALFLGPLLRRKKQQQDLLPPGPPVLPLLGNLFWLRRPFSEIEAILRSLRPRYGTAITLQIGTRPIIFVADRALAHKILVQNGAVFADRPPTSPSARFLGQHIVSASPYGPLWRSLRRNLTAEILHPSRVRLFSVARGRVLGILLGMLGRRADAGEPVVVVESFQYAMFCLLVFMCFGEMLEEKGVREIEKAQRDFLLYVNKLQVLAFFPRIGKYLFRNRLRTIRELCRRQKEIFLPLISARRELRQQEGSRGSGTLQYSYVDSLLDLEIPDEEGGANRKLADDEIVSLCSEFLDAGTDTTSTALQWIMANLVKHQGVQARLFEEVAAVVGEGEEVREEDLGKLPYLKAVVMEGLRRHPPG…
AaCYP89A9_1	GDQAMDTWIAVFLSLSLCLALFPILWRKKGRLPPGPAAFPIVGNLLWLTHPVSEFEYAVRELRDRYGPIVTLHLGSRRSIMIADRDLAHDMLVQHGAVFADRPPPSAGVRLLSTNQHNINTAGYGPQWRLLRRNLTSGLLHPSRVRQYAQSREWVLGILLSELRRSAATSGDGTAVVMGAFQHAMFCLLVLLCFGEKLDEKAIGEISSVQQDLLKFFTKLNVFNFVPMVAKYVFRGRWQRLLELRGRQREIYVPLITARRRQKEARSPGENNLHFSYVDSLLDLELPDEDGRNLSDEEIISLCSELLNAGTDTTSTALEWTMANVVKHPRVQEKLLAEMKGVMGTREVVREDDLQRLPYLKAVVMEGLRRHPPAHFVLPHKVTEEVAVGGYVIPPDAEV…
AaCYP89A2_7	GDQAMDTWIAVFLSLSLCLALFPILWRKKGRLPPGPAAFPIVGNLLWLTHPVSEFEYAVRELRDRYGPIVTLHLGSRRSIMIADRDLAHDMLVQHGAVFADRPPPSAGVRLLSTNQHNINTAGYGPQWRLLRRNLTSGLLHPSRVRQYAQSREWVLGILLSELRRSAATSGDGTAVVMGAFQHAMFCLLVLLCFGEKLDEKAIGEISSVQQDLLKFFTKLNVFNFVPMVAKYVFRGRWQRLLELRGRQREIYVPLITARRRQKEARSPGENNLHFSYVDSLLDLELPDEDGRNLSDEEIISLCSELLNAGTDTTSTALEWTMANVVKHPRVQEKLLAEMKGVMGTREVVREDDLQRLPYLKAVVMEGLRRHPPAHFVLPHKVTEEVAVGGYVIPPDAEV…
AaCYP89A2_8	NTRPPPFPIVSPSSLAGSHSMEMETWTFVLLALSIYFSLALFLGPLLRRKKQQQDLLPPGPPVLPLLGNLFWLRRPFSEIEAILRSLRPRYGTAITLQIGTRPIIFVADRALAHKILVQNGAVFADRPPPSPSRLLGQHIVSASPYGPLWRSLRRNLTAEILHPSRVRLFSDARGRGLGILLGMLGRRADAGEPVVVVESFQYAMFCLLVFMCFGEMLEEKGVREIEKAQRDFLLYVNKLQVLAFFPRIGKYLFRNRLRTIRELCRRQKEIFLPLISARRELRQQEGSRGSGTLQYSYVDSLLDLEIPDEEGGANRKLADDEIVSLCSEFLDAGTDTTSTALQWIMANLVKHQGVQARLFEEVAAVVGEGEEVREEDLGKLPYLKAVVMEGLRRHPPGH…
AaCYP89A2_2	GDQAMDTWIAVFLSLSLCLALFPILWRKKGRLPPGPAAFPIVGNLLWLTHPVSEFEYAVRELRDRYGPIVTLHLGSRRSIMIADRDLAHDMLVQHGAVFADRPPPSAGVRLLSTNQHNINTAGYGPQWRLLRRNLTSGLLHPSRVRQYAQSREWVLGILLSELRRSAATSGDGTAVVMGAFQHAMFCLLVLLCFGEKLDEKAIGEISSVQQDLLKFFTKLNVFNFVPMVAKYVFRGRWQRLLELRGRQREIYVPLITARRRQKEARSPGENNLHFSYVDSLLDLELPDEDGRNLSDEEIISLCSELLNAGTDTTSTALEWTMANVVKHPRVQEKLLAEMKGVMGTREVVREDDLQRLPYLKAVVMEGLRRHPPAHFVLPHKVTEEVAVGGYVIPPDAEV…
AsCYP89A2	MEPWLSSLLLLLLLSLPLSFILARRRSKTSHPPLPPSQSPLPVLAHLILQRRSFFEIVHLIRRFHDTHGPIFSLSLLPGARPDVFISDASLAHAALIHHGAAFADRPLPREPNIFLTCGSRDISSSPYGPLWRLLRRNLSAQILHPTRIRLFAPARSSVLRLLLDKLRSESAGGGGRAVVLKDIFRQTMFCLLVLICFGEKLGESEIREIELPLEFLLRTFTSFNVFGVLPAATKVLFRRRWEKIVGARRRQAEVFLPLIRARQGRMENRGTGGGPGSLDYCYVDSLLELRLPDEGGRGLTDDEMVQLCHEFLTGGVDTTATLLEWTMAELVKHQDLQSKLLSEINSVVGGEDEIKEDDLERMPYLKAVVMEALRRHPPGHYVLPHAVAEDVVLNGYLI…
GeCYP93C2	MLVELAITLLVIALFIHLRPTLSAKSKSLRHLPNPPSPKPRLPFVGHLHLLDKPLLHYSLIDLSKRYGPLYSLYFGSMPTVVASTPELFKLFLQTHEASSFNTRFQTSAIRRLTYDNSVAMVPFGPYWKFIRKLIMNDLLNATTVNKLRPLRSQEIRKVLRVMAQSAESQVPLNVTEELLKWTNSTISRMMLGEAEEIRDIARDVLKIFGEYSLTDFIWPLKKLKVGQYEKRIDDIFNRFDPVIERVIKKRQEIRKKRKERNGEIEEGEQSVVFLDTLLDFAEDETMEIKITKEQIKGLVVDFFSAGTDSTAVATDWALSELINNPRVFQKAREEIDAVVGKDRLVDEADVQNLPYIRSIVKETFRMHPPLPVVKRKCVQECEVDGYVIPEGALILFNV…
GmCYP93C1v2	MLLELALGLLVLALFLHLRPTPTAKSKALRHLPNPPSPKPRLPFIGHLHLLKDKLLHYALIDLSKKHGPLFSLYFGSMPTVVASTPELFKLFLQTHEATSFNTRFQTSAIRRLTYDSSVAMVPFGPYWKFVRKLIMNDLLNATTVNKLRPLRTQQIRKFLRVMAQGAEAQKPLDLTEELLKWTNSTISMMMLGEAEEIRDIAREVLKIFGEYSLTDFIWPLKHLKVGKYEKRIDDILNKFDPVVERVIKKRREIVRRRKNGEVVEGEVSGVFLDTLLEFAEDETMEIKITKDHIKGLVVDFFSAGTDSTAVATEWALAELINNPKVLEKAREEVYSVVGKDRLVDEVDTQNLPYIRAIVKETFRMHPPLPVVKRKCTEECEINGYVIPEGALILFNVWQ…
GuCYP93C2	MLVELAITLLVIALFIHLRPTPSAKSKSLRHLPNPPSPKPRLPFVGHLHLLDKPLLHNSLIDLSKRYGPLYSLYFGSMPTVVVSTPELFKLFLQTHEASSFNTRFQTPAIRRLTYDNSVAMVPFGPYWKFIRKLIMNDLLNATTVNKLRPLRSQEIRKVLRVMALSAESQVPLNVTEELLKWTNSTISRMMLGEAEEIRDIARDVLKIFGEYSLTDFIWPLKKLKVGQYEKRIDDIFNRFDPVIERVIKKRQEIRKKRKERNGEVEEGEQSVVFLDTLLDFAEDETMEIKITKEQIKGLVVDFFSAGTDSTAVATEWALSELINNPRVLQKAREEVDAVVGKDRLVDEADVQNLPYIRSIVKETFRMHPPLPVVKRKCVQECEIDGYAIPEGALILFNV…
GmCYP93A1	MAYQVLLICLVSTIVFAYILWRKQSKKNLPPSPKALPIIGHLHLVSPIPHQDFYKLSTRHGPIMQLFLGSVPCVVASTAEAAKEFLKTHEINFSNRPGQNVAVKGLAYDSQDFLFAFAPFGPYWKFMKKLCMSELLSGRMMDQFLPVRQQETKRFISRVFRKGVAGEAVDFGDELMTLSNNIVSRMTLSQKTSENDNQAEEMKKLVSNIAELMGKFNVSDFIWYLKPFDLQGFNRKIKETRDRFDVVVDGIIKQRQEERRKNKETGTAKQFKDMLDVLLDMHEDENAEIKLDKKNIKAFIMDIFVAGTDTSAVSIEWAMAELINNPDVLEKARQEIDAVVGKSRMVEESDIANLPYLQAIVRETLRLHPGGPLVVRESSKSAVVCGYDIPAKTRLFVNV…
OsCYP93G1	MASLMEVQVPLLGMGTTMGALALALVVVVVVHVAVNAFGRRRLPPSPASLPVIGHLHLLRPPVHRTFHELAARLGPLMHVRLGSTHCVVASSAEVAAELIRSHEAKISERPLTAVARQFAYESAGFAFAPYSPHWRFMKRLCMSELLGPRTVEQLRPVRRAGLVSLLRHVLSQPEAEAVDLTRELIRMSNTSIIRMAASTVPSSVTEEAQELVKVVAELVGAFNADDYIALCRGWDLQGLGRRAADVHKRFDALLEEMIRHKEEARMRKKTDTDVGSKDLLDILLDKAEDGAAEVKLTRDNIKAFIIDVVTAGSDTSAAMVEWMVAELMNHPEALRKVREEIEAVVGRDRIAGEGDLPRLPYLQAAYKETLRLRPAAPIAHRQSTEEIQIRGFRVPAQT…
GeCYP93B1	MEPQLVAVSVLVSALICYFFFRPYFHRYGKNLPPSPFFRLPIIGHMHMLGPLLHQSFHNLSHRYGPLFSLNFGSVLCVVASTPHFAKQLLQTNELAFNCRIESTAVKKLTYESSLAFAPYGDYWRFIKKLSMNELLGSRSINNFQHLRAQETHQLLRLLSNRARAFEAVNITEELLKLTNNVISIMMVGEAEEARDVVRDVTEIFGEFNVSDFIWLFKKMDLQGFGKRIEDLFQRFDTLVERIISKREQTRKDRRRNGKKGEQGSGDGIRDFLDILLDCTEDENSEIKIQRVHIKALIMDFFTAGTDTTAISTEWALVELVKKPSVLQKVREEIDNVVGKDRLVEESDCPNLPYLQAILKETFRLHPPVPMVTRRCVAECTVENYVIPEDSLLFVNVWS…
GmCYP93E1	MLDIKGYLVLFFLWFISTILIRSIFKKPQRLRLPPGPPISIPLLGHAPYLRSLLHQALYKLSLRYGPLIHVMIGSKHVVVASSAETAKQILKTSEEAFCNRPLMIASESLTYGAADYFFIPYGTYWRFLKKLCMTELLSGKTLEHFVRIRESEVEAFLKRMMEISGNGNYEVVMRKELITHTNNIITRMIMGKKSNAENDEVARLRKVVREVGELLGAFNLGDVIGFMRPLDLQGFGKKNMETHHKVDAMMEKVLREHEEARAKEDADSDRKKDLFDILLNLIEADGADNKLTRESAKAFALDMFIAGTNGPASVLEWSLAELVRNPHVFKKAREEIESVVGKERLVKESDIPNLPYLQAVLKETLRLHPPTPIFAREAMRTCQVEGYDIPENSTILIS…
OsCYP93G2	MEEGVVGGGGAAVLVALLVTVVLAVMRSAGSRSSKRGRLPPSPMALPIIGHLHLIRPPPHRAFDRILARHGPLVYLRLGPSTHCVVIGSADVARDFLKFEASIPERPPTAVTRQLAYGKAGFAFAPYGAYWRFVKRLCMSELLGPRTVELLRPVRAAELADVLRAAQSAAERGEGVDMSHELVRMANNSIMRMVASALPGEMAEAARDCAKQVAELVGAFNAEDFVAVCRGWDLQGIGRRTNEVHARFDALLETIIEAKEEARRRSLRLGRRESSSKDLLDMLMDAAEDDTAEVKLTRDNIKAFVLDIFTAGSDTTATTVEWMLAELVNHPECMAKLRGELDAVVGRSRLVGEQDVARLPYLQAVLKETLRLRPPAVFAQRVTVEPVQVRGYTIPTDTQ…
GmCYP93A3	MAFQVLFICLISTIVFASILWRKQNKNKTLLPPSPMPLPIIGHLHLLSPTPHQDFHKLSLRYGPIIHLFLGSVPCVVASTAEAAKEFLKTHEPAFSNRPANTVAVETLTYGFQDFLFAPYGPYWKFMKKLCMSELLGGHMLDQFLPVRQXETKKFIKRVLQKGISGEAVDFGGEFITLSNNIVSRMIVSQTSTTEDENEVEEMRKLVKDAAELSGKFNISDFVSFLKRFDLQGFNKRLEKIRDCFDTVLDRIIKQREEERRNKNETVGKREFKDMLDVLFDISEDESSEIKLNKENIKAFILDILIAGTDTSAVTMEWAMAELINNPGVLEKARQEMDAVVGKSRIVEESDIANLPYLQGIVRETLRLHPAGPLLFRESSRRAVVCGYDIPAKTRLFVN…
GmCYP93A2	MAYQVLVICVVSSIVFAYIVWRKERKKKLPPSPKGLPIIGHLHLVSPIPHQDFYKLSLRHGPIMQLFLGSVPCVVASTAEAAKEFLKTHEINFSNRPGQNVAVQFLTYVFGPYGPSVKFIKKLCMSELLGGRMLDQFLPVRQQETKKFIKRVLQKGIAGEAVDFGGEFMRLSNNIISRMTMNQTSSEDEKQAEEMRMLVADVAELMGTFNVSDFIWFLKPFDLQGFNKRIRKTRIRFDAVLDRIIKQREEERRNNKEIGGTRQFKDILDVLLDIGEDDSSEIKLTKENIKAFIMDIFVAGTDTSAATMEWAMAELINNPCVLEKARQEIDAVVGNSRIIEESDIVNLPYLQAIVRETLRIHPGGPLIVRESSKSVVVCGYEIPAKTRLFVNVWAIGRDP…
OsCYP701A8	MESMLVAGAGAAAVAAVGGLVAAAALADKLVAAPPPRKNRANPPPAVPGLPIIGNLHQLKEKKPHQTFAKWSETYGPIYTIKTGASPVVVLNSTEVAKEAMIDKFSSISTRKLPKAMSVLTRKSMVAISDYGDYQKMAKRNIMIGMLGFNAQKQFRGTRERMISNVLSTLHKLVSLDPHSPLNFRDVYINELFSLSLIQSLGEDVSSVYVEEFGREISKDEIFDVLVHEMMMCAVEADWRDYFPYLSWLPNKSFDTIVSTTEFRRDAIMNALIKKQKERIARGEARASYIDFLLEAERSAQLTDDQLMLLLSESILAAADTVLVTTEWTMYEIAKNPDKQELLYQEIREACGGEAVTEDDLPRLPYLNAVFHETLRLHSPVPVLPPRFVHDDTTLAGYD…
OsCYP701A6	MEAFVPGGAGAAAAAVGGFVAAAALAERAGVIAPRKRPNAPPAVPGLPIIGNLHQLKEKKPHQTFAKWAEIYGPIYTIRTGASSVVVLNSTEVAKEAMVAKFSSISTRKLSKALTVLTRDKSMVATSDYCDFHKMVKRYVMSSMLGTSAQKQFRDIRDMMIHNMLSTFHKLVKDDPHAPLIFRDVFKDELFRLSMIQSLGEDVSSVYVDEFGRDISKEEIYNATVTDMMMCAIEVDWRDFFPYLSWVPNKSFETRVFTTETRRTAVMRALIKQQKERIVRGEAKTCYLDFLLAENTLTDEQLMMLVWEALIEAADTTLVTTEWAMYELAKNPDKQERLYQEIREVCGDETVTEEHLPRLPYLNAVFHETLRRHSPVPLIPPRFVHEDTKLAGYDVPAGT…
OsCYP701A9	MESLLAAGAGGIGVAAAAAVVAATLAVVPPKDRGNNPPPAVPGLPVIGNMHQLKEKKPHHTFTKWSKTYGPIYTIKTGASSVVVLNSTEVAKEAMIEKFSSISTKKLPKALSVISRKNMVSISDYGDFYKMAKRNIMLAILGFNAQKHFCDTRERMVSNVLSSLHKLVAVDPHSPLNFREVYTTELFGLSLIQNLGEDVCSVYVEEFGREISKEEIFHVLVHEILSCVVEPDWRDYFPYLSWLPNKSFETIVSSTEFRRDAVMNALIKRQKERIARGEARISYIDFLLEAKNSTQLTDHQLMLLLAESIAAAVDTVLVTTEWAMYELAKNPDKQEWLYREIREVCGGKAVTEEDLPRLPYLDAVLHETLRLHSPVPVLPTRFVHDDTTLAGYDVPAGTQ…
OsCYP703A3	MDPFLLSIILCSWIFVVVSWKKLNCMRRRLPPGPPRWPIFGNLLQLSPLPHKDFARFCTKYGPLVYLRLGTIDAITTDDPEVIREILIRQDEVFASRPRTLAAVHLAYGCGDVALAPLGPNWKRMRRVCMEHLLTTKRLESFAAHRALEAEHLCQFVWAKAQSGKPVNLREVLGAFSMNNVTRMLLGKQYFGLQSAGPGEAMEFMHITHELFWLLGLIYLGDYLPAWRWLDPYGCEKKMREVEKKVDDFHQKIIDEHRKAREAKKSASLDDDNKEDMDFVDVLLSLPGENGKEHMDDVEIKALMQDMIAAATDTSSVTNEWVMAEVIKNPRVLRKIQEELDGVVGRGRMVAESDLGQLTYLRCVVRESFRMHPAGPFLIPHESLKPTTIMGYDIPARTR…
EcCYP706C55	MSPSISLSLLHNLESSLSSNDFSLLSLLFLLSGALAIGFWAWRRSAEKKNSLPLPPGPAGLPLVGNLPFLDPELHTYFATLAMTYGPILKLQLGKKLGIVVTSPATAREVLKDNDVTFANRDVPIAGRVAFYGGSDIVWNSYGPEWRMFRKVCGLKMLSNHALDSVYELRRREVRRTVGYFLLQAGSPVNVGEQMFLTVLNVITSMLWGGTAQGEEKESLGADFRQAVSSLTKLLGKPNISDFYPSLARFDLQGIERQMKGLAKRFDGIFQKMIEQRLKMQRENGSESLDGGEENKDFLQFLLNLKDEEDAQTQLTTTGLKALLMDMLVGGTDSSSNTIEFAMAEIINKPKVLQNIQQELETVVGRGNVVEESHIPKLPYLQAVMKESLRLHPPVPLLI…
GaCYP706B1	MLQIAFSSYSWLLTASNQKDGMLFPVALSFLVAILGISLWHVWTIRKPKKDIAPLPPGPRGLPIVGYLPYLGTDNLHLVFTDLAAAYGPIYKLWLGNKLCVVISSAPLAKEVVRDNDITFSERDPPVCAKIITFGLNDIVFDSYSSPDWRMKRKVLVREMLSHSSIKACYGLRREQVLKGVQNVAQSAGKPIDFGETAFLTSINAMMSMLWGGKQGGERKGADVWGQFRDLITELMVILGKPNVSDIFPVLARFDIQGLEKEMTKIVNSFDKLFNSMIEERENFSNKLSKEDGNTETKDFLQLLLDLKQKNDSGISITMNQVKALLMDIVVGGTDTTSTMMEWTMAELIANPEAMKKVKQEIDDVVGSDGAVDETHLPKLRYLDAAVKETFRLHPPMPL…
ZmCYP727A5	MASPSSCNATGVPFTLLGALITAGPAAWPACVGGGRAFLRDYARRGTNALLWAGLLAVTWLLLLRVAALLRLWALGSRIPGPRALIADPGLASVLRNGGDISGFLSKLHGRYGPVVRLWVGPSQLLVSVVDPTLVKEVLSKAKDKLPLTGRTYNLACGRLALFVSSFQKVKRTRDSLKIFLNERLTVGTGQSSFKIIDAVLNRIDSIMSKDFMDTRSFSQHMAFNIISATLLGDAFFDWSDAAAYEELLMLVAKDGCFWASYTIPPFWRPSYRRYQTLCAKLKILTESVIRKSRYQNSSLHHFDQRSCQKSEGTDPHRSVLDNMMRSHCLHGAAKGPLNLEEETCGNIMGLMLHGISTSANLIGNILTRLVLFPELQDQLHEEIVSVCNKSSKVEVDDL…
ZmCYP727A4	MASPSSCNATGVPFTLLGALITAGPAAWPACVGGGRAFLRDYARRGTNALLWAGLLAVTWLLLLRVAALLRLWALGSRIPGPRALIADPGLASVLRNGGDISGFLSKLHGRYCPVVRLWVGPSQLLVSVVDPTLVKEVLSKAKDKLPLTGRTYNLACGRLALFVSSFQKVKRTRDSLKIFLNERLTVGTGQSSFKIIDAVLNRIDSIMSKDFMDTRSFSQHMAFNIISATLLGDAFFDWSDAAAYEQLLMLVAKDGCFWASYTIPPFWRPSYRRYQTLCAKLKILTESVIRKSRYQNSSLHHFDQRSCQKSEGTDPHRSVFDNMMRNHCLHGAAKGPLNLEEETCGNIMGLMLHGISTSANLIGNILTRLVLFPELQDQLHEEIVSVCNKSSKVEVDDL…
ZmCYP92C5	MELASTMSVAMALAAAIFVVLCSVVASARGRREKALKLPPGPRGWPVLGSLGALAGALPPHRALAALAARHGPLMHLRLGSYHTVVASSADAARLVLRTHDSALADRPDTAAGEITSYGYLGIVHTPRGAYWRMARRLCATELFSARRVESFQDVRAQEMRALARGLFGCAAGRRAVAVREHVAGATMRNILRMAVGEKWSGCYGSPEGEAFRRSLDEAFAATGAVSNVGEWVPWLGWLDVQGFKRKMKRLHDLHDHFYEKILVDHEERRRLAQASGGEFVATDLVDVLLQLSEESTKLESESEARLPRDGVKALIQDIIAGGTESSAVTIEWAMAELLRHPEAMAKATDELDRVVGSGRWVAERDLPELHYIDAVVKETLRLHPVGPLLVPHYARERT…
ZmCYP92C6	MSAAVALAVILAVYVVLRYISSPRGRSKPLNLPPGPRGWPVIGSLGALAGALPPHRALAALAARHGPLMHLRLGSYHAVVASSADTARLVLKVHDLAFADRPRTAAGEVASYGYLGIVHTPYGAYWRMARKLCATELFSARRVDSFERVRAQEMRALARGLFECAGRGAVAVREHVAGATLRNILRMAVGEKWSGCYGSPEGEAFRRTLDEAFAVTGAVSNVGEWVPWLGWLDLQGCVRRMKRLRAQYDRFFEQILDDHDHKKTRRERGRPGAGDSAADDDLVDVLLRLVEEDEDRPETTEASRLTRDGVKAFVQDIVAGGTESSAVTIEWAMSELLRRPDALRAATAELDRVIGHGRWVTERDLPDLPYIDAVVKETMRLHPVGPLLVPHHAREHTVV…
SaCYP736A107	MALWIWATIGVLALVHVLQTWISKGKNKNKMLPPGPRGFPIFGSLHLLGKVPNRDLYQLAQKYGDIMYMRLGLHHNVVISSSRAAELFLKTHDLTFASRPPHEGAKHIIFGQKNMSFAEYGSYWRDMRKMCMLELLSNHKINSFKAMRREEVSLLIQSVQEDANNRRVPINLSAKISSLGVDLTCRMVFGKKYKDEEFDERGFTAVMKEAIQLVAAPNLNDHIPFLAPLDLQGLTKKMKAVNKAFDAFFEKIIDDHLQSKDEERAKDFIDVMLGHLGSEGSDYRIERVHIKALMLDMFAAAVDTPSTAILWALSELLRHPQVMKKVQKELENVVGLNRMVEESDLEKLEYLDMVVKETLRLHPVVPLLLPHLSIEDCIVDGYHIPKNSRLIINAWAIGR…
MdCYP736A163	MALWIWATVGVLALVHVLQTWISKGKNKNKKLPPGPRGFPIFGSLHLLGKVPNRNLYQLAQKYGDIMYMRLGLHHNIVISSPRAAELFLKTHDLTFASRPPHEGAKHVIFGQTNMSFAEYGPYWRDMRKMCMLELLSNHKINSFKAMRREEVSLLIQSVQEDANNRRVPINLSDKIASLGVDLTCRLVFGKKYKDVEFDERGFTAVMKEAIQLVAAPNLNDHIPFLAPLDLQGLTKKMKAINKAFDAFFENIIDDHLQSKDEERTKDFVDVMLGHMGSEESDYRIERVHVKALMLDMFAASVDTPSTVILWAFSELLRHPQVMKKLQKELENVVGLNRMVEESDLEKLEYLHMVVKETLRLHPAVPLLLPHLSIEDCTVDGYHIPKNSRLIINAWAIGR…
NfCYP733A1	MMMFLVIILILVLSALLFQAWVSPKAMDAIPGSLGWPLFGETFSFISDFSSPAGIYSFINKRQQRYGKVFKSYALGRFTVFVTGKEAAKILLTGKDGMVSLNLFYTGKQVLGPTSLLQQTGEAHKRLRRLIAEPLSVDGLKKYFQFINTLAIDTLNQWQERTILVLEEASTFTLKVIGNMIMSLEPTSDEQEKFRSNFKVISSSFSSLPLKIPGTAFYRGIKARDRMYAMLDTIISDRRNGKSFQKDFLESLIKKHSKEGSEADHYDDDKLTDKQLKDNILTLLVAGHDTTTAALTWLIKFLEENPTVLERLREEHIEIQSNRESGSSLTWQEVNNMPYTNKVINETLRKATILPWFSRKAAQDFEIDGYKIKKGWSLNLDVVSIHHDPVVFPNPQKFD…
NfCYP728H8	MSFLILVVITCLTVFLLFELLKGRVYGTKNLPKGSMGFPVIGETLSFLQAQNKEQGQEWINERVVKYGPVFKTFILGSPTVVILGQAGNKFLFCSAEDVLVAQQPKTISALAGKYNIIELTGLRYKLIKRAMMSFLKLENLQNYIKHMDDLVKEMLFDEIQEKETVIQAVSCMKKITFNLACKILFAVHDEQTRDALFDDFSIAFKAFWSLPLNFPGTVYWRGLQARSRLVKRLRQIIEKRQEELLAGASSPKSDIISSLLALKAGNEEIVSDEVIVDNFISLIIASHDTSSILTCLMLWKMCRDSKIYEKVLEEQMEIAKNKKEKLTWSDLQKMKYTWRVAQELMRLIPPVFGSFRKAIKETSFAGYVIPKGWQVFWTACGTHMDNNIFENPMEFNPS…

## Sheet: 504 Blast hits
Query	Gene	Identity	E-Value	Bitscore
AtCYP720A1	Glyma.01G047300.2	77.78	8e-26	116
AtCYP78A5	Glyma.01G061100.1	63.74	0	636
AtCYP83B1	Glyma.01G078300.1	46.58	2e-125	447
AtCYP94B3	Glyma.01G112400.1	60.33	3e-165	580
AtCYP720A1	Glyma.01G122300.1	74.6	3e-24	111
AtCYP720A1	Glyma.01G122300.5	74.6	3e-24	111
AtCYP82C2	Glyma.01G135200.1	45.26	3e-128	457
SlCYP707A2	Glyma.01G153300.1	75.16	0	721
AtCYP707A1	Glyma.01G153300.3	73.15	1e-150	531
AtCYP707A1	Glyma.01G153300.4	73.15	1e-150	531
SlCYP707A2	Glyma.01G153300.5	79.29	1e-78	291
HcCYP84	Glyma.01G169200.1	77.69	0	818
AtCYP90C1	Glyma.01G170000.1	62.25	1e-147	521
AtCYP90B1	Glyma.01G175500.1	73.81	0	745
AtCYP90B1	Glyma.01G175500.2	74.36	3e-162	570
AtCYP71B33	Glyma.01G179400.1	41.22	3e-108	390
AtCYP71B34	Glyma.01G179500.1	43.19	2e-109	394
AtCYP71B12	Glyma.01G179600.1	43.94	1e-114	411
AtCYP71B34	Glyma.01G179700.1	43.38	1e-107	388
AtCYP82C4	Glyma.01G181800.1	50.76	4e-148	523
AtCYP82C4	Glyma.01G181900.1	50.28	2e-147	520
MtCYP81E8	Glyma.01G190402.1	53.65	2e-60	231
AtCYP88A3	Glyma.01G199800.1	51.55	8e-117	419
AtCYP88A3	Glyma.01G199800.2	51.54	1e-117	421
AtCYP88A3	Glyma.01G199800.3	51.07	9e-115	412
AtCYP87A2	Glyma.01G216900.1	77.23	0	759
AtCYP87A2	Glyma.01G216900.3	77.69	0	644
AtCYP76C2	Glyma.01G216966.1	48.76	7e-57	219
AtCYP71B2	Glyma.01G217000.2	38.52	5e-44	177
AtCYP97B3	Glyma.01G226502.1	79.41	3e-112	404
AtCYP90C1	Glyma.02G051600.1	62.47	7e-177	618
AtCYP90B1	Glyma.02G057500.1	64.5	0	666
AtCYP90B1	Glyma.02G057500.2	64.5	0	667
AtCYP82C4	Glyma.02G078800.1	47.61	4e-136	483
NfCYP733A1	Glyma.02G083000.2	78.06	0	633
NfCYP733A1	Glyma.02G083200.1	77.85	0	751
AtCYP78A5	Glyma.02G119600.1	63.48	0	637
AtCYP78A5	Glyma.02G119600.2	63.48	0	637
AtCYP78A5	Glyma.02G119600.3	59.38	1e-98	358
SlCYP85A1	Glyma.02G120700.1	58.54	2e-156	550
AtCYP707A4	Glyma.02G132200.1	69	0	684
AtCYP71B33	Glyma.02G156000.1	43.94	8e-114	409
AtCYP71B33	Glyma.02G156100.1	44.33	1e-112	405
GmCYP93A3	Glyma.02G176200.1	54	1e-155	548
AtCYP71A22	Glyma.02G235300.1	39.96	4e-100	363
HtCYP73A1	Glyma.02G236500.1	87.55	0	911
AtCYP90A1	Glyma.02G256800.1	78.63	0	742
AtCYP718	Glyma.02G287300.1	66.29	3e-179	626
AtCYP718	Glyma.02G287300.2	65.17	7e-134	475
NfCYP728H8	Glyma.02G290000.1	42.08	2e-110	397
AtCYP71B33	Glyma.02G298600.1	40.93	1e-108	391
MdCYP736A163	Glyma.02G298800.1	42.83	7e-110	395
AtCYP86A8	Glyma.03G008100.2	77.55	0	836
AtCYP86A8	Glyma.03G008100.3	77.55	0	836
AtCYP86A4	Glyma.03G008100.4	73.7	5e-155	546
AtCYP704A2	Glyma.03G020400.1	64.79	0	672
AtCYP704A2	Glyma.03G020400.2	64.39	0	660
CrCYP76B6	Glyma.03G021200.1	52.61	2e-152	537
AtCYP704A2	Glyma.03G021600.1	65.19	0	676
AtCYP71B36	Glyma.03G029900.1	47.31	4e-129	459
AtCYP71B10	Glyma.03G030100.1	42.35	5e-95	346
AtCYP71B37	Glyma.03G030267.1	53.88	6e-64	243
AtCYP83B1	Glyma.03G030333.1	44.83	3e-50	197
AtCYP83B1	Glyma.03G030400.1	47.73	3e-133	473
AtCYP83B1	Glyma.03G030600.1	45.7	6e-127	452
AtCYP83B1	Glyma.03G030800.1	47.27	1e-130	464
AtCYP83B1	Glyma.03G030900.1	46.73	4e-126	449
AtCYP83B1	Glyma.03G031000.1	48.95	6e-135	479
AtCYP71B27	Glyma.03G031133.1	48.51	2e-24	112
AtCYP71B37	Glyma.03G031200.3	57.65	1e-61	235
AtCYP83B1	Glyma.03G031400.1	48.16	5e-135	479
AtCYP94B3	Glyma.03G077600.1	59.39	5e-170	595
AtCYP94B3	Glyma.03G077800.1	59.39	5e-170	595
AtCYP82C4	Glyma.03G085000.3	50.3	2e-90	331
OsCYP714C2	Glyma.03G106633.1	44.9	9e-29	126
MtCYP51G1	Glyma.03G115300.1	89.21	0	886
AtCYP98A3	Glyma.03G122000.1	80.75	0	865
AtCYP94D2	Glyma.03G122300.1	58.95	9e-171	598
GmCYP93A1	Glyma.03G142000.1	66.08	0	695
GmCYP93A3	Glyma.03G142100.1	99.8	0	1025
GmCYP93A1	Glyma.03G143700.1	100	0	1028
GmCYP93A1	Glyma.03G143700.2	100	3e-172	603
VsCYP94A1	Glyma.03G160100.1	68.1	0	707
VsCYP94A1	Glyma.03G160200.1	69.8	0	718
VsCYP94A1	Glyma.03G160300.1	68.1	0	702
CrCYP76A26	Glyma.03G189900.1	49.7	1e-149	528
AtCYP94C1	Glyma.03G193500.1	56.75	4e-162	569
MtCYP72A68	Glyma.03G226800.1	65.24	0	709
MtCYP72A68	Glyma.03G226800.4	66.83	3e-158	556
AtCYP722A1	Glyma.04G030100.2	59.11	5e-153	539
AtCYP722A1	Glyma.04G030100.3	59.24	1e-141	501
AtCYP722A1	Glyma.04G030100.4	59.24	1e-141	501
SlCYP74A2	Glyma.04G035000.1	66.29	0	731
AtCYP82C3	Glyma.04G035400.1	51.12	5e-44	177
AtCYP82C3	Glyma.04G035400.2	51.12	5e-44	177
AtCYP82C3	Glyma.04G035400.3	51.12	5e-44	177
AtCYP82C4	Glyma.04G035500.1	49.14	1e-144	511
AtCYP82C4	Glyma.04G035600.1	66.73	0	714
AtCYP711A1	Glyma.04G052100.3	71.7	0	763
AtCYP71A20	Glyma.04G110400.1	43.83	3e-109	394
AtCYP76C2	Glyma.04G189700.1	51.93	5e-68	256
AtCYP76C2	Glyma.04G189700.3	54.59	2e-61	234
AtCYP76C2	Glyma.04G189700.4	54.59	2e-61	234
AtCYP714A1	Glyma.04G224800.2	65.6	2e-103	374
AtCYP714A1	Glyma.04G224850.1	53.2	8e-62	236
AtCYP96A1	Glyma.05G003000.1	46.05	2e-130	464
AtCYP96A1	Glyma.05G003100.1	46.32	4e-133	473
AtCYP96A10	Glyma.05G003200.1	47.27	2e-132	471
AtCYP734A1	Glyma.05G010200.1	78.5	0	818
AtCYP78A10	Glyma.05G019200.1	65.58	0	674
AtCYP75B1	Glyma.05G021800.1	61.64	0	640
AtCYP75B1	Glyma.05G021900.1	61.45	0	645
AtCYP75B1	Glyma.05G022100.1	60.28	2e-178	623
AtCYP71A26	Glyma.05G042500.2	44.4	3e-52	204
AtCYP71A26	Glyma.05G042500.3	44.4	3e-52	204
AtCYP71A12	Glyma.05G042600.1	43.57	1e-112	405
AtCYP71B21	Glyma.05G042800.1	44.24	2e-114	411
SlCYP707A2	Glyma.05G051900.1	54.34	8e-105	379
AtCYP78A5	Glyma.05G147100.1	53.48	2e-139	494
VvCYP716A15	Glyma.05G166900.1	52.95	2e-149	527
VvCYP716A15	Glyma.05G170400.1	39.51	7e-107	385
SaCYP736A107	Glyma.05G182800.2	62.58	0	634
SaCYP736A107	Glyma.05G182800.3	62.58	0	634
SaCYP736A107	Glyma.05G182800.4	62.58	0	634
AtCYP86A8	Glyma.05G208900.1	74.38	0	808
AtCYP86A8	Glyma.05G208981.1	74.62	0	801
MtCYP716A12	Glyma.05G220500.1	82.85	0	829
MdCYP736A163	Glyma.05G233200.1	47.42	5e-126	449
AtCYP82C4	Glyma.06G035200.1	47.37	2e-140	497
AtCYP82C4	Glyma.06G035300.1	48.37	9e-140	495
AtCYP82C4	Glyma.06G035400.1	48.65	4e-141	499
AtCYP711A1	Glyma.06G052700.1	71.76	0	762
AtCYP714A1	Glyma.06G140000.1	60.3	0	654
AtCYP71A22	Glyma.06G176100.1	42.47	2e-111	401
AtCYP71A22	Glyma.06G176200.1	42.28	7e-115	412
AtCYP75B1	Glyma.06G202300.1	66.86	0	698
AtCYP734A1	Glyma.06G215200.1	73.49	0	772
PgCYP72A219	Glyma.06G227300.2	56.5	9e-175	611
AtCYP72A15	Glyma.06G227300.3	59.76	1e-142	504
GuCYP72A154	Glyma.06G238500.1	68.21	0	727
ZmCYP727A5	Glyma.06G310800.1	41.35	5e-120	429
AtCYP90D1	Glyma.07G010700.1	63.3	2e-175	613
ZmCYP92C6	Glyma.07G039800.1	49.25	7e-141	499
AtCYP704B1	Glyma.07G043300.1	75.88	0	794
AtCYP78A9	Glyma.07G052300.1	65.58	0	685
AtCYP86A8	Glyma.07G069500.1	77.93	0	841
BvCYP76AD1	Glyma.07G083000.1	51.41	2e-148	523
BvCYP76AD1	Glyma.07G083000.2	48.19	2e-134	477
AtCYP704A2	Glyma.07G083200.1	51.43	9e-142	501
AtCYP704A2	Glyma.07G083300.1	54.28	6e-147	519
AtCYP704A2	Glyma.07G083366.1	68.75	2e-96	351
AtCYP704A2	Glyma.07G083432.1	64.74	8e-67	253
MdCYP736A163	Glyma.07G089700.1	49.8	2e-138	490
MdCYP736A163	Glyma.07G089800.1	49.01	7e-137	485
MdCYP736A163	Glyma.07G089900.1	47.6	8e-130	462
MtCYP51G1	Glyma.07G110900.1	89.44	0	892
OsCYP714C2	Glyma.07G118200.1	51.08	1e-146	518
AtCYP71B35	Glyma.07G159800.1	41.12	7e-99	359
AtCYP71B35	Glyma.07G159800.6	41.12	7e-99	359
AtCYP71B35	Glyma.07G159800.7	41.12	7e-99	359
AtCYP71B23	Glyma.07G160700.1	42.74	5e-111	399
AtCYP71B23	Glyma.07G160700.2	42.74	5e-111	399
AtCYP71B23	Glyma.07G160700.3	42.74	5e-111	399
AtCYP71B23	Glyma.07G160700.4	42.74	5e-111	399
SlCYP74D1	Glyma.07G162900.1	51.9	3e-154	543
SlCYP74D1	Glyma.07G162900.2	51.03	2e-105	381
AtCYP71A24	Glyma.07G194300.1	50.8	3e-141	499
AtCYP71A25	Glyma.07G194401.1	52.41	2e-39	162
GmCYP93C1v2	Glyma.07G202300.1	97.31	0	1011
GmCYP93C1v2	Glyma.07G202401.1	84.93	5e-27	120
AtCYP707A4	Glyma.07G212700.1	69.53	0	692
AtCYP707A4	Glyma.07G212700.2	69.53	0	692
GaCYP706B1	Glyma.07G218200.1	49.48	1e-138	491
AtCYP89A5	Glyma.07G220300.2	53.91	2e-157	554
AtCYP89A5	Glyma.07G220400.1	54.79	8e-160	561
AtCYP89A5	Glyma.07G220500.1	59.22	2e-175	613
AtCYP77B1	Glyma.07G258800.1	68.24	0	732
AtCYP71B34	Glyma.07G267100.1	43.69	8e-117	419
AtCYP86A2	Glyma.08G015600.2	72.98	1e-114	412
AtCYP86A8	Glyma.08G015650.1	80.43	2e-86	318
MtCYP716A12	Glyma.08G026900.1	80.75	0	807
MtCYP81E9	Glyma.08G089400.1	66.13	0	685
GeCYP81E1	Glyma.08G089500.1	74.9	0	790
AtCYP78A5	Glyma.08G104100.1	53.4	4e-138	489
AtCYP71B34	Glyma.08G109900.1	39.52	4e-107	386
VvCYP716A17	Glyma.08G125000.1	55.08	4e-150	529
VvCYP716A17	Glyma.08G125100.2	54.85	4e-149	526
VvCYP716A15	Glyma.08G128600.2	37.8	3e-44	177
VvCYP716A15	Glyma.08G128600.3	33.89	4e-24	110
MdCYP736A163	Glyma.08G140400.2	59.96	2e-173	607
SaCYP736A107	Glyma.08G140500.1	59.19	5e-173	605
SaCYP736A107	Glyma.08G140600.1	59.64	1e-173	607
SaCYP736A107	Glyma.08G140600.2	59.19	1e-74	278
AtCYP71A15	Glyma.08G182100.3	34.15	2e-42	171
AtCYP71A15	Glyma.08G182100.4	34.15	2e-42	171
AtCYP90D1	Glyma.08G193900.1	62.89	1e-174	611
AtCYP90D1	Glyma.08G193900.2	67.19	9e-174	608
AtCYP72A15	Glyma.08G238100.1	53.65	1e-170	597
MtCYP716A12	Glyma.08G243600.1	66.46	0	683
SlCYP85A1	Glyma.08G250000.1	77.59	0	750
SlCYP85A1	Glyma.08G250000.2	76.77	0	632
AtCYP71B33	Glyma.08G326900.1	42.18	6e-107	386
AtCYP71B33	Glyma.08G326900.3	43.55	2e-104	378
AtCYP71B23	Glyma.08G327100.1	44.12	8e-112	402
AtCYP71B23	Glyma.08G327200.1	44.29	2e-114	411
AtCYP71B33	Glyma.08G327300.2	42.38	8e-101	365
GmCYP93E1	Glyma.08G350800.1	100	0	1028
GmCYP93E1	Glyma.08G350800.2	90.25	0	907
AtCYP735A1	Glyma.08G365000.1	69.04	0	744
AtCYP735A1	Glyma.08G365000.2	74.92	1e-136	484
AtCYP88A4	Glyma.09G029400.1	65.9	0	668
AtCYP88A4	Glyma.09G029400.2	64.37	9e-131	465
GeCYP81E1	Glyma.09G048700.2	66.6	0	676
GeCYP81E1	Glyma.09G048800.1	63.82	0	660
GeCYP81E1	Glyma.09G048900.1	61.49	0	647
GeCYP81E1	Glyma.09G048900.2	59.8	2e-103	374
MtCYP81E7	Glyma.09G049100.1	60.57	0	642
GeCYP81E1	Glyma.09G049200.1	62.02	0	650
GeCYP81E1	Glyma.09G049300.1	61.82	0	650
AtCYP721A1	Glyma.09G117400.2	54.74	9e-161	565
AtCYP721A1	Glyma.09G117400.3	54.74	9e-161	565
AtCYP721A1	Glyma.09G117400.4	54.74	9e-161	565
AtCYP715A1	Glyma.09G137600.1	59.18	0	637
AtCYP71A26	Glyma.09G142200.1	49.6	6e-143	505
AtCYP71A26	Glyma.09G142500.1	49.6	9e-142	501
AtCYP71A20	Glyma.09G142666.1	53.29	6e-40	163
AtCYP76C3	Glyma.09G142800.1	47.75	2e-25	115
AtCYP71A26	Glyma.09G142900.1	49.69	6e-135	479
NfCYP728H8	Glyma.09G144300.2	49.54	2e-56	218
AtCYP720A1	Glyma.09G160900.1	72.28	0	716
MdCYP736A163	Glyma.09G186000.1	38.66	1e-82	305
MdCYP736A163	Glyma.09G186100.1	55.43	4e-84	310
MdCYP736A163	Glyma.09G186200.1	51.69	8e-141	498
MdCYP736A163	Glyma.09G186300.1	51.69	7e-140	495
MdCYP736A163	Glyma.09G186400.1	50	3e-136	483
MdCYP736A163	Glyma.09G186500.1	47.81	4e-134	476
MpCYP89A9	Glyma.09G215600.2	76.78	1e-162	570
SlCYP707A2	Glyma.09G218600.1	74.57	0	712
SlCYP707A2	Glyma.09G218600.2	79.13	0	642
AtCYP97A3	Glyma.09G252800.1	77.07	0	905
AtCYP97A3	Glyma.09G252800.2	82.35	0	858
AtCYP71A26	Glyma.09G260900.1	46.23	2e-130	464
BvCYP76AD1	Glyma.09G267301.1	54.33	1e-34	146
AtCYP71B23	Glyma.09G279100.1	43.09	1e-111	401
CrCYP76B6	Glyma.09G282300.1	57.54	2e-90	331
AtCYP86B1	Glyma.09G282700.1	65.1	0	727
AtCYP707A2	Glyma.09G282900.1	65.52	0	635
AtCYP707A2	Glyma.09G282900.2	67.24	4e-165	579
AtCYP97C1	Glyma.10G062900.1	81.37	0	863
AtCYP721A1	Glyma.10G088200.1	45.49	1e-53	209
GmCYP93A3	Glyma.10G092500.1	58.3	2e-170	597
GmCYP93A3	Glyma.10G092600.1	55.69	9e-166	581
AtCYP71B35	Glyma.10G114600.1	41.5	5e-111	399
AtCYP71B33	Glyma.10G115201.1	52.49	1e-50	199
AtCYP71B33	Glyma.10G115300.1	43.43	4e-110	396
AtCYP71B33	Glyma.10G115400.1	43.23	2e-109	394
AtCYP71B33	Glyma.10G115500.1	43.43	3e-110	397
AtCYP71B33	Glyma.10G115700.2	46.86	2e-67	255
AtCYP71B33	Glyma.10G115951.1	52.4	2e-60	231
AtCYP71B35	Glyma.10G116000.1	41.23	6e-94	343
AtCYP71B33	Glyma.10G116200.1	38.12	5e-84	310
SwCYP76B10	Glyma.10G200800.1	49.89	2e-127	454
AtCYP77A4	Glyma.10G202400.1	71	0	756
CrCYP76B6	Glyma.10G203500.1	54.25	2e-151	534
AtCYP715A1	Glyma.10G234600.1	57.09	2e-176	617
AtCYP715A1	Glyma.10G234700.1	58.9	7e-180	628
AtCYP73A5	Glyma.10G275550.1	70.97	2e-72	271
AtCYP76G1	Glyma.10G296400.1	64.03	0	659
AtCYP97B3	Glyma.11G016200.1	79.34	0	887
AtCYP97B3	Glyma.11G016200.2	81.37	0	715
AtCYP87A2	Glyma.11G026200.1	78.51	0	773
AtCYP87A2	Glyma.11G026200.2	78.45	0	652
MtCYP81E8	Glyma.11G051800.1	59.05	3e-163	573
MtCYP81E8	Glyma.11G051850.1	48.8	1e-33	142
AtCYP82C4	Glyma.11G059950.1	52.21	2e-35	148
AtCYP82C4	Glyma.11G060000.2	53.47	2e-53	208
AtCYP82C4	Glyma.11G060100.1	51.24	9e-153	538
AtCYP82C4	Glyma.11G060200.1	49.91	3e-149	526
AtCYP71B34	Glyma.11G062500.1	42.77	2e-111	401
AtCYP71B33	Glyma.11G062600.1	42.52	6e-111	399
AtCYP71A15	Glyma.11G062600.2	33.99	2e-46	184
AtCYP71B12	Glyma.11G062700.1	45.18	3e-72	270
AtCYP90B1	Glyma.11G067700.1	73.02	0	736
AtCYP90C1	Glyma.11G073300.1	59.84	3e-173	606
HcCYP84	Glyma.11G074100.1	77.5	0	816
MtCYP81E9	Glyma.11G093100.1	46.96	1e-129	461
AtCYP86B1	Glyma.11G100100.1	72.03	0	801
CrCYP76B6	Glyma.11G108300.1	52.31	7e-136	482
SlCYP74D1	Glyma.11G122700.1	52.1	2e-146	517
AtCYP83B1	Glyma.11G168428.1	46.61	1e-127	455
AtCYP86A1	Glyma.11G175900.1	72.94	0	771
AtCYP87A2	Glyma.11G176307.1	77.46	5e-28	124
AtCYP94C1	Glyma.11G185700.1	59.63	1e-163	574
LjCYP79D4	Glyma.11G197300.1	66.98	0	726
LjCYP79D3	Glyma.11G197400.1	64.98	0	702
AtCYP90A1	Glyma.11G228900.1	77.04	0	724
AtCYP78A5	Glyma.11G250200.1	53.07	4e-140	496
AtCYP89A5	Glyma.12G013700.1	54.69	2e-152	537
GeCYP93B1	Glyma.12G067000.1	50.58	8e-149	525
GeCYP93B1	Glyma.12G067100.1	50.68	4e-148	523
AtCYP94C1	Glyma.12G087200.1	63.11	6e-175	612
AtCYP703A2	Glyma.12G160400.1	76.21	0	808
SlCYP74B	Glyma.12G191400.1	63.33	4e-179	625
AtCYP712A1	Glyma.12G239100.1	47.9	2e-129	461
AtCYP735A1	Glyma.13G046400.1	71.71	0	760
LjCYP79D4	Glyma.13G051600.1	67.35	0	732
SlCYP85A1	Glyma.13G052900.2	77.44	4e-163	572
SlCYP85A1	Glyma.13G052900.3	78.23	0	768
SlCYP85A1	Glyma.13G052900.5	79.63	0	644
AtCYP82C2	Glyma.13G068500.1	48.28	6e-137	486
AtCYP82C4	Glyma.13G068800.2	49.31	7e-140	495
AtCYP82C4	Glyma.13G068800.3	49.31	7e-140	495
AtCYP82C4	Glyma.13G068800.4	49.31	7e-140	495
PhCYP75A1	Glyma.13G072100.1	73.97	0	692
VsCYP94A2	Glyma.13G120500.1	65.18	0	670
AtCYP97C1	Glyma.13G147500.1	80.19	0	859
AtCYP97C1	Glyma.13G147500.2	78.69	0	832
AtCYP94C1	Glyma.13G152202.1	57.81	6e-157	552
AtCYP94C1	Glyma.13G152202.2	58.23	5e-156	549
GmCYP93C1v2	Glyma.13G173401.1	100	0	1036
GmCYP93C1v2	Glyma.13G173500.1	100	0	1036
AtCYP71A24	Glyma.13G181900.1	49.9	3e-136	483
SlCYP710A11	Glyma.13G217400.1	67.83	0	696
GuCYP72A154	Glyma.13G261700.1	64.3	0	681
MtCYP72A63	Glyma.13G261800.1	61.26	6e-83	306
MtCYP72A68	Glyma.13G262000.1	62.16	0	671
MtCYP72A68	Glyma.13G262100.1	62.19	0	674
CrCYP76B6	Glyma.13G265300.1	50.1	2e-136	484
MtCYP72A68	Glyma.13G277100.1	63.41	0	692
MtCYP72A68	Glyma.13G277100.2	63.41	0	692
AtCYP82C4	Glyma.13G285300.3	44.96	1e-122	438
AtCYP701A3	Glyma.13G371400.1	64.26	0	631
AtCYP701A3	Glyma.13G371400.5	64.26	0	631
MdCYP736A163	Glyma.14G015100.1	42.45	9e-113	405
AtCYP718	Glyma.14G027600.3	64.71	2e-84	311
AtCYP718	Glyma.14G027651.1	67.46	2e-51	201
AtCYP90A1	Glyma.14G059900.1	78.68	0	749
AtCYP90A1	Glyma.14G059900.2	77.83	0	695
SlCYP74A2	Glyma.14G078600.1	72.01	0	637
SlCYP707A1	Glyma.14G082900.1	71.31	0	677
AtCYP711A1	Glyma.14G096900.1	71.46	0	669
AtCYP711A1	Glyma.14G096900.2	69.8	1e-135	481
AtCYP71B23	Glyma.14G117200.1	43.15	1e-113	408
AtCYP86A1	Glyma.14G192500.1	74.51	0	777
HtCYP73A1	Glyma.14G205200.1	86.93	0	906
AtCYP701A3	Glyma.15G002200.1	65.17	3e-176	616
AtCYP71B37	Glyma.15G050300.1	42.58	1e-106	385
SlCYP710A11	Glyma.15G095000.1	68.1	0	698
AtCYP88A4	Glyma.15G135200.1	66.67	0	682
GeCYP81E1	Glyma.15G156100.1	60.56	0	641
AtCYP82C4	Glyma.15G203500.1	45.52	3e-129	460
MtCYP72A67	Glyma.15G243300.2	61.05	0	644
MtCYP72A67	Glyma.15G243300.3	61.05	0	644
MtCYP72A67	Glyma.15G243300.5	61.05	0	644
MtCYP72A68	Glyma.15G243350.1	52.08	1e-21	102
MtCYP72A67	Glyma.15G243400.1	69.96	2e-107	388
MtCYP72A67	Glyma.15G243400.3	65.53	4e-133	473
MtCYP72A68	Glyma.15G244250.1	66.41	0	722
MtCYP72A68	Glyma.15G244250.2	66.41	0	722
MtCYP72A68	Glyma.15G244250.3	66.28	0	721
GuCYP72A154	Glyma.15G245100.1	65.58	4e-179	625
GuCYP72A154	Glyma.15G245300.1	61.14	0	662
ZmCYP92C6	Glyma.16G008600.1	48.87	3e-140	496
ZmCYP92C6	Glyma.16G008600.2	48.87	3e-140	496
AtCYP78A9	Glyma.16G021200.1	65.69	0	676
AtCYP94B3	Glyma.16G057100.1	57.06	9e-161	565
AtCYP724A1	Glyma.16G068100.1	55.36	3e-150	530
AtCYP724A1	Glyma.16G068100.2	51.29	2e-133	474
SlCYP707A2	Glyma.16G076600.1	75.05	0	705
SlCYP707A2	Glyma.16G076600.2	74.68	5e-168	588
AtCYP82C2	Glyma.16G089700.1	47.98	5e-135	479
AtCYP82C2	Glyma.16G089900.1	48.18	8e-136	482
AtCYP82C4	Glyma.16G090000.1	45.3	3e-125	447
AtCYP82C4	Glyma.16G090000.2	43.27	4e-116	416
SlCYP707A2	Glyma.16G109300.1	74.78	0	705
SlCYP707A2	Glyma.16G109300.2	72.45	3e-146	516
NfCYP733A1	Glyma.16G110700.1	73.57	4e-57	220
NfCYP733A1	Glyma.16G110700.2	73.57	4e-57	220
NfCYP733A1	Glyma.16G110700.3	73.57	4e-57	220
NfCYP733A1	Glyma.16G110700.4	73.57	4e-57	220
NfCYP733A1	Glyma.16G110700.5	75.21	9e-48	189
NfCYP733A1	Glyma.16G110700.6	75.21	9e-48	189
NfCYP733A1	Glyma.16G110700.7	75.21	9e-48	189
HcCYP84	Glyma.16G131200.1	74.09	0	789
AtCYP722A1	Glyma.16G133800.1	46.22	2e-104	377
MtCYP81E8	Glyma.16G149300.2	77.76	0	790
NfCYP733A1	Glyma.16G168600.1	72.8	0	694
NfCYP733A1	Glyma.16G168900.1	71.21	0	640
AtCYP715A1	Glyma.16G182600.1	59.49	0	637
AtCYP71A26	Glyma.16G195500.1	49.37	6e-132	469
AtCYP71A26	Glyma.16G195600.1	49.21	1e-142	504
AtCYP720A1	Glyma.16G210300.1	71.75	0	717
AtCYP720A1	Glyma.16G210300.2	71.75	0	717
AtCYP720A1	Glyma.16G210300.3	71.75	0	717
AtCYP720A1	Glyma.16G210300.4	71.75	0	717
AtCYP720A1	Glyma.16G210300.5	76.32	3e-172	603
AtCYP71B34	Glyma.17G007200.1	42.15	3e-107	387
AtCYP77B1	Glyma.17G015400.1	67.64	0	729
AtCYP75B1	Glyma.17G077700.3	62.98	0	642
AtCYP78A10	Glyma.17G080500.1	65.52	0	672
AtCYP734A1	Glyma.17G118100.1	78.52	0	812
AtCYP71A12	Glyma.17G125200.1	43.94	3e-43	174
AtCYP71B37	Glyma.17G125300.1	45.02	3e-117	420
AtCYP71A12	Glyma.17G125400.1	44.18	1e-113	408
SlCYP707A2	Glyma.17G133900.1	70.26	0	674
EcCYP706C55	Glyma.17G134100.1	63.24	0	654
EcCYP706C55	Glyma.17G134200.1	63.19	0	664
AtCYP71B23	Glyma.17G209100.1	43.45	3e-112	403
AtCYP711A1	Glyma.17G227500.1	73.25	0	758
AtCYP711A1	Glyma.17G227500.2	73.81	0	737
AtCYP711A1	Glyma.17G227500.3	72.29	2e-163	573
SlCYP707A1	Glyma.17G242200.1	70.28	0	670
SlCYP74A2	Glyma.17G246500.1	69.23	0	751
AtCYP721A1	Glyma.17G249400.1	48.81	2e-138	491
AtCYP721A1	Glyma.17G249400.2	48.81	1e-139	494
AtCYP83B1	Glyma.17G255900.1	43.22	4e-120	429
AtCYP90A1	Glyma.18G028300.1	76.97	0	733
AtCYP90A1	Glyma.18G028300.2	76.97	0	733
OsCYP714C2	Glyma.18G049500.1	51.3	3e-153	540
OsCYP714C2	Glyma.18G049500.2	55.16	2e-139	494
LjCYP79D4	Glyma.18G052200.1	63.3	2e-165	580
NfCYP728H8	Glyma.18G052400.1	57.11	4e-166	582
AtCYP71B24	Glyma.18G080100.1	55.75	2e-52	205
AtCYP71B26	Glyma.18G080100.2	54.37	4e-47	187
AtCYP71B26	Glyma.18G080200.1	42.24	1e-107	388
AtCYP71B26	Glyma.18G080200.2	40.35	3e-99	360
AtCYP71B6	Glyma.18G080300.1	43.8	1e-111	401
AtCYP71B34	Glyma.18G080400.1	40.16	1e-101	368
AtCYP71A22	Glyma.18G080601.1	33.33	2e-33	142
AtCYP71A22	Glyma.18G080601.2	33.33	2e-33	142
AtCYP83B1	Glyma.18G100500.1	45.67	9e-126	448
AtCYP714A1	Glyma.18G218500.3	43.2	2e-123	441
AtCYP714A1	Glyma.18G218600.1	41.01	2e-118	424
AtCYP714A1	Glyma.18G218600.2	39.43	7e-109	392
CrCYP76B6	Glyma.18G222900.1	45.89	1e-131	468
AtCYP76C7	Glyma.18G223000.1	58.17	5e-68	256
CrCYP76B6	Glyma.18G223100.1	45.34	1e-128	458
SmCYP76AH1	Glyma.18G223100.2	41.95	2e-59	228
BvCYP76AD1	Glyma.18G223100.3	44.39	2e-89	328
SmCYP76AH1	Glyma.18G223100.4	41.95	2e-59	228
AtCYP97A3	Glyma.18G239900.1	79.12	0	910
AtCYP97A3	Glyma.18G239900.2	83.49	0	724
AtCYP97A3	Glyma.18G239900.3	80.35	0	830
MtCYP716A12	Glyma.18G265600.1	47.14	8e-26	116
SlCYP85A1	Glyma.18G272300.1	78.23	0	756
AtCYP735A1	Glyma.18G297200.1	69.36	0	752
AtCYP735A1	Glyma.18G297200.2	66.05	7e-150	528
AtCYP96A10	Glyma.19G003400.2	46.47	2e-129	461
AtCYP96A2	Glyma.19G003466.1	40.67	1e-29	129
AtCYP96A1	Glyma.19G003532.1	51.43	2e-23	108
AtCYP96A1	Glyma.19G003600.1	44.34	2e-125	447
AtCYP96A10	Glyma.19G004300.2	47.84	3e-66	251
AtCYP82C4	Glyma.19G014600.1	47.34	1e-134	478
AtCYP82C4	Glyma.19G014700.1	50.1	2e-141	501
AtCYP82C2	Glyma.19G014800.2	50.36	8e-115	412
AtCYP82C4	Glyma.19G015000.1	47.93	8e-144	508
AtCYP82C4	Glyma.19G015200.1	48.29	2e-134	478
AtCYP82C4	Glyma.19G015300.1	48.29	6e-134	476
HcCYP84	Glyma.19G018300.1	84.06	1e-101	368
SlCYP85A1	Glyma.19G033900.1	79.18	0	775
AtCYP735A1	Glyma.19G046266.1	61.54	7e-28	123
AtCYP96A1	Glyma.19G057300.1	42.83	1e-127	455
AtCYP94B1	Glyma.19G090800.1	55.67	1e-159	561
AtCYP98A3	Glyma.19G126000.1	80.36	0	861
AtCYP712A1	Glyma.19G144600.1	49.6	4e-144	509
GmCYP93A2	Glyma.19G144700.1	100	0	1011
GmCYP93A1	Glyma.19G146800.1	95.48	0	991
VsCYP94A1	Glyma.19G162100.1	70	0	718
AtCYP78A5	Glyma.19G240800.1	63.1	2e-180	630
AtCYP78A9	Glyma.19G258700.1	66.04	0	691
AtCYP86B1	Glyma.20G002700.1	67.33	0	749
AtCYP96A10	Glyma.20G004700.1	45.84	2e-123	441
AtCYP71B24	Glyma.20G006700.3	53.23	3e-56	218
AtCYP71B33	Glyma.20G006900.3	41.95	3e-62	237
AtCYP71B34	Glyma.20G007000.1	43.64	1e-110	398
AtCYP71B23	Glyma.20G007100.1	42.94	5e-109	393
AtCYP71B33	Glyma.20G007202.1	55.12	2e-60	231
AtCYP71B33	Glyma.20G007202.2	56.04	1e-53	209
AtCYP71A22	Glyma.20G008200.4	33.47	7e-35	146
GaCYP706B1	Glyma.20G014801.1	39.52	7e-29	127
GaCYP706B1	Glyma.20G014801.2	39.52	7e-29	127
AtCYP89A5	Glyma.20G018600.1	56.64	2e-166	583
AtCYP89A5	Glyma.20G018800.1	58.28	1e-173	607
AtCYP89A5	Glyma.20G018900.1	58.4	3e-172	603
PhCYP75A1	Glyma.20G041700.2	75.06	1e-177	621
PhCYP75A1	Glyma.20G041700.3	74.54	3e-166	583
LjCYP79D4	Glyma.20G065000.1	64.55	0	684
LjCYP79D4	Glyma.20G065100.1	61.09	0	657
AtCYP73A5	Glyma.20G114200.1	62.68	0	643
CrCYP76B6	Glyma.20G147900.1	52.87	6e-147	519
CrCYP76B6	Glyma.20G148000.1	52.35	3e-146	516
AtCYP715A1	Glyma.20G159600.2	62.43	6e-126	449
AtCYP715A1	Glyma.20G159700.1	58.68	0	641
AtCYP715A1	Glyma.20G159700.2	64.07	1e-163	574
AtCYP715A1	Glyma.20G159700.3	53.33	3e-115	414
AtCYP77A4	Glyma.20G188000.1	71.89	0	757
SwCYP76B10	Glyma.20G189600.1	48.79	2e-124	444
AtCYP714A2	Glyma.03G106567.1	46.15	1e-19	96.3
AtCYP86A1	Glyma.03G129200.1	53.09	3e-14	78.2
OsCYP714C2	Glyma.07G118132.1	40.18	4e-17	87.8
AtCYP704B1	Glyma.16G011701.1	67.74	7e-18	90.5
AtCYP704B1	Glyma.16G011701.2	67.74	7e-18	90.5
AtCYP704B1	Glyma.20G152267.1	44.12	3e-19	95.1
AtCYP704A2	Glyma.20G152333.1	49.09	7e-20	97.1

## Sheet: 346 GmP450s Sequences
List of GmP450s along with their type, designated clan, family number, their gene ID and protein sequence
Type	Clan	Family	Glyma ID	Protein sequence
A-Type	Clan71	CYP701	Glyma.13G371400.1	MHAMEFLTLSVTVAAAAFSILFFFLRHAGAGAGSLPPVPAVPGLPVIGNLLQLKEKKPYKTFTQMAHKHGPIYSIRTGASTLIVLNSPLLAKEAMVTRFSSISTRKLSNALKILTSDKCMVATSDYNEFHKTVKRHILTNFLGANAQKRHHIHREAMMENILSQFSEHVKTFSDLAVNFRKIFVTQLFGLALKQALGSNVETIYVEELGSTLSKEDIYKILVVDIMEGAIEVDWRDFFPYLKWIPNRRLEMKIQNLYVRRKAVMKALMNEQKNRMASGKEVNCYFDYLVSEAKELTEDQISMLIWETIIETSDTTLVTTEWAMYELAKDKTRQDRLYEELQYVCGHENVIEDQLSKLPYLGAVFHETLRKHSPAPIVPLRYAHEDTKLGGYHIPAGSEI…
	Clan71	CYP701	Glyma.15G002200.1	MESLTLSVTVAVVAFSILLFLLLLTRRHAGVGAGAGAGSLPPVPAVPGLPVIGNLLQLKEKKPYKTFTHMTHKHGPIYSIRTGASTLIVLNSPHLAKEAMVTRFSSISTRKLSNALKILSSDKCMVATSDYNEFHKTVKRHILTNLSGANAQKRHRIRREAMMENILSQFSEHIKTFSDLAANFRKIFATQLFGLALKQALGSNVETIYVEELGSTLSKEDIYKILVVDISEGAIEVDWRDFFPYLKWIPNRRMEMKIQNLHVRRKAVMKALMNEQKNRMASGKKVHCYFDYLVSEAKELTEDQISMLIWETIIGTSDTTLVTTEWAMYELAKDKTRQDRLYEELQYVCGHENVIEDQLSKLPYLGAVFHETLRKHSPAPMVPPRYVHEDTQLGGYHIP…
	Clan71	CYP703	Glyma.12G160400.1	MDLTTFISTLFLGTLASRIIRHWLIGRSLSSHKNKLPPGPPRWPIVGNLLQLGQLPHRDLASLCDKYGPLVYLKLGKIDAITTNDPDIIREILLSQDDVFASRPHTFAAVHLAYGCGDVALAPLGPHWKRMRRICMEHLLTTKRLESFSNHRLDEAQHLVKDVMAWAQDKKPINLREVLGAFSMNNVTRMLLGKQYFGSESSGPQEAMEFMHITHELFWLLGVIYLGDYLPIWRWVDPYGCEKKMREVEKRVDDFHSNIIEEHRKARKDRKGKRKEGDGDMDFVDVLLSLPGEDGKEHMDDVEIKALIQDMIAAATDTSAVTNEWAMAEVMKHPHVLHKIQEELDTIVGPNRMVLESDLPHLNYLRCVVRETFRMHPAGPFLIPHESLRATTINGYHIP…
	Clan71	CYP706	Glyma.07G218200.1	MLLSSFCVTWPYLWCWDSTSLHPILTILVTLISVLCLLRWFKNSSYEATLPSPLPPGPLGLPLLGYLPFLGTNPHLKFHKLAQVYGPIYKLMLGTKTFIVVSSPSLVKEIVRDQDTVFANRDPPISVLVALYGGTDIASLPLGPRWRKARKIFVSEMLSNTNISSSFSHRKIEVKKSIRDVYEKKIGCPISISELAFLTATNAIMSMIWGETLQGEEGAAIGAKFRAFVSELMVLVGKPNVSDLYPALAWLDLQGIETRTRKVSQWIDKFFDSAIEKRMNGTGEGENKSKKKDLLQYLLELTKSDSDSASMTMNEIKAILIDIVVGGTETTSTTLEWVVARLLQHPEAMKRVHEELDEAIGLDNCIELESQLSKLQHLEAVIKETLRLHPPLPFLIPRC…
	Clan71	CYP706	Glyma.17G134100.1	MLPFSTLFQTPLTTEYWYNHPTTTLLAFLLISLVTCYAWLKPKAQRLPPGPSGLPFFGNLLSLDPDLHTYFAVLAQIHGPIFKLQLGSKLCIVLTSPPMARAVLKENDTVFANRDVPAAGRAASYGGSDIVWTPYGPEWRMLRKVCVAKMLSHATLDTVYDLRREEVRKTVSYLHDRVGSAVNIGEQVFLTVINVITNMLWGGVVEGAERESMGAEFRELVAEMTQLLGKPNVSDFFPGLARFDLQGVEKQMNALVPRFDGIFERMIGERKKVELEGAERMDFLQFLLKLKEEGGDAKTPLTITHVKALLMDMVVGGTDTSSNTIEFAMAEMMHNPEIMKRVQEELEVVVGKDNTVEESHIHKLSYLQAVMKETLRLHPVLPLLVPHCPSETTIVGGYT…
	Clan71	CYP706	Glyma.17G134200.1	MVASLSTLVLLLCVISTVAWYSCLYFLKLNNNTQKKTLPPGPPGLPIFGNLLSLDPDLHTYFAGLAQIHGPILKLRLGSKLSIVITSPAMAREVLKENDTVFANRDVPAAGRSATYGGSDIAWTPYGPEWRMLRKVCVLKMLSNATLDSVYDLRRNEMRKTVSYLYGRVGSAVNIGEQVFLTVMNVITNMMWGGAVEGAERESMGAEFRELVAEITQLLGKPNVSDFFPGLARFDLQGVEKQMHALVGRFDGMFERMIDRRTKVEGQDGESREMKDFLQFLLKLKDEAGDSKTPLTIIHVKALLMDMVTGGTDTSSNTIEFAMAEMMHNPEIMKRVQEELEVVVGKDNMVEESHIHKLSYLQAVMKETLRLHPVLPLLIPHCPSETTNVGGYRIPKGSQ…
	Clan71	CYP71	Glyma.01G179400.1	MEAQASFLFISLFFSLVLHLLAKHYYKPKTTLSHKLPPGPKKLPLIGNLHQLAMAGSLPHRTLRDLALKYGPLMHLQLGEISSVVVSSPNMAKEIMKTHDLAFVQRPQFLPAQILTYGQNDIVFAPYGDYWRQMKKICVSELLSAKRVQSFSHIREDETSKFIESIRISEGSPINLTSKIYSLVSSSVSRVAFGDKSKDQEEFLCVLEKMILAGGGFEPDDLFPSMKLHLINGRKAKLEKMHEQVDKIADNILREHQEKRQRALREGKVDLEEEDLVDVLLRIQQSDNLEIKISTTNIKAVILDVFTAGTDTSASTLEWAMAEMMRNPRVREKAQAEVRQAFRELKIIHETDVGKLTYLKLVIKETLRLHAPSPLLVPRECSELTIIDGYEIPVKTKVM…
	Clan71	CYP71	Glyma.01G179500.1	MEAQACFMFTTLFFFWVLHWLAKYYYKPKTTLSHKLPPGPKKLPLIGNLHQLAMAGSLPHRTLRDLALKYGPLMHLQLGEISSVVVSSPNMAKEIMKTHDLAFVQRPQFLPAQILTYGQSDIAFAPYGDYWRQMKKICVSELLSAKRVQSFSDIREDETAKFIESVRTSEGSPVNLTNKIYSLVSSAISRVAFGNKCKDQEEFVSLVKELVVVGAGFELDDLFPSMKLHLINGRKAKLEKMQEQVDKIVDNILKEHQEKRERARREGRVDLEEEDLVDVLLRIQQSDNLEIKITTTNIKAIILDVFTAGTDTSASTLEWAMAEMMRNPRVREKAQAEVRQAFRELKIINETDVEELIYLKLVIKETLRLHTPSPLLLPRECSKRTIIDGYEIPVKTKVM…
	Clan71	CYP71	Glyma.01G179600.1	MEAQTYFLVIALSLFILLNWLAKYLKLKPNVAHKLPPGPKKLPLIGNMHQLAVAGSLPHRALQKLAHIYGPLMHLQLGEISAVVVSSPNMAKEITKTHDVAFVQRPQIISAQILSYGGLDVVFAPYGDYWRQMRKVFVSELLSAKRVQSFSFIREDETAKFIDSIRASEGSPINLTRKVFSLVSASVSRAAIGNKSKDQDEFMYWLQKVIGSVGGFDLADLFPSMKSIHFITGSKAKLEKLLNRVDKVLENIVREHLERQIRAKDGRVEVEDEDLVDVLLRIQQADTLDIKMTTRHVKALILDVFAAGIDTSASTLEWAMTEMMKNSRVREKAQAELRKVFGEKKIIHESDIEQLTYLKLVIKETLRLHPPTPLLIPRECSEETIIGGYEIPVKTKVMI…
	Clan71	CYP71	Glyma.01G179700.1	MEYSPLSIVITFFVFLLLHWLVKIYKQKSRYKLPPSPWRLPIIGNLHQLALAASLPDQALQKLVRKYGPLMHLQLGEISALVVSSPKMAMEVMKTHDVHFVQRPQLLAPQFMVYGATDIVFAPYGDYWRQIRKICTLELLSAKRVQSFSHIRQDENRKLIQSIHSSAGSSIDLSGKLFSLLGTTVSRAAFGKENDDQDELMSLVRKAITMTGGFELDDMFPSLKPLHLLTRQKAKVEHVHQRADKILEDILRKHMEKRTIGKEGSNEAEQEDLVDVLLRLKESGSLEVPMTMENIKAVIWNIFASGTDTPASTLEWAMSEMMKNPRVREKAQAELRQTFKGKEIIRETDLEELSYLKSVIKETLRLHPPSQLIPRECIKSTNIDGYDIPIKTKVMINTW…
	Clan71	CYP71	Glyma.02G156000.1	MEAQTYFLVIALFFLLHWLAKCYKSSVVSHKLPPGPKKLPIIGNLHQLAEAGSLPHHALRDLAKKYGPLMHLQLGEISAVVASSPKMAKEIVKTHDVSFLQRPHLVFGQMISYGGLGIAFAPYGDHWRQMRKMCATELLSAKRVQSFASIREDEAAKFINSIREAAGSPINLTSQIFSLICASISRVAFGGIYKEQDEFVVSLIRKIVESGGGFDLADVFPSIPFLYFITGKMAKLKKLHKQVDKVLENIIREHQEKKKIAKEDGAEVEDQDFIDLLLKIQQDDTMDIEMTTNNIKALILDIFAAGTDTSASTLEWAMAEMMRNPRVREKAQAELRQTFREKEIIHESDLEQLTYLKLVIKETFRVHPPTPLLLPRECSQPTIIDGYEIPTKTKVMVNA…
	Clan71	CYP71	Glyma.02G156100.1	MEAQTFFLVIALFFLLHWLAKCYNSSVCHKLPPGPKKLPIIGNLHQLAEAGSLPHHALRDLAKKYGPLMHLQLGEISAVVASSPKMAKEIVKTHDVSFLQRPHLVFGQMISYGGLGIAFAPYGDHWRQMRKMCATELLSAKRVQSFASIREDEAAKFIDLIRESAGSPINLTSRIFSLICASISRVAFGGIYKEQDEFVVSLIRKIVESGGGFDLADVFPSIPFLYFITGKMARLKKLHKQVDKVLENIIKDHHEKNKSAKEDGAEVEDQDFIDLLLRIQQDDTLGIEMTTNNIKALILDIFAAGTDTSSSTLEWTMTEMMRNPTVREKAQAELRQTFREKDIIHESDLEQLTYLKLVIKETLRVHPPTPLLLPRECSQLTIIDGYEIPAKTKVMVNAY…
	Clan71	CYP71	Glyma.02G235300.1	MEHQLITFLSFLLYSLSFILFLFQILKVGKRSKVKTMNLPPGPWKLPIIGSIHHMIGFLPHHRLRELALKHGPLMHLKLGEVPAIVVSSPEVAKEVMKTYDSIFAQRPHQVGADIMCYGSTDIATAPLGGYWKQLRRICSQELLSNKRVRSYQSIREEEVLNLMRLVDANTRSCVNLSEKVSCMTSAITARATFGEKCKDQEDFISLVKKLLKLVERLFVFDIFPSHKWLHVISGEISKLEELQREYDMIIGNIIRKAEKKTGEVEVDSLLSVLLNIKNHDVLEYPLTIDNIKAVMLNMFGAGTDTSSAVIEWTMSEMLKNPRVMTKAQEEVRRVFGSKGYTNEAALEDLKFLKAVIKETLRLHPPFPLLLPRECRETCEVKGYTIPAGTKVIVNAWAI…
	Clan71	CYP71	Glyma.02G298600.1	MVMELQSQNNPFSIHLITFFLFLLFLLFKLVKKSSSNNTSKLPPGPKTLPLIGNLHQLVGSKSHHCFKKLADKYGPLMHLKLGEVSNIIVTSKELAQEIMRTQDLNFADRPNLVSTKIVSYNATSISFAPHGDYWRQLRKLCTVELLTSKRVQSFRSIREDEVSELVQKIRAGASEEGSVFNLSQHIYPMTYAIAARASFGKKSKYQEMFISLIKEQLSLIGGFSLADLYPSIGLLQIMAKAKVEKVHREVDRVLQDIIDQHKNRKSTDREAVEDLVDVLLKFRSENELQYPLTDDNLKAVIQDMFIGGGETSSSTVEWSMSEMVRNPWAMEKAQAEVRKVFDSKGYVNEAELHQLTYLKCIIREAMRLHPPVPLLIPRVNRERCKINGYEIPAKTRVF…
	Clan71	CYP71	Glyma.02G298800.1	MEMELHISLSTILPFFILVFMLIINIVWRSKTKNSNSKLPPGPRKLPLIGNIHHLGTLPHRSLARLANQYGPLMHMQLGELSCIMVSSPEMAKEVMKTHDIIFANRPYVLAADVITYGSKGMTFSPQGTYWRQMRKICTMELLAPKRVDSFRSIREQELSIFVKEMSLSEGSPINLSEKISSLAYGLISRIAFGKKSKDQEAYIEFMKGVTDTVSGFSLADLYPSIGLLQVLTGIRPRVEKIRRGMDRIIDNIVRDHRDKNSDTQPVVGEENGEDLVDVLLRLQKNGNLQHPLSDTVVKATIMDIFSAGSETTSTTMEWAMSELVKNPRMMEKAQIEVRRVFDPKGYVDETSIHELKYLRSVIKETLRLHTPVPLLLPRECSERCEINGYEIPAKSKVI…
	Clan71	CYP71	Glyma.04G110400.1	MASIQWPYEQLKTAFSVSTFHQYLFLFLLVIVVLKLTRRPKIKPSFNLPPSPRKLPIIGNLHQLSKLPYHSLRTLSQKHGSLMLLQLGQTRALVVSSPDAVREIMKTHDITFSNRPKTTAAKTLLYGCNDIGFASYGESWKHKRKICVLELLSPKRVQSLSLIREEEVAELINKIREASLSDASSSVNLSELLIETTNNIICKCALGKKYSTEDCHSRIKELAKRAMIQLGVVTVGDRFPFLGWVDFLTGQIQEFKATFGALDALFDQVIAEHKKMQRVSDLCSTEKDFVDILIMPDSELTKDGIKSILLDMFVAGSETTASALEWAMAELMKNPMKLKKAQDEVRKFVGNKSKVEENDINQMDYMKCVIKETLRLHPPAPLLAPRETASSVKLGGYDI…
	Clan71	CYP71	Glyma.05G042600.1	MALLKQWPYEVFSSTFYLSLSFFISVLLLFKLARRTKPETNLKLPPSPPKIPIIGNIHQFGTLPHRSLRDLSLKYGEMMMLQLGQMQTPTLVVSSVDVAMEIIKTYDLAFSDRPHNTAAKILLYGCADVGFASYGDKWRQKRKICVLELLSTKRVQSFRAIREEEVAELVNKLREASSSDASYVNLSEMLMSTSNNIVCKCALGRSFTRDGNNSVKNLAREAMIHLTAFTVRDYFPWLGWIDVLTGKIQKYKATAGAMDALFDTAIAEHLAEKRKGQHSKRKDFVDILLQLQEDSMLSFELTKTDIKALLTDMFVGGTDTTAAALEWAMSELVRNPIIMKKVQEEVRTVVGHKSKVEENDISQMQYLKCVVKETLRLHLPTPLLPPRVTMSNVKLKGFD…
	Clan71	CYP71	Glyma.05G042800.1	MISFTVFVFLTLLFTLSLVKQLRKPTAEKRRLLPPGPRKLPFIGNLHQLGTLPHQSLQYLSNKHGPLMFLQLGSIPTLVVSSAEMAREIFKNHDSVFSGRPSLYAANRLGYGSTVSFAPYGEYWREMRKIMILELLSPKRVQSFEAVRFEEVKLLLQTIALSHGPVNLSELTLSLTNNIVCRIALGKRNRSGADDANKVSEMLKETQAMLGGFFPVDFFPRLGWLNKFSGLENRLEKIFREMDNFYDQVIKEHIADNSSERSGAEHEDVVDVLLRVQKDPNQAIAITDDQIKGVLVDIFVAGTDTASATIIWIMSELIRNPKAMKRAQEEVRDLVTGKEMVEEIDLSKLLYIKSVVKEVLRLHPPAPLLVPREITENCTIKGFEIPAKTRVLVNAKSIA…
	Clan71	CYP71	Glyma.06G176100.1	MALLSSVLKQLPHELSSTHYLTVFFCIFLILLQLIRRNKYNLPPSPPKIPIIGNLHQLGTLPHRSFHALSHKYGPLMMLQLGQIPTLVVSSADVAREIIKTHDVVFSNRRQPTAAKIFGYGCKDVAFVYYGEEWRQKIKTCKVELMSLKKVRLFHSIRQEVVTELVEAIGEACGSERPCVNLTEMLMAASNDIVSRCVLGRKCDDACGGSGSSSFAALGRKIMRLLSAFSVGDFFPSLGWVDYLTGLIPEMKTTFLAVDAFLDEVIAEHESSNKKNDDFLGILLQLQECGRLDFQLDRDNLKAILVDMIIGGSDTTSTTLEWTFAEFLRNPNTMKKAQEEVRRVVGINSKAVLDENCVNQMNYLKCVVKETLRLHPPLPLLIARETSSSVKLRGYDIPA…
	Clan71	CYP71	Glyma.06G176200.1	MAFLSSVLKQLAYEPSSTHYLTAFFCFVSLLLMLKLTRRNKSNFPPSPPKLPIIGNLHQLGTLPHRSFQALSRKYGPLMMLQLGQTPTLVVSSADVAREIIKTHDVVFSNRPQPTAAKIFLYNCKDVGFAPYGEEWRQTKKTCVVELLSQRKVRSFRSIREEVVSELVEAVREACGGSERENRPCVNLSEMLIAASNNIVSRCVIGRKCDATVGDSVNCSFGELGRKIMRLFSAFCVGDFFPSLGWVDYLTGLIPEMKATFLAVDAFLDEVIAERESSNRKNDHSFMGILLQLQECGRLDFQLSRDNLKAILMDMIIGGSDTTSTTLEWAFAELLRKPNTMKKAQEEIRRVVGINSRVVLDENCVNQMNYLKCVVKETLRLHSPVPLLVARETSSSVKL…
	Clan71	CYP71	Glyma.07G159800.1	MEATHYRKCTPSCYICTTPKTKRLGQVYGPLMHLQLGEVFTVIVSSAEYAKEIMKTHDVIFATRPHILAADIFSYGSTNTIGAPYGNYWRQLRKICTVELLTQKRVNSFKPIREEELTNLIKMIDSHKGSPINLTEEVLVSIYNIISRAAFGMKCKDQEEFISAVKEGVTVAGGFNVADLFPSAKWLQPVTGLRPKIERLHRQIDRILLDIINEHKDAKAKAKEDQGEAEEDLVDVLLKFPDGHDSKQDICLTINNIKAIILDIFGAGGETAATAINWAMAEMIRDPRVLKKAQAEVRAVYNMKGMVDEIFIDELQYLKLVVKETLRLHPPVPLLVPRVCGESCGIGGYHIPVKSMVIVNAWAIGRDPNYWTQPERFYPERFIDSSIEYKGTNFEYIPF…
	Clan71	CYP71	Glyma.07G159800.6	MEATHYRKCTPSCYICTTPKTKRLGQVYGPLMHLQLGEVFTVIVSSAEYAKEIMKTHDVIFATRPHILAADIFSYGSTNTIGAPYGNYWRQLRKICTVELLTQKRVNSFKPIREEELTNLIKMIDSHKGSPINLTEEVLVSIYNIISRAAFGMKCKDQEEFISAVKEGVTVAGGFNVADLFPSAKWLQPVTGLRPKIERLHRQIDRILLDIINEHKDAKAKAKEDQGEAEEDLVDVLLKFPDGHDSKQDICLTINNIKAIILDIFGAGGETAATAINWAMAEMIRDPRVLKKAQAEVRAVYNMKGMVDEIFIDELQYLKLVVKETLRLHPPVPLLVPRVCGESCGIGGYHIPVKSMVIVNAWAIGRDPNYWTQPERFYPERFIDSSIEYKGTNFEYIPF…
	Clan71	CYP71	Glyma.07G159800.7	MEATHYRKCTPSCYICTTPKTKRLGQVYGPLMHLQLGEVFTVIVSSAEYAKEIMKTHDVIFATRPHILAADIFSYGSTNTIGAPYGNYWRQLRKICTVELLTQKRVNSFKPIREEELTNLIKMIDSHKGSPINLTEEVLVSIYNIISRAAFGMKCKDQEEFISAVKEGVTVAGGFNVADLFPSAKWLQPVTGLRPKIERLHRQIDRILLDIINEHKDAKAKAKEDQGEAEEDLVDVLLKFPDGHDSKQDICLTINNIKAIILDIFGAGGETAATAINWAMAEMIRDPRVLKKAQAEVRAVYNMKGMVDEIFIDELQYLKLVVKETLRLHPPVPLLVPRVCGESCGIGGYHIPVKSMVIVNAWAIGRDPNYWTQPERFYPERFIDSSIEYKGTNFEYIPF…
	Clan71	CYP71	Glyma.07G160700.1	MDSEVHNMLAVIMSFSLFIIVALKIGRNLKKTESSPNIPPGPWKLPIIGNIHHLVTCTPHRKLRDLAKTYGPLMHLQLGEVFTIIVSSPEYAKEIMKTHDVIFASRPKILASDILCYESTNIVFSPYGNYWRQLRKICTVELLTQRRVNSFKQIREEEFTNLVKMIDSHKGSPINLTEAVFLSIYSIISRAAFGTKCKDQEEFISVVKEAVTIGSGFNIGDLFPSAKWLQLVTGLRPKLERLHGKTDRILKEIINEHREAKSKAKEDQGEAEEDLVDVLLKFQDGDDRNQDISLTINNIKAIILDVFAAGGETSATTINWAMAEIIKDPRVMKKAQVEVREIFNMKGRVDEICINELKYLKSVVKETLRLHPPAPLLIPRECGQTCEINGYHIPVKSKV…
	Clan71	CYP71	Glyma.07G160700.4	MDSEVHNMLAVIMSFSLFIIVALKIGRNLKKTESSPNIPPGPWKLPIIGNIHHLVTCTPHRKLRDLAKTYGPLMHLQLGEVFTIIVSSPEYAKEIMKTHDVIFASRPKILASDILCYESTNIVFSPYGNYWRQLRKICTVELLTQRRVNSFKQIREEEFTNLVKMIDSHKGSPINLTEAVFLSIYSIISRAAFGTKCKDQEEFISVVKEAVTIGSGFNIGDLFPSAKWLQLVTGLRPKLERLHGKTDRILKEIINEHREAKSKAKEDQGEAEEDLVDVLLKFQDGDDRNQDISLTINNIKAIILDVFAAGGETSATTINWAMAEIIKDPRVMKKAQVEVREIFNMKGRVDEICINELKYLKSVVKETLRLHPPAPLLIPRECGQTCEINGYHIPVKSKV…
	Clan71	CYP71	Glyma.07G194300.1	MVPSFMPHENSHSFTMLFFTVFVLCLSLAFMIKWYSNAVTSKNSPPSPPRLPLLGNLHQLGLFPHRTLQTLAKKYGPLMLLHFGKVPVLVVSSADAAREVMRTHDLVFSDRPQRKINDILLYGSKDLASSKYGEYWRQIRSLSVSHLLSTKRVQSFRGVREEETARMMDNIRECCSDSLHVNLTDMCAAITNDVACRVALGKRYRGGGEREFQSLLLEFGELLGAVSIGDYVPWLDWLMSKVSGLFDRAQEVAKHLDQFIDEVIEDHVRNGRNGDVDVDSKQQNDFVDVLLSMEKNNTTGSPIDRTVIKALILDMFVAGTDTTHTALEWTMSELLKHPMVMHKLQDEVRSVVGNRTHVTEDDLGQMNYLKAVIKESLRLHPPLPLIVPRKCMEDIKVKG…
	Clan71	CYP71	Glyma.07G267100.1	MSFKLYSFIHTMELRPSFLVLTSFLLLLLWLARIYKQKIKVRSVVHKLPPGPWKLPLIGNLHQLAGAGTLPHHTLQNLSRKYGPLMHLQLGEISAVVVSSSDMAKEIMKTHDLNFVQRPELLCPKIMAYDSTDIAFAPYGDYWRQMRKICTLELLSAKRVQSFSFIREEEVAKLIQSIQLCACAGSPVNVSKSVFFLLSTLISRAAFGKKSEYEDKLLALLKKAVELTGGFDLADLFPSMKPIHLITRMKAKLEDMQKELDKILENIINQHQSNHGKGEAEENLVDVLLRVQKSGSLEIQVTINNIKAVIWDIFGAGTDTSATVLEWAMSELMKNPRVMKKAQAEIREAFRGKKTIRESDVYELSYLKSVIKETMRLHPPVPLLLPRECREPCKIGGYE…
	Clan71	CYP71	Glyma.08G109900.1	MYKPAELTIPFMHIQHYNISFHNMELLIPFSLLFTFACILLALFNTLNRSNSKILPPGPWKLPLLGNIHQFFGPLPHQTLTNLANQHGPLMHLQLGEKPHIIVSSADIAKEIMKTHDAIFANRPHLLASKSFAYDSSDIAFSSYGKAWRQLKKICISELLNAKHVQSLRHIREEEVSKLVSHVYANEGSIINLTKEIESVTIAIIARAANGKICKDQEAFMSTMEQMLVLLGGFSIADFYPSIKVLPLLTGMKSKLERAQRENDKILENMVKDHKENENKNGVTHEDFIDILLKTQKRDDLEIPLTHNNVKALIWDMFVGGTAAPAAVTVWAMSELIKNPKAMEKAQTEVRKVFNVKGYVDETELGQCQYLNSIIKETMRLHPPEALLLPRENSEACVV…
	Clan71	CYP71	Glyma.08G326900.1	MTKVLQSIRVAKTVSSVKLKAFCFHHESSNHLLHIHFSIFIFMFMAHKIMKKKSASTPNLPPGPWKLPIIGNILNIVGSLPHCRLRDLSAKYGPLMHLKLGEVSTIVVSSPEYAKEVLNTHDLIFSSRPPILASKIMSYDSKGMSFAPYGDYWRWLRKICTSELLSSKCVQSFQPIRGEELTNFIKRIASKEGSAINLTKEVLTTVSTIVSRTALGNKCRDHQKFISSVREGTEAAGGFDLGDLYPSAEWLQHISGLKPKLEKYHQQADRIMQSIINEHREAKSSATQGQGEEVADDLVDVLMKEEFGLSDNSIKAVILDMFGGGTQTSSTTITWAMAEMIKNPRVTKKIHAELRDVFGGKVGHPNESDMENLKYLKSVVKETLRLYPPGPLLLPRQCG…
	Clan71	CYP71	Glyma.08G326900.3	MSSCCYAPTKSERFSNCSIKTGPWKLPIIGNILNIVGSLPHCRLRDLSAKYGPLMHLKLGEVSTIVVSSPEYAKEVLNTHDLIFSSRPPILASKIMSYDSKGMSFAPYGDYWRWLRKICTSELLSSKCVQSFQPIRGEELTNFIKRIASKEGSAINLTKEVLTTVSTIVSRTALGNKCRDHQKFISSVREGTEAAGGFDLGDLYPSAEWLQHISGLKPKLEKYHQQADRIMQSIINEHREAKSSATQGQGEEVADDLVDVLMKEEFGLSDNSIKAVILDMFGGGTQTSSTTITWAMAEMIKNPRVTKKIHAELRDVFGGKVGHPNESDMENLKYLKSVVKETLRLYPPGPLLLPRQCGQDCEINGYHIPIKSKVIVNAWAIGRDPNHWSEAERFYPERF…
	Clan71	CYP71	Glyma.08G327100.1	MALLFFYFLVLISFAFTTIIVQKIRKKPKKTDDTTCKIPHGPRKLPIIGNIYNLLCSQPHRKLRDLAIKYGPVMHLQLGQVSTIVISSPECAREVMKTHDINFATRPKVLAIEIMSYNSTSIAFAGYGNYWRQLRKICTLELLSLKRVNSFQPIREDELFNLVKWIDSKKGSPINLTEAVLTSIYTIASRAAFGKNCKDQEKFISVVKKTSKLAAGFGIEDLFPSVTWLQHVTGLRAKLERLHQQADQIMENIINEHKEANSKAKDDQSEAEEDLVDVLIQYEDGSKKDFSLTRNKIKAIILDIFAAGGETTATTIDWAMAEMVKNPTVMKKAQSEVREVCNMKARVDENCINELQYLKLIVKETLRLHPPAPLLLPRECGQTCEIHGYHIPAKTKVIV…
	Clan71	CYP71	Glyma.08G327200.1	MALLFLFFVALISFLFTILIVQKLGKKSKKTDDTTCDMHMPHGPRKLPIIGNIYNLICSQPHRKLRDLAIKYGPVMHLQLGEVSTIVISSPDCAKEVMTTHDINFATRPQILATEIMSYNSTSIAFSPYGNYWRQLRKICILELLSLKRVNSYQPVREEELFNLVKWIASEKGSPINLTQAVLSSVYTISSRATFGKKCKDQEKFISVLTKSIKVSAGFNMGDLFPSSTWLQHLTGLRPKLERLHQQADQILENIINDHKEAKSKAKGDDSEAQDLVDVLIQYEDGSKQDFSLTKNNIKAIIQDIFAAGGETSATTIDWAMAEMIKDPRVMKKAQAEVREVFGMNGRVDENCINELQYLKLIVKETLRLHPPAPLLLPRECGQTCEIHGYHIPAKTKVI…
	Clan71	CYP71	Glyma.09G142200.1	MLTSLENSSSWFFLPLMVAFTLFVLCSVHNLLSKWNNSSNTAIPKKTTPPSPPKLPIIGNLHQLGTLTHRTLQSLAQTYGPLMLLHFGKMPVLVVSTAEAAREVMKTHDLVFSNRPHRKMFDILLYGSKDVASSPYGNYWRQIRSICVLHLLSAKKVQSFGAVREEEISIMMEKIRQCCSSLMPVNLSDLFSTLSNDIVCRVALGRRYSGEGGSNLREPMNEMMELLGSSVIGDFIPWLEWLGRVNGICGRAERVFKQLDEFFDEVVDEHVNKRDHDDDVDGEAQNDFVDILLSIQRTNAVGFEIDRTTIKALILDMFVAGTETTTSILGWVVTELLRHPIVMQKLQAEVRNVVGDRTPITEEDLSSMHYLKAVIKETFRLHPPVPLLLPRESMQDTKV…
	Clan71	CYP71	Glyma.09G142500.1	MLTSLENSSSWFFLPLMVAFTFFVLCSVHNLLSKWNNNSNTAIPNKTTPPSPPKLPIIGNLHQLGTLTHRTLQSLAQTYGPLMLLHFGKVPVLVVSTAEAAREVMKTHDLVFSNRPHRKMFDILLYGSKDVASSPYGNYWRQIRSICVLHLLSAKKVQSFDAVREEEISIMMEKIRQCCSCLMPVNLTDLFSTLSNDIVCRVALGRRCSGEGGSNLREPMSEMMELLGASVIGDFIPWLEWLGRVNGICGRAERAFKQLDAFFDEVVDEHVNKRDHDDDVDGEAQNDFVDILLSIQRTNAVGFEIDRTTIKALILDMFAAGTETTTSILGWVVTELLRHPIVMQKLQAEVRNVVGDRTPITEEDLSSMHYLKAVIKETFRLHPPAPLLLPRESMQDTKV…
	Clan71	CYP71	Glyma.09G142900.1	MSNFLNATSSFWFFLSMLSLFIFLAFPTIFNLLSKLNYSKSAKNSPPSPPKLPILGNLHQLGMSHHRTLQSLAQSYGPLMLLHFGKVPVLVVSTAEAAREVLKTQDHVFCNRPHRKMFDIFWYGSRDVASAPYGHYWRQVKSICVLHLLSAKKVLSFRRVREEEVVLLIGKVKKSFCSDFIMPVNLTDLFSDVTNDIVCRCVIGRRYEGSELRGPMSELEELLGASVLGDYIPWLDWLGRVNGVYGKAERAAKKLDEFLDEVVDEHVCKRDHDDGCGDDDVDGYGQNDFVDILLSIQKTSSTTDFQVDRTIMKALIMDMFGAGTDTTLAVLEWAMTELLRHPNVMQKLQDEVRSVAGGRTHITEEDLNVMRYLKAVIKEILRLHPPSPILIPRESMQDT…
	Clan71	CYP71	Glyma.09G260900.1	MHEVVNQHVILLLNITILKHMQKSMSNFLNGTTSLWFFLFMLALFTTIANLLLSKLNTKSNLAKKNSPPSPPKLPIIGNLYQFGTLTHRTLQSLAQTYGPLMLLHFGKVPVLVISNAEAAREVLKTQDHVFSNRPKLKMYEIFLYGFRGVASAPYGPYWRQVKSISVLHLLSPKKVQSFREVREEELVAMIEKVRLSCCSSASLMKVLNLTNLLTQVTNDIVCRCVIGRRCDESEVRGPISEMEELLGASVLGDYIPWLHWLGRVNGVYGRAERVAKKLDEFYDRVVEEHVSKRGRDDKHYVNDFVDILLSIQATDFQNDQTFVKSLIMDMLAAGTDTILAVIEWAMTELLRHPNAMQKLQDEVRSVVATGEEDRTHITEDDLNDMPYLKAVIKETLRL…
	Clan71	CYP71	Glyma.09G279100.1	MTNIVAIISFSLILIVVLMKIVRNHKKTKPTPNVPPGPWKLPVIGNVHQIITSAPHRKLRDLAKIYGPLMHLQLGEVTTIIVSSPECAKEIMKTHDVIFASRPRGVVTNILSYESTGVASAPFGNYWRVLRKMCTIELLSQKRVDSFQPIREEELTTLIKMFDSQKGSPINLTQVVLSSIYSIISRAAFGKKCKGQEEFISLVKEGLTILGDFFPSSRWLLLVTDLRPQLDRLHAQVDQILENIIIEHKEAKSKVREGQDEEKEDLVDILLKLQDGDDSNKDFFLTNDNIKATILEIFSAGGEPSAITIDWAMSEMARDPRVMKKAQDEVRMVFNMKGRVDETCINELKYLKSVVKETLRLHPPGPLLLPRESTQECKIHGYDIPIKSKVIVNAWAIGR…
	Clan71	CYP71	Glyma.10G114600.1	MEAQTYFLVIALFFLLHLLAKYYKLKTNVSHTLPPGPKKLPIIGNLHQLAAAGSLPHHALKKLSKKYGPLMHLQLGEISAVVASSPKMAKEIVKTHDVSFLQRPYFVAGEIMTYGGLGIAFAQYGDHWRQMRKICVTEVLSVKRVQSFASIREDEAAKFINSIRESAGSTINLTSRIFSLICASISRVAFGGIYKEQDEFVVSLIRRIVEIGGGFDLADLFPSIPFLYFITGKMAKLKKLHKQVDKLLETIVKEHQEKHKRAKEDGAEIEDEDYIDVLLRIQQQSDTLNINMTTNNIKALILDIFAAGTDTSASTLEWAMTEVMRNPRVREKAQAELRQAFRGKEIIHESDLEQLTYLKLVIKETFRVHPPTPLLLPRECSQLTIIDGYEIPAKTKVMV…
	Clan71	CYP71	Glyma.10G115300.1	MEAQSYLLLIGLFFVLHWLAKCYKSSVSQKLPPGPKKLPIIGNLHQLAEAGSLPHHALRDLAKKYGPLMHLQLGEISAVVASSPKMAKEIVKTHDVSFLQRPHLVFGQMISYGGLGIAFAPYGDHWRQMRKMCATELLSTKRVQSFASIREDEAAKFIDSIRESAGSPINLTSRIFSLICASISRVAFGGIYKEQDEFVVSLIRKIVESGGGFDLADVFPSIPFLYFLTGKMTRLKKLHKQVDKVLENIIREHQEKNKIAKEDGAELEDQDFIDLLLRIQQDDTLDIQMTTNNIKALILDIFAAGTDTSASTLEWAMAEMMRNPRVREKAQAELRQAFREKEIIHESDLEQLTYLKLVIKETFRVHPPTPLLLPRECSQPTIIDGYEIPAKTKVMVNAY…
	Clan71	CYP71	Glyma.10G115400.1	MEAQSYLLLIGLFFVLHWLAKCYKSSVSQKLPPGPKKLPIIGNLHQLAEAGSLPHHALRDLAKKYGPLMHLQLGEISAVVASSPKMAKEIVKTHDVSFLQRPHLVFGQMISYGGLGIAFAPYGDHWRQMRKMCATELLSTKRVQSFASIREDEAAKFIDSIRESAGSPINLTSRIFSLICASISRVAFGGIYKEQDEFVVSLIRKIVESGGGFDLADVFPSIPFLYFLTGKMTRLKKLHKQVNKVLENIIREHQEKNKIAKEDGAELEDQDFIDLLLRIQQDDTLDIQMTTNNIKALILDIFAAGTDTSASTLEWAMAEMMRNPRVREKAQAELRQAFREKEIIHESDLEQLTYLKLVIKETFRVHPPTPLLLPRECSQPTIIDGYEIPAKTKVMVNAY…
	Clan71	CYP71	Glyma.10G115500.1	MEAQSYLLLIGLFFVLHWLAKCYKSSVSQKLPPGPKKLPIIGNLHQLAEAGSLPHHALRDLAKKYGPLMHLQLGEISAVVASSPKMAKEIVKTHDVSFLQRPHLVFGQMISYGGLGIAFAPYGDHWRQMRKMCATELLSTKRVQSFASIREDEAAKFIDSIRESAGSPINLTSRIFSLICASISRVAFGGIYKEQDEFVVSLIRKIVESGGGFDLADVFPSIPFLYFLTGKMTRLKKLHKQVDKVLENIIREHQEKNQIAKEDGAELEDQDFIDLLLRIQQDDTLDIQMTTNNIKALILDIFAAGTDTSASTLEWAMAEMMRNPRVREKAQAELRQAFREKEIIHESDLEQLTYLKLVIKETFRVHPPTPLLLPRECSQPTIIDGYEIPAKTKVMVNAY…
	Clan71	CYP71	Glyma.11G062500.1	MEHSQLSIVITFFVFLLLLRLVKNHKPKSSHKLPPGPWKLPIIGNLHQVALAASLPHHALQKLARKYGPLMHLQLGEISTLVVSSPKMAMEIMKTHDLAFVQRPQLLAPQYMAYGATDIAFAPYGEYWRQMRKICTLELLSAKRVQSFSHIRQDENRKLIQSIQSSAGSPIDLSSKLFSLLGTTVSRAAFGNKNDDQDEFMSLVRKAVAMTGGFELDDMFPSLKPLHLLTGQKAKVEEIHKRADRILEDILRKHVEKRTRAKEEGNNSEAQQEDLVDVLLRIQQSGSLEVQMTTGHVKAVIWDIFAAGTDTSASTLEWAMAEMMKNPRVREKAQAVIRQAFKGKETIRETDLEELSYLKSVIKETLRLHPPSQLIPRECIKSTNIDGYEIPIKSKVMIN…
	Clan71	CYP71	Glyma.11G062600.1	MEYSPLSIVITFFVFLLLHWLVKTYKQKSSHKLPPGPWRLPIIGNLHQLALAASLPDQALQKLVRKYGPLMHLQLGEISTLVVSSPKMAMEMMKTHDVHFVQRPQLLAPQFMVYGATDIAFAPYGDYWRQIRKICTLELLSAKRVQSFSHIRQDENKKLIQSIHSSAGSPIDLSGKLFSLLGTTVSRAAFGKENDDQDEFMSLVRKAITMTGGFEVDDMFPSLKPLHLLTRQKAKVEHVHQRADKILEDILRKHMEKRTRVKEGNGSEAEQEDLVDVLLRLKESGSLEVPMTMENIKAVIWNIFAAGTDTSASTLEWAMSEMMKNPKVKEKAQAELRQIFKGKEIIRETDLEELSYLKSVIKETLRLHPPSQLIPRECIKSTNIDGYEIPIKTKVMINT…
	Clan71	CYP71	Glyma.13G181900.1	MPQGNLHSFTMLFFTLFLLFLSLIFIIKWYSNAVTTKNSPPSPPRLPLLGNLHQLGLFPHRTLQTLAQNYGPLMLLHFGKVPVLVVSSADAACEVMKTHDLIFSDRPQRKMNDILMYGSKDLASSTYGEYWRQMRSLTVSQLLNTKRVQSFRGSREEEIARMMEDIKRCCSDSLHVNLTDMFAALTNDVACRVVFGRRYGGGEGTQFQSLLLEFGELLGAVSIGDYVPWLDWVMNKVSGLYERAQRVAKHLDQFIDEVIEEHVRNGRDGHADVDSEEQNDFVDVMLSIEKSNTTGSLIDRSAMKALILDFFLAATDTTTALEWTMSELLKHPNVMHKLQEEVRSVVGNRTHVTEDDLGQMNFLRAVIKESLRLHPPLPLIVPRKCMEDIKVKEYDIAAG…
	Clan71	CYP71	Glyma.14G015100.1	MGLELHISLSIILPFFLLVFILIITLWRSKTKNSNSKLPPGPRKLPLIGSIHHLGTLPHRSLARLASQYGSLMHMQLGELYCIVVSSPEMAKEVMNTHDIIFANRPYVLAADVITYGSKGMTFSPQGTYLRQMRKICTMELLAQKRVQSFRSIREQELSIFVKEISLSEGSPINISEKINSLAYGLLSRIAFGKKSKDQQAYIEHMKDVIETVTGFSLADLYPSIGLLQVLTGIRTRVEKIHRGMDRILENIVRDHREKTLDTKAVGEDKGEDLVDVLLRLQKNGDLQHPLSDTVVKATILDIFSAGSDTSSTIMVWVMSELVKNPRVMEKVQIEVRRVFDGKGYVDETSIHELKYLRSVIKETLRLHPPSPFLLPRECSERCEINGYEIPTKSKVIVN…
	Clan71	CYP71	Glyma.14G117200.1	MDSQILNSLALILPLFLFMILILKLGRKLKRTELSLNIPRGPWKLPIIGNLHQLVTSTPHRKLRDLAKIYGPMMHLQLGEIFTIVVSSAEYAEEILKTHDVNFASRPKFLVSEITTYEHTSIAFAPYGEYWRQVRKICAMELLSPKRVNSFRSIREEEFTNLVKMVGSHEGSPINLTEAVHSSVCNIISRAAFGMKCKDKEEFISIIKEGVKVAAGFNIGDLFPSAKWLQHVTGLRSKLEKLFGQIDRILGDIINEHKEAKSKAKEGNGKAEEDLLAVLLKYEEGNASNQGFSLTINNIKAVTSDIFAGGIDAVATAINWAMAEMIRDPRVMKKAQIEVREIFNMKGRVDESCMDELKYLKSVVKETLRLHPPAPLILPRECAQACEINGFHIPVKTKV…
	Clan71	CYP71	Glyma.15G050300.1	MVMELHNHTPFSIYFITSILFIFFVFFKLVQRSDSKTSSTCKLPPGPRTLPLIGNIHQIVGSLPVHYYLKNLADKYGPLMHLKLGEVSNIIVTSPEMAQEIMKTHDLNFSDRPDFVLSRIVSYNGSGIVFSQHGDYWRQLRKICTVELLTAKRVQSFRSIREEEVAELVKKIAATASEEGGSIFNLTQSIYSMTFGIAARAAFGKKSRYQQVFISNMHKQLMLLGGFSVADLYPSSRVFQMMGATGKLEKVHRVTDRVLQDIIDEHKNRNRSSEEREAVEDLVDVLLKFQKESEFRLTDDNIKAVIQDIFIGGGETSSSVVEWGMSELIRNPRVMEEAQAEVRRVYDSKGYVDETELHQLIYLKSIIKETMRLHPPVPLLVPRVSRERCQINGYEIPSK…
	Clan71	CYP71	Glyma.16G195500.1	MSTSEMVAFIPLMVAFSLFVLCSSVHNHLSSKWNNNSNTAIANKTTQLSLPKLPIIGNLHQLGTLTHRTLQSLAQNNGPLMLLHFGKVPVLVVSTAEAAREVMKTHDLVFSNRPHRKMFDILLYGSQDVVSSSYGHFWREIRSICVFHLLSAKKVQSFGAVREEEISIMMENIRQCCSSLMPVNLTDLFFKLTNDIVCRAALGRRYSGEGGSKLREPLNVMVELLGVSVIGDFIPWLERLGRVNGIYGKAERAFKQLDEFFDEVVDEHLSKRDNDGVNDEGHNDFVDILLRIQRTNAVGLQNDRTIIKALILDMFGAGTDTTASILGWMMTELLKHPIVMQKLQAEVRNVVGDRTHITKDDLSSMHYLKAVIKETFRLHPPLPLLIPRESIQDTKVMGY…
	Clan71	CYP71	Glyma.16G195600.1	MWISQQENSSSWFFLPVVTFIILFLLRTFLNLLSNRNNDSKKPSPPSPPKLPIIGNLHQLGTHIHRSLQSLAQTYGSLMLLHLGKVPVLVVSTAEAAREVLKTHDPVFSNKPHRKMFDILLYGSKDVASAPYGNYWRQTRSILVLHLLSAKKVQSFEAVREEEISIMMENIRKCCASLMPVDLTGLFCIVANDIVCRAALGRRYSGEGGSKLRGPINEMAELMGTPVLGDYLPWLDWLGRVNGMYGRAERAAKKVDEFFDEVVDEHVNKGGHDGHGDGVNDEDQNDLVDILLRIQKTNAMGFEIDRTTIKALILDMFGAGTETTSTILEWIMTELLRHPIVMQKLQGEVRNVVRDRTHISEEDLSNMHYLKAVIKETFRLHPPITILAPRESTQNTKVM…
	Clan71	CYP71	Glyma.17G007200.1	MAVLSSLAVITFFLSLLVLFLAKNYKQKSLHKLPPGPWKLPIIGNLLQLAAASSLPHHAIRELAKKYGPLMHLQLGEISAVIVSSPNMAKEIMKTHDLAFAQRPKFLASDIMGYGSVDIAFAPYGDYWRQMRKICTLELLSAKKVQSFSNIREQEIAKLIEKIQSSAGAPINLTSMINSFISTFVSRTTFGNITDDHEEFLLITREAIEVADGFDLADMFPSFKPMHLITGLKAKMDKMHKKVDKILDKIIKENQANKGMGEEKNENLVEVLLRVQHSGNLDTPITTNNIKAVIWDIFAAGTDTSAKVIDWAMSEMMRNPRVREKAQAEMRGKETIHESNLGELSYLKAVIKETMRLHPPLPLLLPRECIEACRIDGYDLPTKTKVIVNAWAIGRDPEN…
	Clan71	CYP71	Glyma.17G125300.1	MALKQWLYEQMKEMAFSTFYLSLFFFISVLYLFNLTRKTKSKTNLNLPPSPPKLPLIGNLHQLGSLPHRSLRDLSLKHGDIMLLQLGQMQNPTVVVSSADVAMEIMKTHDMAFSNRPQNTAAKVLLYGGIDIVFGLYGERWSQKRKICARELLSTKRVQSFHQIRKEEVAILVNKLREVSSSEECYVNLSDMLMATANDVVCRCVLGRKYPGVKELARDVMVQLTAFTVRDYFPLMGWIDVLTGKIQEHKATFRALDAVFDQAIAEHMKEKMEGEKSKKKDFVDILLQLQENNMLSYELTKNDLKSLLLDMFVGGTDTSRATLEWTLSELVRNPTIMKKVQEEVRKVVGHKSNVEENDIDQMYYLKCVVKETLRLHSPAPLMAPHETISSVKLKGYDIP…
	Clan71	CYP71	Glyma.17G125400.1	MALLKQWPYEVFSSTFYISLSFFISVLLLFKLTKRTKPKTNLNLPPSLPKLPIIGNIHQFGTLPHRSLRDLSLKYGDMMMLQLGQMQTPTLVVSSVDVAMEIIKTHDLAFSDRPHNTAAKILLYGCTDVGFASYGEKWRQKRKICVLELLSMKRVQSFRVIREEEAAKLVNKLREASSSDASYVNLSEMLMSTSNNIVCKCAIGRNFTRDGYNSGKVLAREVMIHLTAFTVRDYFPWLGWMDVLTGKIQKYKATAGAMDALFDQAIAEHLAQKREGEHSKRKDFLDILLQLQEDSMLSFELTKTDIKALVTDMFVGGTDTTAAVLEWAMSELLRNPNIMKKVQEEVRTVVGHKSKVEENDISQMHYLKCVVKEILRLHIPTPLLAPRVTMSDVKLKGYD…
	Clan71	CYP71	Glyma.17G209100.1	MDSQILNSLALILPFFLFMIVVLKLGRKLKKTEPSLNIPPGPWKLPIVGNLHQLVTSSPHKKFRDLAKIYGPMMHLQLGEIFTIVVSSAEYAKEILKTHDVIFASRPHFLVSEIMSYESTNIAFSPYGNYWRQVRKICTLELLSQKRVNSFQPIREEELTNLVKMIGSQEGSSINLTEAVHSSMYHIITRAAFGIRCKDQDEFISAIKQAVLVAAGFNIGDLFPSAKWLQLVTGLRPTLEALFQRTDQILEDIINEHREAKSKAKEGHGEAEEEGLLDVLLKFEDGNDSNQSICLTINNIKAVIADIFGGGVEPIATTINWAMAEMIRNPRVMKTAQVEVREVFNIKGRVDETCINELKYLKSVVKETLRLHPPAPLILPRECQETCKINGYDIPVKTK…
	Clan71	CYP71	Glyma.18G080200.1	MDLQTLYFTSILSIFIFMFLGHKIITKKPASTPNLPPGPWKIPIIGNIHNVVGSLPHHRLRDLSAKYGPLMHLKLGEVSTIVVSSPEYAKEVLSTHDLIFSSRPPILASKIMSYDSMGMSFAPYGDYWRRLRKICASELLSSKRVQSFQPIRGEELTNFIKRIASKEGSPINLTKEVLLTVSTIVSRTALGNKCRDHKKFISAVREATEAAGGFDLGDLYPSAEWLQHISGLKPKLEKYHQQADRIMQNIVNEHREAKSSATHGQGEEVADDLVDVLMKEEFGLSDNSIKAVILDMFGGGTQTSSTTITWAMAEMIKNPRVMKKVHAEVREVFGGKVGHPDESDMENLKYLKSVVKETLRLHPPGPLLLPRQCGQACEINGYYIPIKSKVIINAWAIGR…
	Clan71	CYP71	Glyma.18G080200.2	MDLQTLYFTSILSIFIFMFLGHKIITKKPASTPNLPPGPWKIPIIGNIHNVVGSLPHHRLRDLSAKYGPLMHLKLGEVSTIVVSSPEYAKEVLSTHDLIFSSRPPILASKIMSYDSMGMSFAPYGDYWRRLRKICASELLSSKRVQSFQPIRGEELTNFIKRIASKEGSPINLTKEVLLTVSTIVSRTALGNKCRDHKKFISAVREATEAAGGFDLGDLYPSAEWLQHISGLKPKLEKYHQQADRIMQNIVNEHREAKSSATHGQGEEVADDLVDVLMKEEFGLSDNSIKAVILDMFGGGTQTSSTTITWAMAEMIKNPRVMKKVHAETLRLHPPGPLLLPRQCGQACEINGYYIPIKSKVIINAWAIGRDPNHWSEAERFYPERFIGSSVDYQGNSFE…
	Clan71	CYP71	Glyma.18G080300.1	MDLGHQNIPSLAILPFFLFMFTVFSLFWRTKTKPSNSKLPPGPPKLPLIGNLHQLGAMPHHGLTKLSHQYGPLMHIKLGALSTIVVSSPEMAKEVLKTHDIIFANRPYLLAADVISYGSKGMSFSPYGSYWRQMRKICTFELLTPKRVESFQAIREEEASNLVREIGLGEGSSINLTRMINSFSYGLTSRVAFGGKSKDQEAFIDVMKDVLKVIAGFSLADLYPIKGLQVLTGLRSKVEKLHQEVDRILEKIVRDHRDTSSETKETLEKTGEDLVDVLLKLQRQNNLEHPLSDNVIKATILDIFSAGSGTSAKTSEWAMSELVKNPRVMEKAQAEVRRVFGEKGHVDEANLHELSYLKSVIKETLRLHIPVPFLLPRECSERCEINGYEIPAKSKVIIN…
	Clan71	CYP71	Glyma.18G080400.1	MDLQLLYFTSIFSIFIFMFMTHKIVTKKSNSTPSLPPGPWKLPIIGNMHNLVGSPLPHHRLRDLSAKYGSLMHLKLGEVSTIVVSSPEYAKEVMKTHDHIFASRPYVLAAEIMDYDFKGVAFTPYGDYWRQLRKIFALELLSSKRVQSFQPIREEVLTSFIKRMTTIEGSQVNITKEVISTVFTITARTALGSKSRHHQKLISVVTEAAKISGGFDLGDLYPSVKFLQHMSGLKPKLEKLHQQADQIMQNIINEHREAKSSATGDQGEEEVLLDVLLKKEFGLSDESIKAVIWDIFGGGSDTSSATITWAMAEMIKNPRTMEKVQTEVRRVFDKEGRPNGSGTENLKYLKSVVSETLRLHPPAPLLLPRECGQACEINGYHIPAKSRVIVNAWAIGRDP…
	Clan71	CYP71	Glyma.20G007000.1	MDSELLSILPPIMSFFLFMIVALKIGSNLKKTESSPNIPPGPWKLPIIGNIHHLVTSAPHRKLRDLAKMYGPLMHLQLGEVFTIIVSSPEYAKEIMKTHDVIFASRPKILASDILCYESTNIVFSPYGNYWRQLRKICTLELFTQKRVNSFQPTREKELTNLVKMVDSHKGSPMNFTEAVLLSIYNIISRAAFGMECKDQEEFISVVKEAVTIGSGFNIGDLFPSAKWLQLVTGLRPKLERLHRQIDRILEGIINEHKQANSKGYSEAKEDLVDVLLKFQDGNDSNQDICLSINNIKAIILDIFSAGGDTAASTINWAMAEMIRDSRVMEKVQIEVREVFNMKGRVDEICIDELKYLKSVVKETLRLHPPAPLLLPRECGQACEINGYHIPVKSKVIVN…
	Clan71	CYP71	Glyma.20G007100.1	MATKLVIFIRTFRTPYWSLVTMDSEVLNLLALILPFLLFVIVALKIGRRNLKKSESTPKIPPGPWKLPIIGNILHLVTSTPHRKLRDLAKIYGPLMHLQLGELFIIVVSSAEYAKEIMKTHDVIFAQRPHSLASDILSYESTNIISAPYGHYWRQLRKICTVELFTQKRVNSFKPIREEELGNLVKMIDSHGGSSSINLTEAVLLSIYNIISRAAFGMKCKDQEEFISVVKEAITIGAGFHIGDLFPSAKWLQLVSGLRPKLDIIHEKIDRILGDIINEHKAAKSKAREGQDEAEEDLVDVLLKFKDGNDRNQDICLTTNNIKAIILDIFGAGGETSATTINWAMAEMIKNPRAMNKAQLEVREVFDMKGMVDEICIDQLKYLKSVVKETLRLHPPAPL…
	Clan71	CYP712	Glyma.12G239100.1	MIEMIVFLFLVLLISLILSSSSNNSLQLPPSPPSIPLLGHLHHLTPSLYKSLYTLSSKHGPLLLLRLGPSRRLLLLVSSAAVATDVFKTHDLAFSSRPAFAFAERLPFGTSGFVTAPYGPYWRFMKKLCVTELLSTRQLERSRSIRREEILRSIKRVIDNARETVALDLGSEFTKFTNNVTCRTAMSTSCAEKCEDAERIRKLVKESFELAAKLCFGDVLGPFKELSFWVYGKKAIDMSTRYDELLEEVLKEHEHKRLSRANGDQSERDLMDILLDVYHDAHAEFKITMAHIKAFFMDLFIAGTHTSAEATQWAMAELLNHPEAFQKVRKEIELVTGNVRLVDESDITNLPYLQAVVKETLRLYPPAPITTRECRQHCKINSFDVPPKTAVAINLYAIM…
	Clan71	CYP712	Glyma.19G144600.1	MDAAGATLLCYIFFIALLIFPILFKSLVTRSTKKFRPPPSPPTLPIIGHLHLVGSVIPKSFQALARLYGPLIQLRLGASTCVVVSNDQVAKEVMKTNDLNFCYRPHFGSSEYFLYKGSDFITAPYGPYWRFIKKLCMTQLLSSSQLGRFVHVREQEINKLLKSVLVCSSEGRVIDLSFELTSLTNNILCRMAMSTSCLDRVHDAAEILDLVREFLHAGAKLSMGEVLGPLGKFDLFGYGKKLVKIVGKFDQVLERIMEEHEEKNTEVRRGETGDMMDIMLQVYKDPNAEVRLTRNHIKAFFLDIFLAGTETSSAALQWAMAEMMNKEGVLKRVKEEIDEVVGTNRLVSESDITNLRYLQAVVKEVLRLHPTAPLAIRESAENCSINGYDIKGQTRTLIN…
	Clan71	CYP73	Glyma.02G236500.1	MDLLLLEKTLIGLFLAAVVAIAVSTLRGRKFKLPPGPLPVPIFGNWLQVGDDLNHRNLTDLAKKFGDIFLLRMGQRNLVVVSSPELAKEVLHTQGVEFGSRTRNVVFDIFTGKGQDMVFTVYGEHWRKMRRIMTVPFFTNKVVQQYRHGWESEAAAVVEDVKKNPDAAVSGTVIRRRLQLMMYNNMYRIMFDRRFESEEDPIFQRLRALNGERSRLAQSFEYNYGDFIPILRPFLKGYLKICKEVKETRLKLFKDYFVDERKKLGSTKSTNNNNELKCAIDHILDAQRKGEINEDNVLYIVENINVAAIETTLWSIEWGIAELVNHPEIQQKLRDEIDRVLGAGHQVTEPDIQKLPYLQAVVKETLRLRMAIPLLVPHMNLHDAKLGGYDIPAESKILV…
	Clan71	CYP73	Glyma.14G205200.1	MDLLLLEKTLIGLFLAAVVAIAVSTLRGRKFKLPPGPLPVPIFGNWLQVGDDLNHRNLTDLAKKFGDIFLLRMGQRNLVVVSSPELAKEVLHTQGVEFGSRTRNVVFDIFTGKGQDMVFTVYGEHWRKMRRIMTVPFFTNKVVQQYRHGWESEAAAVVEDVKNNPDAAVSGTVIRRRLQLMMYNNMYRIMFDRRFESEEDPIFQRLRALNGERSRLAQSFEYNYGDFIPILRPFLKGYLKICKEVKETRLKLFKDYFVDERKKLGSIKSSNNNELKCAIDHILDAQRKGEINEDNVLYIVENINVAAIETTLWSIEWGIAELVNHPEIQQKVRDEIDRVLEAGHQVTEPDIQKLPYLQAVVKETLRLRMAIPLLVPHMNLHDAKLGGYDIPAESKILVN…
	Clan71	CYP73	Glyma.20G114200.1	MGLQIKEPLLFTLVTISLISITKLLHSYFSIPFSPSNLSIAIATLIFVLISYKFSSSSIKHSSTTLPPGPLSVPIFGNWLQVGNDLNHRLLASMSQTYGPVFLLKLGSKNLVVVSDPELATQVLHAQGVEFGSRPRNVVFDIFTGNGQDMVFTVYGDHWRKMRRIMTLPFFTNKVVHNYSNMWEEEMDLVVRDLNVNERVRSEGIVIRRRLQLMLYNIMYRMMFDAKFESQEDPLFIQATRFNSERSRLAQSFEYNYGDFIPLLRPFLRGYLNKCKDLQSRRLAFFNTHYVEKRRQIMAANGEKHKISCAMDHIIDAQMKGEISEENVIYIVENINVAAIETTLWSIEWAVAELVNHPTVQSKIRDEISKVLKGEPVTESNLHELPYLQATVKETLRLH…
	Clan71	CYP736	Glyma.05G182800.2	MIWIAIFLVSLAYMWLRRISKNKAKKLPPGPRGLPILGSLHKLGPNPHRDLHQLAQKYGPVMHLRLGFVPTIVVSSPQAAELFLKTHDLVFASRPPLEAAKYISWEQRNLSFAEYGSYWRNVRKMCTLELLSHTKINSFRSMREEELDLMVKLLREAAKDGAVVDLSAKVSTLSADMSCRMVLGKKYMDRDLDEKGFKAVMQEGMHLAATPNMGDYIPYIAALDLQGLTKRMKVVGKIFDDFFEKIIDEHLQSEKGEDRTKDFVDVMLDFVGTEESEYRIERPNIKAILLDMLAGSMDTSATAIEWTLSELLKNPRVMKKVQMELETVVGMKRKVEESDLDKLVYLDMVVKESMRLHPVAPLLIPHQSTEDCMVGDLFIPKKSRVIVNAWAIMRDPSAW…
	Clan71	CYP736	Glyma.05G233200.1	MYPSTPPLLLLLLLLSTFIIFILSIIFLRRNQSKDGPPGPPALPVIGNLHMLGKLPHRTLEALAHRYGPIMSLRLGQVPHVVVSSSEAAEDFLKAHDAVFASRPRLEASKYFGYGSKGLAFSEYGPYWRYMRKVCTLRLLTASKVDSFAPLRKRELELAVKSLQESAAAKEGEVVVDLSEVVHNVVEEIVYKMVLGSSKHDEFDLKGLIQNAMNLTGAFNLSDYVPWLRAFDLQGLNRSYKRISKALDEVMEKIIKEHEHGSDVQNEQHHRHRDFIDILLSLMHQPIDPYDEQNHIIDKTNIKAILLDMIAGAFETSATVVEWTFSELLRHPRVMKNLQDELDNVVGRDKMVEENDLAKLSYLDIVIKETLRLYPPGPLVPRESTEDAMVQGYFLKKKS…
	Clan71	CYP736	Glyma.07G089700.1	MLIETLAIPAALLVIFILILSSALFHLQDDRTQLPPGPYPLPIIGNLHMLGKLPNRTLQALAKKYGPIMSIKLGQIPTIVVSSPETAELFLKTHDTVFASRPKTQASKYMSYGTRGIVFTEYGPYWRNVRKVCTTELLSASKVEMLAPLRRQELGILVKSLEKAAASHDVVNVSDKVGELISNIVCKMILGRSRDDRFDLKGLTHDYLHLLGLFNVADYVPWAGVFDLQGLKRQFKQTSKAFDQVFEEIIKDHEHPSDNNKENVHSKDFVDILLSLMHQPSEHHVIDRINIKAILLDMIAGAYDTSAIGVEWAMSELLRHPRVMKKLQDELNIVVGTDRPVEESDLAKLPYLNMVVKETLRLYPVGPLLVPRESLEDITINGYYIKKKSRILINAWAIG…
	Clan71	CYP736	Glyma.07G089800.1	MLPQTLAIPALLFVVFIFILSAVVLQSKQNEKYPPGPKTLPIIGNLHMLGKLPHRTLQSLAKQYGPIMSLKLGQVTTIVISSPETAELFLKTHDTTFASRPKSISSKYISYGGKGLVFSEYGPYWRNMRKLCTVQLLIASKVEMFSPLRSQQLQELVKCLRKTASSREVVDLSDMVGDLIENINFQMIFGCSKDDRFDVKNLAHEIVNLAGTFNVADYMPWLRVFDLQGLVRRLKKVSKSFDEVLEQIIKDHEQSSDNKQKSQRLKDFVDIFLALMHQPLDPQDEHGHVLDRTNMKAIMMTMIVAAIDTSATAIEWAMSELLKHPRVMKKLQDELESVVGMNRKVEESDMEKLPYLDLVVKETLRLYPVAPLLVPRECREEITIDGYCIKERSRIIVNA…
	Clan71	CYP736	Glyma.07G089900.1	MSPLTLVILMVPLVTLIYILCTTTVSRQKQPPLPPGPPRLPIIGNLHMVGGAGTLPHRSLQSLSKRYGPIMSLQLGNVPTVVVSSPEAAELFLKTHDTVFANRPKFETAQYTYGEESVAFAEYGPYWRNVRKVCTTHLLSASKVESFDGLRKREIGAMVESLKEAAMAREVVDVSERVGEVLRDMACKMVLGRNKDDRFDLKGILVETMSVSGAFNLADYVPWLRLFDLQGLTRRSKKISKSLDKMLDEMIEEHQLAPPAQGHLKDFIDILLSLKDQPIHPHDKHAPIIDKRSIKGIVFDMIIGASETSSNVIEWAISELVRHPRVMENLQNELKDVVGINKMVDENDLAKLSYLDMVVKETLRLHPVVPLLAPHESMEDIVIEGYYIKKKSRVIINAW…
	Clan71	CYP736	Glyma.08G140400.2	MIWIALFLVSLAFLRLWRSNKNAKKLPPGPKGLPILGSLHKLGPNPHRDLHKLAQKYGPVMHLRLGFVPTIVVSSPKSAELFLKTHDLVFASRPRFVADQYISWGQRNLGFAEYGSYWRNMRKMCTLELLSQSKINSFRRMREEELDLLIKLVREAANDGAAVDLSVKVATLIADMSCRMILGKKYMDQDMCGRGFKAVIQEAMRLLATPNVGDYIPYIGAIDLQGLTKRFKVLYEIFDDFFEKVIDEHMESEKGEDKTKDFVDVMLGFLGTEESEYRIERSNIKAILLDMLAGSMDTSATAIEWTLSELLKNPRVMKKLQMELETVVGMKRKVGESDLDKLKYLEMVVKESMRLHPVVPLLIPHQSTEDCIVGDFFIPKKSRVIINAWAIMRDPSAWV…
	Clan71	CYP736	Glyma.08G140500.1	MIWIVAIFVVSLTYLCLWRRSKKKGKRLPPGPKGLPILGNLHKLGSNPHRDLHELAQKYGPVMYLRLGFVPAIIVSSPQAAELFLKTHDLVFAGRPPHEAAKYMAWEQKNLAFGEYGSYWRNVRKMCTLELLSQTKINSFRPMREEELDLLIKNLRGASNDGAVVDLSAKVATLSADMSCRMILGKKYMDQDLDQKGFKAVMQEVLHLAAAPNIGDYIPYIGKLDLQGLIRRMKTLRRIFDEFFDKIIDEHIQSDKGEVNKGKDFVDAMLDFVGTEESEYRIERPNIKAILLDMLVGSIDTSATAIEWTISELLKNPRVMKKLQRELETVVGMKRKVGESDLDKLKYLEMVVKEGLRLHPVAPLLLPHHSREDCMVGEYFIPKNSRVIVNAWTIMRDPS…
	Clan71	CYP736	Glyma.08G140600.1	MIWIAAFLVSLAFLWLWISNKNAKKLPPGPIGLPILGSLHKLGANPHRGLHQLAQKYGPIMHLRLGFVPTIVISSPQAAELFLKTHDLVFASRPPHEAIKYIAWEQRNLGFAEYGSYWRNMRKMCTLELLSQTKINSFRIVREEELDLSIKLLREASNDGAAAVDISAKVARISADVACRMVLGKKYMDQDLDEKGFKAVVQEVMHLLATPNIGDYIPYIGKLDLQGLIKRMKAVRKIFDEFFDKIIDEHIQSDKGQDNKVKDFVDVMLGFVGSEEYEYRIERPNIKAILLDMLLGSMDTSATVIEWTLSELLKNPRVMKKVQMELETVVGMQRKVKESDLDKLEYLDMVIKENMRLHPVAPLLIPHQSREDCMVGDFFIPRKSRVVINAWAIMRDSSV…
	Clan71	CYP736	Glyma.08G140600.2	MIWIAAFLVSLAFLWLWISNKNAKKLPPGPIGLPILGSLHKLGANPHRGLHQLAQKYGPIMHLRLGFVPTIVISSPQAAELFLKTHDLVFASRPPHEAIKYIAWEQRNLGFAEYGSYWRNMRKMCTLELLSQTKINSFRIVREEELDLSIKLLREASNDGAAAVDISAKVARISADVACRMVLGKKYMDQDLDEKGFKAVVQEDMLLGSMDTSATVIEWTLSELLKNPRVMKKVQMELETVVGMQRKVKESDLDKLEYLDMVIKENMRLHPVAPLLIPHQSREDCMVGDFFIPRKSRVVINAWAIMRDSSVWSEAEKFWPERFEGSNIDVRGHDFQFIPFGSGRRACPGMQMGLTMVRLTVAQLVHCFHWKLPSDMLPDHLDMTEEFGLTMPRANHLLA…
	Clan71	CYP736	Glyma.09G186000.1	MKSIMMSFIRWKTKGYVLISSSSMLFNQIQNSDQAPPPCPPGPPQLAIIRNLHVLGGSGTLPHRSLQSLSKRYSPIMSLQLGNVPTVVVSSPEAAELFLKTHDTVFANRPKFETALRLWSTGRTGETASKLASFGALRKREIGAMVESLKEAAMAREIVDVSERVGEVLRNMACKMVLGRNKDRRFDLKGYMSVSVAFILADYVPWLRLFDLQDQPIHPHDGHAHIIDKRSNKGIVFDMIIGSSETSKLVRHPRVMENLQNELKNVVGINKMVEENDLAKLCYLDTVVKETLRLHPVVPLLAPHESMEAIVIEGYYMKKKSRVIINAWAIGRHPKVWSENAEVFYPERFMNDNVDFKGQDFPLIPFGSGRTSCPGMVMGLTIVKLVLAQLLYCFHWGLP…
	Clan71	CYP736	Glyma.09G186200.1	MLSETLAIPAVLLVILILILSSVLFHLQDERTNPPGPKPLPIIGNLHMLGKLPHRSLQALAKNYGPIMFIKLGQVPTVVVSSPETAELFLKTHDTIFASRPKTLASEYMSYGSKGLAFSEYGPYWRNVKKLCTTQLLSASKVEMFAPLRREELGVFVKSLEKAAASRDVVNLSEQVGELISNIVCRMILGRSKDDRFDLKGLAREVLRLTGVFNIADYVPWTGFLDLQGLKGKMKKMSKAFDEVFEQIIKDHEDPSASNKNSVHSEDFVDILLSHMHQAVNQQEQKYVIGRTNIKAIILDMIAGSFDTSAVAVEWAMSELLRNPSDMKKLQEELNNVVGENKLVEESDLSKLPYLNMVVKETLRLYPAGPLLVPRESLEDITINGYHIKKKTRILVNAW…
	Clan71	CYP736	Glyma.09G186300.1	MLSETLAIPAVLLAILILILSSVLFHLQDERTNPPGPKPLPIIGNLHMLGKLPHRSLQALAKNYGPIMFIKLGQVPTVVVSSPETAELFLKTHDTIFASRPKTLASEYMSYGSKGLAFSEYGPYWRNVKKLCTTQLLSASKVEMFAPLRREELGVFVKSLEKAAASRDVVNLSEQVGELISNIVCRMILGRSKDDRFDLKGLAREVLRLAGVFNIADYVPWTGFLDLQGLKGKMKKMSKAFDEVFEQIIKDHEDPSASNKNSVHSEDFVDILLSHMHQAVNQQEQKYVIGRTNIKAIILDMIAGSFDTSTVAVEWAMSELLRNPSDMKKLQEELNNVVGEDKLVEESDLSKLPYLNMVVKETLRLYPAGPLLLPRESLEDITINGYHIKKKTRILVNAW…
	Clan71	CYP736	Glyma.09G186400.1	MLLETFTIPAALLVIFILILSYALFHPNQPQDDDKAHPPGPKPLPIIGNLHMLGKLPHRSLQALAKKYGPIMSIKLGQVPTIVVSSPETAELFLKTHDTVFASRPKTQASEYMSYGTKGLVFSEYGPYWRNMRKFCTTQLLSASKVDMFAPLRREELGLFVKSLEKAASSRDVVNISEQVGELMSNIVYKMILGRNKDDRFDLKGLTHEALHLSGVFNMADYVPWARAFDLQGLKRKFKKSKKAFDQVLEQTIKDHEDPTDSDKKSVHNSEDFVAILLSLMHQPMDQHEQKHVIDRTNVKAIILDMIGGSFDTSTSAIEWAMTELLRHPRVMKTLQDELNSVVGINKKVEESDLAKLPYLNMVVKETLRLYPVVPLLVPRESLENITINGYYIEKKSRI…
	Clan71	CYP736	Glyma.09G186500.1	MLLQTLAIPTILLVIFIWVVQPKQRHGKIAPGPKALPIIGNLHMLGKLPHRTLQTFARKYGPIMSLKLGQVQAIVVSSPETAELFLKTHDTVFASRPKIQASEYLSHGTKGLVFSEYSAYWRKVRKVCTLQLLSASKVDMFAPLRRQELGVLVKSLRNSAASREVVDLSEVLGELMENIVYKMVLGRARDHRFELKGLVHQVMNLVGAFNLADYMPWLGAFDPQGITRRLKKASKEIDQFLEQIIQDHEHNQYDNYKVQKAPHNNKDFVDILLSLMNQPIDLQGHQNVIDRTNIKAIILDMIMAAFDTSSTTVEWAMSELLRHQSVMKRLQDELENVVGMNRHVEEIDLEKLAYLNMVVKETLRLHPVAPLLVPRESREDVTIDGYFIKKKSRIIVNAW…
	Clan71	CYP75	Glyma.05G021800.1	MSTWVIGFATIIAAVLIYRVLKPISRPSSSLPLPPGPRPWPIVGNLPHMGPAPHQGLANLAQTHGPLMHLRLGFVDVVVAASASVAEQFLKIHDANFCSRPLNFRTTYLAYNKQDLVFAPYGPKWRFLRKLTTVHMFSAKAMDDFSQLRQEEVARLTCKLARSSSKAVNLRQLLNVCTTNALTRIMIGRRIFNDDSSGCDPKADEFKSMVGELMTLFGVFNIGDFIPALDWLDLQGVKAKTKKLHKKVDAFLTTILEEHKSFENDKHQGLLSALLSLTKDPQEGHTIVEPEIKAILANMLVAGTDTSSSTIEWAIAELIKNSRIMVQVQQELNVVVGQDRLVTELDLPHLPYLQAVVKETLRLHPPTPLSLPRFAENSCEIFNYHIPKGATLLVNVWAI…
	Clan71	CYP75	Glyma.05G021900.1	MSAWVIAFATVVAATLIYRLFKLITVPSLPLPPGPRPWPIVGNLPHMGPAPHQGLAALAQTHGPLMHLRLGFVDVVVASSASVAEQFLKIHDANFCSRPCNSRTTYLTYNQQDLVFAPYGPRWRFLRKLSTVHMFSAKAMDDFRELRQEEVERLTCNLARSSSKVVNLRQLLNVCTTNILARIMIGRRIFSDNSSNCDPRADEFKSMVVDLMVLAGVFNIGDFIPCLDWLDLQGVKPKTKKLYERFDKFLTSILEEHKISKNEKHQDLLSVFLSLKETPQGEHQLIESEIKAVLGDMFTAGTDTSSSTVEWAITELIKNPRIMIQVQQELNVVVGQDRLVTELDLPHLPYLQAVVKETLRLHPPTPLSLPRFAENSCEIFNYHIPKGATLLVNVWAIGR…
	Clan71	CYP75	Glyma.05G022100.1	MSPWVIAVATIVAAILIYRVLKHIAGPSLPLPPGPRPWPIVGNLPHMGPAPHQGLAALAKTHGPLMHLRLGFVHVVVAASAAVAEQFLKVHDANFCNRPYNFRTTYMTYNKKDIAFYPYGPRWRFLRKICTVHMFSGKAMDNFSQLRQEEVERLACNLTRSNSKAVNLRQLLNVCITNIMARITIGRRIFNDDSCNCDPRADEFKSMVEEHMALLGVFNIGDFIPPLDWLDLQGLKTKTKKLHKRFDILLSSILEEHKISKNAKHQDLLSVLLSLKETPQEGHELVEEEIKSILGDMFTAGTDTSLSTIEWAIAELIKNPKIMIKVQQELTTIVGQNRLVTELDLPHLPYLNAVVKETLRLHPPTPLSLPRVAEESCEIFNYHIPKGATLLVNVWAIGR…
	Clan71	CYP75	Glyma.06G202300.1	MSPLIVALATIAAAILIYRIIKFITRPSLPLPPGPKPWPIVGNLPHMGPVPHHSLAALARIHGPLMHLRLGFVDVVVAASASVAEQFLKIHDSNFSSRPPNAGAKYIAYNYQDLVFAPYGPRWRLLRKLTSVHLFSGKAMNEFRHLRQEEVARLTCNLASSDTKAVNLGQLLNVCTTNALARAMIGRRVFNDGNGGCDPRADEFKAMVMEVMVLAGVFNIGDFIPSLEWLDLQGVQAKMKKLHKRFDAFLTSIIEEHNNSSSKNENHKNFLSILLSLKDVRDDHGNHLTDTEIKALLLNMFTAGTDTSSSTTEWAIAELIKNPQILAKLQQELDTVVGRDRSVKEEDLAHLPYLQAVIKETFRLHPSTPLSVPRAAAESCEIFGYHIPKGATLLVNIWA…
	Clan71	CYP75	Glyma.13G072100.1	MDSLLLLKEIATSILIFLITRLSIQTFLKSYRQKLPPGPKGWPVVGALPLMGSMPHVTLAKMAKKYGPIMYLKMGTNNMVVASTPAAARAFLKTLDQNFSNRPSNAGATHLAYDARDMVFAHYGSRWKLLRKLSNLHMLGGKALDDWAQIRDEEMGHMLGAMYDCNKRDEAVVVAEMLTYSMANMIGQVILSRRVFETKGSESNEFKDMVVELMTVAGYFNIGDFIPFLAKLDLQGIERGMKKLHKKFDALLTSMIEEHVASSHKRKGKPDFLDMVMAHHSENSDGEELSLTNIKALLLNLFTAGTDTSSSIIEWSLAEMLKKPSIMKKAHEEMDQVIGRDRRLKESDIPKLPYFQAICKETYRKHPSTPLNLPRISSEPCQVNGYYIPENTRLNVNIW…
	Clan71	CYP75	Glyma.17G077700.3	MLPWLIIGLATIVAAILSYRLLKLIIRRPSLHLPPGPRPWPVVGNLPHIGPLLHRALAVLARTYGPLMYLRLGFVDVVVAASASVAEQFLKVHDANFSSRPLNSMTTYMTYNQKDLAFAPYGPRWRFLRKISSVHMFSVKALDDFRQLRQEEVERLTSNLASSGSTAVNLGQLVNVCTTNTLARVMIGRRLFNDSRSSWDAKADEFKSMVVELMVLNRVFNIGDFIPILDRLDLQGVKSKTKKLHKRFDTFLTSILEEHKIFKNEKHQDLYLTTLLSLKEAPQEGYKLDESEIKAILLDMFTAGTDTSSSTIEWAIAELIRNPRVMVRVQQEMDIVVGRDRRVTELDLPQLPYLQAVVKETFRLHPPTPLSLPRVATESCEIFDYHIPKGTTLLVNIWA…
	Clan71	CYP75	Glyma.20G041700.2	MSPSLEWPKSMVPSCTSKWAPKTWLSLLLCCSSCISQNPIQNFSNKPPNAGATHLAYDSQDMVFAHYGSRWKLLRKLSNLHMLGGKALDGWAQVREKEMGYMLGSMYDCSKKGEVVVVAEMLTYAMANMIGEVILSRRVFETKDSESNQFKDMVVELMTFAGYFNIGDFVPFLAWLDLQGIEREMKTLHKKFDLLLTRMIKEHVSSRSYNGKGKQDFLDILMDHCSKSNDGERLTLTNVKALLLNLFTAGTDTSSSIIEWALAEMLKYPNIIKRAHLEMVQVIGKNRRLDESDLKNLPYLQAICKETMRKHPSTPLNLPRVSSQPCQVNGYYIPKNTRLSVNIWAIGRDPEVWENSLEFNPERFVSGKGAKVDARGNDFELIPFGAGRRVCAGTRMGIV…
	Clan71	CYP76	Glyma.03G021200.1	MDYLLLLPLIITIVWINIHVFISSFKPLKSSKNPPGPRPFPIIGNILELGNQPHQALAKLSQIYGPIMSLKLGKTTTIVISSPQVAKEVLQKHDQIFANRTVPDTLRALDHHILSVVWMPPLAQWRTLRRVCATKVFSSQQLDSTQVFRQRKVQDLMDYVKERCEKGEALDIGEASFTTVLNSISNTFFSMDLAYYTSDKSQEFKDIVWGIMEEAGRPNVVDFFPIFRLLDPQGVRRRMNGYFGKLIAFFDGLIEERLRLRASENESKACNDVLDTVLELMLEENSQVTRPHVLHLFLDLFVAGIDTTSSTIEWAMAELLRNPEKLEIVRKELQQVLAKGEQLEESHISNLAYLQAVVKETFRLHPPIPMLVPHKSEVDVELCGFMVPKSAQILVNVWA…
	Clan71	CYP76	Glyma.03G189900.1	MAWTSEHPSLFLLLLSLSLPLFLFLLRRRNSKTSSSNHRLPPGPPGWPVFGNMFQLGDMPHRTLTNLRDKFGPVVWLKIGAMNTMAILSAEAATVFFKHHDHAFADRTITEIMRVHNYDKSSLALAPYGPYWRLMRRLVTVDMLVSKRINDTASIRRKCVNDMINWVAKEASKSEHGRGVHVSRFVFLMTFNLFGNLMLSRDLFDPESEDGSEFFSAMMGLMEWTGHANVTDLFPWLSWLDPQGLRRKMDRDMGKALGIASRFVKQRLEQQLHRGTNKSRDFLDVLIDFQSTNSQEALNVSDKDLNIFILEMFLAGSETTSSTIEWAMTELLCNRECLLKVKRELSWVVGCGREVEESDIDKLPYLQGVVKETLRLHPPIPLLVPRKATEDTEFMGYYI…
	Clan71	CYP76	Glyma.07G083000.1	MDYLLLLPLITIVWISIHVLISSFKPLKSSKNPPGPHPFPIIGNILELGNQPHQALAKLSQIYGPIMSLKLGNTTTIVISSPQVAKEVLQKNDQILANRMVPDCVRALDHHILSVAWMPPLPQWRALRRACATKVFSSQQLNFTQVLRQRKMQDLMDYVKERCERGEAMDIGEASFTTVLNSISNTFFSMDLAYYTSDKSQEFKDIIWGIMEEAGRPNVVDFFPIFRLLDPQGARRRMSGYFRKLIAFFDGLVEERLRLRALENGSRECNDVLDSLLELMLEDNSQVTRPHVLHLFLDLFVAGIDTTSSTIEWVMAELLRNPEKLEKVRQELQQVLAKGEQLEESHISNLPYLQAVVKETFRLHPPTPMLLPHKSEVDIELCGFMVPKSAQILVNLWAT…
	Clan71	CYP76	Glyma.07G083000.2	MDYLLLLPLITIVWISIHVLISSFKPLKSSKNPPGPHPFPIIGNILELGNQPHQALAKLSQIYGPIMSLKLGNTTTIVISSPQVAKEVLQKNDQILANRMVPDCVRALDHHILSVAWMPPLPQWRALRRACATKVFSSQQLNFTQVLRQRKMQDLMDYVKERCERGEAMDIEFKDIIWGIMEEAGRPNVVDFFPIFRLLDPQGARRRMSGYFRKLIAFFDGLVEERLRLRALENGSRECNDVLDSLLELMLEDNSQVTRPHVLHLFLDLFVAGIDTTSSTIEWVMAELLRNPEKLEKVRQELQQVLAKGEQLEESHISNLPYLQAVVKETFRLHPPTPMLLPHKSEVDIELCGFMVPKSAQILVNLWATGRDSSIWTNPDEFTPERFLESDIDFKGHDF…
	Clan71	CYP76	Glyma.10G200800.1	MDTVLSTTLLLMLACSIVHVLRSLQARMRRKSNYNLPPGPSLLTIIRNSKQLYKKPQQTMAKLAKTYGPIMRFTIGQSTTIVISSIEATQEVLQTHDSLFSDRTNPDITTSYNHNRYSLVFLPVSPLWQELRKICHGNLFSAKTLDASTDLRRMKMKELLTDIRQRSLNGEVVDIGRAAFMACINFLSYTFLSLDFVPSVGDGEYKHIVGTLLKATGTPNLVDYFPVLRVFDPQGIRRHTTNYIDKLFDVFDPMIDERMRRRGEKGYATSHDMLDILLDISDQSSEKIHRKQIKHLFLDLFVAGTDTTAYGLERTMTELMHNPEAMRKAKKEIAETIGVGKPVEESDVARLPYLQSVIKESLRMHPPAPLLLPRRAKTDVQVCGYTVPQGTQILINEWA…
	Clan71	CYP76	Glyma.10G203500.1	MQQRHPLSFSLISLPVLSPINIHSNNMEFVTCALFLLLACATIGSFLAKTTRKPNHNLPPGPSRLPIIGNLLELGQNPHQSMAKLAKIHGPVMSLKLGTVTTIVISSADMAKEVLVTHDESLSNRPIPQSVSVLNHEHYSLAFLPVSPLWREMRKICNGQLFAHKTLDESQDVRRKIVQQLLSDVHKSCQIGEAVDVGRQAFKTTLNLLSNTIFSEDLVLSKGTAGEFKDLVTNITKLVGSPNMADYFPVLKRIDPQGAKRQQTKNVAKVLDIFDGLIRKRLKLRESKGSNTHNDMLDALLDISKENEMMDKTIIEHLAHDLFVAGTDTTSSTIEWAMTEVVLNPEIMSRAKKELEEVIGKGKPVEESDIGKLPYLQAIIKETFRLHPPVPFLLPRKAE…
	Clan71	CYP76	Glyma.10G296400.1	MEYEVVSLLALTILILVWRMLMDRRRQHGKLPPGPRCWPVVGNIFQLAGWLPHESLAKLAHKHGPIMTLWLGSMCTVVISSSQVARHMFKNHDVILAGRKIYEAMRGDHGSEGSLITSQYNSHWRMLKRLCTTELFVTTRLDAMQGVRAKCIHRMLHLIQQAGQSGTCAVDVGRFFFLMDFNLIGNLIFSKDLLDSEMERGDCFYYHALKVMEYAGKPNVADFLPILKGLDPQGIRRNTQFHVNQAFEIAGLFIKERMENGCSETGSKETKDYLDVLLNFRGDGVTEPYTFSSRTINVIVFEMFTAGTDTTTSTIEWAMAELLHNPKALKKVQMELRSKIGPDRNMEEKDIENLPYLQAVIKETLRLHPPLPFLVPHMAMDSCNMLGYNIPQGSQILVN…
	Clan71	CYP76	Glyma.11G108300.1	MMELFLSCMVLFVLTLATLGAHWIWVVSSSRAGSKLPPGPFPLPIIGNLLALGKKPHQSLAKLAETHGPIMTLKFGQVTTIVVSSADMAKEVLLTHDHSLSSNRVIPQAVQVHNHHNHSITFLPVSPLWRDLRKICIANLFSNKTLDASQDLRRSKLHQLLHDIHRSSLAGEAVDVGKAVFNTSMNLLSNTFFSLDLVHSSSSAAAVDFKDLVLKIMEESGKPNLADFFPVLKFMDPQGIKTRTTVYTGKIIDTFRALIHQRLKLRENNHGHDTNNDMLNTLLNCQEMDQTKIEHLALTLFVAGTDTITSTVEWAMAELLQNEKAMSKAKQELEETIGRGKAVEESDIGRLPYLQAVIKETFRLHPAVPFLIPRKANADVEISGGYTIPKDAQVFVNVW…
	Clan71	CYP76	Glyma.13G265300.1	MDFVISSILLLLACITIHVLSNTITRKRNHNKLPPGPSPLTLLENLVELGKKPKQTLAKLARLHGPIMRLKLGQLTTIVISSPDIAKEVFQTHDLLFSNRTIPHSTSVHNHSHNSVAFLPISPLWRDLRKICNNQLFSHKSLDASQNLRRKKTQELLGDVHRSSLSGEAVDIGTLVFRTSINFLSNIFFSLDFVNSVGETEEYKVIVENLGRAIATPNLEDFFPMLKMVDPQGIRRRATTYVSKLFAIFDRLIDKRLEIGDGTNSDDMLDILLNISQEDGQKIDHKKIKHLFLDLIVAGTDTTSYTMEWAMAELINNPDTMSKAKRELEQTIGIGNPIEESDIARLPYLRAIIKETLRMHPGAPLLLPRKANVDVEINGYTIPQGAQIIINEWAIGRNP…
	Clan71	CYP76	Glyma.18G222900.1	MDYHTTVLLLITFVSATIILIFIRRLFNQTSESEYAKLPPGPRPFPIIGNILELGTNPHIALTKFSKIYGPLMTFKLGRITTIVISSPQVAKEVLLENGQVLSSRTIPHSVHALDHHIYSTVWLPPSAQWRNLRRVCATKIFSPQLLDSTQILRQQKVKDLLDFVKERCKKGGVVDIGEVVFTTILNSISTTFFSMDLSDSTSEKSHEFMNIIRGIMEEIGRPNVADLFPILRPLDPQRVLARTTNYFKRLLKIIDEIIEERMPSRVSKSDHSKVCKDVLDSLLNDIEETGSLLSRNEMLHLFLDLLVAGVDTTSSTVEWIMAELLRNPDKLVKARKELSKAIGKDVTLEESQILKLPFLQAVVKETLRLHPPGPLLVPHKCDEMVNISGFNVPKNAQI…
	Clan71	CYP76	Glyma.18G223100.1	MDYQTILLFITFVNAIILIFIPKLFNHTPESTNLPPGPHPFSIIGNILEIATNPHKAATKLSRIYGPLMTLKIGSITTIVISSPQLAKQVLHENGPVFSSRTIPHSVHALDHHKYSIVFMHPSPKWRKLRRVCATKIFSPQALDSTQILRQQKVHKLLDFVEERCKKGEVLDIGEAIFTTTLNSISTTLFSMDLSNSTSEESQENKNIIRAMMEEAGRPNVADFFPILRPLDPQRSFARMSNYFKKMFKIIDGITEERMCSRLLETDSKVYKDVLDSLINIEETGYQLSHNEMLHLFLDLLVAGIDTTSNTVEWIMAELLRNPDKMEKARKELSQTIDKDAIIEESHILKLPFLQAVVKETLRLHPPAPFLVPHKCDEMVSISSFNVPKNAQVLVNVWA…
	Clan71	CYP76	Glyma.20G147900.1	MDIASCALLIVLTCAIVHALLGSFLAMATKANHKLPPGPSRVPIIGNLLELGEKPHKSLAKLAKIHGPIMSLKLGQITTVVVSSAQMAKEVLLTNDQFLSNRTIPQSVSVLNHEQYSLAFMPISPFWRELRKICNTQLFAHKSLDASQDVRRKIVQQLVSDIHQSSQIGEAVDIGTAAFKTTINLLSNTIFSMDLIHSTGKAEEFKDLVTNITKLVGTPNLADFFPVLKMVDPQSIKRRQSKNSKKVLDMFNHLVSQRLKQREDGKVHNDMLDAMLNISNDNKYMDKNMIEHLSHDIFVAGTDTTASTLEWAMTELVRNPDVMSKAKQELEQMTSKGNPIEEADIAKLPYLQAIVKETLRLHPPVPFLLPRKAGKDVDIGGYTIPKDAKVLVNMWTICR…
	Clan71	CYP76	Glyma.20G148000.1	MDIASCALLIVLTCAIVHALLGSFLAMATKANHKLPPGPSRVPIIGNLLELGEKPHKSLAKLAKIHGPIMSLKLGQITTVVVSSAQMAKEVLLTNDQFLSNRTIPQSVSVLNHEQYSLAFMPISPLWRELRKICNTQLFAHKSLDASQDVRRKIVQQLVSDIHQSSQIGEAVDIGTAAFKTTINLLSNTIFSMDLIHSTGKAEEFKDLVTNITKLVGTPNLADFFQVLKLVDPQGVKRRQSKNVKKVLDMFDDLVSQRLKQREEGKVHNDMLDAMLNISKDNKYMDKNMIEHLSHDIFVAGTDTTASTLEWAMTELVRNPDVMSKAKQELEQMISKGNNPIEEADIGKLPYLQAIIKETLRLHPPVPFLLPRKADKDVDIGGYTIPKDAQVLVNTWTIC…
	Clan71	CYP76	Glyma.20G189600.1	MDTILSTTLFLMLTCSIMHVLRSLHARIRRKSNYNLPPGPSLLTIIRNSVQLYKKPQQTMAKLAKTYGPIMRFTIGQSTTIVISSIEATKEILQTHESLFSDRTNPDITTSYNHNRYSLVFLPVSPLWQELRKICHGNLFSAKTLDASTELRRMKMKELLTDIRQRSLNGEVVDIGRAAFMACINFLSYTFLSLDFVPSVGDGEYKHIVGTLLKATGTPNLVDYFPVLRVFDPQGIRRHTTNYIDKLFDVLDPMIDERMRRRQEKGYVTSHDMLDILLDISDQSSEKIHRKQIKHLFLDLFVAGTDTTAYGLERTMTELMHNPEAMLKAKKEIAETIGVGNPVEESDVARLPYLQAVIKESLRMHPPAPLLLPRRAKTDVQVCGYTVPEGAQVLINEWA…
	Clan71	CYP77	Glyma.07G258800.1	MQVTDVILLGLCLLFLRWWWRRWSTTGGGPKNLPPGPPGWPIVGNLFQVILQRRHFIYVIRDLHKKYGPIFTMQMGQRTLIIVSSAELIHEALIQRGPLFASRPKDSPIRLIFSVGKCAINSAEYGPLWRTLRKNFVTEMITPLRIKQCSWIRKWAMEAHMRRIQQEAREQGFVQVMSNCRLTICSILICICFGAKIEEKRIKSIESILKDVMLITLPKLPDFLPVFTPLFRRQVKEAEELRRRQVELLAPLIRSRKAYVEGNNSDMASPVGAAYVDSLFGLEVPGRGRLGEEELVTLVSEIISAGTDTSATALEWALLHLVMDQEIQERLYREIVGCVGKDGVVTESHVEKMPYLSAVVKETFRRHPPSHFVLSHAATEETKLGGYTVPKEASVEFYT…
	Clan71	CYP77	Glyma.10G202400.1	MHHPHPLHLINHLIPSLPKMATLPSYDHLIFTALAFFLSGLIFFLKHKSKSKSKKFNLPPGPPGWPIVGNLFQVARSGKPFFEYVNDVRLKYGSIFTLKMGTRTMIILTDSKLVHEAMIQKGATYATRPPENPTRTIFSENKFTVNAATYGPVWKSLRRNMVQNMLSSTRLKEFRSVRDNAMDKLINRLKDEAENNNGAVWVLKDARFAVFCILVAMCFGLEMDEETVERIDQVMKSVLITLDPRIDDYLPILSPFFSKQRKKALEVRREQVEFLVPIIEQRRRAIQNPGSDHTATTFSYLDTLFDLKVEGKKSAPSDAELVSLCSEFLNGGTDTTATAVEWGIAQLIANPHVQKKLYEEIKRTVGEKKVDEKDVEKMPYLHAVVKELLRKHPPTHFVL…
	Clan71	CYP77	Glyma.17G015400.1	MQATDIILLGLGLLFVRWWWRRWSTTGGGPKNLPPGPPGWPIVGNLFQVILQRRHFIYVIRDLRKKYGPIFSMQMGQRTLIIVSSAELIHEALIQRGPLFASRPRDSPIRLIFSMGKCAINSAEYGPLWRTLRKNFVTEMITPLRIKQCSWIRKWAMEAHMKRIQQEAREQGFVQVMSNCRLTICSILICICFGAKIEEKRIKSIESILKDVMLITLPKLPDFLPVFTPLFRRQVKEAKELRRRQVELLAPLIRSRKAFVEGNLLELGNHYDMASPVGAAYVDSLFNLEVPGRGRLGEEELVTLVSEIISAGTDTSATAVEWALLHLVMDQDIQERLYKEIVECVGKDGVVTESHVEKMPYLSAVVKETFRRHPPSHFVLSHAATEETELGGYTVPKEA…
	Clan71	CYP77	Glyma.20G188000.1	MIVEKEKKGTHTTTTTTFFFFFFFCSLFNLDSALIKPTYNFTLPFIFIPSMHHPPLHLINHLILLQFPKMATLSSYDHFIFTALAFFISGLIFFLKQKSKSKKFNLPPGPPGWPIVGNLFQVARSGKPFFEYVNDVRLKYGSIFTLKMGTRTMIILTDAKLVHEAMIQKGATYATRPPENPTRTIFSENKFTVNAATYGPVWKSLRRNMVQNMLSSTRLKEFRSVRDNAMDKLINRLKDEAEKNNGVVWVLKDARFAVFCILVAMCFGLEMDEETVERIDQVMKSVLITLDPRIDDYLPILSPFFSKQRKKALEVRREQVEFLVPIIEQRRRAIQNPGSDHTATTFSYLDTLFDLKVEGKKSAPSDAELVSLCSEFLNGGTDTTATAVEWGIAQLIANP…
	Clan71	CYP78	Glyma.01G061100.1	MSPDFTLLFFPELIQPPIVTLQAALCILLLTFLLTFFLTPGGLAWAWATKSSTRPIIPGPVMALLSVFTGSTPHRRLSMLARSYHAEKLMAFSIGLTRFVISSEPETAKEILGSPGFADRPVKESAYQLLFHRAMGFAPYGEYWRNLRRISALHLFSPKRITGSEAFRNEVGLKMVDEVKKVMKDNRHVEVKRILHYGSLNNVMMTVFGKCYEFYEGEGVELEALVSEGYELLGVFNWSDHFPVLGWLDLQGVRKRCRCLVEKVNAFVGGVIEEHRVKRVRGGCVKDEGTGDFVDVLLDLENENKLSEADMIAVLWEMIFRGTDTVAILLEWILARMVLHPDIQAKAQREIDSVCGPYRLVSEADMPNLRYLQGIVKETLRVHPPGPLLSWARLAVHDV…
	Clan71	CYP78	Glyma.02G119600.1	MSPDFTLLFFPELMQSPMITFQATLCVLLFTLMFTLLFTPGGLPWAWARPRPIIPGPVTALLGIFTGSTPHRALSKLARNYHAEKLMAFSIGLTRFVISSEPETAKEILGSPSFADRPVKESAYELLFHRAMGFAPYGEYWRNLRRISALHLFSPKRITGSESFRSEVGLKMVEQVKKTMSENQHVEVKKILHFSSLNNVMMTVFGKSYEFYEGEGLELEGLVSEGYELLGVFNWSDHFPVLGWLDLQGVRKRCRCLVEKVNVFVGGVIKEHRVKRERGECVKDEGTGDFVDVLLDLEKENRLSEADMIAVLWEMIFRGTDTVAILLEWTLARMVLHPEIQAKAQREIDFVCGSSRPVSEADIPNLRYLQCIVKETLRVHPPGPLLSWARLAVHDVTVG…
	Clan71	CYP78	Glyma.05G019200.1	MSSSELSSFFLLPLSAILSFDALLGVMFLVAVFGYWLVPGGLAWALSKFKPAIPGPCGYPVVGLVWAFIGPLTHRVLAKLAETFDAKPLMAFSVGFTRFIISSHPDTAKEILNSSAFADRPVKESAYELLFHRAMGFAPYGEYWRNLRRISATHMFSPKRIAAQGVFRARVGAQMVREIVGLMGKNDVVEVRKVLHFGSLNNVMKSVFGRSYVFGEGGDGCELEELVSEGYDLLGLFNWSDHFPLLGWLDFQGVRKRCRSLVDRVNVFVGKIIMEHRVKRDAESEDNKARDIDNSGGDFVDVLLDLEKEDRLNHSDMVAVLWEMIFRGTDTVAILLEWILARMVLHPEIQAKAQCEIDSVVGSGCSVTDDDLPNLPYVRAIVKETLRMHPPGPLLSWAR…
	Clan71	CYP78	Glyma.05G147100.1	MKPTATFFFLLPSTTLVVCLCLGIGTTTLFITLLAISLNYWLVPGGFAWRNYDYYQTKKKLTGPMGWPILGTLPLMGSLAHQKLAALATSLNAKRLMALSLGPTPVVISSHPETAREILLGSSFSDRPIKESARALMFERAIGFAHSGTYWRHLRRIAAFHMFSPRRIHGLEGLRQRVGDDMVKSAWREMGEKGVVEVRRVFQEGSLCNILESVFGSNDKSEELRDMVREGYELIAMFNLEDYFPFKFLDFHGVKRRCHKLAAKVGSVVGQIVEERKRDGGFVGKNDFLSTLLSLPKEERLADSDLVAILWEMVFRGTDTVAILLEWVMARMVLHQDLQKKAREEIDTCVGQNSHVRDSDIANLPYLQAIVKEVLRLHPPGPLLSWARLAVHDVHADKV…
	Clan71	CYP78	Glyma.07G052300.1	MTTHIDNLWVLALVSKCTQENIAWSLLTIMVTLWLSMTFFCWSHPGGPAWGKYYSFHYWKKTTTTTTSTSNNTNSNNLKMIPGPKGYPFIGSMSLMTSLAHHRIAAAAQACKATRLMAFSMGDTRVIVTCHPHVAKEILNSSVFADRPIKESAYSLMFNRAIGFAPYGVYWRTLRRIAATHLFCPKQIKASELQRAEIAAQMTHSFRNRRGGFGIRSVLKRASLNNMMWSVFGQRYDLDETNTSVDELSRLVEQGYDLLGTLNWGDHIPFLKDFDLQKIRFTCSKLVPQVNRFVGSIIADHQTDTTQTNRDFVHVLLSLQGPDKLSHSDMIAVLWEMIFRGTDTVAVLIEWIMARMVLHPEVQRRVQEELDAVVGGGARALKEEDVAATAYLLAVVKEV…
	Clan71	CYP78	Glyma.08G104100.1	MKPTATFFFLLSTTTLLVCLCLGTTTFQTTLFITFFTISLNYWLVPGGFAWRNYHSYHTNEKPNKKLTGPMGWPILGSLPLMGSLAHQKLAALAATLNAKRLMALSLGPTPVVISSHPETAREILLGSSFSDRPIKESARALMFERAIGFAPSGTYWRHLRRIAAFHMFSPRRIQGLEGLRQRVGDDMVKSAWKEMEMKGVVEVRGVFQEGSLCNILESVFGSNDKSEELGDMVREGYELIAMLNLEDYFPLKFLDFHGVKRRCHKLAAKVGSVVGQIVEDRKREGSFVVKNDFLSTLLSLPKEERLADSDMAAILWEMVFRGTDTVAILLEWVMARMVLHQDVQKKAREEIDTCIGQNSHVRDSDIANLPYLQAIVKEVLRLHPPGPLLSWARLAVND…
	Clan71	CYP78	Glyma.11G250200.1	MIPTLVCIGTTIFQSTLSSYSLSFISLFLSTSLALLAISLNYWLVPGGFAWRKYHSRYKGHAKVSGPMGWPILGTLPAMGPLAHRKLAAMATSPKAKKLMTLSLGTNPVVISSHPETAREILCGSNFADRPVKESARMLMFERAIGFAPYGTYWRHLRKVAITHMFSPRRISDLESLRQHVVGEMVMRIWKEMGDKGVVEVRGILYEGSLSHMLECVFGINNSLGSQTKEALGDMVEEGYDLIAKFNWADYFPFGFLDFHGVKRRCHKLATKVNSVVGKIVEERKNSGKYVGQNDFLSALLLLPKEESIGDSDVVAILWEMIFRGTDTIAILLEWIMAMMVLHQDVQMKARQEIDSCIKQNGYMRDSDIPNLPYLQAIVKEVLRLHPPGPLLSWARLAI…
	Clan71	CYP78	Glyma.16G021200.1	MSTHIESLWVLALASKCIQENIAWSLLIIMVTLWLTMTFFYWSHPGGPAWGKYYYFNYWKKTTSTNTNINLKMIIPGPRGYPFIGSMSLMTSLAHHRIAAAGEACNATRLMAFSMGDTRAIVTCNPDVAKEILNSSTFADRPIKESAYSLMFNRAIGFAPYGVYWRTLRRIAATHLFCPKQIKASELQRAEIAAQMTNSFRNHRCSGGFGIRSVLKRASLNNMMWSVFGQKYNLDEINTAMDELSMLVEQGYDLLGTLNWGDHIPFLKDFDLQKIRFTCSKLVPQVNRFVGSIIADHQADTTQTNRDFVHVLLSLQGPDKLSHSDMIAVLWEMIFRGTDTVAVLIEWILARMVLHPEVQRKVQEELDAVVRGGALTEEVVAATAYLAAVVKEVLRLHPP…
	Clan71	CYP78	Glyma.17G080500.1	MSSSELSSFFLLRLSDILSFDVLLGVMFLVAVFGYWLVPGGLAWAFSKFKPAIPGPSGYPVVGLVWAFIGPLTHRVLAKLAETFDAKPLMAFSVGFTRFIISSHPDTAKEILNSSAFADRPVKESAYELLFHRAMGFAPYGEYWRNLRRISATHMFSPRRIAAQGVFRARIGAQMVRDIVGLMGRDGVVEVRKVLHFGSLNNVMKSVFGRSYVFGEGGDGCELEGLVSEGYHLLGVFNWSDHFPLLGWLDLQGVRKSCRSLVDRVNVYVGKIILEHRVKRVAQGEDNKAIDTDSSGDFVDVLLDLEKENRLNHSDMVAVLWEMIFRGTDTVAILLEWILARMVLHPEIQAKAQSEIDSVVGSGRSVSDDDLPNLPYVRAIVKETLRMHPPGPLLSWARL…
	Clan71	CYP78	Glyma.19G240800.1	MSPDFTLLFSPELMQSPIITFQATFCVLLFTLMFTPFFTPGGLPWAWARPRTIIPGPVTALLGVFTGSTPHSALSKLARTYHAEKLMAFSIGLTRFVISSEPETAKEILGSPGFADRPVKESAYELLFHRAMGFAPYGEYWRNLRRISALHLFSPKRITSSESFRSKVGLKMVEQVKKTMSENQHVEVKKILHFSSLNNVMMTVFGKCYEFYEGEGLELEGLVSEGYELLGVFNWSDHFPVLGWLDLQGVRKRCRCLVEKVNVFVGGVIKEHRVKRERGDCVKDEGAEDFVDVLLDLEKENRLSEADMIAVLWEMIFRGTDTVAILLEWILARMVLHPEIQAKAQREIDFVCGSSRLVSEADIPNLRYLQCIVKETLRVHPPGPLLSWARLAVHDVTVG…
	Clan71	CYP78	Glyma.19G258700.1	MTSHIDDNLWIIALTSKCTQENLAWVLLIMGSLWLTMTFYYWSHPGGPAWGKYYTYSPPLSIIPGPKGFPLIGSMGLMISLAHHRIAAAAATCRAKRLMAFSLGDTRVIVTCHPDVAKEILNSSVFADRPVKESAYSLMFNRAIGFASYGVYWRSLRRIASNHFFCPRQIKASELQRSQIAAQMVHILNNKRHRSLRVRQVLKKASLSNMMCSVFGQEYKLHDPNSGMEDLGILVDQGYDLLGLFNWADHLPFLAHFDAQNIRFRCSNLVPMVNRFVGTIIAEHRASKTETNRDFVDVLLSLPEPDQLSDSDMIAVLWEMIFRGTDTVAVLIEWILARMALHPHVQSKVQEELDAVVGKARAVAEDDVAVMTYLPAVVKEVLRLHPPGPLLSWARLSIN…
	Clan71	CYP79	Glyma.11G197300.1	MAHSPFLLLSNLQGFWPSLLAMIACFIIMIKALRNNFIENYSNKQKPKLPPGPKPWPIVGNLPEMLANKPAHKWIHNLMKEMNTEIACIRLGNAYVIPVTCPTIASEFLRKQDATFASRSQTVSTDLISNGYSTAVFGPFGAQWKKMKKILTNNLLSPHKHLWLHGQRTEEADNLMFHVYNKCKNVNDGVGGLVNIRSVARHYCGNLTRKIIFNTRYFGKGREDGGPGFEEVEHVDSIFHLLEYVNAFSVSDYVPCLRGLDLDGHEKKVKEALKIIKKYHDPIVQERIKLWNDGLKVDEEDWLDVLVSLKDSNNNPSLTLEEINAQIIELMIATIDNPSNAFEWALAEMINQPELLHRAVEELDSVVGKERLVQESDIPKLNYVKACAREAFRLHPISP…
	Clan71	CYP79	Glyma.11G197400.1	MGYAPAFIWPHLQSFLIYLIVMFCGFTITKILRYHLVVKPKLPPGPKPWPIVGNLPQMLANKPVFCWIHNLMQEMKTEIACIRLGNVHVIPVTCPSIACEFLRKHDVNFASRPLTMATDIMSSGYVTIAIVPFGEQWKKMRRIVVNELFSPLRHQWLQGKRNGEADNIMFYVYNKCKNVNNGGLVNVRDVAQHYCCNVTRKLIFNTRYFGKGREDGGPGLEEVEHVNTIFTLLKHVYAFSVSDYIPCLRILDLDGHKSKVKKGMRTMKKYHDPIIEKRMKQWNDGSKTVEEDLLDVLISLKDVNNNPTLTLKEIKALTIELMLGGADNPSNAVECALAEMINQPYILQQATEEVDKVVGKQRMVQESDITNLNYVKACVREAFRLHPVVPFNPPHVSTN…
	Clan71	CYP79	Glyma.13G051600.1	MAHSPFLLLPNLQGFWPSLLAMITCFIIMIKALRNNFIENYSNKQKPKLPPGPKPWPIVGNLPEMLANKPAHKWIHNLMKEMNTEIACIRLGNAYVIPVTCPTIAREFLRKQDATFASRSQSVSTDLISNGYSTTIFGPFGAQWKKMKKILTNDLLSPHKHLWLHGQRTEEADNLMFHVYNKCKNVNDGVGGLVNIRSVARHYCGNLTRKIIFNTRYFGKGREDGGPGFEEVEHVDSIFDLLKYVYAFSVSDYMPCLRGLDLDGHEKNVKEALKIIKKYHDPIVQERIKLWNDGLKVDEEDWLDVLVSLKDSNNNPLLTLEEINAQIIELMLATIDNPSNAFEWALAEMINQPELLHRAVEELDSVVGKERLVQESDIPKLNYVKACAREALRLHPIAP…
	Clan71	CYP79	Glyma.20G065000.1	MDHSLLIIIIIFSITFLKAFRSHLFKKSKKQELPLPPGPKPWPIIGNLPEMLTHRPTFRWIQNLMKEMNTEIACIRLGNVHVIPVTCPTIAREFLRKQDATFASRPNSITTSLISRGYLSTTLVPFGEQWKKMRRIVSNDLLSTTTHQRLENKRVEEADNLVFYIYNKCKNNVNDNVCLVNVRYVAQHYSCNVIKKLIFSTRYFGEGKKDGGPGREEEEHVDSIFTMLKYIYDFSVSDYVPFLRGLDLDGHEGKVKKALEIVEKYHDPIIEQRIKERNNGSKIDGEDFLDILISLKDANNNPMLTTQEIKAQITELMMAAMDNPTNAFEWGLGEMINQPKLLQRAVEELDTVVGKERLVQESDIPKLNYIKACAREAFRLHPIVPFNVPHVSLKDTIVG…
	Clan71	CYP79	Glyma.20G065100.1	MDHSSIHLLSHLHLQALWTSLIIIVVFCITFLKGFGPHLFKRTKKQKLPLPPGPKPWPIIGNLPEMVANRPTFRWIQKLMNEMNTEIACIQLGNVHVIPVTCPTIACEFLRKQDANFASRPTSMTTTLISRGYLTTTLVPFGEQWKKMRRIVGNDLLSTTSHQRLEYKRVEEANNLVFHIYNNCKNNIANGNNNVGLVNVRDVAQHYCCNVMKKLNFSRRYFGEGKKDGGPGSEEVEHLDAIFTMLKYIYDFRVSDYVPCLRGLDLDGHEGKVKKAIETVGKYHDPIIEQRIKEWDEGSKIHGEDFLDILISLKDANNNPMLTTQEIKAQIIELMMAGVDNPSNAVEWGLAEMINQPKLLQRATEELDKVVGKERLVQESDISKLNYIKACAREAFRLH…
	Clan71	CYP81	Glyma.08G089400.1	MGPLLYSSLLVLVLILRFVQRRRVKNLPPCPPSLPLIGNLHYIKSPLHRSLLSLSEKYGPIFSLWFGSRFVVVISSPTLLQECFTKHDIVLANRPRFLTGKYLFYNYSSMGSSPYGDHWRNLRRIITIDVLSTSRLNSFFEIRREETMRVIQKLARETCNGFALVHLRPRLTEMTFNNMMRMISGKRYYGDDIEAADAEEAKQFRDIMTEVMSLLGANNKGDFLPFLRWFDFDGLEKRLKVISTRADSFLQGLLEEHRSGKHKANTMIEHLLTMQESQPHYYSDHIIKGLIQGMLLAGTDTTAVAIEWAVSSLLNHPEILKKAKDEIDNMVGQDRLVDESDIPKLPYLQNIIYETLRLFAPAPLLLPHYSSEECTIGGFTIPRDTIVLINAWAIQRDPE…
	Clan71	CYP81	Glyma.08G089500.1	MEILSFLSYSLLYVFLFLLLKLLLQARKFQNLPPGPPSLPIIGNLHHLKRPLHRTFRALSDKYGHVISLWFGSRLVVVVSSQTLFQECFTKNDVVLANRPRFLSGKHIFYNYTTLGSSPYGEHWRNLRRITALDVLSTHRLHSFAAIRRDETHRLVRKLAEAQGSESSLSFAEVELTSKFYDMTFNNIMRMISGKRYYGDDCDMADVEEAKQFRAMVSELLKLAGANNKNDFMPVLRLFDFENLEKRLKKISNKTDTFLRGLLEEIRAKKQRANTMLDHLLSLQESQPEYYTDQIIKGLALGMLIAATDSQAVTLEWALSCVLNHPEVFKRARDELETHVGQDHLLEESDLSKLPYLKNIIYETLRLYTPAPLLLPHSSSEECIIGGFKVPGDTIVLIN…
	Clan71	CYP81	Glyma.09G048700.2	MEMFPLLPYFLLSSLVFLLTFKLLFSQRRKHKNLPPGPPPLPIIGNLNLLERPLHRFLTRTSKTYGDIFSLWFGSRLAVVVSSPSAFQECFTRNDVALANRPRSLSGKHIFYNYTTVGSCSYGEHWRNLRRITSLDVLSTQRIHSFSGIRKDETERFIRMLAKDSCMDYAHVELSSMFHDMTYNNMMRMLSGKRYYGDESQIKDVEEAKEFRETVEELLQVAGVSNKADYLPFLRWFDFHNLEKRLKSINKRFDTFLDKLIHEQRSKKERENTMIDHLLHLQESQPEYYTDQIIKGLVLAMLFAGTDSSAVTLEWSLSNLLNHPEVLKKARDELDTYVGQDRLVNESDLPNLFYLKKIILETLRLHPPAPLAIPHVSSEDITIGEFNVPRDTIVMINIW…
	Clan71	CYP81	Glyma.09G048800.1	MFPLLPCFLYSLAFILTFKLLFQRRKYKNLPPGPPPLPIIGNLNLLENPLHRFFQRMSKTHGNIFSLWFGSRLAVVVSSPSAFQECFTKNDVVLANRPRSLSGKHIFYNYTTVGSSSYGEHWRNLRRIIALDVLSTQRIHSFTGIRKDETERLIRILAKDSCMDYAHVELGSMFHDLTYNNMMRMISGKRYYGDESQIKDVEEAKEFRETVAEMLQLTGVSNKSDYLPFLRWFDFQNLEKKLKSIHKRFDTFLDKLIHEQRSKKKQRENTMIDHLLNLQESQPEYYTDKIIKGLILAMLFAGTDSSAVTLEWSLSNLLNHPKVLMKVRDELDTQVGQERLVNESDLPNLPYLRKIILETLRLYPHAPLAIPHVSLDDITIKEFNIPRDTIVMVNIWAMQ…
	Clan71	CYP81	Glyma.09G048900.1	MGMLLLLSSYSLLFLVLFLTLKSLFQSRKLRNLPPGPPPLPIIGNLNLLEQPIHRFFQRMSKEYGNIVSLWFGSRLAVVISSPTAYQECFTKHDVALANRLPSLSGKYIFYNNTTVGSCSHGEHWRNLRRITSLDVLSTQRVHSFSGIRSDETKRLVQRLLQAKNSKEGFARVEISSMFNDLTYNNIMRMISGKRFYGEESELKNVEKAREFRETVTEMLELMGVANKGDHLPFLRWFDFQNVEKRLKSISKRYDTILNEIIDENRSKKDRENSMIDHLLKLQETQPEYYTDQIIKGLALAMLFGGTDSSTGTLEWSLSNLLNHPEVLKKAKEELDTQVGQDRLLNESDLPKLPYLRKIILETLRLYPPAPILIPHVSSEDITIEGFNVPRDTIVIING…
	Clan71	CYP81	Glyma.09G049100.1	MTVITMPPFLSYSLLSLAFFFTLKYLFQRSRKVRNLPPGPTPLPIIGNLNLVEQPIHRFFHRMSQKYGNIISLWFGSRLVVVVSSPTAYQECFTKHDVTLANRVRSLSGKYIFYDNTTVGSCSHGEHWRNLRRITSLDVLSTQRVHSFSGIRSDETKRLIHRLARDSGKDFARVEMTSKFADLTYNNIMRMISGKRFYGEESELNNVEEAKEFRDTVNEMLQLMGLANKGDHLPFLRWFDFQNVEKRLKNISKRYDTILNKILDENRNNKDRENSMIGHLLKLQETQPDYYTDQIIKGLALAMLFGGTDSSTGTLEWALSNLVNDPEVLQKARDELDAQVGPDRLLNESDLPKLPYLRKIVLETLRLYPPAPILIPHVASEDINIEGFNVPRDTIVIIN…
	Clan71	CYP81	Glyma.09G049200.1	MGMLLLLLSYSLLFLVLFLTLKSLFQRRKLRNLPPGPPPLPIIGNLNLLEQPIHRFFQRMSKEYGNIVSLWFGSRLAVVISSPTAYQECFTKHDVALANRLPSLSGKYIFYNNTTVGSCSHGEHWRNLRRITALDVLSTQRVHSFSGIRSDETKRLVQRLLAKNSKEGFARVEISSMFNDLTYNNIMRMISGKRFYGEESELKNVEKAREFRETVTEMLELMGVANKGDHLPFLRWFDFQNVEKRLKSISKRYDTILNEIIDENRSKKDRENSMIDHLLKLQETQPEYYTDQIIKGLALAMLFGGTDSSTGTLEWSLSNLLNYPEVLKKAKDELDTQVGQDRLLNESDLPKLPYLRKIILETLRLYPPAPILIPHVSSEDITIEGFNVPRDTIVIINGW…
	Clan71	CYP81	Glyma.09G049300.1	MGMLLLLLSYSLLFLVLFLTLKSLFQSRKLRNLPPGPPPLPIIGNLNLLEQPIHRFFQRMSKEYGNIVSLWFGSRLAVVISSPTAYQECFTKHDVALANRLPSLSGKYIFYNNTTVGSCSHGQHWRNLRRITALDVLSTQRVHSFSGIRSDETKRLVQRLLAKNSKEGFARVEISSMFNDLTYNNIMRMISGKRFYGEESELKNVEKAREFRETVTEMLELMGVANKGDHLPFLRWFDFQNVEKRLKSISKRYDTILNEIIDENRSKKDRENSMIDHLLKLQETQPEYYTDQIIKGLALAMLFGGTDSSTGTLEWSLSNLLNHPEVLKKAKEELDTQVGQDRLLNESDLPKLPYLRKIILETLRLYPPAPILIPHVSSEDITIEGFNVPRDTIVIINGW…
	Clan71	CYP81	Glyma.11G051800.1	MEGNLINILYLLIFLISLKLLFFRKRLKNPAPSPPSLPIIGNLHQLKKQPLHRALYDLSQKYGPNNILSLRFGSQPVLVVSSASAAEECFTKNDIIFANRFRSSLTKYIGFNHTIITASSYGDHWRNLRRISSLEILSNHRLNSFLGVRKDETMKLLRKLAKGSDKDFRRVELRPMFSELTFNIIIKMVCGKRYYGEEYDGTNAEEAKRFREIMNEISQFGLGSNLADFVPLFRLFSSRKKLRKVGEKLDAFFQGLIDEHRNKKESSNTMIGHLLSSQESQPEYYTDQTIKGLIMALYVAGTETSAVALEWAMSNLLNSPEVLEKARVELDTQVGQDRLIEEADVTKLQYLQNIISETLRLHPPLSMLLPHLSSEDCTVGSYDVPRNTMLMVNAWAIHR…
	Clan71	CYP81	Glyma.11G093100.1	MHRYTDLNQKNIRMEEEADYRLIVITASVGFLLLFLYVLKSILLKSKNLPPSPPYALPLIGHLHLIKEPLHLSLHKLTDKYGPIIFLCLGTRKVLVVSSPSAVEECFTKNDITFANRPQTLAAKHLNYNKTTIGVASYGHYWRNLRRLTTVELFSTTRLAMLTSVRVEEVQLMVKQLFEECKGRQQIMIDLRARLLEVSFNIMLRMISGKRYYGKHAIAQEGKEFQILMKEFVELLGSGNLNDFFPLLQWVDFGGVEKKMVKLMKKMDSFLQKLLDEHCTRRNVMSEEEKERRKSMTLIDVMLDLQQTEPEFYTHETVKGVILAMLVAGSETSATTMEWAFSLLLNHPKKMNKVKEEIDTYVGQDQMLNGLDTTKLKYLQNVITETLRLYPVAPLLLPH…
	Clan71	CYP81	Glyma.15G156100.1	MGMLLVVVSYAVLFLVLFLGVKFVFQSRKLRNIPPGPPPLPIIGNLNLLEQPIHRFFQRMSKQYGNVVSLWFGSRLAVVISSPTAYQECFTKHDVALANRLPSLSGKYIFYNNTTVGSCSHGEHWRNLRRITALDVLSTQRVHSFSGIRSDETKRLMQRLVLAKNSNEEEFARVEISSMFNDLTYNNIMRMISGKRFYGEESEMKNVEEAREFRETVTEMLELMGLANKGDHLPFLRWFDFQNVEKRLKSISKRYDSILNKILHENRASNDRQNSMIDHLLKLQETQPQYYTDQIIKGLALAMLFGGTDSSTGTLEWSLSNLLNHPEVLKKARDELDTQVGQDRLLNESDLPKLPYLRKIILETLRLYPPAPILIPHVSSEDITIEGFNIPRDTIVIIN…
	Clan71	CYP81	Glyma.16G149300.2	MKSWITSSQSKPNYPTKAPTWIYLSSYPLSHVFYKYIYIYIYIYMQVGLINYNQPNTTLHSQASSMTPFYFLLFAFILFLSINFLIQTRRFKNLPPGPFSFPIIGNLHQLKQPLHRTFHALSQKYGPIFSLWFGSRFVVVVSSPLAVQECFTKNDIVLANRPHFLTGKYIGYNNTTVAVSPYGDHWRNLRRIMALEVLSTHRINSFLENRRDEIMRLVQKLARDSRNGFTKVELKSRFSEMTFNTIMRMVSGKRYYGEDCDVSDVQEARQFREIIKELVTLGGANNPGDFLALLRWFDFDGLEKRLKRISKRTDAFLQGLIDQHRNGKHRANTMIDHLLAQQQSQPEYYTDQIIKGLALVMLLAGTDTSAVTLEWAMSNLLNHPEILKKAKNELDTHIG…
	Clan71	CYP82	Glyma.01G135200.1	MELVLHFLNTTTIGVVSLIFLLCLFLYGPLKKVHGSSKEAPTVGGAWPIFGHLPLLIGSKSPHKALGALAEKHGPLFTIKLGAKKALVVSDWEMARECFTTNDVAVSARPKLLVAELMCYNNAMLLVAPYGPYWRELRKIIVTEILSSSRVEQLQDVRVSEVQNSIVELYDVWRSQKNESDYASVELKQWFAQPIFNMVLRMVVGKRFLSATATDEKAEKCVKAVDEFMRLAGVFTVGDAIPYLRWLDFGGYEKAMKETAKELDVMISEWLEEHRQKRALGEGVDGAQDFMNVMLSSLDGKTIDGIDADTLIKSTVLTIIQAGTEASITTIIWAMCLILKNPLILEKIKAELDIQVGKDRCICESDISNLVYLQAVVKETFRLYAPGPLSSPREFAEDC…
	Clan71	CYP82	Glyma.01G181800.1	MVMVMDVFQLQTLVSGILALLVGALLYKLKKTHGPNAKICTAPQAGGAWPIVGHLHLFGAHQLTHKTLGTMADKHGPIFTIKLGSYKVLVLSSWEMAEECFTVHDKAFSTRPCVAASKLMTYNSAMFGFAPHGPYWREMRKFATIELLSNQRLELLKDIRTSELEAATTKAYKLWSREGCPKGGVLVDMKQWFGDLTHNIILRMVGGKPYYGAGDDYAEGEARRYKKTMRDFMRLFGVFVLSDAIPFLGWIDNNGYKKAMKKTASEIDTLVAGWLEEHKRKRATSTNGKEEQDVMGVMLNVLQDLKVSGYDSDTIIKATCLNLILAGGDSIMVALTWALSLLLNNEIELKKAQDELDTQIGKDRKVEESDIKKLAYLQAIVKETMRLYPPSPVITLRAA…
	Clan71	CYP82	Glyma.01G181900.1	MDAFQFKILISSILALLVCALFYQFKRTLCGNTKKICSAPQAAGAWPIIGHLHLFNGHQLTHKTLGMMAEKHGPIFTIKLGSYKVLVLSSWEMAKECFTVHDKAFSTRPCVAASKLMGYNYAMFGFTPYGSYWRQVRKLTTIELLSNNRLEPLKETRTFELDAAVKELYKLWTRNGCPKGGVLVDMKQWFGDLTHNIALRMVGGKSYCGVGDDHAEGEARRYRRVMRDWVCLFGVFVWSDSFPFLGWLDINGYEKDMKRTASELDTLVEGWLEEHKRKKKRGLSVNGKEEQDDFMDVMLNVLQGTEISGYDSDTIIKATCLNLILAGTDPTMVTLTWALSLLLNHQTELKRAQHELGTLMGKHRKVDESDIKKLVYLQAVVKETLRLYPPSPIITLRAA…
	Clan71	CYP82	Glyma.02G078800.1	MASPQTPLSLLTIALLSLIPLFIFFFFNRSKGKQPKEPPTIPGAWPILGHLPLLARSPTTHHLLGAIADDHGPLFTIKLGTVKALVVSNWETAKECFTTNDVAVSYRPYVVATEHMTYNVAMLGFAPYGPFWRDMRKNIASAFLSDHRIDTLSHVRVSEVRTSLKELYSKWTRGTDGGKSDFLAVEMKEWLKELSFNVVLRMVAGKRYFGDTAVVDEDEAQRCLKALREYMRLLGVFAVADAVPWLRWLDFKHEKAMKENFKELDVVVTEWLEEHKRKKDLNGGNSGDLIDVMLSMIGGTTIHGFDADTVIKATAMAMILGGTDTSSATNIWTLCLLLNNPHTLEKVKEEIDTHIGKERIVTEEDISKLVYLQAVLKESLRLYPATPLSGPREFREDCK…
	Clan71	CYP82	Glyma.04G035500.1	MGLTIQYLEASVAAIIGIILVSYFIKRATAGSARKPPAAGGGWPLIGHLHLLGGSTQPPYITLGSLADKYGPIFSMRIGVHHAVVVSSWELAKECFTTLDVVISSRPKFTAAKILGYNYANFGFTPYGDFWRVMRKIAASELLSTARFELLQRIRDSEMQISLKELYRTWVDKRGVSDDLLVEMKQWFGDVNLNVILRMISGKRYSAKSEDDLQQVRRIRRVFREFFRLTGLFVVGDAIPFLGWLDLGGEVKEMKKTAIEMDNIVSEWLEEHKQQITDSGDTKTEQDFIDVLLFVLKGVDLAGYDFDTVIKATCTMLIAGATDTTAVTMTWALSLLLNNHHALKKVKDELDEHVGKERLVNESDINKLVYLQAVVKETLRLYPAGPFSGPREFTENCTL…
	Clan71	CYP82	Glyma.04G035600.1	MDSSLQLTIIAILVSLLVFLWHTKRNRGGSKNKSKEAPIPAGAWPLIGHLHLLGGDDQLLYRTLGTMADQYGPAFNIWLGTRRAFVVSSWEVAKECFTSNDKALASRPTTVAAKHMGYNYAVFGFAPYSPFWREMRKIATLELLSNRRLEMLKHVMVSELNMVMRDLYNSWVQNRSRPVLVELNRWLEDLTLNMVVRMVAGKRYFGASASCDNDDEARRCQKAINQFFHLIGIFVVSDALPFLRWFDVQGHERAMKKTAKELDAILEGWLKEHREQRVDGEIKAEGEQDFIDIMLSLQKGGHLSNFQYDSDTSIKSTCLALILGGSDTTAGTVTWAISLLLNNRQALKKAQEELDLNVGMERQVEESDIRNLAYVQAIIKETLRLYPAGPLLGPREAQE…
	Clan71	CYP82	Glyma.06G035200.1	MDLQYPFLLSTPSFTIFFGLLLFLFVLSSIWRRSRTRTATTRKSPPEASGAWPLIGHLHLFGASKPPHVTLGNMADKYGPIFTLRLGVHKTLVVSNWEMAKQCFTVNDKAFASRPKSVAFEVLGYNFSMIGFSPYGSYWRHVRKIATLELLSSHRIDMIKHVMESEVKAAVKEIYDIWIDKNKSGSEKVTTEMKRWFGDIMLKVMFRTVVGKRFVLETEENERIRKAMRDLFDLSGSFSVSDALPYLRWFDLDGAEKKMKTTAKELDGFVEVWLQEHKRNRNNSGSGQEKGNHDFMDLLLNLVEEGQEFDGRDGDTTIKATCLALILAGMDTTAGTMTWALSLLLNNHGILNKVVHELDTHIGTEKMVKVSDLKKLEYLQSIIKETLRLYPVGPLSLPH…
	Clan71	CYP82	Glyma.06G035300.1	MIIHYQNQSYPTTSSDTMLHMENPLLQSTNSITFTFFGLLLFLFVLSSIFRNRGAATRKAPPEARGAWPLIGHIHLLGGSKPPHVTLGHMADKYGPVFTLRLGAHKTLVVSNWEMAKQCFTVNDKAFASRPKSVSFELLGYNYSMIGFIPYGSYWRHVRKIITLELLSTHCIDMLKHVMVAEVKAAVKETYKNLKGSEKATTEMKRWFGDITLNVMFRTVVGKRFVGENEENERIRKALREFFDLTGAFNVSDALPYLRWLDLDGAEKKMKKTAKELDGFVQVWLEEHKSKRNSEAEPKSNQDLMDVLLSLVEEGQEFDGQDADTTIKATCLGLILAGSDTTTTTLSWALSLLLNNREVLNKAIHELDTQIGSEKIVEISDLKKLEYLQSIIKETLRLY…
	Clan71	CYP82	Glyma.06G035400.1	MDAATGVGVCVFLLISYMAFLIKRATAGSARKPPAASGGWPLIGHLHLLGGSGQPLYETLGTLADMYGPIFSIRIGVHPAVVVSSWELAKECFTTLDVTVSSRPKFTAAKILTYNYASFAFAPYGDFWRDMHKITVSELLSTRQAEMLRGIRDSEVKSSLRELQRAWAEKRGVSSGDLLVEMKQWFGEMNLNVILRMVAGKRYCVGSVDQEQARRVRGVLRDFFHLMGSLVIGDAIPFLGWLDLGGEVKEMKKTAVEIDNIVSEWLEEHKQLRRDSSEAKTEQDFMGALLSALDGVDLAGYDADTVIKATCSTLIAAATDTTTVTMIWTLSLLLNNRHALNKVQDELDEHVGKGRLVNESDINKLIYLQAVVKETMRLYAAAPLPGPREFTSECTLGGY…
	Clan71	CYP82	Glyma.11G060100.1	MNLVLRRVMGMAMDAFQHQTLISIILAMLVGVLIYGLKRTHSGHGKICSAPQAGGAWPIIGHLHLFGGHQHTHKTLGIMAEKHGPIFTIKLGSYKVLVLSSWEMAKECFTVHDKAFSTRPCVAASKLMGYNYAMFGFTPYGPYWREIRKLTTIQLLSNHRLELLKNTRTSESEVAIRELYKLWSREGCPKGGVLVDMKQWFGDLTHNIVLRMVRGKPYYDGASDDYAEGEARRYKKVMRECVSLFGVFVLSDAIPFLGWLDINGYEKAMKRTASELDPLVEGWLEEHKRKRAFNMDAKEEQDNFMDVMLNVLKDAEISGYDSDTIIKATCLNLILAGSDTTMISLTWVLSLLLNHQMELKKVQDELDTYIGKDRKVEESDITKLVYLQAIVKETMRLYP…
	Clan71	CYP82	Glyma.11G060200.1	MDAFQFKTIISGILALLACALFYQFKKTLCGNTKKICRAPQAAGAWPIIGHLHLFNAHQLTHKTLGKMAEKHGPIFTIKLGSYKVLVLSSWEMAKECFTAHDKAFSTRPCVAASKLMGYNYAMFGFTPYGSYWRQVRKLTTIELLSNNRLEPLKDTRTVELDAAIRELYKVWTREGCPKGGVLVDMKQWFGDLTHNIALRMVGGKSYSGVGDDDHAEGEARRYRRVMRDWVCLFGVFVLSDSFPFLGWLDINGYEKDMKRTASELDALVEGWLEEHKRKRKRKRGLSVNGKEEQDDFMDVMLNVLQGTEISGYDSDTIIKATCLNLILAGTDPTMVTLTWALSLLLNHQMELKRARHELDTLIGKDRKVEESDIKKLVYLQAVVKETLRLYPPSPIITL…
	Clan71	CYP82	Glyma.13G068500.1	MILCIIAHLSRSRSYHKQSSQLSKMEFVLNYLNATAIGVLSLILFCMFLYNPFKIALGKQDAPTVAGAWPILGHLPLLSGSETPHRVLGALADKYGPIFTIKIGVKKALVISNWEIAKECFTTNDIVVSSRPKLVAIELMCYNQAMFGFAPYGPYWRQLRKIVNLEILSNRRVEQLQHVHVSEVQSSIKELFNVWSSKKNESGYALVELNQWFSHLTFNTVLRVVVGKRLFGATTMNDEEAQRCLKAVEEFMRLLGVFTVADAIPFLRWFDFGGHERAMKETAKDLDKIFGEWLEEHKRKRAFGENVDGIQDFMDVMLSLFDGKTIDGIHADTIIKSTLLSVISGGTETNTTTLTWAICLILRNPIVLENIKAELNFQVGKERCISESDVAKLAYLQAV…
	Clan71	CYP82	Glyma.13G068800.2	MDLLLNCLNLNTIAIASILSLIFLCLFLYRKNSRGKDAPVVSGAWPILGHLSLLNGSQTPHKVLGALADKYGPLFTIKLGMKPALVLSNWEMSKELFTTNDLAVSSRPKLVAVEVMSYNQAFVGLAPYGPYWRELRKIVTFEFLSNRRIEQRNHIRVSEVRTSIKELFDIWSNGNKNESRYTLVDIKQWLAYLTFNMVVRMVVGKRYFGVMHVEGKDKAQRFMKNIREFMNLMGTFTVADGVPCLRWLDLGGHEKAMKANAKEVDKLLSEWLEEHRQKKLLGENVESDRDFMDVMISALNGAQIGAFDADTICKATSLELILGGTDSTAVTLTWALSLLLRNPLALGKAKEEIDMQIGKDEYIRESDISKLVYLQAIVKETLRLYPPAPFSSPREFTEN…
	Clan71	CYP82	Glyma.13G068800.4	MDLLLNCLNLNTIAIASILSLIFLCLFLYRKNSRGKDAPVVSGAWPILGHLSLLNGSQTPHKVLGALADKYGPLFTIKLGMKPALVLSNWEMSKELFTTNDLAVSSRPKLVAVEVMSYNQAFVGLAPYGPYWRELRKIVTFEFLSNRRIEQRNHIRVSEVRTSIKELFDIWSNGNKNESRYTLVDIKQWLAYLTFNMVVRMVVGKRYFGVMHVEGKDKAQRFMKNIREFMNLMGTFTVADGVPCLRWLDLGGHEKAMKANAKEVDKLLSEWLEEHRQKKLLGENVESDRDFMDVMISALNGAQIGAFDADTICKATSLELILGGTDSTAVTLTWALSLLLRNPLALGKAKEEIDMQIGKDEYIRESDISKLVYLQAIVKETLRLYPPAPFSSPREFTEN…
	Clan71	CYP82	Glyma.13G285300.3	MELVLNSTTIGVGVVSLILLLYLFLRGGSWKSGEEGPPTVAGAWPIIGHLPLLLGSKTPHKTLGDLADKYGPIFSIKIGAKNAVVVSNWEMAKECYTTNDIAVSSLPDLISANLLCYNRSMIVVAPYGPYWRQLRKILMSEFLSPSRVEQLHHVRVSEVQSSITELFRDWRSNKNVQSGFATVELKQWFSLLVFNMILRMVCGKRYFSASTSDDEKANRCVKAVDEFVRLAATFTVGDAIPYLRWFDFGGYENDMRETGKELDEIIGEWLDEHRQKRKMGENVQDLMSVLLSLLEGKTIEGMNVDIVIKSFVLTVIQAGTEASITTLIWATSLILNNPSVLEKLKAELDIQVGKERYICESDLSKLTYLQAVVKETLRLYPPAPLSRPREFEEDCTIGG…
	Clan71	CYP82	Glyma.15G203500.1	MDLVLNTTTIGVGVVSLILLYLFLCRRSSKSGEEGPPTVAGAWPIIGHLPLLLGSKTPHKTLGDLADKYGPIFSIKLGAKNAVVISNWEMAKECYTTNDIAVSSLPNLISANLLCYNRSMILVAPYGPYWRQMRKILMSEFLSPSRVEQLHHVRVSEVQNSITDLFGAWRSNKNVESGCALVELKQWFSLLVFNMILRMVCGKRYFSATTSDDEKAKRCVKAVDEFVRLAATFTVGDTIPYLRWFDFGGYEKDMRETGKELDEIIGEWLEEHRQKRKMGENVQDFMNVLLSLLEGKTIEGMNVDIVIKSFVLTIIQAATEASITTLVWATSLILNNPSVLEKLKAELDIQVGKERYICESDLSKLTYLQAVVKETLRLYPPGPLSRPREFEEDCTIGGY…
	Clan71	CYP82	Glyma.16G089700.1	MCRYCGFSTLLMDPASYVQTIAGILALLIAYILFRSVKSPNGSKQRKGNQVPEPRGALPFIGHLHLLNARKPYFRTFSAIAEKYGPIFILKLGCHPTLVVNSREIAKECLTTNDKVFASRPITSAGKILGYNNAVFGFSPYGKYWREIRKMAILEILSSYKLEKLKHVRDTETLSLVKDLYSSISCPKNVNGSTTHVPISNLLEHMSFNIIVRMIAGKRFGGDTVNQEDNEAWRLRNAIKDATYLCGVFVAADAIPSLSWIDFQGYVSFMKRTNKEIDLILEKWLEEHLRKRGEEKDGKCESDFMDVMISAFQEEEEICGYKREMVIKATSVLLILTASGSTAITLTWALSLLLNHPKVLKAAQKELDTHLGKERWVQESDIENLTYLQAIIKETLRLY…
	Clan71	CYP82	Glyma.16G089900.1	MDPASYVQTIAGILALLIAYIVFRSIKSPNGSKQRKGNQVPEPRGALPFIGHVHLLNARKPYFRTFSAIAEKYGPIFILKLGCHPTLVVNSREIAKECLTTNDKVFASRPITSAGKILGYNNAVFGFSPYGKYWREIRKMATLEILSSYKLEKLKHVRDTETLSLVKDLYSSISYPKNVNGSTTHVPISNLLEHMSFNIIVRMIAGKRFGGDTVNQEDNEAWRLRNAIRDATYLCGVFVAADAIPSLSWIDFQGYVSFMKRTNKEIDLILEKWLEEHLRKRGEEKDGKCESDFMDVMISAFQEEEEICGYKREMVIKATSVLLILTASGSTAITLTWALSLLLNHPKVLKAAQKELDTHLGKERWVQESDIKNLTYLQAIIKETLRLYPPAPLTGIREV…
	Clan71	CYP82	Glyma.16G090000.1	MDFLPQPTLVVIVITIVLLYNIWRKKSSTIHKIKGLQPPEPSFALPLIGHLHLLGAKTPLARIFASLADKYGPIFQIHLGAYPALVICNQEAIKECFTTNDKVLASRPKSSHGVHLSYNFAGFGFAPYGSYWIKLRKLTMLELLSARRLEFLRPVYESEIDTLIRDLWMYLGGKSDVKVTISEWLERLTFNMITKMIAGKRYFSYLQDVDDVEAHGIVKLIKEFMHISGEFVLSDLIPLLGWLGVHGTVLKNMKRIAKDLDTLVGGWVEEHMKSDTLTNKSWEKHDFIDVMLSVIEDDSVSGHTRDTIIKANVMNLMLAGSDTTSTTMTWTLAMLMKNPHALKRAQEEIDHQVGRERRRVEARDIKDLIYLQAIVKETLRLYPPGPVLVPHEAREDCNI…
	Clan71	CYP82	Glyma.16G090000.2	MDFLPQPTLVVIVITIVLLYNIWRKKSSTIHKIKGLQPPEPSFALPLIGHLHLLGAKTPLARIFASLADKYGPIFQIHLGAYPALVICNQEAIKECFTTNDKVLASRPKSSHGVHLSYNFAGFGFAPYGSYWIKLRKLTMLELLSARRLEFLRPVYESEIDTLIRDLWMYLGGKSDVKVTISEWLERLTFNMITKMIAGKRYFSYLQDVDDVEAHGVHGTVLKNMKRIAKDLDTLVGGWVEEHMKSDTLTNKSWEKHDFIDVMLSVIEDDSVSGHTRDTIIKANVMNLMLAGSDTTSTTMTWTLAMLMKNPHALKRAQEEIDHQVGRERRRVEARDIKDLIYLQAIVKETLRLYPPGPVLVPHEAREDCNIQGYHVPKGTRVFANVWKLHRDPSLWSEP…
	Clan71	CYP82	Glyma.19G014600.1	MDLLLNCINLNSIAIASFICLIFVCLFLHSKNSRGKDAPVVAGAWPILGHLSWLNGSQAPHKMMGTLADKYGPLFTIKLGVKPALVLSNWEMSKELFTTNDLAVSSRPKLVAVEVMSYNQAFVGLAPYGPYWRELRKIVTFEFLSNRRIEQRSHIRVSEVRTSIRELFHVWSSGNKNESSYTLVDITQWFAYLTFNMVVRMVVGKRYFGVMHVEGKDKAERFMKNIREFMNLMGTFTVADGVPCLRWLDLGGYEKAMKGTAKEIDKLLSEWLEEHLQKKLLGEKVESDRDFMDVMISALNGSQIDGFDADTICKATTLELILGGTDTTAVTLTWALSLLLRNPLALGKAKEEIDMQIGKDEYIRESDISKLVYLQAIVKETLRLYPPAPFSSPREFTEN…
	Clan71	CYP82	Glyma.19G014700.1	MDFVLNYLNANTIGVLSLILFCLFLYHPFKFARGKKEAPTVAGAWPILGHLPLLNGSHIPHRALGDLADKYGPIFTIKLGVKKALVISNWEIAKECFTTNDIFVSSRPKLVAVEYMGYNQAMLGFAPYGPYWRELRKVATLEILSNRRVEQLQDVRVSEVQHSIKDLFNVWCSKKNESGYALVELKQWFYHLTFNMVLQMVVGKRYFSATTVDDQEMAQRCVKAVKEFMRLIGVFTVGDAIPFLRRFDFGGHEKAMKETGKELDNILGEWLEEHRQNRSLGESIDRDFMDVMISLLDGKTIQGIDADTIIKSTVLAVILGATDTTSTTLTWAICLMLRNPFALENVKAELDIQVGKERCITESDISKLTYLQAVVKETLRLYPAGPLSVPREFTENCTL…
	Clan71	CYP82	Glyma.19G015000.1	MDFILNYLNVTAIGFVSLILFCLFLYNPLKLAQRKKEAPTVSGAWPILGHLLLLSSSKAPHRVLGALADKYGPIFTIKLGAKKALVISNWEIAKECFTTNDIVVSSRPRLVAAENMGYNHAILGFSPYGPYWRELRKITTLEILTSRRVEQLQHVRVSEVQSSIKELFDVWRSKKNESGYALVDLKQWFSRLTFNMVLRMVVGKRYFGATTVDDDDVEKAQRCVNAIKDFMRLFGVFPVADAIPYLRCFDFGGHEKAMKETAKDLDSIISEWLEEHRQNRALDENVDRVQDFMDVMISLLDGKTIDGIDADTMIKSTVLTVIVGGADTTSTSLTWAMCLILKNPYVLEKVKAEFDIQVGKENCISESDISKLTYLQAMVKETLRLYPPGPLSGPREFTE…
	Clan71	CYP82	Glyma.19G015200.1	MIHSIIAHLCRSSHYSKQSSLFKMEFVLNYLNATAIGVLSITLFFLFLYNPFKFALGKKEAPKVAGAWPILGHLPLLSGSETPDRVLGALADKYGPIFTINYGVKKALVISNWEIAKECFTKNDIVVSSRPKLLAIELMCYNQAMFGFAPYGPYWREQRKITTLEILTSRRVEQLQHVRVSEVQSSIKELFNVWSSNKNNESGYALLELKQWFSQLTYNMVLRMVVGKRLFGARTMDDEKAQRCVEAVKEFMRLMGVFTVADAIPFLRWFDFGGYEKAMKETAKDLDEIFGEWLEEHKQNRAFGENNVDGIQDFVDAMLSLFDGKTIHGIDADTIIKSNLLTVISGGTESITNTLTWAVCLILRNPIVLEKVIAELDFQVGKERCITESDISKLTYLQA…
	Clan71	CYP82	Glyma.19G015300.1	MEFVLNYLNATAIGVLSLTLFFLFLYNPFKFALGKKEAPKVAGAWPILGHLPLLSGSETPDRVLGALADKYGPIFTINNGVKKVLVISNWEIAKECFTKNDIVVSSRPKLLGIELMCYNQAMFGFAPYGPYWRELRKIVNLEILSNRRVEQLENVRVSEVQSSIKELFNVWSSNKNNESGYALLELKQWFSQLTYNMVLRMVVGKRLFGARTMDDEKAQRCVEAVKEFMRLMGVFTVADAIPFLRWFDFGGYEKAMKETAKDLDEIFGEWLEEHKQNRAFGENNVDGIQDFMDVMLSLFDGKTIYGIDADTIIKSNLLTIISGGTESITTTLTWAVCLILRNPIVLEKVIAELDFQVGKERCITESDISKLTYLQAVVKETLRLYPPGPLSAPREFIED…
	Clan71	CYP83	Glyma.01G078300.1	MDQNMLPLFVLLAFPILLLFFRKRKTSKKPTFPPGPRGLPFIGNLYQLDGSTLCLKLYELSKKYGPIFSLQLGSRPALVVSSPKLAKEVMKTHDLEFCGRPSLISTMKFSYNGLDMAFSPYRDYWRHTRKISIIHFLSLKRVLMFSSIRKYEVTQLVKKITEHASCSKVTNLHELLTCLTSAVVCRTALGRRYEEEGIERSMFHGLLKEAQELTASTFYTDYIPLVGGVVDKLTGLMGRLEKMFKVLDGFYQNAIDEHLDPERKKLTDEQDIIDALLQLKNDRSFSMDLTPAHIKPLMMNIILAGTDTSAAAVVWAMTALMKSPIVMKKAQEEIRNIFGGKDFIEEDDIQKLPYVQAVIKETMRIYPPLPLLLQRETIKKCSIAGYEIPEKTLVYVNAW…
	Clan71	CYP83	Glyma.03G029900.1	MLSPLLLFLCLTLPLFLLSFFKYRKTFKNPPLPPGPRGLPIIGNLHQLDSPSLHEQLWHLSKKYGPLFSLQFGLRPAIVVSSPKLAKEVMKDNDLECCGRPKLLGQQKLTYNGLDMGFSSYDSYWREIRKICVVHVLSSKRVQSFTSIRHFEVKQMIKKISRHASSSKVTNLNEVLISLISTIVCRIVLGRRYEEEGSEGSRFHKLFNECEAMLGNFFVSDYIPFMGWIDKLRGLDARLERNFKEMDKFYQEAIDEHMNSKKKTPEEEDLVDVLLQLKENNTFPIDLTNDNIKAVLLNLLVGATGTTEVTTIWAMTELIKNPSIMKKVQEEIRGLSGKKDFLDEDDIQKFSYLRAVIKETLRLHLPAPLLIPRETNKKCMLDGYEIPAKTLLYVNAWAI…
	Clan71	CYP83	Glyma.03G030400.1	MWSPIVLLLCLIPPVFLLFFFQYRRTFKNSNLPPGPRGLPIIGNLHQLDSSNLHLQLWKLSKKYGPIFSLQLGLRPAIVISSSKVAKEALKTHDVEFSGRPKLLGQQKLSYNGKDISFSPNGSYWREMRKLCVVHVLSSRRVTSFSSIINCEVKQMIKKISRHASSLKVTNLNEVLISLTCAIICRIAFGRRYEDEGTERSRFQELLNECEAMLSIFFVSDYVPFLGWIDKLSGLQARLEKSFKELDKFSQEVIEEHMDPNRRTSKEEDIIDVLLQLKKQRSFSTDLTIDHIKAVFMDLLIAATDPTAATTVWAMTELVRHPRVMKKVQEEIRNLGGKKDFLEENDIQKFPYFKAVIKETLRLYPPVPLLLPKETNENCIIDGYEIAAKTLVYVNALAI…
	Clan71	CYP83	Glyma.03G030600.1	MVSPHLILYITLPMLLLFFYQYRRAFKNSTLPPGPRGLPIIGNLHQLNSSSLYLQLWQLSKKYGPLFSLQLGLRPAIVVSSHKLAREALKDNDLEFSGRPKLLGQQKLSYNGLEMIFSPYGEFWRQIRKICVVHVLSSRRVSRFSSIRNFEVKQMIKRISLHASSSKVTNLNEVLMSLTSTIICRIAFGRSYEDEETERSKFHGMLNECQAMWGTLFISDYIPFLGWIDKLRGLHARLERNFKELDEFYQEVIDEHMNPNRKTTKNEDITDVLLQLKMQRLYSIDLTNDHIKAVLMDMLVAATDTTSTTTVWAMVALLKNPRVMKKVQEEIRTLGGKKDFLDEDDIQKFPYFKAVIKETLRLYLPAPLLVQRETNEACIIDGYEIPAKTIVYVNAWAIH…
	Clan71	CYP83	Glyma.03G030800.1	MVSPHLILCITLPMLLLFFFQYRRAFKNSTLPPGPRGLPIIGNLHQLHSSSLYLQLWQLSKKYGPLFSLQLGLRPAIVVSSHKLAREALKDNDLEFSGRPKLLGQQKLSYNGLEMIFSPYGEFWREIRKICVVHVLSSRRVSRFSSIRNFEVKQMIKRISLHASSSKVTNLNEVLMSLTSTIICRIAFGRSYEDEETERSKFHGMLNECQAMWGTLFISDYIPFLGWIDKLRGLHARLERNFKELDEFYQEVIDEHMNPNRKTTKNEDITDVLLQLKKQRLYSIDLTNDHIKAVLMDMLVAATDTTAATTVWAMTALLKNPRVMKKVQEEIRTLGGKKDFLDEDDIQKFPYFKAVIKETLRLYLPAPLLAQRETNEACIIDGYEIPAKTIVYVNAWAIH…
	Clan71	CYP83	Glyma.03G030900.1	MVSPLLILCFSLPLLLFFFFQSRRTFKKPPLPPSGPIGLPIIGNLHQLDSSALYLQLWQLSKKYGPLFSLQLGLRPAIVVSSPKLAKEVLKDHDLECCGRPKLLSHQKLSYKGLEIAFSTYGDIWREIKKICVVHVLSSRRVPMFSSIRQFEVKQMIKKISEHASSSKVTNLNEVVMSLTSTIICRIAFGRSYEDEGTERSRFHGMLNECQAMWGTFFFSDYIPFLGWIDKLRGLHARLERIFKESDKLYQEVIDEHMDPNRKIPEYEDIVDVLLRLKKQGSLSIDLTNDHIKAVLMNMLVAATDTTAATTVWAMTALLKNPRVMKKVQEEIRTLGGKKDFLDEDDIQKFPYFKAVIKETLRLYLPAPLLVQRETNEACIIDGYEIPAKTIIYVNAWAI…
	Clan71	CYP83	Glyma.03G031000.1	MVTMLLPLVLCLTLPVFFLFFIQHLRAFKKPPLPPGPKGLPIIGNLHKLDNSILCMQLWHLSKKYGPIFSLQLGLRKTIVISSPKLAKEVLKNHDLEFSGRPKLLPQQKLSYNGSEIVFSPYNEYWREMRKICVAHIFSSKRVSSFSSIRKFEVKQMIKTISGHASSSGVTNLSELLISLSSTIICRVAFGRRYEDEGSERSRFHGLLNELQVLMGTFFISDFIPFTGWIDKLKGLHARLERNFKELDKFYQEVIDEHMDPNRQHAEEQDMVDVLLQLKNDRSLSIDLTYDHIKGVLMNILAAGTDTTAATSVWAMTALVKNPRVMKKVQEEVRNVGGTKDFLDEDDIQKLPYFKAMIKETLRLHLPGPLLVPRESTEECIVDGYRIPAKTIVYVNAWV…
	Clan71	CYP83	Glyma.03G031400.1	MIRFTAMLSTILLPLVLCLTLLVLLLFFIRNLRTFKNPPLPPGPKGLPIIGNLHQFDSSILYLQLWQLSKKYGPIFSLQLGLRPAIVVSSPKLAKEVLKNHDLEFSGRPKLLGQQKLSYNGSEIAFSPYNEYWRQIRKICVVHIFSSKRVSSFSSIRNCEVKQMIKKISGHASSSGVTNLNELLMSLSSTIMCRVAFGRRYEDEGSEKSRFHVLLNELQAMMSTFFVSDYIPFTGWIDKLKGLHARLERNFKEFDKFYQEVIDEHMDPNRQQMEEHDMVDVLLQLKNDRSLSIDLTYDHIKGVLMDILVAGTDTTAATSVWAMTALIKNPRVMKKVQEEIRNVGGTKDFLDEDDVQKLSYFKAMIKETFRLYPPATLLVPRESNEECIIHGYRIPAKTI…
	Clan71	CYP83	Glyma.11G168428.1	MLPLVYILIALPAVVLLLILFKANKNNPPRPPGPRGLPIIGNLHQLDASKLNLQLGQLSKTYGPLFSLRIGFKPALVVSSPKLAKEVLKDHDLDVCTRPPSLGPLKLTYNALELIFSPYNDHWREIRKICVVHFFSSKRISAFSHVRKSEAKRMLQIVSSHVDSSKTTNLTEVLMAVSSAIICRLAFGRKYDDDGAEKSRFHGLLNDSQAMLLSFFVSDYIPFLGWIDKLTGMVTRLEKTFEALDGFLQEVLDEHLDPNRVKVKQNEEKDLVDLLLELKKQGRLSIDLTDDQIKAIILDILIAGTDTTAATSVWVMTGLIKNPRAMGKAQEEIRNLSGNKELIEEEDVQKLVYLKAVIKETLRVYAPTPLVPREAIRSFTIEGYEIQPKTIVYVNGWSI…
	Clan71	CYP83	Glyma.17G255900.1	MGILVLLSLLSIVISIVLFITHTHKRNNTPRGPPGPPPLPLIGNLHQLHNSSPHLCLWQLAKLHGPLMSFRLGAVQTVVVSSARIAEQILKTHDLNFASRPLFVGPRKLSYDGLDMGFAPYGPYWREMKKLCIVHLFSAQRVRSFRPIRENEVAKMVRKLSEHEASGTVVNLTETLMSFTNSLICRIALGKSYGCEYEEVVVDEVLGNRRSRLQVLLNEAQALLSEFFFSDYFPPIGKWVDRVTGILSRLDKTFKELDACYERFIYDHMDSAKSGKKDNDNKEVKDIIDILLQLLDDRSFTFDLTLDHIKAVLMNIFIAGTDPSSATIVWAMNALLKNPNVMSKVQGEVRNLFGDKDFINEDDVESLPYLKAVVKETLRLFPPSPLLLPRVTMETCNIE…
	Clan71	CYP83	Glyma.18G100500.1	MDQNMLLFILLAFPILLLFFFRKHKTSKKQCLPPGPRGLPFIGNLYQFDSSTLCLKLYDLSKTYGPIFSLQLGSRPTLVISSPKLAKEVMNTHDLEFCGRPSLISSMKFSYNGLDMAFSPYRDYWRHTRKISIIHFLSLKRVLMFSSTRKYEVTQLVKKITEHASCSKVTNLHELLTCLTSAIVCRTALGRTYEGEGIETSMFHGLLKEAQDLISSTFYTDYIPFVGGVIDKLTGLMGRLENLFKVLDGFYQNVIDEHLDPERKKLTDEEDIIDALLQLKDDPSFSMDLTPAHIKPLMMNIILAGTDTSAAAVVWAMTALMKSPRVMKKAQEEIRNVFGEKDFIGEDDIQKLPYLKAVIKETMRMYPPLPLLIHRETIKKCSIEGYEIPEKTLVYVNAW…
	Clan71	CYP84	Glyma.01G169200.1	MANLDLDPFQTSILILVPIALLVALLSRTRRRAPYPPGPKGLPIIGNMLMMEQLTHRGLANLAKHYGGIFHLRMGFLHMVAISDPVAARQVLQVQDNIFSNRPATIAISYLTYDRADMAFAHYGPFWRQMRKLCVMKLFSRKRAESWQSVRDEVDAAVRAVASSVGKPVNIGELVFNLTKNIIYRAAFGSSSQEGQDEFIKILQEFSKLFGAFNIADFIPYLGCVDPQGLNSRLARARGALDSFIDKIIDEHVHKMKNDKSSEIVDGETDMVDELLAFYSEEAKLNNESDDLQNSIRLTKDNIKAIIMDVMFGGTETVASAIEWAMAELMRSPEDQKRVQQELADVVGLDRRAEESDFEKLTYLKCALKETLRLHPPIPLLLHETAEDATVGGYLVPKK…
	Clan71	CYP84	Glyma.11G074100.1	MDWQSMMGNLDPFQRTILILVPLTLLLLLLLSRTRPRPPYPPGPKGFPIIGNMFMMDQLTHRGLANLAKHYGGIFHLRMGFLHMVAISDPDAARQVLQVQDNIFSNRPATIAISYLTYDRADMAFAHYGPFWRQMRKLCVMKLFSRKRAESWQSVRDEVDSAVRAVANSVGKPVNIGELVFNLTKNIIYRAAFGSSSQEGQDDFIKILQEFSKLFGAFNIADFIPYLGRVDPQGLNSRLARARGALDSFIDKIIDEHVQKKNNYQSSEIGDGETDMVDELLAFYGEEAKLNNESDDNLQNSIRLTKDNIKAIIMDVMFGGTETVASAIEWVMSELMRSPEDQKRVQQELADVVGLDRRVEESDFEKLTYLKCALKETLRLHPPIPLLLHETAEDATVGG…
	Clan71	CYP84	Glyma.16G131200.1	MDLLLELKTALEPFRETLLFTIPLTLLLLGIVSRIRRKTAPYPPGPKGLPLIGNMNIMNQLTHKGLANLAKQYGGVLHLRIGFLHMVAISNAEAAREVLQVQDNIFSNRPATIAISYLTYDRADMAFAHYGPFWRQMRKICVMKLFSRKRAESWNTVRDEVDFIIRSVTNNLGSPVNVGELVFNLTKNIIYRAAFGSSSQEGQDEFISILQEFSKLFGAFNVADFVPFLGWVDPQGLNKRLVKARASLDSFIDKIIDEHVQKRRSGHDGDEESDMVDELLNFYSHEAKLNDESDELLNSISLTRDNIKAIIMDVMFGGTETVASGIEWAMAELMRSPDDLRRVQQELADVVGLDRRVEESDLEKLVYLKCAVKETLRLHPPIPLLLHETAEDAAVCGYH…
	Clan71	CYP89	Glyma.07G220300.2	MEAWFIILVTLCVCVLIRAILFSLHKKTITIPPGPPHIPIISSILWLRKSISELEAVVKTLHAKYGPIITLRIGTEPTIFIADHSLAHQALIQHGSLFANRPKDGGFKILTNNRHQINSSSYGATWRTLRRNLASQMLHPSRVKSFSGIRKEVLHTLLTRLKSDSESNKSIKVIDHFQYAMSCLLILMCFGEPLDEGKVREIELVLRKLLLHFQSFNILNFWPRVTRVLCRNLWEQLLRMQKEQDDALFPLIRARKQKRTNNVVVSYVDTLLELQLPEEKRNLSEGEISALCAEFINAGSDTTSMSLQWVMANLVKYPHVQERVVDEIRNVLGERVREEREVKEEDLQKLPYLKAVILEGLRRHPPGHFTLPHVVAEDVVFNDYLVPKNGTVNFMVGMI…
	Clan71	CYP89	Glyma.07G220400.1	MEAWFIIPVTLCVCMLTRAILFSHHKKTITIPPGPPHIPIISSILWLRKTFSELEAVVKTLHAKYGPIITLRIGTERTIFIADHSLAHQALIQHGSLFSDRPKARAALKILSSNQHNISSASYGVTWRTLRRNLASEMLHPSSVKSFSRTRKWVVHTLLTRLKSDSSQSNNPIKVIHHFQYAMFYLLVFMCFGERLDNGKVRDIERVLRQMLLRFGRFNILNFWPKVTMILLHKRWEELFRYRKEQEDVMVPIIRARKQKRAKEGVGLNDGVVVSYVDTLLDLQLPEEKRELSEEEMVTLCNEFMNAGTDTTSTALQWIMANLVKYPHMQEKVVEEIREIVGEREEREVKEEDLHKLSYLKAVILEGLRRHPPAHIVSHAVTEDVVFNDYLVPKNGTVN…
	Clan71	CYP89	Glyma.07G220500.1	METWFIILVSLSLCILIRAIFSLNKKTITTPPGPSNIPIITSILWLRKTFSELEPILRSLHAKYGPVITLRIGSHRAVFIADRSLAHQALIQNGSLFSDRPKALAVSKIISSNQHNISSASYGATWRTLRRNLASEMLHPSRVKSFSEIRKWVLHTLLTRLKSDSSQSNNSIKVIHHFQYAMFCLLVFMCFGEQLDDGKVRDIERVLRQMLLGFNRFNILNFWNRVTRVLFRKRWKEFLRFRKEQKDVFVPLIRARKQKRDKKGCDGFVVSYVDTLLDLELPEEKRKLSEEEMVSLCSEFMNAGTDTTSTALQWITANLVKYPHVQERVVEEIRNVLGESVREVKEEDLQKLPYLKAVILEGLRRHPPGHFVLPHAVTEDVVFNDYLVPKNGTVNFMVA…
	Clan71	CYP89	Glyma.12G013700.1	METLFIFTILCLCLSVILKAICNVLFSPFPPGPPKCSFRLLRQYLTDPKTILQKLHAKYGSIFAVHFGYSHADIFIANRFLAHQALIQHGTVFADRPKANPTNKIISSNQHDILFSFYGPKWRLLRRNLTSRILHPSQVKSYAHARKWVLDMLLQNLKSDSDASNPIRVIDHFQYGMFCLLVLMCFGDKLDEKQIREIEDSQRDMLVSFARYSVLNLWPSITRILFWKRWKEFLQKRRDQEAVLIPHINARKKAKEERFGNSSSEFVLSYVDTLLDLQMLEDEVGIKLDDGKICTLCSEFLNAGSDTTSTALEWIMANLVKNPEIQERVVEEIRVVMVRREKDNQVKEEDLHKLPYLKAVILEGLRRHPPLHFVAPHRVTKDVVLDGYLVPTYASVNFL…
	Clan71	CYP89	Glyma.20G018600.1	MEAWFIVIVSLCVCVLIRAIFSLFHNKTITTPPGPPNIPVITSFLWLRKTFSELEPILRNLHTKYGPIVTLPIGSHRVIFIADRTLAHQALIQNGSLFSDRPKALAIGKILSCNQHNINSASYGPTWRTLRRNLASEMLHPSRAKSFSEIRKWVLHTLLTRLKSDSQSNDSIKIIDHFQYAMFCLLVFMCFGERLDDGKVRDIERVLRQLLLGMNRFNILNFWNPVMRVLFRNRWEELMRFRKEKDDVFVPLIRARKQKRAKDDVVVSYVDTLLDLELPEEKRKLSEMEMVTLCSEFMNAGTDTTSTALQWIMANLVKYPHVQEKVVDEIRSVLGERVREENEVKEEDLQKLPYLKAVILEGLRRHPPGHFVLPHAVTEDVVFNDYLVPKNGTVNFMVA…
	Clan71	CYP89	Glyma.20G018800.1	MEEAWFIILVSLCVCVLIRVILLFFLHKKTLATPPGPPHIPIITSFLWLKKSFIELEPFLRTLAAKHGPIFTLRIGSRPVIFIANRALAHQALIQNGSIFSDRPKALPAAKIVSSNQHNINSAPYGATWRALRRNLASEMLHPSRVMSFSGTRKWVLHTLLTRLKSDSQSNDSIKVINHFQYSMFCLLVFMCFGERLDDGKVRDIERVQRQMLLRFRRFNVLNFWPRVTRVLFFKLWEELLRVRKEQEDVLVPLIRARKQRRGTEGGGLRDDDGFVVSYVDTLLDLELPEEKRKLNEEELVTLCSEFLNAGTDTTSTALQWIMANLVKYPHVQERVVEEIKEVVGERVREEREVKEEDLQKLPYLKAVILEGLRRHPPGHFVLPHAVTEDVVFNDYLVP…
	Clan71	CYP89	Glyma.20G018900.1	MESWFIILVSLSVCVFIRTIFFSLHNKTITTPPGPTHIPIISNILWLRKTLKLEPILRTLHAKYGPMVTLRIGSRPAIFIADRTLAHQALIQNGSFFSDRPKGLATGKILNSNQHSISSASYGPTWRALRRNLASEMLHPSRARSFSGIRKWVLHTLLTRLKSDSQSNYSVKVVNHFQYAMFCLLVFMCFGERLDDGIVRDIERVQRQMLLRLSRFNVLNFWPRVTRVLCRKRWEELLRFRKEQEDVLVPLIRAKKEKRDKDNEGSLNDDVVVSYVDTLLDLQLPEEKRKLNEGELVTLCNEFLNAGTDTTSTALQWIMANLVKYPHVQEKVVDEIREVVGEREEREVKEEDLQKLPYLKAVILEGLRRHPPGHFVLPHAVTEDVILKDYLVPKNGTVN…
	Clan71	CYP92	Glyma.07G039800.1	MATELASSPNWVPSAATCLAAFAALLLLFLRGLRRRRYNLPPGPKPWPIIGNLNLIGSLPHRSIHTLSKKYGPIMHVWFGSSSVVVGSSVEIAKAVLKTHDATLAGRPKFAAGKYTTYNYSDITWSQYGPYWRQARRMCLMELFSAKRLQEYEYIRKQELRCLLNELFNSANKTILLKDHLSSLSLNVISRMVLGKKYLEESQNAVVSPDEFKKMLDELFLLNGVYNIGDFIPWIDFLDLQGYIKRMKTLSKKFDMFMEHVLDEHIERKKGIKDYVAKDMVDVLLQLAEDPTLEVKLERHGVKAFTQDLIAGGTESSAVTVEWAISELLRRPEIFKKATEELDRVIGRERWVEEKDIVNLPYVNAIVKEAMRLHPVAPMLVPRLAREDCNLGGYDIPKG…
	Clan71	CYP92	Glyma.16G008600.1	MAIELASPNWVPTAAACLAALAALLLFLLRGLRRRKYNLPPGPKPWPIIGNLNLIGSLPHQSIHALSKTYGPIMHVWFGSNPVVVGSSVDMAKAILKTHDATLAGRPKFAAGKYTTYNYSDITWSQYGPYWRQARRMCLMELFSAKRLEEYEYIRKQELRGLLNELFNSANKTILLKDHLSNLSLNVISRMVLGKKYLEESENAVVSPDDFKKMLDELFLLNGVYNIGDFIPWMDFLDLQGYIKRMKALSKKFDMFMEHVLDEHIERKKGVEDYVAKDMVDVLLQLAEDPTLEVKLERHGVKAFTQDLIAGGTESSAVTVEWAITELLRRPEIFKKATEELDRVIGRERWVEEKDIVNLPYVNAIAKEAMRLHPVAPMLVPRLAREDCQVGGYDIPKGT…
	Clan71	CYP92	Glyma.16G008600.2	MIHHHDTSLAFFFTSNLPISKMAIELASPNWVPTAAACLAALAALLLFLLRGLRRRKYNLPPGPKPWPIIGNLNLIGSLPHQSIHALSKTYGPIMHVWFGSNPVVVGSSVDMAKAILKTHDATLAGRPKFAAGKYTTYNYSDITWSQYGPYWRQARRMCLMELFSAKRLEEYEYIRKQELRGLLNELFNSANKTILLKDHLSNLSLNVISRMVLGKKYLEESENAVVSPDDFKKMLDELFLLNGVYNIGDFIPWMDFLDLQGYIKRMKALSKKFDMFMEHVLDEHIERKKGVEDYVAKDMVDVLLQLAEDPTLEVKLERHGVKAFTQDLIAGGTESSAVTVEWAITELLRRPEIFKKATEELDRVIGRERWVEEKDIVNLPYVNAIAKEAMRLHPVAPM…
	Clan71	CYP93	Glyma.02G176200.1	MMNDIQGYVPILLVWLASIILLQAIFKTSKFRLPPSPFALPIIGHFHLLKLPLHRSFQKLSNRYGPLIHIYIGSTLTVVVSSSEIAKEIFKTHDLSFSNRPANVAINYLTYNSSDFGFAPYGPYWKFMKKLCMSELLNGKMLDQLLPVRQEEIHRFLLMMKLKGEACEVVNVGDEFLKLTNSIVMRMAIGKSCFRNDDEAHKVTERIKESSKVSGMFNLEDYFWFCRGLDLQGIGKKLKVVHERFDTMMECIIREHEEARNKSTEKDAPKDVLDALLSISEDQNSEVKITRDNIKAFLVDMFTGGTDTTAVTLEWSLAELINHPTVMEKARKEIDSIIGKDRMVMEIDIDNLPYLQAIVKETLRLHPPSPFVLRESTRNCTIAGYDIPAKTQVFTNVWA…
	Clan71	CYP93	Glyma.03G142000.1	MADYQGTIILFIIWLVSTIVVRAIVSKKQNKTNRPPSPLALPIIGHLHLLAPIPHQALHKLSTRHGPIMHLLLGSVPCVVASTPEAAKEFLKTHENSFSNRPQSFAVDYLTYGSQDFSFAPYGPYWKFMKKICMSELLGGHTLSQLLPVRRQETLRFLRLMLQRGKAAEAIDVGRELLRLSNNVVSRMIMSQTCSEDDSEAEEVRKLVQDTVHLTGKFNVSDFIWFLRKWDLQGFGKGLKEIRDRFDAIMERAIKKHEEERKKRREEGSGGEGHIKDLLDVLLDIHEDENSDIKLTKENIKAFILDVFMAGTDTAALTTEWALAELINHPHVMERARQEIDAVIGNGRIVEESDIANLSYLQAVVKETLRIHPTGPMIIRESSESSTIWGYEIPAKTQL…
	Clan71	CYP93	Glyma.03G142100.1	MAFQVLFICLISTIVFASILWRKQNKNKTLLPPSPMPLPIIGHLHLLSPTPHQDFHKLSLRYGPIIHLFLGSVPCVVASTAEAAKEFLKTHEPAFSNRPANTVAVETLTYGFQDFLFAPYGPYWKFMKKLCMSELLGGHMLDQFLPVRQQETKKFIKRVLQKGISGEAVDFGGEFITLSNNIVSRMIVSQTSTTEDENEVEEMRKLVKDAAELSGKFNISDFVSFLKRFDLQGFNKRLEKIRDCFDTVLDRIIKQREEERRNKNETVGKREFKDMLDVLFDISEDESSEIKLNKENIKAFILDILIAGTDTSAVTMEWAMAELINNPGVLEKARQEMDAVVGKSRIVEESDIANLPYLQGIVRETLRLHPAGPLLFRESSRRAVVCGYDIPAKTRLFVN…
	Clan71	CYP93	Glyma.03G143700.1	MAYQVLLICLVSTIVFAYILWRKQSKKNLPPSPKALPIIGHLHLVSPIPHQDFYKLSTRHGPIMQLFLGSVPCVVASTAEAAKEFLKTHEINFSNRPGQNVAVKGLAYDSQDFLFAFAPFGPYWKFMKKLCMSELLSGRMMDQFLPVRQQETKRFISRVFRKGVAGEAVDFGDELMTLSNNIVSRMTLSQKTSENDNQAEEMKKLVSNIAELMGKFNVSDFIWYLKPFDLQGFNRKIKETRDRFDVVVDGIIKQRQEERRKNKETGTAKQFKDMLDVLLDMHEDENAEIKLDKKNIKAFIMDIFVAGTDTSAVSIEWAMAELINNPDVLEKARQEIDAVVGKSRMVEESDIANLPYLQAIVRETLRLHPGGPLVVRESSKSAVVCGYDIPAKTRLFVNV…
	Clan71	CYP93	Glyma.07G202300.1	MLLELALGLFVLALFLHLRPTPSAKSKALRHLPNPPSPKPRLPFIGHLHLLKDKLLHYALIDLSKKHGPLFSLSFGSMPTVVASTPELFKLFLQTHEATSFNTRFQTSAIRRLTYDNSVAMVPFGPYWKFVRKLIMNDLLNATTVNKLRPLRTQQIRKFLRVMAQSAEAQKPLDVTEELLKWTNSTISMMMLGEAEEIRDIAREVLKIFGEYSLTDFIWPLKYLKVGKYEKRIDDILNKFDPVVERVIKKRREIVRRRKNGEVVEGEASGVFLDTLLEFAEDETMEIKITKEQIKGLVVDFFSAGTDSTAVATEWALAELINNPRVLQKAREEVYSVVGKDRLVDEVDTQNLPYIRAIVKETFRMHPPLPVVKRKCTEECEINGYVIPEGALVLFNVWQ…
	Clan71	CYP93	Glyma.08G350800.1	MLDIKGYLVLFFLWFISTILIRSIFKKPQRLRLPPGPPISIPLLGHAPYLRSLLHQALYKLSLRYGPLIHVMIGSKHVVVASSAETAKQILKTSEEAFCNRPLMIASESLTYGAADYFFIPYGTYWRFLKKLCMTELLSGKTLEHFVRIRESEVEAFLKRMMEISGNGNYEVVMRKELITHTNNIITRMIMGKKSNAENDEVARLRKVVREVGELLGAFNLGDVIGFMRPLDLQGFGKKNMETHHKVDAMMEKVLREHEEARAKEDADSDRKKDLFDILLNLIEADGADNKLTRESAKAFALDMFIAGTNGPASVLEWSLAELVRNPHVFKKAREEIESVVGKERLVKESDIPNLPYLQAVLKETLRLHPPTPIFAREAMRTCQVEGYDIPENSTILIS…
	Clan71	CYP93	Glyma.08G350800.2	MLDIKGYLVLFFLWFISTILIRSIFKKPQRLRLPPGPPISIPLLGHAPYLRSLLHQALYKLSLRYGPLIHVMIGSKHVVVASSAETAKQILKTSEEAFCNRPLMIASESLTYGAADYFFIPYGTYWRFLKKLCMTELLSGKTLEHFVRIRESEVEAFLKRMMEISGNGNYEVVMRKELITHTNNIITRMIMGKKSNAENDEVARLRKVVREHEEARAKEDADSDRKKDLFDILLNLIEADGADNKLTRESAKAFALDMFIAGTNGPASVLEWSLAELVRNPHVFKKAREEIESVVGKERLVKESDIPNLPYLQAVLKETLRLHPPTPIFAREAMRTCQVEGYDIPENSTILISTWAIGRDPNYWDDALEYKPERFLFSDDPGKSKIDVRGQYYQLLPFG…
	Clan71	CYP93	Glyma.10G092500.1	MAETDIQDYLQLFFLWLLSIIAVRAILTKLRHKPRRPPGPRSLPIIGHLHLISALPHQSFHALSTRYGPAVQVFLGSVPAVVVSCPELAKEFLKTHEPSFSNRFVSAAVHHLSYGSKGFLFAPYGSYWRFLKKICMSELLGGRTLDQFRHLREQETLRFLRVLRAKGEAHEAVDVSGELMTLTNSVISRMVLSRTCCESDGDVEHVRKMVADTAELAGKFNVADFVWLCKGLDLHGIKKRLVGILERFDGMMERVIREHEEERERRKERGEGEEIRDLLDILLEIHQDESREIKLSRENVKAFILDIYMAGTDTSAITMEWALAELINNHHVMEKARQEIDSVTGNQRLIQESDLPNLPYLQAIVKETLRIHPTAPLLGRESSESCNVCGYDIPAKSLV…
	Clan71	CYP93	Glyma.10G092600.1	MADFGDYFGLLFIWLASIFILRVILFTKSRIKSRLPPSPRALPVLGHLYLLTKLPHQAFHNISIRYGPLVYLLFGSKPCVLVSSPEMARQCLKTHETCFLNRPKRTNLDYITYGSSDFVLAPYGPYWSFMKRLCMTELLGGRMLHQHLPIREEETKLFFKSMMKKACFGEEVNIGKELAMLANNIITRMALGRRCCDDVEGEGDQLIELVKEMTELGGKFNLGDMLWFVKRLDLQGFGKRLESVRSRYDAIMEKIMKEHEDARKKEMGGDEAVRDLLDILLDIYNDESSEIGLTRENIKAFIMNMFGAGTETSATTIEWALAELINHPDIMLKARQEIDSVVGKNRLVEESDILNLPYVQSIVKETMRLHPTGPLIVRQSTEDCNVNGYDIPAMTTLFV…
	Clan71	CYP93	Glyma.12G067000.1	MISESLLLVFLIVFISASLLKLLFVRENKPKAHLKNPPSPPAIPIIGHLHLLKPLIHHSFRDLSLRYGPLLSLRIGSVKFIVASTPSLAQEFLKTNELTYSSRKMNMAINMVTYHNATFAFAPYDTYWKFMKKLSTTELLGNKTLGHFLPIRTREVHDIIQFLFHKSKAQESVNLTEALLSLSNNVISQMMLSIKSSGTDSQAEQARTLVREVTQIFGEFNVSDFLGFCKNLDLQGFRKRALDIHKRYDALLEKIISDREELRRKSKVDGCEDGDDEKVKDFLDILLDVAEQKECEVQLTRNHVKSLILDYFTAATDTTAISVEWTIAELFNNPKVLKKAQEEVDRVTGNTQLVCEADIPNLPYIHAIIKETMRLHPPIPMIMRKGIEDCVVNGNMIPK…
	Clan71	CYP93	Glyma.12G067100.1	MISESLLLVFLIVFISASLLKLLFVRKNKPKAHLKYPPSPPAIPIIGHLHLLKPLIHHSFRDLCLRYGPLLSLRIGSVKFIVASTPSLAKEFLKTNELTYSSRKMNMAINTVTYHNATFAFAPYDTYWKFMKKLSTTELLGNKTLGHFLPIRTQEVHDFIQILFHKSKAQESVNLTEALLRLSNNVISRMMLSIKSSGTDSQAEQARALVREVTRIFGEFNVSDFLGFCKNMDLQSFRKRALDIHKRYDALLEKIISDREELRRKSKEEGCEDGGDEKVKDFLDILLDVSEQKECEVQLTRNHVKSLILDYFTAATDTTAISVEWTIAELFNNPKVLKKAQEEVEKVTGNKRLVCEADISNLPYIHAIIKETMRLHPPIPMITRKGIEDCVVNGNMIPK…
	Clan71	CYP93	Glyma.13G173401.1	MLLELALGLLVLALFLHLRPTPTAKSKALRHLPNPPSPKPRLPFIGHLHLLKDKLLHYALIDLSKKHGPLFSLYFGSMPTVVASTPELFKLFLQTHEATSFNTRFQTSAIRRLTYDSSVAMVPFGPYWKFVRKLIMNDLLNATTVNKLRPLRTQQIRKFLRVMAQGAEAQKPLDLTEELLKWTNSTISMMMLGEAEEIRDIAREVLKIFGEYSLTDFIWPLKHLKVGKYEKRIDDILNKFDPVVERVIKKRREIVRRRKNGEVVEGEVSGVFLDTLLEFAEDETMEIKITKDHIKGLVVDFFSAGTDSTAVATEWALAELINNPKVLEKAREEVYSVVGKDRLVDEVDTQNLPYIRAIVKETFRMHPPLPVVKRKCTEECEINGYVIPEGALILFNVWQ…
	Clan71	CYP93	Glyma.13G173500.1	MLLELALGLLVLALFLHLRPTPTAKSKALRHLPNPPSPKPRLPFIGHLHLLKDKLLHYALIDLSKKHGPLFSLYFGSMPTVVASTPELFKLFLQTHEATSFNTRFQTSAIRRLTYDSSVAMVPFGPYWKFVRKLIMNDLLNATTVNKLRPLRTQQIRKFLRVMAQGAEAQKPLDLTEELLKWTNSTISMMMLGEAEEIRDIAREVLKIFGEYSLTDFIWPLKHLKVGKYEKRIDDILNKFDPVVERVIKKRREIVRRRKNGEVVEGEVSGVFLDTLLEFAEDETMEIKITKDHIKGLVVDFFSAGTDSTAVATEWALAELINNPKVLEKAREEVYSVVGKDRLVDEVDTQNLPYIRAIVKETFRMHPPLPVVKRKCTEECEINGYVIPEGALILFNVWQ…
	Clan71	CYP93	Glyma.19G144700.1	MAYQVLVICVVSSIVFAYIVWRKERKKKLPPSPKGLPIIGHLHLVSPIPHQDFYKLSLRHGPIMQLFLGSVPCVVASTAEAAKEFLKTHEINFSNRPGQNVAVQFLTYVFGPYGPSVKFIKKLCMSELLGGRMLDQFLPVRQQETKKFIKRVLQKGIAGEAVDFGGEFMRLSNNIISRMTMNQTSSEDEKQAEEMRMLVADVAELMGTFNVSDFIWFLKPFDLQGFNKRIRKTRIRFDAVLDRIIKQREEERRNNKEIGGTRQFKDILDVLLDIGEDDSSEIKLTKENIKAFIMDIFVAGTDTSAATMEWAMAELINNPCVLEKARQEIDAVVGNSRIIEESDIVNLPYLQAIVRETLRIHPGGPLIVRESSKSVVVCGYEIPAKTRLFVNVWAIGRDP…
	Clan71	CYP93	Glyma.19G146800.1	MAYQVLVICVVSSIVFAYIVWRKERKKKLPPSPKGLPIIGHLHLVSPIPHQDFYKLSLRHGPIMQLFLGSVPCVVASTAEAAKEFLKTHEINFSNRPGQNVAVKGLAYDSQDFLFAFAPFGPYWKFMKKLCMSELLSGRMMDQFLPVRQQETKRFISRVFRKGVAGEPVDFGDELMTLSNNVVSRMTLSQKTSDNDNQAEEMKKLVSDIAELMGKFNVSDFIWYLKPFDLQGFNKKIKETRDRFDVVVDGIIKQREEERMKNKETGTARQFKDMLDVLLDMHEDKNAEIKLDKKNIKAFIMDIFVAGTDTSAVSIEWAMAELINNPHVLEKARQEIDAVVGKSRMVEESDIANLPYLQAIVRETLRLHPGGPLIVRESSKSAVVCGYDIPAKTRLFVNV…
	Clan71	CYP98	Glyma.03G122000.1	MALLLIVPISLVTLWLGYTLYQRLRFKLPPGPRPWPVVGNLYDIKPVRFRCFAEWAQSYGPIISVWFGSTLNVIVSNSELAKEVLKEHDQQLADRHRSRSAAKFSRDGKDLIWADYGPHYVKVRKVCTLELFTPKRLESLRPIREDEVTTMVESVYNHCTTTGNLGKAILVRKHLGSVAFNNITRLAFGKRFVNSEGVMDEQGVEFKAIVENGLKLGASLAMAEHIPWLRWMFPLEEGAFAKHGARRDRLTRAIMTEHTEARKKSGGAKQHFVDALLTLQDKYDLSEDTIIGLLWDMITAGMDTTAISVEWAMAELIRNPRVQQKVQEELDRVIGLERVMTEADFSSLPYLQCVIKEAMRLHPPTPLMLPHRANANVKVGGYDIPKGSNVHVNVWAVAR…
	Clan71	CYP98	Glyma.19G126000.1	MALLLIIPISLVTLWLGYTLYQRLRFKLPPGPRPWPVVGNLYDIKPVRFRCFAEWAQSYGPIISVWFGSTLNVIVSNSELAKEVLKEHDQLLADRHRSRSAAKFSRDGKDLIWADYGPHYVKVRKVCTLELFSPKRLEALRPIREDEVTSMVDSVYNHCTSTENLGKGILLRKHLGVVAFNNITRLAFGKRFVNSEGVMDEQGVEFKAIVENGLKLGASLAMAEHIPWLRWMFPLEEGAFAKHGARRDRLTRAIMAEHTEARKKSGGAKQHFVDALLTLQDKYDLSEDTIIGLLWDMITAGMDTTAISVEWAMAELIRNPRVQQKVQEELDRVIGLERVMTEADFSNLPYLQCVTKEAMRLHPPTPLMLPHRANANVKVGGYDIPKGSNVHVNVWAVAR…
Non-A-type	Clan51	CYP51	Glyma.03G115300.1	MEIDGRFLNTGLLLVATILVAKLISAFIVPKSRKRVPPIVKGWPLIGGLIRFLKGPIFMLREEYPKLGSVFTLKLFHKNITFLVGPEVSAYFFKASETDLSQQEVYQFNVPSFGPGVVFDVDYSVRQEQFRFFTEALRVNKLKGYVNQMVAEAEDYFSKWGPSGEVDLKYELEHLIILTASRCLLGREVRDKLFDDVSALFHDLDNGMLPISVLFPYLPIPAHKRRDQARKKLAEIFASIITSRKSASKSEEDMLQCFIDSKYKDGRSTTEAEVTGLLIAALFAGQHTSSITSTWTGAYLLSDNQCLSAVQEEQKMLIEKHGDRVDHDVLAEMDVLYRCIKEALRLHPPLIMLMRSSHTDFSVTTREGKEYDIPKGHIIATSPAFANRLGHVFKDPDRY…
	Clan51	CYP51	Glyma.07G110900.1	MEVDSRFLNTGLLLVATILVVKLISAFIVPKSRKRVPPIVKGWPLIGGLIRFLKGPIFMLRDEYPKLGSVFTLKLFHKNITFLIGPEVSAHFFKASETDLSQQEVYQFNVPTFGPGVVFDVDYSVRQEQFRFFTEALRANKLKGYVNQMVAEAEDYFSKWGPSGEVDLKYELEHLIILTASRCLLGREVRDKLFDDVSALFHDLDNGMLPISVLFPYLPIPAHKRRDQARKKLAEIFASIITSRKSASKSEEDMLQCFIDSKYKDGRSTTEAEVTGLLIAALFAGQHTSSITSTWTGAYLLSNNQYLSAVQEEQKMLIEKHGDRVDHDVLAEMDVLYRCIKEALRLHPPLIMLMRSSHTDFSVTTREGKEYDIPKGHIIATSPAFANRLGHVFKDPDRY…
	Clan710	CYP710	Glyma.13G217400.1	MRPLSLSLTELTSYVLCFIILLLLLEQISYILKKASIPGPSFVLPFIGNAIPLVRDPTNFWDLQSSFAKSTPSGFSANYIIGNFIVFIRDSHLSHKIFSNVRPDAFHLVGHPFGKKLFGQHNLIYMTGQVHKDLRRRIAPNFTPKALSTYTALQQIIILNHLKSWLNQSQAPDSHSIPLRILARDMNLQTSQTVFVGPYLGPKARERFERDYFLFNVGLMKLPFDFPGTAFRNARLAVDRLIAALGTCTEMSKARMKAGGEPSCLVDYWMQDTLREIEEAKLAGEMPPPFSTDVEIGGYLFDFLFAAQDASTSSLLWAVALLDSHPEVLAKVRTEVAGIWSPESDELITADMLREMKYTLAVAREVLRFRPPATLVPHIAAESFPLTESYTIPKGAIVF…
	Clan710	CYP710	Glyma.15G095000.1	MKALTLASLLASFSFTELTSYLACFILLLLLLEQISYIVKKGSIPGPSLVLPFLGNAIPLVRNPTKFWDLQSSFAKSTPLGFSANYIIGNFIVFIRDSELSHKIFSNVRPDAFRLVGHPFGKKLFGEHNLIYMTGQDHKNLRRRIAPNFTPKALSTYTSLQQIIILNHLKSWVSQAQAQGSYSIPLRILARDMNLETSQTVFVGPYLGLKARERFERDYFLFNVGLMKLPFDFPGTAFRNARLAVDRLVVALGTCTEMSKTRMRTLGEEPSCLIDYWMQDTLREIEEAKLAGETPPPFSTDAEIGGYLFDFLFAAQDASTSSLLWAVALLESHPEVLAKVRAEVAGIWSPESDELITADMLREMKYTQAVAREVVRFRPPATLVPHVAAERFPLTESYT…
	Clan711	CYP711	Glyma.04G052100.3	MVVFMDYLEWLFAIPSVPSASAMFTLLALIGGLLVYLYAPYWGLRKVPGPPSLPLVGHLPLLAKYGPDVFSVLAKQYGPIYRFHMGRQPLIIIADAELCKEAGIKKFKDISNRSIPSPISASPLHQKGLFFSRDSQWSTMRNTILSMYQPSYLSRLVPTMQSFIESATQNLDSQKEDIIFSNLSLRLATDVIGHAAFGVNFGLSRPHSVCDSIKSVNVNNNNNNASASSSSNDNEVSDFIDQHIYSTTQLKMDLSGSLSIILGLLLPILQEPFRQILKRIPGTMDWKIERTNQKLSGRLDEIVEKRMKDKARSSKDFLSLILNARETKAVSENVFTPDYISAVTYEHLLAGSATTSFTLSSVVYLVAGHPEVEKKLLHEIDGFGPVDQIPTSQDLHNKF…
	Clan711	CYP711	Glyma.06G052700.1	MVFMDYLEWLLPIPSVPSASAMFTLLALIGGLLVYLYAPYWGVRKVPGPPSLPLVGHLPLLAKYGPDVFSVLAKQYGPIYRFHMGRQPLIIIADAELCKEAGIKKFKDISNRSIPSPISASPLHQKGLFFSRDSQWSIMRNTILSMYQPSYLSRLVPTMQSFIESATQNLDSQKEDIIFSNLSLRLATDVIGHAAFGVNFGLSSPHSVCDSIKNVNVNNNNNNASASSSNSNDNEVSDFINQHIYSTTQLKMDLSGSLSIILGLLLPILQEPFRQILKRIPGTMDWKIEHTNQKLSGRLDEIVEKRMKDKTRSSKDFLSLILNARETKSVSENVFTPEYISAVTYEHLLAGSATTSFTLSSVVYLVAGHPEVEKKLLHEIDGFGPVDQIPTSQDLHDKF…
	Clan711	CYP711	Glyma.17G227500.1	MVSIVLEWLFPFPCVAMFTTLLMLIGGLLGYLYGPYWGLRKVPGPPTLPLVGHLPLLAKYGPDVFSLLAKQYGPIYRFHMGRQPLILVADPELCKEVGIKKFKDIPNRSIPSPISASPLHQKGLFFTRDSRWSTMRNTILSVYQPSHLASLVPTMQSFIESATQNLDTPNEDIIFSNLSLRLATDVIGEAAFGVNFGLSKPHSVCESIKSVSVNNVRNDDDEVSDFINQHIYSTTQLKMDLSGSFSIILGLLAPILQEPFRQILKRIPGTMDSKIESTNEKLSGPLDEIVKRRMEDKNRTSKNFLSLILNARESKKVSENVFSPDYISAVTYEHLLAGSATTAFTLSSIVYLVAGHREVEKKLLQEIDGFGPPDRIPTAQDLHDSFPYLDQVIKEAMRF…
	Clan711	CYP711	Glyma.17G227500.2	MVSIVLEWLFPFPCVAMFTTLLMLIGGLLGYLYGPYWGLRKVPGPPTLPLVGHLPLLAKYGPDVFSLLAKQYGPIYRFHMGRQPLILVADPELCKEVGIKKFKDIPNRSIPSPISASPLHQKGLFFTRDSRWSTMRNTILSVYQPSHLASLVPTMQSFIESATQNLDTPNEDIIFSNLSLRLATDVIGEAAFGVNFGLSKPHSVCESIKSVSVNNVRNDDDEVSDFINQHIYSTTQLKMDLSGSFSIILGLLAPILQEPFRQILKRIPGTMDSKIESTNEKLSGPLDEIVKRRMEDKNRTSKNFLSLILNARESKKVSENVFSPDYISAVTYEHLLAGSATTAFTLSSIVYLVAGHREVEKKLLQEIDGFGPPDRIPTAQDLHDSFPYLDQVIKEAMRF…
	Clan72	CYP714	Glyma.06G140000.1	MEEVFVAMKLVFSVAVVGILSWIFYVYGNLWHESQRVRKRLQMQGIKGPPPSFLHGNLPDMQRIQSQAKAASTSNSNHSDQFLAHDYTATLFPYFEHWRKQYGLLYTYSTGMKQHLYVNQPDLVREMNQSITLDLGKPTYITNKLAPMLGNGILRANGLSWAQQRKLVAAEFFMDKVKGMVGLMIESAQPLLLKWEQLIESQGSATAEVKVDVNLRGFSADVISRVCFGHSYSKGKEVFSKLRSIQKAMSKHGGFLFGLSSFRDKLKHFSSNKQNEIAGLEKEIESLIWELVEERKRECSETSSSEKDLMQLLLEAAMTDQSLGKDFSKRFIVDNCKNIYFAGHETTAVAASWCLMLLALHPEWQTRIRTEVAELCPNGVPDADSVPLLKTVAMVIKEV…
	Clan72	CYP714	Glyma.18G218500.3	MEAEGQWQISEREICWSVVFIATCSIIILLYVKLWYRPQRIRSVLQKQGINGPKPSFPFGNISEMQQLPNQLAPVSLEALDEWAYSIFPYFHTWRQLYGPMFMYSTGTNEHLYVETPELVKWIGMHKSLHLGRPSYLTKTLKPLLGNGIIRSNGLHWAFQRNLLAPEFFHSKIKNWVDIMEESTMAINKKWENHITESEGGIAELVIDGDMKALTADVISKACFGSTYAQGNLIFAKLASMQTALAKPNHIFGFLNLRFLPTKENKEIWKLQKEVEAMILKMIKEREAENQKSSTHGNQTQKDLLQIILEGATSATSTESSGKGIFGPGYNIYQSIVDICKNMYFAGSESTALAITWTLFLFALHPEWQQLVRSEIMETYGNMLPHSFRDMDRLRNLKA…
	Clan72	CYP714	Glyma.18G218600.1	MYKSKWLSQRVEMDVEGQWQISQREICWSMMFIASWSIIVLLYVKLWYRSQRIRSVLQKQGINGPKPSFPFGNLSEMQQLNQGAPVSLEALDKWAFSLYPFFHTWRQRYGPVFMYSTGTKQHLYVEIPELMKWIGLNTSLDLGRPSHLTKTLKPLLGDGIIMSNGLHWAFQRNLLVPEFFQSKIKNWVDIMGESTMAIIKKWESHITESEGGITELVIDGDMKTLTADVISKVCFGTSYALGNLIFAKLASMQAILAKSSVLFGFLNLRFLPTKENKELWKLQKEVETMILKVIKDREGENQKSGTHENEKDLLQIILEGAANATTGTSGKGIFGSRYNINQLIIDICKNIYFAGYESSALAIIWTLLLLALHPEWQQRIRSEIMETYDNTVPHSFLDM…
	Clan72	CYP714	Glyma.18G218600.2	MYKSKWLSQRVEMDVEGQWQISQREICWSMMFIASWSIIVLLYVKLWYRSQRIRSVLQKQGINGPKPSFPFGNLSEMQQLNQGAPVSLEALDKWAFSLYPFFHTWRQRYGPVFMYSTGTKQHLYVEIPELMKWIGLNTSLDLGRPSHLTKTLKPLLGDGIIMSNGLHWAFQRNLLVPEFFQSKIKNWVDIMGESTMAIIKKWESHITESEGGITELVIDGDMKTLTADVISKVCFGTSYALGNLIFAKLASMQAILAKSSVLFGFLNLRFLPTKENKELWKLQKEVETMILKVIKDREGENQKSGTHENEKDLLQIILEGYESSALAIIWTLLLLALHPEWQQRIRSEIMETYDNTVPHSFLDMDKLRNLKALTMVIQESLRLYGPSTMATREVLANEM…
	Clan72	CYP714	Glyma.07G118200.1	MEMNTVQVVLVAVVVVLIHVFNVLLLRSRSLRAKLHRQGIHGPSPHFYFGNIPEMKTLLLQVQSAPITQVKDKDDHDSLSHKWPFTLFPHIQKWISQYGPIYLFSSGTIQWLMVSDIEMVKEIIMYTSLNLGKPSYLSKDMGPLLGQGILTSSGPIWAHQRKIIAPELYLDKVKAMVNLIVDSTNVTLRSWEARLESEGAVSEIKIDDDLRSLSADIIARTCFGSNYIEGKEIFSKLRDLQKLLSKIHVGIPGFRYLPNKSNRQMWRLEKEINSKISKLIKQRQEETHEQDLLQMILEGAKNCEGSDGLLSDSISCDVFMIDNCKNIFFAGHETTAITASWCLMLLAAHQDWQDRARAEVLEVCGKGAPDASMLRSLKTLTMVIQETLRLYSPAAFVVR…
	Clan72	CYP714	Glyma.18G049500.1	MQLQLDSQFFMSIVFLGFVGLLCRLYTSLVENPNRLRSKLMKQGISGPPPTILLGNIVDIKKARSTTSNSPSFEIPVSHNCASVILPLFDKWKEQYGQVFMFSLGNRQILCVSQPDIVRDITTCTSLDLGKPSYQQKQLGPLLGQGVLTSNGTTWVHQRKILAPELYMEKVKGMMNIISESAISLLNLWKSRTEAEGGVADIKIDEYMRNFSGDVISRACFGSNYSKGEEIFLKLGALQEIMSWKNVSIGIPGMRYLPTKTNREAWKLEKEVKKLILQGVKERKETSFEKHLLQMVLEGARNSNTSQEAIDRFIVDNCKNIYLAGYETTAVAATWCLMLLASNQNWHDRVRTEVLEICRGSIPDFNMLCKMKQLTMVIHESLRLYPPVAVVSRQAFKDM…
	Clan72	CYP715	Glyma.09G137600.1	MEFSSAVAFIFSILPLLLLLKLTFSWWVSPILNHLKLKRCGFGGPLPSFPLGNIQEMKKKNSLSSSLGSSNLTHDIHSTVFPYFSRWQNSHGKVFIYWLGTEPFLYIADPEFLKKMSTEVLAKRWGKPRVFRHDRDPMFGNGLVMVEGNEWVSHRHVIAPAFSPLNLKAMASMMTESTNQMIDRWIAQINSGNPKIDVEREVVETAGEIIAKTSFGMKGKNAKEVSEKLRALQMTLFKTTRYVGVPFGKCFNVKKTLEAKKLGKEIDKLLLSVITSRMKSIKRQTQEDLLGLLLQGNNNHQDDGKLGKTFTTRDLLDECKTFFFAGHETTALAISWTLFLLAMHEDWQIQLRDEIREVVGDKELDINTLAGLRKMKWVMNEVLRLYPTAPNVQRQARED…
	Clan72	CYP715	Glyma.10G234600.1	MEFLGLTGVLVAFLAALCLFLLLILTFSWWVFPNQTLKKLKKCGLGGPIPTFPLGNIKEMKRKNNIQSYAVSSNLTHDIHSYVFPYFSSWQKSHGKVFVYWLGTEPFLYVAEPEFLKKMSTVVMAKKWGKPSVFRTDRDPMFGSGLVMVEGNDWVRHRHIVAPAFNPINLKDMANMMVDSTNQMIERWFSQINSIGNSEIDIEREIIATAGEIIARTSFGMKDDNARDVFDKLRALQMTLFKTNRYVGVPFGKYFNVKKTLEAKKLGKEINELLLSIIETRKNSPKKNSQQDLLGLLLQENNNQVDGRSGKTLSTQEVVDECKTFFFGGHETTALAITWTLLLLAMHEDWQNQLRDEIRQVVENTEELDISILAGLKKMKWVMNEVLRLYPPAPNVQRQ…
	Clan72	CYP715	Glyma.10G234700.1	MEFFLGLCGVLVAFSAALCLLLLLILTFYWVVFPNQTLKKLKKCGLGGPTPSFPLGNIEEMKRKNNIQSSIVSSNFSHDIHSSVFPYFSSWQKSHGKVFVYWLGTEPFLYVAEPEFLKKMSTVVMAKKWGKPSVFRTDRDPMFGSGLVMVEGNDWVRHRHIVAPAFNPINLKAMANMMVESTNQMIDRWANQINTGNPEFDVEREITATAGEIIARTSFGMKDGNARDAIAKLRALQMTLFKTNRYVGVPFGKYFNVKKTLEAKKLGKEIDELLLSIIESRKNSPTKNSQQDLLGLLLQGNHQVDGRSGKTLSSREVVDECKTFFFGGHETTALAITWTLLLLAMHEDWQNQLRDEIRQVVGGYEKLDITSLSGLKKMKCVMNEVLRLYPPAPNVQRQA…
	Clan72	CYP715	Glyma.16G182600.1	MEFSALALFSILPLLLLLKLTFSWWVSPIINHLKLKRCGFGGPPPSFPLGNIQEMKKKTSVSSSLGSSNLTHDIHSTVFPYFFRWQNSHGKVFIYWLGTEPFLYIADPEFLKKMSTEVLAKRWGKPRVFRHDRDPMFGNGLVMVEGNEWVRHRHVIAPAFSPLNLKAMASMMTESTNQMIDRWIAQINSGNPEIDVEREVVETAGEIIAKTSFGMKGKNAKEVSEKLRALQMTLFKTTRYVGVPFGKCFNVKKTLEAKKLGKEIDKLLLSVITSRMKSIKRQTQEDLLGLLLQGNNHQGDGKLGKTFTTRDLLDECKTFFFAGHETTALAISWTLLLLAINEDWQIQLRDEIREVVGDKELDINVLAGLRKMKWVMNEVLRLYPTAPNVQRQAREDIKV…
	Clan72	CYP715	Glyma.20G159700.1	MEFLGLAGVLVAFLAALCLFLLLILTFSWWVFPNQTLKKLKKCGLGGPTPSFPLGNIKEMKRKNNIQSSSVVQSSNLTHDIHSYVFPYFSSWQKSHGKVFVYWLGTEPFLYVAEPEFLKKMSTVVMAKSWGKPSVFRTDRDPMFGSGLVMVEGNDWVRHRHIVAPAFNPINLKAMANMMVESTNQMIERWATQINTGNPELDVEKEIIATAGEIIARTSFGMKDDNARDAIAKLRALQMTLFKSNRYVGVPFGKYFNVKKTLEAKKLGKEIDELLLSIIESRKNSPKKNSQRDLLGLLLQGNHQVDGRSGKTLTSREVVDECKTFFFGGHETTALAITWTLLLLAMHQDWQNQLRDEIREVVGNTLELDISMLAGLKKMKWVMNEVLRLYPPAPNVQRQ…
	Clan72	CYP72	Glyma.08G238100.1	MLMSGTEQVTMGGLGLNLTPITTFAIITVIATVLIWWFWNALNWVWLRPKRIERRLKEQGIQGNSYRPLIGDIRDMVKMIKEAKSKPMDPHSNDIAPRVLPYVVHTIAKYGKSSFMWLGPTPRVFILDPDKFKEMATKVYDFQKPDTSPLFKLLASGFANYDGDKWAKHRKIVSPAFNVEKMKLLVPIFCQSCDDLISKWESLLSSSNGSCELDVWPFVQNVSSDVLARAGFGSSYQEGKKIFELQREMIQLTMTLFKFAFIPGYRFLPTHTNRRMKAIDKEIRESLMVIINRRLKAIKAGEPTNNDLLGILLESNYKESEKSSGGGMSLREVVEEVKLFYLAGQEANAELLVWTLLLLSRHPDWQEKAREEVFQVFGNEKPDYERIGQLKIVSMILQE…
	Clan72	CYP72	Glyma.06G238500.1	MEPLFSSAAAICVVTVLVAVIPIWALKMLNSLWLRPKRFERLLRAQGFHGDPYSLSHHNSNQTLLQQHQLNSQPFPLSDDVAPRVSSLLHHTIDKYGKKSFFWEGRTPKVIITDPNQLKEVFNNIHDFQKPKFSDNVKFLFAGLLNYEGDKWAKHRRIMNPAFHSEKLKNMLPAFSQSCHDMISMWKGMLSSDGKCEIDIWPFLQNLTRDVISQTAFGSSYAEGEKFFRNLRMQGYLLMAGKYKNIPILRHLRTTTTKRMEAIEREIRDSIEGIIKKREKAMENGETSNEDLLSILLESNHKEIQGHGNSRAVGMTKQEVIEECKLFYLAGQETTSSLLVWTMVLLARYPEWQARARDEVFQVFGNQNPNIDGLSKLKIVTMILYEVLRLYPPTTFFSR…
	Clan72	CYP72	Glyma.13G261700.1	MGFTPTSTATCFLIIAPLVVLWCWKLLKWVWLRPKRLERALRAQGLQGNPYSLLIGDTKEMYTVLMQAARSQQSTSSFLSKDKDAAPHITTFNHHIVNKFGKNSFFWEGTKPKVVITDPEQIKEVFNKIQDFEKPKLSPIVKLLGSGLANLEGEKWRTHRKIINPAFHLEKLKVMLPIFLECCDDMVSKWERLLSSNDKSEIDVWPFLQNLTCDIISRTAFGSSYEDGKRIFELLKEQTGLMMKLQNAYIPGWWLLPTTTNKRMKKIDTEIRALLKGVINKRENAMKAGEVLNNDLLGMLLESNRMEIQDHGKNNIIAMTSLEVIEECNAFYIAGQETTSVLLVWTMVLLSRYPHWQERAREEVLHVFGNQKPDYNGLSHLKIVTMILYEVLRLYPPLI…
	Clan72	CYP72	Glyma.15G245300.1	MGLPPTIATCFLILVLPLVVLCLWKLLNWVWLRPKKLERALRAQGLQGNPYRLLVGDNREKFRILMNASKSQQSTSSLSDDKNVAPHIVTFNHHIVNKFGKNSFLWEGTTPKVIITDPEQIKEVFNKIQDFEKPKLSPLINLLGNGLTNLQGEKWRIHRKIIDPAFHFEKLKVMLPTFFKCCDEMVSKWEGMLSSDNKCEIDVWPFLQNLTCDIISRTAFGSSYEEGKRIFELLKEQAGLIMKLRNVYIPGWWLLPTTTHRRMKEIDTDIRASLKGIINKREKAMKAGEVLHHDLLGMLLESNRMEIHEHGNNKTVAMTSQEVIEECNAFYIAGQEATSTLLVWTMILLSRYSDWQAHAREEVLHVFGNQKPDYDGLSHLKIVTMILYEVLRLYPPAVY…
	Clan72	CYP72	Glyma.06G227300.2	MEVDATTMMFVGFCIAFVTILLTKALSWLWLEPKRAERYLRRQGLKGNSYTLFFGDIKAISTLIQKAKSKPIDINDDVTPRLVPFQHQLIRNYGKNSFFWYGPKPVVHIMDPEAIREVLNLINDFPKPTLTPLSKFLITGLVDLDGDKWSKHRKIINPAFNLAKLKLVLPAMYHSCNQMMNEWKMLVSKKESCMVDVWPFLNSLTGDVISRTAFGSCYEEGKIVFQLQKEQAELTAKVFQSVYIPGWRFVPTKLNKRMKEIDFEIRNVLSGIIQKQEAAMKTCKAPNDNLLGLLLESNQKEIEDRGHRKDVGMNTDDVINECKLFYFAGQETTSVLLNWTMVLLSRFPNWQTLAREEVIGIFGTKEPDYDGLNRLKVVTMILYEVLRLYPPVTAITRVV…
	Clan72	CYP72	Glyma.15G243300.2	MEAAWVNILMLILILALIWVWKKFNSLWLTPKRLEKILREQGLRGSPYRFKVGDTKETLKMQMQAMSKPMNLFSNDIGPRVSPYDHYIVNKHGKNSFIWNGQTPRVTLTDPELIKDVFNKIYDFGKPNMGPNIRSLIPGLAMHEGEKWSKHRKIINPAFNLEKLKNMLPLFIQCCDDLISKWEEMLSSDGSSEIDVWPFVKNLTADVISRTAFGSSYLEGRRIFQLLKEKIELTLKMRGQRLVPKRMKEIDRDIKASLMDIINKRDKALKAGEATKNNLLDILLESNHKEIEEHGNNKNVGMNIEEVIEECKLFYFAGQDTTSVLLVWTMILLSRYPDWQARAREEVSQVFGNQKPTFDGLNQLKIVTMILYEVLRLYPPGVGVPRKVIKDVKLGNLSF…
	Clan72	CYP72	Glyma.15G243300.5	MEAAWVNILMLILILALIWVWKKFNSLWLTPKRLEKILREQGLRGSPYRFKVGDTKETLKMQMQAMSKPMNLFSNDIGPRVSPYDHYIVNKHGKNSFIWNGQTPRVTLTDPELIKDVFNKIYDFGKPNMGPNIRSLIPGLAMHEGEKWSKHRKIINPAFNLEKLKNMLPLFIQCCDDLISKWEEMLSSDGSSEIDVWPFVKNLTADVISRTAFGSSYLEGRRIFQLLKEKIELTLKMRGQRLVPKRMKEIDRDIKASLMDIINKRDKALKAGEATKNNLLDILLESNHKEIEEHGNNKNVGMNIEEVIEECKLFYFAGQDTTSVLLVWTMILLSRYPDWQARAREEVSQVFGNQKPTFDGLNQLKIVTMILYEVLRLYPPGVGVPRKVIKDVKLGNLSF…
	Clan72	CYP72	Glyma.03G226800.1	MEEASCVCLVVILILALTLAWRVLNWLWLRPKRLERLLREQGLQGNPYRLLVGDLKEIMNMQKEVTSKPMNLSHDIVPRVFSFLQHTLNTHGKNSFIWFGRKPRVIITEPELIKDVLNKMHDFPKPDTSPLVKLLATGLLNHEGEKWNKHRRIISPAFNLEKLKNMLPIFYKSCNDLIIKWEEMLSSDGSCEIDVWPFLQNLSSDAIARTAFGSSYEEGRKIFQLLKEQAELAMKAIMKLYIPGWRFLPTANHRRMKEIDREIKASLTDMISNREKALKAGEATENDLLGILLESNHKETEEHGNSKNVGMSLEDVIEECKLFYFAGQETTSALLVWTMVLLSRYPDWQARAREEVLQVFGKQKPNFDGLSHLKIVSMILNEVLRLYPPAVGLNRNVDR…
	Clan72	CYP72	Glyma.13G262000.1	MKYLLLSLFHGSSTFSTEREMEAASWPTIILLLIIMIWAWKMLNWLWLRPKRLERLLREQGLQGNSYTLFVGDLKEFGKMRNEALSKPMNLFSHDIAPRVLSFIQHTVNKHGKNSFIWFGPIPRVTLTDPEQIKDVLNKIYDFGKPDMNPHVRLLAPGLVSHEGEKWSKHRKIINPAFNLEKLKNMLPLFIKCCDDLISKWEGMLSSDGTSETDIWPFFQNLASDVISRTAFGSSYEEGRRIFQLLKEQTELTIQTFLKVNIPGWRFVPTTTHRRMKEINKDIEASLMDMINKRETALKAGEATKNNLLDILLESNHKEIQEQGNKNVGMNLEEVIEECKLFYFAGQETTSVLLVWTMILLSMYPDWQTRAREEVLQVFGNRKPNFEGLNHLKIVTMIL…
	Clan72	CYP72	Glyma.13G262100.1	MEAAWITILVLILILSLIGAWKLLNWLWLTPKRLERLLREQGLQGNPYTLLVGDSMEVIKIRKEALSKPITLFSHDIVPRVSSYAQHTLNKHGKNSFIWFGPIPRVTLTDPELIKEVLNKIYDFGKLKLNPHVKLLVPGLARLEREKWSKHRKIINPAFNLDKLKNMLPLFIKCCDDLISKWEGMLSSDGSSEINVWPFLQNLASDAISRTAFGSSYEEGRRIFQLLKEQTELTMKIILKVYIPGWRFVPTTTHRRIKEIDRVIKALLMDMINKREKALKADEATKNNLLDILLESNHKEIQEHKNNKNVGLNLEEVIQECKLFYFAGQETTSVLLVWTMILLSRYPDWQTRAREEVLKVFGNQKPNFDGLSHLKIVTMILYEVLRLYPPAIGLVRKVN…
	Clan72	CYP72	Glyma.13G277100.1	MEAPWATTSSSIVFVIVILALTSWAWRMLNWLWIRPKRLERLLREQGLQGNPYRILVGDLKEIVKLQMEARSKPMNLSHDIVPRVFAHLHQSVLKHGKNSFIWFGPKPRVTLTDPELIKDVLNKISDFRKPEANPLAKLLATGLVNYDGEKWNKHRRLINPAFSLEKLKIMLPIFFKSCNDLIIKWEGMLSYDGSCEMDVWPFLQNLASDVIARTAFGSSFEEGKRIFQLQKELAELTMKVIMKVYIPGWRFVPTATNRRMKEIDRYIKASLTDMIKKREKAPKTGEATRDDLLGILLESNHKEIQEHRNNENVGMNLNDVIEECKLFYFAGQETTSVLLVWTMVLLSRYPDWQSRAREEVLQVFGKQAPNFDGLSHLKIVTMILYEVLRLYPPGIGLT…
	Clan72	CYP72	Glyma.13G277100.2	MEAPWATTSSSIVFVIVILALTSWAWRMLNWLWIRPKRLERLLREQGLQGNPYRILVGDLKEIVKLQMEARSKPMNLSHDIVPRVFAHLHQSVLKHGKNSFIWFGPKPRVTLTDPELIKDVLNKISDFRKPEANPLAKLLATGLVNYDGEKWNKHRRLINPAFSLEKLKIMLPIFFKSCNDLIIKWEGMLSYDGSCEMDVWPFLQNLASDVIARTAFGSSFEEGKRIFQLQKELAELTMKVIMKVYIPGWRFVPTATNRRMKEIDRYIKASLTDMIKKREKAPKTGEATRDDLLGILLESNHKEIQEHRNNENVGMNLNDVIEECKLFYFAGQETTSVLLVWTMVLLSRYPDWQSRAREEVLQVFGKQAPNFDGLSHLKIVTMILYEVLRLYPPGIGLT…
	Clan72	CYP72	Glyma.15G244250.2	MEAAWATILTLILILALICAWKVLIWLWLRPKRLEKLLREQGLQGNPYTLFVGDSKEFLKMRKEALSKPMNLSDDIIPRVSSYEQHSVNKHGKNSFIWLGPIPRVTILDPEQIKDVFNKIYDFPKPNMNPLVKLLATGLAGYEGEKWSKHRRIINPAFNLEKLKIMLPLFFKSCNDLVSKWEGMLSSEGSCEMDAWPFLQNLASDVIARSAFGSSYEEGRRIFQLQREQAELLIKVLLKIQIPGWRFLPTNTHRRMKEIDRDIKASLKDMINKREKALKAGEATKNDLLGILLESNHKEIQEHGNRNNKNVGMSLEEVIEECKLFYFAGQETTSVLLVWTMVLLSRYPDWQARAREEVFQVFGYQKPDFDGLSRLKIVTMILYEVLRLYPPVAGMTRSI…
	Clan72	CYP72	Glyma.15G244250.3	MEAASATILLLILILALICSWKVLNWLWLRPKRLEKLLREQGFRGNPYTLFFGDSKEFLKMRKEAVSKPMTLSDDIVPRVSAYVQHSVNKHGKNSFIWFGPMPRVTILDPEQIKDVFNKNYDFPKPNLNPLVKLLATGLAGYEGEKWSKHRRIINPAFNLEKLKIMLPLFLQSCNDLVSKWEGMLSSEGSCEMDAWPFLQNLTSDVIARSAFGSSYEEGRRIFQLQREQTEHLMKVILKIQIPGWRFLPTKTHRRMKEIDREIKASLKNMINKREKALKSGEATKNDLLGILLESNHKEIQEHGNRNSKNVGMSLEDVIEECKLFYFAGQETTSVLLVWTMVLLSRYPDWQARAREEAFQVFGYQKPDFDGLSRLKIVTMILYEVLRLYPPLIGMNRLV…
	Clan72	CYP721	Glyma.09G117400.2	MNLLLAAVTLLVFYAAKFFYSNFWVPWRTERHFKRQGIGGPGYRPIFGNTSEIRRLYAEAKSEASASPPPFHHDIMGRVAPFYDRWSRAYGKTFLYWFGSTPRLAVTEPDMIKEVLMNTRGEYVKVPFNPQSKLLFGQGLVGLEGDQWALHRRIINLAFNLELVKGWVPDIVASVTKKLESWEDQRGGRDEFEIDVLRELHDLSADVISRTAFGSNYEEGKHIFNLQEQQMHLFSQAVRSVYIPGFRYLPTKKNKDRWRLEKETRESILKLIETKSNTRENARNVLSSLMCSYKNDAGGEEKLGVEEIIDECKTIYFAGKETTANLLTWALLLLAKHQEWQSKARKEVLHVIGRNRLPAADNLNDLKIVTMIINETLRLYPPAVMLMRQASKDVMLGSI…
	Clan72	CYP721	Glyma.17G249400.1	MHHLLLFVILVVLLVFLARVAYSIIWVPWVIARHFREQGIRGPSYRPIKGNTDEIRGMYAEVQSRPMALCHDILERVCPFYHKWSRMYGKTVLYWHGSDPRLVLSDPDMIKEILLKTGDWFERIDPNPSAKRFFGEGILVLKRDKWAVHRAIANQAFKIERVKCWIPQIIDSTKTMFYKWEDENKGVDEFEIEVSKDLHDLTSDIISKVAFGSNYEEGKGIFDLLEQHYHLVSLASRSVYLPGFRFLPTKKNRERKRLEKKTSESIQVLINDNYKAEQNSENLLSLLMSSHKFIKNETQKLSMVEIVDDCKNFYMAGKETSANSLSWALLLLGINQEWQSKAREEVLSVLGPNTSPTSEALNDLKLVSVNLILQETLRLYPNPGTLVRQASKRVQLRNI…
	Clan72	CYP721	Glyma.17G249400.2	MHHLLLFVILVVLLVFLARVAYSIIWVPWVIARHFREQGIRGPSYRPIKGNTDEIRGMYAEVQSRPMALCHDILERVCPFYHKWSRMYGKTVLYWHGSDPRLVLSDPDMIKEILLKTGDWFERIDPNPSAKRFFGEGILVLKRDKWAVHRAIANQAFKIERVKCWIPQIIDSTKTMFYKWEDENKGVDEFEIEVSKDLHDLTSDIISKVAFGSNYEEGKGIFDLLEQHYHLVSLASRSVYLPGFRFLPTKKNRERKRLEKKTSESIQVLINDNYKAEQNSENLLSLLMSSHKFIKNETQKLSMVEIVDDCKNFYMAGKETSANSLSWALLLLGINQEWQSKAREEVLSVLGPNTSPTSEALNDLKLVNLILQETLRLYPNPGTLVRQASKRVQLRNIDI…
	Clan72	CYP734	Glyma.05G010200.1	MEELFSSLKLLSFTFMLLLFLLKLTVLLWWRPRKIEGHFSKQGIRGPPYRFFIGNVKELVGMMLKASSQPMPFSHNILPRVLSFYHHWKKIYGATFLVWFGPTVRLTVSEPDLIREIFTSKSEFYEKNEAPPLVKQLEGDGLLSLKGEKWAHHRKIISPTFHMENLKLLVPVMATSVVEMLEKWSAMGEKGEVEIEVSEWFQSLTEDVITRTAFGSSYEDGKAIFRLQAQQMDLAADAFQKVFIPGYRFFPTRRNIRSWKLEKEIKKSLVKLISRRRENEKGCGVEEKEKGPKDLLGLMIQASNMNMNMSNVTVDDMVEECKSFFFAGKQTTSNLLTWTTILLAMHPHWQVRAREEVLKVCGSRDHPTKDHVAKLRTLSMIVNESLRLYPPTIATIRRA…
	Clan72	CYP734	Glyma.06G215200.1	MMMEEFKILFVFLMTLLLVLKVTISLWWRPRKIEGHFSNQGIRGPPYRFFIGNVKELVGMMMKASEKPMPFSHNILPRVLSFYHHWKKIYGATFLVWFGPTVRVTISDPDLIREIFTSKSELYEKNESPPLVKQLEGDGLLSLKGEKWAHHRKIISPTFHMENLKMLIPIMATSVVEMLEKWKAMAEEKGEVEIEVSECFQTLTEDVITRTAFGSSYEDGKAVFRLQAQQMVLAADAFQKVFIPGYRFFPTRRNINSWKLDKEIKKSLVKIIERRRKENACGKEETKRPTDLLGLMIWASNNNNNTTSNVNVTVDDIVEECKTFFFAGKHTTSNLLTWTTILLAMHPQWQIRAREELVSVCGARHIPTKEDLAKLKTLSMIVNESLRLYPPTIATIRRT…
	Clan72	CYP734	Glyma.17G118100.1	MEDIFSSLKLLSFSFMLLLFLLKLTILLWWRPRKIEAHFSKQGIRGPPYRFFIGNVKELVGMMLKASSQPMPFSHNILPRVLSFYHHWKKIYGATFLVWFGPTVRLTVSEPELIREIFTSKSEFYEKNEAPPLVKQLEGDGLLSLKGEKWAHHRKIISPTFHMENLKLLIPVMATSVVEMLEKWSAMGVKGEVEIEVSEWFQTLTEDVITRTAFGSSYEDGKAIFRLQAQQMDLAADAFQKVFIPGYRFFPTRRNIKSWKLEKEIKKSLVKLIWRRRECGGVEEKGPKDLLGLMIQASNMNSSSNVTVDDIVEECKSFFFAGKQTTSNLLTWTTILLAMHPHWQVRARDELLKLCGSRDLPTKDHVAKLRTLSMIVNESLRLYPPTIATIRRAKADVDL…
	Clan72	CYP735	Glyma.08G365000.1	MTMVVLTPLLAIVGIILLLKLVYDNLSCYWLTPLRIKKMMDMQGVRGPKPCFFTGNILDMASLVSKATSQDMKTISHDIVGRLLPHFLLWSGQFGKRFLYWNGSEPRLCLTETKLIKEFLSKHSTVSGKSWQQRQGSKNFIGEGLLMANGEDWYHQRHIVAPAFMGDRLKSYAGHMVECTKEMLQSMKIALESGQTEVEIGHYMTKLTADIISRTEFGTSYQKGKKIFHLLTLLQTRCAQASRHLCIPGSRFFPSKYNREIKSLKMEVETLLMEIIQSRKDCVEIGRSNSYGNDLLGMLLNEMQKKKGNGNNNNSSINLQLVMDQCKTFFFAGHETTALLLTWTVMLLASNKSWQDKVRAEVTNVCDGGIPSLDQLSKLTLLHMVINESMRLYPPASVL…
	Clan72	CYP735	Glyma.13G046400.1	MAMVILTTLLVIFVTVLLKVAYDTISCYWLTPMRIRKIMERQGVHGPKPRFLIGNIIDMTSLVSRAVSQDMKTINHDIVGRLLPHFVAWSNQYGKRFLYWNGTEPRLCLTDTEMIKEFLSKYSTTSGKSWQQQQGTKHFIGRGLLMANGEEWRHQRHMVAPAFMGDRLKSYAGHMVECTKDMLQSLQNALEVGQSEVEIGECFTELTADIISRTEFGTSYQKGKQIFYLLTQLQSRVAQATRHLFFPGSRFFPSKYNREIKSMKMEVERLLMEIIESRKDCVEMGRSNSYGNDLLGILLDEIKKEGGTLNLQLVMDECKTFFFAGHETTALLLTWTAMLLASNPHWQDKVRAEVKEVFKGEIPSVDQLSKLTLLHMVINESMRLYPPATLLPRMAFKDI…
	Clan72	CYP735	Glyma.18G297200.1	MAMVVLTPLLAILGILLLKLIYDSLSCYWLTPLRIKKTMDMQGVRGPKPRFFTGNILDMASLVSKATSQDMKTISHDIVGRLLPHFLLWSSQFGKRFLYWNGSEPRLCLTETELIKEFLSKHSTVSGKSWQQRQGSKNFIGEGLLMANGEDWYHQRHIVAPAFMGDRLKSYAGHMVECTKEMLQSLKIALESGQTEVEIGHYMTKLTADIISRTEFGTSYQKGKKIFHLLTLLQSRCAQASRHLCIPGSRFFPSKYNREIKSLKMEVETLLMEIIQSRKDCVEIGRSNSYGNDLLGMLLNEMQKKKKGNGNNNSSINLQLVMDQCKTFFFAGHETTALLLTWTVMLLASNTSWQDKVRAEVKSVCNGGIPSLDQLSKLTLLHMVINESMRLYPPASVLP…
	Clan727	CYP727	Glyma.06G310800.1	MNDIIACAAAAANSSLPTSVLGVLHFLHSRGRSSSCVHTPSELLRDFATREFNAFLWLCLVAVTTLLLRRLFNLFRLWHRAKTIPGPPSPSFFGHCKLFSRQNFTFTDVLSESHQKYGPIVKLWLGPTQLLVSVTDPALIQEMLIKAKDKLPFTGKVFHLAFGESSLFAPSFEKVQKRRELLANELHERLLKSDDVIPMKVADFITDKIENIRTKRGINSRLVSQHMAFTIMGATFFGDGFLASPKAAIYEELFMMIAKDACFWASYNVTPFWRHEFWRYQCLCTKLKCLTQDILQHFRKGCKLFGQTDQDVRNESSNKETKSADGAQCCSGDDFQDYFFFRDLKDHQDGKEEPCGNIMRVIFHGCQTTSALITNVLTRLVMHLEIQDKVYSEISIVGR…
	Clan74	CYP74	Glyma.04G035000.1	MTSITSASLPLLQLQSSLKRKPCNLKSSTTMRRFTTKASASETTSAAAPAPEPSKLPMRKIPGDYGLPFIGPIKDRLDFFYNQGRDKFFQSRAQKYNSTVFRANMPPGPFIASNPNVIVLLDAKSFPVLFDVSKVEKRDVFTGTFMPSTQLTGGYRILSYLDPSEPRHEQLKRLLFFLLKSRSSHVIPEFHSSYTTLFETLENELAKEGKASFQTANDQAAFNFLARALYGTNPSDTNLGRDGPSIIQTWLLFQLGPIMTLGLPKFLEDPTLHTFRIPPFLIKKDYKRLYDFFYESSGFALDEAVRLGVPREEACHNLLFATCFNSFGGMKIFFPTILKWVGRAGVKLHARLAEEVRAAVKSNGGKVTMASMEEMPLMKSVVYEAFRIEPPVPLQYGRA…
	Clan74	CYP74	Glyma.14G078600.1	MPPGPFLAPNPNVVVLLDAKTFPILFDNSKVDKRDVFTGTFMPSTQLTGGYRVLSYLDPSEPKHSLLKQLMFFLLKSRRAHVISEFHASYKDLFHELEANLAEAGKASFGDANDQAAFNFLARSLFNSNPADTKLGRDGPKIVQKWVLFQLGPILRLGLPQFLEESTIRSFRLPFSLIQKDYQRLYDFFYQSSGSVLDEAERLGITRDEACHNLLFATCFNSFGGMKLFFPNVLKWIGRAGVKLHARLAEEIRSAVRGAGGEITMAAMENMPLMKSVVYEAFRIDPPVPLQFGRAKRDLIIESHDHAFQVKEGEMLFGYQPFATKDPRIFERAEEFVGDRFVGEEGEKLLKHVLWSNGPETESPTIGNKQCAGKDFVTLVSRLLVVEFFLRYDSFEIQV…
	Clan74	CYP74	Glyma.17G246500.1	MASSASTTLSSPFLRLEFPSSTKQRSSISIRASVSEKPPLPAVSVTSPEPSKLPIRKIPGDCGFPVIGPFKDRQDYFYKQGRDEFFKSRIQKYQSTVFRTNMPPGPFLAPDPNVVVLLDAKSFPVLFDNSKVEKKDVFTGTFMPSTELTGGYRVLSYLDPSEPKHALLKQLMFFLLKSRRAHVISEFHASYKELFHALEANLAEAGKASFGDANDQAAFNFLSRSLFNSNPADTKLGLDGPKIVQKWVLFQIGPILRLGLPQFLEESTIRTFRLPFSLIKKDYQRLYDFFYESSGLVLDEAERLGITRDEACHNLLFATCFNSFGGMKLFFPNVLKWIGRAGVKLHARLAEEIRSAVRSGGGEISMAAMEKMPLMKSVVYEAFRIDPPVALQFGRAKRD…
	Clan74	CYP74	Glyma.12G191400.1	MSLPPPSLVTAATPTELPIRQIPGSYGFPLLGPISDRLDYFWFQKPESFFRKRVEKYKSTVFRTNVPPSFPFFVNVNPNVIAVLDVKSFSHLFDMDLVDKKDVLVGDFVPSVAFTGNMRVGVYQDTTEPQHSKVKNYIMDILKRSSGIWVSELESNLDTLWDNIEASLSKSSSVSYLFPLQQFLFTFLCKVLAGADPARDPKIAESGYSMLNSWLALQLLPTVSVGILQPLEEIFLHSFAYPFFLVGGNYNNLYNFIKQQGKDTINRGAIGFGLTEEEAIHNLLFVLGFNSYGGFSIFLPSLIDAIASNSALQEKLKKEAREKGGSTLTFDSVKEMDLIQSVVYETLRMNPPVPLQYGRARKDFRLSSHDSVFHVKKGELLCGFQKLVMRDSVIFDEPD…
	Clan74	CYP74	Glyma.07G162900.1	MISLIKNKINHLAPPTHHYSSLLLLPLSSKHTSSTMAAPSSETKSPSSSNTQLPLKPIPGSYGMPFFGAISDRHNYFYHQGRDKFFATRIEKHNSTVIRTNMPPGPFISSDPRVVALLDGASFPILFDNDKVEKLNVLDGTFMPSTKFTGGFRVCAYLDTTEPNHALIKQFFLNVLAKRKDSFVPLFRNCLQESFAEIEDQLSKNTKADFNTVFSDASFNFMFRLFCDGKDPSQTNLGSKGPKLVDTWLLFQLAPLATLGLPKIFNYIEDFLIRTLPFPACLTKSGYKNLYEAFKTHATTALDEAEKLGLKRNEACHNVVFTAGFNAYGGLKNQFPYVLKWLGLSGEKLHADLAREVRRVVNDEGGVTFTALENMPLVKSVVYEVMRIEPAVPYQYARA…
	Clan74	CYP74	Glyma.11G122700.1	MASSDSKLPLKPIPGSYGLPFFGPMSDRHDYFYNQGRDKFFAERIKKYNSTVIRTNMPPGPFISSNPRVIALLDGVSFPILFDNSKVDKRDVLDGTFMPSTSFTGGYRACAFQDTTEPSHALLKRFYLNFLASKHETFLPLFRNNLSDHFSDLEDKLAGKSGKASFNSSVGSATFNFLFRLLSDKDPSETIIGSDGPSLVQTWLAAQLAPLATLGLPRIFNYVEDFLIRSIPFPAWTVKSSYKKLYEGLSTAGTAILDEAERVGIKRDEACHNLVFMLSFNAQGGLVNQFPILIKWLGLAGEGLHKQLAEEIRTVVKDEGGVSLRALDQMTLTKSVVYEVLRIEPAVPFQYAKAREDLVVESHDAAYEIKKGEMIFGYQPFATKDPKIFENAEDFVAHR…
	Clan85	CYP707	Glyma.14G082900.1	MDGIFAYIILILVTIFSFMFLPKPNRRRPQNQTLAKLPPGSMGWPYIGETLQLYSQDPNAYFSTKHKRYGEIFKTNILGCPCVMLTSPEAARFVLVTQAHLFRPTYPKSKERLIGPFALFFHQGEYHTRLRKLVQRSLSLEALRNLVPHIETLALSAMNSWGGDGQVINTFKEMKRFSFEVGILTVFGHLEPRLREELKKNYRIVDNGYNSFPTCIPGTQYQKALLARRRLGKIICDIICERKEKKLLERDLLSCLLNWKGEGGEVLSDDQIADNIIGVLFAAQDTTASAMTWVVKYLHDEPKLLESVKAEQKAIHKSNEGNLPLSWDQTRNMRITHKVVLESLRMASIISFPFREAIADVEYKGFLIPKGWKAMPLFRNIHHNPEFFPEPQKFNPLRF…
	Clan85	CYP707	Glyma.17G242200.1	MSRAKKYAAILIFIFIFIFCFLRKKANLLTFQRTESSNTPMDGIFAYTILILLTIFSFMFLPKPNRRRPQNQTLAKLPPGSMGWPYIGETLQLYSQDPNAYFSTKHKRYGEIFKTNILGCPCVMLTSPEAARFVLVTQAHLFRPTYPKSKERLIGPFALFFHQGEYHTRLRKLVQRSLSLEALRDLVPHIEALALSAMNSWGGDGQVINTFKEMKMFSFEVGILTIFGYLEPRLREELKKNYRIVDNGYNSFPTCIPGTQYQKALLARRRLGKIIGDIICERKEKKLLERDLLSCLLNWKGEGGEVLSDYQIADNIIGVLFAAQDTTASAMTWVVKYLHDEPKLLESVKAEQKAIHKSNEGNLPLSWDQTRNMRITHKVVLESLRMASIISFPFREAIA…
	Clan85	CYP707	Glyma.09G282900.1	MQAIIISFLLIITSLLFSSFFLLLFPFLHCWHHHKHKKLPPGSMGWPYLGETLKLYTQNPNSFFSNRQKRYGDIFKTNILGCPCVMISSPEAARIVLVTQAHLFKPTYPPSKEKLIGPEAVFFQQGAYHSMLKRLVQASFLPSTIKHSVSEVERIVIKMVPTWTYKTINTLQEMKKYAFEVAAISAFGEIKELEMEEIRELYRCLEKGYNSYPLNVPGTSYWKAMKARRHLNESIRRIIERRKESSNYGGGLLGVLLQARGEKNNKYYQQLTDSQVADNLIGVIFAAHDTTASALTWVLKYLHDNANLLEAVTKEQEGIKNKLAMENRGLSWDDTRQMPFTSRVIQETLRSASILSFTFREAVTDVELEGYTIPKGWKVLPLFRSIHHSADFFPQPEKF…
	Clan85	CYP707	Glyma.01G153300.1	MELSTMFCLCASFLFIVLFRALIKPYYVSKRRDLPLPPGSMGWPYIGETFQMYSQDPNVFFASKIKRFGSMFKSHILGCPCVMISSPEAAKFVLNKAQLFKPTFPASKERMLGKQAIFFHQGEYHANLRRLVLRTFMPEAIKNIVPDIESIAQDCLKSWEGRLITTFLEMKTFTFNVALLSIFGKEEILYRDALKRCYYTLEQGYNSMPINVPGTLFHKAMKARKELAQIVAQIISSRRQRKQDFHKDLLGSFMDEKSGLTDEQIADNVIGVIFAARDTTASVLTWIVKYLGENPSVLEAVTEEQECILKSKEESGEDKGLNWEDAKKMPITSRVIQETLRVASILSFTFREAVEDVEYQGYLIPKGWKVLPLFRNIHHSPDNFKEPEKFDPSRFEAAP…
	Clan85	CYP707	Glyma.09G218600.1	MELSTMFFLCASLLFIVLFFRTLIKPYYVSKRRDLPLPPGSMGWPYIGETFQMYSQDPNVFFASKIKRFGSMFKSHILGCPCVMISSPEAAKFVLNKAQLFKPTFPASKERMLGKQAIFFHQGEYHANLRRLVLRTFMPEAIKNIVPDIESIAQDCLKSWEGRLITTFLEMKTFTFNVALLSIFGKEEILYRDALKRCYYTLEQGYNSMPINVPGTLFHKAMKARKELAQIVAQIIWSRRQRKMIDYKDLLGSFMDEKSGLTDDQIADNVIGVIFAARDTTASVLTWIVKYLGENPSVLEAVNEEQECILKSKEERGEDKGLNWEDAKKMPITSRVIQETLRVASILSFTFREAVEDVEYQGYLIPKGWKVLPLFRNIHHSPDNFKEPEKFDPSRFEAA…
	Clan85	CYP707	Glyma.16G076600.1	MELSTIMLCLFASFLSILLFKSLIKPFFFSSKGRQLPLPPGTMGLPYIGETFQMYSQDPNVFFATKIKRYGSMFKSHILGYPCVMISDPEAAKFVLNKAQLFKPTFPASKERMLGKQAIFFHQGAYHANLRKLVLRTFMPEAIKDKVSNIESIALSCLKSWEGKMITTFLEMKTFTFNVALLSIFGKDENLYGEALKRCYCTLERGYNSMPINLPGTLFHKAMKARKELAQILAQIISTRRNMKQDHNNNDLLGSFMSEKAGLTDEQIADNIIGAIFAARDTTATVLTWIVKYLGENPSVLEAVTEEQESLLRGKEESGEKMGLNWSDTKNMPVTSRVIQETLRIASILSFTFREAVEDVEFQGYLIPKRWKVLPLFRNIHHSPDNFKEPEKFDPSRFE…
	Clan85	CYP707	Glyma.16G109300.1	MELSTMLFLFVSFLTILFSKSLIKFFFSSKGRQLPLPPGTMGWPYIGETFQMYSQDPNVFFATKIKRYGSIFKSHILGYPCVMISDPEAAKFVLNKAQLFKPTFPASKERMLGKQAIFFHQGAYHANLRRLVLRTFRPEVIKDKVSYIESIAQSCLKSWEGKMITTFLEMKTFTFNVALLSIFGKDENLYGEDLKRCYYTLERGYNSMPINLPGTLFHKAMKARKELAQILAQIISTRRNMKQDHNDLLGSFMSEEAGLSDEQIADNIIGLIFAARDTTATVLTWIVKYLGENTSVLEAVTEEQESILRAKEESGEEMGLNWSDTKNMPVTSRVIQETLRIASILSFTFREAVEDVEFQGYLIPKGWKVLPLFRNIHHSPDNFKEPEKFDPSRFEVALK…
	Clan85	CYP707	Glyma.17G133900.1	MDLSTVLCLFVSFLSIFLFKSLAKSFLLSFKGKQSPLPPGTMGWPYIGETFRMYSQDPTIFFATKIKRYGSMFKSHILGYPCVMISDSEAAKFILNKDQLFKPTYPASKERMLGKQAIFFHQGAYHANLRRLVLRTVMPETIKDLVSDIESIAQSCLKSCEGKLITTFLEMKTYTLNVALLTIFGRDENLCGEDLKRCYYTIERGYNSMPINLPGTLFHMAMKARKELAQIFTQIISTRRNMKQDHNDLLGLFMSEKSGLTDEQIIDNIVGVIFAARDTTASILTWILKYLDENPCVLEAVTEEQESILRAKEESGEKMDLNWSDTKNMLITTRVIQETLRIASILSFTFREAIEDVEFQGHLIPKGWKVLPLFRIIHHSPDNFKEPEKFDPSRFEVAP…
	Clan85	CYP707	Glyma.02G132200.1	MEIIATIFFCILLIFSSLILSYPLIKKHKKQQHVVAKPKLPPGSMGWPYIGETLQLYSQDPNIFFASKQKRYGEIFKTHILGCPCVMLASPEAARFVLVTHAHLFKPTYPKSKEKLIGTSALFFHQGEYHTRIRKLVQTSLSPETIRKLIPDIETEVVSSLESWVSTGQVINAFQEMKKFSFNIGILSVFGHLEDNYRDQLKENYCIVEKGYNSFPNRIPGTVYSKALLARRRIREIISEIICKRKEQRLMEMDLLGHLLNYKDEKEQTLSDDQIADNVIGVLFAAQDTTASVLTWILKYLHDDQKLLEAIKADQMAVYEANEGGKKPLTWGQTRNMPTTHRVILESLRMSSIISFTFREAVVDVVYKGYLIPKGWKVMPLFRNIHHNPEFHPSPHNFD…
	Clan85	CYP707	Glyma.07G212700.1	MEIIVAIFFCILLFFSSLILSYPLIKKHKKRQHVAKPKLPPGSMGWPYIGETLQLYSQDPNIFFASKQKRYGEIFKTHILGCPCVMLASPEAARFVLVTHAHLFKPTYPKSKEKLIGPSALFFHQGEYHTRIRKLVQTSLSPESIRKLIPDIENEVVSSLELWVSAAGQVINAFQEMKKFSFNIGILSVFGHLEDNYRDQLKENYCIVEKGYNSFPNRIPGTAYSKALLARRRIREIISEIICKRKEQRLMERDLLGHLLNYKDEKGQMLSDDQIADNVIGVLFAAQDTTASVLTWILKYLHDDQKLLEAIKAEQMAVYEANEGGKMPLTWGQTRNMPITHRVILESLRMSSIISFTFREAVVDVVYKGYLIPKGWKVMPLFRNIHHNPEFHPSPQNFD…
	Clan85	CYP716	Glyma.05G220500.1	MDHNNLYLSLLLLFVSFVTLSLFFLFYKHRSPFVAPNLPPGATGYPVIGESLEFLSTGWKGHPEKFIFDRMIRYSSQLFKTSIFGEPAVIFCGATCNKFLFSNENKLVAAWWPNSVNKVFPSTLQSNSKEESKKMRKLLPQFLKPEALQRYVGIMDTIAQNHFASLWDNKTELTVYPLAKRYTFLLACRLFMSVEDVNHVAKFENPFHLLASGIISVPIDLPGTPFNKAIKAANAIRKELLKIIRQRKVDLAEGKASPTQDILSHMLLTCNENGQFMNELDIADKILGLLIGGHDTASAACTFIVKYLAELPHIYDSVYQEQMEIAKSKLPGELLNWDDINRMKYSWNVACEVMRIAPPLQGGFREAINDFIFNGFSIPKGWKLYWSANSTHKNPEYFP…
	Clan85	CYP716	Glyma.08G026900.1	MEDNNLHLSLLLLFVSIVTLSLFVLFYKHRSAFAAPNLPPGATGYPVIGESLEFLSTGWKGHPEKFIFDRMIRYSSQLFKTSILGEPAVIFCGATCNKFLFSNENKLVAAWWPNSVNKVFPTTLLSNSKQESKKMRKLLPQFLKPEALQRYVGIMDTIARNHFASLWDNKTELTVYPLAKRYTFLLACRLFMSIEDVNHVAKFENPFHLLASGIISVPIDLPGTPFNKAIKAANAIRKELLKIIRQRKVDLAEGKASPTQDILSHMLLTCDEKGQFMNELDIADKILGLLIGGHDTASAAITFIVKYLAELPHIYDRVYQEQMEIAKLKSPGELLNWDDVNRMQYSWNVACEVMRIAPPLQGGFREAINDFIFDGFSIPKGWKLYWSANSTHKSPEYFP…
	Clan85	CYP716	Glyma.08G243600.1	MEQLYYLTLVLLFVSFVSVSFFIIFYRHRSPFSVPNLPPGKAGFPVIGESLEFLSAGRKGLPEKFFSDRMTEYSSKVFKTSILGEPTVIFCGAACNKFLFSNENKHVISWWPENVKKLFPTNIQTNSKEEAKKLRNILPQFLSAKAIQRYVGIMDTVAQRHFALEWENNTQVTVLPLAKRYTFGVASRVFMSIDDLNQVAKLAEPLNQVNAGIISMPINFPGTVFNRGIKASKFIRRELLRIVKQRKVELANGMSTPTQDILSHMLIYCDENGQYLAEHDIVNKILGLLIGSHETTSTVCTFVVKYLAELPQNIYENVYQEQMAIAKSKAPGELLNWDDIQKMKYSWNVACEVIRLNPPAQGAFREAINDFIFDGFSIPKGWKLYWSANSTHKNPEYFP…
	Clan85	CYP716	Glyma.05G166900.1	MTLNLMEVTNLVVLPAVSAFFVLCLYFIIKVFRLGKHPNLNLPPGRLGWPVVGETLEFLRTMNEGNVLRFIQERKEKYDSRVFKTSMFGDPVVLFCGPAGNKFLFSNENKNVQVWWPSSVRRLLRLSLVNKVGDEAKMVRRLLMSFLNAETLRNYLPKMDSIAQRHIDTYWEGKEQVCVYPIVQLYTFELACCLFLSIEDSDHISKLSLKFDEFLKGIIGFPLNVPGTRFYRAMKAADVIRKEIKMILKKRKVDLEEKRVSPTQDLLSHMLVTSDPSGRFMTEMEILDNILLLLFAGHDTSRSVLSLVMKYLGQLPQVYEHVLEEQLEISQGKEAGQLLQWEDVQKMKYSWNVASEVMRLSPPVSGAYREAIKDFTYADYNIPKGWKLHWNTGSSHKDP…
	Clan85	CYP716	Glyma.08G125000.1	MEVTNLVVLPAVSAFFVLSLHFITKADRLRKHPNLNLPPGRLGCPIVGETLEFLRTMNEGNVLRFIQERVEKYDARVFKTSMFGDPVVVFCGPAGNKFLFSNENKNVQVWWPSSVRKLLRLSLVNKVGDEAKMVRRLLMSFLNAETLRNYLPKMDSIAQRHIDTYWEGKEQVLVYPIVQLYTFELACCLFLSIEDSDHISKLSLKFDEFLKGIIGLPLNIPGTRFHRAMKAADVIRNEIEMILKKRKVDLEEKRASPTQDLLSHMLVTSDPNGRFMTEMEIIDNILLLLFAGHDSSRSVLSLVMKYLGQLPQVYEHVLKEQLEISQGKEAGQLLQWEDVQKMKYSWNVASEVMRLSPPVSGAYREAIKDFTYGDYNIPKGWKLHWNTGSSHEDPALFSN…
	Clan85	CYP716	Glyma.08G125100.2	MEVTNLVVLPAVLAFFVLCLYFITKVVRLGKHPNLNLPPGRLGWPIVGETFDFMRTMNEGNVLRFIQERVEKYDARVFKTSMFGDPVVVFCGPAGNKFLFSNENKNVQVWWPSSVRKLLRLSLVNKVGDEAKMVRRLLMSFLNAETLRNYLPKMDSIAQRHIDTYWEGKEQVFVYPIVQLYTFELACCLFLSIEDSDHISKLSLKFDEFLKGMIGFPLNIPGTRFHRAMKAADAIRKEIRMILKKRKVDLEEKRASATQDLLSHMLVTSDPSGRFTTEMEIIDNILLLLFAGHDTSRSVLSLVMKYLGQLPHVFEHVLKEQLEISQGKEAGQLLQLEDVQKMKYSWNVASEVMRLSPPVSGAYREAKEDFTYADYNIPKGWKLHWNTGSSHKDPALFSN…
	Clan85	CYP718	Glyma.02G287300.1	MSLNFSKSLIFTSSPMFGDIVYFILWGLFSLLLLLVSFNFLRHKQCYKDKRNLPPGEMGFPLIGETMEFFNAQRRNQLFEEFVHPRILKHGRIFRTRIMGSPTVVVNGAEANKFLLSNEFKLVKSSWPSSSVELMGRDSIMEKDGGRHRFLRGVIGTSLGYAGLELLVPKLCNSVQFHLATNWKGQEKISLYRSTKVLSFSIVFECLLGIKVEPGMLDTFERVLEGVFSPAVMFPGSKFWRAKKARVEIEKMLVKVVREKRREMEGSLGREQDGMLLSKLVSGMIQGEISEKEVIDNVVLLVFAAHDTTSFAVAMTFKMLAQHPDCFGKLLQEHVAIMSNKSRGENLTLEDIKKMKYTWQVARESMRLFPPIFGSFRKAITDIEYEGFIIPRGWKVLWT…
	Clan85	CYP720	Glyma.09G160900.1	MRENISESWLLVMSTVILATAIFAKLFQFKLRTEDKSKCRLPPGRRGWPLIGDSINWYNAVASSHPPQFVEEMVKRYGKIFSCSLFGKWAVVSADPSFNRFVMQNEGKLFKSSYPKSFRDLVGKNGVITVQGDQQRKLHGIASNMMRLEKLKFHFLNDVQKVMLQTLSNFNNNQVILLQDVCRKVAIHLMVNQLLGVSSESQVNEMSQLFSDFVDGCLSIPINIPGYAYHTAMKGREKIIGKINKTIEVHRQNGASIEGNGVLGRLLEEESLPDDAVADFIINLLFAGNETTTKTMLFAVYFLTQCPRAMKQLLDEHDSLRSSNSGDEFLTWQDYKAMTFTQCVIDETLRLGGIAIWLMREAKEDVQYQDFVIPKGCFVVPFLSAVHLDENVYGGALNF…
	Clan85	CYP720	Glyma.16G210300.1	MRENISESWLVMITVILATAIFAKLFQFKLRKEDKSKCRLPPGRRGWPLIGDSINWYNAVASSHPPQFVEEMVKRYGKIFSCSLFGKWAVVSADPSFNRFVMQNEGKLFKSSYPKSFRDLVGKNGVITVQGEQQRKLHGIASNMMRLEKLKFHFLNDVQKVMLQTLSNFNNNQVILLQDVCRKVAIHLMVNQLLGVSSESQVNEMAQLFSGFVDGCLSIPINIPGYAYHTAMKAREKIISKINRTIEVHRQNGASIEGNGVLGRLLEEESLPDDAVADFIINLLFAGNETTTKTMLFAVYFLTQCPRAMKQLLDEHDSLRSNSGDKFLTWQDYKAMSFTQCVIDETLRLGGIAIWLMREAKEDVQYQDFVIPKGCFVVPFLSAVHLDENVYSGALNFNP…
	Clan85	CYP722	Glyma.04G030100.2	MLSHLVKEHPYYIICCYVGLLLLFLLVCWALWCKNKSSIGIPPGNRGLPFVGETLQFMAAINSSKGVYEFVHARRLRYGKCFKAKLFGETHVFISSRESAKVIVNKENEGGKFSKSYIKSIAELLGRDSLLCAAQQHHKLIRARLFSLFSTDSLSSFVQLFDSLVLQATRTWTCGSVVVIQDETLKLACKAMCKMLISIESGQELVTMHNEVARLCEAMLALPVRLPWTRFYKGLQARKRIMNILEKNISERRSGIATHHVDFLQQLLDNKLNEDGVPGLTDREIKDNILTMIIAGQDTIANAMTWMIKFVDENRQVFNTLMKEQLKIEKNGSRNSYLTLEALNEMPYASKVVKEALRKASVVQWLPRVALEDCVIEGFKIKKGWNINIDARSIHHDPT…
	Clan85	CYP722	Glyma.04G030100.3	MLSHLVKEHPYYIICCYVGLLLLFLLVCWALWCKNKSSIGIPPGNRGLPFVGETLQFMAAINSSKGVYEFVHARRLRYGKCFKAKLFGETHVFISSRESAKVIVNKENEGGKFSKSYIKSIAELLGRDSLLCAAQQHHKLIRARLFSLFSTDSLSSFVQLFDSLVLQATRTWTCGSVVVIQDETLKLACKAMCKMLISIESGQELVTMHNEVARLCEAMLALPVRLPWTRFYKGLQARKRIMNILEKNISERRSGIATHHVDFLQQLLDNKLNEDGVPGLTDREIKDNILTMIIAGQDTIANAMTWMIKFVDENRQVFNTLMKEQLKIEKNGSRNSYLTLEALNEMPYASKVVKEALRKASVVQWLPRVALEDCVIEGFKIKKGWNINIDARSIHHDPT…
	Clan85	CYP722	Glyma.04G030100.4	MLSHLVKEHPYYIICCYVGLLLLFLLVCWALWCKNKSSIGIPPGNRGLPFVGETLQFMAAINSSKGVYEFVHARRLRYGKCFKAKLFGETHVFISSRESAKVIVNKENEGGKFSKSYIKSIAELLGRDSLLCAAQQHHKLIRARLFSLFSTDSLSSFVQLFDSLVLQATRTWTCGSVVVIQDETLKLACKAMCKMLISIESGQELVTMHNEVARLCEAMLALPVRLPWTRFYKGLQARKRIMNILEKNISERRSGIATHHVDFLQQLLDNKLNEDGVPGLTDREIKDNILTMIIAGQDTIANAMTWMIKFVDENRQVFNTLMKEQLKIEKNGSRNSYLTLEALNEMPYASKVVKEALRKASVVQWLPRVALEDCVIEGFKIKKGWNINIDARSIHHDPT…
	Clan85	CYP722	Glyma.16G133800.1	MLNLLREEVLLVVQKYYYDLIMVALFTIGVTYLASKAWKRATTNNREEIPGRLGLPFIGETFSFLSATNSTRGCYDFVRLRRLWNGRWFKTRLFGKIHIFIPSPEGARTIFANDFVLFNKGYVKSMADAVGQKSLLCVPVESHKRIRGLLSEPFSMTSLSAFVTKFDKMLCGRLQKLEESGKSFKVLDLCMKMTFDAMCDMLMSITEDSLLRQIEEDCTAVSDAMLSIPIMIPRTRYYKGITARKRVMETFGEIIARRRRGEETPEDFLQSMLQRDSLPASEKLDDSEIMDNLLTLIIAGQTTTAAAMMWSVKFLHDNRETQDILREEQLSITKMKPEGASINHEDLNSMRYGLKVVKETLRMSNVLLWFPRVALEDCTIEGYDIKKGWHVNIDATHIH…
	Clan85	CYP724	Glyma.16G068100.1	MVELLAVICTLFSALAFVYLLKYRNKNKQDSPHKLPPGSMGWPFSGETLGFLKPHRSNSLGSFLQERCSRYGKVFKSHLFGSPTIVSCDFEFNMYILQNEGTLFPVDYPKVMHNILGKFSLLLVKGDLHRKLRSTIISFVSATKHESNFLHCVEMLALSRINSWIPISKQVAFYEEAKRFTINVMMKHLLNINPDDPLAFKILGNFENYIKGFISLPIRIPGTAYFKALQARIRLSAIIKDIIIERRKCNNVRPMQGGDLLNVILSKKNLSDEEMVSIVLDLLFGGYETTAKLLSLIVYFLGGASNALESLKEEHQEIRKRKKEGELLNWEDYKQMNFTQNVIYEAMRCGNVVKFLHRKAIQDVKFKDYVIPAGWKVLPVLSSGHLDPTLFENPLEFNP…
	Clan85	CYP724	Glyma.16G068100.2	MVELLAVICTLFSALAFVYLLKYRNKNKQDSPHKLPPGSMGWPFSGETLGFLKPHRSNSLGSFLQERCSRYGKVFKSHLFGSPTIVSCDFEFNMYILQNEGTLFPVDYPKVMHNILGKFSLLLVKGDLHRKLRSTIISFVSATKHESNFLHCVEMLALSRINSWIPISKQVAFYEEAKRFTINVMMKHLLNINPDDPLAFKILGNFENYIKGFISLPIRIPGTAYFKALQARIRLSAIIKDIIIERRKCNNVRPMQGGDLLNVILSKKNLSDEEMVSIVLDLLFGGYETTAKLLSLIVYFLGGASNALESLKVIYEAMRCGNVVKFLHRKAIQDVKFKDYVIPAGWKVLPVLSSGHLDPTLFENPLEFNPFRWNDNSTSKKVAPFGGGPRFCPGADLAK…
	Clan85	CYP728	Glyma.02G290000.1	MSLLLLSFLLIIPILLLLRRKRKPSKRVPPGSLGIPVVGQSLGLLRAMRANTAEKWVQERINKYGPISKLSLFGKPTVLIHGQAANKFIFSGGGNAIANQQTQSIKMILGDRNLLELTGEDHSRVRGALVPFLKPESLKRYVGKMDEEVRKHLEMHWQGKQQIKVLPLMKTLTFNIICSLLFGVERGKQRDQFLDSFQEMIQGMWSVPINVPFTRYNRSLRASARIQNILKEIVQKKKIELKQNAASARQDLISFLLGMVDEDGKQVMSEKEIFHNIKLVMVAGHDTSAVLITFIIRLLANEPAIYAAVLQEQEEIAKGKLSGEALTWEDLSKMKYTWRVAMETIRMFPPIFGGFRKAATDIEYDGYFIPKGWQIFWVTAMTHMDENIFPEPSKIDPSR…
	Clan85	CYP728	Glyma.18G052400.1	MVYGILFFVLFAFTLSLAFLLSKCLSKSQTKNVPKGSLGYPIIGETLSFLKAQRQDKGSVWLEERISKYGPIFKTSLMGFPTVFVIGQEGNKFVLGSPDDLLSSKKPLTLRKILGRQSLVELTGPRYRLVKGEMLKFLKPECLQNYVKEMDELVNATLLREFRENEIIRAVVFMKKLSYEIACNLLFDIKDEHTKEALFVDFTLAFKAIHSLPINLPGTTFWRGQRARARIVDRMIPILNKRREELSKGVLSSTNDMLSCLLALRDENHQPLDDDLITDNFIFLFVASHDTSATLMSLMIWKLSRDQEVYNKVLEEQMEIIKQREGTEERLTWAEIQKMKYTWRVAQELMRMIPPLFGSFRKALKDTNYKGYDIPKGWQVYWAAYGTHMNDDIFENPHK…
	Clan85	CYP733	Glyma.02G083200.1	MELIMLLLSLVLSLLVLSVILLLYVTRSPKAMEGIPGSLGWPIVGESFSFLSDFSSPSGIFSFMNKRQKRYGKVFKSFVLGRFTVFMTGREASKILLTGKDGIVSLNLFYTGQQVLGPTSLLQTTGEAHKRLRRLIGEPLSIDGLKKYFHFINTQAMETLDQWDGRKVLVLEEASTFTLKVIGHMIMSLEPSGEEQEKFRSNFKIISSSFASLPFKLPGTAFHRGIKARDRMYEMLDSTISRRRSGQEFQQDFLGSLVMKHSKEDGEEDENKLTDKQLKDNILTLLVAGHDTTTAALTWLIKFLGENPLVLEQLREEHRQIVANRKSGTDLTWAEVNNMPYTAKVISETLRRATILPWFSRKASQDFEIDGYKIKKGWSVNLDVVSIHHDPEVFQDPEK…
	Clan85	CYP733	Glyma.16G168900.1	MEGIPGSLGWPIVGESFSFLSDFSKITLSMSYDFNLSNLYGCCFSPSNKNIYGKVFKSFVRGRFTVFMTGREASKILLTGKDGIVSLNLFYTGQQVLGPTTLLQTTGEAHKRLRRLIGEPLSIDGLKKYFHFINTQAMETLGQWQGRKVLVLEEASTFTLKVIGHMIMSLEPSGEEQEKFRSNFKIISSSFASLPFKLPGTAFHHGIKARDRMYEMLDSTISRRRSGQEFQQDFLGSLDNILTLLVAGHDTTTAALTWLIKFLGENPIEEHRQIVINRKSGTDLTWAEVNNMPYTAKVISETLRRATILPWFSRKASQDFEIDGYKIKKGWSVNLNVVSIHHDPEVFPDPEKFDPSRFDETLRPFSFLGFGSGPRMCPGMNLAKLEICVFIHHLVNRYN…
	Clan85	CYP733	Glyma.16G168600.1	MELIILLLSLILSSLVLMVLFLLCVTRSPKAMEGIPGSLGWPIVGESFSFLSDFSSPSGIFSFMNKRQKRYGKVFKSFVLGRFTVFMTGREASKILLTGKDGIVSLNLFYTGQQVLGPTSLLQTTGEAHKRLRRLIGEPLSIDGLKKYFHFINTQAMETLDQWQGRKVLVLEEASTFTLKVIGHMIMSLEPSGEEQEKFRSNFKIISSSFASLPFKLPGTAFHRGIKARDRMYEMLDSTISRRRSGQEFQQDFLGSLVMKHSKEDGEEDENKLTDKQLKDNILTLLVAGHDTTTAALTWLIKFLGENPIVLEQLRVISETLRRATILPWFSRKASQDFEIDGYKIKKGWSVNLDVVSIHHDPEVFSDPEKFDPSRFDETLRPFSFLGFGSGPRMCPGMN…
	Clan85	CYP85	Glyma.02G120700.1	MLTVFYYALALTFCAFFALLKWNSLRYSRKGMPPGSLGWPFVGETLKFLTQGPDFMKESRSRYGNLFKTHALGCPIVVSMDPDVNRYILLNEAKGLVPGYPDSMRKILGTNIAEVHGAIHKRIRGSLLSLIGPIAVKDRLLPEVDEFMRSYLDNWGGKVIDLQEKTVEMAFFISMKAVVENEPNSFVESFKATFDSMALGTISLPIKIPGTQYYRGLKAREKVVTMLRELLAKRRASSATHDDILDHLMRNEDGKHKLDDEEIIEQIITILYSGYETVSTTTMMAIKYLCDNPSVLQAIRDEHFAIQQKKMPEERISWDDYKNMSLTRAVILETMRLASVVAGVMRRTTTNDIELNGFIIPKGWRVYVYTRETNFDPFIYEEPFTFNPWRWVEKKDLES…
	Clan85	CYP85	Glyma.08G250000.1	MALFIVVLVVVALVLCFCTALLKWNEVRYRRKGLPQGTMGWPVFGETTEFLKQGPNFMKNKRARYGSFFKSHILGCPTIVSMDPELNRYILMNEAKGLVPGYPQSMLDILGTRNIAAVHGSTHKYMRGALLSIISPTLIRDLLLPKIDEFMRTHLSDWENKVINIQEKTKEMAFLSSLKQISGMESSSISQPFMTEFFKLVLGTLSLPINLPGTNYCRGLQARKSIISILSQLLEERKLSQEAHVDMLGCLMNREENRYKLTDEEIIDLIITIMYSGYETVSTTSMMALKYLHDHPKVLEEIRKEHFAIRERKKPEDPIDGNDLKSMRFTRAVIFETSRLATTVNGVLRKTTHDMELNGYLIPKGWRIYVYTREINYDPFLYHDPLAFNPWRWLGNSLE…
	Clan85	CYP85	Glyma.13G052900.3	MCVCVHSFGDYNRRGCTFFLKSLWVGFGVGAPMALLMTIVVGVVLLLCFCSALLRWNEVRYRKKGLPPGTMGWPLFGETTEFLKQGPNFMKTQRSRYGSFFKSHILGCPTIVSMDPELNRYILMNEAKGLVPGYPQSMLDILGKCNIAAVHGSTHKYMRGALLSIISPTLIRDQLLQKIDQFMRAHLSNWDDKVINIQEKTKEMAFLSSLKQIAGMESGSLSDSLMAEFFKLVLGTLSLPINLPSTNYHHGFQARKTIVKILSKLLEERRASHETYHDMLGCLMGRDESRYKLSDEEIIDLVITITYSGYETVSTTSMMAVKYLHDHPKALEELRKEHLAIRERKKPDEPLDCNDLKSMKFTRAVIFETSRLATIVNGVLRKTTQDMELNGYLIPKGWR…
	Clan85	CYP85	Glyma.18G272300.1	MALFMAVLGVVALVLCFCSALLKWNELRYRRKGLPQGTMGWPVFGETTEFLKQGPSFMKNKRARYGSFFKSHILGCPTIVSMDPELNRYILMNEAKGLVPGYPQSMLDILGTRNIAAVHGSTHKYMRGALLSIISPTLIRDQLLPKIDEFMRTHLSDWDNKVINIQEKTKEMAFLSSLKQISGMESSSISQPFMTEFFKLVLGTLSLPINLPGTNYRRGLQARKSIVSILSQLLEERKTSQKGHVDMLGCLMNKDENRYKLTDEEIIDLIITIMYSGYETVSTTSMMAVKYLHDHPKVLEEIRKEHFAIRERKNPEDPIDCNDLKSMRFTRAVIFETSRLATIVNGVLRKTTHDMELNGYLIPKGWRIYVYTREINYDPFLYHDPLTFNPWRWLGNSLE…
	Clan85	CYP85	Glyma.19G033900.1	MAFLMAIVVVGVVLVLCFCSALLRWNEVRYRKKGLPPGTMGWPLFGETTEFLKQGPNFMKTQRARYGSFFKSHILGCPTIVSMDPELNRYILMNEAKGLVPGYPQSMLDILGKCNIAAVHGSTHKYMRGALLSIISPTLIRDQLLPKIDQFMRAHLSNWGDKVINIQEKTKEMAFLSSLKQIAGMESGSLSDSFMAEFFKLVLGTLSLPIDLPGTNYHSGFQARKTIVNILSKLLEERRASHETYHDMLGCLMGRDESRYKLSDEEIIDLVITIMYSGYETVSTTSMMAVKYLHDHPKALEELRKEHLAIRERKKPDEPLDCNDLKSMRFTRAVIFETSRLATIVNGVLRKTTQDMELNGYLIPKGWRIYVYTREINYDPFLYPDPLTFNPWRWMDKSL…
	Clan85	CYP87	Glyma.01G216900.1	MWALFLGALVIIGITHWVYRWRNPSCNGKLPPGSMGFPLLGETLQFFSPNTNSGIPPFIKQRMKRYGPIFKTNLVGRPVVVSTDPDLNHFIFQQEGQVFQSWYPDTFTEIFGRQNVGSLHGFMYKYLKNMVLNLFGPESLKKMLPELEQTTCRTLEQWSCENSVELKEATARMIFDLTAKKLISYDSTKSSENLRENFVAFIQGLISFPLDIPGTAYHKCLQGRKRAMKMLKNMLQERRRMQRKEQTDFFDYVVEELKKEGTILTEAIALDLMFVLLFASFETTSLALTYAIKLLSDNPVVLKRLQEEHEAILKQREDPNSGVTWKEYKSMTFTFQFINETVRLANIVPGIFRKALREINFKGYTIPAGWAVMVCPPAVHLNPAKYHDPLAFNPWRWEG…
	Clan85	CYP87	Glyma.11G026200.1	MWALCLGALVIIGITHWVYRWRNPSCNGKLPPGSMGFPLLGESLQFFSPNTTSGIPPFIKQRMKRYGPIFKTNLVGRPVVVSTDPDLNHFIFQQEGKVFQSWYPDTFTEIFGKQNVGSLHGFMYKYLKNMVLNLFGHESLKKMLPELEQTTCRTLEQWSCEDSVELKEATARMIFDLTAKKLISYDSTKSSENLRDNFVAFIQGLISFPLDIQGTAYHKCLQGRKRAMKMLKNMLQERRRMQRKQQTDFFDYIVEELKKEGTILTEAIALDLMFVLLFASFETTSLALTYAIKLLSDNPLVLKRLQEEHEAILKQREDPNSGITWKEYKSMTFTFQFINETVRLANIVPGIFRKALREINFKGYTIPAGWAVMVCPPAVHLNPDKYQDPLAFNPWRWEG…
	Clan85	CYP88	Glyma.09G029400.1	MIMMMMMCSMWMWVVLVAIAGALLVLRSILKNVNWWLYESKLGVKQYSLPPGDMGWPFIGNMWSFLSAFKSKDPDSFISSFVSRFGRTGMYKTMMFGNPSIIVTTPEICKRVLTDDDKFTPGWPQSTIELIGKRSFISMSYEEHKRLRRLTSSSINGMEALSLYLTYIEKNVKSSLEKWANMGQIEFLTEIRKLTFKIIMHIFLSSESEHVMEALEREYTALNHGVRAMCINIPGFAYHKAFKARKNLVAIFQSIVDERRNLRKGYLPGKAKDMMDALIDLEDDERKLSDEDIIDIMLMYLNAGHESSGHITMWATFFLQKHPEYLQKAKAEQEEIIRRRPSTQKGLTLKEVREMDFLYKVIDETLRVITFSLVVFREAKTDVNINGYTVPKGWKVLVW…
	Clan85	CYP88	Glyma.15G135200.1	MMEMDSMCMWVVLVAIAGALLVLRSMLKNVNWWLYESKLGVKQYSLPPGDMGWPFIGNMWSFLRAFKSKDPDSFISSFVSRYGRTGMYKTLMFGNPSVIVTTPETCKRVLTDDDKFTTGWPQSTIELIGKRSFISMSYEEHKRLRRLTSSSINGMESLSLYLTYIEENVKNSLEKWANMGQIEFLTEIRKLTFKIIMHIFLSSESEPVMEALEREYTALNHGVRAMCINIPGFAYHKAFKARKNLVAIFQSIVDERRNLRKGYLPGKAKDMMDALIDVEDDDGRKLSDEDIIDIMLMYLNAGHESSGHITMWATFFLQKHPEYLQKAKAEQEEIIRRRPPTQKGLTLKEVREMDFLYKVIDETLRVITFSLVVFREAKSDVNINGYTIPKGWKALVWFR…
	Clan85	CYP90	Glyma.02G256800.1	MASFIFTPVLFLLIISAVLLFLHRRSRCRRFRLPPGTLGLPFVGETLQLISAYKSDNPEPFMDQRVKRYGPIFTTHVFGEPTVFSTDPETNRFILLNEGKLFECSYPGSISNLLGKHSLLLMKGSLHKRMHSLTMSFANSSIIKDHLLVDIDRLIRLNLDSWSDRVLLMEEAKKITFELTVKQLMSFDPGEWTETLRKEYVLVIEGFFSVPLPLFSSTYRRAIKARTKVAEALTLVVRDRRKESVTEEKKNDMLGALLASGYHFSDEEIVDFMLALLVAGYETTSTIMTLAIKFLTETPLALAQLKEEHDQIRAKKSCPEAPLEWTDYKSMAFTQCVVNETLRVANIIGAIFRRAMTDINIKGYTIPKGWRVVASFRAVHLNPDHFKDARTFNPWRWQS…
	Clan85	CYP90	Glyma.11G228900.1	MASLPTLLSFAVIFFTVALLYLRRVFRRRQFRLPPGSHGLPLIGETLQLISAYKSDNPEPFIDERVERYGSIFTTHVFGEPTVFSADPEVNRFILQNEGKLLDCSYPGSISNLLGKHSLLLMKGALHKRMHSLTMSFANSSIIKDHLLHHIDRLICLNLDAWSDTVFLMDQAKKITFELTVKQLMSFDPDEWTENLRKEYVLVIEGFFTLPFPLFSTTYRRAIKARTKVAEALALVVRQRRKEYGENKEKKSDMLGALLASGDHLSDEEIVDFLLALLVAGYETTSTIMTLAIKFLTETPLALAQLKEEHDQIRAKSHPGAPLEWTDYKSMAFTQCVVNETLRVANIIGGIFRRATTDINIKGYTIPKGWKVFASFRAVHLNPEHYKDARSFNPWRWQS…
	Clan85	CYP90	Glyma.14G059900.1	MASFIIIPLLLLFISAVHLFLHRRSRCRRLRLPPGTLGLPFVGETLQLISAYKSDNPEPFMDQRVKRYGPIFTTHVFGEPTVFSADPETNRFILLNEGKLFECSYPGSISNLLGKHSLLLMKGSLHKRMHSLTMSFANSSIIKDHLLVDIDRLIRLNLDSWSDRILLMEEAKKITFELTVKQLMSFDPGEWTETLRKEYVLVIEGFFSVPLPLFSSTYRRAIKARTKVAEALTLVVRERRKESVMGEKKNDMLGALLASGYHFSDEEIVDFMLALLVAGYETTSTIMTLAVKFLTETPLALAQLKEEHDQIRAKKSCPEAPLEWTDYKSMAFTQCVVNETLRVANIIGAIFRRAMTDINIKGYTIPKGWRVVASFRAVHLNPDHYKDARTFNPWRWQSN…
	Clan85	CYP90	Glyma.14G059900.2	MASFIIIPLLLLFISAVHLFLHRRSRCRRLRLPPGTLGLPFVGETLQLISAYKSDNPEPFMDQRVKRYGPIFTTHVFGEPTVFSADPETNRFILLNEGKLFECSYPGSISNLLGKHSLLLMKGSLHKRMHSLTMSFANSSIIKDHLLVDIDRLIRLNLDSWSDRILLMEEAKKITFELTVKQLMSFDPGEWTETLRKEYVLVIEGFFSVPLPLFSSTYRRAIKARTKVAEALTLVVRERRKESVMGEKKNDMLGALLASGYHFSDEEIVDFMLALLVAGYETTSTIMTLAVKFLTETPLALAQLKEEHDQIRAKKSCPEAPLEWTDYKSMAFTQCVVNETLRVANIIGAIFRRAMTDINIKGYTIPKGWRVVASFRAVHLNPDHYKDARTFNPWRWQSN…
	Clan85	CYP90	Glyma.18G028300.1	MASLPALPTLLLSFAAIFFTVLLLLLFLRRRQLRLPPGSYGLPLIGETLQLISAYKSDNPEPFIDERVERYGSIFTTHVFGEATVFSADPEVNRFILQNEGRLLDCSYPGSISNLLGKHSLLLMKGGLHKRMHSLTMSLANSSIIKDHLLHHIDRLVCLNLDAWSNRVFLMDQAKKITFELTVKQLMSFDPDEWTENLRKEYVLVIEGFFTLPFPLFSTTYRRAIKARTKVAEALTLVVRQRRKEYDEDKEKKNDMLGALLASGDHFSDEEIVDFLLALLVAGYETTSTIMTLAIKFLTETPLALAQLKEEHDQIRARSDPGTPLEWTDYKSMAFTQCVVNETLRVANIIGGIFRRARTDIDIKGYTIPKGWKVFASFRAVHLNPEHYKDARSFNPWRW…
	Clan85	CYP90	Glyma.01G175500.1	MSDSLLTFYSLSAILALLPIFIFILIKRKQSKPRLNLPPGNMGWPFLGETIGYLKPYSATTIGEFMEQHIARYGTIYKSKLFGEPAIVSADAGLNRFILQNEGKLFECSYPRSIGGILGKWSMLVLVGDMHRDMRVISLNFLSHARLRTHLLKEVEKQSLLVLNSWSQNSIFSAQDEAKKFTFNLMAKHIMSMDPGDIETEQLKKEYVTFMKGVVSAPLNLPGTAYRKALKSRSIILKFIEGKMEERVRRIQEGNESLEEDDLLNWVLKHSNLSTEQILDLILSLLFAGHETSSVAIALAIYFLPGSPQAIQQLREEHREIARAKKQTGEVELTWDDYKRMEFTHCVVNETLRLGNVVRFLHRKAVKDVSYKGYDIPCGWKVLPVIAAVHLDPSLFDQP…
	Clan85	CYP90	Glyma.02G057500.1	MSDSHLITFCFLSCSILALILITFIFTRRKKPKFNLPPGQMGWPLLGETIGYLNPYPAVTLGEFMENHIARYGKIYKSNLFGGPAIVSADAGLNRFILQNDGKLFEISYPKSIRDILGKWSMLVLVGDMHKEMRNISLNFLSNAKLRTHLVKEVERHALLVINSWNNNSTFSALQEAKKFTFNFMAKRIMSLEPGNPETGQLRREYVSFMKGVVSTAPLNLPGTAYRKALKSRGAVKKIIEGKMEERNKRIQKGNASLEEDHDLLSWVMTHTNLSNEQILDLVLSLLFAGHETSSVAIALAIYFLPGCPRAIQQLREEHVEIVTSKKQTGEVELTWDDYKRMEFTHCVVNETLRLGNVVRFIHRKAIKDVHYKGYDIPCGWKVLPVVSAVHLDPALFDQ…
	Clan85	CYP90	Glyma.02G057500.2	MSDSHLITFCFLSCSILALILITFIFTRRKKPKFNLPPGQMGWPLLGETIGYLNPYPAVTLGEFMENHIARYGKIYKSNLFGGPAIVSADAGLNRFILQNDGKLFEISYPKSIRDILGKWSMLVLVGDMHKEMRNISLNFLSNAKLRTHLVKEVERHALLVINSWNNNSTFSALQEAKKFTFNFMAKRIMSLEPGNPETGQLRREYVSFMKGVVSTAPLNLPGTAYRKALKSRGAVKKIIEGKMEERNKRIQKGNASLEEDHDLLSWVMTHTNLSNEQILDLVLSLLFAGHETSSVAIALAIYFLPGCPRAIQQLREEHVEIVTSKKQTGEVELTWDDYKRMEFTHCVVNETLRLGNVVRFIHRKAIKDVHYKGYDIPCGWKVLPVVSAVHLDPALFDQ…
	Clan85	CYP90	Glyma.11G067700.1	MSDSLLTFHSLSTILALLPIFIFILIKRKQSKPRLNLPPGNMGWPFLGETIGYLKPYSATTIGEFMEQHIARYGTIYKSKLFGEPAIVSADAGLNRFILQNEGKLFECSYPRSIGGILGKWSMLVLVGDMHRDMRVISLNFLSHARLRTHLLKEVEKQSLLVLNTWNQNSTFSAQDEAKKFTFNLMAKHIMSMDPGDIETEHLKKEYVTFMKGVVSAPLNLPGTAYRKALKSRSIILKFIEGKMEERVRRIQEGNESLEEDDLLNWVLKNSNLSTEQILDLILSLLFAGHETSSVAIALAIYFLPGCPQAIQQLKEEHREIARAKKQAGEVELTWDDYKRMEFTHCVVNETLRLGNVVRFLHRKAVKDVNYKGYDIPCGWKVLPVIAAVHLDPSLFDQP…
	Clan85	CYP90	Glyma.02G051600.1	MEWIIGLWTLMGFLLCWWFLCVRKENQNSKVKKKKGKVPKGNTGWPLLGETLEFIACGYTSNPVSFMEKRKSLYGSVFKTSILGTGVIVSTDPEVNKVILQNQGNIFVPAYPKSVRELMGEHSILQMNGNMHRKIHSLLGGFLRSPQFKARITRDIEHSVKQCFATWTHQPIIYLQDQVKKITFTILVKVLLSIGPGEDLDFLKREFEEFIKGLICLPLKIPGTRLYKSLKAKERMMKIVRRVIEERINNMRNNNNSNNKDSANDVVDVLLRDIGDTNSISNMLENICENIIEMMIPGEETLPTAMTMSVKFLSNYPVALSKLLEENMELKRRKNNSDDYAWNDYLSLPFTQNVISESLRMANIVNAIWRKAVKDVDIKGYLIPKDWCVVASLTSVHMD…
	Clan85	CYP90	Glyma.11G073300.1	MEWIIGVCVSMGMLFLMSWWILLCGKNDDEKTVAKGKVPKGNSGWPLLGETLDFIASGYTSTPVSFLEKRKSLYGNVFKTCILGSNVIVSTDPDVNKVVLQNQANNFVPAYPKSIRELMGEQSILKMNGTMHKKVHTLIAGFLRSPQLKARITRDIEHTVKQCFASWTPHQPIYVQDQVKKITFPVLIKVLMSVGPGEDLDFLYREFAEFIKGLICLPLKFPGTRLYKSLKAKDRMVKMVRNIVEERKKLQKDNNADDHGDTVAVAVNDVVDVLLRDKVDSNSSSRLTPEMISQNIIEMMVPGEETLPTAMTIALKFLSDSPLALSKLQEENMELKRLKTNCSDDYAWTDYMSLPFTQNVISETLRMANIVNGIWRKSVNDIEIKGYLIPKHWCVMASL…
	Clan85	CYP90	Glyma.07G010700.1	MDNIWIVFVTVFLLCTVILYRNRLSLMLKSKRKNKLPLGTLGWPFIGETVEFVSCAYSDRPESFMDKRRRMYGKVFKSHIFGSPTIVSTDADVNKFILQSDAKVFVPSYPKSLTELMGESSILLINGSLQRRIHGLIGAFFKSQQLKAQITRDMQKYAQESMASWREDCPIYIQDETKKIAFHVLVKALISLDPGEEMELLKKHFQKFISGLMSLPIKLPGTKLYQSLQAKKTMVKLVKRIILAKRNSGICKVPEDVVDVLLSDVSEKLTDDLIADNIIDMMIPGEDSVPLLMTLATKYLSECPAALQQLTEENMKLKKLQDQDGESLSWTDYLSLPFTQTVISETLRMGNIIIGVMRKALKDVEIKGHLIPKGWCVFANFRSVHLDDKNYECPYQFNP…
	Clan85	CYP90	Glyma.08G193900.1	MDNIWIVFVTVFLLCTVILYRNRLSLMLKSKRKKNKLPLGTLGWPFIGETIEFVSCAYSDRPESFMDKRRRMYGKVFKSHIFGSPTIVSTDASVNKFILQSDAKVFVPSYPKSLTELMGESSILLINGSLQRRIHGLIGAFFKSQQLKAQITRDMQKYVKESMASWREDCPIYIQDETKKIAFHVLVKALISLDPGEEMELLKKHFQEFISGLMSLPIKLPGTKLYQSLQAKKKMVKLVKRIILAKRSSGFCKVPKDVVDVLLSDANEKLTDDLIADNIIDMMIPGEDSVPLLMTLATKYLSECPAALQQLTEENMKLKKIQDQVGESLSWSDYLSLPFTQTVITETLRMGNIIIGVMRKALKDVEIKGHLIPKGWCVFVNFRSVHLDDKNYECPYQFN…
	Clan85	CYP90	Glyma.08G193900.2	MLKSKRKKNKLPLGTLGWPFIGETIEFVSCAYSDRPESFMDKRRRMYGKVFKSHIFGSPTIVSTDASVNKFILQSDAKVFVPSYPKSLTELMGESSILLINGSLQRRIHGLIGAFFKSQQLKAQITRDMQKYVKESMASWREDCPIYIQDETKKIAFHVLVKALISLDPGEEMELLKKHFQEFISGLMSLPIKLPGTKLYQSLQAKKKMVKLVKRIILAKRSSGFCKVPKDVVDVLLSDANEKLTDDLIADNIIDMMIPGEDSVPLLMTLATKYLSECPAALQQLTEENMKLKKIQDQVGESLSWSDYLSLPFTQTVITETLRMGNIIIGVMRKALKDVEIKGHLIPKGWCVFVNFRSVHLDDKNYECPYQFNPWRWQDKDTSSCNFTPFGGGQRLCPG…
	Clan86	CYP704	Glyma.03G020400.1	MDFLHTLLSLIAFSFLGIFLVFCFIMLTIIIGKSIGDPDYAPVKGTVFNQLLYFNTLHDYHAQVAKTNPTFRLLAPDQSELYTADPRNIEHILKTNFDKYSKGKYNQDIVTDLFGEGIFAVDGDKWRQQRKLASFEFSTRVLRDFSCSVFRRNAAKLVRVISEFSHQGQVFDMQDILMRCTLDSIFKVGFGTELNCLDGSSKEGSEFMKAFDESNALIYWRYVDPFWKLKRFLNIGCEATLKRNVKIIDDFVHGVIKTRKAQLALQQEYNVKEDILSRFLIESKKDQKTMTDQYLRDIILNFMIAGKDTSANTLSWFFYMLCKNPLIEEKIVQEVRDVSCSCSHESEPNIEEFVAKITDDTLDRMHYLHAALTETLRLYPAVPADGRTAEAHDILPDGH…
	Clan86	CYP704	Glyma.03G021600.1	MDFLHTLLSLIAFSFLGIFLVFCFIMLTIIIGKSIGDPDYAPVKGTVFNQLLYFNTLHDYQAQLAKTNPTFRLLAPDQSELYTADPRNVEHILKTNFDKYSKGKYNQDIMTDLFGEGIFAVDGDKWRQQRKLASFEFSTRVLRDFSCSVFRRNAAKLVRVISEFSHQGQVFDMQDILMRCTLDSIFKVGFGTELNCLDGSSKEGSEFMKAFDESNALIYWRYVDPFWKLKRFLNIGCEATLKRNVKIIDDFVHGVIKTRKAQLALQQEYNVKEDILSRFLIESKKDQKTMTDQYLRDIILNFMIAGKDTSANTLSWFFYMLCKNPLIEEKIVQEVRDVTCSCSHESEPNIEEFVAKITDDTLDRMHYLHAALTETLRLYPAVPADGRSAEAHDILPDGH…
	Clan86	CYP704	Glyma.07G083200.1	MPSLTFLSNPYFFAALSASLTLLMVQVLFRKLNKRHSKKKYHAVAGTIFNQMLNFNRLHHYMTYLAAKHRTYRLFNPFRYEVYTSEPTNVEYILKTNFENYGKGLYNYHNLKDLVGDGIFAVDGKKWREQRKLLSHEFSTKMLRDFSISIFRKNAAKLANIVSEAATSNNTLEIQDLLMKSTLDSIFHVAFGTELDSMCGSNQEGKIFADAFDTSSALTLYRYVDVFWKIKKFLNIGSEARLKKNTEVVMEFFFKLINTRIQQMQTSNVDTDGKREDILSRFLQVKGSDSTYLRDIILNFVVAGRDTTAGTLSWFMYMLCKYPSVQEKAAEEVKEATNTETITSYTEFVSTVTDEALEKMNYLHAAITETLRLYPVIPVDAKICFSDDTLPDGYSVNKG…
	Clan86	CYP704	Glyma.07G083300.1	MPSFMAFLSHPYFFAALSASLTLLVVQLLFRKLNKRHSRKKYHPVAGTIFNQMLNFNRLHHYMTDLAAKHRTYRLLNPFRYEVYTTEPTNVEYILKTNFENYGKGLYNYHNLKDLLGDGIFTVDGEKWREQRKISSHEFSTKMLRDFSISIFRKNVVKLVNIVSEAATSNSTLEIQDLLMKSTLDSIFQVAFGTELDSMCGSSQEGKIFADAFDTSSALTLYRYVDVFWKIKKFLNIGSEAKLRKTTEILNEFVFKLINTRILQMQISKGDSGSKRGDILSRFLQVKEYDPTYLRDIILNFVIAGKDTTAATLSWFMYMLCKYPEVQEKAAEEVKEATNTKRISSYNEFVYSVTDEALERMNYLHAAITETLRLYPAVPVDAKICFSDDTLPDGYSVNK…
	Clan86	CYP704	Glyma.07G043300.1	MGGLMILICMVVSWMFIHRWSQRNKKGPKTWPFFGAAIEQLMNYDRMHDWLVNYLSKSKTIVVPMPFTTYTYIADPANVEHVLKTNFNNYPKGEVYHSYMEVLLGDGIFNVDGESWKKQRKTASLEFASRNLRDFSTKVFKEYALKLSTILSQVSFLNQEIDMQELLMRMTLDSICKVGFGVEIGTLAPNLPENSFAHAFDTANIIVTLRFIDPLWKIKKMLSIGSEAQLGKSIKVIDDFTYSVIRRRKAEIEDIKKSGQQNQMKQDILSRFIELGERNATDKSLRDVVLNFVIAGRDTTATTLSWAIYMVMTHAHVADKLYLELKKFEENRAKEENISFPQCDKEDPESFNRRVEQFSRLLNKDSLEKLHYLHAVITETLRLYPAVPQDPKGILEDDE…
	Clan86	CYP86	Glyma.11G175900.1	MVQMDTLHLLFTLAALLSAYFVWFHLLARTLTGPKVWPLVGSLPSMIVNRNRVHDWMAANLRQIEGSATYQTCTLTLPFFACKQAFFTVTSNPRNIEHILRTRFDNYPKGPHWQAAFHDLLGQGIFNSDGDTWLMQRKTAALEFTTRTLRQAMARWVNRTIKNRLWCILDKAAKENVSVDLQDLLLRLTFDNICGLTFGKDPETLSPELPENPFTVAFDTATEITLQRLLYPGIIWRFEKLLGIGKEKKIHQSLKIVETYMNDAVSAREKSPSDDLLSRFIKKRDGAGKTLSAAALRQIALNFLLAGRDTSSVALSWFFWLVMNHPDVEEKILDELTAVLTSTRGSDQRCWTEEAVDFEEAEKLVYLKAALAETLRLYPSVPEDFKHAIADDVLPDGTA…
	Clan86	CYP86	Glyma.14G192500.1	MFLILTKLIINVSYNTMMMQMETLPLLLTLVATLSAYFLWFHLLARTLTGPKPWPLVGSLPGLFRNRDRVHDWIADNLRGRGGSATYQTCIIPFPFLARKKGFYTVTCHPKNLEHILKTRFDNYPKGPKWQTAFHDLLGQGIFNSDGETWLMQRKTAALEFTTRTLKQAMSRWVNRSIKNRLWCILDKAAKERVSVDLQDLLLRLTFDNICGLTFGKDPETLSPELPENPFAVAFDTATEATMHRFLYPGLVWRFQKLLCIGSEKKLKESLKVVETYMNDAVADRTEAPSDDLLSRFMKKRDAAGSSFSAAVLQRIVLNFVLAGRDTSSVALTWFFWLLTNHPDVEQKIVAEIATVLADTRGGDRRRWTEDPLDFGEADRLVYLKAALAETLRLYPSVP…
	Clan86	CYP86	Glyma.03G008100.2	METCTALLFLTAITAYLIWFTFISRSLKGPRVWALLGSLPGLIDNCDRMHDWICDNLRACGGTYQTCICAIPFLAKKQGLVTVTCDPRNLEHILKTRFDNYPKGPTWHAVFHDLLGDGIFNTDGDTWLFQRKTAALEFTTRTLRQAMARWVSRAINRLCLILEKAENQVEPVDLQDLMLRLTFDNICGLAFGRDPQTCVSSLPDNRFATAFDRATEATLQRFILPEVLWKVKKWLRLGMEVSLSRSLAHVDDHLSNVIEKRKVELLTQQKDGTLHDDLLTRFMRKKESYSDKFLQQVALNFILAGRDTSSVALSWFFWLVIQNPKVEEKILREICTVLMETRGNDDMAKLFDEPLAFEEVDRLVYLKAALSETLRLYPSVPEDSKHVVADDVLPDGTFV…
	Clan86	CYP86	Glyma.05G208900.1	MDAATALMILSAIAAYLIWFTLVTRSLKGPRVWPLLGSLPGLIQHANRMHDWIADNLRACGGTYQTCICALPFLARKQCLVTVTCDPKNLEHILKLRFDNYPKGPTWQSAFHDLLGEGIFNSDGDTWLFQRKTAALEFTTRTLRQAMARWVNRAIKHRFCPILATAQKENQSVDLQDLLLRLTFDNICGLAFGQDPQTLAAGLPDNAFALSFDRATEATLQRFILPEILWKLKRWLRLGMEVSLSRSLKHIDQYLSHIIKNRKLELLNGNGSHHHDDLLSRFMRKKESYSEEFLQHVALNFILAGRDTSSVALSWFFWLCVKNPRVEENILNELCTVLLSTRGDNISTWLNEPLVFDEVDRLVYLKAALSETLRLYPSVPEDSKHVVKDDVLPNGTFVP…
	Clan86	CYP86	Glyma.05G208981.1	MILSAIAAYLIWFTLVTRSLKGPRVWPLLGSLPGLIQHANRMHDWIADNLRACGGTYQTCICALPFLARKQCLVTVTCDPKNLEHILKLRFDNYPKGPTWQSAFHDLLGEGIFNSDGDTWLFQRKTAALEFTTRTLRQAMARWVNRAIKHRFCPILATAQKENQSVDLQDLLLRLTFDNICGLAFGQDPQTLAAGLPDNAFALSFDRATEATLQRFILPEILWKLKRWLRLGMEVSLSRSLKHIDQYLSHIIKNRKLELLNGNGSHHHDDLLSRFMRKKESYSEEFLQHVALNFILAGRDTSSVALSWFFWLCVKNPRVEENILNELCTVLLSTRGDNISTWLNEPLVFDEVDRLVYLKAALSETLRLYPSVPEDSKHVVKDDVLPNGTFVPAGSAVTY…
	Clan86	CYP86	Glyma.07G069500.1	METCTALLFLTAITAYLIWFTFISRSLKGPRVWALLGSLPGLIDNCDRMHDWICDNLRACGGTYQTCICAIPFLAKKQGLVTVTCDPRNLEHILKTRFDNYPKGPTWHAVFHDLLGDGIFNTDGDTWLFQRKTAALEFTTRTLRQAMARWVSRAINRLCLILKKAKDQAEPVDLQDLMLRLTFDNICGLAFGRDPQTCVLGLSDNRFATAFDRATEATLQRFILPEVLWKVKKWLRLGLEVSLSRSLVHVEDHLSNVIEKRKVELLSQQKDGTLHDDLLTRFMKKKESYTDKFLQHVALNFILAGRDTSSVALSWFFWLVIQNPKVEEKILREICTILMETRGDDMAKWLDEPLDFEEVDRLVYLKAALSETLRLYPSVPEDSKHVVADDVLPDGTFVP…
	Clan86	CYP86	Glyma.09G282700.1	MHHNISNNHSFIVTKLATNNITTTNMNFFSLIFFLLQHVHIFELTIATAMFIALRAWRSKRHHGLPIWPILGMLPSLLYGITTNLYEWLSEVLIRQNGTFTFQGPWFASLDCVLTSDPRNLEYLLKTKFSSFPKGRFFRYTLRDLLGNGIFNADKEAWQRQRKTVSLEFHSTMFRNLTAESLLELVHKRLLPLLESCVNKSRVIDLQDVLLRLTFDNVCMIAFGVDPGCSQPHLPDIPFATAFEDATETSMRRFITPVWMWKFMRHLNVGVEKRLKESIEKVDEFAESVIMTRKKELALQHDKSDLLTVFMRLKDENGMAYSDKFLRDICVNFILAGRDTSSVALSWFFWLLHMNPQVEEKILAEICRVVLSQREGLKKEEVVVGSCLAFRPEEIKKMD…
	Clan86	CYP86	Glyma.11G100100.1	MTNTTTSTILPFNQTNPMHSHIPFHSNTMTKPRNLNLTFLLQDIQILEIFLAVLVFIIIHSLRQKKHHGLAVWPVLGMVPSLVTGLRTNLYEWITEVLKRQNGTFRFKGPWFSNLNCIVTSDPRNLEHLLKTKFPLYPKGGYFRNTVRELLGDGIFNADDDTWQKQRKTASIEFHSTKFRQLTTESLFELVHYRLLPVLEASVKKSVAIDLQDILLRLTFDNVCMIAFGVDPGCLQLGLPEIPFAKAFEDATEATVFRFVTPTCLWKAMKFLNLGMERKLNKSIKGVDEFAESVIRTRKKELSLQCEDSKQRLDLLTVFMRLKDENGQAYSDKFLRDICVNFILAGRDTSSVALSWFFWLLEQNPQVEENILAEICKVVSQRKDIEREEFDNSLRFRPE…
	Clan86	CYP86	Glyma.20G002700.1	MHHNISNNHSFIVNKSATKMNFFSLTHFLLQHIHILELTIATAMFIALRAWRSKRHRGLPIWPIFGMLPSLLYGLTTNLYEWLSEVLIRQNGTFTFQGPWFASLDCVLTSDPRNLEHLLKTKFSSFPKGKFFRYTLRDLLGNGIFNADNETWQRQRKTASLEFHSTMFRNLTAESLFELVHKRLLPLLESCVNKSRVIDLQDILLRLTFDNVCMIAFGVDPGCSQPHLPEIPFATAFEDATETSMRRFITPVWMWKFMRYLDVGAEKRLRESIEKVDEFAESVIRTRKKELALQHEKSDLLTVFMRLKDENGMAYSDRFLRDICVNFILAGRDTSSVALSWFFWLLHKNPKVEERILAEICRVVMRHREGLKKEEVAGNCIAFRPEEIKKMDYLHAALS…
	Clan86	CYP94	Glyma.03G160100.1	MIDILLNLQLLAPFFLFLILPVFFFFCFTSSGPTKGTIPIPKPYPIIGHYFALKSVGNRRIQWLSDIVKISPAGTFTLHRPLGRRGVITGNPATVEYILKTRFSNYQKGRTTTSILSDFLGTGIFNADGNTWKFQRQVASHEFNTKSLRKFVEHVVDAELSNRLVPILTSAAAAQDKTLDFQDILQRFAFDNICKIAFGFDPEYLTLSAERSKFAQAFEEATEISSKRFREPLPLVWKIKRLLNIGSERRLRRAVKEVHEFARNIVREKKKELKEKQSLESVDMLSRFLSSGHSDEDFVTDIVISFILAGKDTTSAALTWFFWLLSKNPRIEKEVLKEIMEKSEAPVYDEVKDMVYTHAALCESMRLYPPVPLDTKETVDDDVLPDGTVVKKGMMVTYH…
	Clan86	CYP94	Glyma.03G160200.1	MIEILLNLQLLAPFFLFFIFPVFFFFFLTSSCPTKRSITIPKPYPLIGHYLDLKGIGNRRIQWLSDIVKISPATTFTLHRPLGRRQVITGNPATVAHILKTRFSNYQKGYTFIHTLSDFLGTGIFNADGNTWKFQRQVASHEFNTKSLRKFVEHVVDVELSDRLVPVLASAAAQDKTLDFQDILQRFAFDNICKIAFGYDPEYLTPSAERSKFAVAYEEATEISSKRFREPLPLVWKIKRVLNIGSEKKLRIAVKEVHEFAKNIVREKKKELKEKESLESVDMLSRFLSSGHSDEEFVKDIVISFILAGKDTTSAALTWFFWLLSKNPRVEKEVLKEIMEKSESPVYDEVKEMVYIHASLCESMRLYPPVPMDTKEAADDDVLPDGTVVKKGTLVTYHV…
	Clan86	CYP94	Glyma.03G160300.1	MIAMFLNLQVLVPLFFFFILPVLFFFFLGHSSAGLKKKKETDSRRTITLPKTYPLIGSYLAIQAVGNRRIQWLSDMVKISSGATFTFHRPLGRSHVFTGNPATVEYILKTRFSNYQKGRTAINILSDFLGTGIFNADGNTWKFQRQVASHEFNTKSLRKFVEHVVDAELSNRLVPILALAAAQGKTLDFQDILQRFAFDNICKIAFGFDPEYLKPSAERSKFAKAFEEATEISSKRFREPLPLIWKVKRALNIGSEKKLRIAVKEVLEFAKHIVREKKKELKEKESLESVDMLSRFLSSGHSDEDFVTDIVISFILAGKDTTSAALTWFFWLLSKNPRVEKEVLKEIMEKSEAPVYDEVKDMVYTHAALCESMRLYPPVPLDTKETMNDDVLPSGTVVK…
	Clan86	CYP94	Glyma.19G162100.1	MIENILLNLQLLAPFFLLFIFPVLLFFFFSSSGSKKKEASITTIPKPYPLIGHYLDLKGVGNRRIQWLSDIVKISPAATFTLHRPLGSRQVITGNPATVEHILKTRFSNYIKGSIFINNLSDFLGTGIFNADGNTWKFQRQVASHEFNTKSLRKFVEHVVDVELSDRLVPVLASAAQQDQTLDFQDILQRFAFDNICKIAFGYDAEYLTPSTEQSKFAVAYEEATEISSKRFREPLPLVWKIKRLLNIGSEKRLRIAVKEVRDFAKKIVREKKKELKEKESLEQVDMLSRFLSSGHSDEDFVTDIVISFILAGKDTTSAALMWFFWLLSKNPGVEKEVLKEIMEKPETPAYDEVKDMVYIHAALCESMRLYPPVSMDSKEAVDDDVLPDGTVVKKGTLV…
	Clan86	CYP94	Glyma.13G120500.1	MEPESPALLLILFATLLWFLATTLSRGKSPPPSPTTIPKAYPVIGSVFSIAANNRRRIHWISDILHASPSSTFVLHRAFGSRQVFTANPTVVQHILKTNFPVYPKGLTLNRALGDFLGQGIFNSDGAGWKVQRQISSHEFNTRALRKFVETVVDAELSGRLLPLLAAAAKNKTVIPDLQDILQRFTFDNICKIAFGFDPEYLLPSLPLTPFATAFDDATRISSERFNAAFPLFWKIKSLLNLGSEKRLKEAISEVRGLARRIIVEKKKEFQEKETLDTLDLLSRFLCSGHSDEEFVMDIIISFILAGRDTTSAALTWFFWLISKHPKVEEEVVKEVMEKDAAYTHVYDEVKDMVYTHAALCESMRLYPPVPVDTKEAGEDDVLPDGTEVKRGWRVAYHI…
	Clan86	CYP94	Glyma.19G090800.1	MGGAFMILLELLPLSLIFLPILFYITLAAFWRGDKISGPASPATYPLIGCLISFYRNKHRLLDWYTELLAQSPTNTIVVQRLGARRTIVTANPQNVEYMLKTNFNNFPKGKPFTEILGDFLGQGIFNVDGEPWLTQRRLASHEFSTKSLREFVMHTLEKEVCERLVPVLEALCGENKVVDLQELLGRFSFNVICRFTLGTNRCCLDPSVPTCPLARAFDVAAEVSAKRGAAPLFMMWRVKRWLGAGSERLLKNAVGEVQTHVMRMIQERKKQKGERNDDDVEDDLLSRLICAGHEEEIIRDMVISFIMAGRDTTSAAVTWFFWVLSHYSHLEEKIVEEAKGVLDYESLKNLSFLKACLCESMRLYPPVAWDSKHATDDDLLPDGTVVKAGDRVTYFPYG…
	Clan86	CYP94	Glyma.01G112400.1	MVGLGSPTFQNITAPSSSYIEWKYKSHNNNHAPLSHPIIGCLVSFYQNRHRLLDWYTEQLANSPTQTIVVRRLGARRTVVTANPRNVEYILKTNFGNFPKGKPFTEILGDFLGCGIFNVDGELWHTQRKLASNAFSTRSLKDFIVKTLQEEVQQRLVPLLEHAARENHVIDLQDVLSRLTFDTVCKVSLGYDPCCLDLSKPLPPLLTAFDTASEVSAARGSAPVFLVWKMKRMLNVGSEKALKEAVKLVHESVMNIIKLKKEEIRFNRKNGTDLLDRLLEACHEEIVVRDMVISMIMAGRDTTSAAMTWLFWLLSRHREQEASLVKEVYDENNQNQGLGLDYECLKEMKLLKACLCESMRLYPPVAWDSKHAGGADVLPDGTHVEKGDRVTYFPYGMGR…
	Clan86	CYP94	Glyma.03G077600.1	MLIFFFTLLVSFSGFLLLFLDTQPEQQRSHNYNHAPLSHPIIGCLVSFYQNRHRLLDWYTEHLANSPTQTIVVRRLGARRTVVTANPRNVEYILKTNFGNFPKGKPFTEILGDLLGCGIFNVDGELWHTQRKLASHEFSTRSLKDFIVKTLQEETQQRLLPLLEHAARESHVIDLQDVLRRLTFDTVCRVSLGYDPSCLDLAKPLPPLLTAFDTASEVSAARGAAPVFLVWKMKRILNVGSEKSLKEAVKLVHESVVKIIKAKKDKIAFNERNCGMDLLDRLLKAGHEEIVVRDMVISMIMAGRDTTSAAMTWLFWLLSKHREQEASLVKEFSCGENENKCLDYECLKEMKLLKACLCESMRLYPPVAWDSKHAGGADVLPDGTHVGKGDRVTYFPYGM…
	Clan86	CYP94	Glyma.03G077800.1	MLIFFFTLLVSFSGFLLLFLDTQPEQQRSHNYNHAPLSHPIIGCLVSFYQNRHRLLDWYTEHLANSPTQTIVVRRLGARRTVVTANPRNVEYILKTNFGNFPKGKPFTEILGDLLGCGIFNVDGELWHTQRKLASHEFSTRSLKDFIVKTLQEETQQRLLPLLEHAARESHVIDLQDVLRRLTFDTVCRVSLGYDPSCLDLAKPLPPLLTAFDTASEVSAARGAAPVFLVWKMKRILNVGSEKSLKEAVKLVHESVVKIIKAKKDKIAFNERNCGMDLLDRLLKAGHEEIVVRDMVISMIMAGRDTTSAAMTWLFWLLSKHREQEASLVKEFSCGENENKCLDYECLKEMKLLKACLCESMRLYPPVAWDSKHAGGADVLPDGTHVGKGDRVTYFPYGM…
	Clan86	CYP94	Glyma.16G057100.1	MGGAFMILLSLPFSLIFLLILFYITLPATTGRGKKISGPAGPATYPLIGCLISFYRNRYRLLDWYTELLAQSPTNTIVVQRLGARRTIVTTNPQNVEYMLKTNFNNFPKGKPFTEILGDFLGQGIFNVDGESWLASRRLASHEFSTKSLREFVMHTLEKEVCERLVPVLDEALCGENKVVDLQELLRRFSFNVICKFTLGTNNYNRCCLDPSVPTCPLARAFDVAAEVSAKRGAAPLFMIWRVKRWFCAGSERLLKIAVGEVQTHVMRMIQERKQKGEINYYEDDLLSRLICAGHEEEVIRDMVISFIMAGRDTTSAAMTWFFWVLSHYSHLEDKIVEEAKGVLDYESLKNLSFLKACLCESMRLYPPVAWDSKHATDDDLLPDGTVVKAGDRVTYFPY…
	Clan86	CYP94	Glyma.03G193500.1	MELELESFTLCTLMQLFTNIPFGSTLCLSLAIIIITLVILTTFSSSLFLRWPKIITFFCSCETCQAYLTSGWSKTFDNLCDWYAHLLRNSPTKTIHIHVLRNTITANPDNVEYMLKTRFHNFPKGKTFSTILGDFLGRGIFNVDGESWSFQKKMASLELSKNSIRSFAFEVVKFEIKDRLIPLLVLSKQNDCVLDLQDVFKRFSFDSICRFSFGLDPMCLELSLPISEFAMSFDLASKLSAERAMSVSPLIWKIKRFLNVGSEKKLRKAIKMIDILAREVIRQRRKMGFSSISPHKDDLLSRFMRTITDDTYLKDIIVSFLLAGRDTVASALTSFFWLLAKHPEVESQILLEAEQVIGSDYNKDLTSYEELQQLHYLQAAANESMRLYPPIQFDSKFCL…
	Clan86	CYP94	Glyma.11G185700.1	MSFQGFLSLQSMSATCGFLFFAFTLLFSFFSFLVFVSRMKPWCNCDVCKSYLTVSWLNKFPNLCDWYTHLLRKSPTGTIHVHVLENTITSNPVNVEYILKTNFQNYPKGKPFSVILGDLLGRGIFNVDGESWKLQRKMASLELGSVAIRTNAMELVNEEIHARLIPFIMGSVTHDELNDSVCVLDLQDILRRFSFDNICKFSFGLDPGCLLPNLPVSNLADAFDLASKLSAERAMNASPFIWKLKRLLNVGSERKLREAINVVNDVANEMIKQRIEMGFNTRNDLLSRFTGSINDDVYLRDIVVSFLLAGRDTIASGLTGFFMLLSKSPEVEELIREEAGRVVGPGQEFPSFEQIREMHYLNAAIHESMRLFPPIQFDSKFATEDDVLPDGTFVRKGSR…
	Clan86	CYP94	Glyma.12G087200.1	MSFAGFLSLQSMSATCGFFFFSFTLLFSFFSFLVFISRMKPWCNCDLCKSYLTVSWLKKFPNLCDWYTHLLRKSPTGTIHVHVLGNTITSNPHNVEHILKTNFQNYPKGKPFSTILGDLLGRGIFNVDGESWKFQRKMASLELGSVAIRTYAMELVNEEIHARLIPIMESTARGELNSVCVLDLQDILRRFSFDNICKFSFGLDPGCLLPNLPVSDLAVAFDLASKLSAERAMNASPFIWKLKRLLNIGSEKKLRETINVVNDVAKEMIKQRREMGFKTRNDLLSRFMGSIDDDVYLRDIVVSFLLAGRDTIAAGLTGFFMLLSKSPEVEELIREEVGRVMGPGQEFPSFEQIREMHYLNAAIHDSMRLFPPIQFDSKFATEDDVLPDGTFVRKGSRVT…
	Clan86	CYP94	Glyma.13G152202.1	MELIPSLPTSSPLLQFFINRVCFSYLLFSMITIILFLIIIIAIARLLKSFFCSCETCQTYLTSSWSETFDNLCDWYAHLLRNSPNKTIHIHVLRNTITANAENVEYILKTKFENFPKGKPFSAILGDFLGKGVFNVDGDAWRFQKKMASLHLNNNSVVASFAFEIVNDEIKNRLTPLLLMNQKNGVVLDLQDVFQRFSFDCICRFSFGLDPDFCLESGSMLVFAKSFDLASKLSAERATAVSPYVWKAKRLLNLGSEKRLKKALRVINALAKEVIKQRREKGFSENKDLLSRFMNTIHDDDTYLRDVVVSFLLAGRDTVASALTSFFYLLGKHPEVESLIRDEADRVIGHDKDLTSFEELKQLHYLQAATHESMRLFPPIQFDSKFCLEDDVLPDGTKV…
	Clan86	CYP94	Glyma.13G152202.2	MITIILFLIIIIAIARLLKSFFCSCETCQTYLTSSWSETFDNLCDWYAHLLRNSPNKTIHIHVLRNTITANAENVEYILKTKFENFPKGKPFSAILGDFLGKGVFNVDGDAWRFQKKMASLHLNNNSVVASFAFEIVNDEIKNRLTPLLLMNQKNGVVLDLQDVFQRFSFDCICRFSFGLDPDFCLESGSMLVFAKSFDLASKLSAERATAVSPYVWKAKRLLNLGSEKRLKKALRVINALAKEVIKQRREKGFSENKDLLSRFMNTIHDDDTYLRDVVVSFLLAGRDTVASALTSFFYLLGKHPEVESLIRDEADRVIGHDKDLTSFEELKQLHYLQAATHESMRLFPPIQFDSKFCLEDDVLPDGTKVESGTRVTYHPYAMGRLEEIWGCDCLEFRP…
	Clan86	CYP94	Glyma.03G122300.1	MELLSFLFLSLLFFLYLYIQFLARKKPRNNKAFKDYPLIGTLPEFLKNRHRFLEWTTQVLRDSPTNTGVFSRPYKLHGILTANPDNVEHVLKTKFDNYPKGERFIHLLQDFLGNGIFNSDGDLWKVQRKTASYEFSTKSLRNFVVDAVTFELQTRLLPILSKASETNKVLDLQDLLERFAFDNVCKLAFNVDPACLGGDGTAGGEFMRAFEDAAVLSSGRFMSILPVVWKIKKLFNFGSERRLRESITTVHQFADSIIRSRLESKDQIGDEDLLSRFIRTENTSPEFLRDVVISFILAGRDTTSSALSWFFWILSSRPDVQRKIRDEIETVRSEKSKGAFGYEEVKEMRYLQAAISETMRLYPPVPVDTMECLNDDVLPDGTRVGKGWFVTYHTYAMGR…
	Clan86	CYP96	Glyma.05G003000.1	MAMLAYEAAIIAAFFCFLYFFHRRQCCRHPLFTDFPILGMLPQLLFNLWRAHDYSTQVLKQRGGTAEFTGPWFTKMNCLVTGDPINVHHVMSKSFPNYVKGPVFREIFQAFGDGIFTADSEAWKYNRNLFHSLFKHRSFEVFLEKTIHNKVQNTLLPMLDNLQQQGRVVDLQDVFNRFTFDNICSMVLGYDPSCLSIDFPEVEIEKAFNQAEESIFYRQIVPICFWKLQKWLQIGQEKKMTEACKTLNQFIHACIASKREELNKYKENEMGEAHKDLLTALMREGKAHDDGFLRDSVFNLFVAGRDTITSALTWFFWLVATNPLVEAKILEEIKEQFETNEKMLGVLTVEEVKKLVYLHGAICEALRLFPPIPFERKLAIKADVLPSGHSVNSRTMILF…
	Clan86	CYP96	Glyma.05G003100.1	MFGYAAAIIAAILFFQYFFHRRRCCKHPILTEYPIIGMLPQLLFNLWRAHDYSTQVLQRHGGTGEFIGPWFTNMDYLVTCDPINVHHMLSKNFHNYVKGPEFRHIFQAFGDGIFAADSEAWKYSRDLFHSLFKQKSFEVFVAKTIHNKVHNGLLPILDHVQQQGRVVDLQDVFNRFTFDNICSIVLGNDPNCLSIDFSEVAIEKAFNEVEESIFYRHVLPRCVWKIQRWLQIGQEKKMTEACKTLDQFIHACIASKREKLSKYNENEMGEAHHVDFLTALMREETAHDDKFLRDAVFNLFVAGRDTITSALTWFFWLVATNPSVEAKILEEMKEKLGTKEKTLGVLSVEEVKRLVYLHGAICEALRLFPPIPFETKQAIKADMLPSGHRVNSGTKILFI…
	Clan86	CYP96	Glyma.19G003600.1	MAMLLIYAAITASLFCFLYLFHRRRSCKHPLMRDYPILGMLPPILFNLWRIHDFCTEVLKKQGGTGEFKGPWFTKMHYLITCDSLNVQHMLCKSFDNYIKGPEFREIFEPFGDGVVTADSETWKYFRTVLHSLIKQRRFETFVDKTVQKKVHTSLLPILDHVQQQGEMVDLQDVFNRFTFDNICSTIVGHDPKCLSIDFPEVAIERAFNESEESIFYRHTVPSSVWKFQKWLQIGQEKKMTEACKTFDEFIYSCIASKRQELSKCSREEMDNEAPFDLLTALITEERGRVHDDKFLRDAAFNFFVAGRETMTSALTWFFWLVTKHPLVEAKILEEIKDNFEANYEGVVGIEEVKKLVYLHGALCEALRLFPPVPIERKQAIKDDTLPSGHRVNGNTMIL…
	Clan86	CYP96	Glyma.19G057300.1	MAVLSSGEFLGAFLVFVVIHYWRLNRHTPIAKWPILGMLPGVFLNMPTIFDYITSVLKREGGTFMFEGPCLSNMNIMFTSDPMNVQHITSTKFQNYGKGNDFREIFEILGDGIFRSDSQLWNYNRTILHSVFRKASFQLFVHQTIMNKIESCLLPFLDRGWKEGMEVDLQDVFQRLTFDNICSIVLGFDPNCLSMEFPEVACEKAFTEAEDALLYRHFRPKCLWKLMKWLHVGKEKKLEESQKIVDQMLYTEIRSKCKVQGESNNSSTPVDESQFSLLNVLINEVGKGKADDNFLRDTAINLLAAGRDTISSGLSWFFWLVATHPSVESKILEEIRKNLPAREGNWKNLGVESISRLTYLHAAISEALRLYPPIPIEHKCALKSDMLPSGHWINSNTMI…
	Clan86	CYP96	Glyma.05G003200.1	MAFHGYAAAPTIAALFCFLYFFHRRLCCRHPLLTDYPILGMLPQLLFNLWRAHDFFTEILKRHGPTGEFTGPWFTSMDYLVTCDPINVHHMLSKNFHNYVKGPEFRHIFQAFGDGIFTADFEAWKYNRDLFHSLFKQKSFEVFLVKTIHNKVHNGLLPILDHVQQQGRVVDLQDVFNRFTFDNICSIVLGNDPNCLSIDFSEVAIEKAFNEAEESIFYRHVVPRCVWKIQRWLQIGQEKKMTEACKTLDQFIHARIASKREELSKYNENEMGEAHHVDLLTALMREGKAHDDKFLRDAVFNLFVAGRDTITSALTWFFWLVATNPSVEAKILEEMKEKLGTKEKSLGVLSVEEVKRLVYLHGAICEALRLFPPIPFERKQAISSDMLPSGHRVNSGTMI…
	Clan86	CYP96	Glyma.19G003400.2	MAMLVYEAVIVTAVLCMLYFLHRKRCCRHPLFPDYPIIGMLPPVLCNLWRAHDLISDVLKQHGGTGEFTGPWFTIMNCLISSDPINVHHVMSKNFHNYVKGPVFRDIFQAFGDGIFTADSEAWKYNRDLFHSLFKNRSFEFFLEKTIQNKVQNSLLPMLDHMHQQRKVVDLQDVFGRFTFDNICSLVLGYDPNCLSVDIPEVAIEKAFNEAEESIFYRHTVPKCVWKLQKWLQIGQEKKMTEACKTLDQFIHACIASKRVELSNDNEMGEAHHVDLITALMREKQTHDDRFIRDAVFNLFVAGRDTITSALTWFFWLVATNPLVEAKILEEIKEKLETNEKTLGVLSVEKVKKLVYLHGAICETLRLFPPIPFERKLAIKADMLPSGHRVNPRTMILIS…
	Clan86	CYP96	Glyma.20G004700.1	MFMYIGVFVSILSTIIFFRKHNRDEPITNWPIIGMLPSVLQNLSNIHYLTTEALKHYGGTLMFKGPWFTNTNFILTSDPMNVHHITSKNFGNYGKGSNFNEIFEVLGGGIINSDDLHAWKQERTMLHSLLKRESFKIFLQKTIQKKLENCLIPFLDHASKAGAEVDLQDAFQRFTFDNACCMAFGYDPNCLPNKFSTKLSHFAYQKALIVLEDVAFHRHITPRCLWKLQEWLQIGKEKKFKEAIEAFDKFLFERIASKREEQSRCNNHTKKEDDNTHSDLIRVLMEEGAEKGKIMDDKYLRDTAFTLVSAGSGTVSAGLSWFFWLVSTHPDVEAKIFQEIKDNCVNQDGDWIASSVEEFGKLVYLHGAICEALRLFPSIPFDHKCAIKSDILPSGHHVS…
	Clan97	CYP97	Glyma.09G252800.1	MASHVALLRAPPPLSISTQRFHAKQISINGLKFTSSSSCFPCSITTQRGSCSSVITCSSSNDRDPNSVDDEDVKQVERILEDKRRAALSAKIASGEFTVRQKSVLLSIMEGLAKVGAPNEVLEFLSGWVEGGGLQPKIPEAKGSIKAIRSVAFFIPLYELYLTYGGIFRLTFGPKSFLIVSDPSIAKHILRDNSKSYSKGILAEILDFVMGKGLIPADGEIWRVRRRAIVPALHQKYVAAMIGLFGQASDRLCQKLDAAASDGEDVEMESLFSRLTLDIIGKAVFNYDFDSLSNDTGIVEAVYTVLREAEDRSVAPIPVWEIPIWKDISPRLRKVNAALKFINDTLDDLIAICKKMVDEEELQFHEEYMNEKDPSILHFLLASGDDVSSKQLRDDLMTM…
	Clan97	CYP97	Glyma.09G252800.2	MEGLAKVGAPNEVLEFLSGWVEGGGLQPKIPEAKGSIKAIRSVAFFIPLYELYLTYGGIFRLTFGPKSFLIVSDPSIAKHILRDNSKSYSKGILAEILDFVMGKGLIPADGEIWRVRRRAIVPALHQKYVAAMIGLFGQASDRLCQKLDAAASDGEDVEMESLFSRLTLDIIGKAVFNYDFDSLSNDTGIVEAVYTVLREAEDRSVAPIPVWEIPIWKDISPRLRKVNAALKFINDTLDDLIAICKKMVDEEELQFHEEYMNEKDPSILHFLLASGDDVSSKQLRDDLMTMLIAGHETSAAVLTWTFYLLSKEPRVVSKLQEEVDSVLGDRYPTIEDMKKLKYTTRVINESLRLYPQPPVLIRRSLEDDVLGEYPIKRGEDIFISVWNLHRSPKLWDDA…
	Clan97	CYP97	Glyma.18G239900.1	MASHVALLRVPPPLSISTQRFHAKQICINGLKLTNTSSSSSSSSCFPCSITTQRGSCSSVITCSSSNGRDPNSVDEEDVKQVERILEEKRRAALSAKIASGEFTVKQKSGLLSIMEGLAKVGVPNEVLEFLFGWFEGGGEHPKIPEAKGSIKAVRSVAFFIPLYELYLTYGGIFRLTFGPKSFLIVSDPSIAKHILRENSKAYSKGILAEILDFVMGKGLIPADGEIWRVRRRAIVPALHQKYVAAMIGLFGQAADRLCQKLDAAASDGEDVEMESLFSRLTLDIIGKAVFNYDFDSLSNDTGIVEAVYTVLREAEDRSVAPIPVWEIPIWKDVSPRLRKVNAALKLINDTLDDLIAICKRMVDEEELQFHEEYMNEQDPSILHFLLASGDDVSSKQLR…
	Clan97	CYP97	Glyma.18G239900.2	MTAAVQLLFCSLPSFIHTCMLFLVLYVQGILAEILDFVMGKGLIPADGEIWRVRRRAIVPALHQKYVAAMIGLFGQAADRLCQKLDAAASDGEDVEMESLFSRLTLDIIGKAVFNYDFDSLSNDTGIVEAVYTVLREAEDRSVAPIPVWEIPIWKDVSPRLRKVNAALKLINDTLDDLIAICKRMVDEEELQFHEEYMNEQDPSILHFLLASGDDVSSKQLRDDLMTMLIAGHETSAAVLTWTFYLLSKEPRVMSKLQEEVDSVLGDQYPTIEDMKKLKYTTRVINESLRLYPQPPVLIRRSLEDDVLGEYPIKRNEDIFISVWNLHRSPKLWDDADKFEPERWALDGPSPNETNQNFKYLPFGGGPRKCVGDLFASYETVVALAMLVRRFNFQIAVGA…
	Clan97	CYP97	Glyma.18G239900.3	MASHVALLRVPPPLSISTQRFHAKQICINGLKLTNTSSSSSSSSCFPCSITTQRGSCSSVITCSSSNGRDPNSVDEEDVKQVERILEEKRRAALSAKIASGEFTVKQKSGLLSIMEGLAKVGVPNEVLEFLFGWFEGGGEHPKIPEAKGSIKAVRSVAFFIPLYELYLTYGGIFRLTFGPKSFLIVSDPSIAKHILRENSKAYSKGILAEILDFVMGKGLIPADGEIWRVRRRAIVPALHQKYVAAMIGLFGQAADRLCQKLDAAASDGEDVEMESLFSRLTLDIIGKAVFNYDFDSLSNDTGIVEAVYTVLREAEDRSVAPIPVWEIPIWKDVSPRLRKVNAALKLINDTLDDLIAICKRMVDEEELQFHEEYMNEQDPSILHFLLASGDDVSSKQLR…
	Clan97	CYP97	Glyma.11G016200.1	MSAATSSTLSTVTDANLHSRFHSRLVPFTHHFSLSQPKRISSIRCQSINTDKKKSSRNLLDNASNLLTDLLSGGSIGSMPIAEGAVSDLLGRPLFFSLYDWFLEHGAVYKLAFGPKAFVVVSDPIVARHILRENAFSYDKGVLADILEPIMGKGLIPADLDTWKQRRRVIAPAFHNSYLEAMVKIFTTCSERTILKFNKLLEGEGYDGPDSIELDLEAEFSSLALDIIGLGVFNYDFGSVTKESPVIKAVYGTLFEAEHRSTFYIPYWKIPLARWIVPRQRKFQDDLKVINTCLDGLIRNAKESRQETDVEKLQQRDYLNLKDASLLRFLVDMRGADVDDRQLRDDLMTMLIAGHETTAAVLTWAVFLLAQNPSKMKKAQAEVDLVLGTGRPTFESLKE…
	Clan97	CYP97	Glyma.11G016200.2	MGKGLIPADLDTWKQRRRVIAPAFHNSYLEAMVKIFTTCSERTILKFNKLLEGEGYDGPDSIELDLEAEFSSLALDIIGLGVFNYDFGSVTKESPVIKAVYGTLFEAEHRSTFYIPYWKIPLARWIVPRQRKFQDDLKVINTCLDGLIRNAKESRQETDVEKLQQRDYLNLKDASLLRFLVDMRGADVDDRQLRDDLMTMLIAGHETTAAVLTWAVFLLAQNPSKMKKAQAEVDLVLGTGRPTFESLKELQYIRLIVVEALRLYPQPPLLIRRSLKSDVLPGGHKGEKDGYAIPAGTDVFISVYNLHRSPYFWDRPDDFEPERFLVQNKNEEIEGWAGLDPSRSPGALYPNEVISDFAFLPFGGGPRKCVGDQFALMESTVALTMLLQNFDVELKGTPE…
	Clan97	CYP97	Glyma.10G062900.1	MSSSLSHLTPLSLFLPRRPTVSSPTPKPYRFSVKSSINKPPDTGTGTSKPSSWFSPDWLTSLSRSLAAGNDDSGIPLASAKLDDVSDLLGGALFLPLFKWMQDYGPIYRLAAGPRNFVVVSDPAIAKHVLRNYGKYAKGLVAEVSEFLFGSGFAIAEGPLWTARRRAVVPSLHKRYLSVIVDRVFCRCAERLVEKLQPDALNGTAVNMEAKFSQLTLDVIGLSVFNYNFDSLNMDSPVIEAVYTALKEAEARSTDLLPYWKFKFLCKIIPRQIKAEEAVSIIRKTVEDLIEKCREIVESEGERIDVEEYVNDSDPSILRFLLASREEVSSVQLRDDLLSLLVAGHETTGSVLTWTLYLLSKDSSSLAKAQEEVDRVLQGRRPTYEDIKNLKFLTRCIIE…
	Clan97	CYP97	Glyma.13G147500.1	MPSSLSLSLTPLSVFPPRRVPTPSPKPYRLSVKSSINKPPDAGTTKPSSWLSPDWLTSLSRSLTAGNDVSGIPVASAKLDDVSDLLGGALFLPLFKWMQDYGPIYRLAAGPRNFVVVSDPAIAKHVLRNYGKYAKGLVAEVSEFLFGSGFAIAEGPLWTARRRAVVPSLHKRYLSVIVDRVFCRCAERLVEKLQPDALNGTAVNMEAKFSQLTLDVIGLSVFNYNFDSLNTDSPVIEAVYTALKEAEARSTDLLPYWKFKFLCKIIPRQIKAEEAVSVIRKTVEDLIEKCREIVESEGERIDVEEYVNDSDPSILRFLLASREEVSSVQLRDDLLSLLVAGHETTGSVLTWTLYLLSKDSSSLAKAQEEVDRVLQGRRPTYEDIKDLKFLTRCIIESLR…
	Clan97	CYP97	Glyma.13G147500.2	MPSSLSLSLTPLSVFPPRRVPTPSPKPYRLSVKSSINKPPDAGTTKPSSWLSPDWLTSLSRSLTAGNDVSGIPVASAKLDDVSDLLGGALFLPLFKWMQDYGPIYRLAAGPRNFVVVSDPAIAKHVLRNYGKYAKGLVAEVSEFLFGSGFAIAEGPLWTARRRAVVPSLHKRYLSVIVDRVFCRCAERLVEKLQPDALNGTAVNMEAKFSQLTLDVIGLSVFNYNFDSLNTDSPVIEAVYTALKEAEARSTDLLPYWKAEEAVSVIRKTVEDLIEKCREIVESEGERIDVEEYVNDSDPSILRFLLASREEVSSVQLRDDLLSLLVAGHETTGSVLTWTLYLLSKDSSSLAKAQEEVDRVLQGRRPTYEDIKDLKFLTRCIIESLRLYPHPPVLIRRAQ…

## Sheet: Members in each family
List of GmP450 in each P450 family
Type	Clan	Family	Putative Candidates	Count
A-type	Clan71	CYP701	Glyma.13G371400.1, Glyma.15G002200.1	2
	Clan71	CYP703	Glyma.12G160400.1	1
	Clan71	CYP712	Glyma.12G239100.1, Glyma.19G144600.1	2
	Clan71	CYP706	Glyma.07G218200.1, Glyma.17G134200.1, Glyma.17G134100.1	3
	Clan71	CYP71	Glyma.10G115500.1, Glyma.05G042600.1, Glyma.17G125400.1, Glyma.04G110400.1, Glyma.06G176100.1, Glyma.06G176200.1, Glyma.07G194300.1, Glyma.13G181900.1, Glyma.09G142200.1, Glyma.09G142500.1, Glyma.09G142900.1, Glyma.09G260900.1, Glyma.16G195500.1, Glyma.16G195600.1, Glyma.05G042800.1, Glyma.17G125300.1, Glyma.02G235300.1, Glyma.02G298800.1, Glyma.01G179600.1, Glyma.07G160700.1, Glyma.07G160700.4, …	53
	Clan71	CYP736	Glyma.07G089900.1, Glyma.09G186200.1, Glyma.09G186300.1, Glyma.09G186400.1, Glyma.09G186000.1, Glyma.07G089700.1, Glyma.08G140500.1, Glyma.05G233200.1, Glyma.07G089800.1, Glyma.08G140600.1, Glyma.05G182800.2, Glyma.08G140400.2, Glyma.08G140600.2, Glyma.09G186500.1	14
	Clan71	CYP73	Glyma.20G114200.1, Glyma.14G205200.1, Glyma.02G236500.1	4
	Clan71	CYP75	Glyma.05G021800.1, Glyma.05G021900.1, Glyma.05G022100.1, Glyma.06G202300.1, Glyma.13G072100.1, Glyma.17G077700.3, Glyma.20G041700.2	7
	Clan71	CYP76	Glyma.03G021200.1, Glyma.03G189900.1, Glyma.07G083000.1, Glyma.07G083000.2, Glyma.10G200800.1, Glyma.10G203500.1, Glyma.10G296400.1, Glyma.11G108300.1, Glyma.13G265300.1, Glyma.18G222900.1, Glyma.18G223100.1, Glyma.20G147900.1, Glyma.20G148000.1, Glyma.20G189600.1	14
	Clan71	CYP77	Glyma.07G258800.1, Glyma.10G202400.1, Glyma.17G015400.1, Glyma.20G188000.1	4
	Clan71	CYP78	Glyma.01G061100.1, Glyma.02G119600.1, Glyma.05G019200.1, Glyma.05G147100.1, Glyma.07G052300.1, Glyma.08G104100.1, Glyma.11G250200.1, Glyma.16G021200.1, Glyma.17G080500.1, Glyma.19G240800.1, Glyma.19G258700.1	11
	Clan71	CYP79	Glyma.11G197300.1, Glyma.11G197400.1, Glyma.13G051600.1, Glyma.20G065000.1, Glyma.20G065100.1	5
	Clan71	CYP81	Glyma.08G089400.1, Glyma.08G089500.1, Glyma.09G048700.2, Glyma.09G048800.1, Glyma.09G048900.1, Glyma.09G049100.1, Glyma.09G049200.1, Glyma.09G049300.1, Glyma.11G051800.1, Glyma.11G093100.1, Glyma.15G156100.1, Glyma.16G149300.2	12
	Clan71	CYP82	Glyma.01G135200.1, Glyma.01G181800.1, Glyma.01G181900.1, Glyma.02G078800.1, Glyma.04G035500.1, Glyma.04G035600.1, Glyma.06G035200.1, Glyma.06G035300.1, Glyma.06G035400.1, Glyma.11G060100.1, Glyma.11G060200.1, Glyma.13G068500.1, Glyma.13G068800.2, Glyma.13G068800.4, Glyma.13G285300.3, Glyma.15G203500.1, Glyma.16G089700.1, Glyma.16G089900.1, Glyma.16G090000.1, Glyma.16G090000.2, Glyma.19G014600.1, …	25
	Clan71	CYP83	Glyma.01G078300.1, Glyma.03G029900.1, Glyma.03G030400.1, Glyma.03G030600.1, Glyma.03G030800.1, Glyma.03G030900.1, Glyma.03G031000.1, Glyma.03G031400.1, Glyma.11G168428.1, Glyma.17G255900.1, Glyma.18G100500.1	11
	Clan71	CYP84	Glyma.01G169200.1, Glyma.11G074100.1, Glyma.16G131200.1	3
	Clan71	CYP89	Glyma.07G220300.2, Glyma.07G220400.1, Glyma.07G220500.1, Glyma.12G013700.1, Glyma.20G018600.1, Glyma.20G018800.1, Glyma.20G018900.1	7
	Clan71	CYP92	Glyma.07G039800.1, Glyma.16G008600.1	2
	Clan71	CYP93	Glyma.02G176200.1, Glyma.03G142000.1, Glyma.03G142100.1, Glyma.03G143700.1, Glyma.07G202300.1, Glyma.08G350800.1, Glyma.08G350800.2, Glyma.10G092500.1, Glyma.10G092600.1, Glyma.12G067000.1, Glyma.12G067100.1, Glyma.13G173401.1, Glyma.13G173500.1, Glyma.19G144700.1, Glyma.19G146800.1	15
	Clan71	CYP98	Glyma.03G122000.1, Glyma.19G126000.1	2		197
Non-A-type	Clan51	CYP51	Glyma.03G115300.1, Glyma.07G110900.1	2
	Clan710	CYP710	Glyma.13G217400.1, Glyma.15G095000.1	2
	Clan711	CYP711	Glyma.04G052100.3, Glyma.06G052700.1, Glyma.17G227500.1, Glyma.17G227500.2	4
	Clan72	CYP714	Glyma.06G140000.1, Glyma.18G218500.3, Glyma.18G218600.1, Glyma.18G218600.2, Glyma.07G118200.1, Glyma.18G049500.1	6
	Clan72	CYP715	Glyma.09G137600.1, Glyma.10G234600.1, Glyma.10G234700.1, Glyma.16G182600.1, Glyma.20G159700.1	5
	Clan72	CYP721	Glyma.09G117400.2, Glyma.17G249400.1, Glyma.17G249400.2	3
	Clan72	CYP72	Glyma.08G238100.1, Glyma.06G238500.1, Glyma.13G261700.1, Glyma.15G245300.1, Glyma.06G227300.2, Glyma.15G243300.2, Glyma.15G243300.5, Glyma.03G226800.1, Glyma.13G262000.1, Glyma.13G262100.1, Glyma.13G277100.1, Glyma.13G277100.2, Glyma.15G244250.2, Glyma.15G244250.3	14
	Clan72	CYP734	Glyma.05G010200.1, Glyma.06G215200.1, Glyma.17G118100.1	3
	Clan72	CYP735	Glyma.08G365000.1, Glyma.13G046400.1, Glyma.18G297200.1	3
	Clan74	CYP74	Glyma.04G035000.1, Glyma.14G078600.1, Glyma.17G246500.1, Glyma.12G191400.1, Glyma.07G162900.1, Glyma.11G122700.1	6
	Clan85	CYP707	Glyma.14G082900.1, Glyma.17G242200.1, Glyma.09G282900.1, Glyma.01G153300.1, Glyma.09G218600.1, Glyma.16G076600.1, Glyma.16G109300.1, Glyma.17G133900.1, Glyma.02G132200.1, Glyma.07G212700.1	10
	Clan85	CYP716	Glyma.05G220500.1, Glyma.08G026900.1, Glyma.08G243600.1, Glyma.05G166900.1, Glyma.08G125000.1, Glyma.08G125100.2	6
	Clan85	CYP718	Glyma.02G287300.1	1
	Clan85	CYP720	Glyma.09G160900.1, Glyma.16G210300.1	2
	Clan85	CYP722	Glyma.04G030100.2, Glyma.04G030100.3, Glyma.04G030100.4, Glyma.16G133800.1	4
	Clan85	CYP724	Glyma.16G068100.1, Glyma.16G068100.2	2
	Clan85	CYP85	Glyma.02G120700.1, Glyma.08G250000.1, Glyma.13G052900.3, Glyma.18G272300.1, Glyma.19G033900.1	5
	Clan85	CYP87	Glyma.01G216900.1, Glyma.11G026200.1	2
	Clan85	CYP88	Glyma.09G029400.1, Glyma.15G135200.1	2
	Clan85	CYP90	Glyma.02G256800.1, Glyma.11G228900.1, Glyma.14G059900.1, Glyma.14G059900.2, Glyma.18G028300.1, Glyma.01G175500.1, Glyma.02G057500.1, Glyma.02G057500.2, Glyma.11G067700.1, Glyma.02G051600.1, Glyma.11G073300.1, Glyma.07G010700.1, Glyma.08G193900.1, Glyma.08G193900.2	14
	Clan85	CYP728	Glyma.02G290000.1, Glyma.18G052400.1	2
	Clan85	CYP733	Glyma.02G083200.1, Glyma.16G168900.1, Glyma.16G168600.1	3
	Clan86	CYP704	Glyma.03G020400.1, Glyma.03G021600.1, Glyma.07G083200.1, Glyma.07G083300.1, Glyma.07G043300.1	5
	Clan86	CYP86	Glyma.11G175900.1, Glyma.14G192500.1, Glyma.03G008100.2, Glyma.05G208900.1, Glyma.05G208981.1, Glyma.07G069500.1, Glyma.09G282700.1, Glyma.11G100100.1, Glyma.20G002700.1	9
	Clan86	CYP94	Glyma.03G160100.1, Glyma.03G160200.1, Glyma.03G160300.1, Glyma.19G162100.1, Glyma.13G120500.1, Glyma.19G090800.1, Glyma.01G112400.1, Glyma.03G077600.1, Glyma.03G077800.1, Glyma.16G057100.1, Glyma.03G193500.1, Glyma.11G185700.1, Glyma.12G087200.1, Glyma.13G152202.1, Glyma.13G152202.2, Glyma.03G122300.1	16
	Clan86	CYP96	Glyma.05G003000.1, Glyma.05G003100.1, Glyma.19G003600.1, Glyma.19G057300.1, Glyma.05G003200.1, Glyma.19G003400.2, Glyma.20G004700.1	7
	Clan97	CYP97	Glyma.09G252800.1, Glyma.09G252800.2, Glyma.18G239900.1, Glyma.18G239900.2, Glyma.18G239900.3, Glyma.11G016200.1, Glyma.11G016200.2, Glyma.10G062900.1, Glyma.13G147500.1, Glyma.13G147500.2	10
	Clan727	CYP727	Glyma.06G310800.1	1		149
				346

## Sheet: Mw and pI
Molecular weight and isoelectric point of all GmP450s
Type	Clan	Family	Glyma ID	Mw (Dalton)	pI
A-type	Clan71	CYP701	Glyma.13G371400.1	57239.4	7.18
	Clan71	CYP701	Glyma.15G002200.1	57553.7	8.327
	Clan71	CYP703	Glyma.12G160400.1	59511.9	7.422
	Clan71	CYP706	Glyma.07G218200.1	59662.8	7.879
	Clan71	CYP706	Glyma.17G134100.1	58032.6	6.571
	Clan71	CYP706	Glyma.17G134200.1	57347.7	6.835
	Clan71	CYP71	Glyma.10G115500.1	56714.9	6.921
	Clan71	CYP71	Glyma.05G042600.1	58483.2	8.705
	Clan71	CYP71	Glyma.17G125400.1	58888.8	8.679
	Clan71	CYP71	Glyma.04G110400.1	58364.9	8.368
	Clan71	CYP71	Glyma.06G176100.1	57829.1	6.452
	Clan71	CYP71	Glyma.06G176200.1	58580.8	6.899
	Clan71	CYP71	Glyma.07G194300.1	58003.7	6.445
	Clan71	CYP71	Glyma.13G181900.1	57577.1	5.793
	Clan71	CYP71	Glyma.09G142200.1	58899.1	6.256
	Clan71	CYP71	Glyma.09G142500.1	58777.9	5.971
	Clan71	CYP71	Glyma.09G142900.1	58613.7	6.093
	Clan71	CYP71	Glyma.09G260900.1	60846.6	6.689
	Clan71	CYP71	Glyma.16G195500.1	58085.2	6.449
	Clan71	CYP71	Glyma.16G195600.1	58026.9	6.456
	Clan71	CYP71	Glyma.05G042800.1	56395.8	7.11
	Clan71	CYP71	Glyma.17G125300.1	59362.1	7.939
	Clan71	CYP71	Glyma.02G235300.1	57817.5	8.141
	Clan71	CYP71	Glyma.02G298800.1	57593.9	7.802
	Clan71	CYP71	Glyma.01G179600.1	57208.8	8.205
	Clan71	CYP71	Glyma.07G160700.1	58629	7.771
	Clan71	CYP71	Glyma.07G160700.4	60999	7.897
	Clan71	CYP71	Glyma.08G327100.1	57831.2	8.293
	Clan71	CYP71	Glyma.08G327200.1	57835	7.762
	Clan71	CYP71	Glyma.09G279100.1	57458.8	7.263
	Clan71	CYP71	Glyma.14G117200.1	59242.7	7.284
	Clan71	CYP71	Glyma.17G209100.1	59470.9	6.461
	Clan71	CYP71	Glyma.20G007100.1	60915	7.899
	Clan71	CYP71	Glyma.18G080200.1	56032.7	7.797
	Clan71	CYP71	Glyma.18G080200.2	52760	7.976
	Clan71	CYP71	Glyma.01G179400.1	57630	6.73
	Clan71	CYP71	Glyma.02G156000.1	56970.3	6.975
	Clan71	CYP71	Glyma.02G156100.1	56903.1	6.442
	Clan71	CYP71	Glyma.02G298600.1	57817.9	8.8
	Clan71	CYP71	Glyma.08G326900.1	58723.9	8.402
	Clan71	CYP71	Glyma.08G326900.3	53945	7.538
	Clan71	CYP71	Glyma.10G115300.1	56714.9	7.147
	Clan71	CYP71	Glyma.10G115400.1	56714	7.392
	Clan71	CYP71	Glyma.11G062600.1	57594	8.333
	Clan71	CYP71	Glyma.14G015100.1	57542.8	8.265
	Clan71	CYP71	Glyma.01G179500.1	58007.5	6.793
	Clan71	CYP71	Glyma.01G179700.1	57548	8.332
	Clan71	CYP71	Glyma.07G267100.1	59210.3	8.588
	Clan71	CYP71	Glyma.08G109900.1	59436	7.189
	Clan71	CYP71	Glyma.11G062500.1	57358.6	8.899
	Clan71	CYP71	Glyma.17G007200.1	56789.9	6.984
	Clan71	CYP71	Glyma.18G080400.1	56249.1	8.762
	Clan71	CYP71	Glyma.20G007000.1	57764.1	7.28
	Clan71	CYP71	Glyma.07G159800.1	53414.2	7.758
	Clan71	CYP71	Glyma.07G159800.6	56841.2	8.067
	Clan71	CYP71	Glyma.07G159800.7	55327.4	7.675
	Clan71	CYP71	Glyma.10G114600.1	57468.1	8.125
	Clan71	CYP71	Glyma.15G050300.1	58462.5	8.075
	Clan71	CYP71	Glyma.18G080300.1	56987.9	8.157
	Clan71	CYP712	Glyma.12G239100.1	57469.5	6.588
	Clan71	CYP712	Glyma.19G144600.1	56186.5	7.328
	Clan71	CYP73	Glyma.02G236500.1	58011.2	8.835
	Clan71	CYP73	Glyma.14G205200.1	57969.2	8.567
	Clan71	CYP73	Glyma.20G114200.1	61311.1	8.424
	Clan71	CYP736	Glyma.07G089900.1	57272.9	7.152
	Clan71	CYP736	Glyma.09G186200.1	56645	7.407
	Clan71	CYP736	Glyma.09G186300.1	56789.1	7.677
	Clan71	CYP736	Glyma.09G186400.1	57867.4	8.242
	Clan71	CYP736	Glyma.09G186000.1	48646.8	8.949
	Clan71	CYP736	Glyma.07G089700.1	56871.2	7.764
	Clan71	CYP736	Glyma.08G140500.1	57199.8	8.109
	Clan71	CYP736	Glyma.05G233200.1	58885.3	7.264
	Clan71	CYP736	Glyma.07G089800.1	57923.6	7.738
	Clan71	CYP736	Glyma.08G140600.1	56942.5	7.472
	Clan71	CYP736	Glyma.05G182800.2	56773.2	6.913
	Clan71	CYP736	Glyma.08G140400.2	56328.9	8.152
	Clan71	CYP736	Glyma.08G140600.2	46703.6	7.949
	Clan71	CYP736	Glyma.09G186500.1	57365.1	9.063
	Clan71	CYP75	Glyma.13G072100.1	52796.6	8.918
	Clan71	CYP75	Glyma.20G041700.2	52039.6	8.332
	Clan71	CYP75	Glyma.05G021800.1	57290.6	8.026
	Clan71	CYP75	Glyma.05G021900.1	57678.8	6.917
	Clan71	CYP75	Glyma.05G022100.1	57539.1	7.867
	Clan71	CYP75	Glyma.06G202300.1	56981.9	7.216
	Clan71	CYP75	Glyma.17G077700.3	58652.2	8.77
	Clan71	CYP76	Glyma.03G189900.1	59170.5	7.87
	Clan71	CYP76	Glyma.07G083000.1	56723.7	5.968
	Clan71	CYP76	Glyma.07G083000.2	53416.2	6.173
	Clan71	CYP76	Glyma.03G021200.1	58781.1	6.528
	Clan71	CYP76	Glyma.18G222900.1	57659.6	8.395
	Clan71	CYP76	Glyma.18G223100.1	57292.8	6.889
	Clan71	CYP76	Glyma.10G203500.1	58373	8.045
	Clan71	CYP76	Glyma.11G108300.1	56350.4	6.874
	Clan71	CYP76	Glyma.20G147900.1	33398	9.399
	Clan71	CYP76	Glyma.20G148000.1	55855.1	7.698
	Clan71	CYP76	Glyma.10G296400.1	57941.7	7.51
	Clan71	CYP76	Glyma.10G200800.1	55894.7	8.782
	Clan71	CYP76	Glyma.20G189600.1	55660.6	8.775
	Clan71	CYP76	Glyma.13G265300.1	54595.3	8.912
	Clan71	CYP77	Glyma.10G202400.1	60608.3	8.785
	Clan71	CYP77	Glyma.20G188000.1	66276.2	8.766
	Clan71	CYP77	Glyma.07G258800.1	57325.1	8.511
	Clan71	CYP77	Glyma.17G015400.1	58078.1	8.632
	Clan71	CYP78	Glyma.05G019200.1	59023.5	6.212
	Clan71	CYP78	Glyma.17G080500.1	59019.6	7.191
	Clan71	CYP78	Glyma.01G061100.1	58689.5	6.888
	Clan71	CYP78	Glyma.02G119600.1	58316.9	6.906
	Clan71	CYP78	Glyma.05G147100.1	57288	8.817
	Clan71	CYP78	Glyma.08G104100.1	57914.7	8.502
	Clan71	CYP78	Glyma.11G250200.1	58750.9	8.82
	Clan71	CYP78	Glyma.19G240800.1	58269.9	6.891
	Clan71	CYP78	Glyma.07G052300.1	61033.5	8.301
	Clan71	CYP78	Glyma.16G021200.1	60415	7.322
	Clan71	CYP78	Glyma.19G258700.1	58640.9	7.549
	Clan71	CYP79	Glyma.11G197400.1	59901.2	9.063
	Clan71	CYP79	Glyma.11G197300.1	60706.1	7.34
	Clan71	CYP79	Glyma.13G051600.1	60852.4	7.329
	Clan71	CYP79	Glyma.20G065000.1	59824.4	8.501
	Clan71	CYP79	Glyma.20G065100.1	62070.2	8.583
	Clan71	CYP81	Glyma.08G089500.1	57493.8	8.543
	Clan71	CYP81	Glyma.09G048700.2	58204.2	7.572
	Clan71	CYP81	Glyma.09G048800.1	58012.5	8.63
	Clan71	CYP81	Glyma.09G048900.1	57548.6	8.154
	Clan71	CYP81	Glyma.09G049200.1	57346.4	8.314
	Clan71	CYP81	Glyma.09G049300.1	57429.5	8.327
	Clan71	CYP81	Glyma.15G156100.1	57649.7	7.989
	Clan71	CYP81	Glyma.09G049100.1	57914.7	8.725
	Clan71	CYP81	Glyma.11G051800.1	56226.1	9.032
	Clan71	CYP81	Glyma.16G149300.2	65035.1	9.017
	Clan71	CYP81	Glyma.08G089400.1	57313.6	7.914
	Clan71	CYP81	Glyma.11G093100.1	60595.2	7.773
	Clan71	CYP82	Glyma.01G135200.1	58755.4	6.502
	Clan71	CYP82	Glyma.13G068500.1	61721.7	7.864
	Clan71	CYP82	Glyma.02G078800.1	59214.7	7.168
	Clan71	CYP82	Glyma.13G068800.2	59822.5	8.3
	Clan71	CYP82	Glyma.13G068800.4	59097.7	8.638
	Clan71	CYP82	Glyma.13G285300.3	58716	6.519
	Clan71	CYP82	Glyma.15G203500.1	58600	6.734
	Clan71	CYP82	Glyma.19G014600.1	59838.5	7.898
	Clan71	CYP82	Glyma.19G014700.1	59236.8	6.849
	Clan71	CYP82	Glyma.19G015000.1	59851.4	7.035
	Clan71	CYP82	Glyma.19G015200.1	62154.2	7.618
	Clan71	CYP82	Glyma.19G015300.1	59468.1	6.687
	Clan71	CYP82	Glyma.01G181800.1	59236.9	8.137
	Clan71	CYP82	Glyma.01G181900.1	60064.6	8.164
	Clan71	CYP82	Glyma.11G060100.1	61027.9	8.219
	Clan71	CYP82	Glyma.11G060200.1	61013.7	8.218
	Clan71	CYP82	Glyma.04G035500.1	59102.3	7.183
	Clan71	CYP82	Glyma.04G035600.1	59340.4	7.581
	Clan71	CYP82	Glyma.06G035200.1	60713.4	7.89
	Clan71	CYP82	Glyma.06G035300.1	61023.4	6.583
	Clan71	CYP82	Glyma.06G035400.1	59102.1	6.454
	Clan71	CYP82	Glyma.16G090000.1	59322	6.72
	Clan71	CYP82	Glyma.16G090000.2	56171.1	6.837
	Clan71	CYP82	Glyma.16G089700.1	61242.3	8.055
	Clan71	CYP82	Glyma.16G089900.1	60027.8	8.387
	Clan71	CYP83	Glyma.11G168428.1	56381.7	7.88
	Clan71	CYP83	Glyma.17G255900.1	58961.5	6.734
	Clan71	CYP83	Glyma.03G030400.1	57282.9	7.706
	Clan71	CYP83	Glyma.03G030600.1	57539.1	8.449
	Clan71	CYP83	Glyma.03G030800.1	57903.3	8.137
	Clan71	CYP83	Glyma.03G030900.1	57345.1	7.901
	Clan71	CYP83	Glyma.03G031000.1	57429	7.791
	Clan71	CYP83	Glyma.03G031400.1	58435.1	7.976
	Clan71	CYP83	Glyma.03G029900.1	57389	7.527
	Clan71	CYP83	Glyma.01G078300.1	57370.3	7.931
	Clan71	CYP83	Glyma.18G100500.1	57478.3	7.6
	Clan71	CYP84	Glyma.01G169200.1	57693.8	6.46
	Clan71	CYP84	Glyma.11G074100.1	58829.9	6.422
	Clan71	CYP84	Glyma.16G131200.1	58306.3	6.078
	Clan71	CYP89	Glyma.07G220300.2	57154.9	8.409
	Clan71	CYP89	Glyma.07G220400.1	58343.1	8.648
	Clan71	CYP89	Glyma.07G220500.1	57768.4	9.196
	Clan71	CYP89	Glyma.12G013700.1	58822.4	8.167
	Clan71	CYP89	Glyma.20G018600.1	57922.6	8.09
	Clan71	CYP89	Glyma.20G018800.1	59258	8.023
	Clan71	CYP89	Glyma.20G018900.1	58497.9	8.529
	Clan71	CYP92	Glyma.07G039800.1	59023.6	8.375
	Clan71	CYP92	Glyma.16G008600.1	58676.2	6.905
	Clan71	CYP92	Glyma.16G008600.2	61101.9	6.973
	Clan71	CYP93	Glyma.13G173401.1	58868.9	8.875
	Clan71	CYP93	Glyma.03G142000.1	58507.4	6.846
	Clan71	CYP93	Glyma.03G143700.1	57870.2	8.686
	Clan71	CYP93	Glyma.19G146800.1	57926.3	8.681
	Clan71	CYP93	Glyma.19G144700.1	57176.5	8.295
	Clan71	CYP93	Glyma.02G176200.1	38145.5	7.421
	Clan71	CYP93	Glyma.03G142100.1	57986.2	7.645
	Clan71	CYP93	Glyma.10G092500.1	57967.1	6.656
	Clan71	CYP93	Glyma.10G092600.1	58265.7	5.911
	Clan71	CYP93	Glyma.12G067000.1	59580.4	7.711
	Clan71	CYP93	Glyma.12G067100.1	59686.7	8.313
	Clan71	CYP93	Glyma.07G202300.1	58929.8	8.881
	Clan71	CYP93	Glyma.13G173500.1	58868.9	8.875
	Clan71	CYP93	Glyma.08G350800.1	58261.8	8.128
	Clan71	CYP93	Glyma.08G350800.2	53106.7	8.298
	Clan71	CYP98	Glyma.03G122000.1	57707	8.183
	Clan71	CYP98	Glyma.19G126000.1	57674.9	8.012
Non-A-type	Clan51	CYP51	Glyma.03G115300.1	55218.8	7.403
	Clan51	CYP51	Glyma.07G110900.1	55281.9	7.743
	Clan86	CYP704	Glyma.03G020400.1	58903	7.196
	Clan86	CYP704	Glyma.03G021600.1	59041.2	7.369
	Clan86	CYP704	Glyma.07G083200.1	58870.6	8.558
	Clan86	CYP704	Glyma.07G083300.1	59221.2	8.65
	Clan86	CYP704	Glyma.07G043300.1	59526.1	8.776
	Clan85	CYP707	Glyma.14G082900.1	55234.4	9.11
	Clan85	CYP707	Glyma.17G242200.1	58710.6	9.367
	Clan85	CYP707	Glyma.09G282900.1	54881.6	9.125
	Clan85	CYP707	Glyma.01G153300.1	53287.1	8.643
	Clan85	CYP707	Glyma.09G218600.1	53663.7	8.821
	Clan85	CYP707	Glyma.16G076600.1	53113.9	9.011
	Clan85	CYP707	Glyma.16G109300.1	53155.7	8.681
	Clan85	CYP707	Glyma.17G133900.1	53344.1	7.824
	Clan85	CYP707	Glyma.02G132200.1	54536.4	8.957
	Clan85	CYP707	Glyma.07G212700.1	54590.6	9.083
	Clan710	CYP710	Glyma.13G217400.1	57995.9	6.635
	Clan710	CYP710	Glyma.15G095000.1	58788.9	6.735
	Clan711	CYP711	Glyma.04G052100.3	61773.5	8.643
	Clan711	CYP711	Glyma.06G052700.1	61846.5	8.626
	Clan711	CYP711	Glyma.17G227500.1	60178.9	8.391
	Clan711	CYP711	Glyma.17G227500.2	58301.6	7.396
	Clan72	CYP714	Glyma.06G140000.1	60015.6	8.619
	Clan72	CYP714	Glyma.18G218500.3	62085.1	8.337
	Clan72	CYP714	Glyma.18G218600.1	63156.7	8.468
	Clan72	CYP714	Glyma.18G218600.2	59481.5	8.317
	Clan72	CYP714	Glyma.07G118200.1	58463.4	8.31
	Clan72	CYP714	Glyma.18G049500.1	58044	8.72
	Clan72	CYP715	Glyma.09G137600.1	58678.4	9.379
	Clan72	CYP715	Glyma.10G234600.1	59250.8	8.267
	Clan72	CYP715	Glyma.10G234700.1	58566	8.667
	Clan72	CYP715	Glyma.16G182600.1	58306	9.526
	Clan72	CYP715	Glyma.20G159700.1	58782.4	9.042
	Clan85	CYP716	Glyma.05G220500.1	54935	8.481
	Clan85	CYP716	Glyma.08G026900.1	54854	8.714
	Clan85	CYP716	Glyma.08G243600.1	54774.4	8.798
	Clan85	CYP716	Glyma.05G166900.1	56041.5	8.127
	Clan85	CYP716	Glyma.08G125000.1	55169.1	7.671
	Clan85	CYP716	Glyma.08G125100.2	55269.4	8.075
	Clan85	CYP718	Glyma.02G287300.1	56511.1	9.012
	Clan72	CYP72	Glyma.08G238100.1	60791.9	9.021
	Clan72	CYP72	Glyma.06G238500.1	59581	9.012
	Clan72	CYP72	Glyma.13G261700.1	59878	8.759
	Clan72	CYP72	Glyma.15G245300.1	59781.9	8.543
	Clan72	CYP72	Glyma.06G227300.2	59020.1	8.653
	Clan72	CYP72	Glyma.15G243300.2	58641.5	8.797
	Clan72	CYP72	Glyma.15G243300.5	59437.5	8.982
	Clan72	CYP72	Glyma.03G226800.1	59370.1	7.828
	Clan72	CYP72	Glyma.13G262000.1	61643.7	7.916
	Clan72	CYP72	Glyma.13G262100.1	59564.1	9.548
	Clan72	CYP72	Glyma.13G277100.1	60229.4	9.179
	Clan72	CYP72	Glyma.13G277100.2	60888.2	9.308
	Clan72	CYP72	Glyma.15G244250.2	59732.9	9.134
	Clan72	CYP72	Glyma.15G244250.3	59786.8	9.141
	Clan85	CYP720	Glyma.09G160900.1	55829.2	7.684
	Clan85	CYP720	Glyma.16G210300.1	55719.2	8.274
	Clan72	CYP721	Glyma.09G117400.2	58392.5	9.018
	Clan72	CYP721	Glyma.17G249400.1	58434.9	8.659
	Clan72	CYP721	Glyma.17G249400.2	58248.7	8.659
	Clan85	CYP722	Glyma.04G030100.2	55869.6	9.654
	Clan85	CYP722	Glyma.04G030100.3	52367.3	8.932
	Clan85	CYP722	Glyma.04G030100.4	51974	9.165
	Clan85	CYP722	Glyma.16G133800.1	56669	8.086
	Clan85	CYP724	Glyma.16G068100.1	53963	9.113
	Clan85	CYP724	Glyma.16G068100.2	50258.9	9.223
	Clan727	CYP727	Glyma.06G310800.1	65343.1	7.422
	Clan85	CYP728	Glyma.02G290000.1	53981.4	9.826
	Clan85	CYP728	Glyma.18G052400.1	55851.1	8.678
	Clan85	CYP733	Glyma.02G083200.1	54159.8	9.064
	Clan85	CYP733	Glyma.16G168900.1	50232.9	9.115
	Clan85	CYP733	Glyma.16G168600.1	50724.9	8.82
	Clan72	CYP734	Glyma.05G010200.1	59331.6	9.456
	Clan72	CYP734	Glyma.06G215200.1	60111.4	9.277
	Clan72	CYP734	Glyma.17G118100.1	58997.1	9.672
	Clan72	CYP735	Glyma.08G365000.1	58843.1	9.037
	Clan72	CYP735	Glyma.13G046400.1	58558.4	8.404
	Clan72	CYP735	Glyma.18G297200.1	58722.9	9.161
	Clan74	CYP74	Glyma.04G035000.1	58470.3	8.886
	Clan74	CYP74	Glyma.14G078600.1	47058.1	7.152
	Clan74	CYP74	Glyma.17G246500.1	58312.1	8.715
	Clan74	CYP74	Glyma.12G191400.1	53192	7.478
	Clan74	CYP74	Glyma.07G162900.1	58739.4	8.174
	Clan74	CYP74	Glyma.11G122700.1	53572.4	6.413
	Clan85	CYP85	Glyma.02G120700.1	53480.1	8.359
	Clan85	CYP85	Glyma.08G250000.1	53319.2	8.912
	Clan85	CYP85	Glyma.13G052900.3	57012.4	8.73
	Clan85	CYP85	Glyma.18G272300.1	53284	8.995
	Clan85	CYP85	Glyma.19G033900.1	53375.2	8.592
	Clan86	CYP86	Glyma.11G175900.1	59086.3	8.379
	Clan86	CYP86	Glyma.14G192500.1	61203	9.115
	Clan86	CYP86	Glyma.03G008100.2	60835.5	6.976
	Clan86	CYP86	Glyma.05G208900.1	60065.8	8.619
	Clan86	CYP86	Glyma.05G208981.1	59392	8.737
	Clan86	CYP86	Glyma.07G069500.1	60825.5	7.349
	Clan86	CYP86	Glyma.09G282700.1	64349.1	8.639
	Clan86	CYP86	Glyma.11G100100.1	65022.4	8.373
	Clan86	CYP86	Glyma.20G002700.1	63857.3	8.91
	Clan85	CYP87	Glyma.01G216900.1	55613.6	9.154
	Clan85	CYP87	Glyma.11G026200.1	55066.2	9.28
	Clan85	CYP88	Glyma.09G029400.1	57626.2	8.728
	Clan85	CYP88	Glyma.15G135200.1	57309.5	8.457
	Clan85	CYP90	Glyma.02G256800.1	54876.8	9.271
	Clan85	CYP90	Glyma.11G228900.1	53942.4	9.055
	Clan85	CYP90	Glyma.14G059900.1	54761.7	9.322
	Clan85	CYP90	Glyma.14G059900.2	50799.3	9.246
	Clan85	CYP90	Glyma.18G028300.1	54207.7	8.875
	Clan85	CYP90	Glyma.01G175500.1	55595.4	8.444
	Clan85	CYP90	Glyma.02G057500.1	56123.1	8.844
	Clan85	CYP90	Glyma.02G057500.2	56382.4	8.844
	Clan85	CYP90	Glyma.11G067700.1	55519.3	8.157
	Clan85	CYP90	Glyma.02G051600.1	55744.9	8.676
	Clan85	CYP90	Glyma.11G073300.1	56012.4	8.404
	Clan85	CYP90	Glyma.07G010700.1	54254.6	8.681
	Clan85	CYP90	Glyma.08G193900.1	54378	9.276
	Clan85	CYP90	Glyma.08G193900.2	51253.1	9.377
	Clan86	CYP94	Glyma.03G160100.1	58273.6	8.915
	Clan86	CYP94	Glyma.03G160200.1	58429.8	8.375
	Clan86	CYP94	Glyma.03G160300.1	59222.9	9.291
	Clan86	CYP94	Glyma.19G162100.1	58502.9	7.962
	Clan86	CYP94	Glyma.13G120500.1	56936.7	7.467
	Clan86	CYP94	Glyma.19G090800.1	57572.2	7.642
	Clan86	CYP94	Glyma.01G112400.1	57310.3	7.626
	Clan86	CYP94	Glyma.03G077600.1	57907.4	8.074
	Clan86	CYP94	Glyma.03G077800.1	57907.4	8.074
	Clan86	CYP94	Glyma.16G057100.1	58670.5	8.274
	Clan86	CYP94	Glyma.03G193500.1	62097.1	7.901
	Clan86	CYP94	Glyma.11G185700.1	57460.7	7.353
	Clan86	CYP94	Glyma.12G087200.1	57187.5	7.894
	Clan86	CYP94	Glyma.13G152202.1	59407.9	7.642
	Clan86	CYP94	Glyma.13G152202.2	56061.9	7.685
	Clan86	CYP94	Glyma.03G122300.1	56750.3	7.798
	Clan86	CYP96	Glyma.05G003000.1	58104.7	7.636
	Clan86	CYP96	Glyma.05G003100.1	57624	7.818
	Clan86	CYP96	Glyma.19G003600.1	58337.9	7.464
	Clan86	CYP96	Glyma.19G057300.1	58258.7	7.41
	Clan86	CYP96	Glyma.05G003200.1	58191.5	7.582
	Clan86	CYP96	Glyma.19G003400.2	57748.6	7.361
	Clan86	CYP96	Glyma.20G004700.1	58495.6	6.966
	Clan97	CYP97	Glyma.09G252800.1	70605.1	5.599
	Clan97	CYP97	Glyma.09G252800.2	58911.8	5.097
	Clan97	CYP97	Glyma.18G239900.1	71384.8	5.336
	Clan97	CYP97	Glyma.18G239900.2	52301.1	4.694
	Clan97	CYP97	Glyma.18G239900.3	64401.1	5.326
	Clan97	CYP97	Glyma.11G016200.1	64727.3	6.514
	Clan97	CYP97	Glyma.11G016200.2	48312.5	5.811
	Clan97	CYP97	Glyma.10G062900.1	60102	6.317
	Clan97	CYP97	Glyma.13G147500.1	59714.6	6.083
	Clan97	CYP97	Glyma.13G147500.2	58098.5	5.509

## Sheet: Subcellular localization
Subcellular localization of all soybean P450s
Type	Clan	Family	Glyma Id	Localization	Type
A-type	Clan71	CYP701	Glyma.13G371400.1	Endoplasmic reticulum	Membrane
	Clan71	CYP701	Glyma.15G002200.1	Endoplasmic reticulum	Membrane
	Clan71	CYP703	Glyma.12G160400.1	Endoplasmic reticulum	Membrane
	Clan71	CYP706	Glyma.07G218200.1	Endoplasmic reticulum	Membrane
	Clan71	CYP706	Glyma.17G134100.1	Endoplasmic reticulum	Membrane
	Clan71	CYP706	Glyma.17G134200.1	Endoplasmic reticulum	Membrane
	Clan71	CYP71	Glyma.01G179400.1	Endoplasmic reticulum	Membrane
	Clan71	CYP71	Glyma.01G179500.1	Endoplasmic reticulum	Membrane
	Clan71	CYP71	Glyma.01G179600.1	Endoplasmic reticulum	Membrane
	Clan71	CYP71	Glyma.01G179700.1	Endoplasmic reticulum	Membrane
	Clan71	CYP71	Glyma.02G156000.1	Endoplasmic reticulum	Membrane
	Clan71	CYP71	Glyma.02G156100.1	Endoplasmic reticulum	Membrane
	Clan71	CYP71	Glyma.02G235300.1	Endoplasmic reticulum	Membrane
	Clan71	CYP71	Glyma.02G298600.1	Endoplasmic reticulum	Membrane
	Clan71	CYP71	Glyma.02G298800.1	Endoplasmic reticulum	Membrane
	Clan71	CYP71	Glyma.04G110400.1	Endoplasmic reticulum	Membrane
	Clan71	CYP71	Glyma.05G042600.1	Endoplasmic reticulum	Membrane
	Clan71	CYP71	Glyma.05G042800.1	Endoplasmic reticulum	Membrane
	Clan71	CYP71	Glyma.06G176100.1	Endoplasmic reticulum	Membrane
	Clan71	CYP71	Glyma.06G176200.1	Endoplasmic reticulum	Membrane
	Clan71	CYP71	Glyma.07G159800.1	Peroxisome	Soluble
	Clan71	CYP71	Glyma.07G159800.6	Cytoplasm	Soluble
	Clan71	CYP71	Glyma.07G159800.7	Cytoplasm	Soluble
	Clan71	CYP71	Glyma.07G160700.1	Endoplasmic reticulum	Membrane
	Clan71	CYP71	Glyma.07G160700.4	Endoplasmic reticulum	Membrane
	Clan71	CYP71	Glyma.07G194300.1	Endoplasmic reticulum	Membrane
	Clan71	CYP71	Glyma.07G267100.1	Endoplasmic reticulum	Membrane
	Clan71	CYP71	Glyma.08G109900.1	Endoplasmic reticulum	Membrane
	Clan71	CYP71	Glyma.08G326900.1	Mitochondrion	Membrane
	Clan71	CYP71	Glyma.08G326900.3	Mitochondrion	Membrane
	Clan71	CYP71	Glyma.08G327100.1	Endoplasmic reticulum	Membrane
	Clan71	CYP71	Glyma.08G327200.1	Endoplasmic reticulum	Membrane
	Clan71	CYP71	Glyma.09G142200.1	Endoplasmic reticulum	Membrane
	Clan71	CYP71	Glyma.09G142500.1	Endoplasmic reticulum	Membrane
	Clan71	CYP71	Glyma.09G142900.1	Endoplasmic reticulum	Membrane
	Clan71	CYP71	Glyma.09G260900.1	Endoplasmic reticulum	Membrane
	Clan71	CYP71	Glyma.09G279100.1	Endoplasmic reticulum	Membrane
	Clan71	CYP71	Glyma.10G114600.1	Endoplasmic reticulum	Membrane
	Clan71	CYP71	Glyma.10G115300.1	Endoplasmic reticulum	Membrane
	Clan71	CYP71	Glyma.10G115400.1	Endoplasmic reticulum	Membrane
	Clan71	CYP71	Glyma.10G115500.1	Endoplasmic reticulum	Membrane
	Clan71	CYP71	Glyma.11G062500.1	Endoplasmic reticulum	Membrane
	Clan71	CYP71	Glyma.11G062600.1	Endoplasmic reticulum	Membrane
	Clan71	CYP71	Glyma.13G181900.1	Endoplasmic reticulum	Membrane
	Clan71	CYP71	Glyma.14G015100.1	Endoplasmic reticulum	Membrane
	Clan71	CYP71	Glyma.14G117200.1	Endoplasmic reticulum	Membrane
	Clan71	CYP71	Glyma.15G050300.1	Endoplasmic reticulum	Membrane
	Clan71	CYP71	Glyma.16G195500.1	Endoplasmic reticulum	Membrane
	Clan71	CYP71	Glyma.16G195600.1	Endoplasmic reticulum	Membrane
	Clan71	CYP71	Glyma.17G007200.1	Endoplasmic reticulum	Membrane
	Clan71	CYP71	Glyma.17G125300.1	Endoplasmic reticulum	Membrane
	Clan71	CYP71	Glyma.17G125400.1	Endoplasmic reticulum	Membrane
	Clan71	CYP71	Glyma.17G209100.1	Endoplasmic reticulum	Membrane
	Clan71	CYP71	Glyma.18G080200.1	Endoplasmic reticulum	Membrane
	Clan71	CYP71	Glyma.18G080200.2	Endoplasmic reticulum	Membrane
	Clan71	CYP71	Glyma.18G080300.1	Endoplasmic reticulum	Membrane
	Clan71	CYP71	Glyma.18G080400.1	Endoplasmic reticulum	Membrane
	Clan71	CYP71	Glyma.20G007000.1	Endoplasmic reticulum	Membrane
	Clan71	CYP71	Glyma.20G007100.1	Endoplasmic reticulum	Membrane
	Clan71	CYP712	Glyma.12G239100.1	Endoplasmic reticulum	Soluble
	Clan71	CYP712	Glyma.19G144600.1	Endoplasmic reticulum	Membrane
	Clan71	CYP73	Glyma.02G236500.1	Endoplasmic reticulum	Membrane
	Clan71	CYP73	Glyma.14G205200.1	Endoplasmic reticulum	Membrane
	Clan71	CYP73	Glyma.20G114200.1	Endoplasmic reticulum	Membrane
	Clan71	CYP736	Glyma.05G182800.2	Endoplasmic reticulum	Membrane
	Clan71	CYP736	Glyma.05G233200.1	Endoplasmic reticulum	Membrane
	Clan71	CYP736	Glyma.07G089700.1	Endoplasmic reticulum	Membrane
	Clan71	CYP736	Glyma.07G089800.1	Endoplasmic reticulum	Membrane
	Clan71	CYP736	Glyma.07G089900.1	Endoplasmic reticulum	Membrane
	Clan71	CYP736	Glyma.08G140400.2	Endoplasmic reticulum	Membrane
	Clan71	CYP736	Glyma.08G140500.1	Endoplasmic reticulum	Membrane
	Clan71	CYP736	Glyma.08G140600.1	Endoplasmic reticulum	Membrane
	Clan71	CYP736	Glyma.08G140600.2	Endoplasmic reticulum	Membrane
	Clan71	CYP736	Glyma.09G186000.1	Mitochondrion	Membrane
	Clan71	CYP736	Glyma.09G186200.1	Endoplasmic reticulum	Membrane
	Clan71	CYP736	Glyma.09G186300.1	Endoplasmic reticulum	Membrane
	Clan71	CYP736	Glyma.09G186400.1	Endoplasmic reticulum	Membrane
	Clan71	CYP736	Glyma.09G186500.1	Endoplasmic reticulum	Membrane
	Clan71	CYP75	Glyma.05G021800.1	Endoplasmic reticulum	Membrane
	Clan71	CYP75	Glyma.05G021900.1	Endoplasmic reticulum	Membrane
	Clan71	CYP75	Glyma.05G022100.1	Endoplasmic reticulum	Membrane
	Clan71	CYP75	Glyma.06G202300.1	Endoplasmic reticulum	Membrane
	Clan71	CYP75	Glyma.13G072100.1	Endoplasmic reticulum	Membrane
	Clan71	CYP75	Glyma.17G077700.3	Endoplasmic reticulum	Membrane
	Clan71	CYP75	Glyma.20G041700.2	Endoplasmic reticulum	Soluble
	Clan71	CYP76	Glyma.03G021200.1	Endoplasmic reticulum	Membrane
	Clan71	CYP76	Glyma.03G189900.1	Endoplasmic reticulum	Membrane
	Clan71	CYP76	Glyma.07G083000.1	Endoplasmic reticulum	Membrane
	Clan71	CYP76	Glyma.07G083000.2	Endoplasmic reticulum	Membrane
	Clan71	CYP76	Glyma.10G200800.1	Endoplasmic reticulum	Membrane
	Clan71	CYP76	Glyma.10G203500.1	Endoplasmic reticulum	Membrane
	Clan71	CYP76	Glyma.10G296400.1	Endoplasmic reticulum	Membrane
	Clan71	CYP76	Glyma.11G108300.1	Endoplasmic reticulum	Membrane
	Clan71	CYP76	Glyma.13G265300.1	Endoplasmic reticulum	Membrane
	Clan71	CYP76	Glyma.18G222900.1	Endoplasmic reticulum	Membrane
	Clan71	CYP76	Glyma.18G223100.1	Endoplasmic reticulum	Membrane
	Clan71	CYP76	Glyma.20G147900.1	Endoplasmic reticulum	Membrane
	Clan71	CYP76	Glyma.20G148000.1	Endoplasmic reticulum	Membrane
	Clan71	CYP76	Glyma.20G189600.1	Endoplasmic reticulum	Membrane
	Clan71	CYP77	Glyma.07G258800.1	Endoplasmic reticulum	Membrane
	Clan71	CYP77	Glyma.10G202400.1	Endoplasmic reticulum	Membrane
	Clan71	CYP77	Glyma.17G015400.1	Endoplasmic reticulum	Membrane
	Clan71	CYP77	Glyma.20G188000.1	Endoplasmic reticulum	Membrane
	Clan71	CYP78	Glyma.01G061100.1	Endoplasmic reticulum	Membrane
	Clan71	CYP78	Glyma.02G119600.1	Endoplasmic reticulum	Membrane
	Clan71	CYP78	Glyma.05G019200.1	Endoplasmic reticulum	Membrane
	Clan71	CYP78	Glyma.05G147100.1	Endoplasmic reticulum	Membrane
	Clan71	CYP78	Glyma.07G052300.1	Endoplasmic reticulum	Membrane
	Clan71	CYP78	Glyma.08G104100.1	Endoplasmic reticulum	Membrane
	Clan71	CYP78	Glyma.11G250200.1	Endoplasmic reticulum	Membrane
	Clan71	CYP78	Glyma.16G021200.1	Endoplasmic reticulum	Membrane
	Clan71	CYP78	Glyma.17G080500.1	Endoplasmic reticulum	Membrane
	Clan71	CYP78	Glyma.19G240800.1	Endoplasmic reticulum	Membrane
	Clan71	CYP78	Glyma.19G258700.1	Endoplasmic reticulum	Membrane
	Clan71	CYP79	Glyma.11G197300.1	Endoplasmic reticulum	Membrane
	Clan71	CYP79	Glyma.11G197400.1	Endoplasmic reticulum	Membrane
	Clan71	CYP79	Glyma.13G051600.1	Endoplasmic reticulum	Membrane
	Clan71	CYP79	Glyma.20G065000.1	Endoplasmic reticulum	Membrane
	Clan71	CYP79	Glyma.20G065100.1	Endoplasmic reticulum	Membrane
	Clan71	CYP81	Glyma.08G089400.1	Endoplasmic reticulum	Membrane
	Clan71	CYP81	Glyma.08G089500.1	Endoplasmic reticulum	Membrane
	Clan71	CYP81	Glyma.09G048700.2	Endoplasmic reticulum	Membrane
	Clan71	CYP81	Glyma.09G048800.1	Endoplasmic reticulum	Membrane
	Clan71	CYP81	Glyma.09G048900.1	Endoplasmic reticulum	Membrane
	Clan71	CYP81	Glyma.09G049100.1	Endoplasmic reticulum	Membrane
	Clan71	CYP81	Glyma.09G049200.1	Endoplasmic reticulum	Membrane
	Clan71	CYP81	Glyma.09G049300.1	Endoplasmic reticulum	Membrane
	Clan71	CYP81	Glyma.11G051800.1	Endoplasmic reticulum	Membrane
	Clan71	CYP81	Glyma.11G093100.1	Endoplasmic reticulum	Membrane
	Clan71	CYP81	Glyma.15G156100.1	Endoplasmic reticulum	Membrane
	Clan71	CYP81	Glyma.16G149300.2	Endoplasmic reticulum	Membrane
	Clan71	CYP82	Glyma.01G135200.1	Endoplasmic reticulum	Membrane
	Clan71	CYP82	Glyma.01G181800.1	Endoplasmic reticulum	Membrane
	Clan71	CYP82	Glyma.01G181900.1	Endoplasmic reticulum	Membrane
	Clan71	CYP82	Glyma.02G078800.1	Endoplasmic reticulum	Membrane
	Clan71	CYP82	Glyma.04G035500.1	Endoplasmic reticulum	Membrane
	Clan71	CYP82	Glyma.04G035600.1	Endoplasmic reticulum	Membrane
	Clan71	CYP82	Glyma.06G035200.1	Endoplasmic reticulum	Membrane
	Clan71	CYP82	Glyma.06G035300.1	Endoplasmic reticulum	Membrane
	Clan71	CYP82	Glyma.06G035400.1	Endoplasmic reticulum	Membrane
	Clan71	CYP82	Glyma.11G060100.1	Golgi apparatus	Membrane
	Clan71	CYP82	Glyma.11G060200.1	Endoplasmic reticulum	Membrane
	Clan71	CYP82	Glyma.13G068500.1	Golgi apparatus	Membrane
	Clan71	CYP82	Glyma.13G068800.2	Endoplasmic reticulum	Membrane
	Clan71	CYP82	Glyma.13G068800.4	Endoplasmic reticulum	Membrane
	Clan71	CYP82	Glyma.13G285300.3	Endoplasmic reticulum	Membrane
	Clan71	CYP82	Glyma.15G203500.1	Endoplasmic reticulum	Membrane
	Clan71	CYP82	Glyma.16G089700.1	Endoplasmic reticulum	Membrane
	Clan71	CYP82	Glyma.16G089900.1	Endoplasmic reticulum	Membrane
	Clan71	CYP82	Glyma.16G090000.1	Endoplasmic reticulum	Membrane
	Clan71	CYP82	Glyma.16G090000.2	Endoplasmic reticulum	Membrane
	Clan71	CYP82	Glyma.19G014600.1	Endoplasmic reticulum	Membrane
	Clan71	CYP82	Glyma.19G014700.1	Endoplasmic reticulum	Membrane
	Clan71	CYP82	Glyma.19G015000.1	Endoplasmic reticulum	Membrane
	Clan71	CYP82	Glyma.19G015200.1	Golgi apparatus	Membrane
	Clan71	CYP82	Glyma.19G015300.1	Endoplasmic reticulum	Membrane
	Clan71	CYP83	Glyma.01G078300.1	Endoplasmic reticulum	Membrane
	Clan71	CYP83	Glyma.03G029900.1	Endoplasmic reticulum	Membrane
	Clan71	CYP83	Glyma.03G030400.1	Endoplasmic reticulum	Membrane
	Clan71	CYP83	Glyma.03G030600.1	Endoplasmic reticulum	Membrane
	Clan71	CYP83	Glyma.03G030800.1	Endoplasmic reticulum	Membrane
	Clan71	CYP83	Glyma.03G030900.1	Endoplasmic reticulum	Membrane
	Clan71	CYP83	Glyma.03G031000.1	Endoplasmic reticulum	Membrane
	Clan71	CYP83	Glyma.03G031400.1	Endoplasmic reticulum	Membrane
	Clan71	CYP83	Glyma.11G168428.1	Endoplasmic reticulum	Membrane
	Clan71	CYP83	Glyma.17G255900.1	Endoplasmic reticulum	Membrane
	Clan71	CYP83	Glyma.18G100500.1	Endoplasmic reticulum	Membrane
	Clan71	CYP84	Glyma.01G169200.1	Endoplasmic reticulum	Membrane
	Clan71	CYP84	Glyma.11G074100.1	Endoplasmic reticulum	Membrane
	Clan71	CYP84	Glyma.16G131200.1	Endoplasmic reticulum	Membrane
	Clan71	CYP89	Glyma.07G220300.2	Endoplasmic reticulum	Membrane
	Clan71	CYP89	Glyma.07G220400.1	Endoplasmic reticulum	Membrane
	Clan71	CYP89	Glyma.07G220500.1	Endoplasmic reticulum	Membrane
	Clan71	CYP89	Glyma.12G013700.1	Endoplasmic reticulum	Membrane
	Clan71	CYP89	Glyma.20G018600.1	Endoplasmic reticulum	Membrane
	Clan71	CYP89	Glyma.20G018800.1	Endoplasmic reticulum	Membrane
	Clan71	CYP89	Glyma.20G018900.1	Endoplasmic reticulum	Membrane
	Clan71	CYP92	Glyma.07G039800.1	Endoplasmic reticulum	Membrane
	Clan71	CYP92	Glyma.16G008600.1	Endoplasmic reticulum	Membrane
	Clan71	CYP92	Glyma.16G008600.2	Endoplasmic reticulum	Membrane
	Clan71	CYP93	Glyma.02G176200.1	Endoplasmic reticulum	Membrane
	Clan71	CYP93	Glyma.03G142000.1	Endoplasmic reticulum	Membrane
	Clan71	CYP93	Glyma.03G142100.1	Endoplasmic reticulum	Membrane
	Clan71	CYP93	Glyma.03G143700.1	Endoplasmic reticulum	Membrane
	Clan71	CYP93	Glyma.07G202300.1	Endoplasmic reticulum	Membrane
	Clan71	CYP93	Glyma.08G350800.1	Endoplasmic reticulum	Membrane
	Clan71	CYP93	Glyma.08G350800.2	Endoplasmic reticulum	Membrane
	Clan71	CYP93	Glyma.10G092500.1	Endoplasmic reticulum	Membrane
	Clan71	CYP93	Glyma.10G092600.1	Endoplasmic reticulum	Membrane
	Clan71	CYP93	Glyma.12G067000.1	Endoplasmic reticulum	Membrane
	Clan71	CYP93	Glyma.12G067100.1	Endoplasmic reticulum	Membrane
	Clan71	CYP93	Glyma.13G173401.1	Endoplasmic reticulum	Membrane
	Clan71	CYP93	Glyma.13G173500.1	Endoplasmic reticulum	Membrane
	Clan71	CYP93	Glyma.19G144700.1	Endoplasmic reticulum	Membrane
	Clan71	CYP93	Glyma.19G146800.1	Endoplasmic reticulum	Membrane
	Clan71	CYP98	Glyma.03G122000.1	Endoplasmic reticulum	Membrane
	Clan71	CYP98	Glyma.19G126000.1	Endoplasmic reticulum	Membrane
Non-A-type	Clan51	CYP51	Glyma.03G115300.1	Endoplasmic reticulum	Membrane
	Clan51	CYP51	Glyma.07G110900.1	Endoplasmic reticulum	Membrane
	Clan710	CYP710	Glyma.13G217400.1	Endoplasmic reticulum	Membrane
	Clan710	CYP710	Glyma.15G095000.1	Endoplasmic reticulum	Membrane
	Clan711	CYP711	Glyma.04G052100.3	Endoplasmic reticulum	Membrane
	Clan711	CYP711	Glyma.06G052700.1	Endoplasmic reticulum	Membrane
	Clan711	CYP711	Glyma.17G227500.1	Endoplasmic reticulum	Membrane
	Clan711	CYP711	Glyma.17G227500.2	Endoplasmic reticulum	Membrane
	Clan72	CYP714	Glyma.06G140000.1	Endoplasmic reticulum	Membrane
	Clan72	CYP714	Glyma.07G118200.1	Endoplasmic reticulum	Membrane
	Clan72	CYP714	Glyma.18G049500.1	Endoplasmic reticulum	Membrane
	Clan72	CYP714	Glyma.18G218500.3	Endoplasmic reticulum	Membrane
	Clan72	CYP714	Glyma.18G218600.1	Endoplasmic reticulum	Membrane
	Clan72	CYP714	Glyma.18G218600.2	Endoplasmic reticulum	Membrane
	Clan72	CYP715	Glyma.09G137600.1	Endoplasmic reticulum	Membrane
	Clan72	CYP715	Glyma.10G234600.1	Endoplasmic reticulum	Membrane
	Clan72	CYP715	Glyma.10G234700.1	Endoplasmic reticulum	Membrane
	Clan72	CYP715	Glyma.16G182600.1	Endoplasmic reticulum	Membrane
	Clan72	CYP715	Glyma.20G159700.1	Endoplasmic reticulum	Membrane
	Clan72	CYP72	Glyma.03G226800.1	Endoplasmic reticulum	Membrane
	Clan72	CYP72	Glyma.06G227300.2	Endoplasmic reticulum	Membrane
	Clan72	CYP72	Glyma.06G238500.1	Endoplasmic reticulum	Membrane
	Clan72	CYP72	Glyma.08G238100.1	Endoplasmic reticulum	Membrane
	Clan72	CYP72	Glyma.13G261700.1	Endoplasmic reticulum	Membrane
	Clan72	CYP72	Glyma.13G262000.1	Endoplasmic reticulum	Membrane
	Clan72	CYP72	Glyma.13G262100.1	Endoplasmic reticulum	Membrane
	Clan72	CYP72	Glyma.13G277100.1	Endoplasmic reticulum	Membrane
	Clan72	CYP72	Glyma.13G277100.2	Endoplasmic reticulum	Membrane
	Clan72	CYP72	Glyma.15G243300.2	Endoplasmic reticulum	Membrane
	Clan72	CYP72	Glyma.15G243300.5	Endoplasmic reticulum	Membrane
	Clan72	CYP72	Glyma.15G244250.2	Endoplasmic reticulum	Membrane
	Clan72	CYP72	Glyma.15G244250.3	Endoplasmic reticulum	Membrane
	Clan72	CYP72	Glyma.15G245300.1	Endoplasmic reticulum	Membrane
	Clan72	CYP721	Glyma.09G117400.2	Endoplasmic reticulum	Membrane
	Clan72	CYP721	Glyma.17G249400.1	Endoplasmic reticulum	Membrane
	Clan72	CYP721	Glyma.17G249400.2	Endoplasmic reticulum	Membrane
	Clan72	CYP734	Glyma.05G010200.1	Endoplasmic reticulum	Membrane
	Clan72	CYP734	Glyma.06G215200.1	Endoplasmic reticulum	Membrane
	Clan72	CYP734	Glyma.17G118100.1	Endoplasmic reticulum	Membrane
	Clan72	CYP735	Glyma.08G365000.1	Endoplasmic reticulum	Membrane
	Clan72	CYP735	Glyma.13G046400.1	Endoplasmic reticulum	Membrane
	Clan72	CYP735	Glyma.18G297200.1	Endoplasmic reticulum	Membrane
	Clan727	CYP727	Glyma.06G310800.1	Endoplasmic reticulum	Membrane
	Clan74	CYP74	Glyma.04G035000.1	Plastid	Soluble
	Clan74	CYP74	Glyma.07G162900.1	Plastid	Membrane
	Clan74	CYP74	Glyma.11G122700.1	Peroxisome	Soluble
	Clan74	CYP74	Glyma.12G191400.1	Peroxisome	Membrane
	Clan74	CYP74	Glyma.14G078600.1	Peroxisome	Soluble
	Clan74	CYP74	Glyma.17G246500.1	Plastid	Soluble
	Clan85	CYP707	Glyma.01G153300.1	Endoplasmic reticulum	Membrane
	Clan85	CYP707	Glyma.02G132200.1	Endoplasmic reticulum	Membrane
	Clan85	CYP707	Glyma.07G212700.1	Endoplasmic reticulum	Membrane
	Clan85	CYP707	Glyma.09G218600.1	Endoplasmic reticulum	Membrane
	Clan85	CYP707	Glyma.09G282900.1	Endoplasmic reticulum	Membrane
	Clan85	CYP707	Glyma.14G082900.1	Endoplasmic reticulum	Membrane
	Clan85	CYP707	Glyma.16G076600.1	Endoplasmic reticulum	Membrane
	Clan85	CYP707	Glyma.16G109300.1	Endoplasmic reticulum	Membrane
	Clan85	CYP707	Glyma.17G133900.1	Endoplasmic reticulum	Membrane
	Clan85	CYP707	Glyma.17G242200.1	Golgi apparatus	Membrane
	Clan85	CYP716	Glyma.05G166900.1	Endoplasmic reticulum	Membrane
	Clan85	CYP716	Glyma.05G220500.1	Endoplasmic reticulum	Membrane
	Clan85	CYP716	Glyma.08G026900.1	Endoplasmic reticulum	Membrane
	Clan85	CYP716	Glyma.08G125000.1	Endoplasmic reticulum	Membrane
	Clan85	CYP716	Glyma.08G125100.2	Endoplasmic reticulum	Membrane
	Clan85	CYP716	Glyma.08G243600.1	Endoplasmic reticulum	Membrane
	Clan85	CYP718	Glyma.02G287300.1	Endoplasmic reticulum	Membrane
	Clan85	CYP720	Glyma.09G160900.1	Endoplasmic reticulum	Membrane
	Clan85	CYP720	Glyma.16G210300.1	Endoplasmic reticulum	Membrane
	Clan85	CYP722	Glyma.04G030100.2	Golgi apparatus	Membrane
	Clan85	CYP722	Glyma.04G030100.3	Golgi apparatus	Membrane
	Clan85	CYP722	Glyma.04G030100.4	Golgi apparatus	Membrane
	Clan85	CYP722	Glyma.16G133800.1	Endoplasmic reticulum	Membrane
	Clan85	CYP724	Glyma.16G068100.1	Endoplasmic reticulum	Membrane
	Clan85	CYP724	Glyma.16G068100.2	Endoplasmic reticulum	Membrane
	Clan85	CYP728	Glyma.02G290000.1	Endoplasmic reticulum	Membrane
	Clan85	CYP728	Glyma.18G052400.1	Endoplasmic reticulum	Membrane
	Clan85	CYP733	Glyma.02G083200.1	Endoplasmic reticulum	Membrane
	Clan85	CYP733	Glyma.16G168600.1	Endoplasmic reticulum	Membrane
	Clan85	CYP733	Glyma.16G168900.1	Golgi apparatus	Membrane
	Clan85	CYP85	Glyma.02G120700.1	Endoplasmic reticulum	Membrane
	Clan85	CYP85	Glyma.08G250000.1	Endoplasmic reticulum	Membrane
	Clan85	CYP85	Glyma.13G052900.3	Cell membrane	Membrane
	Clan85	CYP85	Glyma.18G272300.1	Endoplasmic reticulum	Membrane
	Clan85	CYP85	Glyma.19G033900.1	Endoplasmic reticulum	Membrane
	Clan85	CYP87	Glyma.01G216900.1	Endoplasmic reticulum	Membrane
	Clan85	CYP87	Glyma.11G026200.1	Endoplasmic reticulum	Membrane
	Clan85	CYP88	Glyma.09G029400.1	Endoplasmic reticulum	Membrane
	Clan85	CYP88	Glyma.15G135200.1	Endoplasmic reticulum	Membrane
	Clan85	CYP90	Glyma.01G175500.1	Endoplasmic reticulum	Membrane
	Clan85	CYP90	Glyma.02G051600.1	Endoplasmic reticulum	Membrane
	Clan85	CYP90	Glyma.02G057500.1	Endoplasmic reticulum	Membrane
	Clan85	CYP90	Glyma.02G057500.2	Endoplasmic reticulum	Membrane
	Clan85	CYP90	Glyma.02G256800.1	Endoplasmic reticulum	Membrane
	Clan85	CYP90	Glyma.07G010700.1	Endoplasmic reticulum	Membrane
	Clan85	CYP90	Glyma.08G193900.1	Endoplasmic reticulum	Membrane
	Clan85	CYP90	Glyma.08G193900.2	Nucleus	Soluble
	Clan85	CYP90	Glyma.11G067700.1	Endoplasmic reticulum	Membrane
	Clan85	CYP90	Glyma.11G073300.1	Endoplasmic reticulum	Membrane
	Clan85	CYP90	Glyma.11G228900.1	Endoplasmic reticulum	Membrane
	Clan85	CYP90	Glyma.14G059900.1	Endoplasmic reticulum	Membrane
	Clan85	CYP90	Glyma.14G059900.2	Endoplasmic reticulum	Membrane
	Clan85	CYP90	Glyma.18G028300.1	Endoplasmic reticulum	Membrane
	Clan86	CYP704	Glyma.03G020400.1	Endoplasmic reticulum	Membrane
	Clan86	CYP704	Glyma.03G021600.1	Endoplasmic reticulum	Membrane
	Clan86	CYP704	Glyma.07G043300.1	Endoplasmic reticulum	Membrane
	Clan86	CYP704	Glyma.07G083200.1	Endoplasmic reticulum	Membrane
	Clan86	CYP704	Glyma.07G083300.1	Endoplasmic reticulum	Membrane
	Clan86	CYP86	Glyma.03G008100.2	Endoplasmic reticulum	Membrane
	Clan86	CYP86	Glyma.05G208900.1	Endoplasmic reticulum	Membrane
	Clan86	CYP86	Glyma.05G208981.1	Mitochondrion	Membrane
	Clan86	CYP86	Glyma.07G069500.1	Endoplasmic reticulum	Membrane
	Clan86	CYP86	Glyma.09G282700.1	Endoplasmic reticulum	Membrane
	Clan86	CYP86	Glyma.11G100100.1	Endoplasmic reticulum	Membrane
	Clan86	CYP86	Glyma.11G175900.1	Endoplasmic reticulum	Membrane
	Clan86	CYP86	Glyma.14G192500.1	Endoplasmic reticulum	Membrane
	Clan86	CYP86	Glyma.20G002700.1	Endoplasmic reticulum	Membrane
	Clan86	CYP94	Glyma.01G112400.1	Plastid	Soluble
	Clan86	CYP94	Glyma.03G077600.1	Endoplasmic reticulum	Membrane
	Clan86	CYP94	Glyma.03G077800.1	Endoplasmic reticulum	Membrane
	Clan86	CYP94	Glyma.03G122300.1	Endoplasmic reticulum	Membrane
	Clan86	CYP94	Glyma.03G160100.1	Endoplasmic reticulum	Membrane
	Clan86	CYP94	Glyma.03G160200.1	Endoplasmic reticulum	Membrane
	Clan86	CYP94	Glyma.03G160300.1	Endoplasmic reticulum	Membrane
	Clan86	CYP94	Glyma.03G193500.1	Endoplasmic reticulum	Membrane
	Clan86	CYP94	Glyma.11G185700.1	Endoplasmic reticulum	Membrane
	Clan86	CYP94	Glyma.12G087200.1	Endoplasmic reticulum	Membrane
	Clan86	CYP94	Glyma.13G120500.1	Endoplasmic reticulum	Membrane
	Clan86	CYP94	Glyma.13G152202.1	Endoplasmic reticulum	Membrane
	Clan86	CYP94	Glyma.13G152202.2	Endoplasmic reticulum	Membrane
	Clan86	CYP94	Glyma.16G057100.1	Endoplasmic reticulum	Membrane
	Clan86	CYP94	Glyma.19G090800.1	Endoplasmic reticulum	Membrane
	Clan86	CYP94	Glyma.19G162100.1	Endoplasmic reticulum	Membrane
	Clan86	CYP96	Glyma.05G003000.1	Endoplasmic reticulum	Membrane
	Clan86	CYP96	Glyma.05G003100.1	Endoplasmic reticulum	Membrane
	Clan86	CYP96	Glyma.05G003200.1	Endoplasmic reticulum	Membrane
	Clan86	CYP96	Glyma.19G003400.2	Endoplasmic reticulum	Membrane
	Clan86	CYP96	Glyma.19G003600.1	Endoplasmic reticulum	Membrane
	Clan86	CYP96	Glyma.19G057300.1	Endoplasmic reticulum	Membrane
	Clan86	CYP96	Glyma.20G004700.1	Endoplasmic reticulum	Membrane
	Clan97	CYP97	Glyma.09G252800.1	Plastid	Soluble
	Clan97	CYP97	Glyma.09G252800.2	Cytoplasm	Soluble
	Clan97	CYP97	Glyma.10G062900.1	Plastid	Soluble
	Clan97	CYP97	Glyma.11G016200.1	Plastid	Soluble
	Clan97	CYP97	Glyma.11G016200.2	Cytoplasm	Soluble
	Clan97	CYP97	Glyma.13G147500.1	Plastid	Soluble
	Clan97	CYP97	Glyma.13G147500.2	Plastid	Soluble
	Clan97	CYP97	Glyma.18G239900.1	Plastid	Soluble
	Clan97	CYP97	Glyma.18G239900.2	Endoplasmic reticulum	Membrane
	Clan97	CYP97	Glyma.18G239900.3	Plastid	Membrane
