# Supplementary material for: Comprehensive Analysis of Cytochrome P450 Monooxygenases Reveals Insight Into Their Role in Partial Resistance Against Phytophthora sojae in Soybean
Source: Front Plant Sci. 2022 Apr 14;13:862314. doi: 10.3389/fpls.2022.862314 (PMC9048032; doi:10.3389/fpls.2022.862314)
Supplement: Supplementary Table 5 — The detailed analysis of conserved P450 motifs in GmP450s. [file Table_5.xlsx]

## Sheet: Motifs in each GmP450
Presence of conserved P450 motifs in GmP450s
					Motifs																																	Spacing
Type	Clan	GmP450 Family	Glyma ID		PPGP Ist Motif					(A/G)GX(E/D)T(T/S) 2nd motif							EXXR 3rd motif					PERF 4th motif					FXXGXRXCXG 5th motif											2nd-1st	3rd-2nd	4th-3rd	5th-4th
A-type	Clan71	CYP701	Glyma.13G371400.1		P	P	V	P		E	T	S	D	T	T		E	T	L	R		P	E	R	F		F	G	A	G	K	R	V	C	A	G		270	50	51	15
	Clan71	CYP701	Glyma.15G002200.1		P	P	V	P		G	T	S	D	T	T		E	T	L	R		P	E	R	F		F	G	A	G	K	R	V	C	A	G		270	50	51	15
	Clan71	CYP703	Glyma.12G160400.1		P	P	G	P		A	A	T	D	T	S		E	T	F	R		P	E	R	H		F	S	A	G	K	R	K	C	P	G		273	51	51	22
	Clan71	CYP706	Glyma.07G218200.1		P	P	G	P		G	G	T	E	T	T		E	T	L	R		P	E	R	F		F	G	S	G	R	R	I	C	A	G		267	52	51	19
	Clan71	CYP706	Glyma.17G134100.1		P	P	G	P		G	G	T	D	T	S		E	T	L	R		P	T	R	F		F	G	S	G	R	R	I	C	A	G		264	51	51	16
	Clan71	CYP706	Glyma.17G134200.1		P	P	G	P		G	G	T	D	T	S		E	T	L	R		P	T	R	F		F	G	S	G	R	R	I	C	A	G		267	51	51	16
	Clan71	CYP71	Glyma.05G042600.1		P	P	S	P		G	G	T	D	T	T		E	T	L	R		P	E	R	F		F	G	F	G	R	R	G	C	P	G		267	51	51	17
	Clan71	CYP71	Glyma.17G125400.1		P	P	S	L		G	G	T	D	T	T		E	I	L	R		P	E	R	F		F	G	F	G	R	R	G	C	P	G		267	51	51	17
	Clan71	CYP71	Glyma.04G110400.1		P	P	S	P		A	G	S	E	T	T		E	T	L	R		P	E	R	H		F	G	F	G	R	R	A	C	P	G		262	51	51	16
	Clan71	CYP71	Glyma.02G235300.1		P	P	G	P		A	G	T	D	T	S		E	T	L	R		P	E	R	F		F	G	A	G	R	R	I	C	P	G		258	51	51	16
	Clan71	CYP71	Glyma.06G176100.1		P	P	S	P		G	G	S	D	T	T		E	T	L	R		P	E	R	F		F	G	I	G	R	R	G	C	P	A		264	53	51	16
	Clan71	CYP71	Glyma.06G176200.1		P	P	S	P		G	G	S	D	T	T		E	T	L	R		P	E	R	F		F	G	S	G	R	R	G	C	P	A		269	53	51	16
	Clan71	CYP71	Glyma.07G194300.1		P	P	S	P		A	G	T	D	T	T		E	S	L	R		P	E	R	F		F	G	A	G	R	R	G	C	P	G		269	51	51	16
	Clan71	CYP71	Glyma.13G181900.1		P	P	S	P		A	A	T	D	T	T		E	S	L	R		P	E	R	F		F	G	A	G	R	R	G	C	P	A		269	50	51	16
	Clan71	CYP71	Glyma.09G142200.1		P	P	S	P		A	G	T	E	T	T		E	T	F	R		P	E	R	F		F	G	A	G	R	R	S	C	P	G		267	51	51	16
	Clan71	CYP71	Glyma.09G142500.1		P	P	S	P		A	G	T	E	T	T		E	T	F	R		P	E	R	F		F	G	A	G	R	R	S	C	P	G		267	51	51	16
	Clan71	CYP71	Glyma.09G142900.1		P	P	S	P		A	G	T	D	T	T		E	I	L	R		P	E	R	F		F	G	A	G	R	R	G	C	P	G		272	51	51	16
	Clan71	CYP71	Glyma.09G260900.1		P	P	S	P		A	G	T	D	T	I		E	T	L	R		P	E	R	H		F	G	A	G	R	R	G	C	P	G		262	55	51	16
	Clan71	CYP71	Glyma.16G195500.1		P	K	L	P		A	G	T	D	T	T		E	T	F	R		P	E	R	F		F	G	A	G	R	R	S	C	P	G		262	51	51	16
	Clan71	CYP71	Glyma.16G195600.1		P	P	S	P		A	G	T	E	T	T		E	T	F	R		P	E	R	F		F	G	A	G	R	R	A	C	P	G		270	51	51	16
	Clan71	CYP71	Glyma.02G298800.1		P	P	G	P		A	G	S	E	T	T		E	T	L	R		P	E	R	F		F	G	A	G	R	R	I	C	P	G		264	51	51	16
	Clan71	CYP71	Glyma.01G179600.1		P	P	G	P		A	G	I	D	T	S		E	T	L	R		P	E	R	F		F	G	A	G	R	R	I	C	P	G		267	51	51	16
	Clan71	CYP71	Glyma.05G042800.1		P	P	G	P		A	G	T	D	T	A		E	V	L	R		P	E	R	F		F	G	V	G	R	R	G	C	P	G		263	51	51	16
	Clan71	CYP71	Glyma.07G160700.1		P	P	G	P		A	G	G	E	T	S		E	T	L	R		P	E	R	F		F	G	S	G	R	R	I	C	P	G		266	51	46	21
	Clan71	CYP71	Glyma.07G160700.4		P	P	G	P		A	G	G	E	T	S		E	T	L	R		P	E	R	F		F	G	S	G	R	R	I	C	P	G		266	51	46	21
	Clan71	CYP71	Glyma.08G327100.1		P	H	G	P		A	G	G	E	T	T		E	T	L	R		P	E	R	F		F	G	A	G	R	R	I	C	A	G		264	51	51	16
	Clan71	CYP71	Glyma.08G327200.1		P	H	G	P		A	G	G	E	T	S		E	T	L	R		P	E	R	F		F	G	A	G	R	R	I	C	P	G		263	51	51	16
	Clan71	CYP71	Glyma.09G279100.1		P	P	G	P		A	G	G	E	P	S		E	T	L	R		P	E	R	F		F	G	A	G	R	R	I	C	P	G		261	51	46	21
	Clan71	CYP71	Glyma.14G117200.1		P	R	G	P		G	G	I	D	A	V		E	T	L	R		P	E	R	F		F	G	A	G	R	R	I	C	P	G		266	51	46	21
	Clan71	CYP71	Glyma.17G209100.1		P	P	G	P		G	G	V	E	P	I		E	T	L	R		P	E	R	F		F	G	A	G	R	R	I	C	P	G		267	51	46	21
	Clan71	CYP71	Glyma.20G007100.1		P	P	G	P		A	G	G	E	T	S		E	T	L	R		P	E	R	F		F	G	A	G	R	R	I	C	P	G		267	51	51	16
	Clan71	CYP71	Glyma.18G080200.1		P	P	G	P		G	G	T	Q	T	S		E	T	L	R		P	E	R	F		F	G	A	G	R	R	I	C	P	G		259	52	51	16
	Clan71	CYP71	Glyma.18G080200.2		P	P	G	P		G	G	T	Q	T	S		E	T	L	R		P	E	R	F		F	G	A	G	R	R	I	C	P	G		259	23	51	16
	Clan71	CYP71	Glyma.01G179400.1		P	P	G	P		A	G	T	D	T	S		E	T	L	R		P	E	R	F		F	G	A	G	R	R	M	C	P	G		267	51	51	16
	Clan71	CYP71	Glyma.02G156000.1		P	P	G	P		A	G	T	D	T	S		E	T	F	R		P	E	R	F		F	G	G	G	R	R	I	C	P	G		268	51	51	16
	Clan71	CYP71	Glyma.02G156100.1		P	P	G	P		A	G	T	D	T	S		E	T	L	R		P	E	R	F		F	G	G	G	R	R	I	C	P	G		268	51	51	16
	Clan71	CYP71	Glyma.02G298600.1		P	P	G	P		G	G	G	E	T	S		E	A	M	R		P	E	R	F		F	G	A	G	R	R	I	C	P	G		261	51	51	16
	Clan71	CYP71	Glyma.08G326900.1		P	P	G	P		G	G	T	Q	T	S		E	T	L	R		P	E	R	F		F	G	A	G	R	R	I	C	P	G		259	52	51	16
	Clan71	CYP71	Glyma.08G326900.3		K	T	G	P		G	G	T	Q	T	S		E	T	L	R		P	E	R	F		F	G	A	G	R	R	I	C	P	G		259	52	51	16
	Clan71	CYP71	Glyma.10G115300.1		P	P	G	P		A	G	T	D	T	S		E	T	F	R		P	E	R	F		F	G	G	G	R	R	I	C	P	G		268	51	51	16
	Clan71	CYP71	Glyma.10G115400.1		P	P	G	P		A	G	T	D	T	S		E	T	F	R		P	E	R	F		F	G	G	G	R	R	I	C	P	G		268	51	51	16
	Clan71	CYP71	Glyma.10G115500.1		P	P	G	P		A	G	T	D	T	S		E	T	F	R		P	E	R	F		F	G	G	G	R	R	I	C	P	G		268	51	51	16
	Clan71	CYP71	Glyma.11G062600.1		P	P	G	P		A	G	T	D	T	S		E	T	L	R		P	E	R	F		F	G	A	G	R	R	M	C	P	G		268	51	50	16
	Clan71	CYP71	Glyma.14G015100.1		P	P	G	P		A	G	S	D	T	S		E	T	L	R		P	E	R	F		F	G	A	G	R	R	I	C	P	G		263	51	51	16
	Clan71	CYP71	Glyma.01G179500.1		P	P	G	P		A	G	T	D	T	S		E	T	L	R		P	E	R	F		F	G	A	G	R	R	M	C	P	G		267	51	51	16
	Clan71	CYP71	Glyma.01G179700.1		P	P	S	P		S	G	T	D	T	P		E	T	L	R		P	E	R	F		F	G	A	G	R	R	M	C	P	G		267	51	50	16
	Clan71	CYP71	Glyma.07G267100.1		P	P	G	P		A	G	T	D	T	S		E	T	M	R		P	E	R	F		F	G	A	G	R	R	M	C	P	G		263	51	51	16
	Clan71	CYP71	Glyma.08G109900.1		P	P	G	P		G	G	T	A	A	P		E	T	M	R		P	E	R	F		F	G	A	G	R	R	I	C	P	G		260	51	51	16
	Clan71	CYP71	Glyma.11G062500.1		P	P	G	P		A	G	T	D	T	S		E	T	L	R		P	E	R	F		F	G	A	G	R	R	M	C	P	G		269	51	50	16
	Clan71	CYP71	Glyma.17G007200.1		P	P	G	P		A	G	T	D	T	S		E	T	M	R		P	E	R	F		F	G	A	G	R	R	M	C	P	G		262	47	51	16
	Clan71	CYP71	Glyma.18G080400.1		P	P	G	P		G	G	S	D	T	S		E	T	L	R		P	E	R	F		F	G	A	G	R	R	M	C	P	G		258	51	51	16
	Clan71	CYP71	Glyma.20G007000.1		P	P	G	P		A	G	G	D	T	A		E	T	L	R		P	E	R	F		F	G	A	G	R	R	I	C	P	G		263	51	51	16
	Clan71	CYP71	Glyma.07G159800.1		P	Y	G	N		A	G	G	E	T	A		E	T	L	R		P	E	R	F		F	G	A	G	R	R	L	C	P	G		179	51	46	21
	Clan71	CYP71	Glyma.07G159800.6		P	Y	G	N		A	G	G	E	T	A		E	T	L	R		P	E	R	F		F	G	A	G	R	R	L	C	P	G		179	51	46	21
	Clan71	CYP71	Glyma.07G159800.7		P	Y	G	N		A	G	G	E	T	A		E	T	L	R		P	E	R	F		F	G	A	G	R	R	L	C	P	G		179	51	46	21
	Clan71	CYP71	Glyma.10G114600.1		P	P	G	P		A	G	T	D	T	S		E	T	F	R		P	E	R	F		F	G	G	G	R	R	I	C	P	G		269	51	51	16
	Clan71	CYP71	Glyma.15G050300.1		P	P	G	P		G	G	G	E	T	S		E	T	M	R		P	E	R	F		F	G	A	G	R	R	I	C	P	G		264	51	51	16
	Clan71	CYP71	Glyma.17G125300.1		P	P	S	P		G	G	T	D	T	S		E	T	L	R		P	E	R	F		F	G	F	G	R	R	G	C	P	G		262	51	51	16
	Clan71	CYP71	Glyma.18G080300.1		P	P	G	P		A	G	S	G	T	S		E	T	L	R		P	E	R	F		F	G	A	G	R	R	M	C	P	G		262	51	51	16
	Clan71	CYP712	Glyma.12G239100.1		P	P	S	P		A	G	T	H	T	S		E	T	L	R		P	E	R	F		F	G	G	G	R	R	G	C	P	G		269	51	50	22
	Clan71	CYP712	Glyma.19G144600.1		P	P	S	P		A	G	T	E	T	S		E	V	L	R		P	E	R	F		F	G	F	G	R	R	G	C	P	G		265	51	50	13
	Clan71	CYP73	Glyma.02G236500.1		P	P	G	P		A	A	I	E	T	T		E	T	L	R		P	E	R	F		F	G	V	G	R	R	S	C	P	G		269	51	51	18
	Clan71	CYP73	Glyma.14G205200.1		P	P	G	P		A	A	I	E	T	T		E	T	L	R		P	E	R	F		F	G	V	G	R	R	S	C	P	G		268	51	51	18
	Clan71	CYP73	Glyma.20G114200.1		P	P	G	P		A	A	I	E	T	T		E	T	L	R		P	E	R	F		F	G	V	G	R	R	S	C	P	G		267	50	51	21
	Clan71	CYP736	Glyma.07G089900.1		P	P	G	P		G	A	S	E	T	S		E	T	L	R		P	E	R	F		F	G	S	G	R	R	S	C	P	G		266	51	52	16
	Clan71	CYP736	Glyma.09G186200.1		P	P	G	P		G	S	F	D	T	S		E	T	L	R		P	E	R	F		F	G	S	G	R	R	G	C	P	G		266	51	52	16
	Clan71	CYP736	Glyma.09G186300.1		P	P	G	P		G	S	F	D	T	S		E	T	L	R		P	E	R	F		F	G	S	G	R	R	G	C	P	G		266	51	52	16
	Clan71	CYP736	Glyma.09G186400.1		P	P	G	P		G	S	F	D	T	S		E	T	L	R		P	E	R	F		F	G	S	G	R	R	G	C	P	G		267	51	52	16
	Clan71	CYP736	Glyma.09G186000.1		P	P	G	P		G	S	S	E	T	S		E	T	L	R		P	E	R	F		F	G	S	G	R	T	S	C	P	G		198	42	52	16
	Clan71	CYP736	Glyma.07G089700.1		P	P	G	P		G	A	Y	D	T	S		E	T	L	R		P	E	R	F		F	G	S	G	R	R	G	C	P	G		262	51	52	16
	Clan71	CYP736	Glyma.08G140500.1		P	P	G	P		G	S	I	D	T	S		E	G	L	R		P	E	R	F		F	G	S	G	R	R	V	C	P	G		264	51	51	16
	Clan71	CYP736	Glyma.05G233200.1		P	P	G	P		G	A	F	E	T	S		E	T	L	R		P	E	R	F		F	G	F	G	R	R	G	C	P	G		271	51	51	16
	Clan71	CYP736	Glyma.07G089800.1		P	P	G	P		A	A	I	D	T	S		E	T	L	R		P	E	R	F		F	G	S	G	R	R	G	C	P	G		267	51	52	16
	Clan71	CYP736	Glyma.08G140600.1		P	P	G	P		G	S	M	D	T	S		E	N	M	R		P	E	R	F		F	G	S	G	R	R	A	C	P	G		265	51	51	16
	Clan71	CYP736	Glyma.05G182800.2		P	P	G	P		G	S	M	D	T	S		E	S	M	R		P	E	R	F		F	G	S	G	R	R	G	C	P	G		263	51	51	16
	Clan71	CYP736	Glyma.08G140400.2		P	P	G	P		A	G	S	M	D	T		E	S	M	R		P	E	R	F		F	G	S	G	R	R	A	C	P	G		262	52	51	16
	Clan71	CYP736	Glyma.08G140600.2		P	P	G	P		G	S	M	D	T	S		E	N	M	R		P	E	R	F		F	G	S	G	R	R	A	C	P	G		177	51	51	16
	Clan71	CYP736	Glyma.09G186500.1		A	P	G	P		A	A	F	D	T	S		E	T	L	R		P	K	R	F		F	G	S	G	R	R	G	C	P	G		270	51	51	16
	Clan71	CYP75	Glyma.13G072100.1		P	P	G	P		A	G	T	D	T	S		E	T	Y	R		P	E	R	F		F	G	A	G	R	R	I	C	A	G		264	51	51	19
	Clan71	CYP75	Glyma.20G041700.2		P	P	N	A		A	G	T	D	T	S		E	T	M	R		P	E	R	F		F	G	A	G	R	R	V	C	A	G		198	51	51	19
	Clan71	CYP75	Glyma.05G021800.1		P	P	G	P		A	G	T	D	T	S		E	T	L	R		P	E	R	F		F	G	A	G	R	R	I	C	V	G		264	51	51	20
	Clan71	CYP75	Glyma.05G021900.1		P	P	G	P		A	G	T	D	T	S		E	T	L	R		P	E	R	F		F	G	A	G	R	R	I	C	V	G		264	51	51	20
	Clan71	CYP75	Glyma.05G022100.1		P	P	G	P		A	G	T	D	T	S		E	T	L	R		P	E	R	F		F	G	A	G	R	R	I	C	V	G		264	51	51	20
	Clan71	CYP75	Glyma.06G202300.1		P	P	G	P		A	G	T	D	T	S		E	T	F	R		P	E	R	F		F	G	A	G	R	R	I	C	A	G		267	51	51	20
	Clan71	CYP75	Glyma.17G077700.3		P	P	G	P		A	G	T	D	T	S		E	T	F	R		P	E	R	F		F	G	A	G	R	R	I	C	V	G		265	51	51	20
	Clan71	CYP76	Glyma.03G189900.1		P	P	G	P		A	G	S	E	T	T		E	T	L	R		P	E	R	F		F	G	A	G	R	R	M	C	A	G		270	51	51	17
	Clan71	CYP76	Glyma.07G083000.1		P	P	G	P		A	G	I	D	T	T		E	T	F	R		P	E	R	F		F	G	A	G	R	R	I	C	P	G		265	51	51	16
	Clan71	CYP76	Glyma.07G083000.2		P	P	G	P		A	G	I	D	T	T		E	T	F	R		P	E	R	F		F	G	A	G	R	R	I	C	P	G		235	51	51	16
	Clan71	CYP76	Glyma.10G200800.1		P	P	G	P		A	G	T	D	T	T		E	S	L	R		P	E	R	F		F	G	S	G	R	R	I	C	P	G		262	51	51	16
	Clan71	CYP76	Glyma.20G189600.1		P	P	G	P		A	G	T	D	T	T		E	S	L	R		P	E	R	F		F	G	S	G	R	R	I	C	P	G		262	51	51	16
	Clan71	CYP76	Glyma.03G021200.1		P	P	G	P		A	G	I	D	T	T		E	T	F	R		P	E	R	F		F	G	A	G	R	R	I	C	P	G		265	51	51	16
	Clan71	CYP76	Glyma.10G203500.1		P	P	G	P		A	G	T	D	T	T		E	T	F	R		P	E	R	F		F	G	A	G	R	R	I	C	P	G		262	51	51	16
	Clan71	CYP76	Glyma.11G108300.1		P	P	G	P		A	G	T	D	T	I		E	T	F	R		P	E	R	F		F	G	A	G	R	R	I	C	L	G		262	51	53	18
	Clan71	CYP76	Glyma.13G265300.1		P	P	G	P		A	G	T	D	T	T		E	T	L	R		P	E	R	F		F	G	G	G	R	R	I	C	P	G		260	51	51	16
	Clan71	CYP76	Glyma.18G222900.1		P	P	G	P		A	G	V	D	T	T		E	T	L	R		P	E	R	F		F	G	A	G	K	R	I	C	P	G		266	51	51	16
	Clan71	CYP76	Glyma.18G223100.1		P	P	G	P		A	G	I	D	T	T		E	T	L	R		P	E	R	F		F	G	A	G	K	R	I	C	P	G		264	51	51	16
	Clan71	CYP76	Glyma.20G147900.1		P	P	G	P		A	G	T	D	T	T		E	T	L	R		P	D	R	F		Y	G	A	G	R	R	I	C	P	G		260	51	51	16
	Clan71	CYP76	Glyma.20G148000.1		P	P	G	P		A	G	T	D	T	T		E	T	L	R		P	D	R	F		F	G	A	G	R	R	I	C	P	G		260	52	51	16
	Clan71	CYP76	Glyma.10G296400.1		P	P	G	P		A	G	T	D	T	T		E	T	L	R		P	E	R	F		F	G	S	G	R	R	M	C	P	A		270	51	51	17
	Clan71	CYP77	Glyma.10G202400.1		P	P	G	P		G	G	T	D	T	T		E	L	L	R		P	E	R	F		F	G	V	G	R	R	I	C	P	G		268	50	51	19
	Clan71	CYP77	Glyma.20G188000.1		P	P	G	P		G	G	T	D	T	T		E	L	L	R		P	E	R	F		F	G	V	G	R	R	I	C	P	G		268	50	51	19
	Clan71	CYP77	Glyma.07G258800.1		P	P	G	P		A	G	T	D	T	S		E	T	F	R		P	E	R	F		F	G	V	G	R	R	I	C	P	A		267	51	51	20
	Clan71	CYP77	Glyma.17G015400.1		P	P	G	P		A	G	T	D	T	S		E	T	F	R		P	E	R	F		F	G	V	G	R	R	I	C	P	A		273	51	51	20
	Clan71	CYP78	Glyma.05G019200.1		P	G	P	C		R	G	T	D	T	V		E	T	L	R		P	E	R	F		F	G	A	G	R	R	V	C	P	G		269	51	52	17
	Clan71	CYP78	Glyma.17G080500.1		P	G	P	S		R	G	T	D	T	V		E	T	L	R		P	E	R	F		F	G	S	G	R	R	V	C	P	G		268	51	52	17
	Clan71	CYP78	Glyma.01G061100.1		P	G	P	V		R	G	T	D	T	V		E	T	L	R		P	E	R	F		F	G	S	G	R	R	V	C	P	G		259	51	48	22
	Clan71	CYP78	Glyma.02G119600.1		P	G	P	V		R	G	T	D	T	V		E	T	L	R		P	E	R	F		F	G	S	G	R	R	V	C	P	G		259	51	53	16
	Clan71	CYP78	Glyma.05G147100.1		P	M	G	W		R	G	T	D	T	V		E	V	L	R		P	E	R	F		F	G	A	G	R	R	V	C	P	G		248	51	52	16
	Clan71	CYP78	Glyma.08G104100.1		P	M	G	W		R	G	T	D	T	V		E	V	L	R		P	E	R	F		F	G	A	G	R	R	V	C	P	G		248	51	52	16
	Clan71	CYP78	Glyma.11G250200.1		P	M	G	W		R	G	T	D	T	I		E	V	L	R		P	E	R	F		F	G	A	G	R	R	V	C	P	G		253	51	52	16
	Clan71	CYP78	Glyma.19G240800.1		P	G	P	V		R	G	T	D	T	V		E	T	L	R		P	E	R	F		F	G	S	G	R	R	V	C	P	G		259	51	53	16
	Clan71	CYP78	Glyma.07G052300.1		P	G	P	K		R	G	T	D	T	V		E	V	L	R		P	E	R	F		F	G	S	G	R	R	T	C	P	G		254	52	52	18
	Clan71	CYP78	Glyma.16G021200.1		P	G	P	R		R	G	T	D	T	V		E	V	L	R		P	E	R	F		F	G	S	G	R	R	T	C	P	G		256	50	52	18
	Clan71	CYP78	Glyma.19G258700.1		P	G	P	K		R	G	T	D	T	V		E	V	L	R		P	E	R	F		F	G	S	G	R	R	A	C	P	G		255	51	52	20
	Clan71	CYP79	Glyma.11G197400.1		P	P	G	P		G	G	A	D	N	P		E	A	F	R		P	E	R	H		F	G	T	G	R	R	G	C	P	A		277	51	52	19
	Clan71	CYP79	Glyma.11G197300.1		P	P	G	P		A	T	I	D	N	P		E	A	F	R		P	E	R	H		F	S	T	G	R	R	G	C	P	G		279	51	51	19
	Clan71	CYP79	Glyma.13G051600.1		P	P	G	P		A	T	I	D	N	P		E	A	L	R		P	E	R	H		F	S	T	G	R	R	G	C	P	G		279	51	51	19
	Clan71	CYP79	Glyma.20G065000.1		P	P	G	P		A	A	M	D	N	P		E	A	F	R		P	E	R	H		F	S	T	G	R	R	G	C	P	G		279	51	52	18
	Clan71	CYP79	Glyma.20G065100.1		P	P	G	P		A	G	V	D	N	P		E	A	F	R		P	E	R	H		F	S	T	G	R	R	G	C	P	A		282	51	52	20
	Clan71	CYP81	Glyma.08G089500.1		P	P	G	P		A	A	T	D	S	Q		E	T	L	R		P	E	R	F		F	G	L	G	R	R	A	C	P	G		269	51	51	11
	Clan71	CYP81	Glyma.09G048700.2		P	P	G	P		A	G	T	D	S	S		E	T	L	R		P	E	R	F		F	G	M	G	R	R	A	C	P	G		265	51	51	11
	Clan71	CYP81	Glyma.09G048800.1		P	P	G	P		A	G	T	D	S	S		E	T	L	R		P	E	R	F		F	G	M	G	R	R	A	C	P	G		266	51	51	11
	Clan71	CYP81	Glyma.09G048900.1		P	P	G	P		G	G	T	D	S	S		E	T	L	R		P	E	R	F		F	G	M	G	R	R	A	C	P	G		267	51	51	11
	Clan71	CYP81	Glyma.09G049200.1		P	P	G	P		G	G	T	D	S	S		E	T	L	R		P	E	R	F		F	G	M	G	R	R	A	C	P	G		266	51	51	11
	Clan71	CYP81	Glyma.09G049300.1		P	P	G	P		G	G	T	D	S	S		E	T	L	R		P	E	R	F		F	G	M	G	R	R	A	C	P	G		266	51	51	11
	Clan71	CYP81	Glyma.15G156100.1		P	P	G	P		G	G	T	D	S	S		E	T	L	R		P	E	R	F		F	G	M	G	R	R	A	C	P	G		268	51	51	11
	Clan71	CYP81	Glyma.09G049100.1		P	P	G	P		G	G	T	D	S	S		E	T	L	R		P	E	R	F		F	G	M	G	R	R	A	C	P	G		265	51	51	11
	Clan71	CYP81	Glyma.11G051800.1		A	P	S	P		A	G	T	E	T	S		E	T	L	R		P	E	R	F		F	G	L	G	R	R	A	C	P	G		265	51	51	12
	Clan71	CYP81	Glyma.16G149300.2		P	P	G	P		A	G	T	D	T	S		E	T	L	R		P	E	R	F		F	G	L	G	R	R	A	C	P	G		265	51	51	11
	Clan71	CYP81	Glyma.08G089400.1		P	P	C	P		A	G	T	D	T	T		E	T	L	R		P	E	R	F		F	G	L	G	R	R	A	C	P	G		265	51	51	11
	Clan71	CYP81	Glyma.11G093100.1		P	P	S	P		A	G	S	E	T	S		E	T	L	R		P	E	R	F		F	G	I	G	R	R	A	C	P	G		274	51	51	13
	Clan71	CYP82	Glyma.01G135200.1		P	Y	G	P		A	G	T	E	A	S		E	T	F	R		P	D	R	F		F	G	S	G	R	R	V	C	P	G		189	51	51	18
	Clan71	CYP82	Glyma.13G068500.1		P	I	L	G		G	G	T	E	T	N		E	T	F	R		P	E	R	F		F	G	G	G	R	R	V	C	P	G		271	51	51	18
	Clan71	CYP82	Glyma.16G089700.1		P	F	I	G		T	A	S	G	S	T		E	T	L	R		P	E	R	F		F	S	I	G	R	R	S	C	P	G		274	51	51	18
	Clan71	CYP82	Glyma.16G089900.1		P	F	I	G		T	A	S	G	S	T		E	T	L	R		P	E	R	F		F	S	I	G	R	R	S	C	P	G		274	51	51	18
	Clan71	CYP82	Glyma.01G181800.1		P	I	V	G		A	G	G	D	S	I		E	T	M	R		P	E	R	F		F	G	S	G	R	R	V	C	P	G		272	51	52	18
	Clan71	CYP82	Glyma.01G181900.1		P	I	I	G		A	G	T	D	P	T		E	T	L	R		P	E	R	F		F	S	S	G	R	R	A	C	P	G		275	51	52	18
	Clan71	CYP82	Glyma.02G078800.1		P	I	L	G		G	G	T	D	T	S		E	S	L	R		P	E	R	F		F	G	S	G	R	R	I	C	P	G		271	51	51	18
	Clan71	CYP82	Glyma.04G035500.1		P	L	I	G		G	A	T	D	T	T		E	T	L	R		P	E	R	F		F	G	G	G	R	R	S	C	P	G		272	51	51	18
	Clan71	CYP82	Glyma.04G035600.1		P	L	I	G		G	G	S	D	T	T		E	T	L	R		P	E	R	F		F	G	S	G	R	R	S	C	P	G		275	51	51	17
	Clan71	CYP82	Glyma.06G035200.1		P	L	I	G		A	G	M	D	T	T		E	T	L	R		P	E	R	F		F	G	A	G	R	R	M	C	P	G		271	51	51	18
	Clan71	CYP82	Glyma.06G035300.1		P	L	I	G		A	G	S	D	T	T		E	T	L	R		P	E	R	F		F	G	A	G	R	R	M	C	P	G		264	51	51	18
	Clan71	CYP82	Glyma.06G035400.1		P	L	I	G		A	A	T	D	T	T		E	T	M	R		P	E	R	F		F	G	G	G	R	R	S	C	P	G		272	51	51	18
	Clan71	CYP82	Glyma.11G060100.1		P	I	I	G		A	G	S	D	T	T		E	T	M	R		P	G	R	F		F	G	S	G	R	R	A	C	P	G		274	51	52	18
	Clan71	CYP82	Glyma.11G060200.1		P	I	I	G		A	G	T	D	P	T		E	T	L	R		P	E	R	F		F	S	S	G	R	R	A	C	P	G		278	51	52	18
	Clan71	CYP82	Glyma.13G068800.2		P	I	L	G		G	G	T	D	S	T		E	T	L	R		P	E	R	F		F	G	S	G	R	R	V	C	A	G		273	51	51	18
	Clan71	CYP82	Glyma.13G068800.4		P	I	L	G		G	G	T	D	S	T		E	T	L	R		P	E	R	F		F	G	S	G	R	R	V	C	A	G		273	51	51	18
	Clan71	CYP82	Glyma.13G285300.3		P	I	I	G		A	G	T	E	A	S		E	T	L	R		P	E	R	F		F	G	G	G	R	R	I	C	P	G		269	51	51	18
	Clan71	CYP82	Glyma.15G203500.1		P	I	I	G		A	A	T	E	A	S		E	T	L	R		P	E	R	F		F	G	S	G	R	R	I	C	P	G		269	51	51	18
	Clan71	CYP82	Glyma.16G090000.1		P	L	I	G		A	G	S	D	T	T		E	T	L	R		P	E	R	F		F	G	S	G	R	R	A	C	P	G		269	52	51	17
	Clan71	CYP82	Glyma.16G090000.2		P	L	I	G		A	G	S	D	T	T		E	T	L	R		P	E	R	F		F	G	S	G	R	R	A	C	P	G		241	52	51	17
	Clan71	CYP82	Glyma.19G014600.1		P	I	L	G		G	G	T	D	T	T		E	T	L	R		P	E	R	F		F	G	S	G	R	R	V	C	A	G		273	51	51	18
	Clan71	CYP82	Glyma.19G014700.1		P	I	L	G		G	A	T	D	T	T		E	T	L	R		P	E	R	F		F	G	G	G	R	R	I	C	P	G		270	51	51	18
	Clan71	CYP82	Glyma.19G015000.1		P	I	L	G		G	G	A	D	T	T		E	T	L	R		P	E	R	F		F	G	S	G	R	R	I	C	P	G		274	51	51	18
	Clan71	CYP82	Glyma.19G015200.1		P	I	L	G		G	G	T	E	S	I		E	T	L	R		P	E	R	F		F	G	G	G	R	R	V	C	P	G		273	51	51	18
	Clan71	CYP82	Glyma.19G015300.1		P	I	L	G		G	G	T	E	S	I		E	T	L	R		P	E	R	F		F	G	G	G	R	R	G	C	P	G		273	51	51	18
	Clan71	CYP83	Glyma.01G078300.1		P	P	G	P		A	G	T	D	T	S		E	T	M	R		P	E	R	F		F	G	A	G	R	R	I	C	P	G		267	51	51	16
	Clan71	CYP83	Glyma.03G030400.1		P	P	G	P		A	A	T	D	P	T		E	T	L	R		P	E	R	F		F	G	A	G	R	R	S	C	P	G		265	51	51	16
	Clan71	CYP83	Glyma.03G030600.1		P	P	G	P		A	A	T	D	T	T		E	T	L	R		P	E	R	F		F	G	A	G	R	R	I	C	P	G		265	51	51	16
	Clan71	CYP83	Glyma.03G030800.1		P	P	G	P		A	A	T	D	T	T		E	T	L	R		P	E	R	F		F	G	A	G	R	R	I	C	P	G		265	51	51	16
	Clan71	CYP83	Glyma.03G030900.1		P	P	L	P		A	A	T	D	T	T		E	T	L	R		P	E	R	F		F	G	A	G	R	R	I	C	P	G		269	51	51	16
	Clan71	CYP83	Glyma.03G031000.1		P	P	G	P		A	G	T	D	T	T		E	T	L	R		P	E	R	F		F	G	A	G	R	R	I	C	P	G		265	51	51	16
	Clan71	CYP83	Glyma.03G031400.1		P	P	G	P		A	G	T	D	T	T		E	T	F	R		P	E	R	F		F	G	T	G	R	R	S	C	P	G		265	51	51	16
	Clan71	CYP83	Glyma.11G168428.1		P	P	G	P		A	G	T	D	T	T		E	A	I	R		P	E	R	F		F	G	A	G	R	R	I	C	P	G		268	65	36	16
	Clan71	CYP83	Glyma.17G255900.1		P	P	G	P		A	G	T	D	P	S		E	T	L	R		P	E	R	F		F	G	S	G	R	R	M	C	P	A		282	51	51	17
	Clan71	CYP83	Glyma.18G100500.1		P	P	G	P		A	G	T	D	T	S		E	T	M	R		P	E	R	F		F	G	T	G	R	R	I	C	P	G		267	51	51	16
	Clan71	CYP83	Glyma.03G029900.1		P	P	G	P		G	A	T	G	T	T		E	T	L	R		P	E	R	F		F	G	A	G	R	R	L	C	P	G		265	51	51	16
	Clan71	CYP84	Glyma.01G169200.1		P	P	G	P		G	G	T	E	T	V		E	T	L	R		P	A	R	F		F	G	S	G	R	R	S	C	P	G		273	51	50	17
	Clan71	CYP84	Glyma.11G074100.1		P	P	G	P		G	G	T	E	T	V		E	T	L	R		P	A	R	F		F	G	S	G	R	R	S	C	P	G		274	51	50	17
	Clan71	CYP84	Glyma.16G131200.1		P	P	G	P		G	G	T	E	T	V		E	T	L	R		P	S	R	F		F	G	S	G	R	R	S	C	P	G		270	51	50	17
	Clan71	CYP89	Glyma.07G220300.2		P	P	G	P		A	G	S	D	T	T		E	G	L	R		P	E	R	F		F	G	A	G	R	R	I	C	P	G		262	55	51	18
	Clan71	CYP89	Glyma.07G220400.1		P	P	G	P		A	G	T	D	T	T		E	G	L	R		P	E	R	F		F	G	A	G	R	R	I	C	P	A		271	53	50	18
	Clan71	CYP89	Glyma.07G220500.1		P	P	G	P		A	G	T	D	T	T		E	G	L	R		P	E	R	F		F	G	A	G	R	R	I	C	P	G		268	52	51	18
	Clan71	CYP89	Glyma.12G013700.1		P	P	G	P		A	G	S	D	T	T		E	G	L	R		P	E	R	F		F	G	A	G	R	R	M	C	P	G		269	54	51	24
	Clan71	CYP89	Glyma.20G018600.1		P	P	G	P		A	G	T	D	T	T		E	G	L	R		P	E	R	F		F	G	A	G	R	R	I	C	P	G		264	55	51	18
	Clan71	CYP89	Glyma.20G018800.1		P	P	G	P		A	G	T	D	T	T		E	G	L	R		P	E	R	F		F	G	A	G	R	R	I	C	P	G		272	55	51	20
	Clan71	CYP89	Glyma.20G018900.1		P	P	G	P		A	G	T	D	T	T		E	G	L	R		P	E	R	F		F	G	A	G	R	R	I	C	P	G		270	53	51	20
	Clan71	CYP92	Glyma.07G039800.1		P	P	G	P		G	G	T	E	S	S		E	A	M	R		P	E	R	F		F	G	A	G	R	R	M	C	P	G		267	51	51	16
	Clan71	CYP92	Glyma.16G008600.1		P	P	G	P		G	G	T	E	S	S		E	A	M	R		P	E	R	F		F	G	A	G	R	R	M	C	P	G		267	51	51	16
	Clan71	CYP92	Glyma.16G008600.2		P	P	G	P		G	G	T	E	S	S		E	A	M	R		P	E	R	F		F	G	A	G	R	R	M	C	P	G		267	51	51	16
	Clan71	CYP93	Glyma.03G142000.1		P	P	S	P		A	G	T	D	T	A		E	T	L	R		P	E	R	F		F	G	S	G	R	R	G	C	P	G		271	51	50	22
	Clan71	CYP93	Glyma.03G143700.1		P	P	S	P		A	G	T	D	T	S		E	T	L	R		P	E	R	F		F	G	S	G	R	R	T	C	P	G		272	51	50	19
	Clan71	CYP93	Glyma.19G146800.1		P	P	S	P		A	G	T	D	T	S		E	T	L	R		P	E	R	F		F	G	S	G	R	R	T	C	P	G		272	51	50	19
	Clan71	CYP93	Glyma.19G144700.1		P	P	S	P		A	G	T	D	T	S		E	T	L	R		P	E	R	F		F	G	S	G	R	R	S	C	P	G		265	51	50	19
	Clan71	CYP93	Glyma.02G176200.1		P	P	S	P		G	G	T	D	T	T		E	T	L	R		P	E	R	F		F	G	S	G	R	R	G	C	P	G		266	51	50	24
	Clan71	CYP93	Glyma.03G142100.1		P	P	S	P		A	G	T	D	T	S		E	T	L	R		P	E	R	F		F	G	S	G	R	R	A	C	P	G		271	51	50	19
	Clan71	CYP93	Glyma.10G092500.1		P	P	G	P		A	G	T	D	T	S		E	T	L	R		P	E	R	F		F	G	T	G	R	R	L	C	P	G		269	51	50	20
	Clan71	CYP93	Glyma.10G092600.1		P	P	S	P		A	G	T	E	T	S		E	T	M	R		P	E	R	F		F	G	A	G	R	R	S	C	P	G		268	51	50	20
	Clan71	CYP93	Glyma.12G067000.1		P	P	S	P		A	A	T	D	T	T		E	T	M	R		P	E	R	F		F	G	S	G	R	R	G	C	P	G		273	51	50	19
	Clan71	CYP93	Glyma.12G067100.1		P	P	S	P		A	A	T	D	T	T		E	T	M	R		P	E	R	F		F	G	S	G	R	R	G	C	P	G		273	51	50	19
	Clan71	CYP93	Glyma.07G202300.1		P	P	S	P		A	G	T	D	S	T		E	T	F	R		P	E	R	F		F	G	S	G	R	R	M	C	P	G		265	51	50	23
	Clan71	CYP93	Glyma.13G173401.1		P	P	S	P		A	G	T	D	S	T		E	T	F	R		P	E	R	F		F	G	S	G	R	R	M	C	P	G		265	51	50	23
	Clan71	CYP93	Glyma.13G173500.1		P	P	S	P		A	G	T	D	S	T		E	T	F	R		P	E	R	F		F	G	S	G	R	R	M	C	P	G		265	51	50	23
	Clan71	CYP93	Glyma.08G350800.1		P	G	P	P		A	G	T	N	G	P		E	T	L	R		P	E	R	F		F	G	S	G	R	R	S	C	P	G		268	51	50	22
	Clan71	CYP93	Glyma.08G350800.2		P	G	P	P		A	G	T	N	G	P		E	T	L	R		P	E	R	F		F	G	S	G	R	R	S	C	P	G		222	51	50	22
	Clan71	CYP98	Glyma.03G122000.1		P	P	G	P		A	G	M	D	T	T		E	A	M	R		P	E	R	F		F	G	A	G	R	R	V	C	P	G		267	51	51	16
	Clan71	CYP98	Glyma.19G126000.1		P	P	G	P		A	G	M	D	T	T		E	A	M	R		P	E	R	F		F	G	S	G	R	R	V	C	P	G		267	51	51	16
Non-A-type	Clan51	CYP51	Glyma.03G115300.1		P	P	I	V		A	G	Q	H	T	S		E	A	L	R		P	D	R	F		F	G	G	G	R	H	G	C	L	G		243	52	55	17
	Clan51	CYP51	Glyma.07G110900.1		P	P	I	V		A	G	Q	H	T	S		E	A	L	R		P	D	R	F		F	G	G	G	R	H	G	C	L	G		243	52	55	17
	Clan710	CYP710	Glyma.13G217400.1		P	G	P	S		Q	D	A	S	T	S		E	V	L	R		P	N	R	F		F	G	A	G	P	H	Q	C	V	G		266	51	49	16
	Clan710	CYP710	Glyma.15G095000.1		P	G	P	S		Q	D	A	S	T	S		E	V	V	R		P	D	R	F		F	G	A	G	P	H	Q	C	V	G		267	51	44	21
	Clan711	CYP711	Glyma.04G052100.3		P	G	P	P		A	G	S	A	T	T		E	A	M	R		P	D	R	F		F	G	I	G	P	R	A	C	I	G		298	52	50	17
	Clan711	CYP711	Glyma.06G052700.1		P	G	P	P		A	G	S	A	T	T		E	A	M	R		P	E	R	F		F	G	I	G	P	R	A	C	I	G		299	52	50	17
	Clan711	CYP711	Glyma.17G227500.1		P	G	P	P		A	G	S	A	T	T		E	A	M	R		P	E	R	F		F	G	I	G	P	R	A	C	I	G		290	52	50	17
	Clan711	CYP711	Glyma.17G227500.2		P	G	P	P		A	G	S	A	T	T		E	A	M	R		P	E	R	F		F	G	I	G	P	R	A	C	I	G		290	52	50	17
	Clan72	CYP714	Glyma.06G140000.1		P	P	P	S		A	G	H	E	T	T		E	V	L	R		P	E	R	F		F	G	L	G	T	R	L	C	L	G		289	50	51	16
	Clan72	CYP714	Glyma.18G218500.3		P	K	P	S		A	G	S	E	S	T		E	S	L	R		P	E	R	F		F	G	L	G	S	R	I	C	L	G		289	54	51	16
	Clan72	CYP714	Glyma.18G218600.1		P	K	P	S		A	G	Y	E	S	S		E	S	L	R		P	E	R	F		F	G	L	G	G	R	I	C	L	G		285	54	52	16
	Clan72	CYP714	Glyma.18G218600.2		P	K	P	S		E	G	Y	E	S	S		E	S	L	R		P	E	R	F		F	G	L	G	G	R	I	C	L	G		250	54	52	16
	Clan72	CYP714	Glyma.07G118200.1		P	S	P	H		A	G	H	E	T	T		E	T	L	R		P	E	R	F		F	G	I	G	A	R	V	C	V	G		283	50	51	16
	Clan72	CYP714	Glyma.18G049500.1		P	P	P	T		A	G	Y	E	T	T		E	S	L	R		P	E	R	F		F	G	V	G	P	R	V	C	L	G		272	50	51	16
	Clan72	CYP715	Glyma.09G137600.1		P	S	F	P		A	G	H	E	T	T		E	V	L	R		P	E	R	F		F	G	F	G	G	R	M	C	V	G		274	50	51	16
	Clan72	CYP715	Glyma.10G234600.1		P	T	F	P		G	G	H	E	T	T		E	V	L	R		P	E	R	F		F	G	F	G	G	R	M	C	V	G		274	51	51	16
	Clan72	CYP715	Glyma.10G234700.1		P	S	F	P		G	G	H	E	T	T		E	V	L	R		P	E	R	F		F	G	F	G	G	R	M	C	V	G		272	51	51	16
	Clan72	CYP715	Glyma.16G182600.1		P	S	F	P		A	G	H	E	T	T		E	V	L	R		P	E	R	F		F	G	F	G	G	R	M	C	V	G		273	50	51	16
	Clan72	CYP715	Glyma.20G159700.1		P	S	F	P		G	G	H	E	T	T		E	V	L	R		P	E	R	F		F	G	F	G	G	R	M	C	V	G		274	51	51	16
	Clan72	CYP72	Glyma.08G238100.1		P	K	R	I		A	G	Q	E	A	N		E	S	L	R		P	E	R	F		F	G	W	G	P	R	L	C	I	G		290	50	51	16
	Clan72	CYP72	Glyma.06G238500.1		P	K	R	F		A	G	Q	E	T	T		E	V	L	R		P	E	R	F		F	G	W	G	P	R	I	C	I	G		290	50	51	16
	Clan72	CYP72	Glyma.13G261700.1		P	K	R	L		A	G	Q	E	T	T		E	V	L	R		P	E	R	F		F	G	W	G	P	R	V	C	L	G		296	50	51	16
	Clan72	CYP72	Glyma.15G245300.1		P	K	K	L		A	G	Q	E	A	T		E	V	L	R		P	E	R	F		F	G	R	G	P	R	V	C	I	G		295	50	51	16
	Clan72	CYP72	Glyma.06G227300.2		P	K	R	A		A	G	Q	E	T	T		E	V	L	R		P	E	R	F		F	A	W	G	P	R	I	C	I	G		291	50	51	16
	Clan72	CYP72	Glyma.15G243300.2		P	K	R	L		A	G	Q	D	T	T		E	V	L	R		P	E	R	F		F	G	G	G	P	R	I	C	I	A		282	50	51	16
	Clan72	CYP72	Glyma.15G243300.5		P	K	R	L		A	G	Q	D	T	T		E	V	L	R		P	E	R	F		F	G	G	G	P	R	I	C	I	A		282	50	51	16
	Clan72	CYP72	Glyma.03G226800.1		P	K	R	L		A	G	Q	E	T	T		E	V	L	R		P	E	R	F		F	G	W	G	P	R	I	C	I	G		291	50	51	16
	Clan72	CYP72	Glyma.13G262000.1		P	K	R	L		A	G	Q	E	T	T		E	V	L	R		P	E	R	F		F	G	G	G	P	R	I	C	I	G		291	50	51	16
	Clan72	CYP72	Glyma.13G262100.1		P	K	R	L		A	G	Q	E	T	T		E	V	L	R		P	E	R	F		F	G	G	G	P	R	I	C	I	G		292	50	51	16
	Clan72	CYP72	Glyma.13G277100.1		P	K	R	L		A	G	Q	E	T	T		E	V	L	R		P	E	R	F		F	G	W	G	P	R	I	C	I	G		291	50	51	16
	Clan72	CYP72	Glyma.13G277100.2		P	K	R	L		A	G	Q	E	T	T		E	V	L	R		P	E	R	F		F	G	W	G	P	R	I	C	I	G		291	50	51	16
	Clan72	CYP72	Glyma.15G244250.2		P	K	R	L		A	G	Q	E	T	T		E	V	L	R		P	E	R	F		F	G	W	G	P	R	I	C	I	G		293	50	51	16
	Clan72	CYP72	Glyma.15G244250.3		P	K	R	L		A	G	Q	E	T	T		E	V	L	R		P	E	R	F		F	G	W	G	P	R	I	C	I	G		293	50	51	16
	Clan72	CYP721	Glyma.09G117400.2		P	G	Y	R		A	G	K	E	T	T		E	T	L	R		P	M	R	F		F	G	L	G	P	R	I	C	V	G		273	51	51	12
	Clan72	CYP721	Glyma.17G249400.1		P	S	Y	R		A	G	K	E	T	S		E	T	L	R		P	M	R	F		F	G	L	G	P	N	Y	C	V	G		269	53	51	12
	Clan72	CYP721	Glyma.17G249400.2		P	S	Y	R		A	G	K	E	T	S		E	T	L	R		P	M	R	F		F	G	L	G	P	N	Y	C	V	G		269	51	51	12
	Clan72	CYP734	Glyma.05G010200.1		P	P	Y	R		A	G	K	Q	T	T		E	S	L	R		P	G	R	F		F	G	V	G	V	R	T	C	I	G		276	51	51	16
	Clan72	CYP734	Glyma.06G215200.1		P	P	Y	R		A	G	K	H	T	T		E	S	L	R		P	G	R	F		F	G	L	G	A	R	T	C	I	G		278	51	51	16
	Clan72	CYP734	Glyma.17G118100.1		P	P	Y	R		A	G	K	Q	T	T		E	S	L	R		P	G	R	F		F	G	L	G	V	R	T	C	I	G		270	51	51	16
	Clan72	CYP735	Glyma.08G365000.1		P	K	P	C		A	G	H	E	T	T		E	S	M	R		P	E	R	F		F	A	S	G	P	R	N	C	V	G		280	50	51	12
	Clan72	CYP735	Glyma.13G046400.1		P	K	P	R		A	G	H	E	T	T		E	S	M	R		P	E	R	F		F	A	S	G	P	R	N	C	V	G		273	50	51	12
	Clan72	CYP735	Glyma.18G297200.1		P	K	P	R		A	G	H	E	T	T		E	S	M	R		P	E	R	F		F	A	S	G	P	R	N	C	V	G		280	50	51	12
	Clan727	CYP727	Glyma.06G310800.1		P	P	S	P		H	G	C	Q	T	T		E	S	A	R		P	Y	H	F		F	G	S	G	T	R	A	C	I	G		273	51	53	35
	Clan74	CYP74	Glyma.04G035000.1		P	P	G	P		N	S	F	G	G	M		E	A	F	R		A	D	R	F		P	T	L	G	N	K	Q	C	A	G		215	53	54	21
	Clan74	CYP74	Glyma.14G078600.1		P	P	G	P		N	S	F	G	G	M		E	A	F	R		G	D	R	F		P	T	I	G	N	K	Q	C	A	G		215	53	54	22
	Clan74	CYP74	Glyma.17G246500.1		P	P	G	P		N	S	F	G	G	M		E	A	F	R		G	D	R	F		P	T	L	G	N	K	Q	C	A	G		215	53	54	22
	Clan74	CYP74	Glyma.12G191400.1		P	P	S	F		N	S	Y	G	G	F		E	T	L	R		P	D	R	F		P	S	V	S	N	K	Q	C	A	G		219	49	49	27
	Clan74	CYP74	Glyma.07G162900.1		P	P	G	P		N	A	Y	G	G	L		E	V	M	R		P	R	R	F		P	S	A	S	N	K	Q	C	P	G		219	52	54	21
	Clan74	CYP74	Glyma.11G122700.1		P	P	G	P		N	A	Q	G	G	L		E	V	L	R		A	H	R	F		P	T	P	D	D	K	Q	C	P	A		219	52	54	22
	Clan85	CYP707	Glyma.14G082900.1		P	P	G	S		A	A	Q	D	T	T		E	S	L	R		P	L	R	F		F	G	S	G	V	H	A	C	P	G		240	54	50	11
	Clan85	CYP707	Glyma.17G242200.1		P	P	G	S		A	A	Q	D	T	T		E	S	L	R		P	S	R	F		F	G	S	G	V	H	A	C	P	G		240	54	50	11
	Clan85	CYP707	Glyma.09G282900.1		P	P	G	S		A	A	H	D	T	T		E	T	L	R		P	S	R	F		F	G	N	G	V	H	S	C	P	G		242	55	50	11
	Clan85	CYP707	Glyma.01G153300.1		P	P	G	S		A	A	R	D	T	T		E	T	L	R		P	S	R	F		F	G	S	G	I	H	M	C	P	G		234	57	50	11
	Clan85	CYP707	Glyma.09G218600.1		P	P	G	S		A	A	R	D	T	T		E	T	L	R		P	S	R	F		F	G	S	G	I	H	M	C	P	G		234	57	50	11
	Clan85	CYP707	Glyma.16G076600.1		P	P	G	T		A	A	R	D	T	T		E	T	L	R		P	S	R	F		F	G	N	G	T	R	A	C	P	G		235	57	50	11
	Clan85	CYP707	Glyma.16G109300.1		P	P	G	T		A	A	R	D	T	T		E	T	L	R		P	S	R	F		F	G	N	G	T	H	A	C	P	G		233	57	50	11
	Clan85	CYP707	Glyma.17G133900.1		P	P	G	T		A	A	R	D	T	T		E	T	L	R		P	S	R	F		F	G	D	G	A	H	A	C	P	G		233	57	50	11
	Clan85	CYP707	Glyma.02G132200.1		P	P	G	S		A	A	Q	D	T	T		E	S	L	R		P	S	R	F		F	G	N	G	V	H	S	C	P	G		240	55	50	11
	Clan85	CYP707	Glyma.07G212700.1		P	P	G	S		A	A	Q	D	T	T		E	S	L	R		P	S	R	F		F	G	N	G	V	H	S	C	P	G		241	55	50	11
	Clan85	CYP716	Glyma.05G220500.1		P	P	G	A		G	G	H	D	T	A		E	V	M	R		P	T	R	F		F	G	G	G	P	R	M	C	P	G		249	54	50	12
	Clan85	CYP716	Glyma.08G026900.1		P	P	G	A		G	G	H	D	T	A		E	V	M	R		P	T	R	F		F	G	G	G	P	R	M	C	P	G		249	54	50	12
	Clan85	CYP716	Glyma.08G243600.1		P	P	G	K		G	S	H	E	T	T		E	V	I	R		P	S	R	F		F	G	G	G	P	S	M	C	P	G		249	55	50	12
	Clan85	CYP716	Glyma.05G166900.1		P	P	G	R		A	G	H	D	T	S		E	V	M	R		A	S	R	F		F	G	G	G	P	R	M	C	L	G		249	54	50	12
	Clan85	CYP716	Glyma.08G125000.1		P	P	G	R		A	G	H	D	S	S		E	V	M	R		A	S	R	F		F	G	G	G	P	R	M	C	L	G		249	54	50	12
	Clan85	CYP716	Glyma.08G125100.2		P	P	G	R		A	G	H	D	T	S		E	V	M	R		A	S	R	F		F	G	G	G	P	R	M	C	L	G		249	54	50	12
	Clan85	CYP718	Glyma.02G287300.1		P	P	G	E		A	A	H	D	T	T		E	S	M	R		P	S	R	F		F	G	G	G	P	R	V	C	A	G		246	54	50	11
	Clan85	CYP720	Glyma.09G160900.1		P	P	G	R		A	G	N	E	T	T		E	T	L	R		P	W	R	W		F	G	G	G	A	R	F	C	P	G		241	54	50	19
	Clan85	CYP720	Glyma.16G210300.1		P	P	G	R		A	G	N	E	T	T		E	T	L	R		P	W	R	W		F	G	G	G	A	R	F	C	P	G		241	53	50	19
	Clan85	CYP722	Glyma.04G030100.2		P	P	G	N		A	G	Q	D	T	I		E	A	L	R		P	S	R	F		F	G	M	G	G	R	T	C	L	G		249	54	50	11
	Clan85	CYP722	Glyma.04G030100.3		P	P	G	N		A	G	Q	D	T	I		E	A	L	R		P	S	R	F		F	G	M	G	G	R	T	C	L	G		249	54	50	11
	Clan85	CYP722	Glyma.04G030100.4		P	P	G	N		A	G	Q	D	T	I		E	A	L	R		P	S	R	F		F	G	M	G	G	R	T	C	L	G		249	54	50	11
	Clan85	CYP722	Glyma.16G133800.1		P	G	R	L		A	G	Q	T	T	T		E	T	L	R		P	Q	R	F		F	G	S	G	P	R	T	C	L	G		245	54	50	11
	Clan85	CYP724	Glyma.16G068100.1		P	P	G	S		G	G	Y	E	T	T		E	A	M	R		P	F	R	W		F	G	G	G	P	R	F	C	P	G		245	54	50	11
	Clan85	CYP724	Glyma.16G068100.2		P	P	G	S		G	G	Y	E	T	T		E	A	M	R		P	F	R	W		F	G	G	G	P	R	F	C	P	G		245	25	50	11
	Clan85	CYP728	Glyma.02G290000.1		P	P	G	S		A	G	H	D	T	S		E	T	I	R		P	S	R	F		F	G	G	G	A	R	I	C	P	G		250	54	50	13
	Clan85	CYP728	Glyma.18G052400.1		P	K	G	S		A	S	H	D	T	S		E	L	M	R		P	S	R	F		F	G	A	G	L	H	Y	C	I	G		249	55	50	14
	Clan85	CYP733	Glyma.02G083200.1		P	G	S	L		A	G	H	D	T	T		E	T	L	R		P	S	R	F		F	G	S	G	P	R	M	C	P	G		248	54	50	11
	Clan85	CYP733	Glyma.16G168900.1		P	G	S	L		A	G	H	D	T	T		E	T	L	R		P	S	R	F		F	G	S	G	P	R	M	C	P	G		238	48	50	11
	Clan85	CYP733	Glyma.16G168600.1		P	G	S	L		A	G	H	D	T	T		E	T	L	R		P	S	R	F		F	G	S	G	P	R	M	C	P	G		248	25	50	11
	Clan85	CYP85	Glyma.02G120700.1		P	P	G	S		S	G	Y	E	T	V		E	T	M	R		P	W	R	W		F	G	A	G	G	R	V	C	P	G		236	54	51	14
	Clan85	CYP85	Glyma.08G250000.1		P	Q	G	T		S	G	Y	E	T	V		E	T	S	R		P	W	R	W		F	G	G	G	T	R	Q	C	P	G		237	54	50	13
	Clan85	CYP85	Glyma.13G052900.3		P	P	G	T		S	G	Y	E	T	V		E	T	S	R		P	W	R	W		F	G	G	G	T	R	Q	C	P	G		237	54	50	13
	Clan85	CYP85	Glyma.18G272300.1		P	Q	G	T		S	G	Y	E	T	V		E	T	S	R		P	W	R	W		F	G	G	G	T	R	Q	C	P	G		237	54	50	13
	Clan85	CYP85	Glyma.19G033900.1		P	P	G	T		S	G	Y	E	T	V		E	T	S	R		P	W	R	W		F	G	G	G	T	R	Q	C	P	G		237	54	50	13
	Clan85	CYP87	Glyma.01G216900.1		P	P	G	S		A	S	F	E	T	T		E	T	V	R		P	W	R	W		F	G	G	G	M	R	F	C	V	G		244	55	50	14
	Clan85	CYP87	Glyma.11G026200.1		P	P	G	S		A	S	F	E	T	T		E	T	V	R		P	W	R	W		F	G	G	G	M	R	F	C	V	G		244	55	50	14
	Clan85	CYP88	Glyma.09G029400.1		P	P	G	D		A	G	H	E	S	S		E	T	L	R		P	N	R	W		F	G	G	G	S	R	L	C	P	G		249	55	50	11
	Clan85	CYP88	Glyma.15G135200.1		P	P	G	D		A	G	H	E	S	S		E	T	L	R		P	Y	R	W		F	G	G	G	S	R	L	C	P	G		250	55	50	11
	Clan85	CYP90	Glyma.02G256800.1		P	P	G	T		A	G	Y	E	T	T		E	T	L	R		P	W	R	W		F	G	G	G	P	R	L	C	P	G		241	55	50	15
	Clan85	CYP90	Glyma.11G228900.1		P	P	G	S		A	G	Y	E	T	T		E	T	L	R		P	W	R	W		F	G	G	G	P	R	L	C	P	G		242	54	50	16
	Clan85	CYP90	Glyma.14G059900.1		P	P	G	T		A	G	Y	E	T	T		E	T	L	R		P	W	R	W		F	G	G	G	P	R	L	C	P	G		241	55	50	15
	Clan85	CYP90	Glyma.14G059900.2		P	P	G	T		A	G	Y	E	T	T		E	T	L	R		P	W	R	W		F	G	G	G	P	R	L	C	P	G		241	55	50	15
	Clan85	CYP90	Glyma.18G028300.1		P	P	G	S		A	G	Y	E	T	T		E	T	L	R		P	W	R	W		F	G	G	G	P	R	L	C	P	G		242	54	50	16
	Clan85	CYP90	Glyma.01G175500.1		P	P	G	N		A	G	H	E	T	S		E	T	L	R		P	W	R	W		F	G	G	G	P	R	L	C	A	G		246	56	50	22
	Clan85	CYP90	Glyma.02G057500.1		P	P	G	Q		A	G	H	E	T	S		E	T	L	R		P	W	R	W		F	G	G	G	P	R	M	C	A	G		248	56	50	20
	Clan85	CYP90	Glyma.02G057500.2		P	P	G	Q		A	G	H	E	T	S		E	T	L	R		P	W	R	W		F	G	G	G	P	R	M	C	A	G		248	56	50	22
	Clan85	CYP90	Glyma.11G067700.1		P	P	G	N		A	G	H	E	T	S		E	T	L	R		P	W	R	W		F	G	G	G	P	R	L	C	A	G		246	56	50	21
	Clan85	CYP90	Glyma.02G051600.1		P	K	G	N		P	G	E	E	T	L		E	S	L	R		P	G	R	W		F	G	G	G	Q	R	L	C	P	G		254	54	50	14
	Clan85	CYP90	Glyma.11G073300.1		P	K	G	N		P	G	E	E	T	L		E	T	L	R		P	W	R	W		F	G	G	G	H	R	L	C	P	G		259	55	50	14
	Clan85	CYP90	Glyma.07G010700.1		P	L	G	T		P	G	E	D	S	V		E	T	L	R		P	W	R	W		F	G	G	G	Q	R	L	C	P	G		243	55	50	12
	Clan85	CYP90	Glyma.08G193900.1		P	L	G	T		P	G	E	D	S	V		E	T	L	R		P	W	R	W		F	G	G	G	Q	R	L	C	P	G		243	55	50	12
	Clan85	CYP90	Glyma.08G193900.2		P	L	G	T		P	G	E	D	S	V		E	T	L	R		P	W	R	W		F	G	G	G	Q	R	L	C	P	G		243	55	50	12
	Clan86	CYP704	Glyma.03G020400.1		P	D	Q	S		A	G	K	D	T	S		E	T	L	R		P	E	R	W		F	H	A	G	P	R	I	C	L	G		225	63	52	16
	Clan86	CYP704	Glyma.03G021600.1		P	D	Q	S		A	G	K	D	T	S		E	T	L	R		P	E	R	W		F	H	A	G	P	R	I	C	L	G		225	63	52	16
	Clan86	CYP704	Glyma.07G083200.1		P	F	R	Y		A	G	R	D	T	T		E	T	L	R		P	E	R	W		F	Q	A	G	P	R	I	C	L	G		222	60	52	17
	Clan86	CYP704	Glyma.07G083300.1		P	F	R	Y		A	G	K	D	T	T		E	T	L	R		P	E	R	W		F	Q	A	G	P	R	I	C	L	G		222	60	52	17
	Clan86	CYP704	Glyma.07G043300.1		P	F	T	T		A	G	R	D	T	T		E	T	L	R		P	E	R	W		F	Q	A	G	P	R	I	C	L	G		225	78	52	16
	Clan86	CYP86	Glyma.11G175900.1		P	K	V	W		A	G	R	D	T	S		E	T	L	R		P	E	R	F		F	N	A	G	P	R	T	C	L	G		268	61	52	19
	Clan86	CYP86	Glyma.14G192500.1		P	K	P	W		A	G	R	D	T	S		E	T	L	R		P	E	R	W		F	N	A	G	P	R	T	C	L	G		268	61	52	19
	Clan86	CYP86	Glyma.03G008100.2		P	R	V	W		A	G	R	D	T	S		E	T	L	R		P	E	R	W		F	N	A	G	P	R	I	C	L	G		270	62	52	18
	Clan86	CYP86	Glyma.05G208900.1		P	R	V	W		A	G	R	D	T	S		E	T	L	R		P	E	R	W		F	N	A	G	P	R	L	C	L	G		270	61	52	18
	Clan86	CYP86	Glyma.05G208981.1		P	R	V	W		A	G	R	D	T	S		E	T	L	R		P	E	R	W		F	N	A	G	P	R	L	C	L	G		270	61	52	18
	Clan86	CYP86	Glyma.07G069500.1		P	R	V	W		A	G	R	D	T	S		E	T	L	R		P	E	R	W		F	N	A	G	P	R	I	C	L	G		270	61	52	18
	Clan86	CYP86	Glyma.09G282700.1		P	I	L	G		A	G	R	D	T	S		E	A	L	R		P	E	R	W		F	N	G	G	P	R	L	C	L	G		263	65	52	17
	Clan86	CYP86	Glyma.11G100100.1		P	V	L	G		A	G	R	D	T	S		E	A	L	R		P	E	R	W		F	N	G	G	P	R	L	C	L	G		267	62	52	16
	Clan86	CYP86	Glyma.20G002700.1		P	I	F	G		A	G	R	D	T	S		E	A	L	R		P	E	R	W		F	N	G	G	P	R	L	C	L	G		263	64	52	17
	Clan86	CYP94	Glyma.03G160100.1		P	K	P	Y		A	G	K	D	T	T		E	S	M	R		P	E	R	W		F	Q	A	G	P	R	I	C	L	G		264	48	52	21
	Clan86	CYP94	Glyma.03G160200.1		P	K	P	Y		A	G	K	D	T	T		E	S	M	R		P	E	R	W		F	Q	A	G	P	R	I	C	L	G		263	48	52	21
	Clan86	CYP94	Glyma.03G160300.1		P	K	T	Y		A	G	K	D	T	T		E	S	M	R		P	E	R	W		F	Q	A	G	P	R	I	C	L	G		263	48	52	21
	Clan86	CYP94	Glyma.19G162100.1		P	K	P	Y		A	G	K	D	T	T		E	S	M	R		P	E	R	W		F	Q	A	G	P	R	I	C	L	G		263	48	52	21
	Clan86	CYP94	Glyma.13G120500.1		P	K	A	Y		A	G	R	D	T	T		E	S	M	R		P	E	R	W		F	Q	A	G	P	R	V	C	L	G		264	50	52	22
	Clan86	CYP94	Glyma.19G090800.1		P	A	T	Y		A	G	R	D	T	T		E	S	M	R		P	D	R	W		F	Q	A	G	P	R	V	C	L	G		263	45	52	23
	Clan86	CYP94	Glyma.01G112400.1		P	L	S	H		A	G	R	D	T	T		E	S	M	R		P	Q	R	W		F	Q	A	G	P	R	V	C	L	G		261	53	52	21
	Clan86	CYP94	Glyma.03G077600.1		P	L	S	H		A	G	R	D	T	T		E	S	M	R		P	E	R	W		F	Q	A	G	P	R	V	C	I	G		262	51	52	21
	Clan86	CYP94	Glyma.03G077800.1		P	L	S	H		A	G	R	D	T	T		E	S	M	R		P	E	R	W		F	Q	A	G	P	R	V	C	I	G		262	51	52	21
	Clan86	CYP94	Glyma.16G057100.1		P	A	T	Y		A	G	R	D	T	T		E	S	M	R		P	N	R	W		F	Q	A	G	P	R	V	C	L	G		264	45	52	22
	Clan86	CYP94	Glyma.03G193500.1		P	T	K	T		A	G	R	D	T	V		E	S	M	R		P	E	R	W		F	Q	A	G	I	R	V	C	L	G		228	54	52	16
	Clan86	CYP94	Glyma.11G185700.1		P	T	G	T		A	G	R	D	T	I		E	S	M	R		P	E	R	W		F	Q	A	G	V	R	V	C	L	G		230	52	52	16
	Clan86	CYP94	Glyma.12G087200.1		P	T	G	T		A	G	R	D	T	I		D	S	M	R		P	E	R	W		F	Q	A	G	V	R	V	C	L	G		228	52	52	16
	Clan86	CYP94	Glyma.13G152202.1		P	N	K	T		A	G	R	D	T	V		E	S	M	R		P	Q	R	W		F	Q	A	G	L	R	V	C	V	G		226	52	52	16
	Clan86	CYP94	Glyma.13G152202.2		P	N	K	T		A	G	R	D	T	V		E	S	M	R		P	Q	R	W		F	Q	A	G	L	R	V	C	V	G		226	52	52	16
	Clan86	CYP94	Glyma.03G122300.1		P	T	N	T		A	G	R	D	T	T		E	T	M	R		P	E	R	W		F	H	A	G	P	R	M	C	L	G		230	53	52	13
	Clan86	CYP96	Glyma.05G003000.1		P	I	L	G		A	G	R	D	T	I		E	A	L	R		P	E	R	W		F	N	A	G	P	R	T	C	L	G		263	55	52	17
	Clan86	CYP96	Glyma.05G003100.1		P	I	I	G		A	G	R	D	T	I		E	A	L	R		P	E	R	W		F	N	A	G	P	R	T	C	L	G		264	55	52	17
	Clan86	CYP96	Glyma.19G003600.1		P	I	L	G		A	G	R	E	T	M		E	A	L	R		P	E	R	W		F	N	A	G	P	R	I	C	L	G		266	53	52	17
	Clan86	CYP96	Glyma.19G057300.1		P	I	L	G		A	G	R	D	T	I		E	A	L	R		P	E	R	W		F	N	A	G	P	R	S	C	L	G		267	55	52	17
	Clan86	CYP96	Glyma.05G003200.1		P	I	L	G		A	G	R	D	T	I		E	A	L	R		P	E	R	W		F	N	A	G	P	R	T	C	L	G		264	55	52	17
	Clan86	CYP96	Glyma.19G003400.2		P	I	I	G		A	G	R	D	T	I		E	T	L	R		P	E	R	W		F	N	A	G	P	R	T	C	L	G		262	55	52	17
	Clan86	CYP96	Glyma.20G004700.1		P	I	I	G		A	G	S	G	T	V		E	A	L	R		P	E	R	W		F	N	A	G	P	R	S	C	L	G		275	55	52	17
	Clan97	CYP97	Glyma.09G252800.1		P	K	I	P		A	G	H	E	T	S		E	S	L	R		P	E	R	W		F	G	G	G	P	R	K	C	V	G		262	50	50	18
	Clan97	CYP97	Glyma.09G252800.2		P	K	I	P		A	G	H	E	T	S		E	S	L	R		P	E	R	W		F	G	G	G	P	R	K	C	V	G		262	50	50	18
	Clan97	CYP97	Glyma.18G239900.1		P	K	I	P		A	G	H	E	T	S		E	S	L	R		P	E	R	W		F	G	G	G	P	R	K	C	V	G		262	50	50	18
	Clan97	CYP97	Glyma.18G239900.2		P	S	F	I		A	G	H	E	T	S		E	S	L	R		P	E	R	W		F	G	G	G	P	R	K	C	V	G		214	50	50	18
	Clan97	CYP97	Glyma.18G239900.3		P	K	I	P		A	G	H	E	T	S		E	S	L	R		P	E	R	W		F	G	G	G	P	R	K	C	V	G		262	50	50	18
	Clan97	CYP97	Glyma.11G016200.1		P	K	R	I		A	G	H	E	T	T		E	A	L	R		P	E	R	F		F	G	G	G	P	R	K	C	V	G		312	50	58	37
	Clan97	CYP97	Glyma.11G016200.2		P	A	F	H		A	G	H	E	T	T		E	A	L	R		P	E	R	F		F	G	G	G	P	R	K	C	V	G		177	50	58	37
	Clan97	CYP97	Glyma.10G062900.1		P	K	P	Y		A	G	H	E	T	T		E	S	L	R		P	E	R	F		F	S	G	G	P	R	K	C	V	G		313	50	51	18
	Clan97	CYP97	Glyma.13G147500.1		P	K	P	Y		A	G	H	E	T	T		E	S	L	R		P	E	R	F		F	S	G	G	P	R	K	C	V	G		311	50	51	18
	Clan97	CYP97	Glyma.13G147500.2		P	K	P	Y		A	G	H	E	T	T		E	S	L	R		P	E	R	F		F	S	G	G	P	R	K	C	V	G		298	50	51	18
