# Supplementary material for: Comprehensive Analysis of Cytochrome P450 Monooxygenases Reveals Insight Into Their Role in Partial Resistance Against Phytophthora sojae in Soybean
Source: Front Plant Sci. 2022 Apr 14;13:862314. doi: 10.3389/fpls.2022.862314 (PMC9048032; doi:10.3389/fpls.2022.862314)
Supplement: Supplementary Table 6 — Distribution of GmP450 genes in soybean chromosomes. [file Table_6.xlsx]

## Sheet: GmP450s location on chromomsome
GmP450s physical position on chromsomes
Chromosome number	Gene ID	Position of correpondance gene on William82 a2.1		Position of gene on William82 a4.1		Count
		Start Pos (bp)		Start Pos (bp)	End Pos (bp)
1	Glyma.01G061100	8436335	8436335	8417731	8420094	14
	Glyma.01G078300	19990028	19990028	20123621	20126415
	Glyma.01G112400	38101986	38101986	38632764	38634501
	Glyma.01G135200	45702513	45702513	46807741	46812089
	Glyma.01G153300	49049375	49049375	50156099	50159143
	Glyma.01G169200	50665857	50665857	51774481	51777800
	Glyma.01G175500	51219681	51219681	52331795	52337034
	Glyma.01G179400	51531052	51531052	52643184	52645641
	Glyma.01G179500	51538311	51538311	52650360	52652683
	Glyma.01G179600	51542637	51542637	52654740	52657860
	Glyma.01G179700	51552707	51552707	52664787	52666912
	Glyma.01G181800	51750455	51750455	52862296	52864490
	Glyma.01G181900	51764570	51764570	52876304	52882201
	Glyma.01G216900	54720766	54720766	55819596	55822907
2	Glyma.02G051600	4676782	4676782	4658102	4665622	17
	Glyma.02G057500	5151731	5151731	5125137	5131415
	Glyma.02G078800	6802881	6802881	6773184	6775526
	Glyma.02G083200	7240751	7240751	7206648	7209938
	Glyma.02G119600	11775036	11775036	11492506	11494983
	Glyma.02G120700	11904074	11904074	11621519	11628282
	Glyma.02G132200	13704118	13704118	14139578	14143313
	Glyma.02G156000	16140655	16140655	16565845	16568428
	Glyma.02G156100	16311871	16311871	16737084	16739911
	Glyma.02G176200	28900535	28900535	30791278	30795542
	Glyma.02G235300	42283310	42283310	44112730	44115141
	Glyma.02G236500	42416141	42416141	44245635	44249943
	Glyma.02G256800	44339182	44339182	46167195	46173458
	Glyma.02G287300	46767524	46767524	48591797	48594091
	Glyma.02G290000	46966057	46966057	48790225	48792870
	Glyma.02G298600	47591385	47591385	49414410	49416331
	Glyma.02G298800	47601642	47601642	49424684	49427310
3	Glyma.03G008100	790311	790311	784329	787726	25
	Glyma.03G020400	2078755	2078755	2052767	2059691
	Glyma.03G021200	2170567	2170567	2144619	2147032
	Glyma.03G021600	2240686	2240686	2214783	2220514
	Glyma.03G029900	3326523	3326523	3290486	3292867
	Glyma.03G030400	3372331	3372331	3336092	3338383
	Glyma.03G030600	3427088	3427088	3390827	3392984
	Glyma.03G030800	3458451	3458451	3422191	3424330
	Glyma.03G030900	3462650	3462650	3426360	3429129
	Glyma.03G031000	3483334	3483334	3447181	3449920
	Glyma.03G031400	3522165	3522165	3484135	3490790
	Glyma.03G077600	19218518	19218518	20423690	20425480
	Glyma.03G077800	19287169	19287169	20492401	20493927
	Glyma.03G115300	32313509	32313509	33511230	33514213
	Glyma.03G122000	33466244	33466244	34667793	34672406
	Glyma.03G122300	33525303	33525303	34726750	34728924
	Glyma.03G142000	35794534	35794534	36979962	36982149
	Glyma.03G142100	35797319	35797319	36982726	36984888
	Glyma.03G143700	35944732	35944732	37129820	37131956
	Glyma.03G160100	37519192	37519192	38694932	38696965
	Glyma.03G160200	37527591	37527591	38703552	38705474
	Glyma.03G160300	37536013	37536013	38711991	38713760
	Glyma.03G189900	40073618	40073618	41241133	41244140
	Glyma.03G193500	40432693	40432693	41598441	41601974
	Glyma.03G226800	42889897	42889897	44061737	44065253
4	Glyma.04G030100	2440343	2442716	2427100	2431683	6
	Glyma.04G035000	2793125	2793125	2778592	2780674
	Glyma.04G035500	2820155	2820155	2805502	2807639
	Glyma.04G035600	2823374	2823374	2808607	2811434
	Glyma.04G052100	4228426	4228426	4222548	4229519
	Glyma.04G110400	12174525	12174525	11342092	11344263
5	Glyma.05G003000	212751	212751	213881	215748	17
	Glyma.05G003100	218330	218330	219483	221185
	Glyma.05G003200	227326	227326	228580	230453
	Glyma.05G010200	879578	879578	882500	885730
	Glyma.05G019200	1712988	1712988	1716339	1719082
	Glyma.05G021800	1911409	1911409	1914889	1918558
	Glyma.05G021900	1917507	1917507	1921012	1923394
	Glyma.05G022100	1929176	1929176	1932583	1936417
	Glyma.05G042600	3813746	3813746	3935205	3937596
	Glyma.05G042800	3839708	3839708	3961281	3966209
	Glyma.05G147100	34110351	34110351	34150611	34153212
	Glyma.05G166900	35735957	35735957	35770094	35773473
	Glyma.05G182800	37050919	37050919	37058834	37061069
	Glyma.05G208900	39081854	39081854	39089718	39092358
	Glyma.05G208981	39081854*	39084779*	39131157	39132722
	Glyma.05G220500	40008032	40008032	40057140	40060163
	Glyma.05G233200	41047522	41047522	41086392	41089262
6	Glyma.06G035200	2724860	2724860	2706183	2708638	12
	Glyma.06G035300	2729440	2729440	2710798	2714997
	Glyma.06G035400	2736074	2736074	2717420	2721009
	Glyma.06G052700	3981500	3981500	3959270	3969004
	Glyma.06G140000	11426310	11426310	11381705	11388811
	Glyma.06G176100	14890890	14890890	14844570	14847644
	Glyma.06G176200	14901016	14901016	14854628	14857291
	Glyma.06G202300	18731105	18731105	18547179	18554092
	Glyma.06G215200	22278471	22278471	22259984	22265824
	Glyma.06G227300	34434861	34440448	33823516	33838082
	Glyma.06G238500	38999067	38999067	38395983	38400094
	Glyma.06G310800	49935880	49935880	49475242	49481392
7	Glyma.07G010700	817488	817488	818549	823530	25
	Glyma.07G039800	3276016	3276016	3278455	3281813
	Glyma.07G043300	3592881	3592881	3585865	3588969
	Glyma.07G052300	4557779	4557779	4533246	4535388
	Glyma.07G069500	6304097	6304097	6153503	6156888
	Glyma.07G083000	7622834	7622834	7474931	7477477
	Glyma.07G083200	7657310	7657310	7509403	7521582
	Glyma.07G083300	7672012	7672012	7525432	7530211
	Glyma.07G089700	8393293	8393293	8246275	8249164
	Glyma.07G089800	8416943	8416943	8270101	8274345
	Glyma.07G089900	8423424	8423424	8276408	8279379
	Glyma.07G110900	11381266	11381266	11237184	11240305
	Glyma.07G118200	13381640	13381640	13235299	13241527
	Glyma.07G159800	20446104	20446104	20305776	20318414
	Glyma.07G160700	20763090	20763090	20628199	20635073
	Glyma.07G162900	21561988	21561988	21433312	21440043
	Glyma.07G194300	36288433	36288433	36631233	36636334
	Glyma.07G202300	37166660	37166660	37488903	37491290
	Glyma.07G212700	38438138	38438138	38761506	38766177
	Glyma.07G218200	39119344	39119344	39442197	39444734
	Glyma.07G220300	39486562	39490058	39811833	39813576
	Glyma.07G220400	39497397	39497397	39822655	39824911
	Glyma.07G220500	39515094	39515094	39840564	39842488
	Glyma.07G258800	43455253	43455253	43775631	43778805
	Glyma.07G267100	44054205	44054205	44374407	44376322
8	Glyma.08G026900	2134100	2134100	2132189	2136092	19
	Glyma.08G089400	6759742	6759742	6764477	6767073
	Glyma.08G089500	6765669	6765669	6770389	6772737
	Glyma.08G104100	7993317	7993317	7993308	7995716
	Glyma.08G109900	8431287	8431287	8431251	8436441
	Glyma.08G125000	9599620	9599620	9602316	9605570
	Glyma.08G125100	9605622	9605622	9608311	9611736
	Glyma.08G140400	10742008	10742008	10825854	10828685
	Glyma.08G140500	10748126	10748126	10831897	10834199
	Glyma.08G140600	10751884	10751884	10835711	10837975
	Glyma.08G193900	15620864	15620864	15702236	15707181
	Glyma.08G238100	20294013	20294013	20357982	20360391
	Glyma.08G243600	20903205	20903205	20967153	20973745
	Glyma.08G250000	21849856	21849856	21918870	21923580
	Glyma.08G326900	44512039	44512039	43894343	43897947
	Glyma.08G327100	44524192	44524192	43906455	43908628
	Glyma.08G327200	44531361	44531361	43913676	43916097
	Glyma.08G350800	46454043	46454043	45829106	45831216
	Glyma.08G365000	47602097	47602097	46977415	46981891
9	Glyma.09G029400	2404388	2404388	2401676	2408687	24
	Glyma.09G048700	4210666	4210666	4180465	4183894
	Glyma.09G048800	4214432	4214432	4184294	4186825
	Glyma.09G048900	4223719	4223719	4193594	4195649
	Glyma.09G049100	4264944	4264944	4234839	4236838
	Glyma.09G049200	4283716	4283716	4253575	4256263
	Glyma.09G049300	4289437	4289437	4259304	4261332
	Glyma.09G117400	27569358	27569358	28484050	28488584
	Glyma.09G137600	34094419	34094419	35011491	35015650
	Glyma.09G142200	35379653	35379653	36286544	36289040
	Glyma.09G142500	35436714	35436714	36343536	36346048
	Glyma.09G142900	35513123	35513123	36419932	36422540
	Glyma.09G160900	38497139	38497139	39396410	39400705
	Glyma.09G186000	41095580	41095580	41986836	41990484
	Glyma.09G186200	41106034	41106034	41997162	41999616
	Glyma.09G186300	41109320	41109320	42000688	42004327
	Glyma.09G186400	41114501	41114501	42005483	42008769
	Glyma.09G186500	41117996	41117996	42009551	42013633
	Glyma.09G218600	44167828	44167828	45035837	45038650
	Glyma.09G252800	47282157	47282157	47666003	47671752
	Glyma.09G260900	47908440	47908440	48297542	48299934
	Glyma.09G279100	49439843	49439843	49826566	49829026
	Glyma.09G282700	49842628	49842628	50223159	50227442
	Glyma.09G282900	49863377	49863377	50243863	50251777
10	Glyma.10G062900	5944827	5944827	5900098	5906736	13
	Glyma.10G092500	12875706	12875706	12722691	12726584
	Glyma.10G092600	12927851	12927851	12774710	12777021
	Glyma.10G114600	28616198	28616198	28346530	28350210
	Glyma.10G115300	28762975	28762975	28492632	28494841
	Glyma.10G115400	28782044	28782044	28514062	28516255
	Glyma.10G115500	28796396	28796396	28528481	28530637
	Glyma.10G200800	43176609	43176609	43262701	43266957
	Glyma.10G202400	43382723	43382723	43466023	43468012
	Glyma.10G203500	43476880	43476880	43557513	43559769
	Glyma.10G234600	46383827	46383827	46458048	46461763
	Glyma.10G234700	46404476	46404476	46475958	46478306
	Glyma.10G296400	51323582	51323582	51395301	51397516
11	Glyma.11G016200	1140099	1140099	1134730	1143751	21
	Glyma.11G026200	1847853	1847853	1843076	1846782
	Glyma.11G051800	3891456	3891456	3886032	3888141
	Glyma.11G060100	4535093	4535093	4528280	4530681
	Glyma.11G060200	4545030	4545030	4538256	4540922
	Glyma.11G062500	4729971	4729971	4723140	4726670
	Glyma.11G062600	4736775	4736775	4730070	4732519
	Glyma.11G067700	5084791	5084791	5077948	5082961
	Glyma.11G073300	5471609	5471609	5463553	5469818
	Glyma.11G074100	5535750	5535750	5527926	5531227
	Glyma.11G093100	7051962	7051962	7044067	7049981
	Glyma.11G100100	7589305	7589305	7582313	7585528
	Glyma.11G108300	8261601	8261601	8254609	8256749
	Glyma.11G122700	9354319	9354319	9330445	9332603
	Glyma.11G168428*	17264885*	17265566*	13831243	13850596
	Glyma.11G175900	20343531	20343531	25771589	25774314
	Glyma.11G185700	25444945	25444945	15982350	15984634
	Glyma.11G197300	27293982	27293982	32517666	32520168
	Glyma.11G197400	27385997	27385997	32609692	32612030
	Glyma.11G228900	32424578	32424578	37308090	37313815
	Glyma.11G250200	34197391	34197391	39073499	39075745
12	Glyma.12G013700	996838	996838	991738	993267	7
	Glyma.12G067000	4909073	4909073	4895181	4898018
	Glyma.12G067100	4919960	4919960	4906062	4909104
	Glyma.12G087200	7091681	7091681	7072134	7074170
	Glyma.12G160400	28459674	28459674	29021933	29024904
	Glyma.12G191400	35295823	35295823	36749466	36755278
	Glyma.12G239100	39801603	39801603	41241535	41245809
13	Glyma.13G046400	14071533	14071533	13133348	13138888	20
	Glyma.13G051600	14805645	14805645	13875896	13878416
	Glyma.13G052900	15036769	15036769	14105884	14110927
	Glyma.13G068500	16851649	16851649	15910044	15912796
	Glyma.13G068800	16864171	16864171	15920188	15925586
	Glyma.13G072100	17312472	17312472	16335975	16340735
	Glyma.13G120500	23317886	23317886	22345149	22346929
	Glyma.13G147500	26074694	26074694	25164186	25171270
	Glyma.13G152202*	26678025*	26684443*	25877030	25879577
	Glyma.13G173401*	28738547*	28739205*	28159853	28161962
	Glyma.13G173500	28761503	28761503	28182532	28184641
	Glyma.13G181900	29517237	29517237	28935417	28938242
	Glyma.13G217400	33038297	33038297	32445037	32446925
	Glyma.13G261700	36553556	36553556	35953418	35956565
	Glyma.13G262000	36579260	36579260	35979101	35985101
	Glyma.13G262100	36586108	36586108	35985939	35989763
	Glyma.13G265300	36822869	36822869	36222372	36225045
	Glyma.13G277100	37855223	37855223	37254966	37259969
	Glyma.13G285300	38620640	38620640	37999351	38002170
	Glyma.13G371400	45656479	45656479	45008346	45012819
14	Glyma.14G015100	1085839	1085839	1082782	1085641	7
	Glyma.14G059900	4839494	4839494	4753815	4761352
	Glyma.14G078600	6651847	6651847	6547282	6548905
	Glyma.14G082900	7198018	7198018	7087750	7092022
	Glyma.14G117200	14619883	14619883	14861839	14864654
	Glyma.14G192500	45715135	45715135	46587662	46590557
	Glyma.14G205200	47041931	47041931	47892074	47896155
15	Glyma.15G002200	220497	220497	220436	223011	9
	Glyma.15G050300	3968865	3968865	3953537	3955551
	Glyma.15G095000	7418342	7418342	7401006	7403474
	Glyma.15G135200	10854612	10854612	10790620	10797496
	Glyma.15G156100	13076997	13076997	13074247	13076579
	Glyma.15G203500	26003381	26003381	26744560	26747625
	Glyma.15G243300	46452068	46452068	48452275	48462524
	Glyma.15G244250*	46551134*	46557859*	48551478	48564714
	Glyma.15G245300	46683513	46683513	48681176	48689448
16	Glyma.16G008600	722534	722534	722474	725114	18
	Glyma.16G021200	1996084	1996084	1984573	1986865
	Glyma.16G057100	5588912	5588912	5575365	5577169
	Glyma.16G068100	6761573	6761573	6713946	6718356
	Glyma.16G076600	7775599	7775599	7715708	7719131
	Glyma.16G089700	12043399	12043399	12149875	12153910
	Glyma.16G089900	12247363	12247363	12354437	12357769
	Glyma.16G090000	12381052	12381052	12488101	12491830
	Glyma.16G109300	23419770	23419770	23617684	23620736
	Glyma.16G131200	28550384	28550384	28751175	28756521
	Glyma.16G133800	29058511	29058511	29254598	29259976
	Glyma.16G149300	30993255	30993255	31186383	31190129
	Glyma.16G168600	32850506	32850506	33024956	33027958
	Glyma.16G168900	32876131	32876131	33050581	33053525
	Glyma.16G182600	34364037	34364037	34578392	34582321
	Glyma.16G195500	35715897	35715897	35931839	35934562
	Glyma.16G195600	35719546	35719546	35935519	35938084
	Glyma.16G210300	36943869	36943869	37158855	37164876
17	Glyma.17G007200	619143	619143	618944	620970	16
	Glyma.17G015400	1151886	1151886	1150704	1153549
	Glyma.17G077700	6069510	6069510	6071379	6074362
	Glyma.17G080500	6245587	6245587	6247638	6249588
	Glyma.17G118100	9302935	9302935	9300084	9303670
	Glyma.17G125300	9978546	9978546	9972161	9976859
	Glyma.17G125400	9998285	9998285	9991893	9994297
	Glyma.17G133900	10783983	10783983	10768890	10773285
	Glyma.17G134100	10800448	10800448	10782895	10787386
	Glyma.17G134200	10806686	10806686	10789018	10793891
	Glyma.17G209100	34364400	34364400	34230665	34233832
	Glyma.17G227500	38211093	38211093	38139093	38145697
	Glyma.17G242200	39801530	39801530	39903845	39908224
	Glyma.17G246500	40223353	40223353	40325479	40328372
	Glyma.17G249400	40455113	40455113	40556957	40560624
	Glyma.17G255900	40989014	40989014	41091663	41093962
18	Glyma.18G028300	2124636	2124636	2123065	2128784	14
	Glyma.18G049500	4251051	4251051	4220964	4224355
	Glyma.18G052400	4526827	4526827	4493844	4497856
	Glyma.18G080200	7684214	7684214	7637416	7640119
	Glyma.18G080300	7699668	7699668	7652501	7655634
	Glyma.18G080400	7708911	7708911	7661768	7665393
	Glyma.18G100500	10620688	10620688	10545834	10548478
	Glyma.18G218500	50537102	50539350	50819956	50823720
	Glyma.18G218600	50541167	50541167	50825349	50829895
	Glyma.18G222900	50981819	50981819	51262793	51265190
	Glyma.18G223100	50990798	50990798	51271577	51274072
	Glyma.18G239900	52858638	52858638	53133184	53139735
	Glyma.18G272300	55524198	55524198	55798867	55803120
	Glyma.18G297200	57444434	57444434	57716825	57720956
19	Glyma.19G003400	241231	241231	245722	247540	17
	Glyma.19G003600	258921	258921	262861	265134
	Glyma.19G014600	1396438	1396438	1389749	1392194
	Glyma.19G014700	1401805	1401805	1394881	1398312
	Glyma.19G015000	1451328	1451328	1444749	1447499
	Glyma.19G015200	1463404	1463404	1456564	1459142
	Glyma.19G015300	1500237	1500237	1493068	1496103
	Glyma.19G033900	4363981	4363981	4353780	4357797
	Glyma.19G057300	10854237	10854237	10847714	10849782
	Glyma.19G090800	32292151	32292151	32786222	32788034
	Glyma.19G126000	38430097	38430097	38868377	38873952
	Glyma.19G144600	40571580	40571580	41016512	41021504
	Glyma.19G144700	40579736	40579736	41024728	41027051
	Glyma.19G146800	40755569	40755569	41200476	41202854
	Glyma.19G162100	42275657	42275657	42717760	42719625
	Glyma.19G240800	48875685	48875685	49399206	49401644
	Glyma.19G258700	50232126	50232126	50757932	50760076
20	Glyma.20G002700	250193	250193	249723	253586	16
	Glyma.20G004700	463333	463333	462691	464556
	Glyma.20G007000	669441	669441	668526	671032
	Glyma.20G007100	673959	673959	673233	676083
	Glyma.20G018600	1929353	1929353	1926078	1928084
	Glyma.20G018800	1944213	1944213	1940971	1942829
	Glyma.20G018900	1960201	1960201	1956846	1958859
	Glyma.20G041700	7344778	7344778	7337253	7345409
	Glyma.20G065000	22437570	22437570	22326214	22328551
	Glyma.20G065100	23009963	23009963	22898611	22901676
	Glyma.20G114200	35592130	35592130	35555564	35557874
	Glyma.20G147900	38637315	38637315	38613465	38615260
	Glyma.20G148000	38644780	38644780	38621019	38623204
	Glyma.20G159700	39814911	39814911	39786056	39789417
	Glyma.20G188000	42654896	42654896	42617036	42619153
	Glyma.20G189600	42822860	42822860	42784867	42788900
					Total	317
*The location of corresponding gene not found in Williams82 V2.1 so a putative location of gene was collected from similar gene id in annotaion v2.1
