# Supplementary material for: Comprehensive Analysis of Cytochrome P450 Monooxygenases Reveals Insight Into Their Role in Partial Resistance Against Phytophthora sojae in Soybean
Source: Front Plant Sci. 2022 Apr 14;13:862314. doi: 10.3389/fpls.2022.862314 (PMC9048032; doi:10.3389/fpls.2022.862314)
Supplement: Supplementary Table 7 — A list of quantitative trait loci (QTL) identified in soybean–P. sojae interactions and GmP450s within the QTL. [file Table_7.xlsx]

## Sheet: QTLs
List of Biparental QTLs used in this study along with their LOD score and Phenotypic variance
QTL name	Chromosome number	LOD Score	R2 (Phenotypic variation)	Start Position*	End Position*	Reference
Phytoph 1-2	2	2.5	15.9	14288241	19688108	Burnham et al. 2003
Phytoph 2-2	2	3	10.6	19688108	29355267	Burnham et al. 2003
Phytoph 3-2	2	3	15.9	14288241	19688108	Burnham et al. 2003
Phytoph 4-2	2	3	20.7	19688108	29355267	Burnham et al. 2003
Phytoph 1-1	13	2.93	35	16454986	16600399	Burnham et al. 2003
Phytoph 2-1	13	3.25	32.4	16454986	16855019	Burnham et al. 2003
Phytoph 4-1	13	3.5	21.4	16454986	16855019	Burnham et al. 2003
Phytoph 10-3	2	29.77	16.71	-	45267040	Han et al. 2008
Phytoph 10-1	13	28.99	5.9	6216988	13134055	Han et al. 2008
Phytoph 10-2	13	28.67	8.2	10392903	-	Han et al. 2008
Phytoph 14-4	2	2.2	2.3	653561	4961586	Lee et al. 2013a
Phytoph 14-5	3	2.6	2.8	3021266	28610761	Lee et al. 2013a
Phytoph 14-6	4	2.6	2.5	96434	3979929	Lee et al. 2013a
Phytoph 14-7	4	1.7	1.9	41766353	46831893	Lee et al. 2013a
Phytoph 14-8	7	2.2	2.4	5937694	15018628	Lee et al. 2013a
Phytoph 14-2	13	14.8	16.1	27656895	30236183	Lee et al. 2013a
Phytoph 14-9	15	2.3	2.6	1540857	5541487	Lee et al. 2013a
Phytoph 14-3	18	3.4	3.6	53527352	56207762	Lee et al. 2013a
Phytoph 14-10	20	2	1.9	27645010	35186610	Lee et al. 2013a
Phytoph 6-2	2	4.57	21.98	27699285	29355267	Li et al, 2010
Phytoph 6-3	2	3.21	27.98	19688108	34875449	Li et al, 2010
Phytoph 6-6	6	7.17	7.56	23848501	31490622	Li et al, 2010
Phytoph 6-7	6	33.94	13.72	17218677	20218893	Li et al, 2010
Phytoph 6-8	6	2.76	4.24	44049891	46820673	Li et al, 2010
Phytoph 6-4	8	9.86	14.1	17542611	20272858	Li et al, 2010
Phytoph 6-5	11	2.82	14.8	33581636	34173104	Li et al, 2010
Phytoph 6-1	13	5.28	9.23	8587948	10392903	Li et al, 2010
Phytoph 12-1	13	15.9	35.8	28506083	35072147	Nguyen et al, 2012
Phytoph 12-2	17	3.3	8.8	20378955	20023244	Nguyen et al, 2012
Phytoph 8-4	13	3.9	7	28912864	31802559	Tucker et al, 2010
Phytoph 8-1	16	27.6	32	8909747	23417256	Tucker et al, 2010
Phytoph 8-3	18	3	10	2399809	4713017	Tucker et al, 2010
Phytoph 8-2	20	3.8	10	25275083	35362576	Tucker et al, 2010
Phytoph 9-1	12	2	4.9	3586396	5964913	Wang et al, 2010
Phytoph 9-2	13	2.5	6	16855019	17875691	Wang et al, 2010
Phytoph 9-3	13	2.8	8	31794058	31802559	Wang et al, 2010
Phytoph 9-4	14	2.5	6.9	9434565	16352945	Wang et al, 2010
Phytoph 9-5	17	3.7	7.3	18425834	36718722	Wang et al, 2010
Phytoph 9-6	19	2.5	5.8	42119600	43036918	Wang et al, 2010
Phytoph 11-1	8	2.1	6.4	7690356	8223774	Wang et al, 2012a
Phytoph 11-17	12	1.9	6.7	5526315	5526715	Wang et al, 2012a
Phytoph 11-19	13	2.5	3.2	20413719	23683604	Wang et al, 2012a
Phytoph 11-21	13	2.9	7.1	31794058	32196800	Wang et al, 2012a
Phytoph 11-22	14	2.9	6.7	9758992	31284724	Wang et al, 2012a
Phytoph 11-20	17	3.1	7.3	18425834	27359151	Wang et al, 2012a
Phytoph 11-3	18	4.4	16.5	53852771	53853171	Wang et al, 2012a
Phytoph 11-4	18	3.2	8.9	55001377	55001777	Wang et al, 2012a
Phytoph 11-5	18	2.4	6.4	54743947	54744347	Wang et al, 2012a
Phytoph 11-6	18	5.7	16.2	56889749	56889960	Wang et al, 2012a
Phytoph 11-10	19	2.6	7.6	46388280	46388680	Wang et al, 2012a
Phytoph 11-11	19	2.5	8	47232749	47233149	Wang et al, 2012a
Phytoph 11-12	19	4.6	13.7	48732711	48733111	Wang et al, 2012a
Phytoph 11-13	19	5.6	15.1	47923347	47923747	Wang et al, 2012a
Phytoph 11-14	19	7.9	11.9	47227073	48732911	Wang et al, 2012a
Phytoph 11-16	19	4.1	9.2	48337871	48338271	Wang et al, 2012a
Phytoph 11-7	19	4.6	14.5	43231021	43231421	Wang et al, 2012a
Phytoph 11-8	19	4.3	13	44019232	44019632	Wang et al, 2012a
Phytoph 11-9	19	2	5	43533489	43533889	Wang et al, 2012a
Phytoph 13-3	1	3.7	5	49814459	50198225	Wang et al, 2012b
Phytoph 13-4	18	4.5	6.1	53852971	53902949	Wang et al, 2012b
Phytoph 13-5	18	8.4	9.3	54744147	57972957	Wang et al, 2012b
Phytoph 13-1	19	3.5	4.8	43023054	43533689	Wang et al, 2012b
Phytoph 13-2	19	7.9	11.9	47227073	48732943	Wang et al, 2012b
Phytoph 15-3	1	3.7	5	49814688	51043150	Wang et al, 2012b
Phytoph 15-4	18	4.5	6.1	53823764	55007329	Wang et al, 2012b
Phytoph 15-5	18	8.4	9.3	53866536	57968533	Wang et al, 2012b
Phytoph 15-1	19	3.5	4.8	43023466	43727029	Wang et al, 2012b
Phytoph 15-2	19	7.9	11.9	47232960	48220848	Wang et al, 2012b
Phytoph 7-1	16	2.16	14.8	8909747	14155157	Weng, 2007 #145
Phytoph 5-1	6	2.18	4.3	7195938	20218893	Wu et al, 2011
Phytoph 5-3	10	2.46	7.7	10091607	43788256	Wu et al, 2011
Phytoph 5-2	15	5.19	15.9	6823519	13653981	Wu et al, 2011
QTL2-6	2	2.32	10.7-11.4	4601652	5513661	Abeysekara et al. 2016
QTL2-14	2	4.32	12.1-14.6	47449589	48163979	Abeysekara et al. 2016
QTL2-16	2	1.5	5.6	48163979	48470807	Abeysekara et al. 2016
QTL3-26	3	1.93	6.7-6.9	35023101	36005219	Abeysekara et al. 2016
QTL5-35	5	1.93	7.86	33948821	34565334	Abeysekara et al. 2016
QTL6-40	6	1.75	4.7-5.5	21986451	46595743	Abeysekara et al. 2016
QTL7-41	7	1.57	11.6-12.4	2491792	6443462	Abeysekara et al. 2016
QTL8-44	8	1.89	14.5-15.9	9483567	21390401	Abeysekara et al. 2016
QTL9-47	9	2.02	7.1	1295582	2344984	Abeysekara et al. 2016
QTL9-48	9	8.46	29.9	39718390	40901060	Abeysekara et al. 2016
QTL9-49	9	5.42	21	40901060	41060168	Abeysekara et al. 2016
QTL12-54	12	1.5	5.7	7533331	9804254	Abeysekara et al. 2016
QTL13-70	13	1.79	5.7	39743939	42131426	Abeysekara et al. 2016
QTL14-71	14	1.82	5.9	7240626	8132273	Abeysekara et al. 2016
QTL15-73	15	1.6	4.6	2740735	2893611	Abeysekara et al. 2016
QTL15-76	15	1.6	6.7-7.3	4433944	5541487	Abeysekara et al. 2016
QTL17-85	17	2.21	7.6-12.7	7487007	8088937	Abeysekara et al. 2016
QTL19-99	19	1.89	8.5-8.9	47232548	48732943	Abeysekara et al. 2016
QTL20-111	20	2.09	6.8-7.4	343019	1738862	Abeysekara et al. 2016
qHMPRR-3	2	4.04	2.94	19688108	36833446	Han et al. 2017
qHDPRR-4	6	3.46	10.41	28805012	44049891	Han et al. 2017
qHDPRR-5	6	2.53	1.27	11336632	38049354	Han et al. 2017
qHMPRR-5	7	6.67	1.68	12355353	40919537	Han et al. 2017
qHDPRR-1	8	4.06	2.02	16361908	48185138	Han et al. 2017
qHDPRR-2	8	3.55	5.35	4006423	5334061	Han et al. 2017
qHMPRR-1	8	3.52	9.87	17232172	40104380	Han et al. 2017
qHMPRR-6	10	3.89	4.05	12355353	25055408	Han et al. 2017
qHDPRR-3	13	2.98	7.89	29609521	34077986	Han et al. 2017
qHMPRR-4	13	2.98	5.35	29609521	32721481	Han et al. 2017
qHMPRR-2	18	3.46	12.65	3172879	48185138	Han et al. 2017
qHMPRR-7	19	4.12	8.02	43036918	47167396	Han et al. 2017
Phytoph 14-1	1	4.4	4.6	50560774	52285949	Lee et al. 2013a
QTL18-93	18	3.4	3.6	53527352	56207762	Lee et al. 2013a
QTL3-18	3	2.4	3.6	3021266	5656713	Lee et al. 2013b
QTL3-27	3	2.8	4.6	38834669	43411678	Lee et al. 2013b
QTL4-30	4	1.6	2.4	96434	2126907	Lee et al. 2013b
QTL4-31	4	1.6	2.5	8133935	41766604	Lee et al. 2013b
QTL8-45	8	3.6	7.2	24773356	44892971	Lee et al. 2013b
QTL10-51	10	2.8	4.6	39916257	45331446	Lee et al. 2013b
QTL13-64	13	5	8.6	27656895	30236183	Lee et al. 2013b
QTL15-74	15	4.4	7.2	2740735	3581354	Lee et al. 2013b
QTL18-92	18	2	3.5	50537043	53527352	Lee et al. 2013b
QTL1-4	1		5.6	50560774	51042922	Lee et al. 2014
QTL3-28	3	7.6	3.9	39134120	41065116	Lee et al. 2014
QTL12-55	12	8.1	4	14656455	33110525	Lee et al. 2014
QTL13-67	13	19.9	10.6	29647017	29685828	Lee et al. 2014
QTL16-84	16	7.2	3.9	36732604	37046875	Lee et al. 2014
QTL18-88	18	39.3	19.4	2306213	2843515	Lee et al. 2014
C2-02-1	2	5.49	2.78	43367206	43440684	Rolling et al. 2020
OH-02-1	2	5.58	2.69	38935468	39002760	Rolling et al. 2020
OH-02-2	2	5.95	6.36	39090899	39126047	Rolling et al. 2020
C2-03-1	3	7.02	6.88	786873	821859	Rolling et al. 2020
C2-03-2	3	5.48	7.03	821859	875151	Rolling et al. 2020
C2-03-3	3	7.43	4.04	3691222	3895958	Rolling et al. 2020
OH-03-1	3	8.36	4.76	6074620	6378977	Rolling et al. 2020
OH-03-2	3	6.63	8.47	7872384	8252615	Rolling et al. 2020
OH-03-3	3	10.04	8.58	42506684	42517511	Rolling et al. 2020
C2-04-1	4	9.03	5.52	6514173	6682383	Rolling et al. 2020
C2-05-1	5	17.32	5.71	41780982	42090709	Rolling et al. 2020
OH-05-1	5	7.08	7.43	36972839	37035513	Rolling et al. 2020
OH-06-1	6	5.48	7.79	50603738	50852296	Rolling et al. 2020
C2-08-1	8	6.1	2.79	5472166	5709053	Rolling et al. 2020
C2-08-2	8	11.02	1.17	9877098	9898176	Rolling et al. 2020
C2-08-3	8	6.78	3.16	20295654	20975559	Rolling et al. 2020
OH-10-1	10	5.32	4.19	998272	1022198	Rolling et al. 2020
OH-10-2	10	6.13	4.45	33174697	33499135	Rolling et al. 2020
C2-11-1	11	5.97	3.11	26075475	26169302	Rolling et al. 2020
OH-11-1	11	6.61	8.88	4563815	4586936	Rolling et al. 2020
OH-11-2	11	5.47	12.1	5898743	5962759	Rolling et al. 2020
OH-12-1	12	5.94	10.73	1804514	1844191	Rolling et al. 2020
C2-13-1	13	6.5	9.19	13389672	13550863	Rolling et al. 2020
C2-13-2	13	6.04	0.21	15952204	16017061	Rolling et al. 2020
C2-13-3	13	5.96	10.37	18315025	18531998	Rolling et al. 2020
C2-13-4	13	5.44	5.03	19599094	19614217	Rolling et al. 2020
C2-13-5g	13	5.51	2.07	28001686	28051574	Rolling et al. 2020
C2-13-6h	13	6.21	3.45	30502735	30618405	Rolling et al. 2020
C2-13-7'	13	6.82	11.2	30646059	30654291	Rolling et al. 2020
OH-13-1g	13	5.62	6.75	27874365	27896769	Rolling et al. 2020
OH-13-2h	13	8.06	2.61	29971253	30065880	Rolling et al. 2020
OH-13-3h	13	5.87	8.02	30086805	30144416	Rolling et al. 2020
OH-13-4h,	13	5.98	2.57	30291675	30301385	Rolling et al. 2020
OH-13-5h'	13	5.75	3.06	30667266	30700217	Rolling et al. 2020
C2-14-1	14	7.84	4.72	2131853	2153133	Rolling et al. 2020
C2-15-1	15	5.72	1.01	2952387	3182673	Rolling et al. 2020
C2-16-1	16	17.2	7.52	27437538	27660360	Rolling et al. 2020
C2-17-1	17	7.32	4.54	33515060	33574931	Rolling et al. 2020
C2-17-2	17	7.18	2.38	36398362	36411792	Rolling et al. 2020
C2-18-1	18	5.51	2.21	347317	441123	Rolling et al. 2020
OH-18-1	18	4.83	7.19	2128180	2155661	Rolling et al. 2020
OH-18-2	18	5.91	2.93	54737619	54774006	Rolling et al. 2020
OH-20-1	20	5.41	8.89	1724545	1897580	Rolling et al. 2020
OH-20-2	20	5.55	7.72	45279755	45458003	Rolling et al. 2020
qqQTL-13	13	3	13.1	50040258	50556102	Ronne et al.2019
qqQTL-19	19	3	17.6	28842184	30776191	Ronne et al.2019
PhS6-1	6	5.5	17	11725151	11728261	Scott et al., 2019
Phs13-1	13	17.58	42.2	30125163	30154255	Scott et al., 2019
PhS13-2	13	4.7	7.2	40233656	42919730	Scott et al., 2019
PhS18-1	18	7.54	24.6	1685460	2103034	Scott et al., 2019
QTL1-1	1	3.2	4.5	50164447	50295635	Stasko et al. 2016
QTL1-2	1	3.2	8.2	50206347	50287274	Stasko et al. 2016
QTL1-5	1	3.2	7.6	50572171	50797061	Stasko et al. 2016
QTL4-33	4	3.2	3.2	45977762	46204517	Stasko et al. 2016
QTL4-34	4	3.2	3.2	46096228	46536196	Stasko et al. 2016
QTL9-46	9	3.2	4.5-7.4	15487393	-	Stasko et al. 2016
QTL15-75	15	3.2	2	3591774	3639988	Stasko et al. 2016
QTL16-80	16	3.2	5.1	486741	807114	Stasko et al. 2016
QTL16-81	16	3.2	3.5-5.4	3124736	3362395	Stasko et al. 2016
QTL18-90	18	3.2	13.6	56710850	56876857	Stasko et al. 2016
QTL18-91	18	3.2	5.3	56710850	56766936	Stasko et al. 2016
QTL19-94	19	3.2	4.6	43023054	46116996	Stasko et al. 2016
QTL19-96	19	3.2	3.1	43533689	44370710	Stasko et al. 2016
QTL19-97	19	3.2	9.1	44370710	46116996	Stasko et al. 2016
QTL19-98	19	3.2	4.1-7.8	47528116	47787869	Stasko et al. 2016
QTL19-102	19	3.2	6.6	50305134	50342889	Stasko et al. 2016
Qprr3-1	3	2.6872	5.87	41803925	41822143	Zhao et al, 2020
Qprr3-2	3	18.2596	56.07	3904775	4404630	Zhao et al, 2020
* Position of QTL on William 82 V2.1 genome in basepair

## Sheet: GmP50 in QTLs
GmP450s undelying QTL regions
GmP450 Family	GmP450s*	QTLs
CYP51	Glyma.07G110900	Phytoph 14-8
CYP703	Glyma.12G160400	QTL12-55
CYP704	Glyma.07G043300	QTL7-41
CYP704	Glyma.07G083200	Phytoph 14-8
CYP704	Glyma.07G083300	Phytoph 14-8
CYP706	Glyma.07G218200	qHMPRR-5
CYP707	Glyma.07G212700	qHMPRR-5
CYP71	Glyma.01G179400	Phytoph 14-1
CYP71	Glyma.01G179500	Phytoph 14-1
CYP71	Glyma.01G179600	Phytoph 14-1
CYP71	Glyma.01G179700	Phytoph 14-1
CYP71	Glyma.02G156000	Phytoph 1-2	Phytoph 3-2
CYP71	Glyma.02G156100	Phytoph 1-2	Phytoph 3-2
CYP71	Glyma.02G298600	QTL2-14
CYP71	Glyma.02G298800	QTL2-14
CYP71	Glyma.04G110400	QTL4-31
CYP71	Glyma.06G176100	Phytoph 5-1	qHDPRR-5
CYP71	Glyma.06G176200	Phytoph 5-1	qHDPRR-5
CYP71	Glyma.07G159800	qHMPRR-5
CYP71	Glyma.07G160700	qHMPRR-5
CYP71	Glyma.07G194300	qHMPRR-5
CYP71	Glyma.08G326900	QTL8-45	qHDPRR-1
CYP71	Glyma.08G327100	QTL8-45	qHDPRR-1
CYP71	Glyma.08G327200	QTL8-45	qHDPRR-1
CYP71	Glyma.10G114600	Phytoph 5-3
CYP71	Glyma.10G115300	Phytoph 5-3
CYP71	Glyma.10G115400	Phytoph 5-3
CYP71	Glyma.10G115500	Phytoph 5-3
CYP71	Glyma.13G181900	Phytoph 8-4	Phytoph 14-2	qqQTL-13	Phytoph 12-1	QTL13-64
CYP71	Glyma.14G117200	Phytoph 11-22	Phytoph 9-4
CYP71	Glyma.15G050300	Phytoph 14-9
CYP71	Glyma.17G209100	Phytoph 9-5
CYP71	Glyma.18G080200	qHMPRR-2
CYP71	Glyma.18G080300	qHMPRR-2
CYP71	Glyma.18G080400	qHMPRR-2
CYP71	Glyma.20G007000	QTL20-111
CYP71	Glyma.20G007100	QTL20-111
CYP710	Glyma.13G217400	qHDPRR-3	Phytoph 12-1
CYP710	Glyma.15G095000	Phytoph 5-2
CYP714	Glyma.18G218500	QTL18-92
CYP714	Glyma.06G140000	Phytoph 5-1	qHDPRR-5
CYP714	Glyma.07G118200	qHMPRR-5	Phytoph 14-8
CYP714	Glyma.18G049500	Phytoph 8-3	qHMPRR-2
CYP714	Glyma.18G218600	QTL18-92
CYP716	Glyma.08G125000	QTL8-44
CYP716	Glyma.08G125100	QTL8-44
CYP716	Glyma.08G243600	C2-08-3	qHDPRR-1	QTL8-44	qHMPRR-1
CYP72	Glyma.06G227300	QTL6-40	qHDPRR-4	qHDPRR-5
CYP72	Glyma.03G226800	QTL3-27
CYP72	Glyma.06G238500	qHDPRR-4	QTL6-40
CYP72	Glyma.08G238100	qHDPRR-1	qHMPRR-1	QTL8-44
CYP720	Glyma.16G210300	QTL16-84
CYP728	Glyma.18G052400	Phytoph 8-3	qHMPRR-2
CYP734	Glyma.06G215200	QTL6-40	qHDPRR-5
CYP735	Glyma.08G365000	qHDPRR-1
CYP735	Glyma.18G297200	Phytoph 13-5	Phytoph 15-5
CYP736	Glyma.07G089700	Phytoph 14-8
CYP736	Glyma.07G089800	Phytoph 14-8
CYP736	Glyma.07G089900	Phytoph 14-8
CYP736	Glyma.08G140400	QTL8-44
CYP736	Glyma.08G140500	QTL8-44
CYP736	Glyma.08G140600	QTL8-44
CYP74	Glyma.04G035000	Phytoph 14-6
CYP74	Glyma.07G162900	qHMPRR-5
CYP75	Glyma.06G202300	Phytoph 6-7	Phytoph 5-1	qHDPRR-5
CYP75	Glyma.13G072100	Phytoph 9-2
CYP76	Glyma.03G189900	QTL3-27	QTL3-28
CYP76	Glyma.07G083000	Phytoph 14-8
CYP76	Glyma.10G200800	QTL10-51	Phytoph 5-3
CYP76	Glyma.10G203500	QTL10-51	Phytoph 5-3
CYP76	Glyma.18G222900	QTL18-92
CYP76	Glyma.18G223100	QTL18-92
CYP77	Glyma.10G202400	QTL10-51	Phytoph 5-3
CYP78	Glyma.05G147100	QTL5-35
CYP78	Glyma.07G052300	QTL7-41
CYP78	Glyma.08G104100	Phytoph 11-1
CYP78	Glyma.19G258700	qqQTL-19
CYP81	Glyma.15G156100	Phytoph 5-2
CYP82	Glyma.01G181800	Phytoph 14-1
CYP82	Glyma.01G181900	Phytoph 14-1
CYP82	Glyma.04G035500	Phytoph 14-6
CYP82	Glyma.04G035600	Phytoph 14-6
CYP82	Glyma.13G068500	Phytoph 2-1	Phytoph 4-1
CYP82	Glyma.13G068800	Phytoph 9-2
CYP82	Glyma.16G089700	Phytoph 7-1	Phytoph 8-1
CYP82	Glyma.16G089900	Phytoph 7-1	Phytoph 8-1
CYP82	Glyma.16G090000	Phytoph 7-1	Phytoph 8-1
CYP83	Glyma.03G029900	Phytoph 14-5	QTL3-18
CYP83	Glyma.03G030400	Phytoph 14-5	QTL3-18
CYP83	Glyma.03G030600	Phytoph 14-5	QTL3-18
CYP83	Glyma.03G030800	Phytoph 14-5	QTL3-18
CYP83	Glyma.03G030900	Phytoph 14-5	QTL3-18
CYP83	Glyma.03G031000	Phytoph 14-5	QTL3-18
CYP83	Glyma.03G031400	Phytoph 14-5	QTL3-18
CYP83	Glyma.18G100500	qHMPRR-2
CYP84	Glyma.01G169200	Phytoph 14-1	Phytoph 15-3	QTL1-4	QTL1-5
CYP722	Glyma.04G030100	Phytoph 14-6
CYP85	Glyma.08G250000	qHMPRR-1
CYP85	Glyma.18G272300	Phytoph 13-5	Phytoph 14-3	Phytoph 15-5
CYP86	Glyma.03G008100	C2-03-1
CYP86	Glyma.07G069500	Phytoph 14-8	QTL7-41
CYP88	Glyma.15G135200	Phytoph 5-2
CYP89	Glyma.07G220300	qHMPRR-5
CYP89	Glyma.07G220400	qHMPRR-5
CYP89	Glyma.07G220500	qHMPRR-5
CYP90	Glyma.01G175500	Phytoph 14-1
CYP90	Glyma.02G051600	Phytoph 14-4	QTL2-6
CYP90	Glyma.02G057500	QTL2-6
CYP90	Glyma.08G193900	QTL8-44
CYP92	Glyma.07G039800	QTL7-41
CYP92	Glyma.16G008600	QTL16-80
CYP93	Glyma.13G173401	Phytoph 12-1	Phytoph 14-2	QTL13-64
CYP93	Glyma.02G176200	Phytoph 2-2	Phytoph 4-2	Phytoph 6-2	Phytoph 6-3	qHMPRR-3
CYP93	Glyma.03G142000	QTL3-26
CYP93	Glyma.03G142100	QTL3-26
CYP93	Glyma.03G143700	QTL3-26
CYP93	Glyma.07G202300	qHMPRR-5
CYP93	Glyma.08G350800	qHDPRR-1
CYP93	Glyma.10G092500	Phytoph 5-3	qHMPRR-6
CYP93	Glyma.10G092600	Phytoph 5-3	qHMPRR-6
CYP93	Glyma.12G067000	Phytoph 9-1
CYP93	Glyma.12G067100	Phytoph 9-1
CYP93	Glyma.13G173500	Phytoph 12-1	Phytoph 14-2	QTL13-64
CYP94	Glyma.03G077600	Phytoph 14-5
CYP94	Glyma.03G077800	Phytoph 14-5
CYP94	Glyma.03G193500	QTL3-27	QTL3-28
CYP94	Glyma.13G120500	Phytoph 11-19
CYP94	Glyma.19G162100	Phytoph 9-6
CYP96	Glyma.20G004700	QTL20-111
CYP97	Glyma.18G239900	QTL18-92
* GmP450s in underlying region of QTL on William 82 V2.1 genome
