# Supplementary material for: Comprehensive Analysis of Cytochrome P450 Monooxygenases Reveals Insight Into Their Role in Partial Resistance Against Phytophthora sojae in Soybean
Source: Front Plant Sci. 2022 Apr 14;13:862314. doi: 10.3389/fpls.2022.862314 (PMC9048032; doi:10.3389/fpls.2022.862314)
Supplement: Supplementary Table 8 — Co-expression analysis of differentially expressed GmP450 genes upon P. sojae infection. [file Table_8.xlsx]

## Sheet: Common DEGs
Differentially expressed genes in at least 4 bioprojects used for the coexpression network analysis
Common genes among bioprojects	Gene ID	GmP450 Family	Predicted Function	QTL underlying Gene (Y/N)	Genes in Coexpression network involving IFS2 (Figure 6.2)	Characterized or not	Function	QTL Count
PRJNA210431, PRJNA318321, PRJNA544432, PRJNA478334, PRJNA324419, PRJNA574764-common.21
	Glyma.13G173500	CYP93	Flavonoid Metabolism	Y		Characterized	2-hydroxyisoflavanone synthase	6
	Glyma.13G173401	CYP93	Flavonoid Metabolism
	Glyma.13G068800	CYP82	Jasmonic Acid and Ethylene Signaling Pathway	Y		Characterized	Jasmonic Acid and Ethylene Signaling
	Glyma.16G008600	CYP92	Reported in plant defence response (terpenoid defense)	Y
	Glyma.13G265300	CYP76	Metabolism of both natural and xenobiotic compounds/Sesquiterpene Biosynthesis santalols and bergamotol
	Glyma.20G114200	CYP73	Phenylpropanoid Pathway (C4H)
	Glyma.09G048900	CYP81	Phenylpropanoid Pathway
	Glyma.01G061100	CYP78	Reported for organ growth
	Glyma.05G147100	CYP78	Reported for organ growth	Y
	Glyma.17G227500	CYP711	Strigolactone signaling pathway and may be implicated in synthesis of carotenoid-derived branch regulators
	Glyma.13G285300	CYP82	Jasmonic Acid and Ethylene Signaling Pathway
	Glyma.16G195600	CYP71	Phenylpropanoid Pathway (Camaxlin Biosynthesis)
	Glyma.03G142100	CYP93	Flavonoid Metabolism	Y
	Glyma.11G062600	CYP71	Phenylpropanoid Pathway (Camaxlin Biosynthesis)
	Glyma.15G156100	CYP81	Phenylpropanoid Pathway	Y
	Glyma.11G062500	CYP71	Phenylpropanoid Pathway (Camaxlin Biosynthesis)
	Glyma.01G135200	CYP82	Jasmonic Acid and Ethylene Signaling Pathway
	Glyma.09G049200	CYP81	Phenylpropanoid Pathway
	Glyma.19G014600	CYP82	Jasmonic Acid and Ethylene Signaling Pathway
	Glyma.09G049300	CYP81	Phenylpropanoid Pathway
	Glyma.19G146800	CYP93	Flavonoid Metabolism
PRJNA210431, PRJNA318321, PRJNA544432, PRJNA324419, PRJNA574764-common.15
	Glyma.11G051800	CYP81	Phenylpropanoid Pathway					7
	Glyma.15G203500	CYP82	Jasmonic Acid and Ethylene Signaling Pathway
	Glyma.03G143700	CYP93	Flavonoid Metabolism	Y		Characterized	3,9-dihydroxypterocarpan 6A-monooxygenase
	Glyma.09G048700	CYP81	Phenylpropanoid Pathway
	Glyma.11G122700	CYP74	May play a defensive role against soil-borne pests that affect roots (Allene oxide synthase 3)
	Glyma.13G120500	CYP94	Jasmonoyl-isoleucine for catabolic turnover	Y
	Glyma.14G015100	CYP71	Phenylpropanoid Pathway (Camaxlin Biosynthesis)
	Glyma.19G162100	CYP94	Jasmonoyl-isoleucine for catabolic turnover	Y
	Glyma.07G202300	CYP93	Flavonoid Metabolism	Y		Characterized	1-hydroxyisoflavanone synthase
	Glyma.05G022100	CYP75	Phenylpropanoid Pathway (F3'H, F3',5' H)
	Glyma.08G140600	CYP736	Phytoalexin (Aucuparin) Biosynthesis in Apple	Y
	Glyma.09G049100	CYP81	Phenylpropanoid Pathway
	Glyma.07G089800	CYP736	Phytoalexin (Aucuparin) Biosynthesis in Apple	Y
	Glyma.02G156000	CYP71	Phenylpropanoid Pathway (Camaxlin Biosynthesis)	Y
	Glyma.19G144700	CYP93	Flavonoid Metabolism
PRJNA210431, PRJNA318321, PRJNA478334, PRJNA324419, PRJNA574764-common.7
	Glyma.01G153300	CYP707	ABA 8’-hydroxylase					3
	Glyma.16G090000	CYP82	Jasmonic Acid and Ethylene Signaling Pathway	Y
	Glyma.15G243300	CYP72	Confers tolerance to acetolactate synthase-inhibiting herbicides in Arabidopsis and rice			Characterized	SG-5 (convert soyasapogenol B to soyasapogenol A)
	Glyma.20G159700	CYP715	Key regulator of flower maturation, synchronizing petal expansion and volatile emission
	Glyma.20G147900	CYP76	Metabolism of both natural and xenobiotic compounds/Sesquiterpene Biosynthesis santalols and bergamotol
	Glyma.10G200800	CYP76	Metabolism of both natural and xenobiotic compounds/Sesquiterpene Biosynthesis santalols and bergamotol	Y
	Glyma.03G030800	CYP83	Oxime Biosynthesis	Y
PRJNA210431, PRJNA318321, PRJNA544432, PRJNA478334, PRJNA574764-common.2
	Glyma.05G010200	CYP734	BRs inactivation
	Glyma.03G160100	CYP94	Jasmonoyl-isoleucine for catabolic turnover
PRJNA210431, PRJNA544432, PRJNA478334, PRJNA324419, PRJNA574764-common.1
	Glyma.05G042800	CYP71	Phenylpropanoid Pathway (Camaxlin Biosynthesis)
PRJNA210431, PRJNA318321, PRJNA324419, PRJNA574764-common.11
	Glyma.11G185700	CYP94	Jasmonoyl-isoleucine for catabolic turnover					5
	Glyma.01G181800	CYP82	Jasmonic Acid and Ethylene Signaling Pathway	Y
	Glyma.06G140000	CYP714	Gibberellin Biosynthesis	Y
	Glyma.06G035300	CYP82	Jasmonic Acid and Ethylene Signaling Pathway
	Glyma.03G160200	CYP94	Jasmonoyl-isoleucine for catabolic turnover
	Glyma.15G245300	CYP72	Confers tolerance to acetolactate synthase-inhibiting herbicides in Arabidopsis and rice
	Glyma.06G176200	CYP71	Phenylpropanoid Pathway (Camaxlin Biosynthesis)	Y
	Glyma.05G021900	CYP75	Phenylpropanoid Pathway (F3'H, F3',5' H)
	Glyma.20G007000	CYP71	Phenylpropanoid Pathway (Camaxlin Biosynthesis)	Y
	Glyma.01G179600	CYP71	Phenylpropanoid Pathway (Camaxlin Biosynthesis)	Y
	Glyma.12G087200	CYP94	Jasmonoyl-isoleucine for catabolic turnover
PRJNA318321, PRJNA544432, PRJNA478334, PRJNA574764-common.10
	Glyma.18G080200	CYP71	Phenylpropanoid Pathway (Camaxlin Biosynthesis)	Y				5
	Glyma.09G186400	CYP736	Phytoalexin (Aucuparin) Biosynthesis in Apple
	Glyma.14G192500	CYP86	Suberin Biosynthesis			Characterized	Fatty acid ω-hydroxylases
	Glyma.11G175900	CYP86	Suberin Biosynthesis
	Glyma.19G003600	CYP96	Reported for Wax biosynthesis
	Glyma.07G052300	CYP78	Reported for organ growth	Y
	Glyma.07G162900	CYP74	May play a defensive role against soil-borne pests that affect roots (Allene oxide synthase 3)	Y
	Glyma.08G104100	CYP78	Reported for organ growth	Y
	Glyma.11G100100	CYP86	Suberin Biosynthesis
	Glyma.06G176100	CYP71	Phenylpropanoid Pathway	Y		Characterized	Metabolism of phenylurea class herbicides
PRJNA318321, PRJNA478334, PRJNA324419, PRJNA574764-common.6
	Glyma.15G095000	CYP710	Stigmasterol conversion that help in plant-pathogen interactions	Y				5
	Glyma.08G238100	CYP72	Confers tolerance to acetolactate synthase-inhibiting herbicides in Arabidopsis and rice	Y
	Glyma.08G243600	CYP716	triterpenoid biosynthesis	Y
	Glyma.08G350800	CYP93	Flavonoid Metabolism	Y		Characterized	β‐amyrin and sophoradiol 24‐hydroxylase
	Glyma.13G051600	CYP79	biosynthesis of the cyanogenic glucoside
	Glyma.19G258700	CYP78	Reported for organ growth	Y
PRJNA210431, PRJNA544432, PRJNA324419, PRJNA574764-common.3
	Glyma.10G203500	CYP76	Metabolism of both natural and xenobiotic compounds/Sesquiterpene Biosynthesis santalols and bergamotol	Y				3
	Glyma.13G072100	CYP75	Phenylpropanoid Pathway (F3'H, F3',5' H)	Y		Characterized	flavonoid 3', 5'-hydroxylase (associated with flowere color)
	Glyma.18G272300	CYP85	Brassinosteroid biosynthetic	Y
PRJNA210431, PRJNA318321, PRJNA478334, PRJNA574764-common.2
	Glyma.17G080500	CYP78	Reported for organ growth
	Glyma.19G033900	CYP85	Brassinosteroid biosynthetic
PRJNA210431, PRJNA318321, PRJNA544432, PRJNA574764-common.2
	Glyma.08G193900	CYP90	Brassinosteroid biosynthetic	Y				2
	Glyma.10G092500	CYP93	Flavonoid Metabolism	Y
PRJNA318321, PRJNA544432, PRJNA324419, PRJNA574764-common.2
	Glyma.13G152202	CYP94	Jasmonoyl-isoleucine for catabolic turnover
	Glyma.11G026200	CYP87	Terpenoid biosynthesis
PRJNA210431, PRJNA478334, PRJNA324419, PRJNA574764-common.1
	Glyma.18G223100	CYP76	Metabolism of both natural and xenobiotic compounds/Sesquiterpene Biosynthesis santalols and bergamotol	Y				1
PRJNA210431, PRJNA544432, PRJNA478334, PRJNA574764-common.1
	Glyma.01G179700	CYP71	Phenylpropanoid Pathway (Camaxlin Biosynthesis)	Y				1
PRJNA544432, PRJNA478334, PRJNA324419, PRJNA574764-common.1
	Glyma.16G076600	CYP707	ABA 8’-hydroxylase
							Total	38

## Sheet: Figure 7B genes
Genes in Coexpression network involving IFS2
Gene Id	GmP450 Family	Annotation	QTL underlying Gene (Y/N)	Characterized or not	Function
Glyma.13G173500	CYP93	Flavonoid Metabolism	Y	Y	2-hydroxyisoflavanone synthase
Glyma.11G062500	CYP71	Phenylpropanoid Pathway (Phytoalexin Biosynthesis)
Glyma.11G062600	CYP71	Phenylpropanoid Pathway (Phytoalexin Biosynthesis)
Glyma.08G243600	CYP716	triterpenoid biosynthesis	Y
Glyma.10G200800	CYP76	Metabolism of both natural and xenobiotic compounds/Sesquiterpene Biosynthesis santalols and bergamotol	Y
Glyma.15G156100	CYP81	Phenylpropanoid Pathway	Y
Glyma.09G049200	CYP81	Phenylpropanoid Pathway
Glyma.09G048900	CYP81	Phenylpropanoid Pathway
Glyma.13G285300	CYP82	Jasmonic Acid and Ethylene Signaling Pathway
Glyma.01G135200	CYP82	Jasmonic Acid and Ethylene Signaling Pathway
Glyma.03G143700	CYP93	Flavonoid Metabolism	Y	Y	3,9-dihydroxypterocarpan 6A-monooxygenase
Glyma.13G173401	CYP93	Flavonoid Metabolism
Glyma.07G202300	CYP93	Flavonoid Metabolism	Y	Y	1-hydroxyisoflavanone synthase
Genes in Coexpression network involving 3,9-dihydroxypterocarpan 6A-monooxygenase
Gene Id	GmP450 Family	Annotation	QTL underlying Gene (Y/N)	Characterized or not	Function
Glyma.03G143700	CYP93	Phenylpropanoid Pathway	Y	Y	3,9-dihydroxypterocarpan 6A-monooxygenase
Glyma.07G202300	CYP93	Flavonoid Metabolism	Y	Characterized	1-hydroxyisoflavanone synthase
Glyma.13G173500	CYP93	Flavonoid Metabolism	Y	Characterized	2-hydroxyisoflavanone synthase
Glyma.13G173401	CYP93	Flavonoid Metabolism
Glyma.19G146800	CYP93	Flavonoid Metabolism
Glyma.01G135200	CYP82	Jasmonic Acid and Ethylene Signaling Pathway
Glyma.13G285300	CYP82	Jasmonic Acid and Ethylene Signaling Pathway
Glyma.09G048900	CYP81	Phenylpropanoid Pathway
Glyma.09G049200	CYP81	Phenylpropanoid Pathway
Glyma.15G156100	CYP81	Phenylpropanoid Pathway	Y
Glyma.13G265300	CYP76	Metabolism of both natural and xenobiotic compounds/Sesquiterpene Biosynthesis santalols and bergamotol
Glyma.11G062500	CYP71	Phenylpropanoid Pathway (Camaxlin Biosynthesis)
Glyma.11G062600	CYP71	Phenylpropanoid Pathway (Camaxlin Biosynthesis)
Glyma.16G195600	CYP71	Phenylpropanoid Pathway (Camaxlin Biosynthesis)
