# Supplementary material for: Comprehensive Analysis of Cytochrome P450 Monooxygenases Reveals Insight Into Their Role in Partial Resistance Against Phytophthora sojae in Soybean
Source: Front Plant Sci. 2022 Apr 14;13:862314. doi: 10.3389/fpls.2022.862314 (PMC9048032; doi:10.3389/fpls.2022.862314)
Supplement: Supplementary Table 9 — A list of genome-wide study of P450s in plant species. [file Table_9.xlsx]

## Sheet: Sheet1
Table S7. Characteristics of P450s in plant genomes.
Plant speciess	Genome size (Mb)	Gene #	Family #	Reference
Glycine max	978	317	48	This study
Arabidopsis thaliana	135	246	47	Bak et al 2011
Oryza sativa	372	326	45	Wei and Chen 2018
Medicago truncatula	360	151	44	Li et al 2007
Vitis Vinifera	487	236	46	Jiu et al 2020
Solanum lycopersicum	900	233	42	Vasav et al 2019
Cicer arietinum	511	209	46	Nelson et al., 2008
Populus trichocarpa	434	312	54	Nelson et al., 2008
Sorghum bicolor	693	372	-	Nelson et al., 2008
Zea mays	2400	385	-	https://phytozome.jgi.doe.gov/pz/portal.html#
Fagopyrum tataricum	489	285	39	Sun et al 2020
Morus notabilia	357	174	47	Ma et al 2014
Ricinus communis	400	210	45	Kumar et al. 2014
Carica papaya	372	143	50	Nelson et al., 2008
Brassica oleracea	696	279	44	Ji et al., 2021
Nothapodytes nimmoniana	NA	94	38	Godbole et al., 2020
Fontainea venosa	NA	123	37	Mitu et al., 2021
Fontainea picrosperma	NA	103	37	Mitu et al., 2021
#NA: Genome sequence not available
